# Supplementary material for: Manganese-induced neurotoxicity in cerebellar granule neurons due to perturbation of cell network pathways with potential implications for neurodegenerative disorders
Source: Royal Society of Chemistry journal article supplement (doi:10.1039/d0mt00085j), 2020-07-21
Supplement: d0mt00085j1.xlsx [file d0mt00085j1.xlsx]

## Sheet: CTD-MnCl2
Pathway	Pathway ID	P-value	Corrected P-value	Annotated Genes Quantity	Annotated Genes	Genome Frequency
Immune System	REACT:R-HSA-168256	1.35e-99	2.4e-96	215	ABI2|ACTB|ADCY6|AKT1|ALDOA|ALDOC|ARG1|ASB5|ATF1|ATF2|ATP6V1A|ATP6V1E2|ATP7A|ATP8A1|BCL2|BCL2L1|BIRC5|BPIFB6|C4BPA|C5|CAMP|CARD9|CASP2|CASP3|CASP4|CASP8|CASP9|CAT|CCL19|CCL2|CCL5|CD28|CD44|CD74|CD86|CD8B|CDKN1A|CEBPD|CHUK|CIITA|CISH|CNKSR1|COLEC10|CR1|CREB1|CRK|CSF2|CSF3|CTNNB1|CTSD|CXCL1|CXCL10|CXCL2|CXCL8|DUSP2|DUSP4|DUSP5|DUSP6|EBI3|EGF|EGFR|EGR1|ERAP1|EREG|FASLG|FBXL4|FCGR1A|FCGR3A|FGF2|FGF20|…	2118/43622 genes: 4,86%
Signal Transduction	REACT:R-HSA-162582	1.56e-99	2.76e-96	235	ABI2|ACTB|ADCY6|ADM|ADORA2A|AKT1|ALDH1A1|APC|APOA2|ARHGAP24|ARHGDIA|ARHGEF10|ARHGEF16|ARHGEF4|ARHGEF6|ARHGEF7|ATF1|ATP2A3|ATP6V1A|ATP6V1E2|AXIN2|BCL2L11|BDKRB2|BIRC5|BUB1|C5|CASP2|CASP3|CASP8|CASP9|CCL19|CCL5|CD28|CD86|CDC42EP3|CDKN1A|CDKN2B|CFLAR|CFTR|CHUK|CNKSR1|COL4A5|COL6A1|CREB1|CRK|CSF2|CTNNA1|CTNNB1|CTNND1|CX3CL1|CXCL1|CXCL10|CXCL12|CXCL2|CXCL3|CXCL6|CXCL8|CYP26B1|DACT1|DHRS3|DLD|DLK1|DLL4…	2587/43622 genes: 5,93%
Cytokine Signaling in Immune system	REACT:R-HSA-1280215	5.92e-81	1.05e-77	125	AKT1|BCL2|BCL2L1|BIRC5|CASP3|CCL19|CCL2|CCL5|CD44|CD86|CDKN1A|CEBPD|CHUK|CIITA|CISH|CNKSR1|CRK|CSF2|CSF3|CXCL1|CXCL10|CXCL2|CXCL8|DUSP2|DUSP4|DUSP5|DUSP6|EBI3|EGF|EGFR|EGR1|EREG|FASLG|FCGR1A|FGF2|FGF20|FGFR2|FN1|FOS|GBP5|GDNF|GRIN1|GRIN2A|GRIN2B|H3C1|HGF|HIF1A|HLA-DRB4|HMOX1|HSP90B1|ICAM1|IFNG|IL12A|IL12B|IL18|IL1A|IL1B|IL1R1|IL1R2|IL1RL1|IL1RN|IL23A|IL6|IL7|IQGAP1|IRF2|ITGA2B|ITGAM|ITGB3|LCK|LIF…	760/43622 genes: 1,74%
Signaling by Interleukins	REACT:R-HSA-449147	5.11e-73	9.06e-70	102	AKT1|BCL2|BCL2L1|BIRC5|CASP3|CCL19|CCL2|CCL5|CD86|CDKN1A|CEBPD|CHUK|CNKSR1|CRK|CSF2|CSF3|CXCL1|CXCL10|CXCL2|CXCL8|DUSP2|DUSP4|DUSP5|DUSP6|EBI3|EGF|EGFR|EREG|FASLG|FGF2|FGF20|FGFR2|FN1|FOS|GDNF|GRIN1|GRIN2A|GRIN2B|H3C1|HGF|HIF1A|HMOX1|HSP90B1|ICAM1|IL12A|IL12B|IL18|IL1A|IL1B|IL1R1|IL1R2|IL1RL1|IL1RN|IL23A|IL6|IL7|IQGAP1|ITGA2B|ITGAM|ITGB3|LCK|LIF|LYN|MAP2K4|MAP3K11|MAP3K7|MAPK1|MAPK3|MCL1|MET|MMP3…	528/43622 genes: 1,21%
Pathways in cancer	KEGG:hsa05200	2.28e-67	4.03e-64	87	ADCY6|AKT1|APC|ARNT|AXIN2|BAX|BCL2|BCL2L1|BDKRB2|BID|BIRC5|BIRC7|BMP4|CASP3|CASP8|CASP9|CCNA1|CDKN1A|CDKN2B|CHUK|CKS2|COL4A5|CRK|CTNNA1|CTNNB1|CXCL12|CXCL8|CYCS|EGF|EGFR|EGLN3|EPAS1|FAS|FASLG|FGF2|FGF20|FGFR2|FN1|FOS|GNB4|GSK3B|HDAC2|HGF|HIF1A|HSP90B1|IGF1|IGF1R|IL6|ITGA2B|ITGA3|ITGAV|JUN|LPAR1|MAPK1|MAPK3|MAPK8|MAPK9|MDM2|MET|MMP9|MSH6|MTOR|NFKB1|NFKBIA|NOS2|PGF|PPARG|PRKACA|PRKCA|PTGS2|RELA|RET…	395/43622 genes: 0,91%
Innate Immune System	REACT:R-HSA-168249	9.29e-64	1.65e-60	137	ABI2|ACTB|ADCY6|AKT1|ALDOA|ALDOC|ARG1|ATF1|ATF2|ATP6V1A|ATP6V1E2|ATP7A|ATP8A1|BCL2|BCL2L1|BPIFB6|C4BPA|C5|CAMP|CARD9|CASP2|CASP4|CASP8|CASP9|CAT|CD28|CD44|CD86|CDKN1A|CHUK|CNKSR1|COLEC10|CR1|CREB1|CRK|CSF2|CTNNB1|CTSD|CXCL1|DUSP2|DUSP4|DUSP5|DUSP6|EGF|EGFR|EREG|FCGR1A|FCGR3A|FGF2|FGF20|FGFR2|FN1|FOS|FTH1|FTL|GDNF|GRIN1|GRIN2A|GRIN2B|GSK3B|HGF|HMGB1|HSP90B1|IGF2R|IL1B|INS|INSR|IQGAP1|IRF2|ITGA2B|I…	1298/43622 genes: 2,98%
Signalling by NGF	REACT:R-HSA-166520	1.22e-56	2.16e-53	84	ADCY6|ADORA2A|AKT1|ARHGDIA|ARHGEF10|ARHGEF16|ARHGEF4|ARHGEF6|ARHGEF7|ATF1|BCL2L11|CASP2|CASP3|CASP9|CD28|CD86|CDKN1A|CHUK|CNKSR1|CREB1|CRK|CSF2|DUSP2|DUSP4|DUSP5|DUSP6|EGF|EGFR|EREG|FGF2|FGF20|FGFR2|FN1|GDNF|GRIN1|GRIN2A|GRIN2B|GSK3B|HDAC2|HDAC3|HGF|INS|INSR|IQGAP1|ITGA2B|ITGB3|LCK|MAP3K11|MAPK1|MAPK11|MAPK14|MAPK3|MAPK8|MCF2L|MDM2|MEF2C|MET|MTOR|NEFL|NFKB1|NFKBIA|NGF|NGFR|NRG1|NRG2|NTRK2|PRKACA|…	477/43622 genes: 1,09%
PI3K-Akt signaling pathway	KEGG:hsa04151	7.86e-51	1.39e-47	69	AKT1|ANGPT2|ATF2|ATF4|BCL2|BCL2L1|BCL2L11|CASP9|CDKN1A|CHUK|COL4A5|COL6A1|CREB1|CSF3|EGF|EGFR|EIF4EBP1|EPHA2|FASLG|FGF2|FGF20|FGFR2|FLT1|FN1|GNB4|GSK3B|HGF|HSP90B1|IGF1|IGF1R|IL6|IL7|INS|INSR|ITGA10|ITGA2B|ITGA3|ITGA8|ITGAV|ITGB3|ITGB5|ITGB6|LPAR1|MAPK1|MAPK3|MCL1|MDM2|MET|MTOR|NFKB1|NGF|NGFR|NOS3|PDGFC|PGF|PRKCA|PRL|RELA|RELN|RPS6KB1|SGK1|TEK|THBS1|TNN|TP53|VEGFA|VEGFC|VEGFD|YWHAZ	341/43622 genes: 0,78%
TNF signaling pathway	KEGG:hsa04668	9.48e-48	1.68e-44	44	AKT1|ATF2|ATF4|CASP3|CASP8|CCL2|CCL5|CFLAR|CHUK|CREB1|CSF2|CX3CL1|CXCL1|CXCL10|CXCL2|CXCL3|EDN1|FAS|FOS|ICAM1|IL1B|IL6|JUN|LIF|MAP2K3|MAP2K4|MAP3K7|MAPK1|MAPK11|MAPK14|MAPK3|MAPK8|MAPK9|MMP14|MMP3|MMP9|NFKB1|NFKBIA|PTGS2|RELA|TAB3|TNF|VCAM1|VEGFC	108/43622 genes: 0,25%
Developmental Biology	REACT:R-HSA-1266738	1.57e-44	2.77e-41	104	ACTB|ADIPOQ|AKT1|ANGPTL4|ARHGEF7|CEBPD|CNKSR1|COL4A5|COL6A1|CREB1|CSF2|CTNNA1|CTNNB1|DPYSL3|DUSP2|DUSP4|DUSP5|DUSP6|EGF|EGFR|EGR2|EPAS1|EPHA2|EPHA4|EREG|FGF2|FGF20|FGFR2|FN1|GDNF|GRIN1|GRIN2A|GRIN2B|GSK3B|H2BU1|H3C1|HDAC3|HGF|HOXD4|INS|IQGAP1|ITGA10|ITGA2B|ITGAV|ITGB3|JUN|KCNQ2|KLF4|KLF5|KRT7|KRT76|KRT79|KRT81|KRT83|KRTAP1-3|LCE2B|LEFTY2|LGI4|LYN|MAP3K11|MAPK1|MAPK11|MAPK14|MAPK3|MEF2C|MET|MMP9|N…	1076/43622 genes: 2,47%
Fluid shear stress and atherosclerosis	KEGG:hsa05418	2.04e-44	3.62e-41	46	ACTB|AKT1|ASS1|BCL2|BMP4|CAV2|CCL2|CHUK|CTNNB1|EDN1|FOS|HMOX1|HSP90B1|ICAM1|IFNG|IL1A|IL1B|IL1R1|IL1R2|ITGA2B|ITGAV|ITGB3|JUN|KEAP1|KLF2|MAP2K4|MAP3K7|MAPK11|MAPK14|MAPK8|MAPK9|MEF2C|MGST1|MGST3|MMP9|NFE2L2|NFKB1|NOS3|NQO1|RELA|SQSTM1|SRC|TNF|TP53|VCAM1|VEGFA	142/43622 genes: 0,33%
IL-17 signaling pathway	KEGG:hsa04657	4.64e-43	8.22e-40	39	CASP3|CASP8|CCL17|CCL2|CCL7|CHUK|CSF2|CSF3|CXCL1|CXCL10|CXCL2|CXCL3|CXCL6|CXCL8|FOS|FOSL1|GSK3B|HSP90B1|IFNG|IL1B|IL6|JUN|MAP3K7|MAPK1|MAPK11|MAPK14|MAPK3|MAPK8|MAPK9|MMP13|MMP3|MMP9|NFKB1|NFKBIA|PTGS2|RELA|S100A9|TAB3|TNF	93/43622 genes: 0,21%
NGF signalling via TRKA from the plasma membrane	REACT:R-HSA-187037	1.36e-42	2.41e-39	65	ADCY6|ADORA2A|AKT1|ATF1|CASP9|CD28|CD86|CDKN1A|CHUK|CNKSR1|CREB1|CRK|CSF2|DUSP2|DUSP4|DUSP5|DUSP6|EGF|EGFR|EREG|FGF2|FGF20|FGFR2|FN1|GDNF|GRIN1|GRIN2A|GRIN2B|GSK3B|HGF|INS|INSR|IQGAP1|ITGA2B|ITGB3|LCK|MAP3K11|MAPK1|MAPK11|MAPK14|MAPK3|MDM2|MEF2C|MET|MTOR|NEFL|NGF|NRG1|NRG2|NTRK2|PRKACA|PRKCA|PRKCD|RET|SHC3|SPTBN2|SRC|STAT3|SYNGAP1|TEK|TLN1|TNRC6A|TP53|TRIB3|UBB	387/43622 genes: 0,89%
Metabolism	REACT:R-HSA-1430728	3.42e-42	6.06e-39	144	ACHE|ACO2|ACOT2|ACP5|ACSL3|ACSS2|ADCY6|ADIPOQ|AFMID|AKR1B1|AKT1|ALB|ALDH18A1|ALDH1A1|ALDH4A1|ALDOA|ALDOC|ANGPTL4|APOA2|ARG1|ARNT|ARNTL|ASNS|ASS1|BLVRA|CAT|CBS|CCN2|CD44|CERS1|CERS6|CH25H|CHAT|CHST5|CLOCK|CSPG4|CYCS|CYP11A1|CYP26B1|DBH|DLD|DPEP1|DPEP2|ELOVL6|ENO2|FA2H|FADS2|FASN|FBP2|FDPS|FMO2|G0S2|GALE|GAPDH|GBE1|GCDH|GCGR|GCH1|GLUL|GNB4|GPX1|GSR|HDAC3|HILPDA|HMGCS2|HMOX1|HSD11B1|INS|INSIG1|IQGAP…	2172/43622 genes: 4,98%
Fc epsilon receptor (FCERI) signaling	REACT:R-HSA-2454202	3.6e-42	6.37e-39	64	AKT1|CASP9|CD28|CD86|CDKN1A|CHUK|CNKSR1|CREB1|CSF2|DUSP2|DUSP4|DUSP5|DUSP6|EGF|EGFR|EREG|FGF2|FGF20|FGFR2|FN1|FOS|GDNF|GRIN1|GRIN2A|GRIN2B|GSK3B|HGF|INS|INSR|IQGAP1|ITGA2B|ITGB3|JUN|LCK|LYN|MAP2K4|MAP3K11|MAP3K7|MAPK1|MAPK3|MAPK8|MAPK9|MDM2|MET|MTOR|NEFL|NFKB1|NFKBIA|NRG1|NRG2|PRKCQ|RELA|RET|SHC3|SPTBN2|SRC|SYNGAP1|TAB3|TEK|TLN1|TNRC6A|TP53|TRIB3|UBB	378/43622 genes: 0,87%
Signaling by VEGF	REACT:R-HSA-194138	6.33e-42	1.12e-38	61	ABI2|AKT1|CNKSR1|CRK|CSF2|CTNNA1|CTNNB1|CTNND1|DUSP2|DUSP4|DUSP5|DUSP6|EGF|EGFR|EREG|FGF2|FGF20|FGFR2|FLT1|FN1|GDNF|GRIN1|GRIN2A|GRIN2B|HGF|IQGAP1|ITGA2B|ITGAV|ITGB3|MAP3K11|MAPK1|MAPK11|MAPK14|MAPK3|MET|MTOR|NCF4|NEFL|NOS3|NRG1|NRG2|NRP1|NRP2|PGF|PRKACA|PRKCA|PRKCD|PTK2B|RET|SHC3|SPTBN2|SRC|SYNGAP1|TEK|TLN1|TRIB3|UBB|VEGFA|VEGFC|VEGFD|WASF2	338/43622 genes: 0,77%
Interleukin-4 and 13 signaling	REACT:R-HSA-6785807	6.93e-42	1.23e-38	41	AKT1|BCL2|BCL2L1|BIRC5|CCL2|CDKN1A|CEBPD|CXCL8|FASLG|FGF2|FN1|FOS|HGF|HIF1A|HMOX1|HSP90B1|ICAM1|IL12A|IL12B|IL18|IL1A|IL1B|IL23A|IL6|ITGAM|LIF|MCL1|MMP3|MMP9|NOS2|PTGS2|S1PR1|SAA1|SOCS1|STAT3|TGFB1|TNF|TP53|VCAM1|VEGFA|VIM	114/43622 genes: 0,26%
HIF-1 signaling pathway	KEGG:hsa04066	2.42e-41	4.29e-38	39	AKT1|ALDOA|ANGPT2|ARNT|BCL2|CDKN1A|EDN1|EGF|EGFR|EGLN3|EIF4EBP1|ENO2|FLT1|GAPDH|HIF1A|HMOX1|IFNG|IGF1|IGF1R|IL6|INS|INSR|MAPK1|MAPK3|MTOR|NFKB1|NOS2|NOS3|NPPA|PDK1|PRKCA|RELA|RPS6KB1|SERPINE1|STAT3|TEK|TFRC|VEGFA|VHL	101/43622 genes: 0,23%
Rap1 signaling pathway	KEGG:hsa04015	8.85e-41	1.57e-37	50	ACTB|ADCY6|ADORA2A|AKT1|ANGPT2|CRK|CTNNB1|CTNND1|DRD2|EGF|EGFR|EPHA2|FGF2|FGF20|FGFR2|FLT1|GRIN1|GRIN2A|GRIN2B|HGF|ID1|IGF1|IGF1R|INS|INSR|ITGA2B|ITGAM|ITGB3|LPAR1|MAP2K3|MAPK1|MAPK11|MAPK14|MAPK3|MET|NGF|NGFR|PDGFC|PGF|PLCE1|PRKCA|PRKD1|SIPA1L2|SRC|TEK|THBS1|TLN1|VEGFA|VEGFC|VEGFD	210/43622 genes: 0,48%
Apoptosis	KEGG:hsa04210	9.22e-41	1.63e-37	43	ACTB|AKT1|ATF4|ATM|BAX|BCL2|BCL2L1|BCL2L11|BID|BIRC5|CASP12|CASP2|CASP3|CASP8|CASP9|CFLAR|CHUK|CTSD|CTSW|CYCS|DDIT3|EIF2AK3|EIF2S1|ERN1|FAS|FASLG|FOS|GADD45A|HRK|JUN|MAPK1|MAPK3|MAPK8|MAPK9|MCL1|NFKB1|NFKBIA|NGF|PARP1|PMAIP1|RELA|TNF|TP53	138/43622 genes: 0,32%
AGE-RAGE signaling pathway in diabetic complications	KEGG:hsa04933	3.41e-40	6.04e-37	38	AKT1|BAX|BCL2|CASP3|CCL2|COL4A5|CXCL8|EDN1|EGR1|FN1|ICAM1|IL1A|IL1B|IL6|JUN|MAPK1|MAPK11|MAPK14|MAPK3|MAPK8|MAPK9|NFKB1|NOS3|PLCE1|PRKCA|PRKCD|RELA|SERPINE1|STAT3|TGFB1|TGFB2|TGFB3|TGFBR1|TNF|VCAM1|VEGFA|VEGFC|VEGFD	99/43622 genes: 0,23%
Signaling by PDGF	REACT:R-HSA-186797	3.6e-40	6.38e-37	62	ADCY6|AKT1|CASP9|CD28|CD86|CDKN1A|CHUK|CNKSR1|COL4A5|COL6A1|CREB1|CRK|CSF2|DUSP2|DUSP4|DUSP5|DUSP6|EGF|EGFR|EREG|FGF2|FGF20|FGFR2|FN1|GDNF|GRIN1|GRIN2A|GRIN2B|GSK3B|HGF|INS|INSR|IQGAP1|ITGA2B|ITGB3|LCK|MAP3K11|MAPK1|MAPK3|MDM2|MET|MTOR|NEFL|NRG1|NRG2|PDGFC|PRKACA|PRKCA|PRKCD|RET|SHC3|SPTBN2|SRC|STAT3|SYNGAP1|TEK|THBS1|TLN1|TNRC6A|TP53|TRIB3|UBB	376/43622 genes: 0,86%
MAPK signaling pathway	KEGG:hsa04010	7.15e-40	1.27e-36	53	AKT1|ATF2|ATF4|BDNF|CASP3|CHUK|CRK|DDIT3|DUSP2|DUSP4|DUSP5|DUSP6|EGF|EGFR|FAS|FASLG|FGF2|FGF20|FGFR2|FOS|GADD45A|IL1A|IL1B|IL1R1|IL1R2|JUN|MAP2K3|MAP2K4|MAP3K11|MAP3K7|MAP4K3|MAPK1|MAPK11|MAPK14|MAPK3|MAPK8|MAPK9|MAPT|MEF2C|NFKB1|NGF|NTF3|NTRK2|PRKACA|PRKCA|PTPN5|RELA|TGFB1|TGFB2|TGFB3|TGFBR1|TNF|TP53	255/43622 genes: 0,58%
Hepatitis B	KEGG:hsa05161	7.32e-40	1.3e-36	43	AKT1|ATF2|ATF4|BAX|BCL2|BIRC5|CASP12|CASP3|CASP8|CASP9|CCNA1|CDKN1A|CHUK|CREB1|CXCL8|CYCS|EGR2|EGR3|FAS|FASLG|FOS|IL6|JUN|MAP2K4|MAPK1|MAPK3|MAPK8|MAPK9|MMP9|NFKB1|NFKBIA|PRKCA|PTK2B|RELA|SRC|STAT3|TGFB1|TGFB2|TGFB3|TGFBR1|TNF|TP53|YWHAZ	144/43622 genes: 0,33%
HTLV-I infection	KEGG:hsa05166	1.33e-38	2.36e-35	52	ADCY6|AKT1|APC|ATF1|ATF2|ATF4|ATM|BAX|BCL2L1|CCNB2|CDKN1A|CDKN2B|CDKN2C|CHUK|CREB1|CSF2|CTNNB1|EGR1|EGR2|FDPS|FOS|FOSL1|GSK3B|HLA-DRB4|ICAM1|IL1R1|IL1R2|IL6|JUN|LCK|MAP2K4|MAPK8|MSX2|NFKB1|NFKBIA|NFYB|NRP1|PRKACA|RELA|TGFB1|TGFB2|TGFB3|TGFBR1|TLN1|TNF|TP53|VCAM1|WNT10B|WNT11|WNT6|WNT7B|XBP1	256/43622 genes: 0,59%
Hemostasis	REACT:R-HSA-109582	7.31e-38	1.29e-34	75	AKT1|ALB|ALDOA|ANGPT2|ATP2A3|ATP2B2|ATP2B4|CABLES1|CD44|CD48|CD74|CRK|CSF2|CTSW|EGF|FN1|GNB4|H3C1|HDAC2|HGF|HSPA5|IGF1|IGF2|IRF2|ITGA10|ITGA2B|ITGA3|ITGAM|ITGAV|ITGB3|KIF3B|KNG1|LCK|LEFTY2|LHFPL2|LRP8|LYN|MAFF|MAPK1|MAPK14|MAPK3|MFN2|NOS1|NOS2|NOS3|PCDH7|PRKACA|PRKCA|PRKCD|PRKCQ|PROC|PROS1|RHOB|S100A10|SELP|SERPINB2|SERPINE1|SERPINE2|SLC16A3|SLC7A11|SOD1|SRC|SYTL4|TAGLN2|TEK|TGFB1|TGFB2|TGFB3|THB…	639/43622 genes: 1,46%
Proteoglycans in cancer	KEGG:hsa05205	8.64e-38	1.53e-34	47	ACTB|AKT1|CASP3|CAV2|CD44|CDKN1A|CTNNB1|EGFR|ESR1|FAS|FASLG|FGF2|FN1|HGF|HIF1A|IGF1|IGF1R|IGF2|IL12B|IQGAP1|ITGAV|ITGB3|ITGB5|MAPK1|MAPK11|MAPK14|MAPK3|MDM2|MET|MMP9|MTOR|PLCE1|PRKACA|PRKCA|RPS6KB1|SRC|STAT3|TGFB1|TGFB2|THBS1|TNF|TP53|VEGFA|WNT10B|WNT11|WNT6|WNT7B	203/43622 genes: 0,47%
Signaling by SCF-KIT	REACT:R-HSA-1433557	1.26e-37	2.23e-34	57	AKT1|CASP9|CD28|CD86|CDKN1A|CHUK|CNKSR1|CREB1|CSF2|DUSP2|DUSP4|DUSP5|DUSP6|EGF|EGFR|EREG|FGF2|FGF20|FGFR2|FN1|GDNF|GRIN1|GRIN2A|GRIN2B|GSK3B|HGF|INS|INSR|IQGAP1|ITGA2B|ITGB3|LCK|LYN|MAP3K11|MAPK1|MAPK3|MDM2|MET|MMP9|MTOR|NEFL|NRG1|NRG2|PRKCA|RET|SHC3|SOCS1|SPTBN2|SRC|STAT3|SYNGAP1|TEK|TLN1|TNRC6A|TP53|TRIB3|UBB	337/43622 genes: 0,77%
Downstream signal transduction	REACT:R-HSA-186763	1.29e-37	2.28e-34	58	ADCY6|AKT1|CASP9|CD28|CD86|CDKN1A|CHUK|CNKSR1|CREB1|CRK|CSF2|DUSP2|DUSP4|DUSP5|DUSP6|EGF|EGFR|EREG|FGF2|FGF20|FGFR2|FN1|GDNF|GRIN1|GRIN2A|GRIN2B|GSK3B|HGF|INS|INSR|IQGAP1|ITGA2B|ITGB3|LCK|MAP3K11|MAPK1|MAPK3|MDM2|MET|MTOR|NEFL|NRG1|NRG2|PRKACA|PRKCA|PRKCD|RET|SHC3|SPTBN2|SRC|STAT3|SYNGAP1|TEK|TLN1|TNRC6A|TP53|TRIB3|UBB	352/43622 genes: 0,81%
Tuberculosis	KEGG:hsa05152	8.69e-37	1.54e-33	44	AKT1|BAX|BCL2|BID|CAMP|CARD9|CASP3|CASP8|CASP9|CD74|CIITA|CR1|CREB1|CTSD|CYCS|FCGR1A|FCGR3A|HLA-DRB4|IFNG|IL12A|IL12B|IL18|IL1A|IL1B|IL23A|IL6|ITGAM|MAPK1|MAPK11|MAPK14|MAPK3|MAPK8|MAPK9|NFKB1|NFYB|NOS2|PLA2R1|RELA|SRC|TGFB1|TGFB2|TGFB3|TLR6|TNF	178/43622 genes: 0,41%
Chagas disease (American trypanosomiasis)	KEGG:hsa05142	1.41e-36	2.5e-33	36	ACE|AKT1|BDKRB2|CASP8|CCL2|CCL5|CFLAR|CHUK|CXCL8|FAS|FASLG|FOS|IFNG|IL12A|IL12B|IL1B|IL6|JUN|MAP2K4|MAPK1|MAPK11|MAPK14|MAPK3|MAPK8|MAPK9|NFKB1|NFKBIA|NOS2|RELA|SERPINE1|TGFB1|TGFB2|TGFB3|TGFBR1|TLR6|TNF	102/43622 genes: 0,23%
Cytokine-cytokine receptor interaction	KEGG:hsa04060	3.13e-36	5.54e-33	51	CCL17|CCL19|CCL2|CCL5|CCL7|CSF2|CSF3|CX3CL1|CXCL1|CXCL10|CXCL12|CXCL14|CXCL2|CXCL3|CXCL6|CXCL8|EGF|EGFR|FAS|FASLG|FLT1|HGF|IFNG|IL12A|IL12B|IL18|IL1A|IL1B|IL1R1|IL1R2|IL23A|IL6|IL7|LIF|MET|NGFR|PDGFC|PRL|TGFB1|TGFB2|TGFB3|TGFBR1|TNF|TNFRSF12A|TNFRSF13B|TNFRSF25|TNFRSF9|TNFSF15|VEGFA|VEGFC|VEGFD	270/43622 genes: 0,62%
VEGFA-VEGFR2 Pathway	REACT:R-HSA-4420097	5.44e-36	9.64e-33	55	ABI2|AKT1|CNKSR1|CRK|CSF2|CTNNA1|CTNNB1|CTNND1|DUSP2|DUSP4|DUSP5|DUSP6|EGF|EGFR|EREG|FGF2|FGF20|FGFR2|FN1|GDNF|GRIN1|GRIN2A|GRIN2B|HGF|IQGAP1|ITGA2B|ITGAV|ITGB3|MAP3K11|MAPK1|MAPK11|MAPK14|MAPK3|MET|MTOR|NCF4|NEFL|NOS3|NRG1|NRG2|PRKACA|PRKCA|PRKCD|PTK2B|RET|SHC3|SPTBN2|SRC|SYNGAP1|TEK|TLN1|TRIB3|UBB|VEGFA|WASF2	330/43622 genes: 0,76%
Signaling by EGFR	REACT:R-HSA-177929	9.61e-36	1.7e-32	57	ADCY6|AKT1|ARHGEF7|CASP9|CD28|CD86|CDKN1A|CHUK|CNKSR1|CREB1|CSF2|DUSP2|DUSP4|DUSP5|DUSP6|EGF|EGFR|EREG|FGF2|FGF20|FGFR2|FN1|GDNF|GRIN1|GRIN2A|GRIN2B|GSK3B|HGF|INS|INSR|IQGAP1|ITGA2B|ITGB3|LCK|MAP3K11|MAPK1|MAPK3|MDM2|MET|MTOR|NEFL|NRG1|NRG2|PRKACA|PRKCA|PRKCD|RET|SHC3|SPTBN2|SRC|SYNGAP1|TEK|TLN1|TNRC6A|TP53|TRIB3|UBB	364/43622 genes: 0,83%
DAP12 signaling	REACT:R-HSA-2424491	3.06e-35	5.41e-32	56	ADCY6|AKT1|CASP9|CD28|CD86|CDKN1A|CHUK|CNKSR1|CREB1|CSF2|DUSP2|DUSP4|DUSP5|DUSP6|EGF|EGFR|EREG|FGF2|FGF20|FGFR2|FN1|GDNF|GRIN1|GRIN2A|GRIN2B|GSK3B|HGF|INS|INSR|IQGAP1|ITGA2B|ITGB3|LCK|MAP3K11|MAPK1|MAPK3|MDM2|MET|MTOR|NEFL|NRG1|NRG2|PRKACA|PRKCA|PRKCD|RET|SHC3|SPTBN2|SRC|SYNGAP1|TEK|TLN1|TNRC6A|TP53|TRIB3|UBB	356/43622 genes: 0,82%
Focal adhesion	KEGG:hsa04510	1.6e-34	2.84e-31	44	ACTB|AKT1|BCL2|CAV2|COL4A5|COL6A1|CRK|CTNNB1|EGF|EGFR|FLT1|FN1|GSK3B|HGF|IGF1|IGF1R|ITGA10|ITGA2B|ITGA3|ITGA8|ITGAV|ITGB3|ITGB5|ITGB6|JUN|MAPK1|MAPK3|MAPK8|MAPK9|MET|MYLK2|MYLK3|PDGFC|PGF|PRKCA|RELN|SHC3|SRC|THBS1|TLN1|TNN|VEGFA|VEGFC|VEGFD	199/43622 genes: 0,46%
DAP12 interactions	REACT:R-HSA-2172127	2.91e-34	5.16e-31	56	ADCY6|AKT1|CASP9|CD28|CD86|CDKN1A|CHUK|CNKSR1|CREB1|CSF2|DUSP2|DUSP4|DUSP5|DUSP6|EGF|EGFR|EREG|FGF2|FGF20|FGFR2|FN1|GDNF|GRIN1|GRIN2A|GRIN2B|GSK3B|HGF|INS|INSR|IQGAP1|ITGA2B|ITGB3|LCK|MAP3K11|MAPK1|MAPK3|MDM2|MET|MTOR|NEFL|NRG1|NRG2|PRKACA|PRKCA|PRKCD|RET|SHC3|SPTBN2|SRC|SYNGAP1|TEK|TLN1|TNRC6A|TP53|TRIB3|UBB	371/43622 genes: 0,85%
Extracellular matrix organization	REACT:R-HSA-1474244	4.18e-34	7.4e-31	51	ADAMTS1|ADAMTS5|BMP4|CAPN5|CASP3|CD44|COL12A1|COL15A1|COL17A1|COL18A1|COL4A5|COL5A2|COL6A1|COL7A1|COL8A1|CTSD|DSPP|FBLN2|FBN1|FGF2|FN1|HTRA1|ICAM1|ITGA10|ITGA2B|ITGA3|ITGA8|ITGAM|ITGAV|ITGB3|ITGB5|ITGB6|LOX|MADCAM1|MATN3|MFAP2|MMP13|MMP14|MMP24|MMP3|MMP9|NTN4|PCOLCE2|PRKCA|SERPINE1|TGFB1|TGFB2|TGFB3|THBS1|TNN|VCAM1	297/43622 genes: 0,68%
Axon guidance	REACT:R-HSA-422475	5.5e-34	9.75e-31	66	ACTB|ARHGEF7|CNKSR1|COL4A5|COL6A1|CREB1|CSF2|DPYSL3|DUSP2|DUSP4|DUSP5|DUSP6|EGF|EGFR|EPHA2|EPHA4|EREG|FGF2|FGF20|FGFR2|FN1|GDNF|GRIN1|GRIN2A|GRIN2B|GSK3B|HGF|IQGAP1|ITGA10|ITGA2B|ITGAV|ITGB3|KCNQ2|LYN|MAP3K11|MAPK1|MAPK3|MET|MMP9|NEFL|NRG1|NRG2|NRP1|NRP2|NTN4|PRKACA|PRKCA|PRKCQ|PRNP|RET|RHOB|ROBO1|ROBO2|SCN3B|SCN5A|SCN7A|SEMA6A|SHC3|SIAH2|SPTBN2|SRC|SYNGAP1|TEK|TLN1|UBB|VEGFA	550/43622 genes: 1,26%
Influenza A	KEGG:hsa05164	1.48e-33	2.62e-30	41	ACTB|AKT1|ATF2|CASP9|CCL2|CCL5|CIITA|CXCL10|CXCL8|CYCS|EIF2AK3|EIF2S1|FAS|FASLG|FDPS|GSK3B|HLA-DRB4|ICAM1|IFNG|IL12A|IL12B|IL18|IL1A|IL1B|IL6|JUN|MAP2K3|MAP2K4|MAPK1|MAPK11|MAPK14|MAPK3|MAPK8|MAPK9|NFKB1|NFKBIA|PABPN1L|PRKCA|RELA|RSAD2|TNF	173/43622 genes: 0,40%
Signaling by GPCR	REACT:R-HSA-372790	1.65e-32	2.93e-29	99	ADCY6|ADM|ADORA2A|AKT1|ARHGEF10|ARHGEF16|ARHGEF4|ARHGEF6|ARHGEF7|BDKRB2|C5|CCL19|CCL5|CNKSR1|CREB1|CSF2|CX3CL1|CXCL1|CXCL10|CXCL12|CXCL2|CXCL3|CXCL6|CXCL8|DRD1|DRD2|DUSP2|DUSP4|DUSP5|DUSP6|EDN1|EGF|EGFR|EREG|F2RL1|FGF2|FGF20|FGFR2|FN1|FSHB|GABBR2|GAL|GCGR|GDNF|GNB4|GNRH1|GPR18|GRIN1|GRIN2A|GRIN2B|HGF|HRH1|IQGAP1|ITGA2B|ITGB3|KISS1R|KNG1|LHB|LPAR1|MAP3K11|MAPK1|MAPK3|MCF2L|MCHR1|MET|MMP3|NEFL|NRG1…	1341/43622 genes: 3,07%
Metabolism of proteins	REACT:R-HSA-392499	3.41e-32	6.05e-29	109	ACE|ACHE|ACO2|ACTB|ADAMTS1|ADAMTS5|ADORA2A|ANKRD28|APC|AREG|ASNS|ATF4|ATF6|AXIN2|BECN1|BIRC5|CCL2|CCNA1|CFTR|CGB3|CHML|CHST10|CNTN4|COL7A1|COPG2|CPM|CTNNB1|CTSD|CXCL8|CXXC1|DDIT3|DPH1|DPP4|EIF2AK3|EIF2S1|EIF4EBP1|ERN1|ESR1|EXOC6|FSHB|GNB4|GSPT2|H2BU1|H3C1|HDAC3|HIF1A|HSP90B1|HSPA5|IGF1|IGF2|IGFBP5|INS|KEAP1|KIF5C|KLF4|LHB|LMAN2|LYPD6B|MAP3K7|MDM2|MGAT1|MTA1|NFKBIA|NFYB|NPPA|NSF|NTM|NUP210|PAPPA|P…	1623/43622 genes: 3,72%
FoxO signaling pathway	KEGG:hsa04068	5.4e-32	9.57e-29	36	AKT1|ATM|BCL2L11|BNIP3|CAT|CCNB2|CDKN1A|CDKN2B|CHUK|EGF|EGFR|FASLG|GADD45A|IGF1|IGF1R|IL6|INS|INSR|KLF2|MAPK1|MAPK11|MAPK14|MAPK3|MAPK8|MAPK9|MDM2|PRKAB2|PRKAG2|S1PR1|SGK1|SOD2|STAT3|TGFB1|TGFB2|TGFB3|TGFBR1	132/43622 genes: 0,30%
Ras signaling pathway	KEGG:hsa04014	6.46e-32	1.14e-28	44	AKT1|ANGPT2|BCL2L1|CHUK|EGF|EGFR|EPHA2|FASLG|FGF2|FGF20|FGFR2|FLT1|GNB4|GRIN1|GRIN2A|GRIN2B|HGF|IGF1|IGF1R|INS|INSR|MAPK1|MAPK3|MAPK8|MAPK9|MET|NFKB1|NGF|NGFR|PDGFC|PGF|PLA2G2A|PLA2G2D|PLCE1|PLD2|PRKACA|PRKCA|RELA|SHC3|SYNGAP1|TEK|VEGFA|VEGFC|VEGFD	227/43622 genes: 0,52%
Transmembrane transport of small molecules	REACT:R-HSA-382551	4.31e-31	7.64e-28	69	ABCA5|ABCA9|ABCC2|ADCY6|ADD2|ALB|ANO3|AQP3|ATP2A3|ATP2B2|ATP2B4|ATP6V1A|ATP6V1E2|ATP7A|ATP7B|ATP8A1|CFTR|EIF2S1|FTH1|FTL|FXYD2|GABRA1|GABRB3|GABRG2|GNB4|HEPH|HMOX1|MCOLN3|NEDD4L|NIPAL3|NUP210|PLN|PRKACA|SCNN1G|SGK1|SLC11A1|SLC11A2|SLC16A3|SLC1A2|SLC1A3|SLC22A1|SLC22A15|SLC24A3|SLC26A4|SLC29A1|SLC2A12|SLC2A13|SLC31A1|SLC38A3|SLC38A4|SLC39A14|SLC39A8|SLC40A1|SLC4A10|SLC5A7|SLC6A1|SLC6A3|SLC7A1|SLC7…	676/43622 genes: 1,55%
EGFR tyrosine kinase inhibitor resistance	KEGG:hsa01521	2.67e-30	4.72e-27	29	AKT1|BAX|BCL2|BCL2L1|BCL2L11|EGF|EGFR|EIF4EBP1|FGF2|FGFR2|GSK3B|HGF|IGF1|IGF1R|IL6|MAPK1|MAPK3|MET|MTOR|NRG1|NRG2|PDGFC|PRKCA|RPS6KB1|SHC3|SRC|STAT3|TGFA|VEGFA	79/43622 genes: 0,18%
Gastrin-CREB signalling pathway via PKC and MAPK	REACT:R-HSA-881907	3.76e-30	6.66e-27	56	BDKRB2|CNKSR1|CREB1|CSF2|DUSP2|DUSP4|DUSP5|DUSP6|EDN1|EGF|EGFR|EREG|F2RL1|FGF2|FGF20|FGFR2|FN1|GCGR|GDNF|GNB4|GNRH1|GRIN1|GRIN2A|GRIN2B|HGF|HRH1|IQGAP1|ITGA2B|ITGB3|KISS1R|KNG1|LPAR1|MAP3K11|MAPK1|MAPK3|MCHR1|MET|MMP3|NEFL|NRG1|NRG2|PRKCA|PRKCD|PRKCQ|RET|RGS2|SAA1|SHC3|SPTBN2|SRC|SYNGAP1|TACR1|TACR2|TEK|TLN1|UBB	443/43622 genes: 1,02%
Disease	REACT:R-HSA-1643685	5.15e-30	9.12e-27	76	ADAMTS1|ADAMTS5|AKT1|ALB|APC|BCL2L11|CASP9|CD28|CD86|CD8B|CDKN1A|CFTR|CHUK|CNKSR1|CREB1|CSPG4|CTNNB1|CTNND1|CYP11A1|DLL4|EGF|EGFR|EREG|FASLG|FGF2|FGF20|FGFR2|FN1|GSK3B|GTF2H1|HDAC2|HDAC3|HDAC4|HEY1|HGF|IQGAP1|ITGA2B|ITGB3|JUN|KERA|LCK|MAP2K3|MAP2K4|MAP3K11|MAPK1|MAPK3|MDM2|MET|MTOR|NCOR2|NEDD4L|NFKB1|NFKBIA|NOTCH4|NRG1|NRG2|NUP210|RELA|RPS23|SFTPB|SOD2|SPON1|SRC|STAT3|SYNGAP1|TAF4B|TAF7L|TAF9B|TG…	860/43622 genes: 1,97%
Rheumatoid arthritis	KEGG:hsa05323	5.39e-30	9.55e-27	30	ACP5|ATP6V1A|ATP6V1E2|CCL2|CCL5|CD28|CD86|CSF2|CXCL1|CXCL12|CXCL6|CXCL8|FLT1|FOS|HLA-DRB4|ICAM1|IFNG|IL18|IL1A|IL1B|IL23A|IL6|JUN|MMP3|TEK|TGFB1|TGFB2|TGFB3|TNF|VEGFA	89/43622 genes: 0,20%
IGF1R signaling cascade	REACT:R-HSA-2428924	8.38e-30	1.48e-26	47	AKT1|CNKSR1|CSF2|DUSP2|DUSP4|DUSP5|DUSP6|EGF|EGFR|EIF4EBP1|EREG|FGF2|FGF20|FGFR2|FN1|GDNF|GRIN1|GRIN2A|GRIN2B|HGF|IGF1|IGF1R|IGF2|IQGAP1|ITGA2B|ITGB3|MAP3K11|MAPK1|MAPK3|MET|MTOR|NEFL|NRG1|NRG2|PRKAB2|PRKAG2|RET|RPS6KB1|RRAGB|SHC3|SPTBN2|SRC|SYNGAP1|TEK|TLN1|TRIB3|UBB	298/43622 genes: 0,68%
IRS-related events triggered by IGF1R	REACT:R-HSA-2428928	8.38e-30	1.48e-26	47	AKT1|CNKSR1|CSF2|DUSP2|DUSP4|DUSP5|DUSP6|EGF|EGFR|EIF4EBP1|EREG|FGF2|FGF20|FGFR2|FN1|GDNF|GRIN1|GRIN2A|GRIN2B|HGF|IGF1|IGF1R|IGF2|IQGAP1|ITGA2B|ITGB3|MAP3K11|MAPK1|MAPK3|MET|MTOR|NEFL|NRG1|NRG2|PRKAB2|PRKAG2|RET|RPS6KB1|RRAGB|SHC3|SPTBN2|SRC|SYNGAP1|TEK|TLN1|TRIB3|UBB	298/43622 genes: 0,68%
Signaling by Type 1 Insulin-like Growth Factor 1 Receptor (IGF1R)	REACT:R-HSA-2404192	9.78e-30	1.73e-26	47	AKT1|CNKSR1|CSF2|DUSP2|DUSP4|DUSP5|DUSP6|EGF|EGFR|EIF4EBP1|EREG|FGF2|FGF20|FGFR2|FN1|GDNF|GRIN1|GRIN2A|GRIN2B|HGF|IGF1|IGF1R|IGF2|IQGAP1|ITGA2B|ITGB3|MAP3K11|MAPK1|MAPK3|MET|MTOR|NEFL|NRG1|NRG2|PRKAB2|PRKAG2|RET|RPS6KB1|RRAGB|SHC3|SPTBN2|SRC|SYNGAP1|TEK|TLN1|TRIB3|UBB	299/43622 genes: 0,69%
Transcriptional misregulation in cancer	KEGG:hsa05202	2.8e-29	4.96e-26	38	AFF1|ATF1|ATM|BCL2L1|CCNA1|CD86|CDKN1A|CDKN2C|CSF2|CXCL8|DDIT3|DUSP6|ETV4|ETV5|FCGR1A|FLT1|H3C1|HDAC2|ID2|IGF1|IGF1R|IL1R2|IL6|ITGAM|MDM2|MEF2C|MET|MMP3|MMP9|MPO|NFKB1|NGFR|PER2|PPARG|RELA|RUNX2|TP53|WT1	179/43622 genes: 0,41%
Signaling by Insulin receptor	REACT:R-HSA-74752	2.87e-29	5.09e-26	48	AKT1|ATP6V1A|ATP6V1E2|CNKSR1|CSF2|DUSP2|DUSP4|DUSP5|DUSP6|EGF|EGFR|EIF4EBP1|EREG|FGF2|FGF20|FGFR2|FN1|GDNF|GRIN1|GRIN2A|GRIN2B|HGF|INS|INSR|IQGAP1|ITGA2B|ITGB3|MAP3K11|MAPK1|MAPK3|MET|MTOR|NEFL|NRG1|NRG2|PRKAB2|PRKAG2|RET|RPS6KB1|RRAGB|SHC3|SPTBN2|SRC|SYNGAP1|TEK|TLN1|TRIB3|UBB	322/43622 genes: 0,74%
Toxoplasmosis	KEGG:hsa05145	3.68e-29	6.52e-26	32	AKT1|BCL2|BCL2L1|BIRC7|CASP3|CASP8|CASP9|CHUK|CIITA|CYCS|HLA-DRB4|IFNG|IL12A|IL12B|MAP2K3|MAP3K7|MAPK1|MAPK11|MAPK14|MAPK3|MAPK8|MAPK9|NFKB1|NFKBIA|NOS2|RELA|SOCS1|STAT3|TGFB1|TGFB2|TGFB3|TNF	113/43622 genes: 0,26%
Interleukin-10 signaling	REACT:R-HSA-6783783	4.66e-29	8.26e-26	24	CCL19|CCL2|CCL5|CD86|CSF2|CSF3|CXCL1|CXCL10|CXCL2|CXCL8|ICAM1|IL12A|IL12B|IL18|IL1A|IL1B|IL1R1|IL1R2|IL1RN|IL6|LIF|PTGS2|STAT3|TNF	49/43622 genes: 0,11%
Insulin receptor signalling cascade	REACT:R-HSA-74751	7.7e-29	1.36e-25	46	AKT1|CNKSR1|CSF2|DUSP2|DUSP4|DUSP5|DUSP6|EGF|EGFR|EIF4EBP1|EREG|FGF2|FGF20|FGFR2|FN1|GDNF|GRIN1|GRIN2A|GRIN2B|HGF|INS|INSR|IQGAP1|ITGA2B|ITGB3|MAP3K11|MAPK1|MAPK3|MET|MTOR|NEFL|NRG1|NRG2|PRKAB2|PRKAG2|RET|RPS6KB1|RRAGB|SHC3|SPTBN2|SRC|SYNGAP1|TEK|TLN1|TRIB3|UBB	297/43622 genes: 0,68%
Non-alcoholic fatty liver disease (NAFLD)	KEGG:hsa04932	1.1e-28	1.94e-25	35	ADIPOQ|AKT1|ATF4|BAX|BCL2L11|BID|CASP3|CASP8|COX6A2|CXCL8|CYCS|DDIT3|EIF2AK3|EIF2S1|ERN1|FAS|FASLG|GSK3B|IL1A|IL1B|IL6|INS|INSR|JUN|MAP3K11|MAPK8|MAPK9|NFKB1|PRKAB2|PRKAG2|RELA|SDHA|TGFB1|TNF|XBP1	149/43622 genes: 0,34%
Leishmaniasis	KEGG:hsa05140	1.34e-28	2.37e-25	27	CR1|FCGR1A|FCGR3A|FOS|HLA-DRB4|IFNG|IL12A|IL12B|IL1A|IL1B|ITGAM|JUN|MAP3K7|MAPK1|MAPK11|MAPK14|MAPK3|NCF4|NFKB1|NFKBIA|NOS2|PTGS2|RELA|TGFB1|TGFB2|TGFB3|TNF	72/43622 genes: 0,17%
Osteoclast differentiation	KEGG:hsa04380	1.96e-28	3.47e-25	33	ACP5|AKT1|CHUK|CREB1|FCGR1A|FCGR3A|FOS|FOSL1|IFNG|IL1A|IL1B|IL1R1|ITGB3|JUN|LCK|MAP3K7|MAPK1|MAPK11|MAPK14|MAPK3|MAPK8|MAPK9|NCF4|NFKB1|NFKBIA|PPARG|RELA|SOCS1|SQSTM1|TGFB1|TGFB2|TGFBR1|TNF	129/43622 genes: 0,30%
Cellular responses to stress	REACT:R-HSA-2262752	6.26e-28	1.11e-24	54	ARNT|ATM|ATP7A|BECN1|CAT|CCNA1|CDKN1A|CDKN2B|CDKN2C|CXCL8|CYCS|EGLN3|EPAS1|FOS|GPX1|GSK3B|GSR|H2BU1|H3C1|HIF1A|HIF1AN|HSPA4L|HSPA5|ID1|IL1A|IL6|JUN|MAP2K3|MAP2K4|MAPK1|MAPK11|MAPK14|MAPK3|MAPK8|MAPK9|MDM2|MTOR|NCF4|NFKB1|NUP210|PRKAB2|PRKAG2|RELA|RRAGB|SOD1|SOD2|SOD3|STAT3|TNRC6A|TP53|TXNRD1|UBB|VEGFA|VHL	451/43622 genes: 1,03%
Platelet activation, signaling and aggregation	REACT:R-HSA-76002	8.94e-28	1.58e-24	44	AKT1|ALB|ALDOA|CRK|CSF2|CTSW|EGF|FN1|GNB4|HGF|HSPA5|IGF1|IGF2|ITGA2B|ITGB3|KNG1|LCK|LEFTY2|LHFPL2|LYN|MAPK1|MAPK14|MAPK3|PCDH7|PRKCA|PRKCD|PRKCQ|PROS1|RHOB|SELP|SERPINE1|SOD1|SRC|SYTL4|TAGLN2|TGFB1|TGFB2|TGFB3|THBS1|TLN1|VEGFA|VEGFC|VEGFD|YWHAZ	282/43622 genes: 0,65%
IRS-mediated signalling	REACT:R-HSA-112399	5.31e-27	9.41e-24	44	AKT1|CNKSR1|CSF2|DUSP2|DUSP4|DUSP5|DUSP6|EGF|EGFR|EIF4EBP1|EREG|FGF2|FGF20|FGFR2|FN1|GDNF|GRIN1|GRIN2A|GRIN2B|HGF|IQGAP1|ITGA2B|ITGB3|MAP3K11|MAPK1|MAPK3|MET|MTOR|NEFL|NRG1|NRG2|PRKAB2|PRKAG2|RET|RPS6KB1|RRAGB|SHC3|SPTBN2|SRC|SYNGAP1|TEK|TLN1|TRIB3|UBB	294/43622 genes: 0,67%
Platinum drug resistance	KEGG:hsa01524	6.72e-27	1.19e-23	26	ABCC2|AKT1|ATM|ATP7A|ATP7B|BAX|BCL2|BCL2L1|BID|BIRC5|CASP3|CASP8|CASP9|CDKN1A|CYCS|FAS|FASLG|MAPK1|MAPK3|MDM2|MGST1|MGST3|MSH6|PMAIP1|SLC31A1|TP53	73/43622 genes: 0,17%
Amyotrophic lateral sclerosis (ALS)	KEGG:hsa05014	7.84e-27	1.39e-23	23	BAX|BCL2|BCL2L1|BID|CASP12|CASP3|CASP9|CAT|CYCS|GPX1|GRIN1|GRIN2A|GRIN2B|MAP2K3|MAPK11|MAPK14|NEFH|NEFL|NOS1|SLC1A2|SOD1|TNF|TP53	51/43622 genes: 0,12%
MyD88 cascade initiated on plasma membrane	REACT:R-HSA-975871	1.74e-26	3.09e-23	27	ATF1|ATF2|CHUK|CREB1|DUSP4|DUSP6|FOS|HMGB1|JUN|MAP2K3|MAP2K4|MAP3K7|MAPK1|MAPK11|MAPK14|MAPK3|MAPK8|MAPK9|MEF2C|NFKB1|NFKBIA|RELA|S100B|SAA1|TAB3|TLR5|UBB	84/43622 genes: 0,19%
Toll Like Receptor 10 (TLR10) Cascade	REACT:R-HSA-168142	1.74e-26	3.09e-23	27	ATF1|ATF2|CHUK|CREB1|DUSP4|DUSP6|FOS|HMGB1|JUN|MAP2K3|MAP2K4|MAP3K7|MAPK1|MAPK11|MAPK14|MAPK3|MAPK8|MAPK9|MEF2C|NFKB1|NFKBIA|RELA|S100B|SAA1|TAB3|TLR5|UBB	84/43622 genes: 0,19%
Toll Like Receptor 5 (TLR5) Cascade	REACT:R-HSA-168176	1.74e-26	3.09e-23	27	ATF1|ATF2|CHUK|CREB1|DUSP4|DUSP6|FOS|HMGB1|JUN|MAP2K3|MAP2K4|MAP3K7|MAPK1|MAPK11|MAPK14|MAPK3|MAPK8|MAPK9|MEF2C|NFKB1|NFKBIA|RELA|S100B|SAA1|TAB3|TLR5|UBB	84/43622 genes: 0,19%
FCERI mediated MAPK activation	REACT:R-HSA-2871796	1.9e-26	3.36e-23	42	CNKSR1|CSF2|DUSP2|DUSP4|DUSP5|DUSP6|EGF|EGFR|EREG|FGF2|FGF20|FGFR2|FN1|FOS|GDNF|GRIN1|GRIN2A|GRIN2B|HGF|IQGAP1|ITGA2B|ITGB3|JUN|LYN|MAP2K4|MAP3K11|MAPK1|MAPK3|MAPK8|MAPK9|MET|NEFL|NRG1|NRG2|RET|SHC3|SPTBN2|SRC|SYNGAP1|TEK|TLN1|UBB	271/43622 genes: 0,62%
Metabolic pathways	KEGG:hsa01100	2.55e-26	4.52e-23	87	ACO1|ACO2|ACOT2|ACP5|ACSL3|ACSS2|AFMID|AKR1B1|ALDH18A1|ALDH1A1|ALDH4A1|ALDOA|ALDOC|ARG1|ASNS|ASS1|ATP6V1A|ATP6V1E2|BLVRA|CBS|CERS1|CERS6|CHST10|CMPK2|COX6A2|CYCS|CYP11A1|CYP26B1|DBH|DHRS3|DLD|ENO2|FASN|FBP2|FDPS|FUT1|FUT2|GAD1|GALE|GAPDH|GBE1|GCDH|GCH1|GLUL|HMGCS2|HMOX1|HSD11B1|LPCAT4|LPIN1|ME1|ME3|MGAT1|MGAT5B|MMAB|MTAP|MTHFD2|MTHFD2L|MTM1|MTMR6|NAMPT|NAT8L|NOS1|NOS2|NOS3|NT5C1B|PLA2G2A|PLA2G2D|…	1270/43622 genes: 2,91%
Endocrine resistance	KEGG:hsa01522	3.18e-26	5.64e-23	28	ADCY6|AKT1|BAX|BCL2|CDKN1A|CDKN2C|DLL4|EGFR|ESR1|FOS|IGF1|IGF1R|JUN|MAPK1|MAPK11|MAPK14|MAPK3|MAPK8|MAPK9|MDM2|MMP9|MTOR|NOTCH4|PRKACA|RPS6KB1|SHC3|SRC|TP53	95/43622 genes: 0,22%
MyD88:Mal cascade initiated on plasma membrane	REACT:R-HSA-166058	3.18e-26	5.64e-23	28	ATF1|ATF2|CHUK|CREB1|DUSP4|DUSP6|FOS|HMGB1|JUN|MAP2K3|MAP2K4|MAP3K7|MAPK1|MAPK11|MAPK14|MAPK3|MAPK8|MAPK9|MEF2C|NFKB1|NFKBIA|RELA|S100B|SAA1|SOCS1|TAB3|TLR6|UBB	95/43622 genes: 0,22%
Toll Like Receptor 2 (TLR2) Cascade	REACT:R-HSA-181438	3.18e-26	5.64e-23	28	ATF1|ATF2|CHUK|CREB1|DUSP4|DUSP6|FOS|HMGB1|JUN|MAP2K3|MAP2K4|MAP3K7|MAPK1|MAPK11|MAPK14|MAPK3|MAPK8|MAPK9|MEF2C|NFKB1|NFKBIA|RELA|S100B|SAA1|SOCS1|TAB3|TLR6|UBB	95/43622 genes: 0,22%
Toll Like Receptor TLR1:TLR2 Cascade	REACT:R-HSA-168179	3.18e-26	5.64e-23	28	ATF1|ATF2|CHUK|CREB1|DUSP4|DUSP6|FOS|HMGB1|JUN|MAP2K3|MAP2K4|MAP3K7|MAPK1|MAPK11|MAPK14|MAPK3|MAPK8|MAPK9|MEF2C|NFKB1|NFKBIA|RELA|S100B|SAA1|SOCS1|TAB3|TLR6|UBB	95/43622 genes: 0,22%
Toll Like Receptor TLR6:TLR2 Cascade	REACT:R-HSA-168188	3.18e-26	5.64e-23	28	ATF1|ATF2|CHUK|CREB1|DUSP4|DUSP6|FOS|HMGB1|JUN|MAP2K3|MAP2K4|MAP3K7|MAPK1|MAPK11|MAPK14|MAPK3|MAPK8|MAPK9|MEF2C|NFKB1|NFKBIA|RELA|S100B|SAA1|SOCS1|TAB3|TLR6|UBB	95/43622 genes: 0,22%
Toll-Like Receptors Cascades	REACT:R-HSA-168898	7.79e-26	1.38e-22	33	ATF1|ATF2|CASP8|CHUK|CREB1|DUSP4|DUSP6|FOS|HMGB1|HSP90B1|ITGAM|JUN|MAP2K3|MAP2K4|MAP3K7|MAPK1|MAPK11|MAPK14|MAPK3|MAPK8|MAPK9|MEF2C|NFKB1|NFKBIA|RELA|S100A9|S100B|SAA1|SOCS1|TAB3|TLR5|TLR6|UBB	153/43622 genes: 0,35%
NOD-like receptor signaling pathway	KEGG:hsa04621	2.01e-25	3.56e-22	34	BCL2|BCL2L1|CAMP|CARD9|CASP12|CASP4|CASP8|CCL2|CCL5|CHUK|CXCL1|CXCL2|CXCL3|CXCL8|GBP5|IL18|IL1B|IL6|JUN|MAP3K7|MAPK1|MAPK11|MAPK14|MAPK3|MAPK8|MAPK9|MFN2|NAMPT|NFKB1|NFKBIA|PRKCD|RELA|TAB3|TNF	170/43622 genes: 0,39%
MAPK family signaling cascades	REACT:R-HSA-5683057	2.98e-25	5.28e-22	42	CDC42EP3|CNKSR1|CSF2|DUSP2|DUSP4|DUSP5|DUSP6|EGF|EGFR|EREG|ETV4|FGF2|FGF20|FGFR2|FN1|GDNF|GRIN1|GRIN2A|GRIN2B|HGF|IL6|IQGAP1|ITGA2B|ITGB3|JUN|MAP3K11|MAPK1|MAPK3|MET|NEFL|NRG1|NRG2|PRKACA|RET|SHC3|SPTBN2|SRC|SYNGAP1|TEK|TLN1|TNRC6A|UBB	290/43622 genes: 0,66%
Toll-like receptor signaling pathway	KEGG:hsa04620	5.27e-25	9.33e-22	28	AKT1|CASP8|CCL5|CD86|CHUK|CXCL10|CXCL8|FOS|IL12A|IL12B|IL1B|IL6|JUN|MAP2K3|MAP2K4|MAP3K7|MAPK1|MAPK11|MAPK14|MAPK3|MAPK8|MAPK9|NFKB1|NFKBIA|RELA|TLR5|TLR6|TNF	104/43622 genes: 0,24%
Toll Like Receptor 4 (TLR4) Cascade	REACT:R-HSA-166016	5.77e-25	1.02e-21	30	ATF1|ATF2|CASP8|CHUK|CREB1|DUSP4|DUSP6|FOS|HMGB1|ITGAM|JUN|MAP2K3|MAP2K4|MAP3K7|MAPK1|MAPK11|MAPK14|MAPK3|MAPK8|MAPK9|MEF2C|NFKB1|NFKBIA|RELA|S100B|SAA1|SOCS1|TAB3|TLR6|UBB	126/43622 genes: 0,29%
Activated TLR4 signalling	REACT:R-HSA-166054	5.93e-25	1.05e-21	29	ATF1|ATF2|CASP8|CHUK|CREB1|DUSP4|DUSP6|FOS|HMGB1|JUN|MAP2K3|MAP2K4|MAP3K7|MAPK1|MAPK11|MAPK14|MAPK3|MAPK8|MAPK9|MEF2C|NFKB1|NFKBIA|RELA|S100B|SAA1|SOCS1|TAB3|TLR6|UBB	115/43622 genes: 0,26%
Signalling to ERKs	REACT:R-HSA-187687	6.25e-25	1.11e-21	40	CNKSR1|CRK|CSF2|DUSP2|DUSP4|DUSP5|DUSP6|EGF|EGFR|EREG|FGF2|FGF20|FGFR2|FN1|GDNF|GRIN1|GRIN2A|GRIN2B|HGF|IQGAP1|ITGA2B|ITGB3|MAP3K11|MAPK1|MAPK11|MAPK14|MAPK3|MET|NEFL|NGF|NRG1|NRG2|RET|SHC3|SPTBN2|SRC|SYNGAP1|TEK|TLN1|UBB	263/43622 genes: 0,60%
Colorectal cancer	KEGG:hsa05210	7.99e-25	1.41e-21	23	AKT1|APC|AXIN2|BAX|BCL2|BIRC5|CASP3|CASP9|CTNNB1|CYCS|FOS|GSK3B|JUN|MAPK1|MAPK3|MAPK8|MAPK9|MSH6|TGFB1|TGFB2|TGFB3|TGFBR1|TP53	60/43622 genes: 0,14%
PI3K/AKT activation	REACT:R-HSA-198203	9.54e-25	1.69e-21	30	AKT1|CASP9|CD28|CD86|CDKN1A|CHUK|CREB1|EGF|EGFR|EREG|FGF2|FGF20|FGFR2|GSK3B|HGF|INS|INSR|LCK|MAPK1|MAPK3|MDM2|MET|MTOR|NGF|NRG1|NRG2|SRC|TNRC6A|TP53|TRIB3	128/43622 genes: 0,29%
Adaptive Immune System	REACT:R-HSA-1280218	1.13e-24	1.99e-21	67	AKT1|ASB5|CASP9|CD28|CD74|CD86|CD8B|CDKN1A|CHUK|CREB1|CTSD|EGF|EGFR|ERAP1|EREG|FBXL4|FCGR1A|FCGR3A|FGF2|FGF20|FGFR2|GSK3B|HGF|HLA-DRB4|HSPA5|ICAM1|INS|INSR|ITGAV|ITGB5|KEAP1|KIF3B|LCK|LYN|MADCAM1|MAP3K7|MAPK1|MAPK3|MDM2|MET|MTOR|NCF4|NEDD4L|NFKB1|NFKBIA|NRG1|NRG2|PRKACA|PRKCQ|PRKN|PVR|RELA|RNF144B|SIAH2|SIGLEC10|SOCS1|SPTBN2|SRC|TLR6|TNRC6A|TP53|TRIB3|UBA1|UBB|VCAM1|VHL|YWHAZ	818/43622 genes: 1,88%
Prostate cancer	KEGG:hsa05215	1.27e-24	2.25e-21	26	AKT1|ATF4|BCL2|CASP9|CDKN1A|CHUK|CREB1|CTNNB1|EGF|EGFR|FGFR2|GSK3B|HSP90B1|IGF1|IGF1R|INS|MAPK1|MAPK3|MDM2|MTOR|NFKB1|NFKBIA|PDGFC|RELA|TGFA|TP53	87/43622 genes: 0,20%
Neurotrophin signaling pathway	KEGG:hsa04722	1.72e-24	3.05e-21	29	AKT1|ARHGDIA|ATF4|BAX|BCL2|BDNF|CRK|FASLG|GSK3B|JUN|MAPK1|MAPK11|MAPK14|MAPK3|MAPK8|MAPK9|NFKB1|NFKBIA|NGF|NGFR|NTF3|NTRK2|NTRK3|PRKCD|RELA|SHC3|SORT1|TP53|TP73	119/43622 genes: 0,27%
Interleukin-3, 5 and GM-CSF signaling	REACT:R-HSA-512988	1.99e-24	3.53e-21	40	CNKSR1|CRK|CSF2|DUSP2|DUSP4|DUSP5|DUSP6|EGF|EGFR|EREG|FGF2|FGF20|FGFR2|FN1|GDNF|GRIN1|GRIN2A|GRIN2B|HGF|IQGAP1|ITGA2B|ITGB3|LYN|MAP3K11|MAPK1|MAPK3|MET|NEFL|NRG1|NRG2|PRKACA|RET|SHC3|SPTBN2|SRC|SYNGAP1|TEK|TLN1|UBB|YWHAZ	271/43622 genes: 0,62%
Signalling to RAS	REACT:R-HSA-167044	2.29e-24	4.05e-21	39	CNKSR1|CSF2|DUSP2|DUSP4|DUSP5|DUSP6|EGF|EGFR|EREG|FGF2|FGF20|FGFR2|FN1|GDNF|GRIN1|GRIN2A|GRIN2B|HGF|IQGAP1|ITGA2B|ITGB3|MAP3K11|MAPK1|MAPK11|MAPK14|MAPK3|MET|NEFL|NGF|NRG1|NRG2|RET|SHC3|SPTBN2|SRC|SYNGAP1|TEK|TLN1|UBB	256/43622 genes: 0,59%
Longevity regulating pathway	KEGG:hsa04211	2.46e-24	4.36e-21	26	ADCY6|ADIPOQ|AKT1|ATF2|ATF4|BAX|CAMKK2|CAT|CREB1|EIF4EBP1|IGF1|IGF1R|INS|INSR|MTOR|NFKB1|PPARG|PPARGC1A|PRKAB2|PRKACA|PRKAG2|RELA|RPS6KB1|SESN2|SOD2|TP53	89/43622 genes: 0,20%
MyD88-independent TLR3/TLR4 cascade	REACT:R-HSA-166166	2.51e-24	4.45e-21	27	ATF1|ATF2|CASP8|CHUK|CREB1|DUSP4|DUSP6|FOS|HMGB1|JUN|MAP2K3|MAP2K4|MAP3K7|MAPK1|MAPK11|MAPK14|MAPK3|MAPK8|MAPK9|MEF2C|NFKB1|NFKBIA|RELA|S100B|SAA1|TAB3|UBB	99/43622 genes: 0,23%
Toll Like Receptor 3 (TLR3) Cascade	REACT:R-HSA-168164	2.51e-24	4.45e-21	27	ATF1|ATF2|CASP8|CHUK|CREB1|DUSP4|DUSP6|FOS|HMGB1|JUN|MAP2K3|MAP2K4|MAP3K7|MAPK1|MAPK11|MAPK14|MAPK3|MAPK8|MAPK9|MEF2C|NFKB1|NFKBIA|RELA|S100B|SAA1|TAB3|UBB	99/43622 genes: 0,23%
TRIF-mediated TLR3/TLR4 signaling	REACT:R-HSA-937061	2.51e-24	4.45e-21	27	ATF1|ATF2|CASP8|CHUK|CREB1|DUSP4|DUSP6|FOS|HMGB1|JUN|MAP2K3|MAP2K4|MAP3K7|MAPK1|MAPK11|MAPK14|MAPK3|MAPK8|MAPK9|MEF2C|NFKB1|NFKBIA|RELA|S100B|SAA1|TAB3|UBB	99/43622 genes: 0,23%
VEGFR2 mediated cell proliferation	REACT:R-HSA-5218921	3.07e-24	5.44e-21	39	CNKSR1|CSF2|DUSP2|DUSP4|DUSP5|DUSP6|EGF|EGFR|EREG|FGF2|FGF20|FGFR2|FN1|GDNF|GRIN1|GRIN2A|GRIN2B|HGF|IQGAP1|ITGA2B|ITGB3|MAP3K11|MAPK1|MAPK3|MET|NEFL|NRG1|NRG2|PRKCA|PRKCD|RET|SHC3|SPTBN2|SRC|SYNGAP1|TEK|TLN1|UBB|VEGFA	258/43622 genes: 0,59%
Herpes simplex infection	KEGG:hsa05168	3.75e-24	6.64e-21	34	ARNTL|C5|CASP3|CASP8|CCL2|CCL5|CD74|CHUK|CLOCK|CYCS|EIF2AK3|EIF2S1|FAS|FASLG|FOS|HLA-DRB4|IFNG|IL12A|IL12B|IL1B|IL6|JUN|MAP3K7|MAPK8|MAPK9|NFKB1|NFKBIA|PER1|PER2|RELA|TAF4B|TAF9B|TNF|TP53	185/43622 genes: 0,42%
NCAM signaling for neurite out-growth	REACT:R-HSA-375165	4.03e-24	7.13e-21	40	CNKSR1|COL4A5|COL6A1|CREB1|CSF2|DUSP2|DUSP4|DUSP5|DUSP6|EGF|EGFR|EREG|FGF2|FGF20|FGFR2|FN1|GDNF|GRIN1|GRIN2A|GRIN2B|HGF|IQGAP1|ITGA2B|ITGB3|MAP3K11|MAPK1|MAPK3|MET|NEFL|NRG1|NRG2|PRNP|RET|SHC3|SPTBN2|SRC|SYNGAP1|TEK|TLN1|UBB	276/43622 genes: 0,63%
TRAF6 mediated induction of NFkB and MAP kinases upon TLR7/8 or 9 activation	REACT:R-HSA-975138	4.69e-24	8.3e-21	26	ATF1|ATF2|CHUK|CREB1|DUSP4|DUSP6|FOS|HMGB1|JUN|MAP2K3|MAP2K4|MAP3K7|MAPK1|MAPK11|MAPK14|MAPK3|MAPK8|MAPK9|MEF2C|NFKB1|NFKBIA|RELA|S100B|SAA1|TAB3|UBB	91/43622 genes: 0,21%
PIP3 activates AKT signaling	REACT:R-HSA-1257604	7.86e-24	1.39e-20	29	AKT1|CASP9|CD28|CD86|CDKN1A|CHUK|CREB1|EGF|EGFR|EREG|FGF2|FGF20|FGFR2|GSK3B|HGF|INS|INSR|LCK|MAPK1|MAPK3|MDM2|MET|MTOR|NRG1|NRG2|SRC|TNRC6A|TP53|TRIB3	125/43622 genes: 0,29%
Response to elevated platelet cytosolic Ca2+	REACT:R-HSA-76005	8.17e-24	1.45e-20	30	ALB|ALDOA|CTSW|EGF|FN1|HGF|HSPA5|IGF1|IGF2|ITGA2B|ITGB3|KNG1|LEFTY2|LHFPL2|PCDH7|PRKCA|PROS1|SELP|SERPINE1|SOD1|SYTL4|TAGLN2|TGFB1|TGFB2|TGFB3|THBS1|TLN1|VEGFA|VEGFC|VEGFD	137/43622 genes: 0,31%
Role of LAT2/NTAL/LAB on calcium mobilization	REACT:R-HSA-2730905	8.17e-24	1.45e-20	30	AKT1|CASP9|CD28|CD86|CDKN1A|CHUK|CREB1|EGF|EGFR|EREG|FGF2|FGF20|FGFR2|GSK3B|HGF|INS|INSR|LCK|LYN|MAPK1|MAPK3|MDM2|MET|MTOR|NRG1|NRG2|SRC|TNRC6A|TP53|TRIB3	137/43622 genes: 0,31%
ARMS-mediated activation	REACT:R-HSA-170984	8.38e-24	1.48e-20	38	CNKSR1|CRK|CSF2|DUSP2|DUSP4|DUSP5|DUSP6|EGF|EGFR|EREG|FGF2|FGF20|FGFR2|FN1|GDNF|GRIN1|GRIN2A|GRIN2B|HGF|IQGAP1|ITGA2B|ITGB3|MAP3K11|MAPK1|MAPK3|MET|NEFL|NGF|NRG1|NRG2|RET|SHC3|SPTBN2|SRC|SYNGAP1|TEK|TLN1|UBB	249/43622 genes: 0,57%
MyD88 dependent cascade initiated on endosome	REACT:R-HSA-975155	8.77e-24	1.55e-20	26	ATF1|ATF2|CHUK|CREB1|DUSP4|DUSP6|FOS|HMGB1|JUN|MAP2K3|MAP2K4|MAP3K7|MAPK1|MAPK11|MAPK14|MAPK3|MAPK8|MAPK9|MEF2C|NFKB1|NFKBIA|RELA|S100B|SAA1|TAB3|UBB	93/43622 genes: 0,21%
Toll Like Receptor 7/8 (TLR7/8) Cascade	REACT:R-HSA-168181	8.77e-24	1.55e-20	26	ATF1|ATF2|CHUK|CREB1|DUSP4|DUSP6|FOS|HMGB1|JUN|MAP2K3|MAP2K4|MAP3K7|MAPK1|MAPK11|MAPK14|MAPK3|MAPK8|MAPK9|MEF2C|NFKB1|NFKBIA|RELA|S100B|SAA1|TAB3|UBB	93/43622 genes: 0,21%
Diseases of signal transduction	REACT:R-HSA-5663202	9.5e-24	1.68e-20	45	AKT1|APC|BCL2L11|CASP9|CD28|CD86|CDKN1A|CHUK|CNKSR1|CREB1|CTNNB1|DLL4|EGF|EGFR|EREG|FGF2|FGF20|FGFR2|FN1|GSK3B|HDAC2|HDAC3|HDAC4|HEY1|HGF|IQGAP1|ITGA2B|ITGB3|LCK|MAP3K11|MAPK1|MAPK3|MDM2|MET|MTOR|NCOR2|NRG1|NRG2|SRC|STAT3|SYNGAP1|TGFB1|TGFBR1|TLN1|UBB	370/43622 genes: 0,85%
Prolonged ERK activation events	REACT:R-HSA-169893	1.3e-23	2.31e-20	38	CNKSR1|CRK|CSF2|DUSP2|DUSP4|DUSP5|DUSP6|EGF|EGFR|EREG|FGF2|FGF20|FGFR2|FN1|GDNF|GRIN1|GRIN2A|GRIN2B|HGF|IQGAP1|ITGA2B|ITGB3|MAP3K11|MAPK1|MAPK3|MET|NEFL|NGF|NRG1|NRG2|RET|SHC3|SPTBN2|SRC|SYNGAP1|TEK|TLN1|UBB	252/43622 genes: 0,58%
GAB1 signalosome	REACT:R-HSA-180292	1.63e-23	2.88e-20	29	AKT1|CASP9|CD28|CD86|CDKN1A|CHUK|CREB1|EGF|EGFR|EREG|FGF2|FGF20|FGFR2|GSK3B|HGF|INS|INSR|LCK|MAPK1|MAPK3|MDM2|MET|MTOR|NRG1|NRG2|SRC|TNRC6A|TP53|TRIB3	128/43622 genes: 0,29%
Pertussis	KEGG:hsa05133	1.76e-23	3.11e-20	24	C4BPA|C5|CASP3|CXCL6|CXCL8|FOS|IL12A|IL12B|IL1A|IL1B|IL23A|IL6|ITGAM|JUN|MAPK1|MAPK11|MAPK14|MAPK3|MAPK8|MAPK9|NFKB1|NOS2|RELA|TNF	76/43622 genes: 0,17%
Metabolism of lipids and lipoproteins	REACT:R-HSA-556833	2.29e-23	4.05e-20	65	ACHE|ACOT2|ACSL3|AKR1B1|ALB|ANGPTL4|APOA2|ARNT|ARNTL|CCN2|CERS1|CERS6|CH25H|CHAT|CLOCK|CYP11A1|DPEP1|DPEP2|ELOVL6|FA2H|FADS2|FASN|FDPS|G0S2|GPX1|HDAC3|HILPDA|HMGCS2|HSD11B1|INSIG1|LCAT|LHB|LPCAT4|LPIN1|ME1|MTM1|MTMR6|NCOR2|NFYB|NPAS2|NR1D1|NRF1|PCSK9|PLA2G2A|PLA2G2D|PLA2R1|PLD2|PNLIP|PPARG|PPARGC1A|PRKAB2|PRKACA|PRKAG2|PRKD1|PTDSS2|PTGR1|PTGS2|RELN|SCD|SGMS2|SLC10A1|STAR|TBXAS1|TRIB3|TXNRD1	814/43622 genes: 1,87%
Toll Like Receptor 9 (TLR9) Cascade	REACT:R-HSA-168138	2.92e-23	5.17e-20	26	ATF1|ATF2|CHUK|CREB1|DUSP4|DUSP6|FOS|HMGB1|JUN|MAP2K3|MAP2K4|MAP3K7|MAPK1|MAPK11|MAPK14|MAPK3|MAPK8|MAPK9|MEF2C|NFKB1|NFKBIA|RELA|S100B|SAA1|TAB3|UBB	97/43622 genes: 0,22%
Downstream signaling events of B Cell Receptor (BCR)	REACT:R-HSA-1168372	3.19e-23	5.65e-20	34	AKT1|CASP9|CD28|CD86|CDKN1A|CHUK|CREB1|EGF|EGFR|EREG|FGF2|FGF20|FGFR2|GSK3B|HGF|INS|INSR|LCK|MAP3K7|MAPK1|MAPK3|MDM2|MET|MTOR|NFKB1|NFKBIA|NRG1|NRG2|RELA|SRC|TNRC6A|TP53|TRIB3|UBB	197/43622 genes: 0,45%
Platelet degranulation	REACT:R-HSA-114608	4.15e-23	7.35e-20	29	ALB|ALDOA|CTSW|EGF|FN1|HGF|HSPA5|IGF1|IGF2|ITGA2B|ITGB3|KNG1|LEFTY2|LHFPL2|PCDH7|PROS1|SELP|SERPINE1|SOD1|SYTL4|TAGLN2|TGFB1|TGFB2|TGFB3|THBS1|TLN1|VEGFA|VEGFC|VEGFD	132/43622 genes: 0,30%
Epstein-Barr virus infection	KEGG:hsa05169	5.32e-23	9.42e-20	34	AKT1|ATF2|BCL2|CCNA1|CD44|CDKN1A|CHUK|EIF2AK3|GSK3B|HDAC2|HDAC4|HLA-DRB4|ICAM1|IFNG|JUN|LYN|MAP2K3|MAP2K4|MAP3K7|MAPK11|MAPK14|MAPK8|MAPK9|MDM2|NCOR2|NFKB1|NFKBIA|PRKACA|RBPJL|RELA|STAT3|TP53|VIM|YWHAZ	200/43622 genes: 0,46%
Interleukin-2 signaling	REACT:R-HSA-451927	5.43e-23	9.62e-20	38	CNKSR1|CSF2|DUSP2|DUSP4|DUSP5|DUSP6|EGF|EGFR|EREG|FGF2|FGF20|FGFR2|FN1|GDNF|GRIN1|GRIN2A|GRIN2B|HGF|IQGAP1|ITGA2B|ITGB3|LCK|MAP3K11|MAPK1|MAPK3|MET|NEFL|NRG1|NRG2|PTK2B|RET|SHC3|SPTBN2|SRC|SYNGAP1|TEK|TLN1|UBB	262/43622 genes: 0,60%
Signalling to p38 via RIT and RIN	REACT:R-HSA-187706	8.52e-23	1.51e-19	37	CNKSR1|CSF2|DUSP2|DUSP4|DUSP5|DUSP6|EGF|EGFR|EREG|FGF2|FGF20|FGFR2|FN1|GDNF|GRIN1|GRIN2A|GRIN2B|HGF|IQGAP1|ITGA2B|ITGB3|MAP3K11|MAPK1|MAPK3|MET|NEFL|NGF|NRG1|NRG2|RET|SHC3|SPTBN2|SRC|SYNGAP1|TEK|TLN1|UBB	249/43622 genes: 0,57%
Legionellosis	KEGG:hsa05134	9.72e-23	1.72e-19	21	BNIP3|CASP3|CASP8|CASP9|CR1|CXCL1|CXCL2|CXCL3|CXCL8|CYCS|IL12A|IL12B|IL18|IL1B|IL6|ITGAM|NFKB1|NFKBIA|RELA|TLR5|TNF	55/43622 genes: 0,13%
Frs2-mediated activation	REACT:R-HSA-170968	9.84e-23	1.74e-19	37	CNKSR1|CSF2|DUSP2|DUSP4|DUSP5|DUSP6|EGF|EGFR|EREG|FGF2|FGF20|FGFR2|FN1|GDNF|GRIN1|GRIN2A|GRIN2B|HGF|IQGAP1|ITGA2B|ITGB3|MAP3K11|MAPK1|MAPK3|MET|NEFL|NGF|NRG1|NRG2|RET|SHC3|SPTBN2|SRC|SYNGAP1|TEK|TLN1|UBB	250/43622 genes: 0,57%
MAPK1/MAPK3 signaling	REACT:R-HSA-5684996	1.13e-22	2.01e-19	37	CNKSR1|CSF2|DUSP2|DUSP4|DUSP5|DUSP6|EGF|EGFR|EREG|FGF2|FGF20|FGFR2|FN1|GDNF|GRIN1|GRIN2A|GRIN2B|HGF|IL6|IQGAP1|ITGA2B|ITGB3|MAP3K11|MAPK1|MAPK3|MET|NEFL|NRG1|NRG2|RET|SHC3|SPTBN2|SRC|SYNGAP1|TEK|TLN1|UBB	251/43622 genes: 0,58%
Signaling by Leptin	REACT:R-HSA-2586552	1.51e-22	2.67e-19	37	CNKSR1|CSF2|DUSP2|DUSP4|DUSP5|DUSP6|EGF|EGFR|EREG|FGF2|FGF20|FGFR2|FN1|GDNF|GRIN1|GRIN2A|GRIN2B|HGF|IQGAP1|ITGA2B|ITGB3|MAP3K11|MAPK1|MAPK3|MET|NEFL|NRG1|NRG2|RET|SHC3|SPTBN2|SRC|STAT3|SYNGAP1|TEK|TLN1|UBB	253/43622 genes: 0,58%
RET signaling	REACT:R-HSA-8853659	1.62e-22	2.87e-19	38	CNKSR1|CSF2|DUSP2|DUSP4|DUSP5|DUSP6|EGF|EGFR|EREG|FGF2|FGF20|FGFR2|FN1|GDNF|GRIN1|GRIN2A|GRIN2B|HGF|IQGAP1|ITGA2B|ITGB3|MAP3K11|MAPK1|MAPK3|MET|NEFL|NRG1|NRG2|PRKACA|PRKCA|RET|SHC3|SPTBN2|SRC|SYNGAP1|TEK|TLN1|UBB	270/43622 genes: 0,62%
Generic Transcription Pathway	REACT:R-HSA-212436	2.03e-22	3.59e-19	66	AKT1|ARID3A|ATF2|ATM|BAX|BID|BIRC5|CASP2|CCN2|CCNA1|CCNG1|CDKN1A|CDKN2B|CGB3|CITED1|CNOT2|CNOT6L|CYCS|EGFR|ESR1|FAS|FOS|GADD45A|GSR|GTF2H1|HDAC2|JUN|MAPK11|MAPK14|MDM2|MTOR|NCOR2|NEDD4L|NOTCH4|NPPA|NR1D1|NR1D2|NR6A1|NUAK1|PARP1|PMAIP1|PPARG|PRKAB2|PRKAG2|RFC5|RRAGB|RUNX2|SERPINE1|SESN2|SGK1|SMAD7|TAF4B|TAF7L|TAF9B|TFAP2B|TGFA|TNRC6A|TP53|TP73|TXNRD1|UBB|VEGFA|WWOX|YWHAZ|ZNF224|ZNF761	873/43622 genes: 2,00%
NF-kappa B signaling pathway	KEGG:hsa04064	2.51e-22	4.45e-19	25	ATM|BCL2|BCL2L1|CARD14|CCL19|CFLAR|CHUK|CXCL12|CXCL2|CXCL8|ICAM1|IL1B|IL1R1|LCK|LYN|MAP3K7|NFKB1|NFKBIA|PARP1|PRKCQ|PTGS2|RELA|TAB3|TNF|VCAM1	94/43622 genes: 0,22%
GRB2 events in EGFR signaling	REACT:R-HSA-179812	4.79e-22	8.48e-19	36	CNKSR1|CSF2|DUSP2|DUSP4|DUSP5|DUSP6|EGF|EGFR|EREG|FGF2|FGF20|FGFR2|FN1|GDNF|GRIN1|GRIN2A|GRIN2B|HGF|IQGAP1|ITGA2B|ITGB3|MAP3K11|MAPK1|MAPK3|MET|NEFL|NRG1|NRG2|RET|SHC3|SPTBN2|SRC|SYNGAP1|TEK|TLN1|UBB	245/43622 genes: 0,56%
RAF/MAP kinase cascade	REACT:R-HSA-5673001	4.79e-22	8.48e-19	36	CNKSR1|CSF2|DUSP2|DUSP4|DUSP5|DUSP6|EGF|EGFR|EREG|FGF2|FGF20|FGFR2|FN1|GDNF|GRIN1|GRIN2A|GRIN2B|HGF|IQGAP1|ITGA2B|ITGB3|MAP3K11|MAPK1|MAPK3|MET|NEFL|NRG1|NRG2|RET|SHC3|SPTBN2|SRC|SYNGAP1|TEK|TLN1|UBB	245/43622 genes: 0,56%
SHC1 events in EGFR signaling	REACT:R-HSA-180336	4.79e-22	8.48e-19	36	CNKSR1|CSF2|DUSP2|DUSP4|DUSP5|DUSP6|EGF|EGFR|EREG|FGF2|FGF20|FGFR2|FN1|GDNF|GRIN1|GRIN2A|GRIN2B|HGF|IQGAP1|ITGA2B|ITGB3|MAP3K11|MAPK1|MAPK3|MET|NEFL|NRG1|NRG2|RET|SHC3|SPTBN2|SRC|SYNGAP1|TEK|TLN1|UBB	245/43622 genes: 0,56%
SOS-mediated signalling	REACT:R-HSA-112412	4.79e-22	8.48e-19	36	CNKSR1|CSF2|DUSP2|DUSP4|DUSP5|DUSP6|EGF|EGFR|EREG|FGF2|FGF20|FGFR2|FN1|GDNF|GRIN1|GRIN2A|GRIN2B|HGF|IQGAP1|ITGA2B|ITGB3|MAP3K11|MAPK1|MAPK3|MET|NEFL|NRG1|NRG2|RET|SHC3|SPTBN2|SRC|SYNGAP1|TEK|TLN1|UBB	245/43622 genes: 0,56%
Salmonella infection	KEGG:hsa05132	4.88e-22	8.64e-19	24	ACTB|CSF2|CXCL1|CXCL2|CXCL3|CXCL8|FOS|IFNG|IL18|IL1A|IL1B|IL6|JUN|MAPK1|MAPK11|MAPK14|MAPK3|MAPK8|MAPK9|NFKB1|NOS2|RELA|TLR5|WASF2	86/43622 genes: 0,20%
MicroRNAs in cancer	KEGG:hsa05206	7.44e-22	1.32e-18	39	APC|ATM|BCL2|BCL2L11|BMF|CASP3|CCNG1|CD44|CDKN1A|CRK|EGFR|HDAC4|HMOX1|ITGB3|MAPK1|MCL1|MDM2|MET|MIR107|MIR125B1|MIR15A|MIR29A|MIRLET7B|MIRLET7E|MMP9|MTOR|NFKB1|NOTCH4|PRKCA|PTGS2|SLC7A1|SOCS1|STAT3|TGFB2|THBS1|TNN|TP53|VEGFA|VIM	299/43622 genes: 0,69%
Signaling by the B Cell Receptor (BCR)	REACT:R-HSA-983705	9.89e-22	1.75e-18	35	AKT1|CASP9|CD28|CD86|CDKN1A|CHUK|CREB1|EGF|EGFR|EREG|FGF2|FGF20|FGFR2|GSK3B|HGF|INS|INSR|LCK|LYN|MAP3K7|MAPK1|MAPK3|MDM2|MET|MTOR|NFKB1|NFKBIA|NRG1|NRG2|RELA|SRC|TNRC6A|TP53|TRIB3|UBB	234/43622 genes: 0,54%
Interleukin receptor SHC signaling	REACT:R-HSA-912526	1.91e-21	3.38e-18	36	CNKSR1|CSF2|DUSP2|DUSP4|DUSP5|DUSP6|EGF|EGFR|EREG|FGF2|FGF20|FGFR2|FN1|GDNF|GRIN1|GRIN2A|GRIN2B|HGF|IQGAP1|ITGA2B|ITGB3|MAP3K11|MAPK1|MAPK3|MET|NEFL|NRG1|NRG2|RET|SHC3|SPTBN2|SRC|SYNGAP1|TEK|TLN1|UBB	255/43622 genes: 0,58%
MAP kinase activation in TLR cascade	REACT:R-HSA-450294	4.08e-21	7.22e-18	21	ATF1|ATF2|CHUK|CREB1|DUSP4|DUSP6|FOS|JUN|MAP2K3|MAP2K4|MAP3K7|MAPK1|MAPK11|MAPK14|MAPK3|MAPK8|MAPK9|MEF2C|NFKB1|TAB3|UBB	64/43622 genes: 0,15%
Pancreatic cancer	KEGG:hsa05212	4.08e-21	7.22e-18	21	AKT1|ARHGEF6|BCL2L1|CASP9|CHUK|EGF|EGFR|MAPK1|MAPK3|MAPK8|MAPK9|NFKB1|RELA|STAT3|TGFA|TGFB1|TGFB2|TGFB3|TGFBR1|TP53|VEGFA	64/43622 genes: 0,15%
Chemokine signaling pathway	KEGG:hsa04062	4.08e-21	7.23e-18	31	ADCY6|AKT1|CCL17|CCL19|CCL2|CCL5|CCL7|CHUK|CRK|CX3CL1|CXCL1|CXCL10|CXCL12|CXCL2|CXCL3|CXCL6|CXCL8|GNB4|GSK3B|LYN|MAPK1|MAPK3|NFKB1|NFKBIA|PRKACA|PRKCD|PTK2B|RELA|SHC3|SRC|STAT3	182/43622 genes: 0,42%
Transcriptional Regulation by TP53	REACT:R-HSA-3700989	4.29e-21	7.6e-18	42	AKT1|ARID3A|ATF2|ATM|BAX|BID|BIRC5|CASP2|CCNA1|CCNG1|CDKN1A|CNOT2|CNOT6L|CYCS|FAS|FOS|GADD45A|GSR|GTF2H1|HDAC2|JUN|MAPK11|MAPK14|MDM2|MTOR|NUAK1|PMAIP1|PRKAB2|PRKAG2|RFC5|RRAGB|SESN2|SGK1|TAF4B|TAF7L|TAF9B|TNRC6A|TP53|TP73|TXNRD1|UBB|YWHAZ	370/43622 genes: 0,85%
Amoebiasis	KEGG:hsa05146	6.6e-21	1.17e-17	24	ARG1|CASP3|COL4A5|CSF2|CXCL1|CXCL8|FN1|IFNG|IL12A|IL12B|IL1B|IL1R1|IL1R2|IL6|ITGAM|NFKB1|NOS2|PRKACA|PRKCA|RELA|TGFB1|TGFB2|TGFB3|TNF	95/43622 genes: 0,22%
Malaria	KEGG:hsa05144	7.45e-21	1.32e-17	19	CCL2|CR1|CSF3|CXCL8|HGF|ICAM1|IFNG|IL12A|IL18|IL1B|IL6|MET|SELP|TGFB1|TGFB2|TGFB3|THBS1|TNF|VCAM1	49/43622 genes: 0,11%
Breast cancer	KEGG:hsa05224	7.98e-21	1.41e-17	28	AKT1|APC|AXIN2|CDKN1A|CTNNB1|DLL4|EGF|EGFR|ESR1|FGF2|FGF20|FOS|GSK3B|HEY1|IGF1|IGF1R|JUN|MAPK1|MAPK3|MTOR|NOTCH4|RPS6KB1|SHC3|TP53|WNT10B|WNT11|WNT6|WNT7B	144/43622 genes: 0,33%
Th17 cell differentiation	KEGG:hsa04659	8.18e-21	1.45e-17	25	CHUK|FOS|HIF1A|HLA-DRB4|IFNG|IL1B|IL1R1|IL23A|IL6|JUN|LCK|MAPK1|MAPK11|MAPK14|MAPK3|MAPK8|MAPK9|MTOR|NFKB1|NFKBIA|PRKCQ|RELA|STAT3|TGFB1|TGFBR1	107/43622 genes: 0,25%
ErbB signaling pathway	KEGG:hsa04012	1.04e-20	1.84e-17	23	AKT1|AREG|CDKN1A|CRK|EGF|EGFR|EIF4EBP1|EREG|GSK3B|JUN|MAP2K4|MAPK1|MAPK3|MAPK8|MAPK9|MTOR|NRG1|NRG2|PRKCA|RPS6KB1|SHC3|SRC|TGFA	86/43622 genes: 0,20%
Epithelial cell signaling in Helicobacter pylori infection	KEGG:hsa05120	1.74e-20	3.08e-17	21	ATP6V1A|ATP6V1E2|CASP3|CCL5|CHUK|CXCL1|CXCL8|EGFR|JUN|LYN|MAP2K4|MAPK11|MAPK14|MAPK8|MAPK9|MET|NFKB1|NFKBIA|PTPRZ1|RELA|SRC	68/43622 genes: 0,16%
Prolactin signaling pathway	KEGG:hsa04917	3.45e-20	6.11e-17	21	AKT1|CISH|ESR1|FOS|GSK3B|INS|LHB|MAPK1|MAPK11|MAPK14|MAPK3|MAPK8|MAPK9|NFKB1|PRL|RELA|SHC3|SOCS1|SRC|STAT3|TH	70/43622 genes: 0,16%
Regulation of actin cytoskeleton	KEGG:hsa04810	4.17e-20	7.39e-17	32	ABI2|ACTB|APC|ARHGEF4|ARHGEF6|ARHGEF7|BDKRB2|CRK|EGF|EGFR|FGF2|FGF20|FGFR2|FN1|INS|IQGAP1|ITGA10|ITGA2B|ITGA3|ITGA8|ITGAM|ITGAV|ITGB3|ITGB5|ITGB6|MAPK1|MAPK3|MYLK2|MYLK3|PDGFC|SRC|WASF2	212/43622 genes: 0,49%
cAMP signaling pathway	KEGG:hsa04024	5.34e-20	9.46e-17	31	ADCY6|ADORA2A|AKT1|ATP2B2|ATP2B4|BDNF|CFTR|CREB1|DRD1|DRD2|FOS|FSHB|FXYD2|GABBR2|GRIN1|GRIN2A|GRIN2B|JUN|MAPK1|MAPK3|MAPK8|MAPK9|NFKB1|NFKBIA|NPR1|PLCE1|PLD2|PLN|PPP1R1B|PRKACA|RELA	198/43622 genes: 0,45%
Autophagy - animal	KEGG:hsa04140	6.11e-20	1.08e-16	26	AKT1|BCL2|BCL2L1|BECN1|BNIP3|CAMKK2|CFLAR|CTSD|EIF2AK3|EIF2S1|ERN1|HIF1A|HMGB1|IGF1R|INS|MAP3K7|MAPK1|MAPK3|MAPK8|MAPK9|MTOR|PRKACA|PRKCD|PRKCQ|RPS6KB1|RRAGB	128/43622 genes: 0,29%
Viral carcinogenesis	KEGG:hsa05203	8.41e-20	1.49e-16	31	ATF2|ATF4|BAX|CASP3|CASP8|CCNA1|CDKN1A|CDKN2B|CREB1|EGR2|EGR3|GTF2H1|H2BU1|HDAC2|HDAC3|HDAC4|JUN|LYN|MAPK1|MAPK3|MDM2|NFKB1|NFKBIA|PMAIP1|PRKACA|RBPJL|RELA|SRC|STAT3|TP53|YWHAZ	201/43622 genes: 0,46%
Apoptosis - multiple species	KEGG:hsa04215	1.03e-19	1.82e-16	16	BAX|BCL2|BCL2L1|BCL2L11|BECN1|BID|BIRC5|BIRC7|CASP3|CASP8|CASP9|CYCS|MAPK8|MAPK9|NGFR|PMAIP1	33/43622 genes: 0,08%
Apelin signaling pathway	KEGG:hsa04371	4.5e-19	7.97e-16	26	ACTA2|ADCY6|AKT1|BECN1|CCN2|EGR1|GNB4|HDAC4|KLF2|MAPK1|MAPK3|MEF2C|MTOR|MYLK2|MYLK3|NOS1|NOS2|NOS3|NRF1|PPARGC1A|PRKAB2|PRKACA|PRKAG2|RPS6KB1|SERPINE1|TGFBR1	138/43622 genes: 0,32%
p53 signaling pathway	KEGG:hsa04115	5.86e-19	1.04e-15	20	ATM|BAX|BID|CASP3|CASP8|CASP9|CCNB2|CCNG1|CDKN1A|CYCS|FAS|GADD45A|IGF1|MDM2|PMAIP1|SERPINE1|SESN2|THBS1|TP53|TP73	69/43622 genes: 0,16%
GnRH signaling pathway	KEGG:hsa04912	1.02e-18	1.81e-15	22	ADCY6|ATF4|EGFR|FSHB|GNRH1|JUN|LHB|MAP2K3|MAP2K4|MAPK1|MAPK11|MAPK14|MAPK3|MAPK8|MAPK9|MMP14|PLD2|PRKACA|PRKCA|PRKCD|PTK2B|SRC	92/43622 genes: 0,21%
Thyroid hormone signaling pathway	KEGG:hsa04919	1.04e-18	1.84e-15	24	ACTB|AKT1|BMP4|CASP9|CTNNB1|ESR1|FXYD2|GSK3B|HDAC2|HDAC3|HIF1A|ITGAV|ITGB3|MAPK1|MAPK3|MDM2|MTOR|NOTCH4|PLCE1|PLN|PRKACA|PRKCA|SRC|TP53	116/43622 genes: 0,27%
Dopaminergic synapse	KEGG:hsa04728	1.28e-18	2.27e-15	25	AKT1|ARNTL|ATF2|ATF4|CALY|CLOCK|CREB1|DRD1|DRD2|FOS|GNB4|GRIN2A|GRIN2B|GSK3B|KCNJ3|KIF5C|MAPK11|MAPK14|MAPK8|MAPK9|PPP1R1B|PRKACA|PRKCA|SLC6A3|TH	130/43622 genes: 0,30%
Hepatitis C	KEGG:hsa05160	1.56e-18	2.76e-15	25	AKT1|CDKN1A|CHUK|CLDN23|CLDN4|CLDN9|CXCL8|EGF|EGFR|EIF2AK3|EIF2S1|GSK3B|MAPK1|MAPK11|MAPK14|MAPK3|MAPK8|MAPK9|NFKB1|NFKBIA|PIAS1|RELA|STAT3|TNF|TP53	131/43622 genes: 0,30%
Mitophagy - animal	KEGG:hsa04137	3.72e-18	6.58e-15	19	ATF4|BCL2L1|BECN1|BNIP3|CALCOCO2|EIF2AK3|HIF1A|JUN|MAPK8|MAPK9|MFN2|PINK1|PRKN|RELA|SQSTM1|SRC|TP53|UBB|USP15	65/43622 genes: 0,15%
Post-translational protein modification	REACT:R-HSA-597592	6.57e-18	1.16e-14	65	ACTB|ADAMTS1|ADAMTS5|ANKRD28|APC|AREG|AXIN2|BECN1|BIRC5|CCNA1|CFTR|CHML|CHST10|CNTN4|COL7A1|COPG2|CPM|DPH1|ESR1|H2BU1|HIF1A|INS|KEAP1|LHB|LMAN2|LYPD6B|MAP3K7|MDM2|MGAT1|MTA1|NFKBIA|NSF|NTM|NUP210|PARP1|PIAS1|PRKN|PRND|PROC|PROS1|RAB20|RAB21|RAB23|RAB25|RAB3A|SIAH2|SMAD7|SPON1|SPTBN2|ST6GAL1|TAF9B|TEX101|TFAP2B|TGFA|TGFB1|TGFBR1|THBS1|TP53|UAP1|UBA1|UBB|UCHL1|USP15|USP18|VNN3	1037/43622 genes: 2,38%
Transmission across Chemical Synapses	REACT:R-HSA-112315	7.76e-18	1.37e-14	30	ACHE|ADCY6|CHAT|CHRNA7|CREB1|GABBR2|GABRA1|GABRB3|GABRG2|GAD1|GLUL|GNB4|GRIK3|GRIN1|GRIN2A|GRIN2B|KCNJ3|MAPK1|MDM2|NEFL|NSF|PRKACA|PRKCA|RAB3A|SLC1A2|SLC1A3|SLC22A1|SLC5A7|SLC6A1|SLC6A3	217/43622 genes: 0,50%
PI3K/AKT Signaling in Cancer	REACT:R-HSA-2219528	1.08e-17	1.92e-14	21	AKT1|CASP9|CD28|CD86|CDKN1A|CHUK|CREB1|EGF|EGFR|EREG|FGF2|FGF20|FGFR2|GSK3B|HGF|LCK|MDM2|MET|MTOR|NRG1|NRG2	90/43622 genes: 0,21%
Apoptosis	REACT:R-HSA-109581	1.26e-17	2.23e-14	27	AKT1|APC|BAX|BCL2|BCL2L1|BCL2L11|BID|BMF|CASP3|CASP8|CASP9|CFLAR|CTNNB1|CYCS|FAS|FASLG|HMGB1|MAPK8|MAPT|PMAIP1|PRKCD|PRKCQ|TP53|TP73|UBB|VIM|YWHAZ	172/43622 genes: 0,39%
Programmed Cell Death	REACT:R-HSA-5357801	1.99e-17	3.52e-14	27	AKT1|APC|BAX|BCL2|BCL2L1|BCL2L11|BID|BMF|CASP3|CASP8|CASP9|CFLAR|CTNNB1|CYCS|FAS|FASLG|HMGB1|MAPK8|MAPT|PMAIP1|PRKCD|PRKCQ|TP53|TP73|UBB|VIM|YWHAZ	175/43622 genes: 0,40%
Sphingolipid signaling pathway	KEGG:hsa04071	2.23e-17	3.96e-14	23	AKT1|BAX|BCL2|BDKRB2|BID|CERS1|CERS6|CTSD|MAPK1|MAPK11|MAPK14|MAPK3|MAPK8|MAPK9|NFKB1|NOS3|PLD2|PRKCA|RELA|S1PR1|SGMS2|TNF|TP53	118/43622 genes: 0,27%
Intrinsic Pathway for Apoptosis	REACT:R-HSA-109606	3.06e-17	5.41e-14	16	AKT1|BAX|BCL2|BCL2L1|BCL2L11|BID|BMF|CASP3|CASP8|CASP9|CYCS|MAPK8|PMAIP1|TP53|TP73|YWHAZ	44/43622 genes: 0,10%
Insulin resistance	KEGG:hsa04931	3.32e-17	5.88e-14	22	AKT1|CREB1|GSK3B|IL6|INS|INSR|MAPK8|MAPK9|MTOR|NFKB1|NFKBIA|NOS3|PPARGC1A|PRKAB2|PRKAG2|PRKCD|PRKCQ|RELA|RPS6KB1|STAT3|TNF|TRIB3	107/43622 genes: 0,25%
Cellular Senescence	REACT:R-HSA-2559583	4.04e-17	7.16e-14	28	ATM|CCNA1|CDKN1A|CDKN2B|CDKN2C|CXCL8|FOS|H2BU1|H3C1|ID1|IL1A|IL6|JUN|MAP2K3|MAP2K4|MAPK1|MAPK11|MAPK14|MAPK3|MAPK8|MAPK9|MDM2|NFKB1|RELA|STAT3|TNRC6A|TP53|UBB	196/43622 genes: 0,45%
Alcoholism	KEGG:hsa05034	4.15e-17	7.36e-14	27	ADORA2A|ATF2|ATF4|BDNF|CAMKK2|CREB1|DRD1|DRD2|GNB4|GRIN1|GRIN2A|GRIN2B|H2BU1|H3C1|HAT1|HDAC2|HDAC3|HDAC4|MAPK1|MAPK3|NTRK2|PPP1R1B|PRKACA|SHC3|SLC29A1|SLC6A3|TH	180/43622 genes: 0,41%
Small cell lung cancer	KEGG:hsa05222	4.22e-17	7.47e-14	20	AKT1|BCL2|BCL2L1|BIRC7|CASP9|CDKN2B|CHUK|CKS2|COL4A5|CYCS|FN1|ITGA2B|ITGA3|ITGAV|NFKB1|NFKBIA|NOS2|PTGS2|RELA|TP53	84/43622 genes: 0,19%
GPCR ligand binding	REACT:R-HSA-500792	5.1e-17	9.03e-14	41	ADM|ADORA2A|BDKRB2|C5|CCL19|CCL5|CX3CL1|CXCL1|CXCL10|CXCL12|CXCL2|CXCL3|CXCL6|CXCL8|DRD1|DRD2|EDN1|F2RL1|FSHB|GABBR2|GAL|GCGR|GNB4|GNRH1|GPR18|HRH1|KISS1R|KNG1|LHB|LPAR1|MCHR1|PTHLH|PYY|S1PR1|SAA1|TACR1|TACR2|WNT10B|WNT11|WNT6|WNT7B	454/43622 genes: 1,04%
mTOR signaling pathway	KEGG:hsa04150	5.45e-17	9.65e-14	25	AKT1|ATP6V1A|ATP6V1E2|CHUK|EIF4EBP1|FLCN|GSK3B|IGF1|IGF1R|INS|INSR|LPIN1|MAPK1|MAPK3|MTOR|PRKCA|RPS6KB1|RRAGB|SESN2|SGK1|TNF|WNT10B|WNT11|WNT6|WNT7B	151/43622 genes: 0,35%
p75 NTR receptor-mediated signalling	REACT:R-HSA-193704	5.65e-17	1e-13	21	ARHGDIA|ARHGEF10|ARHGEF16|ARHGEF4|ARHGEF6|ARHGEF7|BCL2L11|CASP2|CASP3|HDAC2|HDAC3|MAPK8|MCF2L|NFKB1|NFKBIA|NGF|NGFR|RELA|RTN4|SQSTM1|UBB	97/43622 genes: 0,22%
Neuronal System	REACT:R-HSA-112316	6.39e-17	1.13e-13	36	ACHE|ADCY6|CHAT|CHRNA7|CREB1|GABBR2|GABRA1|GABRB3|GABRG2|GAD1|GLUL|GNB4|GRIK3|GRIN1|GRIN2A|GRIN2B|KCNG1|KCNH4|KCNH6|KCNJ3|KCNQ1|KCNQ2|MAPK1|MDM2|NEFL|NSF|PRKACA|PRKCA|PTPRD|RAB3A|SLC1A2|SLC1A3|SLC22A1|SLC5A7|SLC6A1|SLC6A3	349/43622 genes: 0,80%
MAPK targets/ Nuclear events mediated by MAP kinases	REACT:R-HSA-450282	7.4e-17	1.31e-13	14	ATF1|ATF2|CREB1|DUSP4|DUSP6|FOS|JUN|MAPK1|MAPK11|MAPK14|MAPK3|MAPK8|MAPK9|MEF2C	31/43622 genes: 0,07%
Inflammatory bowel disease (IBD)	KEGG:hsa05321	8.34e-17	1.48e-13	18	HLA-DRB4|IFNG|IL12A|IL12B|IL18|IL1A|IL1B|IL23A|IL6|JUN|NFKB1|RELA|STAT3|TGFB1|TGFB2|TGFB3|TLR5|TNF	65/43622 genes: 0,15%
Renal cell carcinoma	KEGG:hsa05211	8.34e-17	1.48e-13	18	AKT1|ARNT|CRK|EGLN3|EPAS1|FLCN|HGF|HIF1A|JUN|MAPK1|MAPK3|MET|TGFA|TGFB1|TGFB2|TGFB3|VEGFA|VHL	65/43622 genes: 0,15%
Signaling pathways regulating pluripotency of stem cells	KEGG:hsa04550	8.45e-17	1.5e-13	24	AKT1|APC|AXIN2|BMP4|CTNNB1|FGF2|FGFR2|GSK3B|ID1|ID2|IGF1|IGF1R|KLF4|LEFTY2|LIF|MAPK1|MAPK11|MAPK14|MAPK3|STAT3|WNT10B|WNT11|WNT6|WNT7B	139/43622 genes: 0,32%
Hippo signaling pathway	KEGG:hsa04390	8.84e-17	1.57e-13	25	ACTB|AFP|APC|AREG|AXIN2|BIRC5|BMP4|CCN2|CTNNA1|CTNNB1|GSK3B|ID1|ID2|SERPINE1|SMAD7|TGFB1|TGFB2|TGFB3|TGFBR1|TP73|WNT10B|WNT11|WNT6|WNT7B|YWHAZ	154/43622 genes: 0,35%
Alzheimer's disease	KEGG:hsa05010	1.13e-16	2e-13	26	ATF6|ATP2A3|BID|CASP12|CASP3|CASP8|CASP9|COX6A2|CYCS|EIF2AK3|ERN1|FAS|GAPDH|GRIN1|GRIN2A|GRIN2B|GSK3B|IL1B|MAPK1|MAPK3|MAPT|NOS1|RTN4|SDHA|SNCA|TNF	171/43622 genes: 0,39%
Gene Expression	REACT:R-HSA-74160	1.32e-16	2.35e-13	88	ACTB|AKT1|ARID3A|ATF2|ATM|BAX|BID|BIRC5|CASP2|CCN2|CCNA1|CCNG1|CDKN1A|CDKN2B|CGB3|CITED1|CNOT2|CNOT6L|CSTF2|CYCS|DCP1B|EAF2|EGFR|EIF2S1|EIF4EBP1|ESR1|FAS|FOS|GADD45A|GCFC2|GSK3B|GSPT2|GSR|GTF2H1|H2BU1|H3C1|HDAC2|INTS2|JUN|MAPK11|MAPK14|MAPK3|MDM2|MTA1|MTOR|NCOR2|NEDD4L|NFIB|NFIX|NOL6|NOTCH4|NPPA|NR1D1|NR1D2|NR6A1|NUAK1|NUP210|PARP1|PMAIP1|PPARG|PRKAB2|PRKAG2|PRKCA|PRKCD|RFC5|RPP38|RPS23|RRAGB|RUN…	1831/43622 genes: 4,20%
T cell receptor signaling pathway	KEGG:hsa04660	2.08e-16	3.69e-13	21	AKT1|CD28|CD8B|CHUK|CSF2|FOS|GSK3B|IFNG|JUN|LCK|MAP3K7|MAPK1|MAPK11|MAPK14|MAPK3|MAPK9|NFKB1|NFKBIA|PRKCQ|RELA|TNF	103/43622 genes: 0,24%
Cocaine addiction	KEGG:hsa05030	2.26e-16	4e-13	16	ATF2|ATF4|BDNF|CREB1|DRD1|DRD2|GRIN1|GRIN2A|GRIN2B|JUN|NFKB1|PPP1R1B|PRKACA|RELA|SLC6A3|TH	49/43622 genes: 0,11%
Th1 and Th2 cell differentiation	KEGG:hsa04658	2.86e-16	5.07e-13	20	CHUK|DLL4|FOS|HLA-DRB4|IFNG|IL12A|IL12B|JUN|LCK|MAPK1|MAPK11|MAPK14|MAPK3|MAPK8|MAPK9|NFKB1|NFKBIA|PRKCQ|RBPJL|RELA	92/43622 genes: 0,21%
Measles	KEGG:hsa05162	3.57e-16	6.33e-13	23	AKT1|CD28|CHUK|EIF2AK3|EIF2S1|FAS|FASLG|GSK3B|IFNG|IL12A|IL12B|IL1A|IL1B|IL6|MAP3K7|NFKB1|NFKBIA|PRKCQ|RELA|STAT3|TACR1|TP53|TP73	133/43622 genes: 0,30%
African trypanosomiasis	KEGG:hsa05143	3.69e-16	6.54e-13	14	APOL1|F2RL1|FAS|FASLG|ICAM1|IFNG|IL12A|IL12B|IL18|IL1B|IL6|PRKCA|TNF|VCAM1	34/43622 genes: 0,08%
Negative regulation of the PI3K/AKT network	REACT:R-HSA-199418	4.48e-16	7.94e-13	20	AKT1|CD28|CD86|EGF|EGFR|EREG|FGF2|FGF20|FGFR2|HGF|INS|INSR|LCK|MAPK1|MAPK3|MET|NRG1|NRG2|SRC|TRIB3	94/43622 genes: 0,22%
Chronic myeloid leukemia	KEGG:hsa05220	4.7e-16	8.33e-13	18	AKT1|BCL2L1|CDKN1A|CHUK|CRK|HDAC2|MAPK1|MAPK3|MDM2|NFKB1|NFKBIA|RELA|SHC3|TGFB1|TGFB2|TGFB3|TGFBR1|TP53	71/43622 genes: 0,16%
Circadian Clock	REACT:R-HSA-400253	4.7e-16	8.33e-13	18	ARNTL|ATF2|BHLHE40|CLOCK|CREB1|CRY1|DBP|HDAC3|HIF1A|MEF2C|NAMPT|NPAS2|NR1D1|PER1|PER2|PPARGC1A|SERPINE1|UBB	71/43622 genes: 0,16%
Vesicle-mediated transport	REACT:R-HSA-5653656	5.58e-16	9.89e-13	48	AKT1|ALB|ANKRD28|APOL1|AREG|BLOC1S3|CFTR|CHML|COL7A1|COLEC12|COPG2|EGF|EGFR|EXOC6|FTH1|FTL|GJA1|GJA5|GJA8|GJB5|HPX|HSP90B1|IGF2R|INS|KIF3B|LMAN2|LRP2|MASP1|MYH13|MYH2|NSF|PRKAB2|PRKAG2|RAB21|RAB3A|RABGAP1|RIN2|SAA1|SCARA5|SORT1|SPTBN2|SRC|STX16|TACR1|TFRC|TGFA|UBB|YWHAZ	659/43622 genes: 1,51%
Hypertrophic cardiomyopathy (HCM)	KEGG:hsa05410	5.68e-16	1.01e-12	19	ACE|ACTB|IGF1|IL6|ITGA10|ITGA2B|ITGA3|ITGA8|ITGAV|ITGB3|ITGB5|ITGB6|PRKAB2|PRKAG2|TGFB1|TGFB2|TGFB3|TNF|TNNC1	83/43622 genes: 0,19%
Prion diseases	KEGG:hsa05020	6.05e-16	1.07e-12	14	BAX|C5|CASP12|CCL5|EGR1|HSPA5|IL1A|IL1B|IL6|MAPK1|MAPK3|PRKACA|PRNP|SOD1	35/43622 genes: 0,08%
Estrogen signaling pathway	KEGG:hsa04915	1.06e-15	1.88e-12	20	ADCY6|AKT1|ATF2|ATF4|CREB1|EGFR|ESR1|FOS|GABBR2|HSP90B1|JUN|KCNJ3|MAPK1|MAPK3|MMP9|NOS3|PRKACA|PRKCD|SHC3|SRC	98/43622 genes: 0,22%
PI5P, PP2A and IER3 Regulate PI3K/AKT Signaling	REACT:R-HSA-6811558	1.45e-15	2.57e-12	19	AKT1|CD28|CD86|EGF|EGFR|EREG|FGF2|FGF20|FGFR2|HGF|INS|INSR|LCK|MAPK1|MAPK3|MET|NRG1|NRG2|SRC	87/43622 genes: 0,20%
Activation of the AP-1 family of transcription factors	REACT:R-HSA-450341	1.99e-15	3.53e-12	9	ATF2|FOS|JUN|MAPK1|MAPK11|MAPK14|MAPK3|MAPK8|MAPK9	10/43622 genes: 0,02%
Integrin cell surface interactions	REACT:R-HSA-216083	3.97e-15	7.03e-12	17	CD44|COL18A1|FBN1|FN1|ICAM1|ITGA10|ITGA2B|ITGA3|ITGA8|ITGAM|ITGAV|ITGB3|ITGB5|ITGB6|MADCAM1|THBS1|VCAM1	68/43622 genes: 0,16%
BMAL1:CLOCK,NPAS2 activates circadian gene expression	REACT:R-HSA-1368108	4.15e-15	7.35e-12	15	ARNTL|BHLHE40|CLOCK|CREB1|CRY1|DBP|HDAC3|HIF1A|NAMPT|NPAS2|NR1D1|PER1|PER2|PPARGC1A|SERPINE1	48/43622 genes: 0,11%
Adipocytokine signaling pathway	KEGG:hsa04920	5.18e-15	9.17e-12	17	ACSL3|ADIPOQ|AKT1|CAMKK2|CHUK|MAPK8|MAPK9|MTOR|NFKB1|NFKBIA|PPARGC1A|PRKAB2|PRKAG2|PRKCQ|RELA|STAT3|TNF	69/43622 genes: 0,16%
AMPK signaling pathway	KEGG:hsa04152	5.37e-15	9.52e-12	21	ADIPOQ|AKT1|CAMKK2|CCNA1|CFTR|CREB1|EIF4EBP1|FASN|FBP2|IGF1|IGF1R|INS|INSR|MAP3K7|MTOR|PPARG|PPARGC1A|PRKAB2|PRKAG2|RPS6KB1|SCD	120/43622 genes: 0,28%
Class A/1 (Rhodopsin-like receptors)	REACT:R-HSA-373076	9.84e-15	1.74e-11	32	ADORA2A|BDKRB2|C5|CCL19|CCL5|CX3CL1|CXCL1|CXCL10|CXCL12|CXCL2|CXCL3|CXCL6|CXCL8|DRD1|DRD2|EDN1|F2RL1|FSHB|GAL|GNRH1|GPR18|HRH1|KISS1R|KNG1|LHB|LPAR1|MCHR1|PYY|S1PR1|SAA1|TACR1|TACR2	322/43622 genes: 0,74%
Hematopoietic cell lineage	KEGG:hsa04640	1e-14	1.77e-11	19	CD44|CD8B|CR1|CSF2|CSF3|FCGR1A|HLA-DRB4|IL1A|IL1B|IL1R1|IL1R2|IL6|IL7|ITGA2B|ITGA3|ITGAM|ITGB3|TFRC|TNF	96/43622 genes: 0,22%
Inflammatory mediator regulation of TRP channels	KEGG:hsa04750	1.22e-14	2.17e-11	19	ADCY6|BDKRB2|F2RL1|HRH1|IGF1|IL1B|IL1R1|MAP2K3|MAPK11|MAPK14|MAPK8|MAPK9|NGF|PRKACA|PRKCA|PRKCD|PRKCQ|SRC|TRPV3	97/43622 genes: 0,22%
Longevity regulating pathway - multiple species	KEGG:hsa04213	1.48e-14	2.62e-11	16	ADCY6|AKT1|CAT|CRYAB|HDAC2|IGF1|IGF1R|INS|INSR|MTOR|PRKAB2|PRKACA|PRKAG2|RPS6KB1|SOD1|SOD2	62/43622 genes: 0,14%
SLC-mediated transmembrane transport	REACT:R-HSA-425407	1.6e-14	2.84e-11	30	ALB|HEPH|NUP210|SLC11A1|SLC11A2|SLC16A3|SLC1A2|SLC1A3|SLC22A1|SLC22A15|SLC24A3|SLC26A4|SLC29A1|SLC2A12|SLC2A13|SLC31A1|SLC38A3|SLC38A4|SLC39A14|SLC39A8|SLC40A1|SLC4A10|SLC5A7|SLC6A1|SLC6A3|SLC7A1|SLC7A11|SLC7A3|SLCO3A1|SLCO4A1	286/43622 genes: 0,66%
Choline metabolism in cancer	KEGG:hsa05231	1.82e-14	3.22e-11	19	AKT1|EGF|EGFR|EIF4EBP1|FOS|HIF1A|JUN|MAPK1|MAPK3|MAPK8|MAPK9|MTOR|PDGFC|PLD2|PRKCA|RPS6KB1|SLC22A1|SLC5A7|WASF2	99/43622 genes: 0,23%
Fatty acid, triacylglycerol, and ketone body metabolism	REACT:R-HSA-535734	2.83e-14	5.01e-11	28	ACOT2|ACSL3|ANGPTL4|APOA2|ARNT|ARNTL|CCN2|CLOCK|ELOVL6|FASN|G0S2|HDAC3|HMGCS2|LPCAT4|LPIN1|ME1|NCOR2|NFYB|NPAS2|NR1D1|NRF1|PPARG|PPARGC1A|PRKAB2|PRKAG2|SCD|TRIB3|TXNRD1	252/43622 genes: 0,58%
Shigellosis	KEGG:hsa05131	3.34e-14	5.91e-11	16	ACTB|CD44|CHUK|CRK|CXCL8|MAPK1|MAPK11|MAPK14|MAPK3|MAPK8|MAPK9|NFKB1|NFKBIA|RELA|SRC|WASF2	65/43622 genes: 0,15%
Dilated cardiomyopathy	KEGG:hsa05414	3.38e-14	5.99e-11	18	ACTB|ADCY6|IGF1|ITGA10|ITGA2B|ITGA3|ITGA8|ITGAV|ITGB3|ITGB5|ITGB6|PLN|PRKACA|TGFB1|TGFB2|TGFB3|TNF|TNNC1	89/43622 genes: 0,20%
Calcium signaling pathway	KEGG:hsa04020	3.9e-14	6.91e-11	24	ADORA2A|ATP2A3|ATP2B2|ATP2B4|BDKRB2|CHRNA7|DRD1|EGFR|GRIN1|GRIN2A|HRH1|MYLK2|MYLK3|NOS1|NOS2|NOS3|PLCE1|PLN|PRKACA|PRKCA|PTK2B|TACR1|TACR2|TNNC1	181/43622 genes: 0,41%
Oxytocin signaling pathway	KEGG:hsa04921	7.2e-14	1.27e-10	22	ACTB|ADCY6|CAMKK2|CDKN1A|EGFR|FOS|JUN|KCNJ3|MAPK1|MAPK3|MEF2C|MYLK2|MYLK3|NOS3|NPR1|PRKAB2|PRKACA|PRKAG2|PRKCA|PTGS2|RGS2|SRC	152/43622 genes: 0,35%
G alpha (i) signalling events	REACT:R-HSA-418594	8.16e-14	1.45e-10	27	ADCY6|BDKRB2|C5|CCL19|CCL5|CXCL1|CXCL10|CXCL12|CXCL2|CXCL3|CXCL6|CXCL8|DRD2|GABBR2|GAL|GNB4|GPR18|KNG1|LPAR1|MCHR1|PYY|RGS16|RGS4|RGS5|RGS6|S1PR1|SAA1	243/43622 genes: 0,56%
Jak-STAT signaling pathway	KEGG:hsa04630	1.24e-13	2.2e-10	22	AKT1|BCL2|BCL2L1|CDKN1A|CISH|CSF2|CSF3|FHL1|GFAP|IFNG|IL12A|IL12B|IL23A|IL6|IL7|LIF|MCL1|MTOR|PIAS1|PRL|SOCS1|STAT3	156/43622 genes: 0,36%
TGF-beta signaling pathway	KEGG:hsa04350	1.72e-13	3.05e-10	17	BMP4|CDKN2B|ID1|ID2|IFNG|LEFTY2|MAPK1|MAPK3|NOG|RPS6KB1|SMAD7|TGFB1|TGFB2|TGFB3|TGFBR1|THBS1|TNF	84/43622 genes: 0,19%
Elastic fibre formation	REACT:R-HSA-1566948	3.27e-13	5.79e-10	13	BMP4|FBLN2|FBN1|ITGA8|ITGAV|ITGB3|ITGB5|ITGB6|LOX|MFAP2|TGFB1|TGFB2|TGFB3	42/43622 genes: 0,10%
Type I diabetes mellitus	KEGG:hsa04940	4.61e-13	8.16e-10	13	CD28|CD86|FAS|FASLG|GAD1|HLA-DRB4|IFNG|IL12A|IL12B|IL1A|IL1B|INS|TNF	43/43622 genes: 0,10%
Insulin signaling pathway	KEGG:hsa04910	9.55e-13	1.69e-09	20	AKT1|CRK|EIF4EBP1|FASN|FBP2|GSK3B|INS|INSR|MAPK1|MAPK3|MAPK8|MAPK9|MTOR|PPARGC1A|PRKAB2|PRKACA|PRKAG2|RPS6KB1|SHC3|SOCS1	138/43622 genes: 0,32%
Ion channel transport	REACT:R-HSA-983712	9.55e-13	1.69e-09	24	ANO3|ATP2A3|ATP2B2|ATP2B4|ATP6V1A|ATP6V1E2|ATP7A|ATP7B|ATP8A1|FXYD2|GABRA1|GABRB3|GABRG2|MCOLN3|NEDD4L|PLN|SCNN1G|SGK1|TPCN1|TRPM1|TRPM4|TRPV3|UBB|WNK4	209/43622 genes: 0,48%
GPCR downstream signaling	REACT:R-HSA-388396	9.73e-13	1.72e-09	55	ADCY6|ADM|ADORA2A|AKT1|ARHGEF10|ARHGEF16|ARHGEF4|ARHGEF6|ARHGEF7|BDKRB2|C5|CCL19|CCL5|CSF2|CXCL1|CXCL10|CXCL12|CXCL2|CXCL3|CXCL6|CXCL8|DRD1|DRD2|EDN1|F2RL1|FSHB|GABBR2|GAL|GCGR|GNB4|GNRH1|GPR18|HRH1|KISS1R|KNG1|LHB|LPAR1|MCF2L|MCHR1|PDE7A|PRKCA|PRKCD|PRKCQ|PTHLH|PYY|RGS16|RGS2|RGS4|RGS5|RGS6|RHOB|S1PR1|SAA1|TACR1|TACR2	1016/43622 genes: 2,33%
Cell cycle	KEGG:hsa04110	1.27e-12	2.25e-09	19	ATM|BUB1|CCNA1|CCNB2|CDKN1A|CDKN1C|CDKN2B|CDKN2C|GADD45A|GSK3B|HDAC2|MCM4|MCM5|MDM2|TGFB1|TGFB2|TGFB3|TP53|YWHAZ	124/43622 genes: 0,28%
Huntington's disease	KEGG:hsa05016	1.3e-12	2.3e-09	23	BAX|BDNF|CASP3|CASP8|CASP9|COX6A2|CREB1|CYCS|DNAH14|DNAI2|GPX1|GRIN1|GRIN2B|HDAC2|HTT|NRF1|PPARG|PPARGC1A|SDHA|SOD1|SOD2|TAF4B|TP53	193/43622 genes: 0,44%
Melanoma	KEGG:hsa05218	1.51e-12	2.68e-09	15	AKT1|CDKN1A|EGF|EGFR|FGF2|FGF20|HGF|IGF1|IGF1R|MAPK1|MAPK3|MDM2|MET|PDGFC|TP53	69/43622 genes: 0,16%
RIG-I-like receptor signaling pathway	KEGG:hsa04622	1.89e-12	3.35e-09	15	CASP8|CHUK|CXCL10|CXCL8|IL12A|IL12B|MAP3K7|MAPK11|MAPK14|MAPK8|MAPK9|NFKB1|NFKBIA|RELA|TNF	70/43622 genes: 0,16%
Regulation of lipid metabolism by Peroxisome proliferator-activated receptor alpha (PPARalpha)	REACT:R-HSA-400206	1.97e-12	3.49e-09	19	ANGPTL4|APOA2|ARNT|ARNTL|CCN2|CLOCK|G0S2|HDAC3|HMGCS2|ME1|NCOR2|NFYB|NPAS2|NR1D1|NRF1|PPARG|PPARGC1A|TRIB3|TXNRD1	127/43622 genes: 0,29%
Cholinergic synapse	KEGG:hsa04725	2.15e-12	3.8e-09	18	ACHE|ADCY6|AKT1|ATF4|BCL2|CHAT|CHRNA7|CREB1|FOS|GNB4|KCNJ3|KCNQ1|KCNQ2|MAPK1|MAPK3|PRKACA|PRKCA|SLC5A7	112/43622 genes: 0,26%
Adrenergic signaling in cardiomyocytes	KEGG:hsa04261	2.15e-12	3.81e-09	20	ADCY6|AKT1|ATF2|ATF4|ATP2B2|ATP2B4|BCL2|CREB1|FXYD2|KCNQ1|MAPK1|MAPK11|MAPK14|MAPK3|PLN|PRKACA|PRKCA|SCN5A|SCN7A|TNNC1	144/43622 genes: 0,33%
cGMP-PKG signaling pathway	KEGG:hsa04022	2.69e-12	4.76e-09	21	ADCY6|AKT1|ATF2|ATF4|ATP2A3|ATP2B2|ATP2B4|BDKRB2|CREB1|FXYD2|INS|INSR|MAPK1|MAPK3|MEF2C|MYLK2|MYLK3|NOS3|NPR1|PLN|RGS2	163/43622 genes: 0,37%
Adherens junction	KEGG:hsa04520	2.93e-12	5.19e-09	15	ACTB|CTNNA1|CTNNB1|CTNND1|EGFR|IGF1R|INSR|IQGAP1|MAP3K7|MAPK1|MAPK3|MET|SRC|TGFBR1|WASF2	72/43622 genes: 0,17%
Circadian rhythm	KEGG:hsa04710	3.96e-12	7.01e-09	11	ARNTL|BHLHE40|CLOCK|CREB1|CRY1|NPAS2|NR1D1|PER1|PER2|PRKAB2|PRKAG2	31/43622 genes: 0,07%
Molecules associated with elastic fibres	REACT:R-HSA-2129379	3.96e-12	7.01e-09	11	BMP4|FBLN2|ITGA8|ITGAV|ITGB3|ITGB5|ITGB6|MFAP2|TGFB1|TGFB2|TGFB3	31/43622 genes: 0,07%
Ferroptosis	KEGG:hsa04216	4.08e-12	7.23e-09	12	ACSL3|FTH1|FTL|HMOX1|PRNP|SLC11A2|SLC39A14|SLC39A8|SLC40A1|SLC7A11|TFRC|TP53	40/43622 genes: 0,09%
Membrane Trafficking	REACT:R-HSA-199991	5.03e-12	8.9e-09	40	AKT1|ANKRD28|AREG|BLOC1S3|CFTR|CHML|COL7A1|COPG2|EGF|EGFR|EXOC6|FTH1|FTL|GJA1|GJA5|GJA8|GJB5|IGF2R|INS|KIF3B|LMAN2|LRP2|MYH13|MYH2|NSF|PRKAB2|PRKAG2|RAB21|RAB3A|RABGAP1|RIN2|SORT1|SPTBN2|SRC|STX16|TACR1|TFRC|TGFA|UBB|YWHAZ	613/43622 genes: 1,41%
Bladder cancer	KEGG:hsa05219	5.68e-12	1.01e-08	12	CDKN1A|CXCL8|EGF|EGFR|MAPK1|MAPK3|MDM2|MMP9|SRC|THBS1|TP53|VEGFA	41/43622 genes: 0,09%
Peptide ligand-binding receptors	REACT:R-HSA-375276	5.77e-12	1.02e-08	22	BDKRB2|C5|CCL19|CCL5|CX3CL1|CXCL1|CXCL10|CXCL12|CXCL2|CXCL3|CXCL6|CXCL8|EDN1|F2RL1|GAL|KISS1R|KNG1|MCHR1|PYY|SAA1|TACR1|TACR2	188/43622 genes: 0,43%
Glioma	KEGG:hsa05214	7.68e-12	1.36e-08	14	AKT1|CDKN1A|EGF|EGFR|IGF1|IGF1R|MAPK1|MAPK3|MDM2|MTOR|PRKCA|SHC3|TGFA|TP53	64/43622 genes: 0,15%
PPARA activates gene expression	REACT:R-HSA-1989781	1.27e-11	2.25e-08	18	ANGPTL4|APOA2|ARNT|ARNTL|CCN2|CLOCK|G0S2|HDAC3|HMGCS2|ME1|NFYB|NPAS2|NR1D1|NRF1|PPARG|PPARGC1A|TRIB3|TXNRD1	124/43622 genes: 0,28%
Cell surface interactions at the vascular wall	REACT:R-HSA-202733	1.49e-11	2.65e-08	19	ANGPT2|CD44|CD48|CD74|FN1|ITGA3|ITGAM|ITGAV|ITGB3|LCK|LYN|PROC|PROS1|SELP|SLC16A3|SLC7A11|SRC|TEK|TGFB1	142/43622 genes: 0,33%
Oxidative Stress Induced Senescence	REACT:R-HSA-2559580	1.67e-11	2.96e-08	18	CDKN2B|CDKN2C|FOS|H2BU1|H3C1|JUN|MAP2K3|MAP2K4|MAPK1|MAPK11|MAPK14|MAPK3|MAPK8|MAPK9|MDM2|TNRC6A|TP53|UBB	126/43622 genes: 0,29%
Senescence-Associated Secretory Phenotype (SASP)	REACT:R-HSA-2559582	1.68e-11	2.97e-08	17	CCNA1|CDKN1A|CDKN2B|CDKN2C|CXCL8|FOS|H2BU1|H3C1|IL1A|IL6|JUN|MAPK1|MAPK3|NFKB1|RELA|STAT3|UBB	110/43622 genes: 0,25%
Amphetamine addiction	KEGG:hsa05031	1.85e-11	3.28e-08	14	ATF2|ATF4|CREB1|DRD1|FOS|GRIN1|GRIN2A|GRIN2B|JUN|PPP1R1B|PRKACA|PRKCA|SLC6A3|TH	68/43622 genes: 0,16%
Regulation of TP53 Activity	REACT:R-HSA-5633007	1.96e-11	3.48e-08	20	AKT1|ATM|CCNA1|CCNG1|HDAC2|MAPK11|MAPK14|MDM2|MTOR|NUAK1|PRKAB2|PRKAG2|RFC5|SGK1|TAF4B|TAF7L|TAF9B|TP53|TP73|UBB	162/43622 genes: 0,37%
ECM-receptor interaction	KEGG:hsa04512	2.14e-11	3.79e-08	15	CD44|COL4A5|COL6A1|FN1|ITGA10|ITGA2B|ITGA3|ITGA8|ITGAV|ITGB3|ITGB5|ITGB6|RELN|THBS1|TNN	82/43622 genes: 0,19%
Signaling by NOTCH	REACT:R-HSA-157118	2.26e-11	4e-08	17	ATP2A3|CREB1|DLK1|DLL4|DTX1|HDAC2|HDAC3|HDAC4|HEY1|HIF1A|JUN|NCOR2|NOTCH4|TLE2|TNRC6A|TP53|UBB	112/43622 genes: 0,26%
ECM proteoglycans	REACT:R-HSA-3000178	2.44e-11	4.33e-08	13	DSPP|ITGA2B|ITGA8|ITGAV|ITGB3|ITGB5|ITGB6|MATN3|SERPINE1|TGFB1|TGFB2|TGFB3|TNN	57/43622 genes: 0,13%
Neurotransmitter Receptor Binding And Downstream Transmission In The Postsynaptic Cell	REACT:R-HSA-112314	2.45e-11	4.35e-08	19	ADCY6|CHRNA7|CREB1|GABBR2|GABRA1|GABRB3|GABRG2|GNB4|GRIK3|GRIN1|GRIN2A|GRIN2B|KCNJ3|MAPK1|MDM2|NEFL|NSF|PRKACA|PRKCA	146/43622 genes: 0,33%
Interleukin-1 signaling	REACT:R-HSA-446652	2.58e-11	4.56e-08	12	CHUK|IL1A|IL1B|IL1R1|IL1R2|IL1RN|MAP2K4|MAP3K7|NFKB1|SQSTM1|TAB3|UBB	46/43622 genes: 0,11%
Muscle contraction	REACT:R-HSA-397014	2.94e-11	5.21e-08	22	ACTA2|ATP2A3|ATP2B2|ATP2B4|CALD1|FXYD2|ITGB5|KCNIP3|KCNK12|KCNQ1|NOS1|NPPA|NPR1|PLN|PRKACA|SCN3B|SCN5A|SCN7A|TLN1|TNNC1|TNNT1|VIM	204/43622 genes: 0,47%
Leukocyte transendothelial migration	KEGG:hsa04670	3.02e-11	5.35e-08	17	ACTB|CLDN23|CLDN4|CLDN9|CTNNA1|CTNNB1|CTNND1|CXCL12|ICAM1|ITGAM|MAPK11|MAPK14|MMP9|NCF4|PRKCA|PTK2B|VCAM1	114/43622 genes: 0,26%
Protein processing in endoplasmic reticulum	KEGG:hsa04141	3.08e-11	5.46e-08	20	ATF4|ATF6|BAX|BCL2|CASP12|CRYAA|CRYAB|DDIT3|EIF2AK3|EIF2S1|ERN1|HSP90B1|HSPA4L|HSPA5|LMAN2|MAPK8|MAPK9|NFE2L2|PRKN|XBP1	166/43622 genes: 0,38%
Nucleotide-binding domain, leucine rich repeat containing receptor (NLR) signaling pathways	REACT:R-HSA-168643	4.46e-11	7.9e-08	12	BCL2|BCL2L1|CARD9|CASP2|CASP4|CASP8|CASP9|CHUK|MAP3K7|MAPK11|MAPK14|TAB3	48/43622 genes: 0,11%
Transcriptional regulation of white adipocyte differentiation	REACT:R-HSA-381340	6.15e-11	1.09e-07	15	ADIPOQ|ANGPTL4|CEBPD|EGR2|HDAC3|KLF4|KLF5|NCOR2|NFKB1|PPARG|PPARGC1A|RELA|TGFB1|TNF|WNT10B	88/43622 genes: 0,20%
Thyroid hormone synthesis	KEGG:hsa04918	6.19e-11	1.1e-07	14	ADCY6|ALB|ATF2|ATF4|CREB1|FXYD2|GPX1|GSR|HSP90B1|HSPA5|LRP2|PRKACA|PRKCA|SLC26A4	74/43622 genes: 0,17%
Neuroactive ligand-receptor interaction	KEGG:hsa04080	6.63e-11	1.17e-07	25	ADORA2A|BDKRB2|CHRNA7|DRD1|DRD2|F2RL1|FSHB|GABBR2|GABRA1|GABRB3|GABRG2|GCGR|GRIK3|GRIN1|GRIN2A|GRIN2B|HRH1|KISS1R|LHB|LPAR1|MCHR1|PRL|S1PR1|TACR1|TACR2	277/43622 genes: 0,64%
Endometrial cancer	KEGG:hsa05213	7.52e-11	1.33e-07	12	AKT1|APC|AXIN2|CASP9|CTNNA1|CTNNB1|EGF|EGFR|GSK3B|MAPK1|MAPK3|TP53	50/43622 genes: 0,11%
Ovarian steroidogenesis	KEGG:hsa04913	7.52e-11	1.33e-07	12	ACOT2|ADCY6|CYP11A1|FSHB|IGF1|IGF1R|INS|INSR|LHB|PRKACA|PTGS2|STAR	50/43622 genes: 0,11%
PERK regulates gene expression	REACT:R-HSA-381042	7.87e-11	1.39e-07	10	ASNS|ATF4|ATF6|CCL2|CXCL8|DDIT3|EIF2AK3|EIF2S1|HSPA5|NFYB	30/43622 genes: 0,07%
Cell death signalling via NRAGE, NRIF and NADE	REACT:R-HSA-204998	9.03e-11	1.6e-07	14	ARHGEF10|ARHGEF16|ARHGEF4|ARHGEF6|ARHGEF7|BCL2L11|CASP2|CASP3|MAPK8|MCF2L|NGF|NGFR|SQSTM1|UBB	76/43622 genes: 0,17%
Platelet activation	KEGG:hsa04611	1.04e-10	1.84e-07	17	ACTB|ADCY6|AKT1|ITGA2B|ITGB3|LYN|MAPK1|MAPK11|MAPK14|MAPK3|MYLK2|MYLK3|NOS3|PRKACA|SRC|TBXAS1|TLN1	123/43622 genes: 0,28%
Activation of BH3-only proteins	REACT:R-HSA-114452	1.14e-10	2.02e-07	10	AKT1|BCL2|BCL2L11|BID|BMF|MAPK8|PMAIP1|TP53|TP73|YWHAZ	31/43622 genes: 0,07%
Unfolded Protein Response (UPR)	REACT:R-HSA-381119	1.19e-10	2.1e-07	15	ASNS|ATF4|ATF6|CCL2|CXCL8|CXXC1|DDIT3|EIF2AK3|EIF2S1|ERN1|HSP90B1|HSPA5|NFYB|TLN1|XBP1	92/43622 genes: 0,21%
Parkinson's disease	KEGG:hsa05012	1.27e-10	2.26e-07	18	ADORA2A|CASP3|CASP9|COX6A2|CYCS|DRD1|DRD2|PARK7|PINK1|PRKACA|PRKN|SDHA|SLC6A3|SNCA|TH|UBA1|UBB|UCHL1	142/43622 genes: 0,33%
Central carbon metabolism in cancer	KEGG:hsa05230	1.43e-10	2.54e-07	13	AKT1|EGFR|FGFR2|HIF1A|MAPK1|MAPK3|MET|MTOR|NTRK3|PDK1|RET|SLC16A3|TP53	65/43622 genes: 0,15%
Constitutive Signaling by Aberrant PI3K in Cancer	REACT:R-HSA-2219530	1.43e-10	2.54e-07	13	CD28|CD86|EGF|EGFR|EREG|FGF2|FGF20|FGFR2|HGF|LCK|MET|NRG1|NRG2	65/43622 genes: 0,15%
Interferon gamma signaling	REACT:R-HSA-877300	1.63e-10	2.89e-07	15	CD44|CIITA|FCGR1A|GBP5|HLA-DRB4|ICAM1|IFNG|IRF2|OASL|PIAS1|PRKCD|SOCS1|TRIM14|TRIM35|VCAM1	94/43622 genes: 0,22%
NOD1/2 Signaling Pathway	REACT:R-HSA-168638	1.63e-10	2.89e-07	10	CARD9|CASP2|CASP4|CASP8|CASP9|CHUK|MAP3K7|MAPK11|MAPK14|TAB3	32/43622 genes: 0,07%
Interferon Signaling	REACT:R-HSA-913531	1.64e-10	2.91e-07	21	CD44|CIITA|EGR1|FCGR1A|GBP5|HLA-DRB4|ICAM1|IFNG|IRF2|MAPK3|NUP210|OASL|PIAS1|PRKCD|RSAD2|SOCS1|TRIM14|TRIM35|UBB|USP18|VCAM1	202/43622 genes: 0,46%
ATF6 (ATF6-alpha) activates chaperone genes	REACT:R-HSA-381183	1.95e-10	3.44e-07	7	ATF4|ATF6|DDIT3|HSP90B1|HSPA5|NFYB|XBP1	11/43622 genes: 0,03%
Mitochondrial biogenesis	REACT:R-HSA-1592230	1.99e-10	3.52e-07	12	ATF2|CREB1|CYCS|HDAC3|MAPK11|MAPK14|MEF2C|NR1D1|NRF1|PPARGC1A|PRKAB2|PRKAG2	54/43622 genes: 0,12%
Fc epsilon RI signaling pathway	KEGG:hsa04664	2.14e-10	3.8e-07	13	AKT1|CSF2|LYN|MAP2K3|MAP2K4|MAPK1|MAPK11|MAPK14|MAPK3|MAPK8|MAPK9|PRKCA|TNF	67/43622 genes: 0,15%
Signaling by PTK6	REACT:R-HSA-8848021	2.14e-10	3.8e-07	13	AKT1|CRK|EGF|EGFR|EPAS1|EREG|GPNMB|HIF1A|NRG1|NRG2|STAT3|SYNGAP1|UBB	67/43622 genes: 0,15%
Signaling by ERBB4	REACT:R-HSA-1236394	2.21e-10	3.91e-07	11	CXCL12|EGF|EGFR|EREG|ESR1|GFAP|NRG1|NRG2|S100B|UBB|WWOX	43/43622 genes: 0,10%
Circadian entrainment	KEGG:hsa04713	2.22e-10	3.93e-07	15	ADCY6|CREB1|FOS|GNB4|GRIN1|GRIN2A|GRIN2B|KCNJ3|MAPK1|MAPK3|NOS1|PER1|PER2|PRKACA|PRKCA	96/43622 genes: 0,22%
Progesterone-mediated oocyte maturation	KEGG:hsa04914	2.22e-10	3.93e-07	15	ADCY6|AKT1|BUB1|CCNA1|CCNB2|IGF1|IGF1R|INS|MAPK1|MAPK11|MAPK14|MAPK3|MAPK8|MAPK9|PRKACA	96/43622 genes: 0,22%
Degradation of the extracellular matrix	REACT:R-HSA-1474228	2.22e-10	3.94e-07	16	ADAMTS1|ADAMTS5|CAPN5|CASP3|CD44|COL12A1|COL15A1|COL17A1|COL18A1|CTSD|HTRA1|MMP13|MMP14|MMP24|MMP3|MMP9	112/43622 genes: 0,26%
Glutamatergic synapse	KEGG:hsa04724	2.91e-10	5.16e-07	16	ADCY6|GLUL|GNB4|GRIK3|GRIN1|GRIN2A|GRIN2B|KCNJ3|MAPK1|MAPK3|PLD2|PRKACA|PRKCA|SLC1A2|SLC1A3|SLC38A3	114/43622 genes: 0,26%
Nuclear Events (kinase and transcription factor activation)	REACT:R-HSA-198725	3.19e-10	5.65e-07	9	ATF1|CREB1|DUSP4|DUSP6|MAPK1|MAPK11|MAPK14|MAPK3|MEF2C	25/43622 genes: 0,06%
Phagosome	KEGG:hsa04145	4.41e-10	7.81e-07	18	ACTB|ATP6V1A|ATP6V1E2|COLEC12|FCGR1A|FCGR3A|HLA-DRB4|ITGAM|ITGAV|ITGB3|ITGB5|MPO|NCF4|NOS1|PLA2R1|TFRC|THBS1|TLR6	153/43622 genes: 0,35%
L1CAM interactions	REACT:R-HSA-373760	4.64e-10	8.22e-07	15	EGFR|ITGA10|ITGA2B|ITGAV|ITGB3|KCNQ2|MAPK1|MAPK3|NRP1|NRP2|SCN3B|SCN5A|SCN7A|SPTBN2|SRC	101/43622 genes: 0,23%
Retrograde endocannabinoid signaling	KEGG:hsa04723	4.64e-10	8.22e-07	15	ADCY6|GABRA1|GABRB3|GABRG2|GNB4|KCNJ3|MAPK1|MAPK11|MAPK14|MAPK3|MAPK8|MAPK9|PRKACA|PRKCA|PTGS2	101/43622 genes: 0,23%
Type II diabetes mellitus	KEGG:hsa04930	4.87e-10	8.63e-07	11	ADIPOQ|INS|INSR|MAPK1|MAPK3|MAPK8|MAPK9|MTOR|PRKCD|SOCS1|TNF	46/43622 genes: 0,11%
GABAergic synapse	KEGG:hsa04727	6.92e-10	1.22e-06	14	ADCY6|GABBR2|GABRA1|GABRB3|GABRG2|GAD1|GLUL|GNB4|NSF|PRKACA|PRKCA|SLC38A3|SLC6A1|SRC	88/43622 genes: 0,20%
Transport of glucose and other sugars, bile salts and organic acids, metal ions and amine compounds	REACT:R-HSA-425366	8.12e-10	1.44e-06	15	HEPH|SLC11A1|SLC11A2|SLC16A3|SLC22A1|SLC22A15|SLC2A12|SLC2A13|SLC31A1|SLC39A14|SLC39A8|SLC40A1|SLC5A7|SLC6A1|SLC6A3	105/43622 genes: 0,24%
Aldosterone-regulated sodium reabsorption	KEGG:hsa04960	8.13e-10	1.44e-06	10	FXYD2|IGF1|INS|INSR|MAPK1|MAPK3|NEDD4L|PRKCA|SCNN1G|SGK1	37/43622 genes: 0,08%
ATF6 (ATF6-alpha) activates chaperones	REACT:R-HSA-381033	9.8e-10	1.74e-06	7	ATF4|ATF6|DDIT3|HSP90B1|HSPA5|NFYB|XBP1	13/43622 genes: 0,03%
Detoxification of Reactive Oxygen Species	REACT:R-HSA-3299685	1.09e-09	1.92e-06	10	ATP7A|CAT|CYCS|GPX1|GSR|NCF4|SOD1|SOD2|SOD3|TXNRD1	38/43622 genes: 0,09%
Wnt signaling pathway	KEGG:hsa04310	1.14e-09	2.02e-06	17	APC|AXIN2|CTNNB1|FOSL1|GSK3B|JUN|MAP3K7|MAPK8|MAPK9|PRKACA|PRKCA|TP53|WIF1|WNT10B|WNT11|WNT6|WNT7B	143/43622 genes: 0,33%
Signaling by RAS mutants	REACT:R-HSA-6802949	1.28e-09	2.26e-06	11	CNKSR1|FN1|IQGAP1|ITGA2B|ITGB3|MAP3K11|MAPK1|MAPK3|SRC|SYNGAP1|TLN1	50/43622 genes: 0,11%
Paradoxical activation of RAF signaling by kinase inactive BRAF	REACT:R-HSA-6802955	1.44e-09	2.54e-06	10	CNKSR1|FN1|IQGAP1|ITGA2B|ITGB3|MAP3K11|MAPK1|MAPK3|SRC|TLN1	39/43622 genes: 0,09%
Signaling by moderate kinase activity BRAF mutants	REACT:R-HSA-6802946	1.44e-09	2.54e-06	10	CNKSR1|FN1|IQGAP1|ITGA2B|ITGB3|MAP3K11|MAPK1|MAPK3|SRC|TLN1	39/43622 genes: 0,09%
TAK1 activates NFkB by phosphorylation and activation of IKKs complex	REACT:R-HSA-445989	1.47e-09	2.6e-06	9	CHUK|HMGB1|MAP3K7|NFKB1|NFKBIA|RELA|S100B|SAA1|TAB3	29/43622 genes: 0,07%
Collagen formation	REACT:R-HSA-1474290	1.47e-09	2.6e-06	14	COL12A1|COL15A1|COL17A1|COL18A1|COL4A5|COL5A2|COL6A1|COL7A1|COL8A1|LOX|MMP13|MMP3|MMP9|PCOLCE2	93/43622 genes: 0,21%
Regulation of TP53 Activity through Phosphorylation	REACT:R-HSA-6804756	1.47e-09	2.6e-06	14	ATM|CCNA1|MAPK11|MAPK14|MDM2|NUAK1|PRKAB2|PRKAG2|RFC5|TAF4B|TAF7L|TAF9B|TP53|UBB	93/43622 genes: 0,21%
Mineral absorption	KEGG:hsa04978	1.6e-09	2.84e-06	11	ATP7A|FTH1|FTL|FXYD2|HEPH|HMOX1|MT1A|SLC11A2|SLC31A1|SLC40A1|STEAP1	51/43622 genes: 0,12%
NF-kB is activated and signals survival	REACT:R-HSA-209560	1.93e-09	3.42e-06	7	NFKB1|NFKBIA|NGF|NGFR|RELA|SQSTM1|UBB	14/43622 genes: 0,03%
Deubiquitination	REACT:R-HSA-5688426	1.95e-09	3.46e-06	24	ACTB|APC|AXIN2|BECN1|CCNA1|CFTR|ESR1|H2BU1|HIF1A|KEAP1|MAP3K7|MDM2|NFKBIA|PRKN|SIAH2|SMAD7|TAF9B|TGFB1|TGFBR1|TP53|UBB|UCHL1|USP15|USP18	301/43622 genes: 0,69%
Neutrophil degranulation	REACT:R-HSA-6798695	2.39e-09	4.24e-06	31	ALDOA|ALDOC|ARG1|ATP8A1|CAMP|CAT|CD44|CR1|CTSD|CXCL1|FTH1|FTL|HMGB1|IGF2R|IQGAP1|ITGAM|ITGAV|LGALS3|MAPK1|MAPK14|MGST1|MMP9|MPO|NFKB1|PLAC8|PRKCD|PTX3|RAB3A|S100A9|SLC11A1|TNFAIP6	488/43622 genes: 1,12%
Graft-versus-host disease	KEGG:hsa05332	2.45e-09	4.34e-06	10	CD28|CD86|FAS|FASLG|HLA-DRB4|IFNG|IL1A|IL1B|IL6|TNF	41/43622 genes: 0,09%
Natural killer cell mediated cytotoxicity	KEGG:hsa04650	2.63e-09	4.66e-06	16	BID|CASP3|CD48|CSF2|FAS|FASLG|FCGR3A|ICAM1|IFNG|LCK|MAPK1|MAPK3|PRKCA|PTK2B|SHC3|TNF	132/43622 genes: 0,30%
BH3-only proteins associate with and inactivate anti-apoptotic BCL-2 members	REACT:R-HSA-111453	2.8e-09	4.95e-06	6	BCL2|BCL2L1|BCL2L11|BID|BMF|PMAIP1	9/43622 genes: 0,02%
Cell-Cell communication	REACT:R-HSA-1500931	3.28e-09	5.81e-06	16	ARHGEF6|CLDN23|CLDN4|CLDN9|COL17A1|CTNNA1|CTNNB1|CTNND1|DSCAML1|IQGAP1|MAPK11|MAPK14|MAPK8|PTK2B|PVR|SRC	134/43622 genes: 0,31%
Acute myeloid leukemia	KEGG:hsa05221	3.77e-09	6.67e-06	11	AKT1|CCNA1|CHUK|EIF4EBP1|MAPK1|MAPK3|MTOR|NFKB1|RELA|RPS6KB1|STAT3	55/43622 genes: 0,13%
Oncogene Induced Senescence	REACT:R-HSA-2559585	3.91e-09	6.93e-06	9	CDKN2B|CDKN2C|ID1|MAPK1|MAPK3|MDM2|TNRC6A|TP53|UBB	32/43622 genes: 0,07%
Melanogenesis	KEGG:hsa04916	4.44e-09	7.86e-06	14	ADCY6|CREB1|CTNNB1|EDN1|GSK3B|MAPK1|MAPK3|PRKACA|PRKCA|TYRP1|WNT10B|WNT11|WNT6|WNT7B	101/43622 genes: 0,23%
Vascular smooth muscle contraction	KEGG:hsa04270	6.03e-09	1.07e-05	15	ACTA2|ADCY6|ADORA2A|CALD1|MAPK1|MAPK3|MYLK2|MYLK3|NPR1|PLA2G2A|PLA2G2D|PRKACA|PRKCA|PRKCD|PRKCQ	121/43622 genes: 0,28%
Arrhythmogenic right ventricular cardiomyopathy (ARVC)	KEGG:hsa05412	6.61e-09	1.17e-05	12	ACTB|CTNNA1|CTNNB1|GJA1|ITGA10|ITGA2B|ITGA3|ITGA8|ITGAV|ITGB3|ITGB5|ITGB6	72/43622 genes: 0,17%
Gap junction	KEGG:hsa04540	7.15e-09	1.27e-05	13	ADCY6|DRD1|DRD2|EGF|EGFR|GJA1|LPAR1|MAPK1|MAPK3|PDGFC|PRKACA|PRKCA|SRC	88/43622 genes: 0,20%
VEGF signaling pathway	KEGG:hsa04370	8.25e-09	1.46e-05	11	AKT1|CASP9|MAPK1|MAPK11|MAPK14|MAPK3|NOS3|PRKCA|PTGS2|SRC|VEGFA	59/43622 genes: 0,14%
Cell adhesion molecules (CAMs)	KEGG:hsa04514	8.49e-09	1.5e-05	16	CD28|CD6|CD86|CD8B|CLDN23|CLDN4|CLDN9|HLA-DRB4|ICAM1|ITGA8|ITGAM|ITGAV|MADCAM1|PVR|SELP|VCAM1	143/43622 genes: 0,33%
Constitutive Signaling by AKT1 E17K in Cancer	REACT:R-HSA-5674400	9.29e-09	1.65e-05	8	AKT1|CASP9|CDKN1A|CHUK|CREB1|GSK3B|MDM2|MTOR	25/43622 genes: 0,06%
Nuclear signaling by ERBB4	REACT:R-HSA-1251985	9.29e-09	1.65e-05	8	CXCL12|EREG|ESR1|GFAP|NRG1|NRG2|S100B|WWOX	25/43622 genes: 0,06%
Regulation of TP53 Degradation	REACT:R-HSA-6804757	9.38e-09	1.66e-05	9	AKT1|ATM|CCNA1|CCNG1|MDM2|MTOR|SGK1|TP53|UBB	35/43622 genes: 0,08%
Signaling by high-kinase activity BRAF mutants	REACT:R-HSA-6802948	9.38e-09	1.66e-05	9	CNKSR1|FN1|IQGAP1|ITGA2B|ITGB3|MAPK1|MAPK3|SRC|TLN1	35/43622 genes: 0,08%
Assembly of collagen fibrils and other multimeric structures	REACT:R-HSA-2022090	9.94e-09	1.76e-05	11	COL15A1|COL18A1|COL4A5|COL5A2|COL6A1|COL7A1|COL8A1|LOX|MMP13|MMP3|MMP9	60/43622 genes: 0,14%
Phospholipase D signaling pathway	KEGG:hsa04072	1.04e-08	1.84e-05	16	ADCY6|AKT1|CXCL8|EGF|EGFR|INS|INSR|LPAR1|MAPK1|MAPK3|MTOR|PDGFC|PLD2|PRKCA|PTK2B|SHC3	145/43622 genes: 0,33%
p75NTR signals via NF-kB	REACT:R-HSA-193639	1.04e-08	1.85e-05	7	NFKB1|NFKBIA|NGF|NGFR|RELA|SQSTM1|UBB	17/43622 genes: 0,04%
Biosynthesis of amino acids	KEGG:hsa01230	1.07e-08	1.89e-05	12	ACO1|ACO2|ALDH18A1|ALDOA|ALDOC|ARG1|ASS1|CBS|ENO2|GAPDH|GLUL|PYCR1	75/43622 genes: 0,17%
Oncogenic MAPK signaling	REACT:R-HSA-6802957	1.07e-08	1.89e-05	12	BCL2L11|CNKSR1|FN1|IQGAP1|ITGA2B|ITGB3|MAP3K11|MAPK1|MAPK3|SRC|SYNGAP1|TLN1	75/43622 genes: 0,17%
Peptide hormone metabolism	REACT:R-HSA-2980736	1.09e-08	1.92e-05	13	ACE|ACHE|CGB3|CTNNB1|CTSD|DPP4|EXOC6|FSHB|IGF1|INS|KIF5C|KLF4|LHB	91/43622 genes: 0,21%
Regulation of TP53 Expression and Degradation	REACT:R-HSA-6806003	1.23e-08	2.18e-05	9	AKT1|ATM|CCNA1|CCNG1|MDM2|MTOR|SGK1|TP53|UBB	36/43622 genes: 0,08%
Chemokine receptors bind chemokines	REACT:R-HSA-380108	1.28e-08	2.26e-05	10	CCL19|CCL5|CX3CL1|CXCL1|CXCL10|CXCL12|CXCL2|CXCL3|CXCL6|CXCL8	48/43622 genes: 0,11%
Binding and Uptake of Ligands by Scavenger Receptors	REACT:R-HSA-2173782	1.58e-08	2.79e-05	10	ALB|APOL1|COLEC12|FTH1|FTL|HPX|HSP90B1|MASP1|SAA1|SCARA5	49/43622 genes: 0,11%
Endocytosis	KEGG:hsa04144	1.58e-08	2.8e-05	21	ACAP1|CAV2|EGF|EGFR|FGFR2|FLT1|IGF1R|IGF2R|KIF5C|MDM2|MET|NEDD4L|PLD2|PSD3|RET|SRC|TFRC|TGFB1|TGFB2|TGFB3|TGFBR1	260/43622 genes: 0,60%
Allograft rejection	KEGG:hsa05330	1.6e-08	2.83e-05	9	CD28|CD86|FAS|FASLG|HLA-DRB4|IFNG|IL12A|IL12B|TNF	37/43622 genes: 0,08%
Fcgamma receptor (FCGR) dependent phagocytosis	REACT:R-HSA-2029480	1.85e-08	3.28e-05	13	ABI2|ACTB|CRK|FCGR1A|FCGR3A|LYN|MAPK1|MAPK3|MYH2|PLD2|PRKCD|SRC|WASF2	95/43622 genes: 0,22%
Signaling by ERBB2	REACT:R-HSA-1227986	1.94e-08	3.43e-05	10	AKT1|EGF|EGFR|EREG|NRG1|NRG2|PRKCA|PRKCD|SRC|UBB	50/43622 genes: 0,11%
MAP2K and MAPK activation	REACT:R-HSA-5674135	2.64e-08	4.67e-05	9	CNKSR1|FN1|IQGAP1|ITGA2B|ITGB3|MAPK1|MAPK3|SRC|TLN1	39/43622 genes: 0,09%
Transcriptional regulation by the AP-2 (TFAP2) family of transcription factors	REACT:R-HSA-8864260	3.35e-08	5.93e-05	9	CDKN1A|CGB3|CITED1|EGFR|ESR1|TFAP2B|TGFA|VEGFA|WWOX	40/43622 genes: 0,09%
Interleukin-1 processing	REACT:R-HSA-448706	3.94e-08	6.99e-05	5	IL18|IL1A|IL1B|NFKB1|RELA	7/43622 genes: 0,02%
Syndecan interactions	REACT:R-HSA-3000170	3.96e-08	7.02e-05	7	FGF2|ITGAV|ITGB3|ITGB5|PRKCA|TGFB1|THBS1	20/43622 genes: 0,05%
Collagen degradation	REACT:R-HSA-1442490	4.22e-08	7.48e-05	9	COL12A1|COL15A1|COL17A1|COL18A1|CTSD|MMP13|MMP14|MMP3|MMP9	41/43622 genes: 0,09%
TP53 Regulates Metabolic Genes	REACT:R-HSA-5628897	4.57e-08	8.09e-05	12	AKT1|CYCS|GSR|MTOR|PRKAB2|PRKAG2|RRAGB|SESN2|TNRC6A|TP53|TXNRD1|YWHAZ	85/43622 genes: 0,19%
Basal cell carcinoma	KEGG:hsa05217	5.09e-08	9.01e-05	10	APC|AXIN2|BMP4|CTNNB1|GSK3B|TP53|WNT10B|WNT11|WNT6|WNT7B	55/43622 genes: 0,13%
B cell receptor signaling pathway	KEGG:hsa04662	5.32e-08	9.43e-05	11	AKT1|CHUK|FOS|GSK3B|JUN|LYN|MAPK1|MAPK3|NFKB1|NFKBIA|RELA	70/43622 genes: 0,16%
Advanced glycosylation endproduct receptor signaling	REACT:R-HSA-879415	5.37e-08	9.51e-05	6	HMGB1|LGALS3|MAPK1|MAPK3|S100B|SAA1	13/43622 genes: 0,03%
AKT phosphorylates targets in the cytosol	REACT:R-HSA-198323	5.37e-08	9.51e-05	6	AKT1|CASP9|CDKN1A|CHUK|GSK3B|MDM2	13/43622 genes: 0,03%
Cardiac conduction	REACT:R-HSA-5576891	5.37e-08	9.52e-05	15	ATP2A3|ATP2B2|ATP2B4|FXYD2|KCNIP3|KCNK12|KCNQ1|NOS1|NPPA|NPR1|PLN|PRKACA|SCN3B|SCN5A|SCN7A	142/43622 genes: 0,33%
RIP-mediated NFkB activation via ZBP1	REACT:R-HSA-1810476	5.85e-08	0.000104	7	CHUK|HMGB1|NFKB1|NFKBIA|RELA|S100B|SAA1	21/43622 genes: 0,05%
Signal transduction by L1	REACT:R-HSA-445144	5.85e-08	0.000104	7	EGFR|ITGA2B|ITGAV|ITGB3|MAPK1|MAPK3|NRP1	21/43622 genes: 0,05%
Iron uptake and transport	REACT:R-HSA-917937	8.14e-08	0.000144	9	ATP6V1A|ATP6V1E2|FTH1|FTL|HEPH|HMOX1|SLC11A2|SLC40A1|TFRC	44/43622 genes: 0,10%
Signaling by NOTCH1	REACT:R-HSA-1980143	8.34e-08	0.000148	11	DLK1|DLL4|DTX1|HDAC2|HDAC3|HDAC4|HEY1|HIF1A|NCOR2|TLE2|UBB	73/43622 genes: 0,17%
ERK/MAPK targets	REACT:R-HSA-198753	8.45e-08	0.00015	7	DUSP4|DUSP6|MAPK1|MAPK11|MAPK14|MAPK3|MEF2C	22/43622 genes: 0,05%
SHC1 events in ERBB2 signaling	REACT:R-HSA-1250196	8.45e-08	0.00015	7	EGF|EGFR|EREG|NRG1|NRG2|PRKCA|PRKCD	22/43622 genes: 0,05%
Non-small cell lung cancer	KEGG:hsa05223	8.64e-08	0.000153	10	AKT1|CASP9|EGF|EGFR|MAPK1|MAPK3|PRKCA|STAT3|TGFA|TP53	58/43622 genes: 0,13%
Viral myocarditis	KEGG:hsa05416	8.64e-08	0.000153	10	ACTB|BID|CASP3|CASP8|CASP9|CD28|CD86|CYCS|HLA-DRB4|ICAM1	58/43622 genes: 0,13%
Fc gamma R-mediated phagocytosis	KEGG:hsa04666	8.75e-08	0.000155	12	AKT1|CRK|FCGR1A|FCGR3A|LYN|MAPK1|MAPK3|PLD2|PRKCA|PRKCD|RPS6KB1|WASF2	90/43622 genes: 0,21%
Signaling by Rho GTPases	REACT:R-HSA-194315	9.71e-08	0.000172	26	ABI2|ACTB|ARHGAP24|ARHGDIA|ARHGEF10|ARHGEF16|ARHGEF4|ARHGEF6|ARHGEF7|BIRC5|BUB1|CFTR|CTNNA1|CTNNB1|ERCC6L|H2BU1|H3C1|IQGAP1|MAPK1|MAPK3|MCF2L|NCF4|RHOB|SRC|WASF2|YWHAZ	425/43622 genes: 0,97%
G alpha (q) signalling events	REACT:R-HSA-416476	9.72e-08	0.000172	17	BDKRB2|EDN1|F2RL1|GCGR|GNB4|GNRH1|HRH1|KISS1R|KNG1|LPAR1|MCHR1|PRKCD|PRKCQ|RGS2|SAA1|TACR1|TACR2	192/43622 genes: 0,44%
Tight junction	KEGG:hsa04530	9.91e-08	0.000176	16	ACTB|CFTR|CLDN23|CLDN4|CLDN9|JUN|MAPK8|MAPK9|MYH13|MYH2|NEDD4L|PRKAB2|PRKACA|PRKAG2|SRC|WHAMM	170/43622 genes: 0,39%
TP53 Regulates Transcription of Cell Death Genes	REACT:R-HSA-5633008	1e-07	0.000177	9	ATM|BAX|BID|BIRC5|CASP2|FAS|PMAIP1|TP53|TP73	45/43622 genes: 0,10%
VEGF binds to VEGFR leading to receptor dimerization	REACT:R-HSA-195399	1.04e-07	0.000184	5	FLT1|PGF|VEGFA|VEGFC|VEGFD	8/43622 genes: 0,02%
VEGF ligand-receptor interactions	REACT:R-HSA-194313	1.04e-07	0.000184	5	FLT1|PGF|VEGFA|VEGFC|VEGFD	8/43622 genes: 0,02%
CD28 co-stimulation	REACT:R-HSA-389356	1.05e-07	0.000186	8	AKT1|CD28|CD86|LCK|LYN|MTOR|SRC|TRIB3	33/43622 genes: 0,08%
RAF-independent MAPK1/3 activation	REACT:R-HSA-112409	1.2e-07	0.000212	7	DUSP2|DUSP4|DUSP5|DUSP6|IL6|MAPK1|MAPK3	23/43622 genes: 0,05%
NRAGE signals death through JNK	REACT:R-HSA-193648	1.21e-07	0.000214	10	ARHGEF10|ARHGEF16|ARHGEF4|ARHGEF6|ARHGEF7|BCL2L11|MAPK8|MCF2L|NGF|NGFR	60/43622 genes: 0,14%
Signaling by BRAF and RAF fusions	REACT:R-HSA-6802952	1.42e-07	0.000252	10	BCL2L11|CNKSR1|FN1|IQGAP1|ITGA2B|ITGB3|MAPK1|MAPK3|SRC|TLN1	61/43622 genes: 0,14%
Signaling by TGF-beta Receptor Complex	REACT:R-HSA-170834	1.47e-07	0.00026	11	CDKN2B|NCOR2|NEDD4L|PARP1|PMEPA1|SERPINE1|SMAD7|TGFB1|TGFBR1|UBB|USP15	77/43622 genes: 0,18%
Collagen chain trimerization	REACT:R-HSA-8948216	1.49e-07	0.000264	9	COL12A1|COL15A1|COL17A1|COL18A1|COL4A5|COL5A2|COL6A1|COL7A1|COL8A1	47/43622 genes: 0,11%
Intestinal immune network for IgA production	KEGG:hsa04672	1.49e-07	0.000264	9	AICDA|CD28|CD86|CXCL12|HLA-DRB4|IL6|MADCAM1|TGFB1|TNFRSF13B	47/43622 genes: 0,11%
Ub-specific processing proteases	REACT:R-HSA-5689880	1.67e-07	0.000296	18	AXIN2|BECN1|CCNA1|CFTR|H2BU1|HIF1A|KEAP1|MAP3K7|MDM2|NFKBIA|SIAH2|SMAD7|TAF9B|TGFBR1|TP53|UBB|USP15|USP18	223/43622 genes: 0,51%
Carbon metabolism	KEGG:hsa01200	1.68e-07	0.000297	13	ACO1|ACO2|ACSS2|ALDOA|ALDOC|CAT|DLD|ENO2|FBP2|GAPDH|ME1|ME3|SDHA	114/43622 genes: 0,26%
Complement and coagulation cascades	KEGG:hsa04610	1.92e-07	0.00034	11	BDKRB2|C4BPA|C5|CR1|ITGAM|KNG1|MASP1|PROC|PROS1|SERPINB2|SERPINE1	79/43622 genes: 0,18%
PI3K Cascade	REACT:R-HSA-109704	1.92e-07	0.00034	11	AKT1|EIF4EBP1|FGF2|FGF20|FGFR2|MTOR|PRKAB2|PRKAG2|RPS6KB1|RRAGB|TRIB3	79/43622 genes: 0,18%
Growth hormone receptor signaling	REACT:R-HSA-982772	2.27e-07	0.000402	7	CISH|LYN|MAPK1|MAPK3|PRL|SOCS1|STAT3	25/43622 genes: 0,06%
Metal ion SLC transporters	REACT:R-HSA-425410	2.27e-07	0.000402	7	HEPH|SLC11A1|SLC11A2|SLC31A1|SLC39A14|SLC39A8|SLC40A1	25/43622 genes: 0,06%
TRAF6 mediated NF-kB activation	REACT:R-HSA-933542	2.27e-07	0.000402	7	CHUK|HMGB1|NFKB1|NFKBIA|RELA|S100B|SAA1	25/43622 genes: 0,06%
ZBP1(DAI) mediated induction of type I IFNs	REACT:R-HSA-1606322	2.27e-07	0.000402	7	CHUK|HMGB1|NFKB1|NFKBIA|RELA|S100B|SAA1	25/43622 genes: 0,06%
p130Cas linkage to MAPK signaling for integrins	REACT:R-HSA-372708	2.39e-07	0.000424	6	CRK|FN1|ITGA2B|ITGB3|SRC|TLN1	16/43622 genes: 0,04%
TFAP2 (AP-2) family regulates transcription of growth factors and their receptors	REACT:R-HSA-8866910	2.39e-07	0.000424	6	CGB3|EGFR|ESR1|TFAP2B|TGFA|VEGFA	16/43622 genes: 0,04%
Death Receptor Signalling	REACT:R-HSA-73887	2.61e-07	0.000462	9	CASP8|CFLAR|CHUK|FAS|FASLG|MAP3K7|TAB3|TNF|UBB	50/43622 genes: 0,11%
Aldosterone synthesis and secretion	KEGG:hsa04925	2.83e-07	0.000501	11	ADCY6|ATF1|ATF2|ATF4|CREB1|CYP11A1|NPR1|PRKACA|PRKCA|PRKD1|STAR	82/43622 genes: 0,19%
Signaling by Wnt	REACT:R-HSA-195721	2.95e-07	0.000522	22	AKT1|APC|AXIN2|CTNNB1|DACT1|GNB4|GSK3B|H2BU1|H3C1|LGR4|MAP3K7|PDE6B|PRKCA|TLE2|TNRC6A|UBB|WIF1|WNT10B|WNT11|WNT6|WNT7B|YWHAZ	336/43622 genes: 0,77%
CLEC7A (Dectin-1) signaling	REACT:R-HSA-5607764	3.18e-07	0.000563	12	CARD9|CASP8|CHUK|IL1B|MAP3K7|NFKB1|NFKBIA|PRKCD|RELA|SRC|TAB3|UBB	101/43622 genes: 0,23%
ATF4 activates genes	REACT:R-HSA-380994	4.06e-07	0.00072	7	ASNS|ATF4|ATF6|CCL2|CXCL8|DDIT3|NFYB	27/43622 genes: 0,06%
Downregulation of TGF-beta receptor signaling	REACT:R-HSA-2173788	4.06e-07	0.00072	7	NEDD4L|PMEPA1|SMAD7|TGFB1|TGFBR1|UBB|USP15	27/43622 genes: 0,06%
Apoptotic cleavage of cellular proteins	REACT:R-HSA-111465	4.22e-07	0.000748	8	APC|CASP3|CASP8|CTNNB1|MAPT|PRKCD|PRKCQ|VIM	39/43622 genes: 0,09%
Apoptotic execution phase	REACT:R-HSA-75153	4.4e-07	0.000779	9	APC|CASP3|CASP8|CTNNB1|HMGB1|MAPT|PRKCD|PRKCQ|VIM	53/43622 genes: 0,12%
Activation of PPARGC1A (PGC-1alpha) by phosphorylation	REACT:R-HSA-2151209	4.52e-07	0.000801	5	MAPK11|MAPK14|PPARGC1A|PRKAB2|PRKAG2	10/43622 genes: 0,02%
C-type lectin receptors (CLRs)	REACT:R-HSA-5621481	4.53e-07	0.000803	14	CARD9|CASP8|CHUK|IL1B|LYN|MAP3K7|NFKB1|NFKBIA|PRKACA|PRKCD|RELA|SRC|TAB3|UBB	145/43622 genes: 0,33%
Integrin alphaIIb beta3 signaling	REACT:R-HSA-354192	5.33e-07	0.000945	7	AKT1|CRK|FN1|ITGA2B|ITGB3|SRC|TLN1	28/43622 genes: 0,06%
Collagen biosynthesis and modifying enzymes	REACT:R-HSA-1650814	5.4e-07	0.000957	10	COL12A1|COL15A1|COL17A1|COL18A1|COL4A5|COL5A2|COL6A1|COL7A1|COL8A1|PCOLCE2	70/43622 genes: 0,16%
Cell Cycle	REACT:R-HSA-1640170	5.4e-07	0.000957	31	AKT1|ATM|BIRC5|BUB1|CCNA1|CCNB2|CDKN1A|CDKN1C|CDKN2B|CDKN2C|ERCC6L|H2BU1|H3C1|LPIN1|MAPK1|MAPK3|MCM4|MCM5|MDM2|MSH5|NUP210|PHLDA1|PRIM1|PRIM2|PRKACA|PRKCA|RFC5|SYCP1|TP53|UBB|YWHAZ	621/43622 genes: 1,42%
VEGFR2 mediated vascular permeability	REACT:R-HSA-5218920	6.92e-07	0.00123	7	AKT1|CTNNA1|CTNNB1|CTNND1|MTOR|NOS3|TRIB3	29/43622 genes: 0,07%
Protein digestion and absorption	KEGG:hsa04974	7.37e-07	0.00131	11	COL12A1|COL15A1|COL17A1|COL18A1|COL4A5|COL5A2|COL6A1|COL7A1|DPP4|FXYD2|KCNQ1	90/43622 genes: 0,21%
Morphine addiction	KEGG:hsa05032	8.25e-07	0.00146	11	ADCY6|DRD1|GABBR2|GABRA1|GABRB3|GABRG2|GNB4|KCNJ3|PDE7A|PRKACA|PRKCA	91/43622 genes: 0,21%
Axon guidance	KEGG:hsa04360	8.26e-07	0.00146	15	CXCL12|EPHA2|EPHA4|GSK3B|MAPK1|MAPK3|MET|NRP1|NTN4|PDK1|PRKCA|ROBO1|ROBO2|SEMA6A|SRC	175/43622 genes: 0,40%
Downregulation of ERBB2 signaling	REACT:R-HSA-8863795	8.89e-07	0.00157	7	AKT1|EGF|EGFR|EREG|NRG1|NRG2|UBB	30/43622 genes: 0,07%
Antifolate resistance	KEGG:hsa01523	1.13e-06	0.002	7	ABCC2|CHUK|IL1B|IL6|NFKB1|RELA|TNF	31/43622 genes: 0,07%
Bacterial invasion of epithelial cells	KEGG:hsa05100	1.18e-06	0.00209	10	ACTB|CAV2|CRK|CTNNA1|CTNNB1|FN1|MET|SHC3|SRC|WASF2	76/43622 genes: 0,17%
Non-integrin membrane-ECM interactions	REACT:R-HSA-3000171	1.34e-06	0.00238	8	FGF2|ITGAV|ITGB3|ITGB5|NTN4|PRKCA|TGFB1|THBS1	45/43622 genes: 0,10%
Transcriptional activation of mitochondrial biogenesis	REACT:R-HSA-2151201	1.34e-06	0.00238	8	ATF2|CREB1|CYCS|HDAC3|MEF2C|NR1D1|NRF1|PPARGC1A	45/43622 genes: 0,10%
PECAM1 interactions	REACT:R-HSA-210990	1.38e-06	0.00244	5	ITGAV|ITGB3|LCK|LYN|SRC	12/43622 genes: 0,03%
Pancreatic secretion	KEGG:hsa04972	1.42e-06	0.00251	11	ADCY6|ATP2A3|ATP2B2|ATP2B4|CFTR|FXYD2|KCNQ1|PLA2G2A|PLA2G2D|PNLIP|PRKCA	96/43622 genes: 0,22%
Arginine biosynthesis	KEGG:hsa00220	1.5e-06	0.00266	6	ARG1|ASS1|GLUL|NOS1|NOS2|NOS3	21/43622 genes: 0,05%
Scavenging by Class A Receptors	REACT:R-HSA-3000480	1.5e-06	0.00266	6	COLEC12|FTH1|FTL|HSP90B1|MASP1|SCARA5	21/43622 genes: 0,05%
TP53 Regulates Transcription of Genes Involved in Cytochrome C Release	REACT:R-HSA-6803204	1.5e-06	0.00266	6	ATM|BAX|BID|PMAIP1|TP53|TP73	21/43622 genes: 0,05%
CLEC7A/inflammasome pathway	REACT:R-HSA-5660668	1.56e-06	0.00277	4	CASP8|IL1B|NFKB1|RELA	6/43622 genes: 0,01%
NADE modulates death signalling	REACT:R-HSA-205025	1.56e-06	0.00277	4	CASP2|CASP3|NGF|NGFR	6/43622 genes: 0,01%
p75NTR negatively regulates cell cycle via SC1	REACT:R-HSA-193670	1.56e-06	0.00277	4	HDAC2|HDAC3|NGF|NGFR	6/43622 genes: 0,01%
ROS, RNS production in phagocytes	REACT:R-HSA-1222556	1.78e-06	0.00315	7	ATP6V1A|ATP6V1E2|NCF4|NOS1|NOS2|NOS3|SLC11A1	33/43622 genes: 0,08%
Cytosolic DNA-sensing pathway	KEGG:hsa04623	2e-06	0.00354	9	CCL5|CHUK|CXCL10|IL18|IL1B|IL6|NFKB1|NFKBIA|RELA	63/43622 genes: 0,14%
CD28 dependent PI3K/Akt signaling	REACT:R-HSA-389357	2.03e-06	0.0036	6	AKT1|CD28|CD86|LCK|MTOR|TRIB3	22/43622 genes: 0,05%
Negative regulation of FGFR2 signaling	REACT:R-HSA-5654727	2.2e-06	0.0039	7	FGF2|FGF20|FGFR2|MAPK1|MAPK3|SRC|UBB	34/43622 genes: 0,08%
TGF-beta receptor signaling activates SMADs	REACT:R-HSA-2173789	2.2e-06	0.0039	7	NEDD4L|PMEPA1|SMAD7|TGFB1|TGFBR1|UBB|USP15	34/43622 genes: 0,08%
DEx/H-box helicases activate type I IFN and inflammatory cytokines production	REACT:R-HSA-3134963	2.21e-06	0.00391	5	HMGB1|NFKB1|RELA|S100B|SAA1	13/43622 genes: 0,03%
ERBB2 Activates PTK6 Signaling	REACT:R-HSA-8847993	2.21e-06	0.00391	5	EGF|EGFR|EREG|NRG1|NRG2	13/43622 genes: 0,03%
NOTCH1 Intracellular Domain Regulates Transcription	REACT:R-HSA-2122947	2.24e-06	0.00397	8	HDAC2|HDAC3|HDAC4|HEY1|HIF1A|NCOR2|TLE2|UBB	48/43622 genes: 0,11%
TP53 Regulates Transcription of Cell Cycle Genes	REACT:R-HSA-6791312	2.64e-06	0.00467	8	ARID3A|BAX|CCNA1|CDKN1A|CNOT2|CNOT6L|GADD45A|TP53	49/43622 genes: 0,11%
RIG-I/MDA5 mediated induction of IFN-alpha/beta pathways	REACT:R-HSA-168928	2.99e-06	0.0053	10	CASP8|CHUK|HMGB1|IRF2|NFKB1|NFKBIA|RELA|S100B|SAA1|UBB	84/43622 genes: 0,19%
Stimuli-sensing channels	REACT:R-HSA-2672351	3.14e-06	0.00557	11	ANO3|MCOLN3|NEDD4L|SCNN1G|SGK1|TPCN1|TRPM1|TRPM4|TRPV3|UBB|WNK4	104/43622 genes: 0,24%
EGFR interacts with phospholipase C-gamma	REACT:R-HSA-212718	3.32e-06	0.00587	7	ADCY6|CREB1|EGF|EGFR|PRKACA|PRKCA|PRKCD	36/43622 genes: 0,08%
Insulin secretion	KEGG:hsa04911	3.34e-06	0.00591	10	ADCY6|ATF2|ATF4|CREB1|FXYD2|INS|PRKACA|PRKCA|RAB3A|TRPM4	85/43622 genes: 0,19%
ERBB2 Regulates Cell Motility	REACT:R-HSA-6785631	3.38e-06	0.00599	5	EGF|EGFR|EREG|NRG1|NRG2	14/43622 genes: 0,03%
Cell Cycle, Mitotic	REACT:R-HSA-69278	3.45e-06	0.00611	26	AKT1|BIRC5|BUB1|CCNA1|CCNB2|CDKN1A|CDKN1C|CDKN2B|CDKN2C|ERCC6L|H2BU1|H3C1|LPIN1|MAPK1|MAPK3|MCM4|MCM5|NUP210|PHLDA1|PRIM1|PRIM2|PRKACA|PRKCA|RFC5|TP53|UBB	514/43622 genes: 1,18%
Diseases associated with the TLR signaling cascade	REACT:R-HSA-5602358	3.55e-06	0.00629	6	CHUK|NFKB1|NFKBIA|RELA|TLR5|TLR6	24/43622 genes: 0,06%
Diseases of Immune System	REACT:R-HSA-5260271	3.55e-06	0.00629	6	CHUK|NFKB1|NFKBIA|RELA|TLR5|TLR6	24/43622 genes: 0,06%
IkBA variant leads to EDA-ID	REACT:R-HSA-5603029	3.6e-06	0.00637	4	CHUK|NFKB1|NFKBIA|RELA	7/43622 genes: 0,02%
Neurotransmitter Release Cycle	REACT:R-HSA-112310	3.61e-06	0.00639	8	CHAT|GAD1|RAB3A|SLC1A2|SLC1A3|SLC22A1|SLC5A7|SLC6A1	51/43622 genes: 0,12%
Cytosolic sensors of pathogen-associated DNA	REACT:R-HSA-1834949	3.84e-06	0.0068	9	CHUK|CTNNB1|HMGB1|NFKB1|NFKBIA|RELA|S100B|SAA1|UBB	68/43622 genes: 0,16%
Metabolism of vitamins and cofactors	REACT:R-HSA-196854	4.02e-06	0.00711	14	ACP5|APOA2|FASN|LRAT|LRP2|LRP8|MMAB|MTHFD2|MTHFD2L|NAMPT|PNLIP|PTGS2|QPRT|RFK	174/43622 genes: 0,40%
Post NMDA receptor activation events	REACT:R-HSA-438064	4.02e-06	0.00713	7	CREB1|GRIN1|GRIN2A|GRIN2B|MAPK1|NEFL|PRKACA	37/43622 genes: 0,08%
Platelet Aggregation (Plug Formation)	REACT:R-HSA-76009	4.86e-06	0.0086	7	AKT1|CRK|FN1|ITGA2B|ITGB3|SRC|TLN1	38/43622 genes: 0,09%
Regulation of actin dynamics for phagocytic cup formation	REACT:R-HSA-2029482	4.91e-06	0.00869	9	ABI2|ACTB|CRK|FCGR1A|FCGR3A|MAPK1|MAPK3|MYH2|WASF2	70/43622 genes: 0,16%
NRIF signals cell death from the nucleus	REACT:R-HSA-205043	5e-06	0.00885	5	MAPK8|NGF|NGFR|SQSTM1|UBB	15/43622 genes: 0,03%
Toll-like receptor signaling	KEGG:hsa_M00686	5e-06	0.00885	5	CHUK|MAP3K7|NFKB1|NFKBIA|RELA	15/43622 genes: 0,03%
Systemic lupus erythematosus	KEGG:hsa05322	5.58e-06	0.00989	12	C5|CD28|CD86|FCGR1A|FCGR3A|GRIN2A|GRIN2B|H2BU1|H3C1|HLA-DRB4|IFNG|TNF	132/43622 genes: 0,30%

## Sheet: MnCl2-CGNs
#term ID	term description	observed gene count	background gene count	false discovery rate	matching proteins in your network (IDs)	matching proteins in your network (labels)
mmu03010	Ribosome	51	128	4.03e-67	ENSMUSP00000000756	ENSMUSP00000003521	ENSMUSP00000004072	ENSMUSP00000004554	ENSMUSP00000006496	ENSMUSP00000008812	ENSMUSP00000017548	ENSMUSP00000025511	ENSMUSP00000029722	ENSMUSP00000031617	ENSMUSP00000032998	ENSMUSP00000034966	ENSMUSP00000035105	ENSMUSP00000038352	ENSMUSP00000046506	ENSMUSP00000048469	ENSMUSP00000054490	ENSMUSP00000058432	ENSMUSP00000058919	ENSMUSP00000069004	ENSMUSP00000071616	ENSMUSP00000073175	ENSMUSP00000076447	ENSMUSP00000079180	ENSMUSP00000079340	ENSMUSP00000079628	ENSMUSP00000080354	ENSMUSP00000080523	ENSMUSP00000080854	ENSMUSP00000081474	ENSMUSP00000086614	ENSMUSP00000099435	ENSMUSP00000099757	ENSMUSP00000099878	ENSMUSP00000099909	ENSMUSP00000102213	ENSMUSP00000103365	ENSMUSP00000103940	ENSMUSP00000104067	ENSMUSP00000106014	ENSMUSP00000110013	ENSMUSP00000110532	ENSMUSP00000110731	ENSMUSP00000110886	ENSMUSP00000118787
mmu03050	Proteasome	19	45	1.96e-24	ENSMUSP00000005923	ENSMUSP00000014913	ENSMUSP00000018430	ENSMUSP00000021412	ENSMUSP00000022803	ENSMUSP00000028083	ENSMUSP00000029082	ENSMUSP00000030642	ENSMUSP00000030769	ENSMUSP00000033008	ENSMUSP00000034369	ENSMUSP00000034848	ENSMUSP00000051657	ENSMUSP00000071054	ENSMUSP00000088057	ENSMUSP00000099436	ENSMUSP00000125548	ENSMUSP00000129767	ENSMUSP00000133499	Psma1	Psma2	Psma3	Psma4	Psma5	Psma6	Psma7	Psmb1	Psmb10	Psmb2	Psmb3	Psmb4	Psmb5	Psmb6	Psmb7	Psmb9	Psmc2	Psmc3	Psmd8
mmu00190	Oxidative phosphorylation	18	129	7.77e-16	ENSMUSP00000000090	ENSMUSP00000014457	ENSMUSP00000016396	ENSMUSP00000023210	ENSMUSP00000023608	ENSMUSP00000023677	ENSMUSP00000031637	ENSMUSP00000033176	ENSMUSP00000045284	ENSMUSP00000051222	ENSMUSP00000053145	ENSMUSP00000054856	ENSMUSP00000077744	ENSMUSP00000079944	ENSMUSP00000101006	ENSMUSP00000113022	ENSMUSP00000115419	ENSMUSP00000125504	Atp5d	Atp5e	Atp5f1	Atp5j	Atp5j2	Atp5k	Atp5o	Cox5a	Cox5b	Cox6c	Cox7c	Cyc1	Ndufa4	Uqcr10	Uqcrc2	Uqcrfs1	Uqcrh	Uqcrq
mmu05010	Alzheimer's disease	18	167	3.66e-14	ENSMUSP00000000090	ENSMUSP00000014457	ENSMUSP00000016396	ENSMUSP00000023210	ENSMUSP00000023608	ENSMUSP00000023677	ENSMUSP00000031637	ENSMUSP00000033176	ENSMUSP00000045284	ENSMUSP00000053145	ENSMUSP00000054856	ENSMUSP00000077744	ENSMUSP00000079944	ENSMUSP00000101006	ENSMUSP00000105709	ENSMUSP00000113022	ENSMUSP00000115419	ENSMUSP00000121358	Atp5d	Atp5e	Atp5f1	Atp5j	Atp5o	Calm1	Cox5a	Cox5b	Cox6c	Cox7c	Cyc1	Ide	Ndufa4	Uqcr10	Uqcrc2	Uqcrfs1	Uqcrh	Uqcrq
mmu04714	Thermogenesis	19	223	2.42e-13	ENSMUSP00000000090	ENSMUSP00000014457	ENSMUSP00000016396	ENSMUSP00000023210	ENSMUSP00000023608	ENSMUSP00000023677	ENSMUSP00000031637	ENSMUSP00000033176	ENSMUSP00000045284	ENSMUSP00000051222	ENSMUSP00000053145	ENSMUSP00000054856	ENSMUSP00000077744	ENSMUSP00000079944	ENSMUSP00000099878	ENSMUSP00000101006	ENSMUSP00000113022	ENSMUSP00000115419	ENSMUSP00000125504	Atp5d	Atp5e	Atp5f1	Atp5j	Atp5j2	Atp5k	Atp5o	Cox5a	Cox5b	Cox6c	Cox7c	Cyc1	Ndufa4	Rps6	Uqcr10	Uqcrc2	Uqcrfs1	Uqcrh	Uqcrq
mmu05012	Parkinson's disease	16	138	3.54e-13	ENSMUSP00000000090	ENSMUSP00000014457	ENSMUSP00000016396	ENSMUSP00000023210	ENSMUSP00000023608	ENSMUSP00000023677	ENSMUSP00000031637	ENSMUSP00000033176	ENSMUSP00000045284	ENSMUSP00000053145	ENSMUSP00000054856	ENSMUSP00000077744	ENSMUSP00000079944	ENSMUSP00000101006	ENSMUSP00000113022	ENSMUSP00000115419	Atp5d	Atp5e	Atp5f1	Atp5j	Atp5o	Cox5a	Cox5b	Cox6c	Cox7c	Cyc1	Ndufa4	Uqcr10	Uqcrc2	Uqcrfs1	Uqcrh	Uqcrq
mmu05016	Huntington's disease	16	187	2.29e-11	ENSMUSP00000000090	ENSMUSP00000014457	ENSMUSP00000016396	ENSMUSP00000023210	ENSMUSP00000023608	ENSMUSP00000023677	ENSMUSP00000031637	ENSMUSP00000033176	ENSMUSP00000045284	ENSMUSP00000053145	ENSMUSP00000054856	ENSMUSP00000077744	ENSMUSP00000079944	ENSMUSP00000101006	ENSMUSP00000113022	ENSMUSP00000115419	Atp5d	Atp5e	Atp5f1	Atp5j	Atp5o	Cox5a	Cox5b	Cox6c	Cox7c	Cyc1	Ndufa4	Uqcr10	Uqcrc2	Uqcrfs1	Uqcrh	Uqcrq
mmu01100	Metabolic pathways	33	1296	3.37e-09	ENSMUSP00000000090	ENSMUSP00000001304	ENSMUSP00000011058	ENSMUSP00000014457	ENSMUSP00000016396	ENSMUSP00000019323	ENSMUSP00000022268	ENSMUSP00000023210	ENSMUSP00000023608	ENSMUSP00000023677	ENSMUSP00000031637	ENSMUSP00000033176	ENSMUSP00000034567	ENSMUSP00000034856	ENSMUSP00000035743	ENSMUSP00000045284	ENSMUSP00000051222	ENSMUSP00000053145	ENSMUSP00000054856	ENSMUSP00000060346	ENSMUSP00000077744	ENSMUSP00000079944	ENSMUSP00000084846	ENSMUSP00000100045	ENSMUSP00000101006	ENSMUSP00000106481	ENSMUSP00000110434	ENSMUSP00000113022	ENSMUSP00000115419	ENSMUSP00000120976	ENSMUSP00000125504	ENSMUSP00000129704	ENSMUSP00000130898	Akr1b3	Aldoa	Atp5d	Atp5e	Atp5f1	Atp5j	Atp5j2	Atp5k	Atp5o	Ckb	Cox5a	Cox5b
mmu04260	Cardiac muscle contraction	10	75	6.37e-09	ENSMUSP00000000090	ENSMUSP00000014457	ENSMUSP00000023210	ENSMUSP00000033176	ENSMUSP00000045284	ENSMUSP00000053145	ENSMUSP00000054856	ENSMUSP00000077744	ENSMUSP00000079944	ENSMUSP00000115419	Cox5a	Cox5b	Cox6c	Cox7c	Cyc1	Uqcr10	Uqcrc2	Uqcrfs1	Uqcrh	Uqcrq
mmu04932	Non-alcoholic fatty liver disease (NAFLD)	11	146	1.98e-07	ENSMUSP00000000090	ENSMUSP00000014457	ENSMUSP00000023210	ENSMUSP00000031637	ENSMUSP00000033176	ENSMUSP00000045284	ENSMUSP00000053145	ENSMUSP00000054856	ENSMUSP00000077744	ENSMUSP00000079944	ENSMUSP00000115419	Cox5a	Cox5b	Cox6c	Cox7c	Cyc1	Ndufa4	Uqcr10	Uqcrc2	Uqcrfs1	Uqcrh	Uqcrq
mmu01200	Carbon metabolism	8	118	3.58e-05	ENSMUSP00000019323	ENSMUSP00000022268	ENSMUSP00000022573	ENSMUSP00000034567	ENSMUSP00000060346	ENSMUSP00000084846	ENSMUSP00000106481	ENSMUSP00000120976	Aldoa	Dlat	Dld	Dlst	Esd	Hadha	Mdh2	Pdhb
mmu00020	Citrate cycle (TCA cycle)	5	32	6e-05	ENSMUSP00000019323	ENSMUSP00000022268	ENSMUSP00000034567	ENSMUSP00000060346	ENSMUSP00000106481	Dlat	Dld	Dlst	Mdh2	Pdhb
mmu04721	Synaptic vesicle cycle	5	62	0.001	ENSMUSP00000005509	ENSMUSP00000021273	ENSMUSP00000028727	ENSMUSP00000089051	ENSMUSP00000100912	Snap25	Stx1a	Stxbp1	Syt1	Vamp2
mmu00620	Pyruvate metabolism	4	38	0.0019	ENSMUSP00000019323	ENSMUSP00000022268	ENSMUSP00000034567	ENSMUSP00000106481	Dlat	Dld	Mdh2	Pdhb
mmu00010	Glycolysis / Gluconeogenesis	4	65	0.0115	ENSMUSP00000022268	ENSMUSP00000034567	ENSMUSP00000084846	ENSMUSP00000106481	Aldoa	Dlat	Dld	Pdhb
mmu00051	Fructose and mannose metabolism	3	35	0.018	ENSMUSP00000034856	ENSMUSP00000084846	ENSMUSP00000100045	Akr1b3	Aldoa	Mpi
MMU-8953854	Metabolism of RNA	37	448	5.53e-25	ENSMUSP00000003521	ENSMUSP00000005923	ENSMUSP00000006496	ENSMUSP00000007814	ENSMUSP00000008812	ENSMUSP00000014913	ENSMUSP00000018430	ENSMUSP00000021412	ENSMUSP00000022803	ENSMUSP00000025511	ENSMUSP00000028083	ENSMUSP00000029082	ENSMUSP00000029722	ENSMUSP00000030642	ENSMUSP00000032998	ENSMUSP00000033008	ENSMUSP00000034369	ENSMUSP00000034848	ENSMUSP00000047678	ENSMUSP00000051657	ENSMUSP00000054490	ENSMUSP00000058432	ENSMUSP00000069004	ENSMUSP00000071054	ENSMUSP00000076447	ENSMUSP00000079180	ENSMUSP00000088057	ENSMUSP00000099436	ENSMUSP00000103940	ENSMUSP00000110013	ENSMUSP00000110532	ENSMUSP00000119975	ENSMUSP00000120528	ENSMUSP00000125548	ENSMUSP00000126294	ENSMUSP00000127774	ENSMUSP00000129767	Eif4b	Eif4g1	Khsrp	Psma1	Psma2	Psma3	Psma4	Psma5
MMU-72702	Ribosomal scanning and start codon recognition	19	46	9.76e-24	ENSMUSP00000003521	ENSMUSP00000006496	ENSMUSP00000008812	ENSMUSP00000025511	ENSMUSP00000029722	ENSMUSP00000032998	ENSMUSP00000047678	ENSMUSP00000054490	ENSMUSP00000058432	ENSMUSP00000069004	ENSMUSP00000076447	ENSMUSP00000079180	ENSMUSP00000103940	ENSMUSP00000110013	ENSMUSP00000110532	ENSMUSP00000119975	ENSMUSP00000120528	ENSMUSP00000126294	ENSMUSP00000127774	Eif4b	Eif4g1	Rps10	Rps11	Rps13	Rps14	Rps15	Rps15a	Rps16	Rps18	Rps20	Rps21	Rps23	Rps25	Rps26-ps1	Rps28	Rps3	Rps3a1	Rps9
MMU-72649	Translation initiation complex formation	19	48	1.26e-23	ENSMUSP00000003521	ENSMUSP00000006496	ENSMUSP00000008812	ENSMUSP00000025511	ENSMUSP00000029722	ENSMUSP00000032998	ENSMUSP00000047678	ENSMUSP00000054490	ENSMUSP00000058432	ENSMUSP00000069004	ENSMUSP00000076447	ENSMUSP00000079180	ENSMUSP00000103940	ENSMUSP00000110013	ENSMUSP00000110532	ENSMUSP00000119975	ENSMUSP00000120528	ENSMUSP00000126294	ENSMUSP00000127774	Eif4b	Eif4g1	Rps10	Rps11	Rps13	Rps14	Rps15	Rps15a	Rps16	Rps18	Rps20	Rps21	Rps23	Rps25	Rps26-ps1	Rps28	Rps3	Rps3a1	Rps9
MMU-156827	L13a-mediated translational silencing of Ceruloplasmin expression	19	50	1.43e-23	ENSMUSP00000003521	ENSMUSP00000006496	ENSMUSP00000008812	ENSMUSP00000025511	ENSMUSP00000029722	ENSMUSP00000032998	ENSMUSP00000047678	ENSMUSP00000054490	ENSMUSP00000058432	ENSMUSP00000069004	ENSMUSP00000076447	ENSMUSP00000079180	ENSMUSP00000103940	ENSMUSP00000110013	ENSMUSP00000110532	ENSMUSP00000119975	ENSMUSP00000120528	ENSMUSP00000126294	ENSMUSP00000127774	Eif4b	Eif4g1	Rps10	Rps11	Rps13	Rps14	Rps15	Rps15a	Rps16	Rps18	Rps20	Rps21	Rps23	Rps25	Rps26-ps1	Rps28	Rps3	Rps3a1	Rps9
MMU-72689	Formation of a pool of free 40S subunits	17	37	2.45e-22	ENSMUSP00000003521	ENSMUSP00000006496	ENSMUSP00000008812	ENSMUSP00000025511	ENSMUSP00000029722	ENSMUSP00000032998	ENSMUSP00000054490	ENSMUSP00000058432	ENSMUSP00000069004	ENSMUSP00000076447	ENSMUSP00000079180	ENSMUSP00000103940	ENSMUSP00000110013	ENSMUSP00000110532	ENSMUSP00000119975	ENSMUSP00000120528	ENSMUSP00000126294	Rps10	Rps11	Rps13	Rps14	Rps15	Rps15a	Rps16	Rps18	Rps20	Rps21	Rps23	Rps25	Rps26-ps1	Rps28	Rps3	Rps3a1	Rps9
MMU-450408	AUF1 (hnRNP D0) binds and destabilizes mRNA	18	52	6.24e-22	ENSMUSP00000005923	ENSMUSP00000014913	ENSMUSP00000018430	ENSMUSP00000021412	ENSMUSP00000022803	ENSMUSP00000028083	ENSMUSP00000029082	ENSMUSP00000030642	ENSMUSP00000033008	ENSMUSP00000034369	ENSMUSP00000034848	ENSMUSP00000047678	ENSMUSP00000051657	ENSMUSP00000071054	ENSMUSP00000088057	ENSMUSP00000099436	ENSMUSP00000125548	ENSMUSP00000129767	Eif4g1	Psma1	Psma2	Psma3	Psma4	Psma5	Psma6	Psma7	Psmb1	Psmb10	Psmb2	Psmb3	Psmb4	Psmb5	Psmb6	Psmb7	Psmc3	Psmd8
MMU-72695	Formation of the ternary complex and subsequently the 43S complex	17	40	6.24e-22	ENSMUSP00000003521	ENSMUSP00000006496	ENSMUSP00000008812	ENSMUSP00000025511	ENSMUSP00000029722	ENSMUSP00000032998	ENSMUSP00000054490	ENSMUSP00000058432	ENSMUSP00000069004	ENSMUSP00000076447	ENSMUSP00000079180	ENSMUSP00000103940	ENSMUSP00000110013	ENSMUSP00000110532	ENSMUSP00000119975	ENSMUSP00000120528	ENSMUSP00000126294	Rps10	Rps11	Rps13	Rps14	Rps15	Rps15a	Rps16	Rps18	Rps20	Rps21	Rps23	Rps25	Rps26-ps1	Rps28	Rps3	Rps3a1	Rps9
MMU-1236978	Cross-presentation of soluble exogenous antigens (endosomes)	17	46	3.63e-21	ENSMUSP00000005923	ENSMUSP00000014913	ENSMUSP00000018430	ENSMUSP00000021412	ENSMUSP00000022803	ENSMUSP00000028083	ENSMUSP00000029082	ENSMUSP00000030642	ENSMUSP00000033008	ENSMUSP00000034369	ENSMUSP00000034848	ENSMUSP00000051657	ENSMUSP00000071054	ENSMUSP00000088057	ENSMUSP00000099436	ENSMUSP00000125548	ENSMUSP00000129767	Psma1	Psma2	Psma3	Psma4	Psma5	Psma6	Psma7	Psmb1	Psmb10	Psmb2	Psmb3	Psmb4	Psmb5	Psmb6	Psmb7	Psmc3	Psmd8
MMU-349425	Autodegradation of the E3 ubiquitin ligase COP1	17	47	3.63e-21	ENSMUSP00000005923	ENSMUSP00000014913	ENSMUSP00000018430	ENSMUSP00000021412	ENSMUSP00000022803	ENSMUSP00000028083	ENSMUSP00000029082	ENSMUSP00000030642	ENSMUSP00000033008	ENSMUSP00000034369	ENSMUSP00000034848	ENSMUSP00000051657	ENSMUSP00000071054	ENSMUSP00000088057	ENSMUSP00000099436	ENSMUSP00000125548	ENSMUSP00000129767	Psma1	Psma2	Psma3	Psma4	Psma5	Psma6	Psma7	Psmb1	Psmb10	Psmb2	Psmb3	Psmb4	Psmb5	Psmb6	Psmb7	Psmc3	Psmd8
MMU-450531	Regulation of mRNA stability by proteins that bind AU-rich elements	19	75	3.63e-21	ENSMUSP00000005923	ENSMUSP00000007814	ENSMUSP00000014913	ENSMUSP00000018430	ENSMUSP00000021412	ENSMUSP00000022803	ENSMUSP00000028083	ENSMUSP00000029082	ENSMUSP00000030642	ENSMUSP00000033008	ENSMUSP00000034369	ENSMUSP00000034848	ENSMUSP00000047678	ENSMUSP00000051657	ENSMUSP00000071054	ENSMUSP00000088057	ENSMUSP00000099436	ENSMUSP00000125548	ENSMUSP00000129767	Eif4g1	Khsrp	Psma1	Psma2	Psma3	Psma4	Psma5	Psma6	Psma7	Psmb1	Psmb10	Psmb2	Psmb3	Psmb4	Psmb5	Psmb6	Psmb7	Psmc3	Psmd8
MMU-69229	Ubiquitin-dependent degradation of Cyclin D1	17	46	3.63e-21	ENSMUSP00000005923	ENSMUSP00000014913	ENSMUSP00000018430	ENSMUSP00000021412	ENSMUSP00000022803	ENSMUSP00000028083	ENSMUSP00000029082	ENSMUSP00000030642	ENSMUSP00000033008	ENSMUSP00000034369	ENSMUSP00000034848	ENSMUSP00000051657	ENSMUSP00000071054	ENSMUSP00000088057	ENSMUSP00000099436	ENSMUSP00000125548	ENSMUSP00000129767	Psma1	Psma2	Psma3	Psma4	Psma5	Psma6	Psma7	Psmb1	Psmb10	Psmb2	Psmb3	Psmb4	Psmb5	Psmb6	Psmb7	Psmc3	Psmd8
MMU-69601	Ubiquitin Mediated Degradation of Phosphorylated Cdc25A	17	47	3.63e-21	ENSMUSP00000005923	ENSMUSP00000014913	ENSMUSP00000018430	ENSMUSP00000021412	ENSMUSP00000022803	ENSMUSP00000028083	ENSMUSP00000029082	ENSMUSP00000030642	ENSMUSP00000033008	ENSMUSP00000034369	ENSMUSP00000034848	ENSMUSP00000051657	ENSMUSP00000071054	ENSMUSP00000088057	ENSMUSP00000099436	ENSMUSP00000125548	ENSMUSP00000129767	Psma1	Psma2	Psma3	Psma4	Psma5	Psma6	Psma7	Psmb1	Psmb10	Psmb2	Psmb3	Psmb4	Psmb5	Psmb6	Psmb7	Psmc3	Psmd8
MMU-8939902	Regulation of RUNX2 expression and activity	17	46	3.63e-21	ENSMUSP00000005923	ENSMUSP00000014913	ENSMUSP00000018430	ENSMUSP00000021412	ENSMUSP00000022803	ENSMUSP00000028083	ENSMUSP00000029082	ENSMUSP00000030642	ENSMUSP00000033008	ENSMUSP00000034369	ENSMUSP00000034848	ENSMUSP00000051657	ENSMUSP00000071054	ENSMUSP00000088057	ENSMUSP00000099436	ENSMUSP00000125548	ENSMUSP00000129767	Psma1	Psma2	Psma3	Psma4	Psma5	Psma6	Psma7	Psmb1	Psmb10	Psmb2	Psmb3	Psmb4	Psmb5	Psmb6	Psmb7	Psmc3	Psmd8
MMU-350562	Regulation of ornithine decarboxylase (ODC)	17	48	3.64e-21	ENSMUSP00000005923	ENSMUSP00000014913	ENSMUSP00000018430	ENSMUSP00000021412	ENSMUSP00000022803	ENSMUSP00000028083	ENSMUSP00000029082	ENSMUSP00000030642	ENSMUSP00000033008	ENSMUSP00000034369	ENSMUSP00000034848	ENSMUSP00000051657	ENSMUSP00000071054	ENSMUSP00000088057	ENSMUSP00000099436	ENSMUSP00000125548	ENSMUSP00000129767	Psma1	Psma2	Psma3	Psma4	Psma5	Psma6	Psma7	Psmb1	Psmb10	Psmb2	Psmb3	Psmb4	Psmb5	Psmb6	Psmb7	Psmc3	Psmd8
MMU-4641257	Degradation of AXIN	17	49	4.64e-21	ENSMUSP00000005923	ENSMUSP00000014913	ENSMUSP00000018430	ENSMUSP00000021412	ENSMUSP00000022803	ENSMUSP00000028083	ENSMUSP00000029082	ENSMUSP00000030642	ENSMUSP00000033008	ENSMUSP00000034369	ENSMUSP00000034848	ENSMUSP00000051657	ENSMUSP00000071054	ENSMUSP00000088057	ENSMUSP00000099436	ENSMUSP00000125548	ENSMUSP00000129767	Psma1	Psma2	Psma3	Psma4	Psma5	Psma6	Psma7	Psmb1	Psmb10	Psmb2	Psmb3	Psmb4	Psmb5	Psmb6	Psmb7	Psmc3	Psmd8
MMU-8941858	Regulation of RUNX3 expression and activity	17	49	4.64e-21	ENSMUSP00000005923	ENSMUSP00000014913	ENSMUSP00000018430	ENSMUSP00000021412	ENSMUSP00000022803	ENSMUSP00000028083	ENSMUSP00000029082	ENSMUSP00000030642	ENSMUSP00000033008	ENSMUSP00000034369	ENSMUSP00000034848	ENSMUSP00000051657	ENSMUSP00000071054	ENSMUSP00000088057	ENSMUSP00000099436	ENSMUSP00000125548	ENSMUSP00000129767	Psma1	Psma2	Psma3	Psma4	Psma5	Psma6	Psma7	Psmb1	Psmb10	Psmb2	Psmb3	Psmb4	Psmb5	Psmb6	Psmb7	Psmc3	Psmd8
MMU-351202	Metabolism of polyamines	19	79	4.9e-21	ENSMUSP00000001304	ENSMUSP00000005923	ENSMUSP00000014913	ENSMUSP00000018430	ENSMUSP00000021412	ENSMUSP00000022803	ENSMUSP00000028083	ENSMUSP00000029082	ENSMUSP00000030642	ENSMUSP00000033008	ENSMUSP00000034369	ENSMUSP00000034848	ENSMUSP00000051657	ENSMUSP00000071054	ENSMUSP00000088057	ENSMUSP00000099436	ENSMUSP00000125548	ENSMUSP00000129704	ENSMUSP00000129767	Ckb	Enoph1	Psma1	Psma2	Psma3	Psma4	Psma5	Psma6	Psma7	Psmb1	Psmb10	Psmb2	Psmb3	Psmb4	Psmb5	Psmb6	Psmb7	Psmc3	Psmd8
MMU-174113	SCF-beta-TrCP mediated degradation of Emi1	17	50	5.41e-21	ENSMUSP00000005923	ENSMUSP00000014913	ENSMUSP00000018430	ENSMUSP00000021412	ENSMUSP00000022803	ENSMUSP00000028083	ENSMUSP00000029082	ENSMUSP00000030642	ENSMUSP00000033008	ENSMUSP00000034369	ENSMUSP00000034848	ENSMUSP00000051657	ENSMUSP00000071054	ENSMUSP00000088057	ENSMUSP00000099436	ENSMUSP00000125548	ENSMUSP00000129767	Psma1	Psma2	Psma3	Psma4	Psma5	Psma6	Psma7	Psmb1	Psmb10	Psmb2	Psmb3	Psmb4	Psmb5	Psmb6	Psmb7	Psmc3	Psmd8
MMU-8854050	FBXL7 down-regulates AURKA during mitotic entry and in early mitosis	17	50	5.41e-21	ENSMUSP00000005923	ENSMUSP00000014913	ENSMUSP00000018430	ENSMUSP00000021412	ENSMUSP00000022803	ENSMUSP00000028083	ENSMUSP00000029082	ENSMUSP00000030642	ENSMUSP00000033008	ENSMUSP00000034369	ENSMUSP00000034848	ENSMUSP00000051657	ENSMUSP00000071054	ENSMUSP00000088057	ENSMUSP00000099436	ENSMUSP00000125548	ENSMUSP00000129767	Psma1	Psma2	Psma3	Psma4	Psma5	Psma6	Psma7	Psmb1	Psmb10	Psmb2	Psmb3	Psmb4	Psmb5	Psmb6	Psmb7	Psmc3	Psmd8
MMU-4641258	Degradation of DVL	17	52	8.4e-21	ENSMUSP00000005923	ENSMUSP00000014913	ENSMUSP00000018430	ENSMUSP00000021412	ENSMUSP00000022803	ENSMUSP00000028083	ENSMUSP00000029082	ENSMUSP00000030642	ENSMUSP00000033008	ENSMUSP00000034369	ENSMUSP00000034848	ENSMUSP00000051657	ENSMUSP00000071054	ENSMUSP00000088057	ENSMUSP00000099436	ENSMUSP00000125548	ENSMUSP00000129767	Psma1	Psma2	Psma3	Psma4	Psma5	Psma6	Psma7	Psmb1	Psmb10	Psmb2	Psmb3	Psmb4	Psmb5	Psmb6	Psmb7	Psmc3	Psmd8
MMU-5610780	Degradation of GLI1 by the proteasome	17	52	8.4e-21	ENSMUSP00000005923	ENSMUSP00000014913	ENSMUSP00000018430	ENSMUSP00000021412	ENSMUSP00000022803	ENSMUSP00000028083	ENSMUSP00000029082	ENSMUSP00000030642	ENSMUSP00000033008	ENSMUSP00000034369	ENSMUSP00000034848	ENSMUSP00000051657	ENSMUSP00000071054	ENSMUSP00000088057	ENSMUSP00000099436	ENSMUSP00000125548	ENSMUSP00000129767	Psma1	Psma2	Psma3	Psma4	Psma5	Psma6	Psma7	Psmb1	Psmb10	Psmb2	Psmb3	Psmb4	Psmb5	Psmb6	Psmb7	Psmc3	Psmd8
MMU-1168372	Downstream signaling events of B Cell Receptor (BCR)	18	67	9.2e-21	ENSMUSP00000005923	ENSMUSP00000014913	ENSMUSP00000018430	ENSMUSP00000021412	ENSMUSP00000022803	ENSMUSP00000028083	ENSMUSP00000029082	ENSMUSP00000030642	ENSMUSP00000033008	ENSMUSP00000034369	ENSMUSP00000034848	ENSMUSP00000051657	ENSMUSP00000071054	ENSMUSP00000088057	ENSMUSP00000099436	ENSMUSP00000105709	ENSMUSP00000125548	ENSMUSP00000129767	Calm1	Psma1	Psma2	Psma3	Psma4	Psma5	Psma6	Psma7	Psmb1	Psmb10	Psmb2	Psmb3	Psmb4	Psmb5	Psmb6	Psmb7	Psmc3	Psmd8
MMU-5607761	Dectin-1 mediated noncanonical NF-kB signaling	17	53	9.93e-21	ENSMUSP00000005923	ENSMUSP00000014913	ENSMUSP00000018430	ENSMUSP00000021412	ENSMUSP00000022803	ENSMUSP00000028083	ENSMUSP00000029082	ENSMUSP00000030642	ENSMUSP00000033008	ENSMUSP00000034369	ENSMUSP00000034848	ENSMUSP00000051657	ENSMUSP00000071054	ENSMUSP00000088057	ENSMUSP00000099436	ENSMUSP00000125548	ENSMUSP00000129767	Psma1	Psma2	Psma3	Psma4	Psma5	Psma6	Psma7	Psmb1	Psmb10	Psmb2	Psmb3	Psmb4	Psmb5	Psmb6	Psmb7	Psmc3	Psmd8
MMU-5676590	NIK-->noncanonical NF-kB signaling	17	53	9.93e-21	ENSMUSP00000005923	ENSMUSP00000014913	ENSMUSP00000018430	ENSMUSP00000021412	ENSMUSP00000022803	ENSMUSP00000028083	ENSMUSP00000029082	ENSMUSP00000030642	ENSMUSP00000033008	ENSMUSP00000034369	ENSMUSP00000034848	ENSMUSP00000051657	ENSMUSP00000071054	ENSMUSP00000088057	ENSMUSP00000099436	ENSMUSP00000125548	ENSMUSP00000129767	Psma1	Psma2	Psma3	Psma4	Psma5	Psma6	Psma7	Psmb1	Psmb10	Psmb2	Psmb3	Psmb4	Psmb5	Psmb6	Psmb7	Psmc3	Psmd8
MMU-68827	CDT1 association with the CDC6:ORC:origin complex	17	53	9.93e-21	ENSMUSP00000005923	ENSMUSP00000014913	ENSMUSP00000018430	ENSMUSP00000021412	ENSMUSP00000022803	ENSMUSP00000028083	ENSMUSP00000029082	ENSMUSP00000030642	ENSMUSP00000033008	ENSMUSP00000034369	ENSMUSP00000034848	ENSMUSP00000051657	ENSMUSP00000071054	ENSMUSP00000088057	ENSMUSP00000099436	ENSMUSP00000125548	ENSMUSP00000129767	Psma1	Psma2	Psma3	Psma4	Psma5	Psma6	Psma7	Psmb1	Psmb10	Psmb2	Psmb3	Psmb4	Psmb5	Psmb6	Psmb7	Psmc3	Psmd8
MMU-8852276	The role of GTSE1 in G2/M progression after G2 checkpoint	18	68	1.02e-20	ENSMUSP00000005923	ENSMUSP00000014913	ENSMUSP00000018430	ENSMUSP00000021412	ENSMUSP00000022803	ENSMUSP00000028083	ENSMUSP00000029082	ENSMUSP00000030642	ENSMUSP00000033008	ENSMUSP00000034369	ENSMUSP00000034848	ENSMUSP00000051033	ENSMUSP00000051657	ENSMUSP00000071054	ENSMUSP00000088057	ENSMUSP00000099436	ENSMUSP00000125548	ENSMUSP00000129767	Psma1	Psma2	Psma3	Psma4	Psma5	Psma6	Psma7	Psmb1	Psmb10	Psmb2	Psmb3	Psmb4	Psmb5	Psmb6	Psmb7	Psmc3	Psmd8	Tuba1c
MMU-5610785	GLI3 is processed to GLI3R by the proteasome	17	54	1.14e-20	ENSMUSP00000005923	ENSMUSP00000014913	ENSMUSP00000018430	ENSMUSP00000021412	ENSMUSP00000022803	ENSMUSP00000028083	ENSMUSP00000029082	ENSMUSP00000030642	ENSMUSP00000033008	ENSMUSP00000034369	ENSMUSP00000034848	ENSMUSP00000051657	ENSMUSP00000071054	ENSMUSP00000088057	ENSMUSP00000099436	ENSMUSP00000125548	ENSMUSP00000129767	Psma1	Psma2	Psma3	Psma4	Psma5	Psma6	Psma7	Psmb1	Psmb10	Psmb2	Psmb3	Psmb4	Psmb5	Psmb6	Psmb7	Psmc3	Psmd8
MMU-187577	SCF(Skp2)-mediated degradation of p27/p21	17	55	1.45e-20	ENSMUSP00000005923	ENSMUSP00000014913	ENSMUSP00000018430	ENSMUSP00000021412	ENSMUSP00000022803	ENSMUSP00000028083	ENSMUSP00000029082	ENSMUSP00000030642	ENSMUSP00000033008	ENSMUSP00000034369	ENSMUSP00000034848	ENSMUSP00000051657	ENSMUSP00000071054	ENSMUSP00000088057	ENSMUSP00000099436	ENSMUSP00000125548	ENSMUSP00000129767	Psma1	Psma2	Psma3	Psma4	Psma5	Psma6	Psma7	Psmb1	Psmb10	Psmb2	Psmb3	Psmb4	Psmb5	Psmb6	Psmb7	Psmc3	Psmd8
MMU-174084	Autodegradation of Cdh1 by Cdh1:APC/C	17	57	2.29e-20	ENSMUSP00000005923	ENSMUSP00000014913	ENSMUSP00000018430	ENSMUSP00000021412	ENSMUSP00000022803	ENSMUSP00000028083	ENSMUSP00000029082	ENSMUSP00000030642	ENSMUSP00000033008	ENSMUSP00000034369	ENSMUSP00000034848	ENSMUSP00000051657	ENSMUSP00000071054	ENSMUSP00000088057	ENSMUSP00000099436	ENSMUSP00000125548	ENSMUSP00000129767	Psma1	Psma2	Psma3	Psma4	Psma5	Psma6	Psma7	Psmb1	Psmb10	Psmb2	Psmb3	Psmb4	Psmb5	Psmb6	Psmb7	Psmc3	Psmd8
MMU-4608870	Asymmetric localization of PCP proteins	17	57	2.29e-20	ENSMUSP00000005923	ENSMUSP00000014913	ENSMUSP00000018430	ENSMUSP00000021412	ENSMUSP00000022803	ENSMUSP00000028083	ENSMUSP00000029082	ENSMUSP00000030642	ENSMUSP00000033008	ENSMUSP00000034369	ENSMUSP00000034848	ENSMUSP00000051657	ENSMUSP00000071054	ENSMUSP00000088057	ENSMUSP00000099436	ENSMUSP00000125548	ENSMUSP00000129767	Psma1	Psma2	Psma3	Psma4	Psma5	Psma6	Psma7	Psmb1	Psmb10	Psmb2	Psmb3	Psmb4	Psmb5	Psmb6	Psmb7	Psmc3	Psmd8
MMU-1169091	Activation of NF-kappaB in B cells	17	58	2.79e-20	ENSMUSP00000005923	ENSMUSP00000014913	ENSMUSP00000018430	ENSMUSP00000021412	ENSMUSP00000022803	ENSMUSP00000028083	ENSMUSP00000029082	ENSMUSP00000030642	ENSMUSP00000033008	ENSMUSP00000034369	ENSMUSP00000034848	ENSMUSP00000051657	ENSMUSP00000071054	ENSMUSP00000088057	ENSMUSP00000099436	ENSMUSP00000125548	ENSMUSP00000129767	Psma1	Psma2	Psma3	Psma4	Psma5	Psma6	Psma7	Psmb1	Psmb10	Psmb2	Psmb3	Psmb4	Psmb5	Psmb6	Psmb7	Psmc3	Psmd8
MMU-5358346	Hedgehog ligand biogenesis	17	58	2.79e-20	ENSMUSP00000005923	ENSMUSP00000014913	ENSMUSP00000018430	ENSMUSP00000021412	ENSMUSP00000022803	ENSMUSP00000028083	ENSMUSP00000029082	ENSMUSP00000030642	ENSMUSP00000033008	ENSMUSP00000034369	ENSMUSP00000034848	ENSMUSP00000051657	ENSMUSP00000071054	ENSMUSP00000088057	ENSMUSP00000099436	ENSMUSP00000125548	ENSMUSP00000129767	Psma1	Psma2	Psma3	Psma4	Psma5	Psma6	Psma7	Psmb1	Psmb10	Psmb2	Psmb3	Psmb4	Psmb5	Psmb6	Psmb7	Psmc3	Psmd8
MMU-1234176	Oxygen-dependent proline hydroxylation of Hypoxia-inducible Factor Alpha	17	60	4.13e-20	ENSMUSP00000005923	ENSMUSP00000014913	ENSMUSP00000018430	ENSMUSP00000021412	ENSMUSP00000022803	ENSMUSP00000028083	ENSMUSP00000029082	ENSMUSP00000030642	ENSMUSP00000033008	ENSMUSP00000034369	ENSMUSP00000034848	ENSMUSP00000051657	ENSMUSP00000071054	ENSMUSP00000088057	ENSMUSP00000099436	ENSMUSP00000125548	ENSMUSP00000129767	Psma1	Psma2	Psma3	Psma4	Psma5	Psma6	Psma7	Psmb1	Psmb10	Psmb2	Psmb3	Psmb4	Psmb5	Psmb6	Psmb7	Psmc3	Psmd8
MMU-174154	APC/C:Cdc20 mediated degradation of Securin	17	61	5.13e-20	ENSMUSP00000005923	ENSMUSP00000014913	ENSMUSP00000018430	ENSMUSP00000021412	ENSMUSP00000022803	ENSMUSP00000028083	ENSMUSP00000029082	ENSMUSP00000030642	ENSMUSP00000033008	ENSMUSP00000034369	ENSMUSP00000034848	ENSMUSP00000051657	ENSMUSP00000071054	ENSMUSP00000088057	ENSMUSP00000099436	ENSMUSP00000125548	ENSMUSP00000129767	Psma1	Psma2	Psma3	Psma4	Psma5	Psma6	Psma7	Psmb1	Psmb10	Psmb2	Psmb3	Psmb4	Psmb5	Psmb6	Psmb7	Psmc3	Psmd8
MMU-5658442	Regulation of RAS by GAPs	17	61	5.13e-20	ENSMUSP00000005923	ENSMUSP00000014913	ENSMUSP00000018430	ENSMUSP00000021412	ENSMUSP00000022803	ENSMUSP00000028083	ENSMUSP00000029082	ENSMUSP00000030642	ENSMUSP00000033008	ENSMUSP00000034369	ENSMUSP00000034848	ENSMUSP00000051657	ENSMUSP00000071054	ENSMUSP00000088057	ENSMUSP00000099436	ENSMUSP00000125548	ENSMUSP00000129767	Psma1	Psma2	Psma3	Psma4	Psma5	Psma6	Psma7	Psmb1	Psmb10	Psmb2	Psmb3	Psmb4	Psmb5	Psmb6	Psmb7	Psmc3	Psmd8
MMU-8939236	RUNX1 regulates transcription of genes involved in differentiation of HSCs	17	62	5.96e-20	ENSMUSP00000005923	ENSMUSP00000014913	ENSMUSP00000018430	ENSMUSP00000021412	ENSMUSP00000022803	ENSMUSP00000028083	ENSMUSP00000029082	ENSMUSP00000030642	ENSMUSP00000033008	ENSMUSP00000034369	ENSMUSP00000034848	ENSMUSP00000051657	ENSMUSP00000071054	ENSMUSP00000088057	ENSMUSP00000099436	ENSMUSP00000125548	ENSMUSP00000129767	Psma1	Psma2	Psma3	Psma4	Psma5	Psma6	Psma7	Psmb1	Psmb10	Psmb2	Psmb3	Psmb4	Psmb5	Psmb6	Psmb7	Psmc3	Psmd8
MMU-68949	Orc1 removal from chromatin	17	64	9.27e-20	ENSMUSP00000005923	ENSMUSP00000014913	ENSMUSP00000018430	ENSMUSP00000021412	ENSMUSP00000022803	ENSMUSP00000028083	ENSMUSP00000029082	ENSMUSP00000030642	ENSMUSP00000033008	ENSMUSP00000034369	ENSMUSP00000034848	ENSMUSP00000051657	ENSMUSP00000071054	ENSMUSP00000088057	ENSMUSP00000099436	ENSMUSP00000125548	ENSMUSP00000129767	Psma1	Psma2	Psma3	Psma4	Psma5	Psma6	Psma7	Psmb1	Psmb10	Psmb2	Psmb3	Psmb4	Psmb5	Psmb6	Psmb7	Psmc3	Psmd8
MMU-8948751	Regulation of PTEN stability and activity	17	64	9.27e-20	ENSMUSP00000005923	ENSMUSP00000014913	ENSMUSP00000018430	ENSMUSP00000021412	ENSMUSP00000022803	ENSMUSP00000028083	ENSMUSP00000029082	ENSMUSP00000030642	ENSMUSP00000033008	ENSMUSP00000034369	ENSMUSP00000034848	ENSMUSP00000051657	ENSMUSP00000071054	ENSMUSP00000088057	ENSMUSP00000099436	ENSMUSP00000125548	ENSMUSP00000129767	Psma1	Psma2	Psma3	Psma4	Psma5	Psma6	Psma7	Psmb1	Psmb10	Psmb2	Psmb3	Psmb4	Psmb5	Psmb6	Psmb7	Psmc3	Psmd8
MMU-174178	APC/C:Cdh1 mediated degradation of Cdc20 and other APC/C:Cdh1 targeted proteins in late mitosis/early G1	17	66	1.32e-19	ENSMUSP00000005923	ENSMUSP00000014913	ENSMUSP00000018430	ENSMUSP00000021412	ENSMUSP00000022803	ENSMUSP00000028083	ENSMUSP00000029082	ENSMUSP00000030642	ENSMUSP00000033008	ENSMUSP00000034369	ENSMUSP00000034848	ENSMUSP00000051657	ENSMUSP00000071054	ENSMUSP00000088057	ENSMUSP00000099436	ENSMUSP00000125548	ENSMUSP00000129767	Psma1	Psma2	Psma3	Psma4	Psma5	Psma6	Psma7	Psmb1	Psmb10	Psmb2	Psmb3	Psmb4	Psmb5	Psmb6	Psmb7	Psmc3	Psmd8
MMU-174184	Cdc20:Phospho-APC/C mediated degradation of Cyclin A	17	66	1.32e-19	ENSMUSP00000005923	ENSMUSP00000014913	ENSMUSP00000018430	ENSMUSP00000021412	ENSMUSP00000022803	ENSMUSP00000028083	ENSMUSP00000029082	ENSMUSP00000030642	ENSMUSP00000033008	ENSMUSP00000034369	ENSMUSP00000034848	ENSMUSP00000051657	ENSMUSP00000071054	ENSMUSP00000088057	ENSMUSP00000099436	ENSMUSP00000125548	ENSMUSP00000129767	Psma1	Psma2	Psma3	Psma4	Psma5	Psma6	Psma7	Psmb1	Psmb10	Psmb2	Psmb3	Psmb4	Psmb5	Psmb6	Psmb7	Psmc3	Psmd8
MMU-69017	CDK-mediated phosphorylation and removal of Cdc6	17	66	1.32e-19	ENSMUSP00000005923	ENSMUSP00000014913	ENSMUSP00000018430	ENSMUSP00000021412	ENSMUSP00000022803	ENSMUSP00000028083	ENSMUSP00000029082	ENSMUSP00000030642	ENSMUSP00000033008	ENSMUSP00000034369	ENSMUSP00000034848	ENSMUSP00000051657	ENSMUSP00000071054	ENSMUSP00000088057	ENSMUSP00000099436	ENSMUSP00000125548	ENSMUSP00000129767	Psma1	Psma2	Psma3	Psma4	Psma5	Psma6	Psma7	Psmb1	Psmb10	Psmb2	Psmb3	Psmb4	Psmb5	Psmb6	Psmb7	Psmc3	Psmd8
MMU-5607764	CLEC7A (Dectin-1) signaling	18	84	1.56e-19	ENSMUSP00000005923	ENSMUSP00000014913	ENSMUSP00000018430	ENSMUSP00000021412	ENSMUSP00000022803	ENSMUSP00000028083	ENSMUSP00000029082	ENSMUSP00000030642	ENSMUSP00000033008	ENSMUSP00000034369	ENSMUSP00000034848	ENSMUSP00000051657	ENSMUSP00000071054	ENSMUSP00000088057	ENSMUSP00000099436	ENSMUSP00000105709	ENSMUSP00000125548	ENSMUSP00000129767	Calm1	Psma1	Psma2	Psma3	Psma4	Psma5	Psma6	Psma7	Psmb1	Psmb10	Psmb2	Psmb3	Psmb4	Psmb5	Psmb6	Psmb7	Psmc3	Psmd8
MMU-5687128	MAPK6/MAPK4 signaling	17	67	1.56e-19	ENSMUSP00000005923	ENSMUSP00000014913	ENSMUSP00000018430	ENSMUSP00000021412	ENSMUSP00000022803	ENSMUSP00000028083	ENSMUSP00000029082	ENSMUSP00000030642	ENSMUSP00000033008	ENSMUSP00000034369	ENSMUSP00000034848	ENSMUSP00000051657	ENSMUSP00000071054	ENSMUSP00000088057	ENSMUSP00000099436	ENSMUSP00000125548	ENSMUSP00000129767	Psma1	Psma2	Psma3	Psma4	Psma5	Psma6	Psma7	Psmb1	Psmb10	Psmb2	Psmb3	Psmb4	Psmb5	Psmb6	Psmb7	Psmc3	Psmd8
MMU-71291	Metabolism of amino acids and derivatives	24	228	1.81e-19	ENSMUSP00000001304	ENSMUSP00000005923	ENSMUSP00000011058	ENSMUSP00000014913	ENSMUSP00000018430	ENSMUSP00000021412	ENSMUSP00000022268	ENSMUSP00000022803	ENSMUSP00000028083	ENSMUSP00000029082	ENSMUSP00000030642	ENSMUSP00000033008	ENSMUSP00000034369	ENSMUSP00000034567	ENSMUSP00000034848	ENSMUSP00000051657	ENSMUSP00000060346	ENSMUSP00000071054	ENSMUSP00000088057	ENSMUSP00000099436	ENSMUSP00000106481	ENSMUSP00000125548	ENSMUSP00000129704	ENSMUSP00000129767	Ckb	Dlat	Dld	Dlst	Enoph1	Pdhb	Pdhx	Psma1	Psma2	Psma3	Psma4	Psma5	Psma6	Psma7	Psmb1	Psmb10	Psmb2	Psmb3	Psmb4	Psmb5	Psmb6
MMU-9020702	Interleukin-1 signaling	18	86	2.11e-19	ENSMUSP00000005923	ENSMUSP00000014913	ENSMUSP00000018430	ENSMUSP00000021412	ENSMUSP00000022803	ENSMUSP00000028083	ENSMUSP00000029082	ENSMUSP00000030642	ENSMUSP00000033008	ENSMUSP00000034369	ENSMUSP00000034848	ENSMUSP00000047968	ENSMUSP00000051657	ENSMUSP00000071054	ENSMUSP00000088057	ENSMUSP00000099436	ENSMUSP00000125548	ENSMUSP00000129767	Psma1	Psma2	Psma3	Psma4	Psma5	Psma6	Psma7	Psmb1	Psmb10	Psmb2	Psmb3	Psmb4	Psmb5	Psmb6	Psmb7	Psmc3	Psmd8	S100b
MMU-195253	Degradation of beta-catenin by the destruction complex	17	72	3.81e-19	ENSMUSP00000005923	ENSMUSP00000014913	ENSMUSP00000018430	ENSMUSP00000021412	ENSMUSP00000022803	ENSMUSP00000028083	ENSMUSP00000029082	ENSMUSP00000030642	ENSMUSP00000033008	ENSMUSP00000034369	ENSMUSP00000034848	ENSMUSP00000051657	ENSMUSP00000071054	ENSMUSP00000088057	ENSMUSP00000099436	ENSMUSP00000125548	ENSMUSP00000129767	Psma1	Psma2	Psma3	Psma4	Psma5	Psma6	Psma7	Psmb1	Psmb10	Psmb2	Psmb3	Psmb4	Psmb5	Psmb6	Psmb7	Psmc3	Psmd8
MMU-2871837	FCERI mediated NF-kB activation	17	72	3.81e-19	ENSMUSP00000005923	ENSMUSP00000014913	ENSMUSP00000018430	ENSMUSP00000021412	ENSMUSP00000022803	ENSMUSP00000028083	ENSMUSP00000029082	ENSMUSP00000030642	ENSMUSP00000033008	ENSMUSP00000034369	ENSMUSP00000034848	ENSMUSP00000051657	ENSMUSP00000071054	ENSMUSP00000088057	ENSMUSP00000099436	ENSMUSP00000125548	ENSMUSP00000129767	Psma1	Psma2	Psma3	Psma4	Psma5	Psma6	Psma7	Psmb1	Psmb10	Psmb2	Psmb3	Psmb4	Psmb5	Psmb6	Psmb7	Psmc3	Psmd8
MMU-5610787	Hedgehog 'off' state	18	98	1.45e-18	ENSMUSP00000005923	ENSMUSP00000014913	ENSMUSP00000018430	ENSMUSP00000021412	ENSMUSP00000022803	ENSMUSP00000028083	ENSMUSP00000029082	ENSMUSP00000030642	ENSMUSP00000033008	ENSMUSP00000034369	ENSMUSP00000034848	ENSMUSP00000051033	ENSMUSP00000051657	ENSMUSP00000071054	ENSMUSP00000088057	ENSMUSP00000099436	ENSMUSP00000125548	ENSMUSP00000129767	Psma1	Psma2	Psma3	Psma4	Psma5	Psma6	Psma7	Psmb1	Psmb10	Psmb2	Psmb3	Psmb4	Psmb5	Psmb6	Psmb7	Psmc3	Psmd8	Tuba1c
MMU-5689603	UCH proteinases	17	80	1.69e-18	ENSMUSP00000005923	ENSMUSP00000014913	ENSMUSP00000018430	ENSMUSP00000021412	ENSMUSP00000022803	ENSMUSP00000028083	ENSMUSP00000029082	ENSMUSP00000030642	ENSMUSP00000033008	ENSMUSP00000034369	ENSMUSP00000034848	ENSMUSP00000051657	ENSMUSP00000071054	ENSMUSP00000088057	ENSMUSP00000099436	ENSMUSP00000125548	ENSMUSP00000129767	Psma1	Psma2	Psma3	Psma4	Psma5	Psma6	Psma7	Psmb1	Psmb10	Psmb2	Psmb3	Psmb4	Psmb5	Psmb6	Psmb7	Psmc3	Psmd8
MMU-202424	Downstream TCR signaling	17	81	1.95e-18	ENSMUSP00000005923	ENSMUSP00000014913	ENSMUSP00000018430	ENSMUSP00000021412	ENSMUSP00000022803	ENSMUSP00000028083	ENSMUSP00000029082	ENSMUSP00000030642	ENSMUSP00000033008	ENSMUSP00000034369	ENSMUSP00000034848	ENSMUSP00000051657	ENSMUSP00000071054	ENSMUSP00000088057	ENSMUSP00000099436	ENSMUSP00000125548	ENSMUSP00000129767	Psma1	Psma2	Psma3	Psma4	Psma5	Psma6	Psma7	Psmb1	Psmb10	Psmb2	Psmb3	Psmb4	Psmb5	Psmb6	Psmb7	Psmc3	Psmd8
MMU-5632684	Hedgehog 'on' state	18	105	3.81e-18	ENSMUSP00000005923	ENSMUSP00000014913	ENSMUSP00000018430	ENSMUSP00000021412	ENSMUSP00000022803	ENSMUSP00000028083	ENSMUSP00000029082	ENSMUSP00000030642	ENSMUSP00000033008	ENSMUSP00000034369	ENSMUSP00000034848	ENSMUSP00000051033	ENSMUSP00000051657	ENSMUSP00000071054	ENSMUSP00000088057	ENSMUSP00000099436	ENSMUSP00000125548	ENSMUSP00000129767	Psma1	Psma2	Psma3	Psma4	Psma5	Psma6	Psma7	Psmb1	Psmb10	Psmb2	Psmb3	Psmb4	Psmb5	Psmb6	Psmb7	Psmc3	Psmd8	Tuba1c
MMU-2454202	Fc epsilon receptor (FCERI) signaling	18	107	5.08e-18	ENSMUSP00000005923	ENSMUSP00000014913	ENSMUSP00000018430	ENSMUSP00000021412	ENSMUSP00000022803	ENSMUSP00000028083	ENSMUSP00000029082	ENSMUSP00000030642	ENSMUSP00000033008	ENSMUSP00000034369	ENSMUSP00000034848	ENSMUSP00000051657	ENSMUSP00000071054	ENSMUSP00000088057	ENSMUSP00000099436	ENSMUSP00000105709	ENSMUSP00000125548	ENSMUSP00000129767	Calm1	Psma1	Psma2	Psma3	Psma4	Psma5	Psma6	Psma7	Psmb1	Psmb10	Psmb2	Psmb3	Psmb4	Psmb5	Psmb6	Psmb7	Psmc3	Psmd8
MMU-195721	Signaling by WNT	23	241	6.38e-18	ENSMUSP00000005923	ENSMUSP00000014913	ENSMUSP00000018430	ENSMUSP00000021412	ENSMUSP00000022803	ENSMUSP00000028083	ENSMUSP00000029082	ENSMUSP00000030642	ENSMUSP00000033008	ENSMUSP00000034131	ENSMUSP00000034369	ENSMUSP00000034848	ENSMUSP00000036907	ENSMUSP00000051657	ENSMUSP00000071054	ENSMUSP00000088057	ENSMUSP00000090130	ENSMUSP00000099436	ENSMUSP00000105709	ENSMUSP00000121020	ENSMUSP00000124509	ENSMUSP00000125548	ENSMUSP00000129767	Calm1	H2afz	H3f3a	Psma1	Psma2	Psma3	Psma4	Psma5	Psma6	Psma7	Psmb1	Psmb10	Psmb2	Psmb3	Psmb4	Psmb5	Psmb6	Psmb7	Psmc3	Psmd8	Vps26a	Vps29
MMU-382556	ABC-family proteins mediated transport	17	91	9.74e-18	ENSMUSP00000005923	ENSMUSP00000014913	ENSMUSP00000018430	ENSMUSP00000021412	ENSMUSP00000022803	ENSMUSP00000028083	ENSMUSP00000029082	ENSMUSP00000030642	ENSMUSP00000033008	ENSMUSP00000034369	ENSMUSP00000034848	ENSMUSP00000051657	ENSMUSP00000071054	ENSMUSP00000088057	ENSMUSP00000099436	ENSMUSP00000125548	ENSMUSP00000129767	Psma1	Psma2	Psma3	Psma4	Psma5	Psma6	Psma7	Psmb1	Psmb10	Psmb2	Psmb3	Psmb4	Psmb5	Psmb6	Psmb7	Psmc3	Psmd8
MMU-3858494	Beta-catenin independent WNT signaling	18	116	1.76e-17	ENSMUSP00000005923	ENSMUSP00000014913	ENSMUSP00000018430	ENSMUSP00000021412	ENSMUSP00000022803	ENSMUSP00000028083	ENSMUSP00000029082	ENSMUSP00000030642	ENSMUSP00000033008	ENSMUSP00000034369	ENSMUSP00000034848	ENSMUSP00000051657	ENSMUSP00000071054	ENSMUSP00000088057	ENSMUSP00000099436	ENSMUSP00000105709	ENSMUSP00000125548	ENSMUSP00000129767	Calm1	Psma1	Psma2	Psma3	Psma4	Psma5	Psma6	Psma7	Psmb1	Psmb10	Psmb2	Psmb3	Psmb4	Psmb5	Psmb6	Psmb7	Psmc3	Psmd8
MMU-6791226	Major pathway of rRNA processing in the nucleolus and cytosol	17	102	5.09e-17	ENSMUSP00000003521	ENSMUSP00000006496	ENSMUSP00000008812	ENSMUSP00000025511	ENSMUSP00000029722	ENSMUSP00000032998	ENSMUSP00000054490	ENSMUSP00000058432	ENSMUSP00000069004	ENSMUSP00000076447	ENSMUSP00000079180	ENSMUSP00000103940	ENSMUSP00000110013	ENSMUSP00000110532	ENSMUSP00000119975	ENSMUSP00000120528	ENSMUSP00000126294	Rps10	Rps11	Rps13	Rps14	Rps15	Rps15a	Rps16	Rps18	Rps20	Rps21	Rps23	Rps25	Rps26-ps1	Rps28	Rps3	Rps3a1	Rps9
MMU-8878171	Transcriptional regulation by RUNX1	19	155	9.58e-17	ENSMUSP00000005923	ENSMUSP00000014913	ENSMUSP00000018430	ENSMUSP00000021412	ENSMUSP00000022803	ENSMUSP00000028083	ENSMUSP00000029082	ENSMUSP00000030642	ENSMUSP00000033008	ENSMUSP00000034369	ENSMUSP00000034848	ENSMUSP00000036907	ENSMUSP00000051657	ENSMUSP00000071054	ENSMUSP00000088057	ENSMUSP00000099436	ENSMUSP00000124509	ENSMUSP00000125548	ENSMUSP00000129767	H2afz	H3f3a	Psma1	Psma2	Psma3	Psma4	Psma5	Psma6	Psma7	Psmb1	Psmb10	Psmb2	Psmb3	Psmb4	Psmb5	Psmb6	Psmb7	Psmc3	Psmd8
MMU-201681	TCF dependent signaling in response to WNT	19	166	3e-16	ENSMUSP00000005923	ENSMUSP00000014913	ENSMUSP00000018430	ENSMUSP00000021412	ENSMUSP00000022803	ENSMUSP00000028083	ENSMUSP00000029082	ENSMUSP00000030642	ENSMUSP00000033008	ENSMUSP00000034369	ENSMUSP00000034848	ENSMUSP00000036907	ENSMUSP00000051657	ENSMUSP00000071054	ENSMUSP00000088057	ENSMUSP00000099436	ENSMUSP00000124509	ENSMUSP00000125548	ENSMUSP00000129767	H2afz	H3f3a	Psma1	Psma2	Psma3	Psma4	Psma5	Psma6	Psma7	Psmb1	Psmb10	Psmb2	Psmb3	Psmb4	Psmb5	Psmb6	Psmb7	Psmc3	Psmd8
MMU-69481	G2/M Checkpoints	17	128	1.41e-15	ENSMUSP00000005923	ENSMUSP00000014913	ENSMUSP00000018430	ENSMUSP00000021412	ENSMUSP00000022803	ENSMUSP00000028083	ENSMUSP00000029082	ENSMUSP00000030642	ENSMUSP00000033008	ENSMUSP00000034369	ENSMUSP00000034848	ENSMUSP00000051657	ENSMUSP00000071054	ENSMUSP00000088057	ENSMUSP00000099436	ENSMUSP00000125548	ENSMUSP00000129767	Psma1	Psma2	Psma3	Psma4	Psma5	Psma6	Psma7	Psmb1	Psmb10	Psmb2	Psmb3	Psmb4	Psmb5	Psmb6	Psmb7	Psmc3	Psmd8
MMU-5689880	Ub-specific processing proteases	18	157	1.91e-15	ENSMUSP00000005923	ENSMUSP00000014913	ENSMUSP00000018430	ENSMUSP00000021412	ENSMUSP00000022803	ENSMUSP00000028083	ENSMUSP00000029082	ENSMUSP00000030642	ENSMUSP00000033008	ENSMUSP00000034369	ENSMUSP00000034848	ENSMUSP00000051657	ENSMUSP00000071054	ENSMUSP00000088057	ENSMUSP00000099436	ENSMUSP00000125548	ENSMUSP00000129186	ENSMUSP00000129767	Psma1	Psma2	Psma3	Psma4	Psma5	Psma6	Psma7	Psmb1	Psmb10	Psmb2	Psmb3	Psmb4	Psmb5	Psmb6	Psmb7	Psmc3	Psmd8	Tomm70a
MMU-392499	Metabolism of proteins	44	1497	2.65e-15	ENSMUSP00000003521	ENSMUSP00000005923	ENSMUSP00000006496	ENSMUSP00000008812	ENSMUSP00000014913	ENSMUSP00000018430	ENSMUSP00000021412	ENSMUSP00000022803	ENSMUSP00000025511	ENSMUSP00000028083	ENSMUSP00000029082	ENSMUSP00000029722	ENSMUSP00000030642	ENSMUSP00000031314	ENSMUSP00000032998	ENSMUSP00000033008	ENSMUSP00000034369	ENSMUSP00000034848	ENSMUSP00000034856	ENSMUSP00000047008	ENSMUSP00000047678	ENSMUSP00000051033	ENSMUSP00000051657	ENSMUSP00000054490	ENSMUSP00000058432	ENSMUSP00000069004	ENSMUSP00000071054	ENSMUSP00000076447	ENSMUSP00000077733	ENSMUSP00000079180	ENSMUSP00000088057	ENSMUSP00000099436	ENSMUSP00000099902	ENSMUSP00000103940	ENSMUSP00000105709	ENSMUSP00000110013	ENSMUSP00000110532	ENSMUSP00000119975	ENSMUSP00000120528	ENSMUSP00000125548	ENSMUSP00000126294	ENSMUSP00000127774	ENSMUSP00000129186	ENSMUSP00000129767	Alb
MMU-449147	Signaling by Interleukins	21	262	4.64e-15	ENSMUSP00000005509	ENSMUSP00000005923	ENSMUSP00000014913	ENSMUSP00000018430	ENSMUSP00000021273	ENSMUSP00000021412	ENSMUSP00000022803	ENSMUSP00000028083	ENSMUSP00000028727	ENSMUSP00000029082	ENSMUSP00000030642	ENSMUSP00000033008	ENSMUSP00000034369	ENSMUSP00000034848	ENSMUSP00000047968	ENSMUSP00000051657	ENSMUSP00000071054	ENSMUSP00000088057	ENSMUSP00000099436	ENSMUSP00000125548	ENSMUSP00000129767	Psma1	Psma2	Psma3	Psma4	Psma5	Psma6	Psma7	Psmb1	Psmb10	Psmb2	Psmb3	Psmb4	Psmb5	Psmb6	Psmb7	Psmc3	Psmd8	S100b	Snap25	Stx1a	Vamp2
MMU-2467813	Separation of Sister Chromatids	18	169	5.98e-15	ENSMUSP00000005923	ENSMUSP00000014913	ENSMUSP00000018430	ENSMUSP00000021412	ENSMUSP00000022803	ENSMUSP00000028083	ENSMUSP00000029082	ENSMUSP00000030642	ENSMUSP00000033008	ENSMUSP00000034369	ENSMUSP00000034848	ENSMUSP00000051033	ENSMUSP00000051657	ENSMUSP00000071054	ENSMUSP00000088057	ENSMUSP00000099436	ENSMUSP00000125548	ENSMUSP00000129767	Psma1	Psma2	Psma3	Psma4	Psma5	Psma6	Psma7	Psmb1	Psmb10	Psmb2	Psmb3	Psmb4	Psmb5	Psmb6	Psmb7	Psmc3	Psmd8	Tuba1c
MMU-5673001	RAF/MAP kinase cascade	19	213	1.8e-14	ENSMUSP00000005923	ENSMUSP00000014913	ENSMUSP00000018430	ENSMUSP00000021412	ENSMUSP00000022803	ENSMUSP00000028083	ENSMUSP00000029082	ENSMUSP00000030642	ENSMUSP00000033008	ENSMUSP00000034369	ENSMUSP00000034848	ENSMUSP00000051657	ENSMUSP00000071054	ENSMUSP00000088057	ENSMUSP00000099436	ENSMUSP00000099902	ENSMUSP00000105709	ENSMUSP00000125548	ENSMUSP00000129767	Calm1	Psma1	Psma2	Psma3	Psma4	Psma5	Psma6	Psma7	Psmb1	Psmb10	Psmb2	Psmb3	Psmb4	Psmb5	Psmb6	Psmb7	Psmc3	Psmd8	Sptbn1
MMU-2262752	Cellular responses to stress	22	327	2.59e-14	ENSMUSP00000005923	ENSMUSP00000014913	ENSMUSP00000018430	ENSMUSP00000021412	ENSMUSP00000022803	ENSMUSP00000025486	ENSMUSP00000028083	ENSMUSP00000029082	ENSMUSP00000030642	ENSMUSP00000033008	ENSMUSP00000034369	ENSMUSP00000034848	ENSMUSP00000036907	ENSMUSP00000051033	ENSMUSP00000051657	ENSMUSP00000071054	ENSMUSP00000074392	ENSMUSP00000088057	ENSMUSP00000099436	ENSMUSP00000124509	ENSMUSP00000125548	ENSMUSP00000129767	H2afz	H3f3a	Hsph1	Lmnb1	Psma1	Psma2	Psma3	Psma4	Psma5	Psma6	Psma7	Psmb1	Psmb10	Psmb2	Psmb3	Psmb4	Psmb5	Psmb6	Psmb7	Psmc3	Psmd8	Tuba1c
MMU-8953897	Cellular responses to external stimuli	23	382	5.51e-14	ENSMUSP00000005923	ENSMUSP00000014913	ENSMUSP00000018430	ENSMUSP00000021412	ENSMUSP00000022803	ENSMUSP00000025486	ENSMUSP00000028083	ENSMUSP00000029082	ENSMUSP00000030642	ENSMUSP00000033008	ENSMUSP00000034211	ENSMUSP00000034369	ENSMUSP00000034848	ENSMUSP00000036907	ENSMUSP00000051033	ENSMUSP00000051657	ENSMUSP00000071054	ENSMUSP00000074392	ENSMUSP00000088057	ENSMUSP00000099436	ENSMUSP00000124509	ENSMUSP00000125548	ENSMUSP00000129767	H2afz	H3f3a	Hsph1	Lmnb1	Mt3	Psma1	Psma2	Psma3	Psma4	Psma5	Psma6	Psma7	Psmb1	Psmb10	Psmb2	Psmb3	Psmb4	Psmb5	Psmb6	Psmb7	Psmc3	Psmd8
MMU-1280215	Cytokine Signaling in Immune system	22	357	1.37e-13	ENSMUSP00000005509	ENSMUSP00000005923	ENSMUSP00000014913	ENSMUSP00000018430	ENSMUSP00000021273	ENSMUSP00000021412	ENSMUSP00000022803	ENSMUSP00000028083	ENSMUSP00000028727	ENSMUSP00000029082	ENSMUSP00000030642	ENSMUSP00000033008	ENSMUSP00000034369	ENSMUSP00000034848	ENSMUSP00000047678	ENSMUSP00000047968	ENSMUSP00000051657	ENSMUSP00000071054	ENSMUSP00000088057	ENSMUSP00000099436	ENSMUSP00000125548	ENSMUSP00000129767	Eif4g1	Psma1	Psma2	Psma3	Psma4	Psma5	Psma6	Psma7	Psmb1	Psmb10	Psmb2	Psmb3	Psmb4	Psmb5	Psmb6	Psmb7	Psmc3	Psmd8	S100b	Snap25	Stx1a	Vamp2
MMU-68886	M Phase	21	317	1.42e-13	ENSMUSP00000005923	ENSMUSP00000014913	ENSMUSP00000018430	ENSMUSP00000021412	ENSMUSP00000022803	ENSMUSP00000025486	ENSMUSP00000028083	ENSMUSP00000029082	ENSMUSP00000030642	ENSMUSP00000033008	ENSMUSP00000034369	ENSMUSP00000034848	ENSMUSP00000036907	ENSMUSP00000051033	ENSMUSP00000051657	ENSMUSP00000071054	ENSMUSP00000088057	ENSMUSP00000099436	ENSMUSP00000124509	ENSMUSP00000125548	ENSMUSP00000129767	H2afz	H3f3a	Lmnb1	Psma1	Psma2	Psma3	Psma4	Psma5	Psma6	Psma7	Psmb1	Psmb10	Psmb2	Psmb3	Psmb4	Psmb5	Psmb6	Psmb7	Psmc3	Psmd8	Tuba1c
MMU-9006925	Intracellular signaling by second messengers	18	227	5.96e-13	ENSMUSP00000005923	ENSMUSP00000014913	ENSMUSP00000018430	ENSMUSP00000021412	ENSMUSP00000022803	ENSMUSP00000028083	ENSMUSP00000029082	ENSMUSP00000030642	ENSMUSP00000033008	ENSMUSP00000034369	ENSMUSP00000034848	ENSMUSP00000051657	ENSMUSP00000071054	ENSMUSP00000088057	ENSMUSP00000099436	ENSMUSP00000105709	ENSMUSP00000125548	ENSMUSP00000129767	Calm1	Psma1	Psma2	Psma3	Psma4	Psma5	Psma6	Psma7	Psmb1	Psmb10	Psmb2	Psmb3	Psmb4	Psmb5	Psmb6	Psmb7	Psmc3	Psmd8
MMU-8951664	Neddylation	17	230	8.21e-12	ENSMUSP00000005923	ENSMUSP00000014913	ENSMUSP00000018430	ENSMUSP00000021412	ENSMUSP00000022803	ENSMUSP00000028083	ENSMUSP00000029082	ENSMUSP00000030642	ENSMUSP00000033008	ENSMUSP00000034369	ENSMUSP00000034848	ENSMUSP00000051657	ENSMUSP00000071054	ENSMUSP00000088057	ENSMUSP00000099436	ENSMUSP00000125548	ENSMUSP00000129767	Psma1	Psma2	Psma3	Psma4	Psma5	Psma6	Psma7	Psmb1	Psmb10	Psmb2	Psmb3	Psmb4	Psmb5	Psmb6	Psmb7	Psmc3	Psmd8
MMU-1430728	Metabolism	40	1685	4.94e-11	ENSMUSP00000001304	ENSMUSP00000005923	ENSMUSP00000011058	ENSMUSP00000014913	ENSMUSP00000016396	ENSMUSP00000018430	ENSMUSP00000019323	ENSMUSP00000021412	ENSMUSP00000022268	ENSMUSP00000022573	ENSMUSP00000022803	ENSMUSP00000023608	ENSMUSP00000028083	ENSMUSP00000029082	ENSMUSP00000030642	ENSMUSP00000031314	ENSMUSP00000033008	ENSMUSP00000034369	ENSMUSP00000034567	ENSMUSP00000034848	ENSMUSP00000051222	ENSMUSP00000051657	ENSMUSP00000060346	ENSMUSP00000071054	ENSMUSP00000084846	ENSMUSP00000088057	ENSMUSP00000099436	ENSMUSP00000100045	ENSMUSP00000101006	ENSMUSP00000105709	ENSMUSP00000106481	ENSMUSP00000110434	ENSMUSP00000113022	ENSMUSP00000114705	ENSMUSP00000120976	ENSMUSP00000125504	ENSMUSP00000125548	ENSMUSP00000129704	ENSMUSP00000129767	ENSMUSP00000130898	Akr1b3	Alb	Aldoa	Atp5d	Atp5e
MMU-983168	Antigen processing: Ubiquitination & Proteasome degradation	17	295	3.2e-10	ENSMUSP00000005923	ENSMUSP00000014913	ENSMUSP00000018430	ENSMUSP00000021412	ENSMUSP00000022803	ENSMUSP00000028083	ENSMUSP00000029082	ENSMUSP00000030642	ENSMUSP00000033008	ENSMUSP00000034369	ENSMUSP00000034848	ENSMUSP00000051657	ENSMUSP00000071054	ENSMUSP00000088057	ENSMUSP00000099436	ENSMUSP00000125548	ENSMUSP00000129767	Psma1	Psma2	Psma3	Psma4	Psma5	Psma6	Psma7	Psmb1	Psmb10	Psmb2	Psmb3	Psmb4	Psmb5	Psmb6	Psmb7	Psmc3	Psmd8
MMU-1428517	The citric acid (TCA) cycle and respiratory electron transport	12	129	1.3e-09	ENSMUSP00000011058	ENSMUSP00000016396	ENSMUSP00000019323	ENSMUSP00000022268	ENSMUSP00000023608	ENSMUSP00000034567	ENSMUSP00000051222	ENSMUSP00000060346	ENSMUSP00000101006	ENSMUSP00000106481	ENSMUSP00000113022	ENSMUSP00000125504	Atp5d	Atp5e	Atp5f1	Atp5j	Atp5j2	Atp5k	Dlat	Dld	Dlst	Mdh2	Pdhb	Pdhx
MMU-181429	Serotonin Neurotransmitter Release Cycle	6	16	2.57e-08	ENSMUSP00000005509	ENSMUSP00000009538	ENSMUSP00000021273	ENSMUSP00000028727	ENSMUSP00000089051	ENSMUSP00000100912	Snap25	Stx1a	Stxbp1	Syn2	Syt1	Vamp2
MMU-163210	Formation of ATP by chemiosmotic coupling	6	17	3.43e-08	ENSMUSP00000016396	ENSMUSP00000023608	ENSMUSP00000051222	ENSMUSP00000101006	ENSMUSP00000113022	ENSMUSP00000125504	Atp5d	Atp5e	Atp5f1	Atp5j	Atp5j2	Atp5k
MMU-8949613	Cristae formation	6	17	3.43e-08	ENSMUSP00000016396	ENSMUSP00000023608	ENSMUSP00000051222	ENSMUSP00000101006	ENSMUSP00000113022	ENSMUSP00000125504	Atp5d	Atp5e	Atp5f1	Atp5j	Atp5j2	Atp5k
MMU-212676	Dopamine Neurotransmitter Release Cycle	6	21	9.68e-08	ENSMUSP00000005509	ENSMUSP00000009538	ENSMUSP00000021273	ENSMUSP00000028727	ENSMUSP00000089051	ENSMUSP00000100912	Snap25	Stx1a	Stxbp1	Syn2	Syt1	Vamp2
MMU-382551	Transport of small molecules	20	624	1.08e-07	ENSMUSP00000005923	ENSMUSP00000014913	ENSMUSP00000018430	ENSMUSP00000021412	ENSMUSP00000022803	ENSMUSP00000028083	ENSMUSP00000029082	ENSMUSP00000030642	ENSMUSP00000031314	ENSMUSP00000033008	ENSMUSP00000034369	ENSMUSP00000034848	ENSMUSP00000051657	ENSMUSP00000071054	ENSMUSP00000088057	ENSMUSP00000099436	ENSMUSP00000104906	ENSMUSP00000105709	ENSMUSP00000125548	ENSMUSP00000129767	Alb	Calm1	Psma1	Psma2	Psma3	Psma4	Psma5	Psma6	Psma7	Psmb1	Psmb10	Psmb2	Psmb3	Psmb4	Psmb5	Psmb6	Psmb7	Psmc3	Psmd8	Slc2a13
MMU-1280218	Adaptive Immune System	20	652	2.15e-07	ENSMUSP00000005923	ENSMUSP00000014913	ENSMUSP00000018430	ENSMUSP00000021412	ENSMUSP00000022803	ENSMUSP00000028083	ENSMUSP00000029082	ENSMUSP00000030212	ENSMUSP00000030642	ENSMUSP00000033008	ENSMUSP00000034369	ENSMUSP00000034848	ENSMUSP00000051033	ENSMUSP00000051657	ENSMUSP00000071054	ENSMUSP00000088057	ENSMUSP00000099436	ENSMUSP00000105709	ENSMUSP00000125548	ENSMUSP00000129767	Calm1	Psma1	Psma2	Psma3	Psma4	Psma5	Psma6	Psma7	Psmb1	Psmb10	Psmb2	Psmb3	Psmb4	Psmb5	Psmb6	Psmb7	Psmc3	Psmd8	Sh3gl2	Tuba1c
MMU-264642	Acetylcholine Neurotransmitter Release Cycle	5	13	4.14e-07	ENSMUSP00000005509	ENSMUSP00000021273	ENSMUSP00000028727	ENSMUSP00000089051	ENSMUSP00000100912	Snap25	Stx1a	Stxbp1	Syt1	Vamp2
MMU-181430	Norepinephrine Neurotransmitter Release Cycle	5	16	9.6e-07	ENSMUSP00000005509	ENSMUSP00000021273	ENSMUSP00000028727	ENSMUSP00000089051	ENSMUSP00000100912	Snap25	Stx1a	Stxbp1	Syt1	Vamp2
MMU-888590	GABA synthesis release reuptake and degradation	5	16	9.6e-07	ENSMUSP00000005509	ENSMUSP00000021273	ENSMUSP00000028727	ENSMUSP00000089051	ENSMUSP00000100912	Snap25	Stx1a	Stxbp1	Syt1	Vamp2
MMU-168249	Innate Immune System	22	879	1.33e-06	ENSMUSP00000005923	ENSMUSP00000014913	ENSMUSP00000018430	ENSMUSP00000021412	ENSMUSP00000022803	ENSMUSP00000028083	ENSMUSP00000028727	ENSMUSP00000029082	ENSMUSP00000030642	ENSMUSP00000033008	ENSMUSP00000034369	ENSMUSP00000034848	ENSMUSP00000035743	ENSMUSP00000047968	ENSMUSP00000051657	ENSMUSP00000071054	ENSMUSP00000084846	ENSMUSP00000088057	ENSMUSP00000099436	ENSMUSP00000105709	ENSMUSP00000125548	ENSMUSP00000129767	Aldoa	Calm1	Psma1	Psma2	Psma3	Psma4	Psma5	Psma6	Psma7	Psmb1	Psmb10	Psmb2	Psmb3	Psmb4	Psmb5	Psmb6	Psmb7	Psmc3	Psmd8	Pygb	S100b	Snap25
MMU-210500	Glutamate Neurotransmitter Release Cycle	5	21	2.93e-06	ENSMUSP00000005509	ENSMUSP00000021273	ENSMUSP00000028727	ENSMUSP00000089051	ENSMUSP00000100912	Snap25	Stx1a	Stxbp1	Syt1	Vamp2
MMU-597592	Post-translational protein modification	25	1211	6.34e-06	ENSMUSP00000005923	ENSMUSP00000014913	ENSMUSP00000018430	ENSMUSP00000021412	ENSMUSP00000022803	ENSMUSP00000028083	ENSMUSP00000029082	ENSMUSP00000030642	ENSMUSP00000031314	ENSMUSP00000033008	ENSMUSP00000034369	ENSMUSP00000034848	ENSMUSP00000034856	ENSMUSP00000047008	ENSMUSP00000051033	ENSMUSP00000051657	ENSMUSP00000071054	ENSMUSP00000077733	ENSMUSP00000088057	ENSMUSP00000099436	ENSMUSP00000099902	ENSMUSP00000105709	ENSMUSP00000125548	ENSMUSP00000129186	ENSMUSP00000129767	Alb	Calm1	Dhps	Eif5a	Mpi	Psma1	Psma2	Psma3	Psma4	Psma5	Psma6	Psma7	Psmb1	Psmb10	Psmb2	Psmb3	Psmb4	Psmb5	Psmb6	Psmb7
MMU-71406	Pyruvate metabolism and Citric Acid (TCA) cycle	6	51	9.05e-06	ENSMUSP00000011058	ENSMUSP00000019323	ENSMUSP00000022268	ENSMUSP00000034567	ENSMUSP00000060346	ENSMUSP00000106481	Dlat	Dld	Dlst	Mdh2	Pdhb	Pdhx
MMU-389661	Glyoxylate metabolism and glycine degradation	5	28	9.8e-06	ENSMUSP00000011058	ENSMUSP00000022268	ENSMUSP00000034567	ENSMUSP00000060346	ENSMUSP00000106481	Dlat	Dld	Dlst	Pdhb	Pdhx
MMU-204174	Regulation of pyruvate dehydrogenase (PDH) complex	4	16	3.08e-05	ENSMUSP00000011058	ENSMUSP00000022268	ENSMUSP00000034567	ENSMUSP00000106481	Dlat	Dld	Pdhb	Pdhx
MMU-168256	Immune System	27	1523	3.65e-05	ENSMUSP00000005509	ENSMUSP00000005923	ENSMUSP00000014913	ENSMUSP00000018430	ENSMUSP00000021273	ENSMUSP00000021412	ENSMUSP00000022803	ENSMUSP00000028083	ENSMUSP00000028727	ENSMUSP00000029082	ENSMUSP00000030212	ENSMUSP00000030642	ENSMUSP00000033008	ENSMUSP00000034369	ENSMUSP00000034848	ENSMUSP00000035743	ENSMUSP00000047678	ENSMUSP00000047968	ENSMUSP00000051033	ENSMUSP00000051657	ENSMUSP00000071054	ENSMUSP00000084846	ENSMUSP00000088057	ENSMUSP00000099436	ENSMUSP00000105709	ENSMUSP00000125548	ENSMUSP00000129767	Aldoa	Calm1	Eif4g1	Psma1	Psma2	Psma3	Psma4	Psma5	Psma6	Psma7	Psmb1	Psmb10	Psmb2	Psmb3	Psmb4	Psmb5	Psmb6	Psmb7
MMU-77285	Beta oxidation of myristoyl-CoA to lauroyl-CoA	2	2	0.00081	ENSMUSP00000110434	ENSMUSP00000120976	Hadha	Hadhb
MMU-449836	Other interleukin signaling	3	18	0.0012	ENSMUSP00000005509	ENSMUSP00000021273	ENSMUSP00000028727	Snap25	Stx1a	Vamp2
MMU-112315	Transmission across Chemical Synapses	7	187	0.0013	ENSMUSP00000005509	ENSMUSP00000009538	ENSMUSP00000021273	ENSMUSP00000028727	ENSMUSP00000089051	ENSMUSP00000100912	ENSMUSP00000105709	Calm1	Snap25	Stx1a	Stxbp1	Syn2	Syt1	Vamp2
MMU-77305	Beta oxidation of palmitoyl-CoA to myristoyl-CoA	2	3	0.0013	ENSMUSP00000110434	ENSMUSP00000120976	Hadha	Hadhb
MMU-162582	Signal Transduction	32	2430	0.0014	ENSMUSP00000005923	ENSMUSP00000011058	ENSMUSP00000014913	ENSMUSP00000018430	ENSMUSP00000021412	ENSMUSP00000022268	ENSMUSP00000022803	ENSMUSP00000028083	ENSMUSP00000029082	ENSMUSP00000030212	ENSMUSP00000030642	ENSMUSP00000033008	ENSMUSP00000034131	ENSMUSP00000034369	ENSMUSP00000034567	ENSMUSP00000034848	ENSMUSP00000036907	ENSMUSP00000047678	ENSMUSP00000051033	ENSMUSP00000051657	ENSMUSP00000071054	ENSMUSP00000088057	ENSMUSP00000090130	ENSMUSP00000099436	ENSMUSP00000099902	ENSMUSP00000105709	ENSMUSP00000106481	ENSMUSP00000121020	ENSMUSP00000124509	ENSMUSP00000125548	ENSMUSP00000127774	ENSMUSP00000129767	Calm1	Dlat	Dld	Eif4b	Eif4g1	H2afz	H3f3a	Pdhb	Pdhx	Psma1	Psma2	Psma3	Psma4
MMU-9006931	Signaling by Nuclear Receptors	6	135	0.0014	ENSMUSP00000011058	ENSMUSP00000022268	ENSMUSP00000034567	ENSMUSP00000036907	ENSMUSP00000106481	ENSMUSP00000124509	Dlat	Dld	H2afz	H3f3a	Pdhb	Pdhx
MMU-1852241	Organelle biogenesis and maintenance	7	199	0.0018	ENSMUSP00000016396	ENSMUSP00000023608	ENSMUSP00000051033	ENSMUSP00000051222	ENSMUSP00000101006	ENSMUSP00000113022	ENSMUSP00000125504	Atp5d	Atp5e	Atp5f1	Atp5j	Atp5j2	Atp5k	Tuba1c
MMU-204626	Hypusine synthesis from eIF5A-lysine	2	4	0.0019	ENSMUSP00000047008	ENSMUSP00000077733	Dhps	Eif5a
MMU-71403	Citric acid cycle (TCA cycle)	3	22	0.0019	ENSMUSP00000019323	ENSMUSP00000060346	ENSMUSP00000106481	Dld	Dlst	Mdh2
MMU-77310	Beta oxidation of lauroyl-CoA to decanoyl-CoA-CoA	2	4	0.0019	ENSMUSP00000110434	ENSMUSP00000120976	Hadha	Hadhb
MMU-3238698	WNT ligand biogenesis and trafficking	3	23	0.0021	ENSMUSP00000034131	ENSMUSP00000090130	ENSMUSP00000121020	Vps26a	Vps29	Vps35
MMU-5362517	Signaling by Retinoic Acid	4	56	0.0022	ENSMUSP00000011058	ENSMUSP00000022268	ENSMUSP00000034567	ENSMUSP00000106481	Dlat	Dld	Pdhb	Pdhx
MMU-1482798	Acyl chain remodeling of CL	2	5	0.0026	ENSMUSP00000110434	ENSMUSP00000120976	Hadha	Hadhb
MMU-77348	Beta oxidation of octanoyl-CoA to hexanoyl-CoA	2	5	0.0026	ENSMUSP00000110434	ENSMUSP00000120976	Hadha	Hadhb
MMU-77350	Beta oxidation of hexanoyl-CoA to butanoyl-CoA	2	5	0.0026	ENSMUSP00000110434	ENSMUSP00000120976	Hadha	Hadhb
MMU-77346	Beta oxidation of decanoyl-CoA to octanoyl-CoA-CoA	2	6	0.0034	ENSMUSP00000110434	ENSMUSP00000120976	Hadha	Hadhb
MMU-373760	L1CAM interactions	4	64	0.0035	ENSMUSP00000022629	ENSMUSP00000030212	ENSMUSP00000051033	ENSMUSP00000099902	Dpysl2	Sh3gl2	Sptbn1	Tuba1c
MMU-437239	Recycling pathway of L1	3	33	0.0052	ENSMUSP00000022629	ENSMUSP00000030212	ENSMUSP00000051033	Dpysl2	Sh3gl2	Tuba1c
MMU-77289	Mitochondrial Fatty Acid Beta-Oxidation	3	36	0.0065	ENSMUSP00000110434	ENSMUSP00000114705	ENSMUSP00000120976	Dbi	Hadha	Hadhb
MMU-71064	Lysine catabolism	2	12	0.0104	ENSMUSP00000060346	ENSMUSP00000106481	Dld	Dlst
MMU-5205685	Pink/Parkin Mediated Mitophagy	2	19	0.023	ENSMUSP00000023062	ENSMUSP00000129186	Tomm22	Tomm70a
MMU-166208	mTORC1-mediated signalling	2	21	0.0273	ENSMUSP00000047678	ENSMUSP00000127774	Eif4b	Eif4g1
MMU-427413	NoRC negatively regulates rRNA expression	2	21	0.0273	ENSMUSP00000036907	ENSMUSP00000124509	H2afz	H3f3a
MMU-114608	Platelet degranulation	4	121	0.0287	ENSMUSP00000031314	ENSMUSP00000084846	ENSMUSP00000105709	ENSMUSP00000107795	Alb	Aldoa	Calm1	Tmsb4x
MMU-73728	RNA Polymerase I Promoter Opening	2	22	0.0291	ENSMUSP00000036907	ENSMUSP00000124509	H2afz	H3f3a
MMU-427359	SIRT1 negatively regulates rRNA expression	2	23	0.0313	ENSMUSP00000036907	ENSMUSP00000124509	H2afz	H3f3a
MMU-429947	Deadenylation of mRNA	2	25	0.0357	ENSMUSP00000047678	ENSMUSP00000127774	Eif4b	Eif4g1
MMU-5625886	Activated PKN1 stimulates transcription of AR (androgen receptor) regulated genes KLK2 and KLK3	2	25	0.0357	ENSMUSP00000036907	ENSMUSP00000124509	H2afz	H3f3a
MMU-5626467	RHO GTPases activate IQGAPs	2	25	0.0357	ENSMUSP00000051033	ENSMUSP00000105709	Calm1	Tuba1c
MMU-432720	Lysosome Vesicle Biogenesis	2	28	0.0427	ENSMUSP00000021273	ENSMUSP00000030212	Sh3gl2	Vamp2
[truncated: 57 more columns]

## Sheet: CTD-MZ
Pathway	Pathway ID	P-value	Corrected P-value	Annotated Genes Quantity	Annotated Genes	Genome Frequency
Hepatitis B	KEGG:hsa05161	1.07e-37	8.57e-35	22	AKT1|APAF1|BAX|BCL2|CASP3|CASP8|CASP9|CCND1|CDKN1A|CREB1|CXCL8|CYCS|ELK1|FAS|FASLG|MAPK1|MAPK3|MYC|PTK2B|RELA|TNF|TP53	144/43622 genes: 0,33%
Apoptosis	KEGG:hsa04210	1.51e-29	1.21e-26	18	ACTG1|AKT1|APAF1|BAX|BCL2|CASP3|CASP7|CASP8|CASP9|CYCS|FAS|FASLG|GADD45A|MAPK1|MAPK3|RELA|TNF|TP53	138/43622 genes: 0,32%
Pathways in cancer	KEGG:hsa05200	2.01e-29	1.62e-26	23	AKT1|AR|BAX|BCL2|CASP3|CASP8|CASP9|CCND1|CDKN1A|CXCL8|CYCS|FAS|FASLG|GSK3B|HSP90AB1|MAPK1|MAPK3|MDM2|MYC|NOS2|PTGS2|RELA|TP53	395/43622 genes: 0,91%
Platinum drug resistance	KEGG:hsa01524	6.54e-28	5.25e-25	15	AKT1|APAF1|BAX|BCL2|CASP3|CASP8|CASP9|CDKN1A|CYCS|FAS|FASLG|MAPK1|MAPK3|MDM2|TP53	73/43622 genes: 0,17%
PI3K-Akt signaling pathway	KEGG:hsa04151	1.22e-25	9.82e-23	20	AKT1|BCL2|CASP9|CCND1|CDKN1A|CREB1|DDIT4|FASLG|GSK3B|HSP90AB1|IL2|KDR|MAPK1|MAPK3|MDM2|MYC|PRL|RELA|TEK|TP53	341/43622 genes: 0,78%
Immune System	REACT:R-HSA-168256	1.94e-25	1.55e-22	34	ACTG1|AKT1|ANXA2|APAF1|BCL2|CASP3|CASP8|CASP9|CAT|CCND1|CDKN1A|CREB1|CXCL8|ELK1|FASLG|GSK3B|HSP90AB1|IFNG|IL1B|IL2|MAPK1|MAPK3|MDM2|MYC|NOS2|PLAUR|PRL|PTGS2|PTK2B|RELA|S100A9|TEK|TNF|TP53	2118/43622 genes: 4,86%
Prostate cancer	KEGG:hsa05215	1.76e-24	1.42e-21	14	AKT1|AR|BCL2|CASP9|CCND1|CDKN1A|CREB1|GSK3B|HSP90AB1|MAPK1|MAPK3|MDM2|RELA|TP53	87/43622 genes: 0,20%
Tuberculosis	KEGG:hsa05152	1.28e-23	1.03e-20	16	AKT1|APAF1|BAX|BCL2|CASP3|CASP8|CASP9|CREB1|CYCS|IFNG|IL1B|MAPK1|MAPK3|NOS2|RELA|TNF	178/43622 genes: 0,41%
Proteoglycans in cancer	KEGG:hsa05205	1.11e-22	8.89e-20	16	ACTG1|AKT1|CASP3|CCND1|CDKN1A|ELK1|FAS|FASLG|KDR|MAPK1|MAPK3|MDM2|MYC|PLAUR|TNF|TP53	203/43622 genes: 0,47%
Colorectal cancer	KEGG:hsa05210	2.44e-22	1.96e-19	12	AKT1|BAX|BCL2|CASP3|CASP9|CCND1|CYCS|GSK3B|MAPK1|MAPK3|MYC|TP53	60/43622 genes: 0,14%
IL-17 signaling pathway	KEGG:hsa04657	6.09e-22	4.89e-19	13	CASP3|CASP8|CXCL8|GSK3B|HSP90AB1|IFNG|IL1B|MAPK1|MAPK3|PTGS2|RELA|S100A9|TNF	93/43622 genes: 0,21%
p53 signaling pathway	KEGG:hsa04115	1.52e-21	1.22e-18	12	APAF1|BAX|CASP3|CASP8|CASP9|CCND1|CDKN1A|CYCS|FAS|GADD45A|MDM2|TP53	69/43622 genes: 0,16%
Chagas disease (American trypanosomiasis)	KEGG:hsa05142	2.17e-21	1.74e-18	13	AKT1|CASP8|CXCL8|FAS|FASLG|IFNG|IL1B|IL2|MAPK1|MAPK3|NOS2|RELA|TNF	102/43622 genes: 0,23%
Amyotrophic lateral sclerosis (ALS)	KEGG:hsa05014	5.91e-21	4.74e-18	11	APAF1|BAX|BCL2|CASP3|CASP9|CAT|CYCS|GPX1|SOD1|TNF|TP53	51/43622 genes: 0,12%
Signal Transduction	REACT:R-HSA-162582	2.11e-20	1.7e-17	32	ACTG1|AKT1|AR|CASP3|CASP8|CASP9|CCND1|CDC25C|CDKN1A|CREB1|CXCL8|ELK1|FAS|FASLG|GSK3B|HCRTR1|HDAC3|HDAC6|HNRNPM|IL2|KDR|KISS1|MAPK1|MAPK3|MDM2|MYC|PTK2B|RELA|TEK|TNF|TP53|TSHB	2587/43622 genes: 5,93%
Signaling by Interleukins	REACT:R-HSA-449147	2.37e-20	1.91e-17	19	AKT1|BCL2|CASP3|CCND1|CDKN1A|CXCL8|FASLG|IL1B|IL2|MAPK1|MAPK3|MYC|NOS2|PTGS2|PTK2B|RELA|TEK|TNF|TP53	528/43622 genes: 1,21%
Cytokine Signaling in Immune system	REACT:R-HSA-1280215	4.09e-20	3.28e-17	21	AKT1|BCL2|CASP3|CCND1|CDKN1A|CXCL8|FASLG|IFNG|IL1B|IL2|MAPK1|MAPK3|MYC|NOS2|PRL|PTGS2|PTK2B|RELA|TEK|TNF|TP53	760/43622 genes: 1,74%
Influenza A	KEGG:hsa05164	4.2e-20	3.38e-17	14	ACTG1|AKT1|CASP9|CXCL8|CYCS|FAS|FASLG|GSK3B|IFNG|IL1B|MAPK1|MAPK3|RELA|TNF	173/43622 genes: 0,40%
Cellular responses to stress	REACT:R-HSA-2262752	4.24e-20	3.4e-17	18	CAT|CDKN1A|CXCL8|CYCS|GPX1|GSK3B|HDAC6|HSP90AB1|MAPK1|MAPK3|MDM2|NOX4|PRDX2|RELA|SIRT1|SOD1|SOD2|TP53	451/43622 genes: 1,03%
AGE-RAGE signaling pathway in diabetic complications	KEGG:hsa04933	1.53e-19	1.23e-16	12	AKT1|BAX|BCL2|CASP3|CCND1|CXCL8|F3|IL1B|MAPK1|MAPK3|RELA|TNF	99/43622 genes: 0,23%
Intrinsic Pathway for Apoptosis	REACT:R-HSA-109606	2.15e-19	1.72e-16	10	AKT1|APAF1|BAX|BCL2|CASP3|CASP7|CASP8|CASP9|CYCS|TP53	44/43622 genes: 0,10%
Non-alcoholic fatty liver disease (NAFLD)	KEGG:hsa04932	3.65e-19	2.93e-16	13	AKT1|BAX|CASP3|CASP7|CASP8|CXCL8|CYCS|FAS|FASLG|GSK3B|IL1B|RELA|TNF	149/43622 genes: 0,34%
TNF signaling pathway	KEGG:hsa04668	4.58e-19	3.67e-16	12	AKT1|CASP3|CASP7|CASP8|CREB1|FAS|IL1B|MAPK1|MAPK3|PTGS2|RELA|TNF	108/43622 genes: 0,25%
Innate Immune System	REACT:R-HSA-168249	5.54e-19	4.45e-16	24	ACTG1|AKT1|ANXA2|APAF1|BCL2|CASP8|CASP9|CAT|CDKN1A|CREB1|ELK1|GSK3B|HSP90AB1|IL1B|IL2|MAPK1|MAPK3|MDM2|NOS2|PLAUR|RELA|S100A9|TEK|TP53	1298/43622 genes: 2,98%
Toxoplasmosis	KEGG:hsa05145	8.06e-19	6.47e-16	12	AKT1|BCL2|CASP3|CASP8|CASP9|CYCS|IFNG|MAPK1|MAPK3|NOS2|RELA|TNF	113/43622 genes: 0,26%
Interleukin-4 and 13 signaling	REACT:R-HSA-6785807	8.99e-19	7.22e-16	12	AKT1|BCL2|CCND1|CDKN1A|CXCL8|FASLG|IL1B|MYC|NOS2|PTGS2|TNF|TP53	114/43622 genes: 0,26%
Small cell lung cancer	KEGG:hsa05222	2.21e-18	1.77e-15	11	AKT1|APAF1|BCL2|CASP9|CCND1|CYCS|MYC|NOS2|PTGS2|RELA|TP53	84/43622 genes: 0,19%
Legionellosis	KEGG:hsa05134	2.49e-18	2e-15	10	APAF1|CASP3|CASP7|CASP8|CASP9|CXCL8|CYCS|IL1B|RELA|TNF	55/43622 genes: 0,13%
Viral carcinogenesis	KEGG:hsa05203	1.93e-17	1.55e-14	13	BAX|CASP3|CASP8|CCND1|CDKN1A|CREB1|HDAC3|HDAC6|MAPK1|MAPK3|MDM2|RELA|TP53	201/43622 genes: 0,46%
Thyroid hormone signaling pathway	KEGG:hsa04919	8.96e-17	7.19e-14	11	ACTG1|AKT1|CASP9|CCND1|GSK3B|HDAC3|MAPK1|MAPK3|MDM2|MYC|TP53	116/43622 genes: 0,27%
Alzheimer's disease	KEGG:hsa05010	1.33e-16	1.07e-13	12	APAF1|CASP3|CASP7|CASP8|CASP9|CYCS|FAS|GSK3B|IL1B|MAPK1|MAPK3|TNF	171/43622 genes: 0,39%
Apoptosis	REACT:R-HSA-109581	1.43e-16	1.15e-13	12	AKT1|APAF1|BAX|BCL2|CASP3|CASP7|CASP8|CASP9|CYCS|FAS|FASLG|TP53	172/43622 genes: 0,39%
Endometrial cancer	KEGG:hsa05213	1.46e-16	1.17e-13	9	AKT1|CASP9|CCND1|ELK1|GSK3B|MAPK1|MAPK3|MYC|TP53	50/43622 genes: 0,11%
Programmed Cell Death	REACT:R-HSA-5357801	1.76e-16	1.42e-13	12	AKT1|APAF1|BAX|BCL2|CASP3|CASP7|CASP8|CASP9|CYCS|FAS|FASLG|TP53	175/43622 genes: 0,40%
FoxO signaling pathway	KEGG:hsa04068	3.86e-16	3.1e-13	11	AKT1|CAT|CCND1|CDKN1A|FASLG|GADD45A|MAPK1|MAPK3|MDM2|SIRT1|SOD2	132/43622 genes: 0,30%
MAPK signaling pathway	KEGG:hsa04010	4.32e-16	3.47e-13	13	AKT1|CASP3|ELK1|FAS|FASLG|GADD45A|IL1B|MAPK1|MAPK3|MYC|RELA|TNF|TP53	255/43622 genes: 0,58%
Apoptosis - multiple species	KEGG:hsa04215	5.56e-16	4.46e-13	8	APAF1|BAX|BCL2|CASP3|CASP7|CASP8|CASP9|CYCS	33/43622 genes: 0,08%
Signalling by NGF	REACT:R-HSA-166520	2.5e-15	2.01e-12	15	AKT1|CASP3|CASP9|CDKN1A|CREB1|ELK1|GSK3B|HDAC3|IL2|MAPK1|MAPK3|MDM2|RELA|TEK|TP53	477/43622 genes: 1,09%
Disease	REACT:R-HSA-1643685	3.39e-15	2.72e-12	18	AKT1|ALB|CASP9|CDC25C|CDKN1A|CREB1|FASLG|GSK3B|HDAC3|HDAC6|HSP90AB1|MAPK1|MAPK3|MDM2|MYC|PRDX2|RELA|SOD2	860/43622 genes: 1,97%
Bladder cancer	KEGG:hsa05219	3.78e-15	3.04e-12	8	CCND1|CDKN1A|CXCL8|MAPK1|MAPK3|MDM2|MYC|TP53	41/43622 genes: 0,09%
Chronic myeloid leukemia	KEGG:hsa05220	4.23e-15	3.4e-12	9	AKT1|CCND1|CDKN1A|MAPK1|MAPK3|MDM2|MYC|RELA|TP53	71/43622 genes: 0,16%
Leishmaniasis	KEGG:hsa05140	4.83e-15	3.88e-12	9	ELK1|IFNG|IL1B|MAPK1|MAPK3|NOS2|PTGS2|RELA|TNF	72/43622 genes: 0,17%
Pertussis	KEGG:hsa05133	8.04e-15	6.45e-12	9	CASP3|CASP7|CXCL8|IL1B|MAPK1|MAPK3|NOS2|RELA|TNF	76/43622 genes: 0,17%
Activation of caspases through apoptosome-mediated cleavage	REACT:R-HSA-111459	1.14e-14	9.17e-12	5	APAF1|CASP3|CASP7|CASP9|CYCS	5/43622 genes: 0,01%
Cytochrome c-mediated apoptotic response	REACT:R-HSA-111461	1.14e-14	9.17e-12	5	APAF1|CASP3|CASP7|CASP9|CYCS	5/43622 genes: 0,01%
HTLV-I infection	KEGG:hsa05166	1.72e-14	1.38e-11	12	AKT1|BAX|CCND1|CDKN1A|CREB1|ELK1|GSK3B|IL2|MYC|RELA|TNF|TP53	256/43622 genes: 0,59%
Measles	KEGG:hsa05162	2.6e-14	2.09e-11	10	AKT1|CCND1|FAS|FASLG|GSK3B|IFNG|IL1B|IL2|RELA|TP53	133/43622 genes: 0,30%
Huntington's disease	KEGG:hsa05016	2.67e-14	2.15e-11	11	APAF1|BAX|CASP3|CASP8|CASP9|CREB1|CYCS|GPX1|SOD1|SOD2|TP53	193/43622 genes: 0,44%
Fluid shear stress and atherosclerosis	KEGG:hsa05418	5.05e-14	4.06e-11	10	ACTG1|AKT1|BCL2|HSP90AB1|IFNG|IL1B|KDR|RELA|TNF|TP53	142/43622 genes: 0,33%
Endocrine resistance	KEGG:hsa01522	6.47e-14	5.19e-11	9	AKT1|BAX|BCL2|CCND1|CDKN1A|MAPK1|MAPK3|MDM2|TP53	95/43622 genes: 0,22%
MicroRNAs in cancer	KEGG:hsa05206	1.09e-13	8.77e-11	12	BCL2|CASP3|CCND1|CDC25C|CDKN1A|DDIT4|MAPK1|MDM2|MYC|PTGS2|SIRT1|TP53	299/43622 genes: 0,69%
HIF-1 signaling pathway	KEGG:hsa04066	1.14e-13	9.15e-11	9	AKT1|BCL2|CDKN1A|IFNG|MAPK1|MAPK3|NOS2|RELA|TEK	101/43622 genes: 0,23%
Apoptotic factor-mediated response	REACT:R-HSA-111471	2.39e-13	1.92e-10	5	APAF1|CASP3|CASP7|CASP9|CYCS	7/43622 genes: 0,02%
Detoxification of Reactive Oxygen Species	REACT:R-HSA-3299685	3.31e-13	2.66e-10	7	CAT|CYCS|GPX1|NOX4|PRDX2|SOD1|SOD2	38/43622 genes: 0,09%
Neurotrophin signaling pathway	KEGG:hsa04722	5.16e-13	4.14e-10	9	AKT1|BAX|BCL2|FASLG|GSK3B|MAPK1|MAPK3|RELA|TP53	119/43622 genes: 0,27%
Herpes simplex infection	KEGG:hsa05168	7.26e-13	5.83e-10	10	CASP3|CASP8|CYCS|FAS|FASLG|IFNG|IL1B|RELA|TNF|TP53	185/43622 genes: 0,42%
PIP3 activates AKT signaling	REACT:R-HSA-1257604	8.09e-13	6.49e-10	9	AKT1|CASP9|CDKN1A|CREB1|GSK3B|MAPK1|MAPK3|MDM2|TP53	125/43622 genes: 0,29%
GAB1 signalosome	REACT:R-HSA-180292	1e-12	8.06e-10	9	AKT1|CASP9|CDKN1A|CREB1|GSK3B|MAPK1|MAPK3|MDM2|TP53	128/43622 genes: 0,29%
PI3K/AKT activation	REACT:R-HSA-198203	1e-12	8.06e-10	9	AKT1|CASP9|CDKN1A|CREB1|GSK3B|MAPK1|MAPK3|MDM2|TP53	128/43622 genes: 0,29%
Hepatitis C	KEGG:hsa05160	1.24e-12	9.96e-10	9	AKT1|CDKN1A|CXCL8|GSK3B|MAPK1|MAPK3|RELA|TNF|TP53	131/43622 genes: 0,30%
Transcriptional Regulation by TP53	REACT:R-HSA-3700989	1.34e-12	1.08e-09	12	AKT1|APAF1|BAX|CDC25C|CDKN1A|CYCS|DDIT4|FAS|GADD45A|MDM2|PRDX2|TP53	370/43622 genes: 0,85%
Downstream signaling events of B Cell Receptor (BCR)	REACT:R-HSA-1168372	1.36e-12	1.09e-09	10	AKT1|CASP9|CDKN1A|CREB1|GSK3B|MAPK1|MAPK3|MDM2|RELA|TP53	197/43622 genes: 0,45%
Fc epsilon receptor (FCERI) signaling	REACT:R-HSA-2454202	1.72e-12	1.38e-09	12	AKT1|CASP9|CDKN1A|CREB1|GSK3B|IL2|MAPK1|MAPK3|MDM2|RELA|TEK|TP53	378/43622 genes: 0,87%
Role of LAT2/NTAL/LAB on calcium mobilization	REACT:R-HSA-2730905	1.86e-12	1.5e-09	9	AKT1|CASP9|CDKN1A|CREB1|GSK3B|MAPK1|MAPK3|MDM2|TP53	137/43622 genes: 0,31%
Salmonella infection	KEGG:hsa05132	1.98e-12	1.59e-09	8	ACTG1|CXCL8|IFNG|IL1B|MAPK1|MAPK3|NOS2|RELA	86/43622 genes: 0,20%
NGF signalling via TRKA from the plasma membrane	REACT:R-HSA-187037	2.27e-12	1.82e-09	12	AKT1|CASP9|CDKN1A|CREB1|ELK1|GSK3B|IL2|MAPK1|MAPK3|MDM2|TEK|TP53	387/43622 genes: 0,89%
Longevity regulating pathway	KEGG:hsa04211	2.62e-12	2.11e-09	8	AKT1|BAX|CAT|CREB1|RELA|SIRT1|SOD2|TP53	89/43622 genes: 0,20%
Constitutive Signaling by AKT1 E17K in Cancer	REACT:R-HSA-5674400	3.07e-12	2.47e-09	6	AKT1|CASP9|CDKN1A|CREB1|GSK3B|MDM2	25/43622 genes: 0,06%
Apoptotic machinery	KEGG:hsa_M00685	7.22e-12	5.79e-09	4	APAF1|CASP3|CASP7|CASP9	4/43622 genes: 0,01%
Signaling by the B Cell Receptor (BCR)	REACT:R-HSA-983705	7.52e-12	6.04e-09	10	AKT1|CASP9|CDKN1A|CREB1|GSK3B|MAPK1|MAPK3|MDM2|RELA|TP53	234/43622 genes: 0,54%
T cell receptor signaling pathway	KEGG:hsa04660	8.67e-12	6.96e-09	8	AKT1|GSK3B|IFNG|IL2|MAPK1|MAPK3|RELA|TNF	103/43622 genes: 0,24%
Toll-like receptor signaling pathway	KEGG:hsa04620	9.38e-12	7.53e-09	8	AKT1|CASP8|CXCL8|IL1B|MAPK1|MAPK3|RELA|TNF	104/43622 genes: 0,24%
Signaling by SCF-KIT	REACT:R-HSA-1433557	1.15e-11	9.27e-09	11	AKT1|CASP9|CDKN1A|CREB1|GSK3B|IL2|MAPK1|MAPK3|MDM2|TEK|TP53	337/43622 genes: 0,77%
NOD-like receptor signaling pathway	KEGG:hsa04621	1.31e-11	1.05e-08	9	BCL2|CASP8|CXCL8|HSP90AB1|IL1B|MAPK1|MAPK3|RELA|TNF	170/43622 genes: 0,39%
AKT phosphorylates targets in the cytosol	REACT:R-HSA-198323	1.45e-11	1.17e-08	5	AKT1|CASP9|CDKN1A|GSK3B|MDM2	13/43622 genes: 0,03%
Glioma	KEGG:hsa05214	1.57e-11	1.26e-08	7	AKT1|CCND1|CDKN1A|MAPK1|MAPK3|MDM2|TP53	64/43622 genes: 0,15%
Pancreatic cancer	KEGG:hsa05212	1.57e-11	1.26e-08	7	AKT1|CASP9|CCND1|MAPK1|MAPK3|RELA|TP53	64/43622 genes: 0,15%
Downstream signal transduction	REACT:R-HSA-186763	1.84e-11	1.48e-08	11	AKT1|CASP9|CDKN1A|CREB1|GSK3B|IL2|MAPK1|MAPK3|MDM2|TEK|TP53	352/43622 genes: 0,81%
DAP12 signaling	REACT:R-HSA-2424491	2.08e-11	1.67e-08	11	AKT1|CASP9|CDKN1A|CREB1|GSK3B|IL2|MAPK1|MAPK3|MDM2|TEK|TP53	356/43622 genes: 0,82%
Sphingolipid signaling pathway	KEGG:hsa04071	2.62e-11	2.1e-08	8	AKT1|BAX|BCL2|MAPK1|MAPK3|RELA|TNF|TP53	118/43622 genes: 0,27%
Signaling by EGFR	REACT:R-HSA-177929	2.63e-11	2.11e-08	11	AKT1|CASP9|CDKN1A|CREB1|GSK3B|IL2|MAPK1|MAPK3|MDM2|TEK|TP53	364/43622 genes: 0,83%
Melanoma	KEGG:hsa05218	2.72e-11	2.18e-08	7	AKT1|CCND1|CDKN1A|MAPK1|MAPK3|MDM2|TP53	69/43622 genes: 0,16%
Prion diseases	KEGG:hsa05020	2.78e-11	2.23e-08	6	BAX|ELK1|IL1B|MAPK1|MAPK3|SOD1	35/43622 genes: 0,08%
Prolactin signaling pathway	KEGG:hsa04917	3.01e-11	2.42e-08	7	AKT1|CCND1|GSK3B|MAPK1|MAPK3|PRL|RELA	70/43622 genes: 0,16%
Diseases of signal transduction	REACT:R-HSA-5663202	3.14e-11	2.52e-08	11	AKT1|CASP9|CDKN1A|CREB1|GSK3B|HDAC3|HDAC6|MAPK1|MAPK3|MDM2|MYC	370/43622 genes: 0,85%
DAP12 interactions	REACT:R-HSA-2172127	3.23e-11	2.59e-08	11	AKT1|CASP9|CDKN1A|CREB1|GSK3B|IL2|MAPK1|MAPK3|MDM2|TEK|TP53	371/43622 genes: 0,85%
Signaling by PDGF	REACT:R-HSA-186797	3.72e-11	2.99e-08	11	AKT1|CASP9|CDKN1A|CREB1|GSK3B|IL2|MAPK1|MAPK3|MDM2|TEK|TP53	376/43622 genes: 0,86%
Cell cycle	KEGG:hsa04110	3.9e-11	3.14e-08	8	CCND1|CDC25C|CDKN1A|GADD45A|GSK3B|MDM2|MYC|TP53	124/43622 genes: 0,28%
Osteoclast differentiation	KEGG:hsa04380	5.37e-11	4.31e-08	8	AKT1|CREB1|IFNG|IL1B|MAPK1|MAPK3|RELA|TNF	129/43622 genes: 0,30%
Focal adhesion	KEGG:hsa04510	5.38e-11	4.32e-08	9	ACTG1|AKT1|BCL2|CCND1|ELK1|GSK3B|KDR|MAPK1|MAPK3	199/43622 genes: 0,46%
Epstein-Barr virus infection	KEGG:hsa05169	5.63e-11	4.52e-08	9	AKT1|BCL2|CDKN1A|GSK3B|IFNG|MDM2|MYC|RELA|TP53	200/43622 genes: 0,46%
Natural killer cell mediated cytotoxicity	KEGG:hsa04650	6.46e-11	5.19e-08	8	CASP3|FAS|FASLG|IFNG|MAPK1|MAPK3|PTK2B|TNF	132/43622 genes: 0,30%
EGFR tyrosine kinase inhibitor resistance	KEGG:hsa01521	7.2e-11	5.78e-08	7	AKT1|BAX|BCL2|GSK3B|KDR|MAPK1|MAPK3	79/43622 genes: 0,18%
Graft-versus-host disease	KEGG:hsa05332	7.64e-11	6.14e-08	6	FAS|FASLG|IFNG|IL1B|IL2|TNF	41/43622 genes: 0,09%
Type I diabetes mellitus	KEGG:hsa04940	1.03e-10	8.3e-08	6	FAS|FASLG|IFNG|IL1B|IL2|TNF	43/43622 genes: 0,10%
Breast cancer	KEGG:hsa05224	1.3e-10	1.04e-07	8	AKT1|CCND1|CDKN1A|GSK3B|MAPK1|MAPK3|MYC|TP53	144/43622 genes: 0,33%
ErbB signaling pathway	KEGG:hsa04012	1.32e-10	1.06e-07	7	AKT1|CDKN1A|ELK1|GSK3B|MAPK1|MAPK3|MYC	86/43622 genes: 0,20%
Generic Transcription Pathway	REACT:R-HSA-212436	1.85e-10	1.49e-07	14	AKT1|APAF1|AR|BAX|CDC25C|CDKN1A|CYCS|DDIT4|FAS|GADD45A|MDM2|MYC|PRDX2|TP53	873/43622 genes: 2,00%
Jak-STAT signaling pathway	KEGG:hsa04630	2.46e-10	1.98e-07	8	AKT1|BCL2|CCND1|CDKN1A|IFNG|IL2|MYC|PRL	156/43622 genes: 0,36%
Developmental Biology	REACT:R-HSA-1266738	2.65e-10	2.13e-07	15	ACTG1|AKT1|CREB1|GSK3B|HDAC3|HSP90AB1|IL2|KCNQ2|KDR|KRT6A|MAPK1|MAPK3|RELA|TEK|TNF	1076/43622 genes: 2,47%
Amoebiasis	KEGG:hsa05146	2.69e-10	2.16e-07	7	CASP3|CXCL8|IFNG|IL1B|NOS2|RELA|TNF	95/43622 genes: 0,22%
Acute myeloid leukemia	KEGG:hsa05221	4.84e-10	3.88e-07	6	AKT1|CCND1|MAPK1|MAPK3|MYC|RELA	55/43622 genes: 0,13%
Th17 cell differentiation	KEGG:hsa04659	6.24e-10	5.01e-07	7	HSP90AB1|IFNG|IL1B|IL2|MAPK1|MAPK3|RELA	107/43622 genes: 0,25%
Non-small cell lung cancer	KEGG:hsa05223	6.73e-10	5.4e-07	6	AKT1|CASP9|CCND1|MAPK1|MAPK3|TP53	58/43622 genes: 0,13%
Viral myocarditis	KEGG:hsa05416	6.73e-10	5.4e-07	6	ACTG1|CASP3|CASP8|CASP9|CCND1|CYCS	58/43622 genes: 0,13%
Hemostasis	REACT:R-HSA-109582	7.18e-10	5.77e-07	12	AKT1|ALB|ANXA2|F3|IL2|MAPK1|MAPK3|NOS2|PLAUR|SOD1|TEK|TP53	639/43622 genes: 1,46%
VEGF signaling pathway	KEGG:hsa04370	7.48e-10	6e-07	6	AKT1|CASP9|KDR|MAPK1|MAPK3|PTGS2	59/43622 genes: 0,14%
Cytokine-cytokine receptor interaction	KEGG:hsa04060	8.02e-10	6.44e-07	9	CXCL8|FAS|FASLG|IFNG|IL1B|IL2|KDR|PRL|TNF	270/43622 genes: 0,62%
Cholinergic synapse	KEGG:hsa04725	8.62e-10	6.92e-07	7	ACHE|AKT1|BCL2|CREB1|KCNQ2|MAPK1|MAPK3	112/43622 genes: 0,26%
Gene Expression	REACT:R-HSA-74160	9.16e-10	7.35e-07	18	AKT1|APAF1|AR|BAX|CDC25C|CDKN1A|CYCS|DDIT4|FAS|GADD45A|GSK3B|HNRNPM|MAPK3|MDM2|MYC|PRDX2|SIRT1|TP53	1831/43622 genes: 4,20%
Caspase activation via extrinsic apoptotic signalling pathway	REACT:R-HSA-5357769	1.09e-09	8.74e-07	5	CASP3|CASP8|CASP9|FAS|FASLG	28/43622 genes: 0,06%
Thyroid cancer	KEGG:hsa05216	1.31e-09	1.05e-06	5	CCND1|MAPK1|MAPK3|MYC|TP53	29/43622 genes: 0,07%
Central carbon metabolism in cancer	KEGG:hsa05230	1.36e-09	1.09e-06	6	AKT1|MAPK1|MAPK3|MYC|SIRT3|TP53	65/43622 genes: 0,15%
Metabolism	REACT:R-HSA-1430728	1.96e-09	1.57e-06	19	ACHE|AKT1|ALB|ALDH2|CAT|CYCS|CYP1A1|GOT1|GPT|GPX1|HDAC3|HSP90AB1|ODC1|PTGES|PTGS2|SLC5A5|TPI1|TPO|TSHB	2172/43622 genes: 4,98%
Thyroid hormone synthesis	KEGG:hsa04918	3.01e-09	2.42e-06	6	ALB|CREB1|GPX1|SLC5A5|TPO|TSHB	74/43622 genes: 0,17%
African trypanosomiasis	KEGG:hsa05143	3.06e-09	2.46e-06	5	FAS|FASLG|IFNG|IL1B|TNF	34/43622 genes: 0,08%
Formation of apoptosome	REACT:R-HSA-111458	4.5e-09	3.61e-06	3	APAF1|CASP9|CYCS	3/43622 genes: 0,01%
Allograft rejection	KEGG:hsa05330	4.77e-09	3.83e-06	5	FAS|FASLG|IFNG|IL2|TNF	37/43622 genes: 0,08%
Ras signaling pathway	KEGG:hsa04014	4.78e-09	3.83e-06	8	AKT1|ELK1|FASLG|KDR|MAPK1|MAPK3|RELA|TEK	227/43622 genes: 0,52%
Oxytocin signaling pathway	KEGG:hsa04921	7.29e-09	5.86e-06	7	ACTG1|CCND1|CDKN1A|ELK1|MAPK1|MAPK3|PTGS2	152/43622 genes: 0,35%
Toll-Like Receptors Cascades	REACT:R-HSA-168898	7.63e-09	6.13e-06	7	CASP8|CREB1|ELK1|MAPK1|MAPK3|RELA|S100A9	153/43622 genes: 0,35%
Cellular response to heat stress	REACT:R-HSA-3371556	9.27e-09	7.44e-06	6	GSK3B|HDAC6|HSP90AB1|MAPK1|MAPK3|SIRT1	89/43622 genes: 0,20%
PI3K/AKT Signaling in Cancer	REACT:R-HSA-2219528	9.92e-09	7.96e-06	6	AKT1|CASP9|CDKN1A|CREB1|GSK3B|MDM2	90/43622 genes: 0,21%
NF-kappa B signaling pathway	KEGG:hsa04064	1.29e-08	1.04e-05	6	BCL2|CXCL8|IL1B|PTGS2|RELA|TNF	94/43622 genes: 0,22%
MyD88-independent TLR3/TLR4 cascade	REACT:R-HSA-166166	1.76e-08	1.42e-05	6	CASP8|CREB1|ELK1|MAPK1|MAPK3|RELA	99/43622 genes: 0,23%
Toll Like Receptor 3 (TLR3) Cascade	REACT:R-HSA-168164	1.76e-08	1.42e-05	6	CASP8|CREB1|ELK1|MAPK1|MAPK3|RELA	99/43622 genes: 0,23%
TRIF-mediated TLR3/TLR4 signaling	REACT:R-HSA-937061	1.76e-08	1.42e-05	6	CASP8|CREB1|ELK1|MAPK1|MAPK3|RELA	99/43622 genes: 0,23%
TP53 Regulates Transcription of Cell Cycle Genes	REACT:R-HSA-6791312	2.06e-08	1.65e-05	5	BAX|CDC25C|CDKN1A|GADD45A|TP53	49/43622 genes: 0,11%
Chemokine signaling pathway	KEGG:hsa04062	2.53e-08	2.03e-05	7	AKT1|CXCL8|GSK3B|MAPK1|MAPK3|PTK2B|RELA	182/43622 genes: 0,42%
TP53 Regulates Transcription of Genes Involved in G2 Cell Cycle Arrest	REACT:R-HSA-6804114	2.74e-08	2.2e-05	4	BAX|CDC25C|GADD45A|TP53	19/43622 genes: 0,04%
Autoimmune thyroid disease	KEGG:hsa05320	2.79e-08	2.24e-05	5	FAS|FASLG|IL2|TPO|TSHB	52/43622 genes: 0,12%
Axon guidance	REACT:R-HSA-422475	2.86e-08	2.29e-05	10	ACTG1|CREB1|GSK3B|HSP90AB1|IL2|KCNQ2|KDR|MAPK1|MAPK3|TEK	550/43622 genes: 1,26%
Signaling by NOTCH	REACT:R-HSA-157118	3.7e-08	2.97e-05	6	CCND1|CREB1|HDAC3|HDAC6|MYC|TP53	112/43622 genes: 0,26%
Cellular Senescence	REACT:R-HSA-2559583	4.21e-08	3.38e-05	7	CDKN1A|CXCL8|MAPK1|MAPK3|MDM2|RELA|TP53	196/43622 genes: 0,45%
Activated TLR4 signalling	REACT:R-HSA-166054	4.34e-08	3.48e-05	6	CASP8|CREB1|ELK1|MAPK1|MAPK3|RELA	115/43622 genes: 0,26%
FasL/ CD95L signaling	REACT:R-HSA-75157	4.49e-08	3.6e-05	3	CASP8|FAS|FASLG	5/43622 genes: 0,01%
SMAC binds to IAPs	REACT:R-HSA-111463	4.49e-08	3.6e-05	3	CASP3|CASP7|CASP9	5/43622 genes: 0,01%
SMAC-mediated apoptotic response	REACT:R-HSA-111469	4.49e-08	3.6e-05	3	CASP3|CASP7|CASP9	5/43622 genes: 0,01%
SMAC-mediated dissociation of IAP:caspase complexes	REACT:R-HSA-111464	4.49e-08	3.6e-05	3	CASP3|CASP7|CASP9	5/43622 genes: 0,01%
Deregulated CDK5 triggers multiple neurodegenerative pathways in Alzheimer's disease models	REACT:R-HSA-8862803	6.24e-08	5.01e-05	4	CDC25C|FASLG|PRDX2|SOD2	23/43622 genes: 0,05%
Neurodegenerative Diseases	REACT:R-HSA-8863678	6.24e-08	5.01e-05	4	CDC25C|FASLG|PRDX2|SOD2	23/43622 genes: 0,05%
Longevity regulating pathway - multiple species	KEGG:hsa04213	6.86e-08	5.51e-05	5	AKT1|CAT|SIRT1|SOD1|SOD2	62/43622 genes: 0,14%
Toll Like Receptor 4 (TLR4) Cascade	REACT:R-HSA-166016	7.48e-08	6.01e-05	6	CASP8|CREB1|ELK1|MAPK1|MAPK3|RELA	126/43622 genes: 0,29%
Inflammatory bowel disease (IBD)	KEGG:hsa05321	8.72e-08	7e-05	5	IFNG|IL1B|IL2|RELA|TNF	65/43622 genes: 0,15%
Shigellosis	KEGG:hsa05131	8.72e-08	7e-05	5	ACTG1|CXCL8|MAPK1|MAPK3|RELA	65/43622 genes: 0,15%
Cell Cycle	REACT:R-HSA-1640170	8.84e-08	7.1e-05	10	AKT1|CCND1|CDC25C|CDKN1A|HSP90AB1|MAPK1|MAPK3|MDM2|MYC|TP53	621/43622 genes: 1,42%
Nuclear Events (kinase and transcription factor activation)	REACT:R-HSA-198725	8.89e-08	7.14e-05	4	CREB1|ELK1|MAPK1|MAPK3	25/43622 genes: 0,06%
CLEC7A/inflammasome pathway	REACT:R-HSA-5660668	8.96e-08	7.19e-05	3	CASP8|IL1B|RELA	6/43622 genes: 0,01%
B cell receptor signaling pathway	KEGG:hsa04662	1.27e-07	0.000102	5	AKT1|GSK3B|MAPK1|MAPK3|RELA	70/43622 genes: 0,16%
Cell Cycle, Mitotic	REACT:R-HSA-69278	2.03e-07	0.000163	9	AKT1|CCND1|CDC25C|CDKN1A|HSP90AB1|MAPK1|MAPK3|MYC|TP53	514/43622 genes: 1,18%
mTOR signaling pathway	KEGG:hsa04150	2.19e-07	0.000176	6	AKT1|DDIT4|GSK3B|MAPK1|MAPK3|TNF	151/43622 genes: 0,35%
MAPK targets/ Nuclear events mediated by MAP kinases	REACT:R-HSA-450282	2.19e-07	0.000176	4	CREB1|ELK1|MAPK1|MAPK3	31/43622 genes: 0,07%
Oncogene Induced Senescence	REACT:R-HSA-2559585	2.5e-07	0.000201	4	MAPK1|MAPK3|MDM2|TP53	32/43622 genes: 0,07%
MyD88 cascade initiated on plasma membrane	REACT:R-HSA-975871	3.18e-07	0.000255	5	CREB1|ELK1|MAPK1|MAPK3|RELA	84/43622 genes: 0,19%
TGF-beta signaling pathway	KEGG:hsa04350	3.18e-07	0.000255	5	IFNG|MAPK1|MAPK3|MYC|TNF	84/43622 genes: 0,19%
Toll Like Receptor 10 (TLR10) Cascade	REACT:R-HSA-168142	3.18e-07	0.000255	5	CREB1|ELK1|MAPK1|MAPK3|RELA	84/43622 genes: 0,19%
Toll Like Receptor 5 (TLR5) Cascade	REACT:R-HSA-168176	3.18e-07	0.000255	5	CREB1|ELK1|MAPK1|MAPK3|RELA	84/43622 genes: 0,19%
TP53 Regulates Metabolic Genes	REACT:R-HSA-5628897	3.37e-07	0.000271	5	AKT1|CYCS|DDIT4|PRDX2|TP53	85/43622 genes: 0,19%
Rheumatoid arthritis	KEGG:hsa05323	4.25e-07	0.000341	5	CXCL8|IFNG|IL1B|TEK|TNF	89/43622 genes: 0,20%
TRAF6 mediated induction of NFkB and MAP kinases upon TLR7/8 or 9 activation	REACT:R-HSA-975138	4.75e-07	0.000381	5	CREB1|ELK1|MAPK1|MAPK3|RELA	91/43622 genes: 0,21%
Th1 and Th2 cell differentiation	KEGG:hsa04658	5.01e-07	0.000403	5	IFNG|IL2|MAPK1|MAPK3|RELA	92/43622 genes: 0,21%
MyD88 dependent cascade initiated on endosome	REACT:R-HSA-975155	5.29e-07	0.000425	5	CREB1|ELK1|MAPK1|MAPK3|RELA	93/43622 genes: 0,21%
Toll Like Receptor 7/8 (TLR7/8) Cascade	REACT:R-HSA-168181	5.29e-07	0.000425	5	CREB1|ELK1|MAPK1|MAPK3|RELA	93/43622 genes: 0,21%
Thyroxine biosynthesis	REACT:R-HSA-209968	5.35e-07	0.00043	3	SLC5A5|TPO|TSHB	10/43622 genes: 0,02%
MyD88:Mal cascade initiated on plasma membrane	REACT:R-HSA-166058	5.88e-07	0.000472	5	CREB1|ELK1|MAPK1|MAPK3|RELA	95/43622 genes: 0,22%
Toll Like Receptor 2 (TLR2) Cascade	REACT:R-HSA-181438	5.88e-07	0.000472	5	CREB1|ELK1|MAPK1|MAPK3|RELA	95/43622 genes: 0,22%
Toll Like Receptor TLR1:TLR2 Cascade	REACT:R-HSA-168179	5.88e-07	0.000472	5	CREB1|ELK1|MAPK1|MAPK3|RELA	95/43622 genes: 0,22%
Toll Like Receptor TLR6:TLR2 Cascade	REACT:R-HSA-168188	5.88e-07	0.000472	5	CREB1|ELK1|MAPK1|MAPK3|RELA	95/43622 genes: 0,22%
Transcriptional misregulation in cancer	KEGG:hsa05202	5.95e-07	0.000478	6	CDKN1A|CXCL8|MDM2|MYC|RELA|TP53	179/43622 genes: 0,41%
Progesterone-mediated oocyte maturation	KEGG:hsa04914	6.2e-07	0.000498	5	AKT1|CDC25C|HSP90AB1|MAPK1|MAPK3	96/43622 genes: 0,22%
Toll Like Receptor 9 (TLR9) Cascade	REACT:R-HSA-168138	6.53e-07	0.000524	5	CREB1|ELK1|MAPK1|MAPK3|RELA	97/43622 genes: 0,22%
Estrogen signaling pathway	KEGG:hsa04915	6.87e-07	0.000552	5	AKT1|CREB1|HSP90AB1|MAPK1|MAPK3	98/43622 genes: 0,22%
CASP8 activity is inhibited	REACT:R-HSA-5218900	7.35e-07	0.00059	3	CASP8|FAS|FASLG	11/43622 genes: 0,03%
Dimerization of procaspase-8	REACT:R-HSA-69416	7.35e-07	0.00059	3	CASP8|FAS|FASLG	11/43622 genes: 0,03%
Regulation by c-FLIP	REACT:R-HSA-3371378	7.35e-07	0.00059	3	CASP8|FAS|FASLG	11/43622 genes: 0,03%
TP53 Regulates Transcription of Cell Death Genes	REACT:R-HSA-5633008	1.02e-06	0.00082	4	APAF1|BAX|FAS|TP53	45/43622 genes: 0,10%
Transcriptional activation of mitochondrial biogenesis	REACT:R-HSA-2151201	1.02e-06	0.00082	4	CREB1|CYCS|HDAC3|SIRT3	45/43622 genes: 0,10%
Insulin resistance	KEGG:hsa04931	1.06e-06	0.000853	5	AKT1|CREB1|GSK3B|RELA|TNF	107/43622 genes: 0,25%
Adaptive Immune System	REACT:R-HSA-1280218	1.09e-06	0.000875	10	AKT1|CASP9|CDKN1A|CREB1|GSK3B|MAPK1|MAPK3|MDM2|RELA|TP53	818/43622 genes: 1,88%
Senescence-Associated Secretory Phenotype (SASP)	REACT:R-HSA-2559582	1.22e-06	0.000979	5	CDKN1A|CXCL8|MAPK1|MAPK3|RELA	110/43622 genes: 0,25%
Metabolic pathways	KEGG:hsa01100	1.26e-06	0.00101	12	ALDH2|ALDH5A1|CYCS|CYP1A1|GOT1|GPT|NOS2|ODC1|PTGES|PTGS2|TPI1|TPO	1270/43622 genes: 2,91%
Caspase-mediated cleavage of cytoskeletal proteins	REACT:R-HSA-264870	1.27e-06	0.00102	3	CASP3|CASP7|CASP8	13/43622 genes: 0,03%
Nucleotide-binding domain, leucine rich repeat containing receptor (NLR) signaling pathways	REACT:R-HSA-168643	1.33e-06	0.00107	4	BCL2|CASP8|CASP9|HSP90AB1	48/43622 genes: 0,11%
VEGFA-VEGFR2 Pathway	REACT:R-HSA-4420097	1.41e-06	0.00113	7	AKT1|IL2|KDR|MAPK1|MAPK3|PTK2B|TEK	330/43622 genes: 0,76%
Arginine and proline metabolism	KEGG:hsa00330	1.44e-06	0.00116	4	ALDH2|GOT1|NOS2|ODC1	49/43622 genes: 0,11%
Interleukin-10 signaling	REACT:R-HSA-6783783	1.44e-06	0.00116	4	CXCL8|IL1B|PTGS2|TNF	49/43622 genes: 0,11%
Malaria	KEGG:hsa05144	1.44e-06	0.00116	4	CXCL8|IFNG|IL1B|TNF	49/43622 genes: 0,11%
Rap1 signaling pathway	KEGG:hsa04015	1.51e-06	0.00121	6	ACTG1|AKT1|KDR|MAPK1|MAPK3|TEK	210/43622 genes: 0,48%
Death Receptor Signalling	REACT:R-HSA-73887	1.57e-06	0.00126	4	CASP8|FAS|FASLG|TNF	50/43622 genes: 0,11%
Regulation of necroptotic cell death	REACT:R-HSA-5675482	1.62e-06	0.0013	3	CASP8|FAS|FASLG	14/43622 genes: 0,03%
Signaling by VEGF	REACT:R-HSA-194138	1.66e-06	0.00133	7	AKT1|IL2|KDR|MAPK1|MAPK3|PTK2B|TEK	338/43622 genes: 0,77%
Transmission across Chemical Synapses	REACT:R-HSA-112315	1.82e-06	0.00146	6	ACHE|ALDH2|ALDH5A1|CREB1|MAPK1|MDM2	217/43622 genes: 0,50%
Neuronal System	REACT:R-HSA-112316	2.05e-06	0.00164	7	ACHE|ALDH2|ALDH5A1|CREB1|KCNQ2|MAPK1|MDM2	349/43622 genes: 0,80%
Mitochondrial biogenesis	REACT:R-HSA-1592230	2.14e-06	0.00172	4	CREB1|CYCS|HDAC3|SIRT3	54/43622 genes: 0,12%
Regulated Necrosis	REACT:R-HSA-5218859	2.48e-06	0.00199	3	CASP8|FAS|FASLG	16/43622 genes: 0,04%
RIPK1-mediated regulated necrosis	REACT:R-HSA-5213460	2.48e-06	0.00199	3	CASP8|FAS|FASLG	16/43622 genes: 0,04%
Autophagy - animal	KEGG:hsa04140	2.57e-06	0.00207	5	AKT1|BCL2|DDIT4|MAPK1|MAPK3	128/43622 genes: 0,29%
Ligand-dependent caspase activation	REACT:R-HSA-140534	3.01e-06	0.00241	3	CASP8|FAS|FASLG	17/43622 genes: 0,04%
Arachidonic acid metabolism	REACT:R-HSA-2142753	3.28e-06	0.00263	4	CYP1A1|GPX1|PTGES|PTGS2	60/43622 genes: 0,14%
Amine-derived hormones	REACT:R-HSA-209776	3.6e-06	0.00289	3	SLC5A5|TPO|TSHB	18/43622 genes: 0,04%
Apelin signaling pathway	KEGG:hsa04371	3.72e-06	0.00299	5	AKT1|CCND1|MAPK1|MAPK3|NOS2	138/43622 genes: 0,32%
Insulin signaling pathway	KEGG:hsa04910	3.72e-06	0.00299	5	AKT1|ELK1|GSK3B|MAPK1|MAPK3	138/43622 genes: 0,32%
Signaling pathways regulating pluripotency of stem cells	KEGG:hsa04550	3.86e-06	0.0031	5	AKT1|GSK3B|MAPK1|MAPK3|MYC	139/43622 genes: 0,32%
MAP kinase activation in TLR cascade	REACT:R-HSA-450294	4.25e-06	0.00341	4	CREB1|ELK1|MAPK1|MAPK3	64/43622 genes: 0,15%
Adrenergic signaling in cardiomyocytes	KEGG:hsa04261	4.58e-06	0.00368	5	AKT1|BCL2|CREB1|MAPK1|MAPK3	144/43622 genes: 0,33%
Phospholipase D signaling pathway	KEGG:hsa04072	4.74e-06	0.00381	5	AKT1|CXCL8|MAPK1|MAPK3|PTK2B	145/43622 genes: 0,33%
Fc epsilon RI signaling pathway	KEGG:hsa04664	5.11e-06	0.0041	4	AKT1|MAPK1|MAPK3|TNF	67/43622 genes: 0,15%
Arginine biosynthesis	KEGG:hsa00220	5.85e-06	0.0047	3	GOT1|GPT|NOS2	21/43622 genes: 0,05%
Regulation of actin dynamics for phagocytic cup formation	REACT:R-HSA-2029482	6.09e-06	0.00489	4	ACTG1|HSP90AB1|MAPK1|MAPK3	70/43622 genes: 0,16%
Regulation of HSF1-mediated heat shock response	REACT:R-HSA-3371453	6.09e-06	0.00489	4	GSK3B|MAPK1|MAPK3|SIRT1	70/43622 genes: 0,16%
RIG-I-like receptor signaling pathway	KEGG:hsa04622	6.09e-06	0.00489	4	CASP8|CXCL8|RELA|TNF	70/43622 genes: 0,16%
ERK/MAPK targets	REACT:R-HSA-198753	6.77e-06	0.00543	3	ELK1|MAPK1|MAPK3	22/43622 genes: 0,05%
Cyclin E associated events during G1/S transition	REACT:R-HSA-69202	6.81e-06	0.00547	4	AKT1|CCND1|CDKN1A|MYC	72/43622 genes: 0,17%
Platelet activation, signaling and aggregation	REACT:R-HSA-76002	8.19e-06	0.00658	6	AKT1|ALB|IL2|MAPK1|MAPK3|SOD1	282/43622 genes: 0,65%
Antigen processing and presentation	KEGG:hsa04612	8.9e-06	0.00715	4	CREB1|HSP90AB1|IFNG|TNF	77/43622 genes: 0,18%
Gastrin-CREB signalling pathway via PKC and MAPK	REACT:R-HSA-881907	9.72e-06	0.0078	7	CREB1|HCRTR1|IL2|KISS1|MAPK1|MAPK3|TEK	443/43622 genes: 1,02%
Growth hormone receptor signaling	REACT:R-HSA-982772	1.01e-05	0.00809	3	MAPK1|MAPK3|PRL	25/43622 genes: 0,06%
Peroxisome	KEGG:hsa04146	1.2e-05	0.00963	4	CAT|NOS2|SOD1|SOD2	83/43622 genes: 0,19%

## Sheet: CTD-MB
Pathway	Pathway ID	P-value	Corrected P-value	Annotated Genes Quantity	Annotated Genes	Genome Frequency
Immune System	REACT:R-HSA-168256	2.71e-63	4.1e-60	113	ACTG1|AGO3|AKT1|ALDOC|ANXA2|APAF1|ATG12|ATP6V0B|ATP6V0C|ATP6V1C1|BAD|BCL2|BCL2L1|CALM1|CALM2|CAMP|CASP1|CASP3|CASP8|CASP9|CAT|CCL19|CCL2|CCND1|CD34|CDKN1A|CEBPD|CEP290|CLU|CREB1|CTSL|CXCL10|CXCL8|DNM2|EEF1A1|EIF4G2|ELK1|FASLG|FGFR3|FOS|GM2A|GRB2|GSK3B|GSTP1|HMOX1|HSP90AA1|HSP90AB1|HSPA1B|HSPA5|HSPA8|IFNG|IL1B|IL2|IRS2|ITGAM|ITPR1|JUN|KIT|LIFR|LRRC41|MAP2K1|MAP2K6|MAPK1|MAPK3|MCL1|MDM2|MEF2C|MTOR|…	2118/43622 genes: 4,86%
Signal Transduction	REACT:R-HSA-162582	5.54e-60	8.41e-57	119	ACTG1|ADORA1|AGO3|AKT1|AR|ATP6V0B|ATP6V0C|ATP6V1C1|BAD|BCL2L11|BMP2|CALM1|CALM2|CASP3|CASP8|CASP9|CCL19|CCL21|CCND1|CDC25C|CDK2|CDKN1A|CHRM2|CREB1|CXCL10|CXCL8|DGKI|DLL1|DNM2|DRD2|DRD4|DRD5|E2F1|ELK1|FAS|FASLG|FGFR3|GFAP|GNG5|GNGT2|GPR27|GRB2|GSK3B|H2AC20|H2AC6|H2BC9|HCRTR1|HDAC3|HDAC6|HEY2|HEYL|HNRNPM|HSP90AA1|IGF1|IL2|INHBA|IRS2|ITPR1|JUN|KDR|KISS1|KIT|LAMC2|LIMK2|LRRK2|MAP2K1|MAPK1|MAPK3|MDM2|…	2587/43622 genes: 5,93%
Pathways in cancer	KEGG:hsa05200	1.13e-57	1.71e-54	59	AKT1|AR|ARNT2|BAD|BAX|BCL2|BCL2L1|BID|BMP2|BMP4|CASP3|CASP8|CASP9|CCND1|CDK2|CDKN1A|CDKN2A|CXCL8|CYCS|E2F1|FAS|FASLG|FGFR3|FOS|GNG5|GNGT2|GRB2|GSK3B|GSTP1|HSP90AA1|HSP90AB1|IGF1|JUN|KIT|LAMC2|MAP2K1|MAPK1|MAPK3|MDM2|MTOR|MYC|NFKB1|NFKBIA|NOS2|PDGFRA|PRKACA|PTGS2|RAF1|RB1|RBX1|RELA|ROCK1|STAT3|TGFB1|TP53|TRAF6|VEGFA|WNT1|WNT5A	395/43622 genes: 0,91%
Innate Immune System	REACT:R-HSA-168249	1.14e-54	1.72e-51	86	ACTG1|AGO3|AKT1|ALDOC|ANXA2|APAF1|ATG12|ATP6V0B|ATP6V0C|ATP6V1C1|BAD|BCL2|BCL2L1|CALM1|CALM2|CAMP|CASP1|CASP8|CASP9|CAT|CDKN1A|CEP290|CLU|CREB1|CTSL|DNM2|EEF1A1|ELK1|FGFR3|FOS|GM2A|GRB2|GSK3B|GSTP1|HSP90AA1|HSP90AB1|HSPA1B|HSPA8|IL1B|IL2|IRS2|ITGAM|ITPR1|JUN|KIT|MAP2K1|MAP2K6|MAPK1|MAPK3|MDM2|MEF2C|MTOR|MUC6|NCF1|NFKB1|NFKBIA|NOS2|NR4A1|NRG1|NRTN|PDE1B|PDGFRA|PEBP1|PLAUR|POLR1C|POLR2K|PRKACA|PSAP…	1298/43622 genes: 2,98%
Cellular responses to stress	REACT:R-HSA-2262752	1.9e-51	2.88e-48	57	AGO3|ATG12|BECN1|CAT|CDK2|CDKN1A|CDKN2A|CXCL8|CYCS|DNAJB6|E2F1|EEF1A1|FKBP4|FOS|GPX1|GSK3B|GSR|GSTP1|H2AC20|H2AC6|H2BC9|HDAC6|HMGA2|HSF1|HSP90AA1|HSP90AB1|HSPA1B|HSPA5|HSPA8|JUN|MAP2K6|MAPK1|MAPK3|MDM2|MDM4|MTOR|NCF1|NFKB1|NOX4|PRDX1|PRDX2|PRDX3|PSMB1|PSMC4|RB1|RBX1|RELA|RPS6KA2|SIRT1|SOD1|SOD2|STAT3|TP53|TXNRD1|UBB|UBC|VEGFA	451/43622 genes: 1,03%
Apoptosis	KEGG:hsa04210	3.67e-48	5.56e-45	38	ACTG1|AKT1|APAF1|BAD|BAK1|BAX|BBC3|BCL2|BCL2A1|BCL2L1|BCL2L11|BID|CASP3|CASP7|CASP8|CASP9|CTSL|CYCS|FAS|FASLG|FOS|GADD45A|ITPR1|JUN|MAP2K1|MAPK1|MAPK3|MCL1|NFKB1|NFKBIA|PMAIP1|RAF1|RELA|RIPK1|TNF|TP53|TUBA1A|TUBA1B	138/43622 genes: 0,32%
Signaling by Interleukins	REACT:R-HSA-449147	3.02e-46	4.57e-43	56	AKT1|BCL2|BCL2L1|CALM1|CALM2|CASP1|CASP3|CCL19|CCL2|CCND1|CDKN1A|CEBPD|CXCL10|CXCL8|FASLG|FGFR3|FOS|GRB2|HMOX1|HSP90AA1|HSPA8|IL1B|IL2|IRS2|ITGAM|KIT|LIFR|MAP2K1|MAP2K6|MAPK1|MAPK3|MCL1|MYC|NFKB1|NOS2|NRG1|NRTN|PDGFRA|PEBP1|PRKACA|PSMB1|PSMC4|PTGS2|PTK2B|RAF1|RBX1|RELA|STAT3|TEK|TGFB1|TNF|TP53|TRAF6|UBB|UBC|VEGFA	528/43622 genes: 1,21%
Hepatitis B	KEGG:hsa05161	1.19e-45	1.8e-42	37	AKT1|APAF1|BAD|BAX|BCL2|CASP3|CASP8|CASP9|CCND1|CDK2|CDKN1A|CREB1|CXCL8|CYCS|E2F1|ELK1|FAS|FASLG|FOS|GRB2|JUN|MAP2K1|MAPK1|MAPK3|MYC|NFKB1|NFKBIA|PCNA|PTK2B|RAF1|RB1|RELA|STAT3|STAT4|TGFB1|TNF|TP53	144/43622 genes: 0,33%
Disease	REACT:R-HSA-1643685	3.18e-42	4.82e-39	63	AKT1|ALB|AMN|BAD|BCL2L11|CALM1|CALM2|CASP9|CDC25C|CDK5R1|CDKN1A|CREB1|DLL1|FASLG|FGFR3|GRB2|GSK3B|HDAC3|HDAC6|HEY2|HEYL|HSP90AA1|HSP90AB1|IRS2|JUN|KIT|MACF1|MAP2K1|MAP2K6|MAPK1|MAPK3|MDM2|MTOR|MUC6|MYC|NFKB1|NFKBIA|NR4A1|NRG1|PDGFRA|PEBP1|POLR2K|PRDX1|PRDX2|PSMB1|PSMC4|RAF1|RBX1|RELA|RPL12|RPL19|RPL41|RPL8|RPL9|RPS12|RPS15|RPS27|SOD2|STAT3|TGFB1|TXNRD1|UBB|UBC	860/43622 genes: 1,97%
Cytokine Signaling in Immune system	REACT:R-HSA-1280215	4.74e-42	7.19e-39	60	AKT1|BCL2|BCL2L1|CALM1|CALM2|CASP1|CASP3|CCL19|CCL2|CCND1|CDKN1A|CEBPD|CXCL10|CXCL8|EIF4G2|FASLG|FGFR3|FOS|GRB2|HMOX1|HSP90AA1|HSPA8|IFNG|IL1B|IL2|IRS2|ITGAM|KIT|LIFR|MAP2K1|MAP2K6|MAPK1|MAPK3|MCL1|MYC|NFKB1|NOS2|NRG1|NRTN|PDGFRA|PEBP1|PRKACA|PRL|PSMB1|PSMC4|PTGS2|PTK2B|RAF1|RBX1|RELA|STAT3|SUMO1|TEK|TGFB1|TNF|TP53|TRAF6|UBB|UBC|VEGFA	760/43622 genes: 1,74%
PI3K-Akt signaling pathway	KEGG:hsa04151	3.9e-40	5.91e-37	44	AKT1|BAD|BCL2|BCL2L1|BCL2L11|CASP9|CCND1|CCND2|CDK2|CDKN1A|CHRM2|CREB1|DDIT4|FASLG|FGFR3|GNG5|GNGT2|GRB2|GSK3B|HSP90AA1|HSP90AB1|IGF1|IL2|ITGB8|KDR|KIT|LAMC2|MAP2K1|MAPK1|MAPK3|MCL1|MDM2|MTOR|MYC|NFKB1|NR4A1|PDGFRA|PRL|RAF1|RELA|TEK|TNR|TP53|VEGFA	341/43622 genes: 0,78%
Signalling by NGF	REACT:R-HSA-166520	8.69e-40	1.32e-36	49	AGO3|AKT1|BAD|BCL2L11|CALM1|CALM2|CASP3|CASP9|CDKN1A|CREB1|DNM2|ELK1|FGFR3|GRB2|GSK3B|HDAC3|IL2|IRS2|ITPR1|KIT|MAP2K1|MAPK1|MAPK3|MDM2|MEF2C|MTOR|NFKB1|NFKBIA|NR4A1|NRG1|NRTN|NTRK2|PDE1B|PDGFRA|PEBP1|PRKACA|PSMB1|PSMC4|RAF1|RBX1|RELA|RPS6KA2|RTN4|STAT3|TEK|TP53|TRAF6|UBB|UBC	477/43622 genes: 1,09%
Fluid shear stress and atherosclerosis	KEGG:hsa05418	3.36e-39	5.09e-36	33	ACTG1|AKT1|BCL2|BMP4|CALM1|CALM2|CCL2|CTSL|FOS|GSTA3|GSTA4|GSTP1|HMOX1|HSP90AA1|HSP90AB1|IFNG|IL1B|JUN|KDR|KLF2|MAP2K6|MEF2C|NCF1|NFE2L2|NFKB1|NOX1|NQO1|PRKCZ|RELA|SUMO1|TNF|TP53|VEGFA	142/43622 genes: 0,33%
Metabolism	REACT:R-HSA-1430728	7.48e-39	1.13e-35	88	ACADS|ACHE|ACO2|AKT1|ALAS2|ALB|ALDH2|ALDOC|AMN|ARF3|ARNT2|CACNA1E|CALM1|CALM2|CAT|CDIPT|COX5A|COX6A1|COX6B1|COX7A2L|CROT|CYC1|CYCS|CYP1A1|CYP1A2|CYP2E1|DBI|DIO1|DLST|DNM2|ENO1|ENO2|GCLC|GM2A|GNG5|GNGT2|GOT1|GPT|GPX1|GPX4|GSR|GSTA3|GSTA4|GSTP1|GUK1|HDAC3|HK1|HMOX1|HSD11B2|HSP90AA1|HSP90AB1|IDH3A|ITPR1|MBOAT2|MTHFR|NQO1|OAZ2|ODC1|PDHA1|PGS1|PLCE1|PRKACA|PSAP|PSMB1|PSMC4|PTGES|PTGS2|RPL12|RPL19|RPL4…	2172/43622 genes: 4,98%
Prostate cancer	KEGG:hsa05215	6.49e-38	9.83e-35	28	AKT1|AR|BAD|BCL2|CASP9|CCND1|CDK2|CDKN1A|CREB1|E2F1|GRB2|GSK3B|GSTP1|HSP90AA1|HSP90AB1|IGF1|MAP2K1|MAPK1|MAPK3|MDM2|MTOR|NFKB1|NFKBIA|PDGFRA|RAF1|RB1|RELA|TP53	87/43622 genes: 0,20%
Platinum drug resistance	KEGG:hsa01524	9.13e-35	1.38e-31	25	AKT1|APAF1|BAD|BAK1|BAX|BBC3|BCL2|BCL2L1|BID|CASP3|CASP8|CASP9|CDKN1A|CDKN2A|CYCS|FAS|FASLG|GSTA3|GSTA4|GSTP1|MAPK1|MAPK3|MDM2|PMAIP1|TP53	73/43622 genes: 0,17%
NGF signalling via TRKA from the plasma membrane	REACT:R-HSA-187037	6.61e-34	1e-30	41	AGO3|AKT1|BAD|CALM1|CALM2|CASP9|CDKN1A|CREB1|DNM2|ELK1|FGFR3|GRB2|GSK3B|IL2|IRS2|ITPR1|KIT|MAP2K1|MAPK1|MAPK3|MDM2|MEF2C|MTOR|NR4A1|NRG1|NRTN|NTRK2|PDE1B|PDGFRA|PEBP1|PRKACA|PSMB1|PSMC4|RAF1|RBX1|RPS6KA2|STAT3|TEK|TP53|UBB|UBC	387/43622 genes: 0,89%
Alzheimer's disease	KEGG:hsa05010	2.92e-33	4.42e-30	31	APAF1|APBB1|BAD|BID|CALM1|CALM2|CASP3|CASP7|CASP8|CASP9|CDK5R1|COX5A|COX6A1|COX6B1|COX7A2|COX7A2L|CYC1|CYCS|FAS|GSK3B|IL1B|ITPR1|MAPK1|MAPK3|MAPT|PSEN1|RTN4|SDHB|SNCA|TNF|UQCRC1	171/43622 genes: 0,39%
MAPK signaling pathway	KEGG:hsa04010	5.05e-33	7.65e-30	35	AKT1|BDNF|CACNA1E|CASP3|ELK1|FAS|FASLG|FGFR3|FOS|GADD45A|GRB2|HSPA1B|HSPA8|IL1B|JUN|MAP2K1|MAP2K6|MAPK1|MAPK3|MAPT|MEF2C|MYC|NFKB1|NR4A1|NTRK2|PDGFRA|PRKACA|RAF1|RELA|RPS6KA2|STMN1|TGFB1|TNF|TP53|TRAF6	255/43622 genes: 0,58%
Developmental Biology	REACT:R-HSA-1266738	1.36e-32	2.06e-29	59	ACTG1|ADAM22|AKT1|CALM1|CALM2|CDK5R1|CEBPD|CREB1|DNM2|EFNB1|FGFR3|GRB2|GSK3B|H2AC20|H2AC6|H2BC9|HDAC3|HSP90AA1|HSP90AB1|HSPA8|IL2|IRS2|JUN|KCNQ2|KDR|KIT|KRT6A|LIMK2|MAP2K1|MAP2K6|MAPK1|MAPK3|MEF2C|NEUROD1|NFKB1|NRG1|NRTN|NTN1|PAX6|PDGFRA|PEBP1|POLR2K|PRKACA|PSMB1|PSMC4|RAF1|RBX1|RELA|ROCK1|RPS6KA2|SEMA4D|STAT3|TEK|TGFB1|TNF|UBB|UBC|VEGFA|WNT1	1076/43622 genes: 2,47%
Gene Expression	REACT:R-HSA-74160	2.56e-32	3.88e-29	74	AGO3|AKT1|APAF1|AR|BAX|BBC3|BID|BNIP3L|BRF1|CASP1|CDC25C|CDK2|CDK5R1|CDKN1A|CDKN2A|COX5A|COX6A1|COX6B1|COX7A2L|CYCS|DDIT4|DDX5|E2F1|EEF1A1|EEF1G|FAS|FOS|GADD45A|GSK3B|GSR|H2AC20|H2AC6|H2BC9|HNRNPK|HNRNPM|HSP90AA1|HSPA8|JUN|KIT|MAP2K6|MAPK3|MBD3|MDM2|MDM4|MTOR|MYC|NFIB|NR4A1|NR4A2|PCNA|PMAIP1|POLR1C|POLR2K|PRDX1|PRDX2|PSMB1|PSMC4|RPL12|RPL19|RPL41|RPL8|RPL9|RPS12|RPS15|RPS27|SERPINE1|SIRT1|SUMO1|T…	1831/43622 genes: 4,20%
Proteoglycans in cancer	KEGG:hsa05205	2.94e-32	4.45e-29	32	ACTG1|AKT1|CASP3|CCND1|CDKN1A|CTSL|DDX5|ELK1|FAS|FASLG|GRB2|IGF1|ITPR1|KDR|MAP2K1|MAPK1|MAPK3|MDM2|MTOR|MYC|PLAUR|PLCE1|PRKACA|RAF1|ROCK1|STAT3|TGFB1|TNF|TP53|VEGFA|WNT1|WNT5A	203/43622 genes: 0,47%
Transcriptional Regulation by TP53	REACT:R-HSA-3700989	3.36e-32	5.1e-29	39	AGO3|AKT1|APAF1|BAX|BBC3|BID|BNIP3L|CASP1|CDC25C|CDK2|CDK5R1|CDKN1A|CDKN2A|COX5A|COX6A1|COX6B1|COX7A2L|CYCS|DDIT4|E2F1|FAS|FOS|GADD45A|GSR|JUN|MAP2K6|MBD3|MDM2|MDM4|MTOR|PCNA|PMAIP1|POLR2K|PRDX1|PRDX2|TP53|TXNRD1|UBB|UBC	370/43622 genes: 0,85%
Fc epsilon receptor (FCERI) signaling	REACT:R-HSA-2454202	7.68e-32	1.16e-28	39	AGO3|AKT1|BAD|CALM1|CALM2|CASP9|CDKN1A|CREB1|FGFR3|FOS|GRB2|GSK3B|IL2|IRS2|ITPR1|JUN|KIT|MAP2K1|MAPK1|MAPK3|MDM2|MTOR|NFKB1|NFKBIA|NR4A1|NRG1|NRTN|PDGFRA|PEBP1|PSMB1|PSMC4|RAF1|RBX1|RELA|TEK|TP53|TRAF6|UBB|UBC	378/43622 genes: 0,87%
Non-alcoholic fatty liver disease (NAFLD)	KEGG:hsa04932	1.31e-30	1.99e-27	28	AKT1|BAX|BCL2L11|BID|CASP3|CASP7|CASP8|COX5A|COX6A1|COX6B1|COX7A2|COX7A2L|CXCL8|CYC1|CYCS|CYP2E1|FAS|FASLG|GSK3B|IL1B|IRS2|JUN|NFKB1|RELA|SDHB|TGFB1|TNF|UQCRC1	149/43622 genes: 0,34%
MicroRNAs in cancer	KEGG:hsa05206	1.43e-30	2.17e-27	35	BAK1|BCL2|BCL2L11|CASP3|CCND1|CCND2|CDC25C|CDKN1A|CDKN2A|DDIT4|E2F1|FGFR3|GRB2|HMGA2|HMOX1|HNRNPK|IRS2|MAP2K1|MAPK1|MCL1|MDM2|MDM4|MTOR|MYC|NFKB1|PDGFRA|PTGS2|RAF1|ROCK1|SIRT1|STAT3|STMN1|TNR|TP53|VEGFA	299/43622 genes: 0,69%
IL-17 signaling pathway	KEGG:hsa04657	5.2e-30	7.88e-27	24	CASP3|CASP8|CCL2|CXCL10|CXCL8|FOS|GSK3B|HSP90AA1|HSP90AB1|IFNG|IL1B|JUN|MAPK1|MAPK15|MAPK3|NFKB1|NFKBIA|PTGS2|RELA|S100A8|S100A9|TNF|TNFAIP3|TRAF6	93/43622 genes: 0,21%
p53 signaling pathway	KEGG:hsa04115	6.35e-30	9.63e-27	22	ADGRB1|APAF1|BAX|BBC3|BID|CASP3|CASP8|CASP9|CCND1|CCND2|CDK2|CDKN1A|CDKN2A|CYCS|FAS|GADD45A|IGF1|MDM2|MDM4|PMAIP1|SERPINE1|TP53	69/43622 genes: 0,16%
Diseases of signal transduction	REACT:R-HSA-5663202	9.43e-30	1.43e-26	37	AKT1|BAD|BCL2L11|CASP9|CDKN1A|CREB1|DLL1|FGFR3|GRB2|GSK3B|HDAC3|HDAC6|HEY2|HEYL|HSP90AA1|IRS2|KIT|MACF1|MAP2K1|MAPK1|MAPK3|MDM2|MTOR|MYC|NR4A1|NRG1|PDGFRA|PEBP1|POLR2K|PSMB1|PSMC4|RAF1|RBX1|STAT3|TGFB1|UBB|UBC	370/43622 genes: 0,85%
Downstream signal transduction	REACT:R-HSA-186763	2.57e-29	3.9e-26	36	AGO3|AKT1|BAD|CALM1|CALM2|CASP9|CDKN1A|CREB1|FGFR3|GRB2|GSK3B|IL2|IRS2|ITPR1|KIT|MAP2K1|MAPK1|MAPK3|MDM2|MTOR|NR4A1|NRG1|NRTN|PDE1B|PDGFRA|PEBP1|PRKACA|PSMB1|PSMC4|RAF1|RBX1|STAT3|TEK|TP53|UBB|UBC	352/43622 genes: 0,81%
Legionellosis	KEGG:hsa05134	1.14e-28	1.72e-25	20	APAF1|BNIP3|CASP1|CASP3|CASP7|CASP8|CASP9|CXCL8|CYCS|EEF1A1|EEF1G|HSF1|HSPA1B|HSPA8|IL1B|ITGAM|NFKB1|NFKBIA|RELA|TNF	55/43622 genes: 0,13%
Tuberculosis	KEGG:hsa05152	2.5e-28	3.79e-25	28	AKT1|APAF1|ATP6V0B|ATP6V0C|BAD|BAX|BCL2|BID|CALM1|CALM2|CAMP|CASP3|CASP8|CASP9|CREB1|CYCS|IFNG|IL1B|ITGAM|MAPK1|MAPK3|NFKB1|NOS2|RAF1|RELA|TGFB1|TNF|TRAF6	178/43622 genes: 0,41%
Signaling by PDGF	REACT:R-HSA-186797	2.65e-28	4.02e-25	36	AGO3|AKT1|BAD|CALM1|CALM2|CASP9|CDKN1A|CREB1|FGFR3|GRB2|GSK3B|IL2|IRS2|ITPR1|KIT|MAP2K1|MAPK1|MAPK3|MDM2|MTOR|NR4A1|NRG1|NRTN|PDE1B|PDGFRA|PEBP1|PRKACA|PSMB1|PSMC4|RAF1|RBX1|STAT3|TEK|TP53|UBB|UBC	376/43622 genes: 0,86%
Endocrine resistance	KEGG:hsa01522	4.26e-28	6.45e-25	23	AKT1|BAD|BAX|BCL2|BIK|CCND1|CDKN1A|CDKN2A|DLL1|E2F1|FOS|GRB2|IGF1|JUN|MAP2K1|MAPK1|MAPK3|MDM2|MTOR|PRKACA|RAF1|RB1|TP53	95/43622 genes: 0,22%
Metabolism of proteins	REACT:R-HSA-392499	4.54e-28	6.88e-25	65	ACHE|ACO2|AR|ARF3|BECN1|CALM1|CALM2|CCL2|CDKN2A|COPE|CXCL8|CYC1|EEF1A1|EEF1G|GNG5|GNGT2|H2AC20|H2AC6|H2BC9|HDAC3|HNRNPK|HSPA5|HSPA8|IGF1|INHBA|MDM2|MDM4|MFGE8|MUC6|MYC|NFKBIA|PAX6|PCNA|PIGC|PLAUR|PRKN|PRL|PSMB1|PSMC4|RIPK1|RPL12|RPL19|RPL41|RPL8|RPL9|RPS12|RPS15|RPS27|RTN4RL2|SNCA|STAT3|SUMO1|TGFB1|TIMM13|TNFAIP3|TP53|TRAF6|TSHB|TUBA1A|TUBA1B|UBA1|UBB|UBC|UCHL1|UCHL5	1623/43622 genes: 3,72%
DAP12 signaling	REACT:R-HSA-2424491	6.18e-28	9.37e-25	35	AGO3|AKT1|BAD|CALM1|CALM2|CASP9|CDKN1A|CREB1|FGFR3|GRB2|GSK3B|IL2|IRS2|ITPR1|KIT|MAP2K1|MAPK1|MAPK3|MDM2|MTOR|NR4A1|NRG1|NRTN|PDE1B|PDGFRA|PEBP1|PRKACA|PSMB1|PSMC4|RAF1|RBX1|TEK|TP53|UBB|UBC	356/43622 genes: 0,82%
Interleukin-4 and 13 signaling	REACT:R-HSA-6785807	1.14e-27	1.73e-24	24	AKT1|BCL2|BCL2L1|CCL2|CCND1|CDKN1A|CEBPD|CXCL8|FASLG|FOS|HMOX1|HSP90AA1|HSPA8|IL1B|ITGAM|MCL1|MYC|NOS2|PTGS2|STAT3|TGFB1|TNF|TP53|VEGFA	114/43622 genes: 0,26%
Signaling by EGFR	REACT:R-HSA-177929	1.33e-27	2.01e-24	35	AGO3|AKT1|BAD|CALM1|CALM2|CASP9|CDKN1A|CREB1|FGFR3|GRB2|GSK3B|IL2|IRS2|ITPR1|KIT|MAP2K1|MAPK1|MAPK3|MDM2|MTOR|NR4A1|NRG1|NRTN|PDE1B|PDGFRA|PEBP1|PRKACA|PSMB1|PSMC4|RAF1|RBX1|TEK|TP53|UBB|UBC	364/43622 genes: 0,83%
HIF-1 signaling pathway	KEGG:hsa04066	2.02e-27	3.06e-24	23	AKT1|BCL2|CDKN1A|ENO1|ENO2|HK1|HMOX1|IFNG|IGF1|MAP2K1|MAPK1|MAPK3|MTOR|NFKB1|NOS2|NOX1|PDHA1|RBX1|RELA|SERPINE1|STAT3|TEK|VEGFA	101/43622 genes: 0,23%
Apoptosis	REACT:R-HSA-109581	2.49e-27	3.77e-24	27	AKT1|APAF1|BAD|BAK1|BAX|BBC3|BCL2|BCL2L1|BCL2L11|BID|CASP3|CASP7|CASP8|CASP9|CYCS|E2F1|FAS|FASLG|MAPT|PMAIP1|PSMB1|PSMC4|RIPK1|ROCK1|TP53|UBB|UBC	172/43622 genes: 0,39%
DAP12 interactions	REACT:R-HSA-2172127	2.54e-27	3.86e-24	35	AGO3|AKT1|BAD|CALM1|CALM2|CASP9|CDKN1A|CREB1|FGFR3|GRB2|GSK3B|IL2|IRS2|ITPR1|KIT|MAP2K1|MAPK1|MAPK3|MDM2|MTOR|NR4A1|NRG1|NRTN|PDE1B|PDGFRA|PEBP1|PRKACA|PSMB1|PSMC4|RAF1|RBX1|TEK|TP53|UBB|UBC	371/43622 genes: 0,85%
Programmed Cell Death	REACT:R-HSA-5357801	4.04e-27	6.13e-24	27	AKT1|APAF1|BAD|BAK1|BAX|BBC3|BCL2|BCL2L1|BCL2L11|BID|CASP3|CASP7|CASP8|CASP9|CYCS|E2F1|FAS|FASLG|MAPT|PMAIP1|PSMB1|PSMC4|RIPK1|ROCK1|TP53|UBB|UBC	175/43622 genes: 0,40%
Intrinsic Pathway for Apoptosis	REACT:R-HSA-109606	4.68e-27	7.1e-24	18	AKT1|APAF1|BAD|BAK1|BAX|BBC3|BCL2|BCL2L1|BCL2L11|BID|CASP3|CASP7|CASP8|CASP9|CYCS|E2F1|PMAIP1|TP53	44/43622 genes: 0,10%
Viral carcinogenesis	KEGG:hsa05203	8.41e-27	1.27e-23	28	BAD|BAK1|BAX|CASP3|CASP8|CCND1|CCND2|CDK2|CDKN1A|CDKN2A|CREB1|GRB2|H2BC9|HDAC3|HDAC6|HNRNPK|JUN|MAPK1|MAPK3|MDM2|NFKB1|NFKBIA|PMAIP1|PRKACA|RB1|RELA|STAT3|TP53	201/43622 genes: 0,46%
Signaling by SCF-KIT	REACT:R-HSA-1433557	2.46e-26	3.72e-23	33	AGO3|AKT1|BAD|CALM1|CALM2|CASP9|CDKN1A|CREB1|FGFR3|GRB2|GSK3B|IL2|IRS2|KIT|MAP2K1|MAPK1|MAPK3|MDM2|MTOR|NR4A1|NRG1|NRTN|PDGFRA|PEBP1|PSMB1|PSMC4|RAF1|RBX1|STAT3|TEK|TP53|UBB|UBC	337/43622 genes: 0,77%
Signaling by the B Cell Receptor (BCR)	REACT:R-HSA-983705	3.2e-26	4.84e-23	29	AGO3|AKT1|BAD|CALM1|CALM2|CASP9|CDKN1A|CREB1|FGFR3|GRB2|GSK3B|IRS2|ITPR1|KIT|MAPK1|MAPK3|MDM2|MTOR|NFKB1|NFKBIA|NR4A1|NRG1|PDGFRA|PSMB1|PSMC4|RELA|TP53|UBB|UBC	234/43622 genes: 0,54%
Toxoplasmosis	KEGG:hsa05145	3.35e-26	5.08e-23	23	AKT1|BAD|BCL2|BCL2L1|CASP3|CASP8|CASP9|CYCS|HSPA1B|HSPA8|IFNG|LAMC2|MAP2K6|MAPK1|MAPK3|NFKB1|NFKBIA|NOS2|RELA|STAT3|TGFB1|TNF|TRAF6	113/43622 genes: 0,26%
Chronic myeloid leukemia	KEGG:hsa05220	4.54e-26	6.89e-23	20	AKT1|BAD|BCL2L1|CCND1|CDKN1A|CDKN2A|E2F1|GRB2|MAP2K1|MAPK1|MAPK3|MDM2|MYC|NFKB1|NFKBIA|RAF1|RB1|RELA|TGFB1|TP53	71/43622 genes: 0,16%
FoxO signaling pathway	KEGG:hsa04068	4.96e-26	7.52e-23	24	AKT1|ATG12|BCL2L11|BNIP3|CAT|CCND1|CCND2|CDK2|CDKN1A|FASLG|GADD45A|GRB2|IGF1|IRS2|KLF2|MAP2K1|MAPK1|MAPK3|MDM2|RAF1|SIRT1|SOD2|STAT3|TGFB1	132/43622 genes: 0,30%
AGE-RAGE signaling pathway in diabetic complications	KEGG:hsa04933	5.02e-26	7.61e-23	22	AKT1|BAX|BCL2|CASP3|CCL2|CCND1|CXCL8|F3|IL1B|JUN|MAPK1|MAPK3|NFKB1|NOX1|PLCE1|PRKCZ|RELA|SERPINE1|STAT3|TGFB1|TNF|VEGFA	99/43622 genes: 0,23%
Axon guidance	REACT:R-HSA-422475	1.05e-25	1.59e-22	39	ACTG1|CALM1|CALM2|CDK5R1|CREB1|DNM2|EFNB1|FGFR3|GRB2|GSK3B|HSP90AA1|HSP90AB1|HSPA8|IL2|IRS2|KCNQ2|KDR|KIT|LIMK2|MAP2K1|MAPK1|MAPK3|NRG1|NRTN|NTN1|PDGFRA|PEBP1|PRKACA|PSMB1|PSMC4|RAF1|RBX1|ROCK1|RPS6KA2|SEMA4D|TEK|UBB|UBC|VEGFA	550/43622 genes: 1,26%
Generic Transcription Pathway	REACT:R-HSA-212436	1.17e-25	1.78e-22	47	AGO3|AKT1|APAF1|AR|BAX|BBC3|BID|BNIP3L|CASP1|CDC25C|CDK2|CDK5R1|CDKN1A|CDKN2A|COX5A|COX6A1|COX6B1|COX7A2L|CYCS|DDIT4|E2F1|FAS|FOS|GADD45A|GSR|JUN|KIT|MAP2K6|MBD3|MDM2|MDM4|MTOR|MYC|NR4A1|NR4A2|PCNA|PMAIP1|POLR2K|PRDX1|PRDX2|SERPINE1|SUMO1|TP53|TXNRD1|UBB|UBC|VEGFA	873/43622 genes: 2,00%
Neurotrophin signaling pathway	KEGG:hsa04722	1.2e-25	1.82e-22	23	AKT1|BAD|BAX|BCL2|BDNF|CALM1|CALM2|FASLG|GRB2|GSK3B|JUN|MAP2K1|MAPK1|MAPK3|NFKB1|NFKBIA|NTRK2|PSEN1|RAF1|RELA|RPS6KA2|TP53|TRAF6	119/43622 genes: 0,27%
VEGFA-VEGFR2 Pathway	REACT:R-HSA-4420097	1.96e-25	2.97e-22	32	AKT1|CALM1|CALM2|FGFR3|GRB2|HSP90AA1|IL2|IRS2|ITPR1|KDR|KIT|MAP2K1|MAPK1|MAPK3|MTOR|NCF1|NRG1|NRTN|PDGFRA|PEBP1|PRKACA|PRKCZ|PSMB1|PSMC4|PTK2B|RAF1|RBX1|ROCK1|TEK|UBB|UBC|VEGFA	330/43622 genes: 0,76%
TNF signaling pathway	KEGG:hsa04668	4.01e-25	6.08e-22	22	AKT1|CASP3|CASP7|CASP8|CCL2|CREB1|CXCL10|FAS|FOS|IL1B|JUN|MAP2K1|MAP2K6|MAPK1|MAPK3|NFKB1|NFKBIA|PTGS2|RELA|RIPK1|TNF|TNFAIP3	108/43622 genes: 0,25%
Signaling by VEGF	REACT:R-HSA-194138	4.15e-25	6.29e-22	32	AKT1|CALM1|CALM2|FGFR3|GRB2|HSP90AA1|IL2|IRS2|ITPR1|KDR|KIT|MAP2K1|MAPK1|MAPK3|MTOR|NCF1|NRG1|NRTN|PDGFRA|PEBP1|PRKACA|PRKCZ|PSMB1|PSMC4|PTK2B|RAF1|RBX1|ROCK1|TEK|UBB|UBC|VEGFA	338/43622 genes: 0,77%
EGFR tyrosine kinase inhibitor resistance	KEGG:hsa01521	5.06e-25	7.67e-22	20	AKT1|BAD|BAX|BCL2|BCL2L1|BCL2L11|FGFR3|GRB2|GSK3B|IGF1|KDR|MAP2K1|MAPK1|MAPK3|MTOR|NRG1|PDGFRA|RAF1|STAT3|VEGFA	79/43622 genes: 0,18%
Influenza A	KEGG:hsa05164	1.84e-24	2.79e-21	25	ACTG1|AKT1|CASP1|CASP9|CCL2|CXCL10|CXCL8|CYCS|FAS|FASLG|GSK3B|HSPA1B|HSPA8|IFNG|IL1B|JUN|MAP2K1|MAP2K6|MAPK1|MAPK3|NFKB1|NFKBIA|RAF1|RELA|TNF	173/43622 genes: 0,40%
Toll-Like Receptors Cascades	REACT:R-HSA-168898	2.05e-24	3.11e-21	24	CASP8|CREB1|CTSL|DNM2|ELK1|FOS|ITGAM|JUN|MAP2K1|MAP2K6|MAPK1|MAPK3|MEF2C|NFKB1|NFKBIA|PTPN4|RELA|RIPK1|RPS6KA2|S100A8|S100A9|TRAF6|UBB|UBC	153/43622 genes: 0,35%
Downstream signaling events of B Cell Receptor (BCR)	REACT:R-HSA-1168372	2.41e-24	3.65e-21	26	AGO3|AKT1|BAD|CASP9|CDKN1A|CREB1|FGFR3|GRB2|GSK3B|IRS2|KIT|MAPK1|MAPK3|MDM2|MTOR|NFKB1|NFKBIA|NR4A1|NRG1|PDGFRA|PSMB1|PSMC4|RELA|TP53|UBB|UBC	197/43622 genes: 0,45%
Colorectal cancer	KEGG:hsa05210	3.77e-24	5.71e-21	18	AKT1|BAD|BAX|BCL2|CASP3|CASP9|CCND1|CYCS|FOS|GSK3B|JUN|MAP2K1|MAPK1|MAPK3|MYC|RAF1|TGFB1|TP53	60/43622 genes: 0,14%
Chagas disease (American trypanosomiasis)	KEGG:hsa05142	3.84e-24	5.83e-21	21	AKT1|CASP8|CCL2|CXCL8|FAS|FASLG|FOS|IFNG|IL1B|IL2|JUN|MAPK1|MAPK3|NFKB1|NFKBIA|NOS2|RELA|SERPINE1|TGFB1|TNF|TRAF6	102/43622 genes: 0,23%
Parkinson's disease	KEGG:hsa05012	8.83e-24	1.34e-20	23	APAF1|CASP3|CASP9|COX5A|COX6A1|COX6B1|COX7A2|COX7A2L|CYC1|CYCS|DRD2|LRRK2|PRKACA|PRKN|SDHB|SLC18A2|SLC6A3|SNCA|TH|UBA1|UBB|UCHL1|UQCRC1	142/43622 genes: 0,33%
Breast cancer	KEGG:hsa05224	1.23e-23	1.87e-20	23	AKT1|CCND1|CDKN1A|DLL1|E2F1|FOS|GRB2|GSK3B|HEY2|HEYL|IGF1|JUN|KIT|MAP2K1|MAPK1|MAPK3|MTOR|MYC|RAF1|RB1|TP53|WNT1|WNT5A	144/43622 genes: 0,33%
Apoptosis - multiple species	KEGG:hsa04215	1.27e-23	1.93e-20	15	APAF1|BAK1|BAX|BBC3|BCL2|BCL2L1|BCL2L11|BECN1|BID|CASP3|CASP7|CASP8|CASP9|CYCS|PMAIP1	33/43622 genes: 0,08%
Glioma	KEGG:hsa05214	1.43e-23	2.16e-20	18	AKT1|CALM1|CALM2|CCND1|CDKN1A|CDKN2A|E2F1|GRB2|IGF1|MAP2K1|MAPK1|MAPK3|MDM2|MTOR|PDGFRA|RAF1|RB1|TP53	64/43622 genes: 0,15%
Pancreatic cancer	KEGG:hsa05212	1.43e-23	2.16e-20	18	AKT1|BAD|BCL2L1|CASP9|CCND1|CDKN2A|E2F1|MAP2K1|MAPK1|MAPK3|NFKB1|RAF1|RB1|RELA|STAT3|TGFB1|TP53|VEGFA	64/43622 genes: 0,15%
Cellular Senescence	REACT:R-HSA-2559583	4.46e-23	6.76e-20	25	AGO3|CDK2|CDKN1A|CDKN2A|CXCL8|E2F1|FOS|H2AC20|H2AC6|H2BC9|HMGA2|JUN|MAP2K6|MAPK1|MAPK3|MDM2|MDM4|NFKB1|RB1|RELA|RPS6KA2|STAT3|TP53|UBB|UBC	196/43622 genes: 0,45%
Epstein-Barr virus infection	KEGG:hsa05169	7.43e-23	1.13e-19	25	AKT1|BCL2|CDK2|CDKN1A|GSK3B|HSPA1B|HSPA8|IFNG|JUN|MAP2K6|MDM2|MYC|NFKB1|NFKBIA|POLR1C|POLR2K|PRKACA|PSMC4|RB1|RELA|RIPK1|STAT3|TNFAIP3|TP53|TRAF6	200/43622 genes: 0,46%
Small cell lung cancer	KEGG:hsa05222	8.34e-23	1.26e-19	19	AKT1|APAF1|BCL2|BCL2L1|CASP9|CCND1|CDK2|CYCS|E2F1|LAMC2|MYC|NFKB1|NFKBIA|NOS2|PTGS2|RB1|RELA|TP53|TRAF6	84/43622 genes: 0,19%
HTLV-I infection	KEGG:hsa05166	1.34e-22	2.03e-19	27	AKT1|BAX|BCL2L1|CCND1|CCND2|CDKN1A|CDKN2A|CREB1|E2F1|ELK1|FOS|GSK3B|IL2|JUN|MYC|NFKB1|NFKBIA|PCNA|PDGFRA|PRKACA|RB1|RELA|TGFB1|TNF|TP53|WNT1|WNT5A	256/43622 genes: 0,59%
Toll Like Receptor 4 (TLR4) Cascade	REACT:R-HSA-166016	4.31e-22	6.53e-19	21	CASP8|CREB1|DNM2|ELK1|FOS|ITGAM|JUN|MAP2K1|MAP2K6|MAPK1|MAPK3|MEF2C|NFKB1|NFKBIA|PTPN4|RELA|RIPK1|RPS6KA2|TRAF6|UBB|UBC	126/43622 genes: 0,29%
Amyotrophic lateral sclerosis (ALS)	KEGG:hsa05014	5.75e-22	8.71e-19	16	APAF1|BAD|BAX|BCL2|BCL2L1|BID|CASP1|CASP3|CASP9|CAT|CYCS|GPX1|MAP2K6|SOD1|TNF|TP53	51/43622 genes: 0,12%
NOD-like receptor signaling pathway	KEGG:hsa04621	6.32e-22	9.59e-19	23	ATG12|BCL2|BCL2L1|CAMP|CASP1|CASP8|CCL2|CXCL8|HSP90AA1|HSP90AB1|IL1B|ITPR1|JUN|MAPK1|MAPK3|NFKB1|NFKBIA|NOX1|RELA|RIPK1|TNF|TNFAIP3|TRAF6	170/43622 genes: 0,39%
Bladder cancer	KEGG:hsa05219	7.37e-22	1.12e-18	15	CCND1|CDKN1A|CDKN2A|CXCL8|E2F1|FGFR3|MAP2K1|MAPK1|MAPK3|MDM2|MYC|RAF1|RB1|TP53|VEGFA	41/43622 genes: 0,09%
Ras signaling pathway	KEGG:hsa04014	1.78e-21	2.69e-18	25	AKT1|BAD|BCL2L1|CALM1|CALM2|ELK1|FASLG|FGFR3|GNG5|GNGT2|GRB2|IGF1|KDR|KIT|MAP2K1|MAPK1|MAPK3|NFKB1|PDGFRA|PLCE1|PRKACA|RAF1|RELA|TEK|VEGFA	227/43622 genes: 0,52%
Estrogen signaling pathway	KEGG:hsa04915	1.99e-21	3.01e-18	19	AKT1|CALM1|CALM2|CREB1|FKBP4|FKBP5|FOS|GRB2|HSP90AA1|HSP90AB1|HSPA1B|HSPA8|ITPR1|JUN|MAP2K1|MAPK1|MAPK3|PRKACA|RAF1	98/43622 genes: 0,22%
Hemostasis	REACT:R-HSA-109582	2.07e-21	3.13e-18	37	AKT1|ALB|ANXA2|CALM1|CALM2|CDK2|CLU|DGKI|F3|GNG5|GNGT2|GRB2|HSPA5|IGF1|IL2|ITGAM|ITPR1|KCNMA1|KIF1B|MAPK1|MAPK3|NOS2|PCDH7|PDE1B|PLAUR|PRKACA|PRKCZ|PSAP|RAF1|SERPINE1|SLC8A1|SOD1|TEK|TGFB1|TP53|VEGFA|VPS45	639/43622 genes: 1,46%
Alcoholism	KEGG:hsa05034	2.41e-21	3.65e-18	23	BDNF|CALM1|CALM2|CREB1|DRD2|GNG5|GNGT2|GRB2|H2AC20|H2AC6|H2BC9|HDAC3|HDAC6|MAP2K1|MAPK1|MAPK3|NTRK2|PDYN|PRKACA|RAF1|SLC18A2|SLC6A3|TH	180/43622 genes: 0,41%
Adaptive Immune System	REACT:R-HSA-1280218	2.56e-21	3.88e-18	41	AGO3|AKT1|BAD|CALM1|CALM2|CASP9|CD34|CDKN1A|CREB1|CTSL|DNM2|FGFR3|GRB2|GSK3B|HSPA5|IRS2|ITPR1|KIT|LRRC41|MAPK1|MAPK3|MDM2|MTOR|NCF1|NFKB1|NFKBIA|NR4A1|NRG1|PDGFRA|PRKACA|PRKN|PSMB1|PSMC4|RAF1|RBX1|RELA|TP53|TRAF6|UBA1|UBB|UBC	818/43622 genes: 1,88%
Chemokine signaling pathway	KEGG:hsa04062	3.11e-21	4.72e-18	23	AKT1|CCL19|CCL2|CCL21|CXCL10|CXCL8|GNG5|GNGT2|GRB2|GSK3B|MAP2K1|MAPK1|MAPK3|NCF1|NFKB1|NFKBIA|PRKACA|PRKCZ|PTK2B|RAF1|RELA|ROCK1|STAT3	182/43622 genes: 0,42%
Signaling by GPCR	REACT:R-HSA-372790	4.7e-21	7.13e-18	51	ADORA1|AKT1|CALM1|CALM2|CCL19|CCL21|CHRM2|CREB1|CXCL10|CXCL8|DGKI|DRD2|DRD4|DRD5|FGFR3|GNG5|GNGT2|GPR27|GRB2|HCRTR1|IL2|IRS2|ITPR1|KISS1|KIT|MAP2K1|MAPK1|MAPK3|NPS|NRG1|NRTN|P2RY4|PDE1B|PDGFRA|PDYN|PEBP1|PNOC|PRKACA|PSAP|PSMB1|PSMC4|RAF1|RBX1|ROCK1|RPS6KA2|TEK|TSHB|UBB|UBC|WNT1|WNT5A	1341/43622 genes: 3,07%
Leishmaniasis	KEGG:hsa05140	6.92e-21	1.05e-17	17	ELK1|FOS|IFNG|IL1B|ITGAM|JUN|MAPK1|MAPK3|NCF1|NFKB1|NFKBIA|NOS2|PTGS2|RELA|TGFB1|TNF|TRAF6	72/43622 genes: 0,17%
Huntington's disease	KEGG:hsa05016	1.21e-20	1.84e-17	23	APAF1|BAX|BBC3|BDNF|CASP3|CASP8|CASP9|COX5A|COX6A1|COX6B1|COX7A2|COX7A2L|CREB1|CYC1|CYCS|GPX1|ITPR1|POLR2K|SDHB|SOD1|SOD2|TP53|UQCRC1	193/43622 genes: 0,44%
Pertussis	KEGG:hsa05133	1.9e-20	2.88e-17	17	CALM1|CALM2|CASP1|CASP3|CASP7|CXCL8|FOS|IL1B|ITGAM|JUN|MAPK1|MAPK3|NFKB1|NOS2|RELA|TNF|TRAF6	76/43622 genes: 0,17%
Measles	KEGG:hsa05162	3.6e-20	5.46e-17	20	AKT1|BBC3|CCND1|CCND2|CDK2|FAS|FASLG|GSK3B|HSPA1B|HSPA8|IFNG|IL1B|IL2|NFKB1|NFKBIA|RELA|STAT3|TNFAIP3|TP53|TRAF6	133/43622 genes: 0,30%
VEGFR2 mediated cell proliferation	REACT:R-HSA-5218921	4.17e-20	6.33e-17	25	CALM1|CALM2|FGFR3|GRB2|IL2|IRS2|ITPR1|KDR|KIT|MAP2K1|MAPK1|MAPK3|NRG1|NRTN|PDGFRA|PEBP1|PRKCZ|PSMB1|PSMC4|RAF1|RBX1|TEK|UBB|UBC|VEGFA	258/43622 genes: 0,59%
Thyroid hormone signaling pathway	KEGG:hsa04919	5.87e-20	8.9e-17	19	ACTG1|AKT1|BAD|BMP4|CASP9|CCND1|DIO1|GSK3B|HDAC3|MAP2K1|MAPK1|MAPK3|MDM2|MTOR|MYC|PLCE1|PRKACA|RAF1|TP53	116/43622 genes: 0,27%
MyD88-independent TLR3/TLR4 cascade	REACT:R-HSA-166166	7.82e-20	1.19e-16	18	CASP8|CREB1|ELK1|FOS|JUN|MAP2K1|MAP2K6|MAPK1|MAPK3|MEF2C|NFKB1|NFKBIA|RELA|RIPK1|RPS6KA2|TRAF6|UBB|UBC	99/43622 genes: 0,23%
Toll Like Receptor 3 (TLR3) Cascade	REACT:R-HSA-168164	7.82e-20	1.19e-16	18	CASP8|CREB1|ELK1|FOS|JUN|MAP2K1|MAP2K6|MAPK1|MAPK3|MEF2C|NFKB1|NFKBIA|RELA|RIPK1|RPS6KA2|TRAF6|UBB|UBC	99/43622 genes: 0,23%
TRIF-mediated TLR3/TLR4 signaling	REACT:R-HSA-937061	7.82e-20	1.19e-16	18	CASP8|CREB1|ELK1|FOS|JUN|MAP2K1|MAP2K6|MAPK1|MAPK3|MEF2C|NFKB1|NFKBIA|RELA|RIPK1|RPS6KA2|TRAF6|UBB|UBC	99/43622 genes: 0,23%
Gastrin-CREB signalling pathway via PKC and MAPK	REACT:R-HSA-881907	1.96e-19	2.98e-16	30	CALM1|CALM2|CREB1|DGKI|FGFR3|GNG5|GNGT2|GRB2|HCRTR1|IL2|IRS2|ITPR1|KISS1|KIT|MAP2K1|MAPK1|MAPK3|NPS|NRG1|NRTN|PDGFRA|PEBP1|PSMB1|PSMC4|RAF1|RBX1|RPS6KA2|TEK|UBB|UBC	443/43622 genes: 1,02%
PIP3 activates AKT signaling	REACT:R-HSA-1257604	2.57e-19	3.89e-16	19	AGO3|AKT1|BAD|CASP9|CDKN1A|CREB1|FGFR3|GRB2|GSK3B|IRS2|KIT|MAPK1|MAPK3|MDM2|MTOR|NR4A1|NRG1|PDGFRA|TP53	125/43622 genes: 0,29%
cAMP signaling pathway	KEGG:hsa04024	3.95e-19	5.99e-16	22	ADORA1|AKT1|BAD|BDNF|CALM1|CALM2|CHRM2|CREB1|DRD2|DRD5|FOS|JUN|MAP2K1|MAPK1|MAPK3|NFKB1|NFKBIA|PLCE1|PRKACA|RAF1|RELA|ROCK1	198/43622 genes: 0,45%
GAB1 signalosome	REACT:R-HSA-180292	4.09e-19	6.2e-16	19	AGO3|AKT1|BAD|CASP9|CDKN1A|CREB1|FGFR3|GRB2|GSK3B|IRS2|KIT|MAPK1|MAPK3|MDM2|MTOR|NR4A1|NRG1|PDGFRA|TP53	128/43622 genes: 0,29%
PI3K/AKT activation	REACT:R-HSA-198203	4.09e-19	6.2e-16	19	AGO3|AKT1|BAD|CASP9|CDKN1A|CREB1|FGFR3|GRB2|GSK3B|IRS2|KIT|MAPK1|MAPK3|MDM2|MTOR|NR4A1|NRG1|PDGFRA|TP53	128/43622 genes: 0,29%
Focal adhesion	KEGG:hsa04510	4.41e-19	6.68e-16	22	ACTG1|AKT1|BAD|BCL2|CCND1|CCND2|ELK1|GRB2|GSK3B|IGF1|ITGB8|JUN|KDR|LAMC2|MAP2K1|MAPK1|MAPK3|PDGFRA|RAF1|ROCK1|TNR|VEGFA	199/43622 genes: 0,46%
Osteoclast differentiation	KEGG:hsa04380	4.76e-19	7.22e-16	19	AKT1|CREB1|FOS|GRB2|IFNG|IL1B|JUN|MAP2K1|MAP2K6|MAPK1|MAPK3|NCF1|NFKB1|NFKBIA|NOX1|RELA|TGFB1|TNF|TRAF6	129/43622 genes: 0,30%
MAPK family signaling cascades	REACT:R-HSA-5683057	7.14e-19	1.08e-15	25	AGO3|CALM1|CALM2|FGFR3|GRB2|IL2|IRS2|JUN|KIT|MAP2K1|MAPK1|MAPK3|MYC|NRG1|NRTN|PDGFRA|PEBP1|PRKACA|PSMB1|PSMC4|RAF1|RBX1|TEK|UBB|UBC	290/43622 genes: 0,66%
Signaling by Insulin receptor	REACT:R-HSA-74752	7.18e-19	1.09e-15	26	AKT1|ATP6V0B|ATP6V0C|ATP6V1C1|CALM1|CALM2|FGFR3|GRB2|IL2|IRS2|KIT|MAP2K1|MAPK1|MAPK3|MTOR|NRG1|NRTN|PDGFRA|PEBP1|PSMB1|PSMC4|RAF1|RBX1|TEK|UBB|UBC	322/43622 genes: 0,74%
Detoxification of Reactive Oxygen Species	REACT:R-HSA-3299685	1.17e-18	1.77e-15	13	CAT|CYCS|GPX1|GSR|GSTP1|NCF1|NOX4|PRDX1|PRDX2|PRDX3|SOD1|SOD2|TXNRD1	38/43622 genes: 0,09%
Activated TLR4 signalling	REACT:R-HSA-166054	1.32e-18	2e-15	18	CASP8|CREB1|ELK1|FOS|JUN|MAP2K1|MAP2K6|MAPK1|MAPK3|MEF2C|NFKB1|NFKBIA|RELA|RIPK1|RPS6KA2|TRAF6|UBB|UBC	115/43622 genes: 0,26%
Role of LAT2/NTAL/LAB on calcium mobilization	REACT:R-HSA-2730905	1.54e-18	2.33e-15	19	AGO3|AKT1|BAD|CASP9|CDKN1A|CREB1|FGFR3|GRB2|GSK3B|IRS2|KIT|MAPK1|MAPK3|MDM2|MTOR|NR4A1|NRG1|PDGFRA|TP53	137/43622 genes: 0,31%
Apelin signaling pathway	KEGG:hsa04371	1.77e-18	2.69e-15	19	AKT1|BECN1|CALM1|CALM2|CCND1|GNG5|GNGT2|ITPR1|KLF2|MAP2K1|MAPK1|MAPK3|MEF2C|MTOR|NOS2|PRKACA|RAF1|SERPINE1|SLC8A1	138/43622 genes: 0,32%
Metabolic pathways	KEGG:hsa01100	3.18e-18	4.82e-15	46	ACADS|ACO2|ALAS2|ALDH2|ALDH5A1|ALDOC|ATP6V0B|ATP6V0C|ATP6V1C1|CDIPT|COX5A|COX6A1|COX6B1|CYC1|CYCS|CYP1A1|CYP1A2|CYP2E1|DGKI|DLST|ENO1|ENO2|GCLC|GOT1|GPT|GUK1|HK1|HMOX1|IDH3A|MBOAT2|MTHFR|NOS2|ODC1|PDHA1|PGS1|PIGC|PLCE1|POLR1C|POLR2K|PTGES|PTGS2|SDHB|TH|TPI1|TPO|UQCRC1	1270/43622 genes: 2,91%
MyD88 cascade initiated on plasma membrane	REACT:R-HSA-975871	4.07e-18	6.17e-15	16	CREB1|ELK1|FOS|JUN|MAP2K1|MAP2K6|MAPK1|MAPK3|MEF2C|NFKB1|NFKBIA|RELA|RPS6KA2|TRAF6|UBB|UBC	84/43622 genes: 0,19%
Toll Like Receptor 10 (TLR10) Cascade	REACT:R-HSA-168142	4.07e-18	6.17e-15	16	CREB1|ELK1|FOS|JUN|MAP2K1|MAP2K6|MAPK1|MAPK3|MEF2C|NFKB1|NFKBIA|RELA|RPS6KA2|TRAF6|UBB|UBC	84/43622 genes: 0,19%
Toll Like Receptor 5 (TLR5) Cascade	REACT:R-HSA-168176	4.07e-18	6.17e-15	16	CREB1|ELK1|FOS|JUN|MAP2K1|MAP2K6|MAPK1|MAPK3|MEF2C|NFKB1|NFKBIA|RELA|RPS6KA2|TRAF6|UBB|UBC	84/43622 genes: 0,19%
Cell Cycle	REACT:R-HSA-1640170	4.37e-18	6.62e-15	33	AKT1|CCND1|CCND2|CDC25C|CDK2|CDK5RAP2|CDKN1A|CDKN2A|CEP290|E2F1|H2AC20|H2AC6|H2BC9|HSP90AA1|HSP90AB1|MAPK1|MAPK3|MDM2|MDM4|MYC|NIPBL|PCNA|PRKACA|PSMB1|PSMC4|RB1|RBX1|RPS27|SUMO1|TP53|TUBA1A|UBB|UBC	621/43622 genes: 1,42%
Melanoma	KEGG:hsa05218	5.43e-18	8.23e-15	15	AKT1|BAD|CCND1|CDKN1A|CDKN2A|E2F1|IGF1|MAP2K1|MAPK1|MAPK3|MDM2|PDGFRA|RAF1|RB1|TP53	69/43622 genes: 0,16%
Toll-like receptor signaling pathway	KEGG:hsa04620	5.62e-18	8.52e-15	17	AKT1|CASP8|CXCL10|CXCL8|FOS|IL1B|JUN|MAP2K1|MAP2K6|MAPK1|MAPK3|NFKB1|NFKBIA|RELA|RIPK1|TNF|TRAF6	104/43622 genes: 0,24%
Acute myeloid leukemia	KEGG:hsa05221	6.2e-18	9.39e-15	14	AKT1|BAD|CCND1|GRB2|KIT|MAP2K1|MAPK1|MAPK3|MTOR|MYC|NFKB1|RAF1|RELA|STAT3	55/43622 genes: 0,13%
Prolactin signaling pathway	KEGG:hsa04917	6.86e-18	1.04e-14	15	AKT1|CCND1|CCND2|FOS|GRB2|GSK3B|MAP2K1|MAPK1|MAPK3|NFKB1|PRL|RAF1|RELA|STAT3|TH	70/43622 genes: 0,16%
Autophagy - animal	KEGG:hsa04140	9.65e-18	1.46e-14	18	AKT1|ATG12|BAD|BCL2|BCL2L1|BECN1|BNIP3|CTSL|DDIT4|IRS2|ITPR1|MAP2K1|MAPK1|MAPK3|MTOR|PRKACA|RAF1|TRAF6	128/43622 genes: 0,29%
Cell Cycle, Mitotic	REACT:R-HSA-69278	1.2e-17	1.82e-14	30	AKT1|CCND1|CCND2|CDC25C|CDK2|CDK5RAP2|CDKN1A|CDKN2A|CEP290|E2F1|H2AC20|H2AC6|H2BC9|HSP90AA1|HSP90AB1|MAPK1|MAPK3|MYC|NIPBL|PCNA|PRKACA|PSMB1|PSMC4|RB1|RBX1|RPS27|TP53|TUBA1A|UBB|UBC	514/43622 genes: 1,18%
Non-small cell lung cancer	KEGG:hsa05223	1.41e-17	2.14e-14	14	AKT1|BAD|CASP9|CCND1|CDKN2A|E2F1|GRB2|MAP2K1|MAPK1|MAPK3|RAF1|RB1|STAT3|TP53	58/43622 genes: 0,13%
Senescence-Associated Secretory Phenotype (SASP)	REACT:R-HSA-2559582	1.51e-17	2.3e-14	17	CDK2|CDKN1A|CDKN2A|CXCL8|FOS|H2AC20|H2AC6|H2BC9|JUN|MAPK1|MAPK3|NFKB1|RELA|RPS6KA2|STAT3|UBB|UBC	110/43622 genes: 0,25%
TRAF6 mediated induction of NFkB and MAP kinases upon TLR7/8 or 9 activation	REACT:R-HSA-975138	1.58e-17	2.4e-14	16	CREB1|ELK1|FOS|JUN|MAP2K1|MAP2K6|MAPK1|MAPK3|MEF2C|NFKB1|NFKBIA|RELA|RPS6KA2|TRAF6|UBB|UBC	91/43622 genes: 0,21%
IGF1R signaling cascade	REACT:R-HSA-2428924	1.74e-17	2.64e-14	24	AKT1|CALM1|CALM2|FGFR3|GRB2|IGF1|IL2|IRS2|KIT|MAP2K1|MAPK1|MAPK3|MTOR|NRG1|NRTN|PDGFRA|PEBP1|PSMB1|PSMC4|RAF1|RBX1|TEK|UBB|UBC	298/43622 genes: 0,68%
IRS-related events triggered by IGF1R	REACT:R-HSA-2428928	1.74e-17	2.64e-14	24	AKT1|CALM1|CALM2|FGFR3|GRB2|IGF1|IL2|IRS2|KIT|MAP2K1|MAPK1|MAPK3|MTOR|NRG1|NRTN|PDGFRA|PEBP1|PSMB1|PSMC4|RAF1|RBX1|TEK|UBB|UBC	298/43622 genes: 0,68%
Signaling by Type 1 Insulin-like Growth Factor 1 Receptor (IGF1R)	REACT:R-HSA-2404192	1.88e-17	2.85e-14	24	AKT1|CALM1|CALM2|FGFR3|GRB2|IGF1|IL2|IRS2|KIT|MAP2K1|MAPK1|MAPK3|MTOR|NRG1|NRTN|PDGFRA|PEBP1|PSMB1|PSMC4|RAF1|RBX1|TEK|UBB|UBC	299/43622 genes: 0,69%
Jak-STAT signaling pathway	KEGG:hsa04630	1.88e-17	2.85e-14	19	AKT1|BCL2|BCL2L1|CCND1|CCND2|CDKN1A|CRLF2|GFAP|GRB2|IFNG|IL2|LIFR|MCL1|MTOR|MYC|PRL|RAF1|STAT3|STAT4	156/43622 genes: 0,36%
MyD88 dependent cascade initiated on endosome	REACT:R-HSA-975155	2.28e-17	3.46e-14	16	CREB1|ELK1|FOS|JUN|MAP2K1|MAP2K6|MAPK1|MAPK3|MEF2C|NFKB1|NFKBIA|RELA|RPS6KA2|TRAF6|UBB|UBC	93/43622 genes: 0,21%
Toll Like Receptor 7/8 (TLR7/8) Cascade	REACT:R-HSA-168181	2.28e-17	3.46e-14	16	CREB1|ELK1|FOS|JUN|MAP2K1|MAP2K6|MAPK1|MAPK3|MEF2C|NFKB1|NFKBIA|RELA|RPS6KA2|TRAF6|UBB|UBC	93/43622 genes: 0,21%
FCERI mediated MAPK activation	REACT:R-HSA-2871796	2.61e-17	3.95e-14	23	CALM1|CALM2|FGFR3|FOS|GRB2|IL2|IRS2|JUN|KIT|MAP2K1|MAPK1|MAPK3|NRG1|NRTN|PDGFRA|PEBP1|PSMB1|PSMC4|RAF1|RBX1|TEK|UBB|UBC	271/43622 genes: 0,62%
MyD88:Mal cascade initiated on plasma membrane	REACT:R-HSA-166058	3.26e-17	4.94e-14	16	CREB1|ELK1|FOS|JUN|MAP2K1|MAP2K6|MAPK1|MAPK3|MEF2C|NFKB1|NFKBIA|RELA|RPS6KA2|TRAF6|UBB|UBC	95/43622 genes: 0,22%
Toll Like Receptor 2 (TLR2) Cascade	REACT:R-HSA-181438	3.26e-17	4.94e-14	16	CREB1|ELK1|FOS|JUN|MAP2K1|MAP2K6|MAPK1|MAPK3|MEF2C|NFKB1|NFKBIA|RELA|RPS6KA2|TRAF6|UBB|UBC	95/43622 genes: 0,22%
Toll Like Receptor TLR1:TLR2 Cascade	REACT:R-HSA-168179	3.26e-17	4.94e-14	16	CREB1|ELK1|FOS|JUN|MAP2K1|MAP2K6|MAPK1|MAPK3|MEF2C|NFKB1|NFKBIA|RELA|RPS6KA2|TRAF6|UBB|UBC	95/43622 genes: 0,22%
Toll Like Receptor TLR6:TLR2 Cascade	REACT:R-HSA-168188	3.26e-17	4.94e-14	16	CREB1|ELK1|FOS|JUN|MAP2K1|MAP2K6|MAPK1|MAPK3|MEF2C|NFKB1|NFKBIA|RELA|RPS6KA2|TRAF6|UBB|UBC	95/43622 genes: 0,22%
Transmission across Chemical Synapses	REACT:R-HSA-112315	4.49e-17	6.8e-14	21	ACHE|ALDH2|ALDH5A1|CACNA1E|CALM1|CALM2|CPLX1|CREB1|GABRA6|GNG5|GNGT2|HSPA8|MAPK1|MDM2|PRKACA|RAF1|RPS6KA2|SLC18A2|SLC22A2|SLC5A7|SLC6A3	217/43622 genes: 0,50%
Toll Like Receptor 9 (TLR9) Cascade	REACT:R-HSA-168138	4.62e-17	7.01e-14	16	CREB1|ELK1|FOS|JUN|MAP2K1|MAP2K6|MAPK1|MAPK3|MEF2C|NFKB1|NFKBIA|RELA|RPS6KA2|TRAF6|UBB|UBC	97/43622 genes: 0,22%
Platelet activation, signaling and aggregation	REACT:R-HSA-76002	6.27e-17	9.51e-14	23	AKT1|ALB|CALM1|CALM2|CLU|DGKI|GNG5|GNGT2|GRB2|HSPA5|IGF1|IL2|ITPR1|MAPK1|MAPK3|PCDH7|PRKCZ|PSAP|RAF1|SERPINE1|SOD1|TGFB1|VEGFA	282/43622 genes: 0,65%
MAP kinase activation in TLR cascade	REACT:R-HSA-450294	6.4e-17	9.71e-14	14	CREB1|ELK1|FOS|JUN|MAP2K1|MAP2K6|MAPK1|MAPK3|MEF2C|NFKB1|RPS6KA2|TRAF6|UBB|UBC	64/43622 genes: 0,15%
Endometrial cancer	KEGG:hsa05213	7.04e-17	1.07e-13	13	AKT1|BAD|CASP9|CCND1|ELK1|GRB2|GSK3B|MAP2K1|MAPK1|MAPK3|MYC|RAF1|TP53	50/43622 genes: 0,11%
Signaling by Leptin	REACT:R-HSA-2586552	7.79e-17	1.18e-13	22	CALM1|CALM2|FGFR3|GRB2|IL2|IRS2|KIT|MAP2K1|MAPK1|MAPK3|NRG1|NRTN|PDGFRA|PEBP1|PSMB1|PSMC4|RAF1|RBX1|STAT3|TEK|UBB|UBC	253/43622 genes: 0,58%
Central carbon metabolism in cancer	KEGG:hsa05230	8.1e-17	1.23e-13	14	AKT1|FGFR3|HK1|KIT|MAP2K1|MAPK1|MAPK3|MTOR|MYC|PDGFRA|PDHA1|RAF1|SIRT3|TP53	65/43622 genes: 0,15%
Metabolism of amino acids and derivatives	REACT:R-HSA-71291	1.38e-16	2.09e-13	25	DIO1|DLST|GCLC|GOT1|GPT|GSR|NQO1|OAZ2|ODC1|PDHA1|PSMB1|PSMC4|RPL12|RPL19|RPL41|RPL8|RPL9|RPS12|RPS15|RPS27|SLC5A5|TH|TPO|TSHB|TXNRD1	362/43622 genes: 0,83%
IRS-mediated signalling	REACT:R-HSA-112399	1.57e-16	2.37e-13	23	AKT1|CALM1|CALM2|FGFR3|GRB2|IL2|IRS2|KIT|MAP2K1|MAPK1|MAPK3|MTOR|NRG1|NRTN|PDGFRA|PEBP1|PSMB1|PSMC4|RAF1|RBX1|TEK|UBB|UBC	294/43622 genes: 0,67%
Interleukin-2 signaling	REACT:R-HSA-451927	1.63e-16	2.47e-13	22	CALM1|CALM2|FGFR3|GRB2|IL2|IRS2|KIT|MAP2K1|MAPK1|MAPK3|NRG1|NRTN|PDGFRA|PEBP1|PSMB1|PSMC4|PTK2B|RAF1|RBX1|TEK|UBB|UBC	262/43622 genes: 0,60%
Insulin receptor signalling cascade	REACT:R-HSA-74751	1.95e-16	2.96e-13	23	AKT1|CALM1|CALM2|FGFR3|GRB2|IL2|IRS2|KIT|MAP2K1|MAPK1|MAPK3|MTOR|NRG1|NRTN|PDGFRA|PEBP1|PSMB1|PSMC4|RAF1|RBX1|TEK|UBB|UBC	297/43622 genes: 0,68%
RET signaling	REACT:R-HSA-8853659	3.08e-16	4.67e-13	22	CALM1|CALM2|FGFR3|GRB2|IL2|IRS2|KIT|MAP2K1|MAPK1|MAPK3|NRG1|NRTN|PDGFRA|PEBP1|PRKACA|PSMB1|PSMC4|RAF1|RBX1|TEK|UBB|UBC	270/43622 genes: 0,62%
Hepatitis C	KEGG:hsa05160	3.18e-16	4.82e-13	17	AKT1|BAD|CDKN1A|CXCL8|GRB2|GSK3B|MAPK1|MAPK3|NFKB1|NFKBIA|RAF1|RELA|RIPK1|STAT3|TNF|TP53|TRAF6	131/43622 genes: 0,30%
Cellular response to heat stress	REACT:R-HSA-3371556	3.18e-16	4.83e-13	15	DNAJB6|EEF1A1|FKBP4|GSK3B|HDAC6|HSF1|HSP90AA1|HSP90AB1|HSPA1B|HSPA5|HSPA8|MAPK1|MAPK3|MTOR|SIRT1	89/43622 genes: 0,20%
Interleukin-3, 5 and GM-CSF signaling	REACT:R-HSA-512988	3.33e-16	5.04e-13	22	CALM1|CALM2|FGFR3|GRB2|IL2|IRS2|KIT|MAP2K1|MAPK1|MAPK3|NRG1|NRTN|PDGFRA|PEBP1|PRKACA|PSMB1|PSMC4|RAF1|RBX1|TEK|UBB|UBC	271/43622 genes: 0,62%
Rap1 signaling pathway	KEGG:hsa04015	3.47e-16	5.26e-13	20	ACTG1|AKT1|CALM1|CALM2|DRD2|FGFR3|IGF1|ITGAM|KDR|KIT|MAP2K1|MAP2K6|MAPK1|MAPK3|PDGFRA|PLCE1|PRKCZ|RAF1|TEK|VEGFA	210/43622 genes: 0,48%
PI3K/AKT Signaling in Cancer	REACT:R-HSA-2219528	3.79e-16	5.75e-13	15	AKT1|BAD|CASP9|CDKN1A|CREB1|FGFR3|GRB2|GSK3B|IRS2|KIT|MDM2|MTOR|NR4A1|NRG1|PDGFRA	90/43622 genes: 0,21%
NCAM signaling for neurite out-growth	REACT:R-HSA-375165	4.88e-16	7.4e-13	22	CALM1|CALM2|CREB1|FGFR3|GRB2|IL2|IRS2|KIT|MAP2K1|MAPK1|MAPK3|NRG1|NRTN|PDGFRA|PEBP1|PSMB1|PSMC4|RAF1|RBX1|TEK|UBB|UBC	276/43622 genes: 0,63%
GRB2 events in EGFR signaling	REACT:R-HSA-179812	5.32e-16	8.06e-13	21	CALM1|CALM2|FGFR3|GRB2|IL2|IRS2|KIT|MAP2K1|MAPK1|MAPK3|NRG1|NRTN|PDGFRA|PEBP1|PSMB1|PSMC4|RAF1|RBX1|TEK|UBB|UBC	245/43622 genes: 0,56%
RAF/MAP kinase cascade	REACT:R-HSA-5673001	5.32e-16	8.06e-13	21	CALM1|CALM2|FGFR3|GRB2|IL2|IRS2|KIT|MAP2K1|MAPK1|MAPK3|NRG1|NRTN|PDGFRA|PEBP1|PSMB1|PSMC4|RAF1|RBX1|TEK|UBB|UBC	245/43622 genes: 0,56%
SHC1 events in EGFR signaling	REACT:R-HSA-180336	5.32e-16	8.06e-13	21	CALM1|CALM2|FGFR3|GRB2|IL2|IRS2|KIT|MAP2K1|MAPK1|MAPK3|NRG1|NRTN|PDGFRA|PEBP1|PSMB1|PSMC4|RAF1|RBX1|TEK|UBB|UBC	245/43622 genes: 0,56%
SOS-mediated signalling	REACT:R-HSA-112412	5.32e-16	8.06e-13	21	CALM1|CALM2|FGFR3|GRB2|IL2|IRS2|KIT|MAP2K1|MAPK1|MAPK3|NRG1|NRTN|PDGFRA|PEBP1|PSMB1|PSMC4|RAF1|RBX1|TEK|UBB|UBC	245/43622 genes: 0,56%
Neuronal System	REACT:R-HSA-112316	6.26e-16	9.49e-13	24	ACHE|ALDH2|ALDH5A1|CACNA1E|CALM1|CALM2|CPLX1|CREB1|GABRA6|GNG5|GNGT2|HSPA8|KCNA2|KCNMA1|KCNQ2|MAPK1|MDM2|PRKACA|RAF1|RPS6KA2|SLC18A2|SLC22A2|SLC5A7|SLC6A3	349/43622 genes: 0,80%
ARMS-mediated activation	REACT:R-HSA-170984	7.37e-16	1.12e-12	21	CALM1|CALM2|FGFR3|GRB2|IL2|IRS2|KIT|MAP2K1|MAPK1|MAPK3|NRG1|NRTN|PDGFRA|PEBP1|PSMB1|PSMC4|RAF1|RBX1|TEK|UBB|UBC	249/43622 genes: 0,57%
Signalling to p38 via RIT and RIN	REACT:R-HSA-187706	7.37e-16	1.12e-12	21	CALM1|CALM2|FGFR3|GRB2|IL2|IRS2|KIT|MAP2K1|MAPK1|MAPK3|NRG1|NRTN|PDGFRA|PEBP1|PSMB1|PSMC4|RAF1|RBX1|TEK|UBB|UBC	249/43622 genes: 0,57%
NF-kappa B signaling pathway	KEGG:hsa04064	7.49e-16	1.14e-12	15	BCL2|BCL2A1|BCL2L1|CCL19|CCL21|CXCL8|IL1B|NFKB1|NFKBIA|PTGS2|RELA|RIPK1|TNF|TNFAIP3|TRAF6	94/43622 genes: 0,22%
Frs2-mediated activation	REACT:R-HSA-170968	8e-16	1.21e-12	21	CALM1|CALM2|FGFR3|GRB2|IL2|IRS2|KIT|MAP2K1|MAPK1|MAPK3|NRG1|NRTN|PDGFRA|PEBP1|PSMB1|PSMC4|RAF1|RBX1|TEK|UBB|UBC	250/43622 genes: 0,57%
MAPK1/MAPK3 signaling	REACT:R-HSA-5684996	8.67e-16	1.31e-12	21	CALM1|CALM2|FGFR3|GRB2|IL2|IRS2|KIT|MAP2K1|MAPK1|MAPK3|NRG1|NRTN|PDGFRA|PEBP1|PSMB1|PSMC4|RAF1|RBX1|TEK|UBB|UBC	251/43622 genes: 0,58%
Signaling pathways regulating pluripotency of stem cells	KEGG:hsa04550	8.79e-16	1.33e-12	17	AKT1|BMP4|FGFR3|GRB2|GSK3B|IGF1|INHBA|LIFR|MAP2K1|MAPK1|MAPK3|MYC|PAX6|RAF1|STAT3|WNT1|WNT5A	139/43622 genes: 0,32%
Prolonged ERK activation events	REACT:R-HSA-169893	9.39e-16	1.42e-12	21	CALM1|CALM2|FGFR3|GRB2|IL2|IRS2|KIT|MAP2K1|MAPK1|MAPK3|NRG1|NRTN|PDGFRA|PEBP1|PSMB1|PSMC4|RAF1|RBX1|TEK|UBB|UBC	252/43622 genes: 0,58%
Interleukin receptor SHC signaling	REACT:R-HSA-912526	1.19e-15	1.81e-12	21	CALM1|CALM2|FGFR3|GRB2|IL2|IRS2|KIT|MAP2K1|MAPK1|MAPK3|NRG1|NRTN|PDGFRA|PEBP1|PSMB1|PSMC4|RAF1|RBX1|TEK|UBB|UBC	255/43622 genes: 0,58%
Signalling to RAS	REACT:R-HSA-167044	1.29e-15	1.95e-12	21	CALM1|CALM2|FGFR3|GRB2|IL2|IRS2|KIT|MAP2K1|MAPK1|MAPK3|NRG1|NRTN|PDGFRA|PEBP1|PSMB1|PSMC4|RAF1|RBX1|TEK|UBB|UBC	256/43622 genes: 0,59%
Signalling to ERKs	REACT:R-HSA-187687	2.21e-15	3.36e-12	21	CALM1|CALM2|FGFR3|GRB2|IL2|IRS2|KIT|MAP2K1|MAPK1|MAPK3|NRG1|NRTN|PDGFRA|PEBP1|PSMB1|PSMC4|RAF1|RBX1|TEK|UBB|UBC	263/43622 genes: 0,60%
Cocaine addiction	KEGG:hsa05030	2.47e-15	3.75e-12	12	BDNF|CDK5R1|CREB1|DRD2|JUN|NFKB1|PDYN|PRKACA|RELA|SLC18A2|SLC6A3|TH	49/43622 genes: 0,11%
Cell cycle	KEGG:hsa04110	2.63e-15	3.99e-12	16	CCND1|CCND2|CDC25C|CDK2|CDKN1A|CDKN2A|E2F1|GADD45A|GSK3B|MDM2|MYC|PCNA|RB1|RBX1|TGFB1|TP53	124/43622 genes: 0,28%
T cell receptor signaling pathway	KEGG:hsa04660	3.09e-15	4.69e-12	15	AKT1|FOS|GRB2|GSK3B|IFNG|IL2|JUN|MAP2K1|MAPK1|MAPK3|NFKB1|NFKBIA|RAF1|RELA|TNF	103/43622 genes: 0,24%
Oxidative Stress Induced Senescence	REACT:R-HSA-2559580	3.41e-15	5.16e-12	16	AGO3|CDKN2A|E2F1|FOS|H2AC20|H2AC6|H2BC9|JUN|MAP2K6|MAPK1|MAPK3|MDM2|MDM4|TP53|UBB|UBC	126/43622 genes: 0,29%
Cytokine-cytokine receptor interaction	KEGG:hsa04060	3.74e-15	5.68e-12	21	BMP2|CCL19|CCL2|CCL21|CRLF2|CXCL10|CXCL8|FAS|FASLG|IFNG|IL1B|IL2|INHBA|KDR|KIT|LIFR|PDGFRA|PRL|TGFB1|TNF|VEGFA	270/43622 genes: 0,62%
Oxytocin signaling pathway	KEGG:hsa04921	4.02e-15	6.1e-12	17	ACTG1|CALM1|CALM2|CCND1|CDKN1A|ELK1|FOS|ITPR1|JUN|MAP2K1|MAPK1|MAPK3|MEF2C|PRKACA|PTGS2|RAF1|ROCK1	152/43622 genes: 0,35%
TP53 Regulates Metabolic Genes	REACT:R-HSA-5628897	4.4e-15	6.67e-12	14	AGO3|AKT1|COX5A|COX6A1|COX6B1|COX7A2L|CYCS|DDIT4|GSR|MTOR|PRDX1|PRDX2|TP53|TXNRD1	85/43622 genes: 0,19%
ErbB signaling pathway	KEGG:hsa04012	5.22e-15	7.91e-12	14	AKT1|BAD|CDKN1A|ELK1|GRB2|GSK3B|JUN|MAP2K1|MAPK1|MAPK3|MTOR|MYC|NRG1|RAF1	86/43622 genes: 0,20%
Th17 cell differentiation	KEGG:hsa04659	5.55e-15	8.42e-12	15	FOS|HSP90AA1|HSP90AB1|IFNG|IL1B|IL2|JUN|MAPK1|MAPK3|MTOR|NFKB1|NFKBIA|RELA|STAT3|TGFB1	107/43622 genes: 0,25%
Dopaminergic synapse	KEGG:hsa04728	5.64e-15	8.55e-12	16	AKT1|CALM1|CALM2|CREB1|DRD2|DRD4|DRD5|FOS|GNG5|GNGT2|GSK3B|ITPR1|PRKACA|SLC18A2|SLC6A3|TH	130/43622 genes: 0,30%
Herpes simplex infection	KEGG:hsa05168	7.35e-15	1.11e-11	18	CASP3|CASP8|CCL2|CDK2|CYCS|FAS|FASLG|FOS|HNRNPK|IFNG|IL1B|JUN|NFKB1|NFKBIA|RELA|TNF|TP53|TRAF6	185/43622 genes: 0,42%
Rheumatoid arthritis	KEGG:hsa05323	8.6e-15	1.3e-11	14	ATP6V0B|ATP6V0C|ATP6V1C1|CCL2|CTSL|CXCL8|FOS|IFNG|IL1B|JUN|TEK|TGFB1|TNF|VEGFA	89/43622 genes: 0,20%
Cholinergic synapse	KEGG:hsa04725	1.12e-14	1.69e-11	15	ACHE|AKT1|BCL2|CHRM2|CREB1|FOS|GNG5|GNGT2|ITPR1|KCNQ2|MAP2K1|MAPK1|MAPK3|PRKACA|SLC5A7	112/43622 genes: 0,26%
Signaling by NOTCH	REACT:R-HSA-157118	1.12e-14	1.69e-11	15	AGO3|CCND1|CREB1|DLL1|E2F1|HDAC3|HDAC6|HEY2|HEYL|JUN|MYC|RBX1|TP53|UBB|UBC	112/43622 genes: 0,26%
Carbon metabolism	KEGG:hsa01200	1.46e-14	2.22e-11	15	ACADS|ACO2|ALDOC|CAT|DLST|ENO1|ENO2|GOT1|GPT|HK1|IDH3A|MTHFR|PDHA1|SDHB|TPI1	114/43622 genes: 0,26%
Insulin signaling pathway	KEGG:hsa04910	1.47e-14	2.23e-11	16	AKT1|BAD|CALM1|CALM2|ELK1|GRB2|GSK3B|HK1|IRS2|MAP2K1|MAPK1|MAPK3|MTOR|PRKACA|PRKCZ|RAF1	138/43622 genes: 0,32%
Transmembrane transport of small molecules	REACT:R-HSA-382551	1.82e-14	2.75e-11	30	ALB|ATP6V0B|ATP6V0C|ATP6V1C1|ATP8A2|CALM1|CALM2|CLCA1|FXYD6|GABRA6|GNG5|GNGT2|HK1|HMOX1|PRKACA|PSMB1|PSMC4|RAF1|SLC17A8|SLC18A2|SLC22A2|SLC40A1|SLC5A5|SLC5A7|SLC6A2|SLC6A3|SLC8A1|TRPM3|UBB|UBC	676/43622 genes: 1,55%
Sphingolipid signaling pathway	KEGG:hsa04071	2.47e-14	3.74e-11	15	ADORA1|AKT1|BAX|BCL2|BID|MAP2K1|MAPK1|MAPK3|NFKB1|PRKCZ|RAF1|RELA|ROCK1|TNF|TP53	118/43622 genes: 0,27%
Deubiquitination	REACT:R-HSA-5688426	3.22e-14	4.88e-11	21	AR|BECN1|H2AC20|H2AC6|H2BC9|MDM2|MDM4|MYC|NFKBIA|PRKN|PSMB1|PSMC4|RIPK1|TGFB1|TNFAIP3|TP53|TRAF6|UBB|UBC|UCHL1|UCHL5	301/43622 genes: 0,69%
C-type lectin receptors (CLRs)	REACT:R-HSA-5621481	3.24e-14	4.9e-11	16	CALM1|CALM2|CASP8|IL1B|ITPR1|MUC6|NFKB1|NFKBIA|PRKACA|PSMB1|PSMC4|RAF1|RELA|TRAF6|UBB|UBC	145/43622 genes: 0,33%
Oncogene Induced Senescence	REACT:R-HSA-2559585	3.46e-14	5.25e-11	10	AGO3|CDKN2A|E2F1|MAPK1|MAPK3|MDM2|MDM4|TP53|UBB|UBC	32/43622 genes: 0,07%
BH3-only proteins associate with and inactivate anti-apoptotic BCL-2 members	REACT:R-HSA-111453	5.26e-14	7.97e-11	7	BAD|BBC3|BCL2|BCL2L1|BCL2L11|BID|PMAIP1	9/43622 genes: 0,02%
Infectious disease	REACT:R-HSA-5663205	6.01e-14	9.11e-11	23	CALM1|CALM2|GRB2|HSP90AA1|HSP90AB1|MAP2K1|MAP2K6|POLR2K|PSMB1|PSMC4|RBX1|RPL12|RPL19|RPL41|RPL8|RPL9|RPS12|RPS15|RPS27|TGFB1|TXNRD1|UBB|UBC	388/43622 genes: 0,89%
Transcriptional misregulation in cancer	KEGG:hsa05202	6.22e-14	9.42e-11	17	ARNT2|BCL2A1|BCL2L1|CCND2|CDKN1A|CXCL8|DDX5|HMGA2|IGF1|ITGAM|MDM2|MEF2C|MYC|NFKB1|PAX5|RELA|TP53	179/43622 genes: 0,41%
Post-translational protein modification	REACT:R-HSA-597592	6.7e-14	1.02e-10	36	AR|ARF3|BECN1|CALM1|CALM2|CDKN2A|COPE|EEF1A1|H2AC20|H2AC6|H2BC9|HNRNPK|HSPA8|MDM2|MDM4|MUC6|MYC|NFKBIA|PCNA|PIGC|PLAUR|PRKN|PSMB1|PSMC4|RIPK1|RTN4RL2|SUMO1|TGFB1|TNFAIP3|TP53|TRAF6|UBA1|UBB|UBC|UCHL1|UCHL5	1037/43622 genes: 2,38%
Salmonella infection	KEGG:hsa05132	1.35e-13	2.04e-10	13	ACTG1|CASP1|CXCL8|FOS|IFNG|IL1B|JUN|MAPK1|MAPK3|NFKB1|NOS2|RELA|ROCK1	86/43622 genes: 0,20%
Constitutive Signaling by AKT1 E17K in Cancer	REACT:R-HSA-5674400	1.53e-13	2.32e-10	9	AKT1|BAD|CASP9|CDKN1A|CREB1|GSK3B|MDM2|MTOR|NR4A1	25/43622 genes: 0,06%
cGMP-PKG signaling pathway	KEGG:hsa04022	2.05e-13	3.11e-10	16	ADORA1|AKT1|BAD|CALM1|CALM2|CREB1|IRS2|ITPR1|KCNMA1|MAP2K1|MAPK1|MAPK3|MEF2C|RAF1|ROCK1|SLC8A1	163/43622 genes: 0,37%
Longevity regulating pathway	KEGG:hsa04211	2.13e-13	3.23e-10	13	AKT1|BAX|CAT|CREB1|IGF1|IRS2|MTOR|NFKB1|PRKACA|RELA|SIRT1|SOD2|TP53	89/43622 genes: 0,20%
B cell receptor signaling pathway	KEGG:hsa04662	2.47e-13	3.74e-10	12	AKT1|FOS|GRB2|GSK3B|JUN|MAP2K1|MAPK1|MAPK3|NFKB1|NFKBIA|RAF1|RELA	70/43622 genes: 0,16%
GnRH signaling pathway	KEGG:hsa04912	3.32e-13	5.03e-10	13	CALM1|CALM2|ELK1|GRB2|ITPR1|JUN|MAP2K1|MAP2K6|MAPK1|MAPK3|PRKACA|PTK2B|RAF1	92/43622 genes: 0,21%
Choline metabolism in cancer	KEGG:hsa05231	8.76e-13	1.33e-09	13	AKT1|DGKI|FOS|GRB2|JUN|MAP2K1|MAPK1|MAPK3|MTOR|PDGFRA|RAF1|SLC22A2|SLC5A7	99/43622 genes: 0,23%
Neutrophil degranulation	REACT:R-HSA-6798695	9.47e-13	1.44e-09	24	ALDOC|ANXA2|APAF1|ATP6V0C|CAMP|CAT|CEP290|EEF1A1|GM2A|GSTP1|HSP90AA1|HSP90AB1|HSPA1B|HSPA8|ITGAM|MAPK1|NFKB1|PLAUR|PSAP|PSEN1|PSMB1|ROCK1|S100A8|S100A9	488/43622 genes: 1,12%
mTOR signaling pathway	KEGG:hsa04150	9.8e-13	1.49e-09	15	AKT1|ATP6V1C1|DDIT4|GRB2|GSK3B|IGF1|MAP2K1|MAPK1|MAPK3|MTOR|RAF1|RPS6KA2|TNF|WNT1|WNT5A	151/43622 genes: 0,35%
CLEC7A (Dectin-1) signaling	REACT:R-HSA-5607764	1.14e-12	1.73e-09	13	CALM1|CALM2|CASP8|IL1B|ITPR1|NFKB1|NFKBIA|PSMB1|PSMC4|RELA|TRAF6|UBB|UBC	101/43622 genes: 0,23%
Mitotic G2-G2/M phases	REACT:R-HSA-453274	1.35e-12	2.04e-09	16	CDC25C|CDK2|CDK5RAP2|CDKN1A|CEP290|E2F1|HSP90AA1|HSP90AB1|PRKACA|PSMB1|PSMC4|RBX1|TP53|TUBA1A|UBB|UBC	184/43622 genes: 0,42%
Activation of BH3-only proteins	REACT:R-HSA-114452	1.45e-12	2.2e-09	9	AKT1|BAD|BBC3|BCL2|BCL2L11|BID|E2F1|PMAIP1|TP53	31/43622 genes: 0,07%
Longevity regulating pathway - multiple species	KEGG:hsa04213	1.67e-12	2.53e-09	11	AKT1|CAT|HSPA1B|HSPA8|IGF1|IRS2|MTOR|PRKACA|SIRT1|SOD1|SOD2	62/43622 genes: 0,14%
TGF-beta signaling pathway	KEGG:hsa04350	2.38e-12	3.61e-09	12	BMP2|BMP4|IFNG|INHBA|MAPK1|MAPK3|MYC|NOG|RBX1|ROCK1|TGFB1|TNF	84/43622 genes: 0,19%
Renal cell carcinoma	KEGG:hsa05211	2.88e-12	4.36e-09	11	AKT1|ARNT2|GRB2|JUN|MAP2K1|MAPK1|MAPK3|RAF1|RBX1|TGFB1|VEGFA	65/43622 genes: 0,15%
Amphetamine addiction	KEGG:hsa05031	4.83e-12	7.32e-09	11	CALM1|CALM2|CREB1|FOS|JUN|PDYN|PRKACA|SIRT1|SLC18A2|SLC6A3|TH	68/43622 genes: 0,16%
Deregulated CDK5 triggers multiple neurodegenerative pathways in Alzheimer's disease models	REACT:R-HSA-8862803	4.94e-12	7.48e-09	8	BCL2L11|CDC25C|CDK5R1|FASLG|JUN|PRDX1|PRDX2|SOD2	23/43622 genes: 0,05%
Neurodegenerative Diseases	REACT:R-HSA-8863678	4.94e-12	7.48e-09	8	BCL2L11|CDC25C|CDK5R1|FASLG|JUN|PRDX1|PRDX2|SOD2	23/43622 genes: 0,05%
Prion diseases	KEGG:hsa05020	4.94e-12	7.49e-09	9	BAX|ELK1|HSPA5|IL1B|MAP2K1|MAPK1|MAPK3|PRKACA|SOD1	35/43622 genes: 0,08%
Regulation of TP53 Degradation	REACT:R-HSA-6804757	4.94e-12	7.49e-09	9	AKT1|CDK2|CDKN2A|MDM2|MDM4|MTOR|TP53|UBB|UBC	35/43622 genes: 0,08%
Regulation of TP53 Expression and Degradation	REACT:R-HSA-6806003	6.55e-12	9.92e-09	9	AKT1|CDK2|CDKN2A|MDM2|MDM4|MTOR|TP53|UBB|UBC	36/43622 genes: 0,08%
Mitotic G1-G1/S phases	REACT:R-HSA-453279	6.9e-12	1.05e-08	14	AKT1|CCND1|CCND2|CDK2|CDKN1A|CDKN2A|E2F1|MYC|PCNA|PSMB1|PSMC4|RB1|UBB|UBC	143/43622 genes: 0,33%
Amoebiasis	KEGG:hsa05146	1.07e-11	1.62e-08	12	CASP3|CXCL8|IFNG|IL1B|ITGAM|LAMC2|NFKB1|NOS2|PRKACA|RELA|TGFB1|TNF	95/43622 genes: 0,22%
Progesterone-mediated oocyte maturation	KEGG:hsa04914	1.21e-11	1.84e-08	12	AKT1|CDC25C|CDK2|HSP90AA1|HSP90AB1|IGF1|MAP2K1|MAPK1|MAPK3|PRKACA|RAF1|RPS6KA2	96/43622 genes: 0,22%
G2/M Transition	REACT:R-HSA-69275	1.48e-11	2.24e-08	15	CDC25C|CDK2|CDK5RAP2|CDKN1A|CEP290|HSP90AA1|HSP90AB1|PRKACA|PSMB1|PSMC4|RBX1|TP53|TUBA1A|UBB|UBC	182/43622 genes: 0,42%
Oocyte meiosis	KEGG:hsa04114	1.64e-11	2.48e-08	13	AR|CALM1|CALM2|CDC25C|CDK2|IGF1|ITPR1|MAP2K1|MAPK1|MAPK3|PRKACA|RBX1|RPS6KA2	124/43622 genes: 0,28%
Signaling by Wnt	REACT:R-HSA-195721	2.17e-11	3.28e-08	19	AGO3|AKT1|CALM1|CALM2|GNG5|GNGT2|GSK3B|H2AC20|H2AC6|H2BC9|ITPR1|MYC|PSMB1|PSMC4|RBX1|UBB|UBC|WNT1|WNT5A	336/43622 genes: 0,77%
Melanogenesis	KEGG:hsa04916	2.24e-11	3.39e-08	12	CALM1|CALM2|CREB1|GSK3B|KIT|MAP2K1|MAPK1|MAPK3|PRKACA|RAF1|WNT1|WNT5A	101/43622 genes: 0,23%
Ub-specific processing proteases	REACT:R-HSA-5689880	2.52e-11	3.81e-08	16	AR|BECN1|H2AC20|H2AC6|H2BC9|MDM2|MDM4|MYC|NFKBIA|PSMB1|PSMC4|RIPK1|TP53|TRAF6|UBB|UBC	223/43622 genes: 0,51%
Activation of caspases through apoptosome-mediated cleavage	REACT:R-HSA-111459	2.59e-11	3.93e-08	5	APAF1|CASP3|CASP7|CASP9|CYCS	5/43622 genes: 0,01%
Cytochrome c-mediated apoptotic response	REACT:R-HSA-111461	2.59e-11	3.93e-08	5	APAF1|CASP3|CASP7|CASP9|CYCS	5/43622 genes: 0,01%
VEGF signaling pathway	KEGG:hsa04370	2.81e-11	4.26e-08	10	AKT1|BAD|CASP9|KDR|MAP2K1|MAPK1|MAPK3|PTGS2|RAF1|VEGFA	59/43622 genes: 0,14%
Glucose metabolism	REACT:R-HSA-70326	3.49e-11	5.3e-08	11	ALDOC|CALM1|CALM2|ENO1|ENO2|GOT1|HK1|PRKACA|TPI1|UBB|UBC	81/43622 genes: 0,19%
Insulin resistance	KEGG:hsa04931	4.46e-11	6.77e-08	12	AKT1|CREB1|GSK3B|IRS2|MTOR|NFKB1|NFKBIA|PRKCZ|RELA|RPS6KA2|STAT3|TNF	107/43622 genes: 0,25%
TP53 Regulates Transcription of Cell Death Genes	REACT:R-HSA-5633008	5.8e-11	8.79e-08	9	APAF1|BAX|BBC3|BID|BNIP3L|CASP1|FAS|PMAIP1|TP53	45/43622 genes: 0,10%
MAPK targets/ Nuclear events mediated by MAP kinases	REACT:R-HSA-450282	7.53e-11	1.14e-07	8	CREB1|ELK1|FOS|JUN|MAPK1|MAPK3|MEF2C|RPS6KA2	31/43622 genes: 0,07%
Inflammatory bowel disease (IBD)	KEGG:hsa05321	7.68e-11	1.16e-07	10	IFNG|IL1B|IL2|JUN|NFKB1|RELA|STAT3|STAT4|TGFB1|TNF	65/43622 genes: 0,15%
Mitophagy - animal	KEGG:hsa04137	7.68e-11	1.16e-07	10	BCL2L1|BECN1|BNIP3|BNIP3L|E2F1|JUN|PRKN|RELA|TP53|UBB	65/43622 genes: 0,15%
GPCR ligand binding	REACT:R-HSA-500792	8e-11	1.21e-07	21	ADORA1|CCL19|CCL21|CHRM2|CXCL10|CXCL8|DRD2|DRD4|DRD5|GNG5|GNGT2|HCRTR1|KISS1|NPS|P2RY4|PDYN|PNOC|PSAP|TSHB|WNT1|WNT5A	454/43622 genes: 1,04%
Gap junction	KEGG:hsa04540	8.79e-11	1.33e-07	11	DRD2|GRB2|ITPR1|MAP2K1|MAPK1|MAPK3|PDGFRA|PRKACA|RAF1|TUBA1A|TUBA1B	88/43622 genes: 0,20%
Nucleotide-binding domain, leucine rich repeat containing receptor (NLR) signaling pathways	REACT:R-HSA-168643	1.08e-10	1.63e-07	9	BCL2|BCL2L1|CASP1|CASP8|CASP9|HSP90AB1|MAP2K6|TNFAIP3|TRAF6	48/43622 genes: 0,11%
Phospholipase D signaling pathway	KEGG:hsa04072	1.19e-10	1.81e-07	13	AKT1|CXCL8|DGKI|DNM2|GRB2|KIT|MAP2K1|MAPK1|MAPK3|MTOR|PDGFRA|PTK2B|RAF1	145/43622 genes: 0,33%
Th1 and Th2 cell differentiation	KEGG:hsa04658	1.44e-10	2.18e-07	11	DLL1|FOS|IFNG|IL2|JUN|MAPK1|MAPK3|NFKB1|NFKBIA|RELA|STAT4	92/43622 genes: 0,21%
G1/S Transition	REACT:R-HSA-69206	1.57e-10	2.39e-07	12	AKT1|CCND1|CDK2|CDKN1A|E2F1|MYC|PCNA|PSMB1|PSMC4|RB1|UBB|UBC	119/43622 genes: 0,27%
RIG-I-like receptor signaling pathway	KEGG:hsa04622	1.65e-10	2.5e-07	10	ATG12|CASP8|CXCL10|CXCL8|NFKB1|NFKBIA|RELA|RIPK1|TNF|TRAF6	70/43622 genes: 0,16%
Cyclin E associated events during G1/S transition	REACT:R-HSA-69202	2.2e-10	3.33e-07	10	AKT1|CCND1|CDK2|CDKN1A|MYC|PSMB1|PSMC4|RB1|UBB|UBC	72/43622 genes: 0,17%
Hippo signaling pathway	KEGG:hsa04390	2.54e-10	3.85e-07	13	ACTG1|BBC3|BMP2|BMP4|CCND1|CCND2|GSK3B|MYC|PRKCZ|SERPINE1|TGFB1|WNT1|WNT5A	154/43622 genes: 0,35%
p75 NTR receptor-mediated signalling	REACT:R-HSA-193704	2.57e-10	3.9e-07	11	BAD|BCL2L11|CASP3|HDAC3|NFKB1|NFKBIA|RELA|RTN4|TRAF6|UBB|UBC	97/43622 genes: 0,22%
Thyroid hormone synthesis	KEGG:hsa04918	2.9e-10	4.4e-07	10	ALB|CREB1|GPX1|GSR|HSPA5|ITPR1|PRKACA|SLC5A5|TPO|TSHB	74/43622 genes: 0,17%
AKT phosphorylates targets in the cytosol	REACT:R-HSA-198323	3.22e-10	4.88e-07	6	AKT1|BAD|CASP9|CDKN1A|GSK3B|MDM2	13/43622 genes: 0,03%
HSF1-dependent transactivation	REACT:R-HSA-3371571	3.26e-10	4.95e-07	7	FKBP4|HSF1|HSP90AA1|HSP90AB1|HSPA1B|HSPA8|MTOR	23/43622 genes: 0,05%
Natural killer cell mediated cytotoxicity	KEGG:hsa04650	5.3e-10	8.03e-07	12	BID|CASP3|FAS|FASLG|GRB2|IFNG|MAP2K1|MAPK1|MAPK3|PTK2B|RAF1|TNF	132/43622 genes: 0,30%
Platelet degranulation	REACT:R-HSA-114608	5.3e-10	8.03e-07	12	ALB|CALM1|CALM2|CLU|HSPA5|IGF1|PCDH7|PSAP|SERPINE1|SOD1|TGFB1|VEGFA	132/43622 genes: 0,30%
Apoptotic factor-mediated response	REACT:R-HSA-111471	5.38e-10	8.15e-07	5	APAF1|CASP3|CASP7|CASP9|CYCS	7/43622 genes: 0,02%
Cyclin D associated events in G1	REACT:R-HSA-69231	5.57e-10	8.44e-07	8	CCND1|CCND2|CDKN1A|CDKN2A|E2F1|RB1|UBB|UBC	39/43622 genes: 0,09%
G1 Phase	REACT:R-HSA-69236	5.57e-10	8.44e-07	8	CCND1|CCND2|CDKN1A|CDKN2A|E2F1|RB1|UBB|UBC	39/43622 genes: 0,09%
NF-kB is activated and signals survival	REACT:R-HSA-209560	5.59e-10	8.48e-07	6	NFKB1|NFKBIA|RELA|TRAF6|UBB|UBC	14/43622 genes: 0,03%
Constitutive Signaling by NOTCH1 HD+PEST Domain Mutants	REACT:R-HSA-2894862	6.39e-10	9.68e-07	9	DLL1|HDAC3|HDAC6|HEY2|HEYL|MYC|RBX1|UBB|UBC	58/43622 genes: 0,13%
Constitutive Signaling by NOTCH1 PEST Domain Mutants	REACT:R-HSA-2644606	6.39e-10	9.68e-07	9	DLL1|HDAC3|HDAC6|HEY2|HEYL|MYC|RBX1|UBB|UBC	58/43622 genes: 0,13%
Signaling by NOTCH1 HD+PEST Domain Mutants in Cancer	REACT:R-HSA-2894858	6.39e-10	9.68e-07	9	DLL1|HDAC3|HDAC6|HEY2|HEYL|MYC|RBX1|UBB|UBC	58/43622 genes: 0,13%
Signaling by NOTCH1 in Cancer	REACT:R-HSA-2644603	6.39e-10	9.68e-07	9	DLL1|HDAC3|HDAC6|HEY2|HEYL|MYC|RBX1|UBB|UBC	58/43622 genes: 0,13%
Signaling by NOTCH1 PEST Domain Mutants in Cancer	REACT:R-HSA-2644602	6.39e-10	9.68e-07	9	DLL1|HDAC3|HDAC6|HEY2|HEYL|MYC|RBX1|UBB|UBC	58/43622 genes: 0,13%
Class A/1 (Rhodopsin-like receptors)	REACT:R-HSA-373076	7.14e-10	1.08e-06	17	ADORA1|CCL19|CCL21|CHRM2|CXCL10|CXCL8|DRD2|DRD4|DRD5|HCRTR1|KISS1|NPS|P2RY4|PDYN|PNOC|PSAP|TSHB	322/43622 genes: 0,74%
Response to elevated platelet cytosolic Ca2+	REACT:R-HSA-76005	8.15e-10	1.24e-06	12	ALB|CALM1|CALM2|CLU|HSPA5|IGF1|PCDH7|PSAP|SERPINE1|SOD1|TGFB1|VEGFA	137/43622 genes: 0,31%
Attenuation phase	REACT:R-HSA-3371568	9.26e-10	1.4e-06	6	FKBP4|HSF1|HSP90AA1|HSP90AB1|HSPA1B|HSPA8	15/43622 genes: 0,03%
Opioid Signalling	REACT:R-HSA-111885	1.04e-09	1.58e-06	10	CALM1|CALM2|CREB1|GNG5|GNGT2|ITPR1|MAPK1|PDE1B|PDYN|PRKACA	84/43622 genes: 0,19%
RIG-I/MDA5 mediated induction of IFN-alpha/beta pathways	REACT:R-HSA-168928	1.04e-09	1.58e-06	10	ATG12|CASP8|NFKB1|NFKBIA|RELA|RIPK1|TNFAIP3|TRAF6|UBB|UBC	84/43622 genes: 0,19%
Serotonergic synapse	KEGG:hsa04726	1.22e-09	1.86e-06	11	CASP3|GNG5|GNGT2|ITPR1|MAP2K1|MAPK1|MAPK3|PRKACA|PTGS2|RAF1|SLC18A2	112/43622 genes: 0,26%
Wnt signaling pathway	KEGG:hsa04310	1.34e-09	2.03e-06	12	CACYBP|CCND1|CCND2|GSK3B|JUN|MYC|PRKACA|PSEN1|RBX1|TP53|WNT1|WNT5A	143/43622 genes: 0,33%
Cytosolic DNA-sensing pathway	KEGG:hsa04623	1.37e-09	2.08e-06	9	CASP1|CXCL10|IL1B|NFKB1|NFKBIA|POLR1C|POLR2K|RELA|RIPK1	63/43622 genes: 0,14%
RHO GTPase Effectors	REACT:R-HSA-195258	1.47e-09	2.23e-06	16	ACTG1|AR|CALM1|CALM2|CDC25C|GRB2|H2AC20|H2AC6|H2BC9|LIMK2|MAPK1|MAPK3|NCF1|NOX1|ROCK1|RPS27	294/43622 genes: 0,67%
p53-Dependent G1 DNA Damage Response	REACT:R-HSA-69563	1.83e-09	2.77e-06	9	CDK2|CDKN1A|MDM2|MDM4|PSMB1|PSMC4|TP53|UBB|UBC	65/43622 genes: 0,15%
p53-Dependent G1/S DNA damage checkpoint	REACT:R-HSA-69580	1.83e-09	2.77e-06	9	CDK2|CDKN1A|MDM2|MDM4|PSMB1|PSMC4|TP53|UBB|UBC	65/43622 genes: 0,15%
Renin secretion	KEGG:hsa04924	1.83e-09	2.77e-06	9	ADORA1|CALM1|CALM2|CLCA1|CREB1|ITPR1|KCNMA1|PDE1B|PRKACA	65/43622 genes: 0,15%
Calcium signaling pathway	KEGG:hsa04020	1.86e-09	2.83e-06	13	CACNA1E|CALM1|CALM2|CHRM2|DRD5|ITPR1|NOS2|PDE1B|PDGFRA|PLCE1|PRKACA|PTK2B|SLC8A1	181/43622 genes: 0,41%
Beta-catenin independent WNT signaling	REACT:R-HSA-3858494	2.14e-09	3.25e-06	12	AGO3|CALM1|CALM2|GNG5|GNGT2|ITPR1|PSMB1|PSMC4|UBB|UBC|WNT1|WNT5A	149/43622 genes: 0,34%
Type II diabetes mellitus	KEGG:hsa04930	2.25e-09	3.42e-06	8	CACNA1E|HK1|IRS2|MAPK1|MAPK3|MTOR|PRKCZ|TNF	46/43622 genes: 0,11%
p75NTR signals via NF-kB	REACT:R-HSA-193639	2.26e-09	3.43e-06	6	NFKB1|NFKBIA|RELA|TRAF6|UBB|UBC	17/43622 genes: 0,04%
G1/S DNA Damage Checkpoints	REACT:R-HSA-69615	2.41e-09	3.66e-06	9	CDK2|CDKN1A|MDM2|MDM4|PSMB1|PSMC4|TP53|UBB|UBC	67/43622 genes: 0,15%
Long-term potentiation	KEGG:hsa04720	2.41e-09	3.66e-06	9	CALM1|CALM2|ITPR1|MAP2K1|MAPK1|MAPK3|PRKACA|RAF1|RPS6KA2	67/43622 genes: 0,15%
Epithelial cell signaling in Helicobacter pylori infection	KEGG:hsa05120	2.76e-09	4.19e-06	9	ATP6V0B|ATP6V0C|ATP6V1C1|CASP3|CXCL8|JUN|NFKB1|NFKBIA|RELA	68/43622 genes: 0,16%
NOTCH1 Intracellular Domain Regulates Transcription	REACT:R-HSA-2122947	3.21e-09	4.87e-06	8	HDAC3|HDAC6|HEY2|HEYL|MYC|RBX1|UBB|UBC	48/43622 genes: 0,11%
Uptake and actions of bacterial toxins	REACT:R-HSA-5339562	3.32e-09	5.04e-06	7	CALM1|CALM2|HSP90AA1|HSP90AB1|MAP2K1|MAP2K6|TXNRD1	31/43622 genes: 0,07%
Apoptotic machinery	KEGG:hsa_M00685	3.42e-09	5.18e-06	4	APAF1|CASP3|CASP7|CASP9	4/43622 genes: 0,01%
Regulation of HSF1-mediated heat shock response	REACT:R-HSA-3371453	3.6e-09	5.45e-06	9	DNAJB6|GSK3B|HSF1|HSPA1B|HSPA5|HSPA8|MAPK1|MAPK3|SIRT1	70/43622 genes: 0,16%
Interleukin-10 signaling	REACT:R-HSA-6783783	3.82e-09	5.79e-06	8	CCL19|CCL2|CXCL10|CXCL8|IL1B|PTGS2|STAT3|TNF	49/43622 genes: 0,11%
TP53 Regulates Transcription of Cell Cycle Genes	REACT:R-HSA-6791312	3.82e-09	5.79e-06	8	BAX|CDC25C|CDK2|CDKN1A|E2F1|GADD45A|PCNA|TP53	49/43622 genes: 0,11%
Circadian entrainment	KEGG:hsa04713	3.92e-09	5.95e-06	10	CALM1|CALM2|CREB1|FOS|GNG5|GNGT2|ITPR1|MAPK1|MAPK3|PRKACA	96/43622 genes: 0,22%
Cyclin A:Cdk2-associated events at S phase entry	REACT:R-HSA-69656	4.09e-09	6.2e-06	9	CCND1|CDK2|CDKN1A|MYC|PSMB1|PSMC4|RB1|UBB|UBC	71/43622 genes: 0,16%
Eukaryotic Translation Elongation	REACT:R-HSA-156842	4.35e-09	6.59e-06	10	EEF1A1|EEF1G|RPL12|RPL19|RPL41|RPL8|RPL9|RPS12|RPS15|RPS27	97/43622 genes: 0,22%
Death Receptor Signalling	REACT:R-HSA-73887	4.51e-09	6.84e-06	8	CASP8|FAS|FASLG|RIPK1|TNF|TNFAIP3|UBB|UBC	50/43622 genes: 0,11%
Signaling by NOTCH1	REACT:R-HSA-1980143	5.26e-09	7.98e-06	9	DLL1|HDAC3|HDAC6|HEY2|HEYL|MYC|RBX1|UBB|UBC	73/43622 genes: 0,17%
Regulation of TP53 Activity	REACT:R-HSA-5633007	5.55e-09	8.42e-06	12	AKT1|CDK2|CDK5R1|CDKN2A|MAP2K6|MBD3|MDM2|MDM4|MTOR|TP53|UBB|UBC	162/43622 genes: 0,37%
Oxidative phosphorylation	KEGG:hsa00190	7.63e-09	1.16e-05	11	ATP6V0B|ATP6V0C|ATP6V1C1|COX5A|COX6A1|COX6B1|COX7A2|COX7A2L|CYC1|SDHB|UQCRC1	133/43622 genes: 0,30%
Antigen processing and presentation	KEGG:hsa04612	8.51e-09	1.29e-05	9	CREB1|CTSL|HSP90AA1|HSP90AB1|HSPA1B|HSPA5|HSPA8|IFNG|TNF	77/43622 genes: 0,18%
Glutathione metabolism	KEGG:hsa00480	8.52e-09	1.29e-05	8	GCLC|GPX1|GPX4|GSR|GSTA3|GSTA4|GSTP1|ODC1	54/43622 genes: 0,12%
The citric acid (TCA) cycle and respiratory electron transport	REACT:R-HSA-1428517	9.57e-09	1.45e-05	12	ACO2|COX5A|COX6A1|COX6B1|COX7A2L|CYC1|CYCS|DLST|IDH3A|PDHA1|SDHB|UQCRC1	170/43622 genes: 0,39%
TP53 Regulates Transcription of Genes Involved in Cytochrome C Release	REACT:R-HSA-6803204	9.66e-09	1.46e-05	6	BAX|BBC3|BID|BNIP3L|PMAIP1|TP53	21/43622 genes: 0,05%
Ion channel transport	REACT:R-HSA-983712	1.06e-08	1.61e-05	13	ATP6V0B|ATP6V0C|ATP6V1C1|ATP8A2|CALM1|CALM2|CLCA1|FXYD6|GABRA6|RAF1|TRPM3|UBB|UBC	209/43622 genes: 0,48%
Post NMDA receptor activation events	REACT:R-HSA-438064	1.25e-08	1.9e-05	7	CALM1|CALM2|CREB1|MAPK1|PRKACA|RAF1|RPS6KA2	37/43622 genes: 0,08%
Viral myocarditis	KEGG:hsa05416	1.53e-08	2.32e-05	8	ACTG1|BID|CASP3|CASP8|CASP9|CCND1|CYCS|EIF4G2	58/43622 genes: 0,13%
HSF1 activation	REACT:R-HSA-3371511	1.96e-08	2.98e-05	5	EEF1A1|HDAC6|HSF1|HSP90AA1|HSP90AB1	12/43622 genes: 0,03%
Neurotransmitter Receptor Binding And Downstream Transmission In The Postsynaptic Cell	REACT:R-HSA-112314	2.02e-08	3.07e-05	11	CALM1|CALM2|CREB1|GABRA6|GNG5|GNGT2|MAPK1|MDM2|PRKACA|RAF1|RPS6KA2	146/43622 genes: 0,33%
Negative regulation of MAPK pathway	REACT:R-HSA-5675221	2.22e-08	3.36e-05	7	MAP2K1|MAPK1|MAPK3|PEBP1|RAF1|UBB|UBC	40/43622 genes: 0,09%
The role of GTSE1 in G2/M progression after G2 checkpoint	REACT:R-HSA-8852276	2.3e-08	3.49e-05	8	CDKN1A|HSP90AA1|HSP90AB1|PSMB1|PSMC4|TP53|UBB|UBC	61/43622 genes: 0,14%
PI5P, PP2A and IER3 Regulate PI3K/AKT Signaling	REACT:R-HSA-6811558	2.53e-08	3.84e-05	9	AKT1|FGFR3|GRB2|IRS2|KIT|MAPK1|MAPK3|NRG1|PDGFRA	87/43622 genes: 0,20%
Activation of NMDA receptor upon glutamate binding and postsynaptic events	REACT:R-HSA-442755	2.66e-08	4.03e-05	7	CALM1|CALM2|CREB1|MAPK1|PRKACA|RAF1|RPS6KA2	41/43622 genes: 0,09%
Metabolism of lipids and lipoproteins	REACT:R-HSA-556833	2.7e-08	4.1e-05	24	ACADS|ACHE|ALB|AMN|ARF3|ARNT2|CDIPT|CROT|CYP1A1|CYP1A2|DBI|GM2A|GPX1|GPX4|HDAC3|HSD11B2|MBOAT2|PGS1|PRKACA|PSAP|PTGES|PTGS2|TECR|TXNRD1	814/43622 genes: 1,87%
Synaptic vesicle cycle	KEGG:hsa04721	2.99e-08	4.53e-05	8	ATP6V0B|ATP6V0C|ATP6V1C1|CPLX1|DNM2|SLC17A8|SLC18A2|UNC13C	63/43622 genes: 0,14%
Nuclear Events (kinase and transcription factor activation)	REACT:R-HSA-198725	3.07e-08	4.66e-05	6	CREB1|ELK1|MAPK1|MAPK3|MEF2C|RPS6KA2	25/43622 genes: 0,06%
Cell cycle - G1/S transition	KEGG:hsa_M00692	3.17e-08	4.81e-05	5	CCND1|CCND2|CDK2|E2F1|RB1	13/43622 genes: 0,03%
Vascular smooth muscle contraction	KEGG:hsa04270	3.72e-08	5.63e-05	10	CALM1|CALM2|ITPR1|KCNMA1|MAP2K1|MAPK1|MAPK3|PRKACA|RAF1|ROCK1	121/43622 genes: 0,28%
Platelet homeostasis	REACT:R-HSA-418346	3.76e-08	5.71e-05	9	CALM1|CALM2|GNG5|GNGT2|ITPR1|KCNMA1|NOS2|PDE1B|SLC8A1	91/43622 genes: 0,21%
Shigellosis	KEGG:hsa05131	3.84e-08	5.82e-05	8	ACTG1|CXCL8|MAPK1|MAPK3|NFKB1|NFKBIA|RELA|ROCK1	65/43622 genes: 0,15%
Selenoamino acid metabolism	REACT:R-HSA-2408522	4.02e-08	6.1e-05	10	GSR|RPL12|RPL19|RPL41|RPL8|RPL9|RPS12|RPS15|RPS27|TXNRD1	122/43622 genes: 0,28%
Peptide chain elongation	REACT:R-HSA-156902	4.14e-08	6.28e-05	9	EEF1A1|RPL12|RPL19|RPL41|RPL8|RPL9|RPS12|RPS15|RPS27	92/43622 genes: 0,21%
Influenza Infection	REACT:R-HSA-168254	4.29e-08	6.51e-05	11	HSP90AA1|POLR2K|RPL12|RPL19|RPL41|RPL8|RPL9|RPS12|RPS15|RPS27|TGFB1	157/43622 genes: 0,36%
Fc epsilon RI signaling pathway	KEGG:hsa04664	4.9e-08	7.42e-05	8	AKT1|GRB2|MAP2K1|MAP2K6|MAPK1|MAPK3|RAF1|TNF	67/43622 genes: 0,15%
Signaling by PTK6	REACT:R-HSA-8848021	4.9e-08	7.42e-05	8	AKT1|CCND1|CDK2|LRRK2|NRG1|STAT3|UBB|UBC	67/43622 genes: 0,15%
TCF dependent signaling in response to WNT	REACT:R-HSA-201681	4.93e-08	7.48e-05	13	AKT1|GSK3B|H2AC20|H2AC6|H2BC9|MYC|PSMB1|PSMC4|RBX1|UBB|UBC|WNT1|WNT5A	238/43622 genes: 0,55%
Negative regulation of the PI3K/AKT network	REACT:R-HSA-199418	5.01e-08	7.59e-05	9	AKT1|FGFR3|GRB2|IRS2|KIT|MAPK1|MAPK3|NRG1|PDGFRA	94/43622 genes: 0,22%
CLEC7A/inflammasome pathway	REACT:R-HSA-5660668	5.06e-08	7.68e-05	4	CASP8|IL1B|NFKB1|RELA	6/43622 genes: 0,01%
Negative feedback regulation of MAPK pathway	REACT:R-HSA-5674499	5.06e-08	7.68e-05	4	MAP2K1|MAPK1|MAPK3|RAF1	6/43622 genes: 0,01%
Cytosolic sensors of pathogen-associated DNA	REACT:R-HSA-1834949	5.51e-08	8.36e-05	8	NFKB1|NFKBIA|POLR1C|POLR2K|RELA|RIPK1|UBB|UBC	68/43622 genes: 0,16%
Interleukin-1 signaling	REACT:R-HSA-446652	6.12e-08	9.29e-05	7	IL1B|MAP2K1|MAP2K6|NFKB1|TRAF6|UBB|UBC	46/43622 genes: 0,11%
Cell Cycle Checkpoints	REACT:R-HSA-69620	6.15e-08	9.32e-05	12	CDC25C|CDK2|CDKN1A|H2BC9|MDM2|MDM4|PSMB1|PSMC4|SUMO1|TP53|UBB|UBC	201/43622 genes: 0,46%
Adipocytokine signaling pathway	KEGG:hsa04920	6.19e-08	9.39e-05	8	AKT1|IRS2|MTOR|NFKB1|NFKBIA|RELA|STAT3|TNF	69/43622 genes: 0,16%
G alpha (i) signalling events	REACT:R-HSA-418594	6.29e-08	9.53e-05	13	ADORA1|CCL19|CCL21|CHRM2|CXCL10|CXCL8|DRD2|DRD4|GNG5|GNGT2|P2RY4|PDYN|PNOC	243/43622 genes: 0,56%
Caspase activation via extrinsic apoptotic signalling pathway	REACT:R-HSA-5357769	6.41e-08	9.72e-05	6	CASP3|CASP8|CASP9|FAS|FASLG|RIPK1	28/43622 genes: 0,06%
PLC beta mediated events	REACT:R-HSA-112043	7.15e-08	0.000108	7	CALM1|CALM2|CREB1|ITPR1|MAPK1|PDE1B|PRKACA	47/43622 genes: 0,11%
S Phase	REACT:R-HSA-69242	7.36e-08	0.000112	10	CCND1|CDK2|CDKN1A|MYC|PCNA|PSMB1|PSMC4|RB1|UBB|UBC	130/43622 genes: 0,30%
Protein processing in endoplasmic reticulum	KEGG:hsa04141	7.61e-08	0.000115	11	BAK1|BAX|BCL2|HSP90AA1|HSP90AB1|HSPA1B|HSPA5|HSPA8|NFE2L2|PRKN|RBX1	166/43622 genes: 0,38%
CREB phosphorylation through the activation of Ras	REACT:R-HSA-442742	8.03e-08	0.000122	6	CALM1|CALM2|CREB1|MAPK1|RAF1|RPS6KA2	29/43622 genes: 0,07%
Negative regulation of FGFR3 signaling	REACT:R-HSA-5654732	8.03e-08	0.000122	6	FGFR3|GRB2|MAPK1|MAPK3|UBB|UBC	29/43622 genes: 0,07%
Thyroid cancer	KEGG:hsa05216	8.03e-08	0.000122	6	CCND1|MAP2K1|MAPK1|MAPK3|MYC|TP53	29/43622 genes: 0,07%
G-protein mediated events	REACT:R-HSA-112040	8.32e-08	0.000126	7	CALM1|CALM2|CREB1|ITPR1|MAPK1|PDE1B|PRKACA	48/43622 genes: 0,11%
Amyloid fiber formation	REACT:R-HSA-977225	9.38e-08	0.000142	9	H2AC20|H2AC6|H2BC9|MFGE8|PRKN|PRL|SNCA|UBB|UBC	101/43622 genes: 0,23%
Retrograde endocannabinoid signaling	KEGG:hsa04723	9.38e-08	0.000142	9	GABRA6|GNG5|GNGT2|ITPR1|MAPK1|MAPK3|PRKACA|PTGS2|SLC17A8	101/43622 genes: 0,23%
Extracellular matrix organization	REACT:R-HSA-1474244	9.4e-08	0.000143	14	BMP2|BMP4|CAPN11|CASP3|CTSL|ITGAM|ITGB8|KDR|LAMC2|LRP4|PSEN1|SERPINE1|TGFB1|TNR	297/43622 genes: 0,68%
Ca-dependent events	REACT:R-HSA-111996	9.97e-08	0.000151	6	CALM1|CALM2|CREB1|MAPK1|PDE1B|PRKACA	30/43622 genes: 0,07%
Spry regulation of FGF signaling	REACT:R-HSA-1295596	1.06e-07	0.00016	5	GRB2|MAPK1|MAPK3|UBB|UBC	16/43622 genes: 0,04%
Regulation of actin cytoskeleton	KEGG:hsa04810	1.1e-07	0.000167	12	ACTG1|CHRM2|FGFR3|ITGAM|ITGB8|LIMK2|MAP2K1|MAPK1|MAPK3|PDGFRA|RAF1|ROCK1	212/43622 genes: 0,49%
GPCR downstream signaling	REACT:R-HSA-388396	1.16e-07	0.000175	26	ADORA1|AKT1|CCL19|CCL21|CHRM2|CXCL10|CXCL8|DGKI|DRD2|DRD4|DRD5|GNG5|GNGT2|GPR27|GRB2|HCRTR1|IL2|ITPR1|KISS1|NPS|P2RY4|PDE1B|PDYN|PNOC|ROCK1|TSHB	1016/43622 genes: 2,33%
Interleukin-1 processing	REACT:R-HSA-448706	1.17e-07	0.000178	4	CASP1|IL1B|NFKB1|RELA	7/43622 genes: 0,02%
Biosynthesis of amino acids	KEGG:hsa01230	1.2e-07	0.000182	8	ACO2|ALDOC|ENO1|ENO2|GOT1|GPT|IDH3A|TPI1	75/43622 genes: 0,17%
Influenza Viral RNA Transcription and Replication	REACT:R-HSA-168273	1.21e-07	0.000183	10	HSP90AA1|POLR2K|RPL12|RPL19|RPL41|RPL8|RPL9|RPS12|RPS15|RPS27	137/43622 genes: 0,31%
Axon guidance	KEGG:hsa04360	1.3e-07	0.000197	11	EFNB1|GSK3B|LIMK2|MAPK1|MAPK3|NTN1|PRKCZ|RAF1|ROCK1|SEMA4D|WNT5A	175/43622 genes: 0,40%
UCH proteinases	REACT:R-HSA-5689603	1.31e-07	0.000199	9	H2AC20|H2AC6|PSMB1|PSMC4|TGFB1|UBB|UBC|UCHL1|UCHL5	105/43622 genes: 0,24%
Endocytosis	KEGG:hsa04144	1.38e-07	0.000209	13	ARF3|DNM2|FGFR3|HSPA1B|HSPA8|KDR|KIT|MDM2|PDGFRA|PRKCZ|TGFB1|TRAF6|VPS45	260/43622 genes: 0,60%
Regulation of DNA replication	REACT:R-HSA-69304	1.48e-07	0.000224	8	CDK2|CDKN1A|E2F1|PSMB1|PSMC4|RB1|UBB|UBC	77/43622 genes: 0,18%
Gluconeogenesis	REACT:R-HSA-70263	1.5e-07	0.000228	6	ALDOC|ENO1|ENO2|GOT1|PRKACA|TPI1	32/43622 genes: 0,07%
NOD1/2 Signaling Pathway	REACT:R-HSA-168638	1.5e-07	0.000228	6	CASP1|CASP8|CASP9|MAP2K6|TNFAIP3|TRAF6	32/43622 genes: 0,07%
Cardiac muscle contraction	KEGG:hsa04260	1.64e-07	0.000248	8	COX5A|COX6A1|COX6B1|COX7A2|COX7A2L|CYC1|SLC8A1|UQCRC1	78/43622 genes: 0,18%
DNA Damage/Telomere Stress Induced Senescence	REACT:R-HSA-2559586	1.81e-07	0.000274	8	CDK2|CDKN1A|H2AC20|H2AC6|H2BC9|HMGA2|RB1|TP53	79/43622 genes: 0,18%
DNA Replication	REACT:R-HSA-69306	1.81e-07	0.000275	9	CDK2|CDKN1A|E2F1|PCNA|PSMB1|PSMC4|RB1|UBB|UBC	109/43622 genes: 0,25%
Regulation of TNFR1 signaling	REACT:R-HSA-5357905	1.82e-07	0.000277	6	CASP8|RIPK1|TNF|TNFAIP3|UBB|UBC	33/43622 genes: 0,08%
Amine-derived hormones	REACT:R-HSA-209776	2.05e-07	0.00031	5	DIO1|SLC5A5|TH|TPO|TSHB	18/43622 genes: 0,04%
Influenza Life Cycle	REACT:R-HSA-168255	2.19e-07	0.000333	10	HSP90AA1|POLR2K|RPL12|RPL19|RPL41|RPL8|RPL9|RPS12|RPS15|RPS27	146/43622 genes: 0,33%
DAG and IP3 signaling	REACT:R-HSA-1489509	2.2e-07	0.000334	6	CALM1|CALM2|CREB1|ITPR1|PDE1B|PRKACA	34/43622 genes: 0,08%
MAPK (ERK1/2) signaling	KEGG:hsa_M00687	2.33e-07	0.000354	4	MAP2K1|MAPK1|MAPK3|RAF1	8/43622 genes: 0,02%
Signaling by Rho GTPases	REACT:R-HSA-194315	2.47e-07	0.000374	16	ACTG1|AR|CALM1|CALM2|CDC25C|GRB2|H2AC20|H2AC6|H2BC9|LIMK2|MAPK1|MAPK3|NCF1|NOX1|ROCK1|RPS27	425/43622 genes: 0,97%
Stabilization of p53	REACT:R-HSA-69541	2.48e-07	0.000377	7	MDM2|MDM4|PSMB1|PSMC4|TP53|UBB|UBC	56/43622 genes: 0,13%
TP53 Regulates Transcription of Genes Involved in G2 Cell Cycle Arrest	REACT:R-HSA-6804114	2.76e-07	0.000418	5	BAX|CDC25C|GADD45A|PCNA|TP53	19/43622 genes: 0,04%
EGFR interacts with phospholipase C-gamma	REACT:R-HSA-212718	3.15e-07	0.000477	6	CALM1|CALM2|CREB1|ITPR1|PDE1B|PRKACA	36/43622 genes: 0,08%
PLC-gamma1 signalling	REACT:R-HSA-167021	3.15e-07	0.000477	6	CALM1|CALM2|CREB1|ITPR1|PDE1B|PRKACA	36/43622 genes: 0,08%
FCERI mediated NF-kB activation	REACT:R-HSA-2871837	3.2e-07	0.000486	8	NFKB1|NFKBIA|PSMB1|PSMC4|RELA|TRAF6|UBB|UBC	85/43622 genes: 0,19%
Phagosome	KEGG:hsa04145	3.39e-07	0.000514	10	ACTG1|ATP6V0B|ATP6V0C|ATP6V1C1|CTSL|ITGAM|NCF1|NOX1|TUBA1A|TUBA1B	153/43622 genes: 0,35%
Regulation of TP53 Activity through Methylation	REACT:R-HSA-6804760	3.66e-07	0.000554	5	MDM2|MDM4|TP53|UBB|UBC	20/43622 genes: 0,05%
Ovarian tumor domain proteases	REACT:R-HSA-5689896	3.73e-07	0.000566	6	RIPK1|TNFAIP3|TP53|TRAF6|UBB|UBC	37/43622 genes: 0,08%
SLC-mediated transmembrane transport	REACT:R-HSA-425407	4.09e-07	0.000621	13	ALB|CALM1|CALM2|HK1|SLC17A8|SLC18A2|SLC22A2|SLC40A1|SLC5A5|SLC5A7|SLC6A2|SLC6A3|SLC8A1	286/43622 genes: 0,66%
Nonsense-Mediated Decay (NMD)	REACT:R-HSA-927802	4.13e-07	0.000627	9	RPL12|RPL19|RPL41|RPL8|RPL9|RPS12|RPS15|RPS27|UPF3B	120/43622 genes: 0,28%
Nonsense Mediated Decay (NMD) enhanced by the Exon Junction Complex (EJC)	REACT:R-HSA-975957	4.13e-07	0.000627	9	RPL12|RPL19|RPL41|RPL8|RPL9|RPS12|RPS15|RPS27|UPF3B	120/43622 genes: 0,28%
Formation of apoptosome	REACT:R-HSA-111458	4.49e-07	0.000681	3	APAF1|CASP9|CYCS	3/43622 genes: 0,01%
Ca2+ pathway	REACT:R-HSA-4086398	4.52e-07	0.000686	7	AGO3|CALM1|CALM2|GNG5|GNGT2|ITPR1|WNT5A	61/43622 genes: 0,14%
Degradation of GLI2 by the proteasome	REACT:R-HSA-5610783	4.52e-07	0.000686	7	GSK3B|PRKACA|PSMB1|PSMC4|RBX1|UBB|UBC	61/43622 genes: 0,14%
GLI3 is processed to GLI3R by the proteasome	REACT:R-HSA-5610785	4.52e-07	0.000686	7	GSK3B|PRKACA|PSMB1|PSMC4|RBX1|UBB|UBC	61/43622 genes: 0,14%
SCF(Skp2)-mediated degradation of p27/p21	REACT:R-HSA-187577	4.52e-07	0.000686	7	CCND1|CDK2|CDKN1A|PSMB1|PSMC4|UBB|UBC	61/43622 genes: 0,14%
Signaling by BRAF and RAF fusions	REACT:R-HSA-6802952	4.52e-07	0.000686	7	BCL2L11|MACF1|MAP2K1|MAPK1|MAPK3|PEBP1|RAF1	61/43622 genes: 0,14%
Signaling by FGFR	REACT:R-HSA-190236	4.58e-07	0.000694	8	FGFR3|GRB2|HNRNPM|MAPK1|MAPK3|POLR2K|UBB|UBC	89/43622 genes: 0,20%
Fc gamma R-mediated phagocytosis	KEGG:hsa04666	4.99e-07	0.000757	8	AKT1|DNM2|LIMK2|MAP2K1|MAPK1|MAPK3|NCF1|RAF1	90/43622 genes: 0,21%
MAPK6/MAPK4 signaling	REACT:R-HSA-5687128	4.99e-07	0.000757	8	AGO3|JUN|MYC|PRKACA|PSMB1|PSMC4|UBB|UBC	90/43622 genes: 0,21%
Ribosome, eukaryotes	KEGG:hsa_M00177	5.44e-07	0.000824	8	RPL12|RPL19|RPL41|RPL8|RPL9|RPS12|RPS15|RPS27	91/43622 genes: 0,21%
Viral mRNA Translation	REACT:R-HSA-192823	5.92e-07	0.000897	8	RPL12|RPL19|RPL41|RPL8|RPL9|RPS12|RPS15|RPS27	92/43622 genes: 0,21%
Signaling by FGFR3	REACT:R-HSA-5654741	6.04e-07	0.000916	6	FGFR3|GRB2|MAPK1|MAPK3|UBB|UBC	40/43622 genes: 0,09%
Translation	REACT:R-HSA-72766	6.09e-07	0.000923	10	EEF1A1|EEF1G|RPL12|RPL19|RPL41|RPL8|RPL9|RPS12|RPS15|RPS27	163/43622 genes: 0,37%
eNOS activation and regulation	REACT:R-HSA-203765	6.13e-07	0.00093	5	AKT1|CALM1|CALM2|DNM2|HSP90AA1	22/43622 genes: 0,05%
ERK/MAPK targets	REACT:R-HSA-198753	6.13e-07	0.00093	5	ELK1|MAPK1|MAPK3|MEF2C|RPS6KA2	22/43622 genes: 0,05%
Metabolism of nitric oxide	REACT:R-HSA-202131	6.13e-07	0.00093	5	AKT1|CALM1|CALM2|DNM2|HSP90AA1	22/43622 genes: 0,05%
Activation of the AP-1 family of transcription factors	REACT:R-HSA-450341	6.92e-07	0.00105	4	FOS|JUN|MAPK1|MAPK3	10/43622 genes: 0,02%
Neurotransmitter Clearance In The Synaptic Cleft	REACT:R-HSA-112311	6.92e-07	0.00105	4	ACHE|ALDH2|SLC22A2|SLC6A3	10/43622 genes: 0,02%
Signal attenuation	REACT:R-HSA-74749	6.92e-07	0.00105	4	GRB2|IRS2|MAPK1|MAPK3	10/43622 genes: 0,02%
Thyroxine biosynthesis	REACT:R-HSA-209968	6.92e-07	0.00105	4	DIO1|SLC5A5|TPO|TSHB	10/43622 genes: 0,02%
Graft-versus-host disease	KEGG:hsa05332	7.03e-07	0.00107	6	FAS|FASLG|IFNG|IL1B|IL2|TNF	41/43622 genes: 0,09%
Selenocysteine synthesis	REACT:R-HSA-2408557	7.57e-07	0.00115	8	RPL12|RPL19|RPL41|RPL8|RPL9|RPS12|RPS15|RPS27	95/43622 genes: 0,22%
Eukaryotic Translation Termination	REACT:R-HSA-72764	8.21e-07	0.00124	8	RPL12|RPL19|RPL41|RPL8|RPL9|RPS12|RPS15|RPS27	96/43622 genes: 0,22%
Glycolysis / Gluconeogenesis	KEGG:hsa00010	8.67e-07	0.00131	7	ALDH2|ALDOC|ENO1|ENO2|HK1|PDHA1|TPI1	67/43622 genes: 0,15%
TNF signaling	REACT:R-HSA-75893	9.41e-07	0.00143	6	CASP8|RIPK1|TNF|TNFAIP3|UBB|UBC	43/43622 genes: 0,10%
Type I diabetes mellitus	KEGG:hsa04940	9.41e-07	0.00143	6	FAS|FASLG|IFNG|IL1B|IL2|TNF	43/43622 genes: 0,10%
Activation of NF-kappaB in B cells	REACT:R-HSA-1169091	9.6e-07	0.00146	7	NFKB1|NFKBIA|PSMB1|PSMC4|RELA|UBB|UBC	68/43622 genes: 0,16%
Semaphorin interactions	REACT:R-HSA-373755	9.6e-07	0.00146	7	CDK5R1|GSK3B|HSP90AA1|HSP90AB1|LIMK2|ROCK1|SEMA4D	68/43622 genes: 0,16%
Cytochrome c oxidase	KEGG:hsa_M00154	9.77e-07	0.00148	5	COX5A|COX6A1|COX6B1|COX7A2|COX7A2L	24/43622 genes: 0,06%
Nonsense Mediated Decay (NMD) independent of the Exon Junction Complex (EJC)	REACT:R-HSA-975956	1.04e-06	0.00157	8	RPL12|RPL19|RPL41|RPL8|RPL9|RPS12|RPS15|RPS27	99/43622 genes: 0,23%
CASP8 activity is inhibited	REACT:R-HSA-5218900	1.08e-06	0.00164	4	CASP8|FAS|FASLG|RIPK1	11/43622 genes: 0,03%
Dimerization of procaspase-8	REACT:R-HSA-69416	1.08e-06	0.00164	4	CASP8|FAS|FASLG|RIPK1	11/43622 genes: 0,03%
Regulation by c-FLIP	REACT:R-HSA-3371378	1.08e-06	0.00164	4	CASP8|FAS|FASLG|RIPK1	11/43622 genes: 0,03%
Downstream TCR signaling	REACT:R-HSA-202424	1.21e-06	0.00183	8	NFKB1|NFKBIA|PSMB1|PSMC4|RELA|TRAF6|UBB|UBC	101/43622 genes: 0,23%
Synthesis of DNA	REACT:R-HSA-69239	1.21e-06	0.00183	8	CDK2|CDKN1A|PCNA|PSMB1|PSMC4|RB1|UBB|UBC	101/43622 genes: 0,23%
Glycolysis (Embden-Meyerhof pathway), glucose => pyruvate	KEGG:hsa_M00001	1.21e-06	0.00184	5	ALDOC|ENO1|ENO2|HK1|TPI1	25/43622 genes: 0,06%
Growth hormone receptor signaling	REACT:R-HSA-982772	1.21e-06	0.00184	5	IRS2|MAPK1|MAPK3|PRL|STAT3	25/43622 genes: 0,06%
Circadian Clock	REACT:R-HSA-400253	1.29e-06	0.00196	7	CREB1|HDAC3|MEF2C|SERPINE1|SIRT1|UBB|UBC	71/43622 genes: 0,16%
Respiratory electron transport	REACT:R-HSA-611105	1.3e-06	0.00198	8	COX5A|COX6A1|COX6B1|COX7A2L|CYC1|CYCS|SDHB|UQCRC1	102/43622 genes: 0,23%
Glucagon signaling pathway	KEGG:hsa04922	1.4e-06	0.00213	8	AKT1|CALM1|CALM2|CREB1|ITPR1|PDHA1|PRKACA|SIRT1	103/43622 genes: 0,24%
Orc1 removal from chromatin	REACT:R-HSA-68949	1.42e-06	0.00215	7	CDK2|CDKN1A|PSMB1|PSMC4|RB1|UBB|UBC	72/43622 genes: 0,17%
Switching of origins to a post-replicative state	REACT:R-HSA-69052	1.42e-06	0.00215	7	CDK2|CDKN1A|PSMB1|PSMC4|RB1|UBB|UBC	72/43622 genes: 0,17%
eNOS activation	REACT:R-HSA-203615	1.61e-06	0.00244	4	AKT1|CALM1|CALM2|HSP90AA1	12/43622 genes: 0,03%
Tetrahydrobiopterin (BH4) synthesis, recycling, salvage and regulation	REACT:R-HSA-1474151	1.61e-06	0.00244	4	AKT1|CALM1|CALM2|HSP90AA1	12/43622 genes: 0,03%
Formation of a pool of free 40S subunits	REACT:R-HSA-72689	1.63e-06	0.00246	8	RPL12|RPL19|RPL41|RPL8|RPL9|RPS12|RPS15|RPS27	105/43622 genes: 0,24%
Removal of licensing factors from origins	REACT:R-HSA-69300	1.71e-06	0.0026	7	CDK2|CDKN1A|PSMB1|PSMC4|RB1|UBB|UBC	74/43622 genes: 0,17%
Oncogenic MAPK signaling	REACT:R-HSA-6802957	1.88e-06	0.00285	7	BCL2L11|MACF1|MAP2K1|MAPK1|MAPK3|PEBP1|RAF1	75/43622 genes: 0,17%
Signaling by FGFR2	REACT:R-HSA-5654738	1.88e-06	0.00285	7	GRB2|HNRNPM|MAPK1|MAPK3|POLR2K|UBB|UBC	75/43622 genes: 0,17%
Adrenergic signaling in cardiomyocytes	KEGG:hsa04261	1.91e-06	0.0029	9	AKT1|BCL2|CALM1|CALM2|CREB1|MAPK1|MAPK3|PRKACA|SLC8A1	144/43622 genes: 0,33%
Malaria	KEGG:hsa05144	2.08e-06	0.00315	6	CCL2|CXCL8|IFNG|IL1B|TGFB1|TNF	49/43622 genes: 0,11%
Calmodulin induced events	REACT:R-HSA-111933	2.2e-06	0.00334	5	CALM1|CALM2|CREB1|PDE1B|PRKACA	28/43622 genes: 0,06%
CaM pathway	REACT:R-HSA-111997	2.2e-06	0.00334	5	CALM1|CALM2|CREB1|PDE1B|PRKACA	28/43622 genes: 0,06%
Peptide ligand-binding receptors	REACT:R-HSA-375276	2.23e-06	0.00337	10	CCL19|CCL21|CXCL10|CXCL8|HCRTR1|KISS1|NPS|PDYN|PNOC|PSAP	188/43622 genes: 0,43%
Signaling by TGF-beta Receptor Complex	REACT:R-HSA-170834	2.24e-06	0.0034	7	MYC|PRKCZ|SERPINE1|TGFB1|UBB|UBC|UCHL5	77/43622 genes: 0,18%
Caspase-mediated cleavage of cytoskeletal proteins	REACT:R-HSA-264870	2.31e-06	0.00351	4	CASP3|CASP7|CASP8|MAPT	13/43622 genes: 0,03%
Downregulation of ERBB2:ERBB3 signaling	REACT:R-HSA-1358803	2.31e-06	0.00351	4	AKT1|NRG1|UBB|UBC	13/43622 genes: 0,03%
TNFR1-induced proapoptotic signaling	REACT:R-HSA-5357786	2.31e-06	0.00351	4	CASP8|RIPK1|TNF|TNFAIP3	13/43622 genes: 0,03%
TP53 Regulates Transcription of Genes Involved in G1 Cell Cycle Arrest	REACT:R-HSA-6804116	2.31e-06	0.00351	4	CDK2|CDKN1A|E2F1|TP53	13/43622 genes: 0,03%
Uptake and function of anthrax toxins	REACT:R-HSA-5210891	2.31e-06	0.00351	4	CALM1|CALM2|MAP2K1|MAP2K6	13/43622 genes: 0,03%
Signaling by ERBB2	REACT:R-HSA-1227986	2.34e-06	0.00355	6	AKT1|GRB2|HSP90AA1|NRG1|UBB|UBC	50/43622 genes: 0,11%
RNA Polymerase I, RNA Polymerase III, and Mitochondrial Transcription	REACT:R-HSA-504046	2.54e-06	0.00385	9	BRF1|H2AC20|H2AC6|H2BC9|MAPK3|MBD3|NFIB|POLR1C|POLR2K	149/43622 genes: 0,34%
Neurotransmitter Release Cycle	REACT:R-HSA-112310	2.64e-06	0.004	6	ALDH5A1|CPLX1|HSPA8|SLC18A2|SLC22A2|SLC5A7	51/43622 genes: 0,12%
VEGFR2 mediated vascular permeability	REACT:R-HSA-5218920	2.65e-06	0.00401	5	AKT1|CALM1|CALM2|HSP90AA1|MTOR	29/43622 genes: 0,07%
Organelle biogenesis and maintenance	REACT:R-HSA-1852241	2.8e-06	0.00425	13	CDK5RAP2|CEP290|CREB1|CYCS|DAP3|HDAC3|HDAC6|HSP90AA1|MEF2C|MRPL15|PRKACA|SIRT3|TUBA1A	340/43622 genes: 0,78%
Citrate cycle (TCA cycle)	KEGG:hsa00020	3.16e-06	0.00478	5	ACO2|DLST|IDH3A|PDHA1|SDHB	30/43622 genes: 0,07%
Downregulation of ERBB2 signaling	REACT:R-HSA-8863795	3.16e-06	0.00478	5	AKT1|HSP90AA1|NRG1|UBB|UBC	30/43622 genes: 0,07%
Pre-NOTCH Transcription and Translation	REACT:R-HSA-1912408	3.16e-06	0.00478	5	AGO3|CCND1|E2F1|JUN|TP53	30/43622 genes: 0,07%
Ribosome	KEGG:hsa03010	3.16e-06	0.00478	9	MRPL15|RPL12|RPL19|RPL41|RPL8|RPL9|RPS12|RPS15|RPS27	153/43622 genes: 0,35%
Regulation of necroptotic cell death	REACT:R-HSA-5675482	3.22e-06	0.00488	4	CASP8|FAS|FASLG|RIPK1	14/43622 genes: 0,03%
SRP-dependent cotranslational protein targeting to membrane	REACT:R-HSA-1799339	3.23e-06	0.00489	8	RPL12|RPL19|RPL41|RPL8|RPL9|RPS12|RPS15|RPS27	115/43622 genes: 0,26%
Aldosterone synthesis and secretion	KEGG:hsa04925	3.43e-06	0.00521	7	CALM1|CALM2|CREB1|ITPR1|NR4A1|NR4A2|PRKACA	82/43622 genes: 0,19%
Chemical carcinogenesis	KEGG:hsa05204	3.43e-06	0.00521	7	CYP1A1|CYP1A2|CYP2E1|GSTA3|GSTA4|GSTP1|PTGS2	82/43622 genes: 0,19%
GTP hydrolysis and joining of the 60S ribosomal subunit	REACT:R-HSA-72706	3.67e-06	0.00556	8	RPL12|RPL19|RPL41|RPL8|RPL9|RPS12|RPS15|RPS27	117/43622 genes: 0,27%
L13a-mediated translational silencing of Ceruloplasmin expression	REACT:R-HSA-156827	3.67e-06	0.00556	8	RPL12|RPL19|RPL41|RPL8|RPL9|RPS12|RPS15|RPS27	117/43622 genes: 0,27%
Regulation of lipolysis in adipocytes	KEGG:hsa04923	3.71e-06	0.00563	6	ADORA1|AKT1|IRS2|PRKACA|PTGS2|TSHB	54/43622 genes: 0,12%
Antifolate resistance	KEGG:hsa01523	3.74e-06	0.00567	5	IL1B|MTHFR|NFKB1|RELA|TNF	31/43622 genes: 0,07%
Negative regulation of FGFR4 signaling	REACT:R-HSA-5654733	3.74e-06	0.00567	5	GRB2|MAPK1|MAPK3|UBB|UBC	31/43622 genes: 0,07%
Basal cell carcinoma	KEGG:hsa05217	4.14e-06	0.00628	6	BMP2|BMP4|GSK3B|TP53|WNT1|WNT5A	55/43622 genes: 0,13%
Activation of BAD and translocation to mitochondria	REACT:R-HSA-111447	4.36e-06	0.00661	4	AKT1|BAD|BCL2|BID	15/43622 genes: 0,03%
Toll-like receptor signaling	KEGG:hsa_M00686	4.36e-06	0.00661	4	NFKB1|NFKBIA|RELA|TRAF6	15/43622 genes: 0,03%
Glycolysis	REACT:R-HSA-70171	4.4e-06	0.00668	5	ALDOC|ENO1|ENO2|HK1|TPI1	32/43622 genes: 0,07%
Vesicle-mediated transport	REACT:R-HSA-5653656	4.41e-06	0.00668	18	AKT1|ALB|ARF3|BICD1|CALM1|CALM2|CHRM2|COPE|DNM2|GRB2|HSP90AA1|HSPA8|KIF1B|STON2|UBB|UBC|VPS45|WNT5A	659/43622 genes: 1,51%
Activation of NOXA and translocation to mitochondria	REACT:R-HSA-111448	4.44e-06	0.00673	3	E2F1|PMAIP1|TP53	5/43622 genes: 0,01%
CaMK IV-mediated phosphorylation of CREB	REACT:R-HSA-111932	4.44e-06	0.00673	3	CALM1|CALM2|CREB1	5/43622 genes: 0,01%
Dopamine receptors	REACT:R-HSA-390651	4.44e-06	0.00673	3	DRD2|DRD4|DRD5	5/43622 genes: 0,01%
FasL/ CD95L signaling	REACT:R-HSA-75157	4.44e-06	0.00673	3	CASP8|FAS|FASLG	5/43622 genes: 0,01%
SMAC binds to IAPs	REACT:R-HSA-111463	4.44e-06	0.00673	3	CASP3|CASP7|CASP9	5/43622 genes: 0,01%
SMAC-mediated apoptotic response	REACT:R-HSA-111469	4.44e-06	0.00673	3	CASP3|CASP7|CASP9	5/43622 genes: 0,01%
SMAC-mediated dissociation of IAP:caspase complexes	REACT:R-HSA-111464	4.44e-06	0.00673	3	CASP3|CASP7|CASP9	5/43622 genes: 0,01%
Ion homeostasis	REACT:R-HSA-5578775	4.61e-06	0.00699	6	CALM1|CALM2|FXYD6|ITPR1|PRKACA|SLC8A1	56/43622 genes: 0,13%
TCR signaling	REACT:R-HSA-202403	5.01e-06	0.0076	8	NFKB1|NFKBIA|PSMB1|PSMC4|RELA|TRAF6|UBB|UBC	122/43622 genes: 0,28%
Negative regulation of FGFR1 signaling	REACT:R-HSA-5654726	5.16e-06	0.00782	5	GRB2|MAPK1|MAPK3|UBB|UBC	33/43622 genes: 0,08%
ROS, RNS production in phagocytes	REACT:R-HSA-1222556	5.16e-06	0.00782	5	ATP6V0B|ATP6V0C|ATP6V1C1|NCF1|NOS2	33/43622 genes: 0,08%
Platelet activation	KEGG:hsa04611	5.33e-06	0.00808	8	ACTG1|AKT1|ITPR1|MAPK1|MAPK3|PRKACA|PRKCZ|ROCK1	123/43622 genes: 0,28%
Transcriptional regulation of white adipocyte differentiation	REACT:R-HSA-381340	5.51e-06	0.00836	7	CEBPD|HDAC3|NFKB1|RELA|TGFB1|TNF|WNT1	88/43622 genes: 0,20%
M Phase	REACT:R-HSA-68886	5.59e-06	0.00847	12	H2AC20|H2AC6|H2BC9|MAPK1|MAPK3|NIPBL|PSMB1|PSMC4|RB1|RPS27|UBB|UBC	308/43622 genes: 0,71%
MAP3K8 (TPL2)-dependent MAPK1/3 activation	REACT:R-HSA-5684264	5.78e-06	0.00876	4	MAP2K1|NFKB1|UBB|UBC	16/43622 genes: 0,04%
Regulated Necrosis	REACT:R-HSA-5218859	5.78e-06	0.00876	4	CASP8|FAS|FASLG|RIPK1	16/43622 genes: 0,04%
RIPK1-mediated regulated necrosis	REACT:R-HSA-5213460	5.78e-06	0.00876	4	CASP8|FAS|FASLG|RIPK1	16/43622 genes: 0,04%
Dilated cardiomyopathy	KEGG:hsa05414	5.94e-06	0.00901	7	ACTG1|IGF1|ITGB8|PRKACA|SLC8A1|TGFB1|TNF	89/43622 genes: 0,20%
Cap-dependent Translation Initiation	REACT:R-HSA-72737	6e-06	0.0091	8	RPL12|RPL19|RPL41|RPL8|RPL9|RPS12|RPS15|RPS27	125/43622 genes: 0,29%
Eukaryotic Translation Initiation	REACT:R-HSA-72613	6e-06	0.0091	8	RPL12|RPL19|RPL41|RPL8|RPL9|RPS12|RPS15|RPS27	125/43622 genes: 0,29%
Respiratory electron transport, ATP synthesis by chemiosmotic coupling, and heat production by uncoupling proteins.	REACT:R-HSA-163200	6e-06	0.0091	8	COX5A|COX6A1|COX6B1|COX7A2L|CYC1|CYCS|SDHB|UQCRC1	125/43622 genes: 0,29%
African trypanosomiasis	KEGG:hsa05143	6.01e-06	0.00911	5	FAS|FASLG|IFNG|IL1B|TNF	34/43622 genes: 0,08%
Negative regulation of FGFR2 signaling	REACT:R-HSA-5654727	6.01e-06	0.00911	5	GRB2|MAPK1|MAPK3|UBB|UBC	34/43622 genes: 0,08%
Regulation of PLK1 Activity at G2/M Transition	REACT:R-HSA-2565942	6.4e-06	0.00971	7	CDK5RAP2|CEP290|HSP90AA1|PRKACA|TUBA1A|UBB|UBC	90/43622 genes: 0,21%
DNA Double-Strand Break Repair	REACT:R-HSA-5693532	6.45e-06	0.00978	9	APBB1|CDK2|H2BC9|PCNA|SUMO1|TP53|UBB|UBC|XRCC1	167/43622 genes: 0,38%

## Sheet: MB-CGNs
#term ID	term description	observed gene count	background gene count	false discovery rate	matching proteins in your network (IDs)	matching proteins in your network (labels)
mmu03010	Ribosome	55	128	8.32e-76	ENSMUSP00000003521	ENSMUSP00000004072	ENSMUSP00000004554	ENSMUSP00000006496	ENSMUSP00000008812	ENSMUSP00000017548	ENSMUSP00000025511	ENSMUSP00000029722	ENSMUSP00000031617	ENSMUSP00000032998	ENSMUSP00000034966	ENSMUSP00000038352	ENSMUSP00000046506	ENSMUSP00000048469	ENSMUSP00000054490	ENSMUSP00000058432	ENSMUSP00000058919	ENSMUSP00000071616	ENSMUSP00000073175	ENSMUSP00000073880	ENSMUSP00000079163	ENSMUSP00000079180	ENSMUSP00000079340	ENSMUSP00000079628	ENSMUSP00000080354	ENSMUSP00000080523	ENSMUSP00000080854	ENSMUSP00000081474	ENSMUSP00000086614	ENSMUSP00000092502	ENSMUSP00000095287	ENSMUSP00000099435	ENSMUSP00000099595	ENSMUSP00000099757	ENSMUSP00000099878	ENSMUSP00000099909	ENSMUSP00000102213	ENSMUSP00000103365	ENSMUSP00000103940	ENSMUSP00000104067	ENSMUSP00000106014	ENSMUSP00000108837	ENSMUSP00000110013	ENSMUSP00000110532	ENSMUSP00000110731
mmu05012	Parkinson's disease	24	138	8.72e-24	ENSMUSP00000000090	ENSMUSP00000005647	ENSMUSP00000013737	ENSMUSP00000014457	ENSMUSP00000022286	ENSMUSP00000022980	ENSMUSP00000023085	ENSMUSP00000023210	ENSMUSP00000026222	ENSMUSP00000027111	ENSMUSP00000027478	ENSMUSP00000033157	ENSMUSP00000033176	ENSMUSP00000042967	ENSMUSP00000043543	ENSMUSP00000057543	ENSMUSP00000065352	ENSMUSP00000074600	ENSMUSP00000079944	ENSMUSP00000085523	ENSMUSP00000101003	ENSMUSP00000105796	ENSMUSP00000121557	ENSMUSP00000136313	Cox5a	Cox5b	Cox6c	Cyc1	Gnai2	Ndufa10	Ndufa12	Ndufa13	Ndufa6	Ndufa8	Ndufa9	Ndufab1	Ndufb10	Ndufb8	Ndufb9	Ndufs1	Ndufs2	Ndufs3	Ndufs4	Ndufs7	Ndufs8
mmu00190	Oxidative phosphorylation	23	129	3.78e-23	ENSMUSP00000000090	ENSMUSP00000005647	ENSMUSP00000013737	ENSMUSP00000014457	ENSMUSP00000022286	ENSMUSP00000022980	ENSMUSP00000023085	ENSMUSP00000023210	ENSMUSP00000026222	ENSMUSP00000027111	ENSMUSP00000027478	ENSMUSP00000033157	ENSMUSP00000033176	ENSMUSP00000042967	ENSMUSP00000043543	ENSMUSP00000065352	ENSMUSP00000074600	ENSMUSP00000079944	ENSMUSP00000085523	ENSMUSP00000101003	ENSMUSP00000105796	ENSMUSP00000121557	ENSMUSP00000136313	Cox5a	Cox5b	Cox6c	Cyc1	Ndufa10	Ndufa12	Ndufa13	Ndufa6	Ndufa8	Ndufa9	Ndufab1	Ndufb10	Ndufb8	Ndufb9	Ndufs1	Ndufs2	Ndufs3	Ndufs4	Ndufs7	Ndufs8	Ndufv1	Ndufv2
mmu04932	Non-alcoholic fatty liver disease (NAFLD)	23	146	3.56e-22	ENSMUSP00000000090	ENSMUSP00000005647	ENSMUSP00000013737	ENSMUSP00000014457	ENSMUSP00000022286	ENSMUSP00000022980	ENSMUSP00000023085	ENSMUSP00000023210	ENSMUSP00000026222	ENSMUSP00000027111	ENSMUSP00000027478	ENSMUSP00000033157	ENSMUSP00000033176	ENSMUSP00000042967	ENSMUSP00000043543	ENSMUSP00000065352	ENSMUSP00000074600	ENSMUSP00000079944	ENSMUSP00000085523	ENSMUSP00000101003	ENSMUSP00000105796	ENSMUSP00000121557	ENSMUSP00000136313	Cox5a	Cox5b	Cox6c	Cyc1	Ndufa10	Ndufa12	Ndufa13	Ndufa6	Ndufa8	Ndufa9	Ndufab1	Ndufb10	Ndufb8	Ndufb9	Ndufs1	Ndufs2	Ndufs3	Ndufs4	Ndufs7	Ndufs8	Ndufv1	Ndufv2
mmu05016	Huntington's disease	24	187	2.33e-21	ENSMUSP00000000090	ENSMUSP00000005647	ENSMUSP00000007012	ENSMUSP00000013737	ENSMUSP00000014457	ENSMUSP00000022286	ENSMUSP00000022980	ENSMUSP00000023085	ENSMUSP00000023210	ENSMUSP00000026222	ENSMUSP00000027111	ENSMUSP00000027478	ENSMUSP00000033157	ENSMUSP00000033176	ENSMUSP00000042967	ENSMUSP00000043543	ENSMUSP00000065352	ENSMUSP00000074600	ENSMUSP00000079944	ENSMUSP00000085523	ENSMUSP00000101003	ENSMUSP00000105796	ENSMUSP00000121557	ENSMUSP00000136313	Cox5a	Cox5b	Cox6c	Cyc1	Ndufa10	Ndufa12	Ndufa13	Ndufa6	Ndufa8	Ndufa9	Ndufab1	Ndufb10	Ndufb8	Ndufb9	Ndufs1	Ndufs2	Ndufs3	Ndufs4	Ndufs7	Ndufs8	Ndufv1
mmu05010	Alzheimer's disease	23	167	3.74e-21	ENSMUSP00000000090	ENSMUSP00000005647	ENSMUSP00000013737	ENSMUSP00000014457	ENSMUSP00000022286	ENSMUSP00000022980	ENSMUSP00000023085	ENSMUSP00000023210	ENSMUSP00000026222	ENSMUSP00000027111	ENSMUSP00000027478	ENSMUSP00000033157	ENSMUSP00000033176	ENSMUSP00000042967	ENSMUSP00000043543	ENSMUSP00000065352	ENSMUSP00000074600	ENSMUSP00000079944	ENSMUSP00000085523	ENSMUSP00000101003	ENSMUSP00000105796	ENSMUSP00000121557	ENSMUSP00000136313	Cox5a	Cox5b	Cox6c	Cyc1	Ndufa10	Ndufa12	Ndufa13	Ndufa6	Ndufa8	Ndufa9	Ndufab1	Ndufb10	Ndufb8	Ndufb9	Ndufs1	Ndufs2	Ndufs3	Ndufs4	Ndufs7	Ndufs8	Ndufv1	Ndufv2
mmu04714	Thermogenesis	24	223	7.36e-20	ENSMUSP00000000090	ENSMUSP00000005647	ENSMUSP00000013737	ENSMUSP00000014457	ENSMUSP00000022286	ENSMUSP00000022980	ENSMUSP00000023085	ENSMUSP00000023210	ENSMUSP00000026222	ENSMUSP00000027111	ENSMUSP00000027478	ENSMUSP00000033157	ENSMUSP00000033176	ENSMUSP00000042967	ENSMUSP00000043543	ENSMUSP00000065352	ENSMUSP00000074600	ENSMUSP00000079944	ENSMUSP00000085523	ENSMUSP00000099878	ENSMUSP00000101003	ENSMUSP00000105796	ENSMUSP00000121557	ENSMUSP00000136313	Cox5a	Cox5b	Cox6c	Cyc1	Ndufa10	Ndufa12	Ndufa13	Ndufa6	Ndufa8	Ndufa9	Ndufab1	Ndufb10	Ndufb8	Ndufb9	Ndufs1	Ndufs2	Ndufs3	Ndufs4	Ndufs7	Ndufs8	Ndufv1
mmu03050	Proteasome	14	45	3.11e-17	ENSMUSP00000017365	ENSMUSP00000017572	ENSMUSP00000021049	ENSMUSP00000021063	ENSMUSP00000021595	ENSMUSP00000022256	ENSMUSP00000022380	ENSMUSP00000026560	ENSMUSP00000027432	ENSMUSP00000028278	ENSMUSP00000030769	ENSMUSP00000032824	ENSMUSP00000041968	ENSMUSP00000051657	Psmc1	Psmc2	Psmc4	Psmc5	Psmc6	Psmd1	Psmd11	Psmd12	Psmd13	Psmd14	Psmd3	Psmd6	Psmd7	Psmd8
mmu04723	Retrograde endocannabinoid signaling	19	145	3.21e-17	ENSMUSP00000005647	ENSMUSP00000013737	ENSMUSP00000022286	ENSMUSP00000022980	ENSMUSP00000023085	ENSMUSP00000026222	ENSMUSP00000027111	ENSMUSP00000027478	ENSMUSP00000033157	ENSMUSP00000042967	ENSMUSP00000043543	ENSMUSP00000057543	ENSMUSP00000065352	ENSMUSP00000074600	ENSMUSP00000085523	ENSMUSP00000101003	ENSMUSP00000105796	ENSMUSP00000121557	ENSMUSP00000136313	Gnai2	Ndufa10	Ndufa12	Ndufa13	Ndufa6	Ndufa8	Ndufa9	Ndufab1	Ndufb10	Ndufb8	Ndufb9	Ndufs1	Ndufs2	Ndufs3	Ndufs4	Ndufs7	Ndufs8	Ndufv1	Ndufv2
mmu05169	Epstein-Barr virus infection	16	205	2.49e-11	ENSMUSP00000017365	ENSMUSP00000017572	ENSMUSP00000021049	ENSMUSP00000021063	ENSMUSP00000021595	ENSMUSP00000022256	ENSMUSP00000022380	ENSMUSP00000026560	ENSMUSP00000027432	ENSMUSP00000028062	ENSMUSP00000028278	ENSMUSP00000030769	ENSMUSP00000032824	ENSMUSP00000041968	ENSMUSP00000051657	ENSMUSP00000099933	Psmc1	Psmc2	Psmc4	Psmc5	Psmc6	Psmd1	Psmd11	Psmd12	Psmd13	Psmd14	Psmd3	Psmd6	Psmd7	Psmd8	Vim	Xpo1
mmu01100	Metabolic pathways	25	1296	2.7e-05	ENSMUSP00000000090	ENSMUSP00000005647	ENSMUSP00000013737	ENSMUSP00000014457	ENSMUSP00000022286	ENSMUSP00000022980	ENSMUSP00000023085	ENSMUSP00000023210	ENSMUSP00000026222	ENSMUSP00000027111	ENSMUSP00000027478	ENSMUSP00000033157	ENSMUSP00000033176	ENSMUSP00000036696	ENSMUSP00000042967	ENSMUSP00000043543	ENSMUSP00000045841	ENSMUSP00000065352	ENSMUSP00000074600	ENSMUSP00000079944	ENSMUSP00000085523	ENSMUSP00000101003	ENSMUSP00000105796	ENSMUSP00000121557	ENSMUSP00000136313	Cox5a	Cox5b	Cox6c	Cyc1	Eprs	Gmds	Ndufa10	Ndufa12	Ndufa13	Ndufa6	Ndufa8	Ndufa9	Ndufab1	Ndufb10	Ndufb8	Ndufb9	Ndufs1	Ndufs2	Ndufs3	Ndufs4
mmu04260	Cardiac muscle contraction	5	75	0.0019	ENSMUSP00000000090	ENSMUSP00000014457	ENSMUSP00000023210	ENSMUSP00000033176	ENSMUSP00000079944	Cox5a	Cox5b	Cox6c	Cyc1	Uqcrc2
mmu03008	Ribosome biogenesis in eukaryotes	4	76	0.0178	ENSMUSP00000033776	ENSMUSP00000037613	ENSMUSP00000099933	ENSMUSP00000140250	Dkc1	Fbl	Nop58	Xpo1
MMU-8953854	Metabolism of RNA	38	448	5.2e-27	ENSMUSP00000003521	ENSMUSP00000006496	ENSMUSP00000008812	ENSMUSP00000017365	ENSMUSP00000017572	ENSMUSP00000021049	ENSMUSP00000021063	ENSMUSP00000021595	ENSMUSP00000022256	ENSMUSP00000022380	ENSMUSP00000025511	ENSMUSP00000026560	ENSMUSP00000027432	ENSMUSP00000028278	ENSMUSP00000029722	ENSMUSP00000032824	ENSMUSP00000032998	ENSMUSP00000037613	ENSMUSP00000038580	ENSMUSP00000041968	ENSMUSP00000051657	ENSMUSP00000054490	ENSMUSP00000058432	ENSMUSP00000073880	ENSMUSP00000076989	ENSMUSP00000079180	ENSMUSP00000086640	ENSMUSP00000092502	ENSMUSP00000099933	ENSMUSP00000103940	ENSMUSP00000110013	ENSMUSP00000110532	ENSMUSP00000119975	ENSMUSP00000120096	ENSMUSP00000120528	ENSMUSP00000126294	ENSMUSP00000132102	ENSMUSP00000140250	Fbl	Hnrnph1	Nop58	Ppp2r2a	Psmc1	Psmc4	Psmc5
MMU-72689	Formation of a pool of free 40S subunits	18	37	7.69e-24	ENSMUSP00000003521	ENSMUSP00000006496	ENSMUSP00000008812	ENSMUSP00000025511	ENSMUSP00000029722	ENSMUSP00000032998	ENSMUSP00000054490	ENSMUSP00000058432	ENSMUSP00000073880	ENSMUSP00000079180	ENSMUSP00000092502	ENSMUSP00000103940	ENSMUSP00000110013	ENSMUSP00000110532	ENSMUSP00000119975	ENSMUSP00000120528	ENSMUSP00000126294	ENSMUSP00000132102	Rps10	Rps11	Rps13	Rps14	Rps15a	Rps16	Rps18	Rps2	Rps20	Rps21	Rps23	Rps25	Rps27	Rps28	Rps3	Rps3a1	Rps7	Rps9
MMU-72695	Formation of the ternary complex and subsequently the 43S complex	18	40	1.57e-23	ENSMUSP00000003521	ENSMUSP00000006496	ENSMUSP00000008812	ENSMUSP00000025511	ENSMUSP00000029722	ENSMUSP00000032998	ENSMUSP00000054490	ENSMUSP00000058432	ENSMUSP00000073880	ENSMUSP00000079180	ENSMUSP00000092502	ENSMUSP00000103940	ENSMUSP00000110013	ENSMUSP00000110532	ENSMUSP00000119975	ENSMUSP00000120528	ENSMUSP00000126294	ENSMUSP00000132102	Rps10	Rps11	Rps13	Rps14	Rps15a	Rps16	Rps18	Rps2	Rps20	Rps21	Rps23	Rps25	Rps27	Rps28	Rps3	Rps3a1	Rps7	Rps9
MMU-72702	Ribosomal scanning and start codon recognition	18	46	9.13e-23	ENSMUSP00000003521	ENSMUSP00000006496	ENSMUSP00000008812	ENSMUSP00000025511	ENSMUSP00000029722	ENSMUSP00000032998	ENSMUSP00000054490	ENSMUSP00000058432	ENSMUSP00000073880	ENSMUSP00000079180	ENSMUSP00000092502	ENSMUSP00000103940	ENSMUSP00000110013	ENSMUSP00000110532	ENSMUSP00000119975	ENSMUSP00000120528	ENSMUSP00000126294	ENSMUSP00000132102	Rps10	Rps11	Rps13	Rps14	Rps15a	Rps16	Rps18	Rps2	Rps20	Rps21	Rps23	Rps25	Rps27	Rps28	Rps3	Rps3a1	Rps7	Rps9
MMU-72649	Translation initiation complex formation	18	48	1.37e-22	ENSMUSP00000003521	ENSMUSP00000006496	ENSMUSP00000008812	ENSMUSP00000025511	ENSMUSP00000029722	ENSMUSP00000032998	ENSMUSP00000054490	ENSMUSP00000058432	ENSMUSP00000073880	ENSMUSP00000079180	ENSMUSP00000092502	ENSMUSP00000103940	ENSMUSP00000110013	ENSMUSP00000110532	ENSMUSP00000119975	ENSMUSP00000120528	ENSMUSP00000126294	ENSMUSP00000132102	Rps10	Rps11	Rps13	Rps14	Rps15a	Rps16	Rps18	Rps2	Rps20	Rps21	Rps23	Rps25	Rps27	Rps28	Rps3	Rps3a1	Rps7	Rps9
MMU-156827	L13a-mediated translational silencing of Ceruloplasmin expression	18	50	1.8e-22	ENSMUSP00000003521	ENSMUSP00000006496	ENSMUSP00000008812	ENSMUSP00000025511	ENSMUSP00000029722	ENSMUSP00000032998	ENSMUSP00000054490	ENSMUSP00000058432	ENSMUSP00000073880	ENSMUSP00000079180	ENSMUSP00000092502	ENSMUSP00000103940	ENSMUSP00000110013	ENSMUSP00000110532	ENSMUSP00000119975	ENSMUSP00000120528	ENSMUSP00000126294	ENSMUSP00000132102	Rps10	Rps11	Rps13	Rps14	Rps15a	Rps16	Rps18	Rps2	Rps20	Rps21	Rps23	Rps25	Rps27	Rps28	Rps3	Rps3a1	Rps7	Rps9
MMU-6791226	Major pathway of rRNA processing in the nucleolus and cytosol	21	102	4.74e-22	ENSMUSP00000003521	ENSMUSP00000006496	ENSMUSP00000008812	ENSMUSP00000025511	ENSMUSP00000029722	ENSMUSP00000032998	ENSMUSP00000037613	ENSMUSP00000038580	ENSMUSP00000054490	ENSMUSP00000058432	ENSMUSP00000073880	ENSMUSP00000079180	ENSMUSP00000092502	ENSMUSP00000103940	ENSMUSP00000110013	ENSMUSP00000110532	ENSMUSP00000119975	ENSMUSP00000120528	ENSMUSP00000126294	ENSMUSP00000132102	ENSMUSP00000140250	Fbl	Nop58	Rps10	Rps11	Rps13	Rps14	Rps15a	Rps16	Rps18	Rps2	Rps20	Rps21	Rps23	Rps25	Rps27	Rps28	Rps3	Rps3a1	Rps7	Rps9	Rrp9
MMU-6799198	Complex I biogenesis	17	52	7.49e-21	ENSMUSP00000005647	ENSMUSP00000013737	ENSMUSP00000022980	ENSMUSP00000023085	ENSMUSP00000026222	ENSMUSP00000027111	ENSMUSP00000027478	ENSMUSP00000033157	ENSMUSP00000042967	ENSMUSP00000043543	ENSMUSP00000065352	ENSMUSP00000074600	ENSMUSP00000085523	ENSMUSP00000101003	ENSMUSP00000105796	ENSMUSP00000121557	ENSMUSP00000136313	Ndufa10	Ndufa12	Ndufa13	Ndufa6	Ndufa8	Ndufa9	Ndufab1	Ndufb10	Ndufb8	Ndufb9	Ndufs1	Ndufs2	Ndufs3	Ndufs7	Ndufs8	Ndufv1	Ndufv2
MMU-392499	Metabolism of proteins	47	1497	1.06e-17	ENSMUSP00000003521	ENSMUSP00000003912	ENSMUSP00000006496	ENSMUSP00000008812	ENSMUSP00000017365	ENSMUSP00000017572	ENSMUSP00000019638	ENSMUSP00000021049	ENSMUSP00000021063	ENSMUSP00000021595	ENSMUSP00000022256	ENSMUSP00000022380	ENSMUSP00000025511	ENSMUSP00000025645	ENSMUSP00000026560	ENSMUSP00000027050	ENSMUSP00000027432	ENSMUSP00000028278	ENSMUSP00000028681	ENSMUSP00000028683	ENSMUSP00000028826	ENSMUSP00000029722	ENSMUSP00000031779	ENSMUSP00000032824	ENSMUSP00000032998	ENSMUSP00000034588	ENSMUSP00000036696	ENSMUSP00000041968	ENSMUSP00000048416	ENSMUSP00000051657	ENSMUSP00000054490	ENSMUSP00000057543	ENSMUSP00000058432	ENSMUSP00000068971	ENSMUSP00000073880	ENSMUSP00000079180	ENSMUSP00000092502	ENSMUSP00000103940	ENSMUSP00000110013	ENSMUSP00000110532	ENSMUSP00000119975	ENSMUSP00000120096	ENSMUSP00000120528	ENSMUSP00000120904	ENSMUSP00000126294
MMU-69229	Ubiquitin-dependent degradation of Cyclin D1	14	46	7.63e-17	ENSMUSP00000017365	ENSMUSP00000017572	ENSMUSP00000021049	ENSMUSP00000021063	ENSMUSP00000021595	ENSMUSP00000022256	ENSMUSP00000022380	ENSMUSP00000026560	ENSMUSP00000027432	ENSMUSP00000028278	ENSMUSP00000032824	ENSMUSP00000041968	ENSMUSP00000051657	ENSMUSP00000120096	Psmc1	Psmc4	Psmc5	Psmc6	Psmd1	Psmd11	Psmd12	Psmd13	Psmd14	Psmd3	Psmd6	Psmd7	Psmd8	Uba52
MMU-8939902	Regulation of RUNX2 expression and activity	14	46	7.63e-17	ENSMUSP00000017365	ENSMUSP00000017572	ENSMUSP00000021049	ENSMUSP00000021063	ENSMUSP00000021595	ENSMUSP00000022256	ENSMUSP00000022380	ENSMUSP00000026560	ENSMUSP00000027432	ENSMUSP00000028278	ENSMUSP00000032824	ENSMUSP00000041968	ENSMUSP00000051657	ENSMUSP00000120096	Psmc1	Psmc4	Psmc5	Psmc6	Psmd1	Psmd11	Psmd12	Psmd13	Psmd14	Psmd3	Psmd6	Psmd7	Psmd8	Uba52
MMU-349425	Autodegradation of the E3 ubiquitin ligase COP1	14	47	8.37e-17	ENSMUSP00000017365	ENSMUSP00000017572	ENSMUSP00000021049	ENSMUSP00000021063	ENSMUSP00000021595	ENSMUSP00000022256	ENSMUSP00000022380	ENSMUSP00000026560	ENSMUSP00000027432	ENSMUSP00000028278	ENSMUSP00000032824	ENSMUSP00000041968	ENSMUSP00000051657	ENSMUSP00000120096	Psmc1	Psmc4	Psmc5	Psmc6	Psmd1	Psmd11	Psmd12	Psmd13	Psmd14	Psmd3	Psmd6	Psmd7	Psmd8	Uba52
MMU-69601	Ubiquitin Mediated Degradation of Phosphorylated Cdc25A	14	47	8.37e-17	ENSMUSP00000017365	ENSMUSP00000017572	ENSMUSP00000021049	ENSMUSP00000021063	ENSMUSP00000021595	ENSMUSP00000022256	ENSMUSP00000022380	ENSMUSP00000026560	ENSMUSP00000027432	ENSMUSP00000028278	ENSMUSP00000032824	ENSMUSP00000041968	ENSMUSP00000051657	ENSMUSP00000120096	Psmc1	Psmc4	Psmc5	Psmc6	Psmd1	Psmd11	Psmd12	Psmd13	Psmd14	Psmd3	Psmd6	Psmd7	Psmd8	Uba52
MMU-350562	Regulation of ornithine decarboxylase (ODC)	14	48	8.96e-17	ENSMUSP00000003947	ENSMUSP00000017365	ENSMUSP00000017572	ENSMUSP00000021049	ENSMUSP00000021063	ENSMUSP00000021595	ENSMUSP00000022256	ENSMUSP00000022380	ENSMUSP00000026560	ENSMUSP00000027432	ENSMUSP00000028278	ENSMUSP00000032824	ENSMUSP00000041968	ENSMUSP00000051657	Nqo1	Psmc1	Psmc4	Psmc5	Psmc6	Psmd1	Psmd11	Psmd12	Psmd13	Psmd14	Psmd3	Psmd6	Psmd7	Psmd8
MMU-4641257	Degradation of AXIN	14	49	1.1e-16	ENSMUSP00000017365	ENSMUSP00000017572	ENSMUSP00000021049	ENSMUSP00000021063	ENSMUSP00000021595	ENSMUSP00000022256	ENSMUSP00000022380	ENSMUSP00000026560	ENSMUSP00000027432	ENSMUSP00000028278	ENSMUSP00000032824	ENSMUSP00000041968	ENSMUSP00000051657	ENSMUSP00000120096	Psmc1	Psmc4	Psmc5	Psmc6	Psmd1	Psmd11	Psmd12	Psmd13	Psmd14	Psmd3	Psmd6	Psmd7	Psmd8	Uba52
MMU-8941858	Regulation of RUNX3 expression and activity	14	49	1.1e-16	ENSMUSP00000017365	ENSMUSP00000017572	ENSMUSP00000021049	ENSMUSP00000021063	ENSMUSP00000021595	ENSMUSP00000022256	ENSMUSP00000022380	ENSMUSP00000026560	ENSMUSP00000027432	ENSMUSP00000028278	ENSMUSP00000032824	ENSMUSP00000041968	ENSMUSP00000051657	ENSMUSP00000120096	Psmc1	Psmc4	Psmc5	Psmc6	Psmd1	Psmd11	Psmd12	Psmd13	Psmd14	Psmd3	Psmd6	Psmd7	Psmd8	Uba52
MMU-174113	SCF-beta-TrCP mediated degradation of Emi1	14	50	1.3e-16	ENSMUSP00000017365	ENSMUSP00000017572	ENSMUSP00000021049	ENSMUSP00000021063	ENSMUSP00000021595	ENSMUSP00000022256	ENSMUSP00000022380	ENSMUSP00000026560	ENSMUSP00000027432	ENSMUSP00000028278	ENSMUSP00000032824	ENSMUSP00000041968	ENSMUSP00000051657	ENSMUSP00000120096	Psmc1	Psmc4	Psmc5	Psmc6	Psmd1	Psmd11	Psmd12	Psmd13	Psmd14	Psmd3	Psmd6	Psmd7	Psmd8	Uba52
MMU-8854050	FBXL7 down-regulates AURKA during mitotic entry and in early mitosis	14	50	1.3e-16	ENSMUSP00000017365	ENSMUSP00000017572	ENSMUSP00000021049	ENSMUSP00000021063	ENSMUSP00000021595	ENSMUSP00000022256	ENSMUSP00000022380	ENSMUSP00000026560	ENSMUSP00000027432	ENSMUSP00000028278	ENSMUSP00000032824	ENSMUSP00000041968	ENSMUSP00000051657	ENSMUSP00000120096	Psmc1	Psmc4	Psmc5	Psmc6	Psmd1	Psmd11	Psmd12	Psmd13	Psmd14	Psmd3	Psmd6	Psmd7	Psmd8	Uba52
MMU-5687128	MAPK6/MAPK4 signaling	15	67	1.4e-16	ENSMUSP00000017365	ENSMUSP00000017572	ENSMUSP00000021049	ENSMUSP00000021063	ENSMUSP00000021595	ENSMUSP00000022256	ENSMUSP00000022380	ENSMUSP00000026560	ENSMUSP00000027432	ENSMUSP00000028278	ENSMUSP00000032824	ENSMUSP00000041968	ENSMUSP00000051657	ENSMUSP00000099933	ENSMUSP00000120096	Psmc1	Psmc4	Psmc5	Psmc6	Psmd1	Psmd11	Psmd12	Psmd13	Psmd14	Psmd3	Psmd6	Psmd7	Psmd8	Uba52	Xpo1
MMU-450408	AUF1 (hnRNP D0) binds and destabilizes mRNA	14	52	1.8e-16	ENSMUSP00000017365	ENSMUSP00000017572	ENSMUSP00000021049	ENSMUSP00000021063	ENSMUSP00000021595	ENSMUSP00000022256	ENSMUSP00000022380	ENSMUSP00000026560	ENSMUSP00000027432	ENSMUSP00000028278	ENSMUSP00000032824	ENSMUSP00000041968	ENSMUSP00000051657	ENSMUSP00000120096	Psmc1	Psmc4	Psmc5	Psmc6	Psmd1	Psmd11	Psmd12	Psmd13	Psmd14	Psmd3	Psmd6	Psmd7	Psmd8	Uba52
MMU-4641258	Degradation of DVL	14	52	1.8e-16	ENSMUSP00000017365	ENSMUSP00000017572	ENSMUSP00000021049	ENSMUSP00000021063	ENSMUSP00000021595	ENSMUSP00000022256	ENSMUSP00000022380	ENSMUSP00000026560	ENSMUSP00000027432	ENSMUSP00000028278	ENSMUSP00000032824	ENSMUSP00000041968	ENSMUSP00000051657	ENSMUSP00000120096	Psmc1	Psmc4	Psmc5	Psmc6	Psmd1	Psmd11	Psmd12	Psmd13	Psmd14	Psmd3	Psmd6	Psmd7	Psmd8	Uba52
MMU-5610780	Degradation of GLI1 by the proteasome	14	52	1.8e-16	ENSMUSP00000017365	ENSMUSP00000017572	ENSMUSP00000021049	ENSMUSP00000021063	ENSMUSP00000021595	ENSMUSP00000022256	ENSMUSP00000022380	ENSMUSP00000026560	ENSMUSP00000027432	ENSMUSP00000028278	ENSMUSP00000032824	ENSMUSP00000041968	ENSMUSP00000051657	ENSMUSP00000120096	Psmc1	Psmc4	Psmc5	Psmc6	Psmd1	Psmd11	Psmd12	Psmd13	Psmd14	Psmd3	Psmd6	Psmd7	Psmd8	Uba52
MMU-5607761	Dectin-1 mediated noncanonical NF-kB signaling	14	53	2.07e-16	ENSMUSP00000017365	ENSMUSP00000017572	ENSMUSP00000021049	ENSMUSP00000021063	ENSMUSP00000021595	ENSMUSP00000022256	ENSMUSP00000022380	ENSMUSP00000026560	ENSMUSP00000027432	ENSMUSP00000028278	ENSMUSP00000032824	ENSMUSP00000041968	ENSMUSP00000051657	ENSMUSP00000120096	Psmc1	Psmc4	Psmc5	Psmc6	Psmd1	Psmd11	Psmd12	Psmd13	Psmd14	Psmd3	Psmd6	Psmd7	Psmd8	Uba52
MMU-5676590	NIK-->noncanonical NF-kB signaling	14	53	2.07e-16	ENSMUSP00000017365	ENSMUSP00000017572	ENSMUSP00000021049	ENSMUSP00000021063	ENSMUSP00000021595	ENSMUSP00000022256	ENSMUSP00000022380	ENSMUSP00000026560	ENSMUSP00000027432	ENSMUSP00000028278	ENSMUSP00000032824	ENSMUSP00000041968	ENSMUSP00000051657	ENSMUSP00000120096	Psmc1	Psmc4	Psmc5	Psmc6	Psmd1	Psmd11	Psmd12	Psmd13	Psmd14	Psmd3	Psmd6	Psmd7	Psmd8	Uba52
MMU-68827	CDT1 association with the CDC6:ORC:origin complex	14	53	2.07e-16	ENSMUSP00000017365	ENSMUSP00000017572	ENSMUSP00000021049	ENSMUSP00000021063	ENSMUSP00000021595	ENSMUSP00000022256	ENSMUSP00000022380	ENSMUSP00000026560	ENSMUSP00000027432	ENSMUSP00000028278	ENSMUSP00000032824	ENSMUSP00000041968	ENSMUSP00000051657	ENSMUSP00000120096	Psmc1	Psmc4	Psmc5	Psmc6	Psmd1	Psmd11	Psmd12	Psmd13	Psmd14	Psmd3	Psmd6	Psmd7	Psmd8	Uba52
MMU-5610785	GLI3 is processed to GLI3R by the proteasome	14	54	2.38e-16	ENSMUSP00000017365	ENSMUSP00000017572	ENSMUSP00000021049	ENSMUSP00000021063	ENSMUSP00000021595	ENSMUSP00000022256	ENSMUSP00000022380	ENSMUSP00000026560	ENSMUSP00000027432	ENSMUSP00000028278	ENSMUSP00000032824	ENSMUSP00000041968	ENSMUSP00000051657	ENSMUSP00000120096	Psmc1	Psmc4	Psmc5	Psmc6	Psmd1	Psmd11	Psmd12	Psmd13	Psmd14	Psmd3	Psmd6	Psmd7	Psmd8	Uba52
MMU-187577	SCF(Skp2)-mediated degradation of p27/p21	14	55	2.89e-16	ENSMUSP00000017365	ENSMUSP00000017572	ENSMUSP00000021049	ENSMUSP00000021063	ENSMUSP00000021595	ENSMUSP00000022256	ENSMUSP00000022380	ENSMUSP00000026560	ENSMUSP00000027432	ENSMUSP00000028278	ENSMUSP00000032824	ENSMUSP00000041968	ENSMUSP00000051657	ENSMUSP00000120096	Psmc1	Psmc4	Psmc5	Psmc6	Psmd1	Psmd11	Psmd12	Psmd13	Psmd14	Psmd3	Psmd6	Psmd7	Psmd8	Uba52
MMU-174084	Autodegradation of Cdh1 by Cdh1:APC/C	14	57	4.22e-16	ENSMUSP00000017365	ENSMUSP00000017572	ENSMUSP00000021049	ENSMUSP00000021063	ENSMUSP00000021595	ENSMUSP00000022256	ENSMUSP00000022380	ENSMUSP00000026560	ENSMUSP00000027432	ENSMUSP00000028278	ENSMUSP00000032824	ENSMUSP00000041968	ENSMUSP00000051657	ENSMUSP00000120096	Psmc1	Psmc4	Psmc5	Psmc6	Psmd1	Psmd11	Psmd12	Psmd13	Psmd14	Psmd3	Psmd6	Psmd7	Psmd8	Uba52
MMU-4608870	Asymmetric localization of PCP proteins	14	57	4.22e-16	ENSMUSP00000017365	ENSMUSP00000017572	ENSMUSP00000021049	ENSMUSP00000021063	ENSMUSP00000021595	ENSMUSP00000022256	ENSMUSP00000022380	ENSMUSP00000026560	ENSMUSP00000027432	ENSMUSP00000028278	ENSMUSP00000032824	ENSMUSP00000041968	ENSMUSP00000051657	ENSMUSP00000120096	Psmc1	Psmc4	Psmc5	Psmc6	Psmd1	Psmd11	Psmd12	Psmd13	Psmd14	Psmd3	Psmd6	Psmd7	Psmd8	Uba52
MMU-450531	Regulation of mRNA stability by proteins that bind AU-rich elements	15	75	4.24e-16	ENSMUSP00000017365	ENSMUSP00000017572	ENSMUSP00000021049	ENSMUSP00000021063	ENSMUSP00000021595	ENSMUSP00000022256	ENSMUSP00000022380	ENSMUSP00000026560	ENSMUSP00000027432	ENSMUSP00000028278	ENSMUSP00000032824	ENSMUSP00000041968	ENSMUSP00000051657	ENSMUSP00000099933	ENSMUSP00000120096	Psmc1	Psmc4	Psmc5	Psmc6	Psmd1	Psmd11	Psmd12	Psmd13	Psmd14	Psmd3	Psmd6	Psmd7	Psmd8	Uba52	Xpo1
MMU-1169091	Activation of NF-kappaB in B cells	14	58	4.85e-16	ENSMUSP00000017365	ENSMUSP00000017572	ENSMUSP00000021049	ENSMUSP00000021063	ENSMUSP00000021595	ENSMUSP00000022256	ENSMUSP00000022380	ENSMUSP00000026560	ENSMUSP00000027432	ENSMUSP00000028278	ENSMUSP00000032824	ENSMUSP00000041968	ENSMUSP00000051657	ENSMUSP00000120096	Psmc1	Psmc4	Psmc5	Psmc6	Psmd1	Psmd11	Psmd12	Psmd13	Psmd14	Psmd3	Psmd6	Psmd7	Psmd8	Uba52
MMU-5358346	Hedgehog ligand biogenesis	14	58	4.85e-16	ENSMUSP00000017365	ENSMUSP00000017572	ENSMUSP00000021049	ENSMUSP00000021063	ENSMUSP00000021595	ENSMUSP00000022256	ENSMUSP00000022380	ENSMUSP00000026560	ENSMUSP00000027432	ENSMUSP00000028278	ENSMUSP00000032824	ENSMUSP00000041968	ENSMUSP00000051657	ENSMUSP00000120096	Psmc1	Psmc4	Psmc5	Psmc6	Psmd1	Psmd11	Psmd12	Psmd13	Psmd14	Psmd3	Psmd6	Psmd7	Psmd8	Uba52
MMU-1234176	Oxygen-dependent proline hydroxylation of Hypoxia-inducible Factor Alpha	14	60	6.66e-16	ENSMUSP00000017365	ENSMUSP00000017572	ENSMUSP00000021049	ENSMUSP00000021063	ENSMUSP00000021595	ENSMUSP00000022256	ENSMUSP00000022380	ENSMUSP00000026560	ENSMUSP00000027432	ENSMUSP00000028278	ENSMUSP00000032824	ENSMUSP00000041968	ENSMUSP00000051657	ENSMUSP00000120096	Psmc1	Psmc4	Psmc5	Psmc6	Psmd1	Psmd11	Psmd12	Psmd13	Psmd14	Psmd3	Psmd6	Psmd7	Psmd8	Uba52
MMU-351202	Metabolism of polyamines	15	79	7.2e-16	ENSMUSP00000003947	ENSMUSP00000017365	ENSMUSP00000017572	ENSMUSP00000021049	ENSMUSP00000021063	ENSMUSP00000021595	ENSMUSP00000022256	ENSMUSP00000022380	ENSMUSP00000026560	ENSMUSP00000027432	ENSMUSP00000028278	ENSMUSP00000032824	ENSMUSP00000041968	ENSMUSP00000051657	ENSMUSP00000078132	Nmral1	Nqo1	Psmc1	Psmc4	Psmc5	Psmc6	Psmd1	Psmd11	Psmd12	Psmd13	Psmd14	Psmd3	Psmd6	Psmd7	Psmd8
MMU-174154	APC/C:Cdc20 mediated degradation of Securin	14	61	7.69e-16	ENSMUSP00000017365	ENSMUSP00000017572	ENSMUSP00000021049	ENSMUSP00000021063	ENSMUSP00000021595	ENSMUSP00000022256	ENSMUSP00000022380	ENSMUSP00000026560	ENSMUSP00000027432	ENSMUSP00000028278	ENSMUSP00000032824	ENSMUSP00000041968	ENSMUSP00000051657	ENSMUSP00000120096	Psmc1	Psmc4	Psmc5	Psmc6	Psmd1	Psmd11	Psmd12	Psmd13	Psmd14	Psmd3	Psmd6	Psmd7	Psmd8	Uba52
MMU-5658442	Regulation of RAS by GAPs	14	61	7.69e-16	ENSMUSP00000017365	ENSMUSP00000017572	ENSMUSP00000021049	ENSMUSP00000021063	ENSMUSP00000021595	ENSMUSP00000022256	ENSMUSP00000022380	ENSMUSP00000026560	ENSMUSP00000027432	ENSMUSP00000028278	ENSMUSP00000032824	ENSMUSP00000041968	ENSMUSP00000051657	ENSMUSP00000120096	Psmc1	Psmc4	Psmc5	Psmc6	Psmd1	Psmd11	Psmd12	Psmd13	Psmd14	Psmd3	Psmd6	Psmd7	Psmd8	Uba52
MMU-1236975	Antigen processing-Cross presentation	15	80	7.72e-16	ENSMUSP00000003912	ENSMUSP00000017365	ENSMUSP00000017572	ENSMUSP00000021049	ENSMUSP00000021063	ENSMUSP00000021595	ENSMUSP00000022256	ENSMUSP00000022380	ENSMUSP00000026560	ENSMUSP00000027432	ENSMUSP00000028278	ENSMUSP00000028683	ENSMUSP00000032824	ENSMUSP00000041968	ENSMUSP00000051657	Calr	Pdia3	Psmc1	Psmc4	Psmc5	Psmc6	Psmd1	Psmd11	Psmd12	Psmd13	Psmd14	Psmd3	Psmd6	Psmd7	Psmd8
MMU-8939236	RUNX1 regulates transcription of genes involved in differentiation of HSCs	14	62	8.52e-16	ENSMUSP00000017365	ENSMUSP00000017572	ENSMUSP00000021049	ENSMUSP00000021063	ENSMUSP00000021595	ENSMUSP00000022256	ENSMUSP00000022380	ENSMUSP00000026560	ENSMUSP00000027432	ENSMUSP00000028278	ENSMUSP00000032824	ENSMUSP00000041968	ENSMUSP00000051657	ENSMUSP00000120096	Psmc1	Psmc4	Psmc5	Psmc6	Psmd1	Psmd11	Psmd12	Psmd13	Psmd14	Psmd3	Psmd6	Psmd7	Psmd8	Uba52
MMU-1236978	Cross-presentation of soluble exogenous antigens (endosomes)	13	46	8.75e-16	ENSMUSP00000017365	ENSMUSP00000017572	ENSMUSP00000021049	ENSMUSP00000021063	ENSMUSP00000021595	ENSMUSP00000022256	ENSMUSP00000022380	ENSMUSP00000026560	ENSMUSP00000027432	ENSMUSP00000028278	ENSMUSP00000032824	ENSMUSP00000041968	ENSMUSP00000051657	Psmc1	Psmc4	Psmc5	Psmc6	Psmd1	Psmd11	Psmd12	Psmd13	Psmd14	Psmd3	Psmd6	Psmd7	Psmd8
MMU-68949	Orc1 removal from chromatin	14	64	1.21e-15	ENSMUSP00000017365	ENSMUSP00000017572	ENSMUSP00000021049	ENSMUSP00000021063	ENSMUSP00000021595	ENSMUSP00000022256	ENSMUSP00000022380	ENSMUSP00000026560	ENSMUSP00000027432	ENSMUSP00000028278	ENSMUSP00000032824	ENSMUSP00000041968	ENSMUSP00000051657	ENSMUSP00000120096	Psmc1	Psmc4	Psmc5	Psmc6	Psmd1	Psmd11	Psmd12	Psmd13	Psmd14	Psmd3	Psmd6	Psmd7	Psmd8	Uba52
MMU-8948751	Regulation of PTEN stability and activity	14	64	1.21e-15	ENSMUSP00000017365	ENSMUSP00000017572	ENSMUSP00000021049	ENSMUSP00000021063	ENSMUSP00000021595	ENSMUSP00000022256	ENSMUSP00000022380	ENSMUSP00000026560	ENSMUSP00000027432	ENSMUSP00000028278	ENSMUSP00000032824	ENSMUSP00000041968	ENSMUSP00000051657	ENSMUSP00000120096	Psmc1	Psmc4	Psmc5	Psmc6	Psmd1	Psmd11	Psmd12	Psmd13	Psmd14	Psmd3	Psmd6	Psmd7	Psmd8	Uba52
MMU-174178	APC/C:Cdh1 mediated degradation of Cdc20 and other APC/C:Cdh1 targeted proteins in late mitosis/early G1	14	66	1.6e-15	ENSMUSP00000017365	ENSMUSP00000017572	ENSMUSP00000021049	ENSMUSP00000021063	ENSMUSP00000021595	ENSMUSP00000022256	ENSMUSP00000022380	ENSMUSP00000026560	ENSMUSP00000027432	ENSMUSP00000028278	ENSMUSP00000032824	ENSMUSP00000041968	ENSMUSP00000051657	ENSMUSP00000120096	Psmc1	Psmc4	Psmc5	Psmc6	Psmd1	Psmd11	Psmd12	Psmd13	Psmd14	Psmd3	Psmd6	Psmd7	Psmd8	Uba52
MMU-174184	Cdc20:Phospho-APC/C mediated degradation of Cyclin A	14	66	1.6e-15	ENSMUSP00000017365	ENSMUSP00000017572	ENSMUSP00000021049	ENSMUSP00000021063	ENSMUSP00000021595	ENSMUSP00000022256	ENSMUSP00000022380	ENSMUSP00000026560	ENSMUSP00000027432	ENSMUSP00000028278	ENSMUSP00000032824	ENSMUSP00000041968	ENSMUSP00000051657	ENSMUSP00000120096	Psmc1	Psmc4	Psmc5	Psmc6	Psmd1	Psmd11	Psmd12	Psmd13	Psmd14	Psmd3	Psmd6	Psmd7	Psmd8	Uba52
MMU-69017	CDK-mediated phosphorylation and removal of Cdc6	14	66	1.6e-15	ENSMUSP00000017365	ENSMUSP00000017572	ENSMUSP00000021049	ENSMUSP00000021063	ENSMUSP00000021595	ENSMUSP00000022256	ENSMUSP00000022380	ENSMUSP00000026560	ENSMUSP00000027432	ENSMUSP00000028278	ENSMUSP00000032824	ENSMUSP00000041968	ENSMUSP00000051657	ENSMUSP00000120096	Psmc1	Psmc4	Psmc5	Psmc6	Psmd1	Psmd11	Psmd12	Psmd13	Psmd14	Psmd3	Psmd6	Psmd7	Psmd8	Uba52
MMU-8852276	The role of GTSE1 in G2/M progression after G2 checkpoint	14	68	2.1e-15	ENSMUSP00000017365	ENSMUSP00000017572	ENSMUSP00000021049	ENSMUSP00000021063	ENSMUSP00000021595	ENSMUSP00000022256	ENSMUSP00000022380	ENSMUSP00000026560	ENSMUSP00000027432	ENSMUSP00000028278	ENSMUSP00000032824	ENSMUSP00000041968	ENSMUSP00000051657	ENSMUSP00000120096	Psmc1	Psmc4	Psmc5	Psmc6	Psmd1	Psmd11	Psmd12	Psmd13	Psmd14	Psmd3	Psmd6	Psmd7	Psmd8	Uba52
MMU-382556	ABC-family proteins mediated transport	15	91	3.19e-15	ENSMUSP00000017365	ENSMUSP00000017572	ENSMUSP00000021049	ENSMUSP00000021063	ENSMUSP00000021595	ENSMUSP00000022256	ENSMUSP00000022380	ENSMUSP00000026560	ENSMUSP00000027432	ENSMUSP00000028278	ENSMUSP00000032824	ENSMUSP00000034588	ENSMUSP00000041968	ENSMUSP00000051657	ENSMUSP00000120096	Apoa1	Psmc1	Psmc4	Psmc5	Psmc6	Psmd1	Psmd11	Psmd12	Psmd13	Psmd14	Psmd3	Psmd6	Psmd7	Psmd8	Uba52
MMU-195253	Degradation of beta-catenin by the destruction complex	14	72	3.95e-15	ENSMUSP00000017365	ENSMUSP00000017572	ENSMUSP00000021049	ENSMUSP00000021063	ENSMUSP00000021595	ENSMUSP00000022256	ENSMUSP00000022380	ENSMUSP00000026560	ENSMUSP00000027432	ENSMUSP00000028278	ENSMUSP00000032824	ENSMUSP00000041968	ENSMUSP00000051657	ENSMUSP00000120096	Psmc1	Psmc4	Psmc5	Psmc6	Psmd1	Psmd11	Psmd12	Psmd13	Psmd14	Psmd3	Psmd6	Psmd7	Psmd8	Uba52
MMU-2871837	FCERI mediated NF-kB activation	14	72	3.95e-15	ENSMUSP00000017365	ENSMUSP00000017572	ENSMUSP00000021049	ENSMUSP00000021063	ENSMUSP00000021595	ENSMUSP00000022256	ENSMUSP00000022380	ENSMUSP00000026560	ENSMUSP00000027432	ENSMUSP00000028278	ENSMUSP00000032824	ENSMUSP00000041968	ENSMUSP00000051657	ENSMUSP00000120096	Psmc1	Psmc4	Psmc5	Psmc6	Psmd1	Psmd11	Psmd12	Psmd13	Psmd14	Psmd3	Psmd6	Psmd7	Psmd8	Uba52
MMU-5689603	UCH proteinases	14	80	1.37e-14	ENSMUSP00000017365	ENSMUSP00000017572	ENSMUSP00000021049	ENSMUSP00000021063	ENSMUSP00000021595	ENSMUSP00000022256	ENSMUSP00000022380	ENSMUSP00000026560	ENSMUSP00000027432	ENSMUSP00000028278	ENSMUSP00000032824	ENSMUSP00000041968	ENSMUSP00000051657	ENSMUSP00000120096	Psmc1	Psmc4	Psmc5	Psmc6	Psmd1	Psmd11	Psmd12	Psmd13	Psmd14	Psmd3	Psmd6	Psmd7	Psmd8	Uba52
MMU-202424	Downstream TCR signaling	14	81	1.58e-14	ENSMUSP00000017365	ENSMUSP00000017572	ENSMUSP00000021049	ENSMUSP00000021063	ENSMUSP00000021595	ENSMUSP00000022256	ENSMUSP00000022380	ENSMUSP00000026560	ENSMUSP00000027432	ENSMUSP00000028278	ENSMUSP00000032824	ENSMUSP00000041968	ENSMUSP00000051657	ENSMUSP00000120096	Psmc1	Psmc4	Psmc5	Psmc6	Psmd1	Psmd11	Psmd12	Psmd13	Psmd14	Psmd3	Psmd6	Psmd7	Psmd8	Uba52
MMU-9020702	Interleukin-1 signaling	14	86	3.09e-14	ENSMUSP00000017365	ENSMUSP00000017572	ENSMUSP00000021049	ENSMUSP00000021063	ENSMUSP00000021595	ENSMUSP00000022256	ENSMUSP00000022380	ENSMUSP00000026560	ENSMUSP00000027432	ENSMUSP00000028278	ENSMUSP00000032824	ENSMUSP00000041968	ENSMUSP00000051657	ENSMUSP00000120096	Psmc1	Psmc4	Psmc5	Psmc6	Psmd1	Psmd11	Psmd12	Psmd13	Psmd14	Psmd3	Psmd6	Psmd7	Psmd8	Uba52
MMU-453279	Mitotic G1-G1/S phases	15	120	1.05e-13	ENSMUSP00000017365	ENSMUSP00000017572	ENSMUSP00000021049	ENSMUSP00000021063	ENSMUSP00000021595	ENSMUSP00000022256	ENSMUSP00000022380	ENSMUSP00000026560	ENSMUSP00000027432	ENSMUSP00000028278	ENSMUSP00000032824	ENSMUSP00000041968	ENSMUSP00000051657	ENSMUSP00000086640	ENSMUSP00000120096	Ppp2r2a	Psmc1	Psmc4	Psmc5	Psmc6	Psmd1	Psmd11	Psmd12	Psmd13	Psmd14	Psmd3	Psmd6	Psmd7	Psmd8	Uba52
MMU-5632684	Hedgehog 'on' state	14	105	3.32e-13	ENSMUSP00000017365	ENSMUSP00000017572	ENSMUSP00000021049	ENSMUSP00000021063	ENSMUSP00000021595	ENSMUSP00000022256	ENSMUSP00000022380	ENSMUSP00000026560	ENSMUSP00000027432	ENSMUSP00000028278	ENSMUSP00000032824	ENSMUSP00000041968	ENSMUSP00000051657	ENSMUSP00000120096	Psmc1	Psmc4	Psmc5	Psmc6	Psmd1	Psmd11	Psmd12	Psmd13	Psmd14	Psmd3	Psmd6	Psmd7	Psmd8	Uba52
MMU-2467813	Separation of Sister Chromatids	16	169	6.52e-13	ENSMUSP00000017365	ENSMUSP00000017572	ENSMUSP00000021049	ENSMUSP00000021063	ENSMUSP00000021595	ENSMUSP00000022256	ENSMUSP00000022380	ENSMUSP00000026560	ENSMUSP00000027432	ENSMUSP00000028278	ENSMUSP00000032824	ENSMUSP00000041968	ENSMUSP00000051657	ENSMUSP00000099933	ENSMUSP00000120096	ENSMUSP00000132102	Psmc1	Psmc4	Psmc5	Psmc6	Psmd1	Psmd11	Psmd12	Psmd13	Psmd14	Psmd3	Psmd6	Psmd7	Psmd8	Rps27	Uba52	Xpo1
MMU-69275	G2/M Transition	16	169	6.52e-13	ENSMUSP00000017365	ENSMUSP00000017572	ENSMUSP00000021049	ENSMUSP00000021063	ENSMUSP00000021595	ENSMUSP00000022256	ENSMUSP00000022380	ENSMUSP00000026560	ENSMUSP00000027432	ENSMUSP00000028278	ENSMUSP00000032824	ENSMUSP00000041968	ENSMUSP00000051657	ENSMUSP00000086640	ENSMUSP00000099933	ENSMUSP00000120096	Ppp2r2a	Psmc1	Psmc4	Psmc5	Psmc6	Psmd1	Psmd11	Psmd12	Psmd13	Psmd14	Psmd3	Psmd6	Psmd7	Psmd8	Uba52	Xpo1
MMU-69481	G2/M Checkpoints	14	128	3.56e-12	ENSMUSP00000017365	ENSMUSP00000017572	ENSMUSP00000021049	ENSMUSP00000021063	ENSMUSP00000021595	ENSMUSP00000022256	ENSMUSP00000022380	ENSMUSP00000026560	ENSMUSP00000027432	ENSMUSP00000028278	ENSMUSP00000032824	ENSMUSP00000041968	ENSMUSP00000051657	ENSMUSP00000120096	Psmc1	Psmc4	Psmc5	Psmc6	Psmd1	Psmd11	Psmd12	Psmd13	Psmd14	Psmd3	Psmd6	Psmd7	Psmd8	Uba52
MMU-8951664	Neddylation	17	230	4.24e-12	ENSMUSP00000017365	ENSMUSP00000017572	ENSMUSP00000019638	ENSMUSP00000021049	ENSMUSP00000021063	ENSMUSP00000021595	ENSMUSP00000022256	ENSMUSP00000022380	ENSMUSP00000026560	ENSMUSP00000027050	ENSMUSP00000027432	ENSMUSP00000028278	ENSMUSP00000032824	ENSMUSP00000041968	ENSMUSP00000048416	ENSMUSP00000051657	ENSMUSP00000120096	Cops4	Cops5	Cops6	Psmc1	Psmc4	Psmc5	Psmc6	Psmd1	Psmd11	Psmd12	Psmd13	Psmd14	Psmd3	Psmd6	Psmd7	Psmd8	Uba52
MMU-201681	TCF dependent signaling in response to WNT	15	166	6.59e-12	ENSMUSP00000017365	ENSMUSP00000017572	ENSMUSP00000021049	ENSMUSP00000021063	ENSMUSP00000021595	ENSMUSP00000022256	ENSMUSP00000022380	ENSMUSP00000026560	ENSMUSP00000027432	ENSMUSP00000028278	ENSMUSP00000032824	ENSMUSP00000041968	ENSMUSP00000051657	ENSMUSP00000099933	ENSMUSP00000120096	Psmc1	Psmc4	Psmc5	Psmc6	Psmd1	Psmd11	Psmd12	Psmd13	Psmd14	Psmd3	Psmd6	Psmd7	Psmd8	Uba52	Xpo1
MMU-71291	Metabolism of amino acids and derivatives	16	228	4.06e-11	ENSMUSP00000003947	ENSMUSP00000017365	ENSMUSP00000017572	ENSMUSP00000021049	ENSMUSP00000021063	ENSMUSP00000021595	ENSMUSP00000022256	ENSMUSP00000022380	ENSMUSP00000026560	ENSMUSP00000027432	ENSMUSP00000028278	ENSMUSP00000032824	ENSMUSP00000033157	ENSMUSP00000041968	ENSMUSP00000051657	ENSMUSP00000078132	Ndufab1	Nmral1	Nqo1	Psmc1	Psmc4	Psmc5	Psmc6	Psmd1	Psmd11	Psmd12	Psmd13	Psmd14	Psmd3	Psmd6	Psmd7	Psmd8
MMU-5689880	Ub-specific processing proteases	14	157	4.28e-11	ENSMUSP00000017365	ENSMUSP00000017572	ENSMUSP00000021049	ENSMUSP00000021063	ENSMUSP00000021595	ENSMUSP00000022256	ENSMUSP00000022380	ENSMUSP00000026560	ENSMUSP00000027432	ENSMUSP00000028278	ENSMUSP00000032824	ENSMUSP00000041968	ENSMUSP00000051657	ENSMUSP00000120096	Psmc1	Psmc4	Psmc5	Psmc6	Psmd1	Psmd11	Psmd12	Psmd13	Psmd14	Psmd3	Psmd6	Psmd7	Psmd8	Uba52
MMU-69620	Cell Cycle Checkpoints	16	240	8.22e-11	ENSMUSP00000017365	ENSMUSP00000017572	ENSMUSP00000021049	ENSMUSP00000021063	ENSMUSP00000021595	ENSMUSP00000022256	ENSMUSP00000022380	ENSMUSP00000026560	ENSMUSP00000027432	ENSMUSP00000028278	ENSMUSP00000032824	ENSMUSP00000041968	ENSMUSP00000051657	ENSMUSP00000099933	ENSMUSP00000120096	ENSMUSP00000132102	Psmc1	Psmc4	Psmc5	Psmc6	Psmd1	Psmd11	Psmd12	Psmd13	Psmd14	Psmd3	Psmd6	Psmd7	Psmd8	Rps27	Uba52	Xpo1
MMU-1430728	Metabolism	37	1685	7.04e-10	ENSMUSP00000003947	ENSMUSP00000005647	ENSMUSP00000013737	ENSMUSP00000017365	ENSMUSP00000017572	ENSMUSP00000021049	ENSMUSP00000021063	ENSMUSP00000021595	ENSMUSP00000022256	ENSMUSP00000022380	ENSMUSP00000022980	ENSMUSP00000023085	ENSMUSP00000026222	ENSMUSP00000026560	ENSMUSP00000027111	ENSMUSP00000027432	ENSMUSP00000027478	ENSMUSP00000028278	ENSMUSP00000032824	ENSMUSP00000033157	ENSMUSP00000034588	ENSMUSP00000041968	ENSMUSP00000042967	ENSMUSP00000043543	ENSMUSP00000051657	ENSMUSP00000057543	ENSMUSP00000065352	ENSMUSP00000074600	ENSMUSP00000078132	ENSMUSP00000085523	ENSMUSP00000101003	ENSMUSP00000105796	ENSMUSP00000114304	ENSMUSP00000114705	ENSMUSP00000120096	ENSMUSP00000121557	ENSMUSP00000136313	Aldh1l1	Apoa1	Dbi	Gnai2	Ndufa10	Ndufa12	Ndufa13	Ndufa6
MMU-983169	Class I MHC mediated antigen processing & presentation	17	344	1.51e-09	ENSMUSP00000003912	ENSMUSP00000017365	ENSMUSP00000017572	ENSMUSP00000021049	ENSMUSP00000021063	ENSMUSP00000021595	ENSMUSP00000022256	ENSMUSP00000022380	ENSMUSP00000026292	ENSMUSP00000026560	ENSMUSP00000027432	ENSMUSP00000028278	ENSMUSP00000028683	ENSMUSP00000032824	ENSMUSP00000041968	ENSMUSP00000051657	ENSMUSP00000120096	Calr	Huwe1	Pdia3	Psmc1	Psmc4	Psmc5	Psmc6	Psmd1	Psmd11	Psmd12	Psmd13	Psmd14	Psmd3	Psmd6	Psmd7	Psmd8	Uba52
MMU-449147	Signaling by Interleukins	15	262	2.48e-09	ENSMUSP00000017365	ENSMUSP00000017572	ENSMUSP00000021049	ENSMUSP00000021063	ENSMUSP00000021595	ENSMUSP00000022256	ENSMUSP00000022380	ENSMUSP00000026560	ENSMUSP00000027432	ENSMUSP00000028278	ENSMUSP00000032824	ENSMUSP00000041968	ENSMUSP00000051657	ENSMUSP00000100026	ENSMUSP00000120096	Cntfr	Psmc1	Psmc4	Psmc5	Psmc6	Psmd1	Psmd11	Psmd12	Psmd13	Psmd14	Psmd3	Psmd6	Psmd7	Psmd8	Uba52
MMU-983168	Antigen processing: Ubiquitination & Proteasome degradation	15	295	1.12e-08	ENSMUSP00000017365	ENSMUSP00000017572	ENSMUSP00000021049	ENSMUSP00000021063	ENSMUSP00000021595	ENSMUSP00000022256	ENSMUSP00000022380	ENSMUSP00000026292	ENSMUSP00000026560	ENSMUSP00000027432	ENSMUSP00000028278	ENSMUSP00000032824	ENSMUSP00000041968	ENSMUSP00000051657	ENSMUSP00000120096	Huwe1	Psmc1	Psmc4	Psmc5	Psmc6	Psmd1	Psmd11	Psmd12	Psmd13	Psmd14	Psmd3	Psmd6	Psmd7	Psmd8	Uba52
MMU-597592	Post-translational protein modification	29	1211	1.34e-08	ENSMUSP00000003912	ENSMUSP00000017365	ENSMUSP00000017572	ENSMUSP00000019638	ENSMUSP00000021049	ENSMUSP00000021063	ENSMUSP00000021595	ENSMUSP00000022256	ENSMUSP00000022380	ENSMUSP00000025645	ENSMUSP00000026560	ENSMUSP00000027050	ENSMUSP00000027432	ENSMUSP00000028278	ENSMUSP00000028681	ENSMUSP00000028683	ENSMUSP00000028826	ENSMUSP00000031779	ENSMUSP00000032824	ENSMUSP00000034588	ENSMUSP00000036696	ENSMUSP00000041968	ENSMUSP00000048416	ENSMUSP00000051657	ENSMUSP00000068971	ENSMUSP00000092502	ENSMUSP00000120096	ENSMUSP00000120904	ENSMUSP00000140250	Apoa1	Calr	Calu	Chgb	Cops4	Cops5	Cops6	F2	Gmds	Nop58	Pdia3	Psmc1	Psmc4	Psmc5	Psmc6	Psmd1
MMU-2262752	Cellular responses to stress	15	327	4.1e-08	ENSMUSP00000007012	ENSMUSP00000017365	ENSMUSP00000017572	ENSMUSP00000021049	ENSMUSP00000021063	ENSMUSP00000021595	ENSMUSP00000022256	ENSMUSP00000022380	ENSMUSP00000026560	ENSMUSP00000027432	ENSMUSP00000028278	ENSMUSP00000032824	ENSMUSP00000041968	ENSMUSP00000051657	ENSMUSP00000120096	Psmc1	Psmc4	Psmc5	Psmc6	Psmd1	Psmd11	Psmd12	Psmd13	Psmd14	Psmd3	Psmd6	Psmd7	Psmd8	Sod2	Uba52
MMU-69278	Cell Cycle Mitotic	17	435	4.1e-08	ENSMUSP00000017365	ENSMUSP00000017572	ENSMUSP00000021049	ENSMUSP00000021063	ENSMUSP00000021595	ENSMUSP00000022256	ENSMUSP00000022380	ENSMUSP00000026560	ENSMUSP00000027432	ENSMUSP00000028278	ENSMUSP00000032824	ENSMUSP00000041968	ENSMUSP00000051657	ENSMUSP00000086640	ENSMUSP00000099933	ENSMUSP00000120096	ENSMUSP00000132102	Ppp2r2a	Psmc1	Psmc4	Psmc5	Psmc6	Psmd1	Psmd11	Psmd12	Psmd13	Psmd14	Psmd3	Psmd6	Psmd7	Psmd8	Rps27	Uba52	Xpo1
MMU-1640170	Cell Cycle	18	496	4.4e-08	ENSMUSP00000017365	ENSMUSP00000017572	ENSMUSP00000021049	ENSMUSP00000021063	ENSMUSP00000021595	ENSMUSP00000022256	ENSMUSP00000022380	ENSMUSP00000026560	ENSMUSP00000027432	ENSMUSP00000028278	ENSMUSP00000032824	ENSMUSP00000033776	ENSMUSP00000041968	ENSMUSP00000051657	ENSMUSP00000086640	ENSMUSP00000099933	ENSMUSP00000120096	ENSMUSP00000132102	Dkc1	Ppp2r2a	Psmc1	Psmc4	Psmc5	Psmc6	Psmd1	Psmd11	Psmd12	Psmd13	Psmd14	Psmd3	Psmd6	Psmd7	Psmd8	Rps27	Uba52	Xpo1
MMU-382551	Transport of small molecules	16	624	2.39e-05	ENSMUSP00000017365	ENSMUSP00000017572	ENSMUSP00000021049	ENSMUSP00000021063	ENSMUSP00000021595	ENSMUSP00000022256	ENSMUSP00000022380	ENSMUSP00000026560	ENSMUSP00000027432	ENSMUSP00000028278	ENSMUSP00000032203	ENSMUSP00000032824	ENSMUSP00000034588	ENSMUSP00000041968	ENSMUSP00000051657	ENSMUSP00000120096	A2m	Apoa1	Psmc1	Psmc4	Psmc5	Psmc6	Psmd1	Psmd11	Psmd12	Psmd13	Psmd14	Psmd3	Psmd6	Psmd7	Psmd8	Uba52
MMU-532668	N-glycan trimming in the ER and Calnexin/Calreticulin cycle	4	30	0.00026	ENSMUSP00000003912	ENSMUSP00000021595	ENSMUSP00000028683	ENSMUSP00000120096	Calr	Pdia3	Psmc1	Uba52
MMU-5696394	DNA Damage Recognition in GG-NER	4	32	0.00032	ENSMUSP00000019638	ENSMUSP00000027050	ENSMUSP00000048416	ENSMUSP00000120096	Cops4	Cops5	Cops6	Uba52
MMU-381426	Regulation of Insulin-like Growth Factor (IGF) transport and uptake by Insulin-like Growth Factor Binding Proteins (IGFBPs)	6	129	0.001	ENSMUSP00000025645	ENSMUSP00000028681	ENSMUSP00000028826	ENSMUSP00000031779	ENSMUSP00000034588	ENSMUSP00000068971	Apoa1	Calu	Chgb	F2	Serpinc1	Tmem132a
MMU-168249	Innate Immune System	16	879	0.0012	ENSMUSP00000017365	ENSMUSP00000017572	ENSMUSP00000021049	ENSMUSP00000021063	ENSMUSP00000021595	ENSMUSP00000022256	ENSMUSP00000022380	ENSMUSP00000026292	ENSMUSP00000026560	ENSMUSP00000027432	ENSMUSP00000028278	ENSMUSP00000028681	ENSMUSP00000032824	ENSMUSP00000041968	ENSMUSP00000051657	ENSMUSP00000120096	F2	Huwe1	Psmc1	Psmc4	Psmc5	Psmc6	Psmd1	Psmd11	Psmd12	Psmd13	Psmd14	Psmd3	Psmd6	Psmd7	Psmd8	Uba52
MMU-6781823	Formation of TC-NER Pre-Incision Complex	4	47	0.0012	ENSMUSP00000019638	ENSMUSP00000027050	ENSMUSP00000048416	ENSMUSP00000120096	Cops4	Cops5	Cops6	Uba52
MMU-140837	Intrinsic Pathway of Fibrin Clot Formation	3	20	0.0015	ENSMUSP00000028681	ENSMUSP00000032203	ENSMUSP00000068971	A2m	F2	Serpinc1
MMU-901042	Calnexin/calreticulin cycle	3	21	0.0017	ENSMUSP00000003912	ENSMUSP00000028683	ENSMUSP00000120096	Calr	Pdia3	Uba52
MMU-8957275	Post-translational protein phosphorylation	5	114	0.0039	ENSMUSP00000025645	ENSMUSP00000028826	ENSMUSP00000031779	ENSMUSP00000034588	ENSMUSP00000068971	Apoa1	Calu	Chgb	Serpinc1	Tmem132a
MMU-8963896	HDL assembly	2	7	0.0048	ENSMUSP00000032203	ENSMUSP00000034588	A2m	Apoa1
MMU-3000480	Scavenging by Class A Receptors	2	9	0.0071	ENSMUSP00000003912	ENSMUSP00000034588	Apoa1	Calr
MMU-8856825	Cargo recognition for clathrin-mediated endocytosis	4	85	0.0092	ENSMUSP00000019638	ENSMUSP00000027050	ENSMUSP00000048416	ENSMUSP00000120096	Cops4	Cops5	Cops6	Uba52
MMU-6798695	Neutrophil degranulation	9	476	0.0167	ENSMUSP00000017365	ENSMUSP00000017572	ENSMUSP00000021063	ENSMUSP00000022256	ENSMUSP00000026292	ENSMUSP00000026560	ENSMUSP00000027432	ENSMUSP00000028278	ENSMUSP00000041968	Huwe1	Psmd1	Psmd11	Psmd12	Psmd13	Psmd14	Psmd3	Psmd6	Psmd7
MMU-168256	Immune System	19	1523	0.0228	ENSMUSP00000003912	ENSMUSP00000017365	ENSMUSP00000017572	ENSMUSP00000021049	ENSMUSP00000021063	ENSMUSP00000021595	ENSMUSP00000022256	ENSMUSP00000022380	ENSMUSP00000026292	ENSMUSP00000026560	ENSMUSP00000027432	ENSMUSP00000028278	ENSMUSP00000028681	ENSMUSP00000028683	ENSMUSP00000032824	ENSMUSP00000041968	ENSMUSP00000051657	ENSMUSP00000100026	ENSMUSP00000120096	Calr	Cntfr	F2	Huwe1	Pdia3	Psmc1	Psmc4	Psmc5	Psmc6	Psmd1	Psmd11	Psmd12	Psmd13	Psmd14	Psmd3	Psmd6	Psmd7	Psmd8	Uba52
MMU-140875	Common Pathway of Fibrin Clot Formation	2	20	0.0269	ENSMUSP00000028681	ENSMUSP00000068971	F2	Serpinc1
MMU-5689901	Metalloprotease DUBs	2	21	0.0292	ENSMUSP00000028278	ENSMUSP00000120096	Psmd14	Uba52
MMU-446203	Asparagine N-linked glycosylation	6	269	0.0308	ENSMUSP00000003912	ENSMUSP00000021595	ENSMUSP00000028683	ENSMUSP00000036696	ENSMUSP00000120096	ENSMUSP00000120904	Calr	Gmds	Pdia3	Psmc1	Tmed7	Uba52
MMU-69273	Cyclin A/B1/B2 associated events during G2/M transition	2	23	0.0339	ENSMUSP00000086640	ENSMUSP00000099933	Ppp2r2a	Xpo1
MMU-1236974	ER-Phagosome pathway	2	26	0.0418	ENSMUSP00000003912	ENSMUSP00000028683	Calr	Pdia3
[truncated: 65 more columns]

## Sheet: CTD-ETDC
Pathway	Pathway ID	P-value	Corrected P-value	Annotated Genes Quantity	Annotated Genes	Genome Frequency
Immune System	REACT:R-HSA-168256	5.59e-63	8.48e-60	113	ACTG1|AGO3|AKT1|ALDOC|ANXA2|APAF1|ATG12|ATP6V0B|ATP6V0C|ATP6V1C1|BAD|BCL2|BCL2L1|CALM1|CALM2|CAMP|CASP1|CASP3|CASP8|CASP9|CAT|CCL19|CCL2|CCND1|CD34|CDKN1A|CEBPD|CEP290|CLU|CREB1|CTSL|CXCL10|CXCL8|DNM2|EEF1A1|EIF4G2|ELK1|FASLG|FGFR3|FOS|GM2A|GRB2|GSK3B|GSTP1|HMOX1|HSP90AA1|HSP90AB1|HSPA1B|HSPA5|HSPA8|IFNG|IL1B|IL2|IRS2|ITGAM|ITPR1|JUN|KIT|LIFR|LRRC41|MAP2K1|MAP2K6|MAPK1|MAPK3|MCL1|MDM2|MEF2C|MTOR|…	2118/43622 genes: 4,86%
Signal Transduction	REACT:R-HSA-162582	1.18e-59	1.79e-56	119	ACTG1|ADORA1|AGO3|AKT1|AR|ATP6V0B|ATP6V0C|ATP6V1C1|BAD|BCL2L11|BMP2|CALM1|CALM2|CASP3|CASP8|CASP9|CCL19|CCL21|CCND1|CDC25C|CDK2|CDKN1A|CHRM2|CREB1|CXCL10|CXCL8|DGKI|DLL1|DNM2|DRD2|DRD4|DRD5|E2F1|ELK1|FAS|FASLG|FGFR3|GFAP|GNG5|GNGT2|GPR27|GRB2|GSK3B|H2AC20|H2AC6|H2BC9|HCRTR1|HDAC3|HDAC6|HEY2|HEYL|HNRNPM|HSP90AA1|IGF1|IL2|INHBA|IRS2|ITPR1|JUN|KDR|KISS1|KIT|LAMC2|LIMK2|LRRK2|MAP2K1|MAPK1|MAPK3|MDM2|…	2587/43622 genes: 5,93%
Pathways in cancer	KEGG:hsa05200	1.63e-57	2.48e-54	59	AKT1|AR|ARNT2|BAD|BAX|BCL2|BCL2L1|BID|BMP2|BMP4|CASP3|CASP8|CASP9|CCND1|CDK2|CDKN1A|CDKN2A|CXCL8|CYCS|E2F1|FAS|FASLG|FGFR3|FOS|GNG5|GNGT2|GRB2|GSK3B|GSTP1|HSP90AA1|HSP90AB1|IGF1|JUN|KIT|LAMC2|MAP2K1|MAPK1|MAPK3|MDM2|MTOR|MYC|NFKB1|NFKBIA|NOS2|PDGFRA|PRKACA|PTGS2|RAF1|RB1|RBX1|RELA|ROCK1|STAT3|TGFB1|TP53|TRAF6|VEGFA|WNT1|WNT5A	395/43622 genes: 0,91%
Innate Immune System	REACT:R-HSA-168249	1.94e-54	2.94e-51	86	ACTG1|AGO3|AKT1|ALDOC|ANXA2|APAF1|ATG12|ATP6V0B|ATP6V0C|ATP6V1C1|BAD|BCL2|BCL2L1|CALM1|CALM2|CAMP|CASP1|CASP8|CASP9|CAT|CDKN1A|CEP290|CLU|CREB1|CTSL|DNM2|EEF1A1|ELK1|FGFR3|FOS|GM2A|GRB2|GSK3B|GSTP1|HSP90AA1|HSP90AB1|HSPA1B|HSPA8|IL1B|IL2|IRS2|ITGAM|ITPR1|JUN|KIT|MAP2K1|MAP2K6|MAPK1|MAPK3|MDM2|MEF2C|MTOR|MUC6|NCF1|NFKB1|NFKBIA|NOS2|NR4A1|NRG1|NRTN|PDE1B|PDGFRA|PEBP1|PLAUR|POLR1C|POLR2K|PRKACA|PSAP…	1298/43622 genes: 2,98%
Cellular responses to stress	REACT:R-HSA-2262752	2.7e-51	4.1e-48	57	AGO3|ATG12|BECN1|CAT|CDK2|CDKN1A|CDKN2A|CXCL8|CYCS|DNAJB6|E2F1|EEF1A1|FKBP4|FOS|GPX1|GSK3B|GSR|GSTP1|H2AC20|H2AC6|H2BC9|HDAC6|HMGA2|HSF1|HSP90AA1|HSP90AB1|HSPA1B|HSPA5|HSPA8|JUN|MAP2K6|MAPK1|MAPK3|MDM2|MDM4|MTOR|NCF1|NFKB1|NOX4|PRDX1|PRDX2|PRDX3|PSMB1|PSMC4|RB1|RBX1|RELA|RPS6KA2|SIRT1|SOD1|SOD2|STAT3|TP53|TXNRD1|UBB|UBC|VEGFA	451/43622 genes: 1,03%
Apoptosis	KEGG:hsa04210	4.64e-48	7.04e-45	38	ACTG1|AKT1|APAF1|BAD|BAK1|BAX|BBC3|BCL2|BCL2A1|BCL2L1|BCL2L11|BID|CASP3|CASP7|CASP8|CASP9|CTSL|CYCS|FAS|FASLG|FOS|GADD45A|ITPR1|JUN|MAP2K1|MAPK1|MAPK3|MCL1|NFKB1|NFKBIA|PMAIP1|RAF1|RELA|RIPK1|TNF|TP53|TUBA1A|TUBA1B	138/43622 genes: 0,32%
Signaling by Interleukins	REACT:R-HSA-449147	4.25e-46	6.45e-43	56	AKT1|BCL2|BCL2L1|CALM1|CALM2|CASP1|CASP3|CCL19|CCL2|CCND1|CDKN1A|CEBPD|CXCL10|CXCL8|FASLG|FGFR3|FOS|GRB2|HMOX1|HSP90AA1|HSPA8|IL1B|IL2|IRS2|ITGAM|KIT|LIFR|MAP2K1|MAP2K6|MAPK1|MAPK3|MCL1|MYC|NFKB1|NOS2|NRG1|NRTN|PDGFRA|PEBP1|PRKACA|PSMB1|PSMC4|PTGS2|PTK2B|RAF1|RBX1|RELA|STAT3|TEK|TGFB1|TNF|TP53|TRAF6|UBB|UBC|VEGFA	528/43622 genes: 1,21%
Hepatitis B	KEGG:hsa05161	1.49e-45	2.26e-42	37	AKT1|APAF1|BAD|BAX|BCL2|CASP3|CASP8|CASP9|CCND1|CDK2|CDKN1A|CREB1|CXCL8|CYCS|E2F1|ELK1|FAS|FASLG|FOS|GRB2|JUN|MAP2K1|MAPK1|MAPK3|MYC|NFKB1|NFKBIA|PCNA|PTK2B|RAF1|RB1|RELA|STAT3|STAT4|TGFB1|TNF|TP53	144/43622 genes: 0,33%
Disease	REACT:R-HSA-1643685	4.64e-42	7.05e-39	63	AKT1|ALB|AMN|BAD|BCL2L11|CALM1|CALM2|CASP9|CDC25C|CDK5R1|CDKN1A|CREB1|DLL1|FASLG|FGFR3|GRB2|GSK3B|HDAC3|HDAC6|HEY2|HEYL|HSP90AA1|HSP90AB1|IRS2|JUN|KIT|MACF1|MAP2K1|MAP2K6|MAPK1|MAPK3|MDM2|MTOR|MUC6|MYC|NFKB1|NFKBIA|NR4A1|NRG1|PDGFRA|PEBP1|POLR2K|PRDX1|PRDX2|PSMB1|PSMC4|RAF1|RBX1|RELA|RPL12|RPL19|RPL41|RPL8|RPL9|RPS12|RPS15|RPS27|SOD2|STAT3|TGFB1|TXNRD1|UBB|UBC	860/43622 genes: 1,97%
Cytokine Signaling in Immune system	REACT:R-HSA-1280215	6.81e-42	1.03e-38	60	AKT1|BCL2|BCL2L1|CALM1|CALM2|CASP1|CASP3|CCL19|CCL2|CCND1|CDKN1A|CEBPD|CXCL10|CXCL8|EIF4G2|FASLG|FGFR3|FOS|GRB2|HMOX1|HSP90AA1|HSPA8|IFNG|IL1B|IL2|IRS2|ITGAM|KIT|LIFR|MAP2K1|MAP2K6|MAPK1|MAPK3|MCL1|MYC|NFKB1|NOS2|NRG1|NRTN|PDGFRA|PEBP1|PRKACA|PRL|PSMB1|PSMC4|PTGS2|PTK2B|RAF1|RBX1|RELA|STAT3|SUMO1|TEK|TGFB1|TNF|TP53|TRAF6|UBB|UBC|VEGFA	760/43622 genes: 1,74%
PI3K-Akt signaling pathway	KEGG:hsa04151	5.09e-40	7.73e-37	44	AKT1|BAD|BCL2|BCL2L1|BCL2L11|CASP9|CCND1|CCND2|CDK2|CDKN1A|CHRM2|CREB1|DDIT4|FASLG|FGFR3|GNG5|GNGT2|GRB2|GSK3B|HSP90AA1|HSP90AB1|IGF1|IL2|ITGB8|KDR|KIT|LAMC2|MAP2K1|MAPK1|MAPK3|MCL1|MDM2|MTOR|MYC|NFKB1|NR4A1|PDGFRA|PRL|RAF1|RELA|TEK|TNR|TP53|VEGFA	341/43622 genes: 0,78%
Signalling by NGF	REACT:R-HSA-166520	1.17e-39	1.77e-36	49	AGO3|AKT1|BAD|BCL2L11|CALM1|CALM2|CASP3|CASP9|CDKN1A|CREB1|DNM2|ELK1|FGFR3|GRB2|GSK3B|HDAC3|IL2|IRS2|ITPR1|KIT|MAP2K1|MAPK1|MAPK3|MDM2|MEF2C|MTOR|NFKB1|NFKBIA|NR4A1|NRG1|NRTN|NTRK2|PDE1B|PDGFRA|PEBP1|PRKACA|PSMB1|PSMC4|RAF1|RBX1|RELA|RPS6KA2|RTN4|STAT3|TEK|TP53|TRAF6|UBB|UBC	477/43622 genes: 1,09%
Fluid shear stress and atherosclerosis	KEGG:hsa05418	4.11e-39	6.24e-36	33	ACTG1|AKT1|BCL2|BMP4|CALM1|CALM2|CCL2|CTSL|FOS|GSTA3|GSTA4|GSTP1|HMOX1|HSP90AA1|HSP90AB1|IFNG|IL1B|JUN|KDR|KLF2|MAP2K6|MEF2C|NCF1|NFE2L2|NFKB1|NOX1|NQO1|PRKCZ|RELA|SUMO1|TNF|TP53|VEGFA	142/43622 genes: 0,33%
Metabolism	REACT:R-HSA-1430728	1.24e-38	1.89e-35	88	ACADS|ACHE|ACO2|AKT1|ALAS2|ALB|ALDH2|ALDOC|AMN|ARF3|ARNT2|CACNA1E|CALM1|CALM2|CAT|CDIPT|COX5A|COX6A1|COX6B1|COX7A2L|CROT|CYC1|CYCS|CYP1A1|CYP1A2|CYP2E1|DBI|DIO1|DLST|DNM2|ENO1|ENO2|GCLC|GM2A|GNG5|GNGT2|GOT1|GPT|GPX1|GPX4|GSR|GSTA3|GSTA4|GSTP1|GUK1|HDAC3|HK1|HMOX1|HSD11B2|HSP90AA1|HSP90AB1|IDH3A|ITPR1|MBOAT2|MTHFR|NQO1|OAZ2|ODC1|PDHA1|PGS1|PLCE1|PRKACA|PSAP|PSMB1|PSMC4|PTGES|PTGS2|RPL12|RPL19|RPL4…	2172/43622 genes: 4,98%
Prostate cancer	KEGG:hsa05215	7.7e-38	1.17e-34	28	AKT1|AR|BAD|BCL2|CASP9|CCND1|CDK2|CDKN1A|CREB1|E2F1|GRB2|GSK3B|GSTP1|HSP90AA1|HSP90AB1|IGF1|MAP2K1|MAPK1|MAPK3|MDM2|MTOR|NFKB1|NFKBIA|PDGFRA|RAF1|RB1|RELA|TP53	87/43622 genes: 0,20%
Platinum drug resistance	KEGG:hsa01524	1.06e-34	1.61e-31	25	AKT1|APAF1|BAD|BAK1|BAX|BBC3|BCL2|BCL2L1|BID|CASP3|CASP8|CASP9|CDKN1A|CDKN2A|CYCS|FAS|FASLG|GSTA3|GSTA4|GSTP1|MAPK1|MAPK3|MDM2|PMAIP1|TP53	73/43622 genes: 0,17%
NGF signalling via TRKA from the plasma membrane	REACT:R-HSA-187037	8.43e-34	1.28e-30	41	AGO3|AKT1|BAD|CALM1|CALM2|CASP9|CDKN1A|CREB1|DNM2|ELK1|FGFR3|GRB2|GSK3B|IL2|IRS2|ITPR1|KIT|MAP2K1|MAPK1|MAPK3|MDM2|MEF2C|MTOR|NR4A1|NRG1|NRTN|NTRK2|PDE1B|PDGFRA|PEBP1|PRKACA|PSMB1|PSMC4|RAF1|RBX1|RPS6KA2|STAT3|TEK|TP53|UBB|UBC	387/43622 genes: 0,89%
Alzheimer's disease	KEGG:hsa05010	3.52e-33	5.34e-30	31	APAF1|APBB1|BAD|BID|CALM1|CALM2|CASP3|CASP7|CASP8|CASP9|CDK5R1|COX5A|COX6A1|COX6B1|COX7A2|COX7A2L|CYC1|CYCS|FAS|GSK3B|IL1B|ITPR1|MAPK1|MAPK3|MAPT|PSEN1|RTN4|SDHB|SNCA|TNF|UQCRC1	171/43622 genes: 0,39%
Gene Expression	REACT:R-HSA-74160	5.74e-33	8.71e-30	75	AGO3|AKT1|APAF1|AR|BAX|BBC3|BID|BNIP3L|BRF1|CASP1|CDC25C|CDK2|CDK5R1|CDKN1A|CDKN2A|COX5A|COX6A1|COX6B1|COX7A2L|CYCS|DDIT4|DDX5|E2F1|EEF1A1|EEF1G|FAS|FOS|GADD45A|GSK3B|GSR|H2AC20|H2AC6|H2BC9|HNRNPK|HNRNPM|HSP90AA1|HSPA8|JUN|KIT|MAP2K6|MAPK3|MBD3|MDM2|MDM4|MTOR|MYC|NFIB|NR3C2|NR4A1|NR4A2|PCNA|PMAIP1|POLR1C|POLR2K|PRDX1|PRDX2|PSMB1|PSMC4|RPL12|RPL19|RPL41|RPL8|RPL9|RPS12|RPS15|RPS27|SERPINE1|SIRT1|S…	1831/43622 genes: 4,20%
MAPK signaling pathway	KEGG:hsa04010	6.23e-33	9.45e-30	35	AKT1|BDNF|CACNA1E|CASP3|ELK1|FAS|FASLG|FGFR3|FOS|GADD45A|GRB2|HSPA1B|HSPA8|IL1B|JUN|MAP2K1|MAP2K6|MAPK1|MAPK3|MAPT|MEF2C|MYC|NFKB1|NR4A1|NTRK2|PDGFRA|PRKACA|RAF1|RELA|RPS6KA2|STMN1|TGFB1|TNF|TP53|TRAF6	255/43622 genes: 0,58%
Developmental Biology	REACT:R-HSA-1266738	1.91e-32	2.9e-29	59	ACTG1|ADAM22|AKT1|CALM1|CALM2|CDK5R1|CEBPD|CREB1|DNM2|EFNB1|FGFR3|GRB2|GSK3B|H2AC20|H2AC6|H2BC9|HDAC3|HSP90AA1|HSP90AB1|HSPA8|IL2|IRS2|JUN|KCNQ2|KDR|KIT|KRT6A|LIMK2|MAP2K1|MAP2K6|MAPK1|MAPK3|MEF2C|NEUROD1|NFKB1|NRG1|NRTN|NTN1|PAX6|PDGFRA|PEBP1|POLR2K|PRKACA|PSMB1|PSMC4|RAF1|RBX1|RELA|ROCK1|RPS6KA2|SEMA4D|STAT3|TEK|TGFB1|TNF|UBB|UBC|VEGFA|WNT1	1076/43622 genes: 2,47%
Proteoglycans in cancer	KEGG:hsa05205	3.56e-32	5.4e-29	32	ACTG1|AKT1|CASP3|CCND1|CDKN1A|CTSL|DDX5|ELK1|FAS|FASLG|GRB2|IGF1|ITPR1|KDR|MAP2K1|MAPK1|MAPK3|MDM2|MTOR|MYC|PLAUR|PLCE1|PRKACA|RAF1|ROCK1|STAT3|TGFB1|TNF|TP53|VEGFA|WNT1|WNT5A	203/43622 genes: 0,47%
Transcriptional Regulation by TP53	REACT:R-HSA-3700989	4.24e-32	6.43e-29	39	AGO3|AKT1|APAF1|BAX|BBC3|BID|BNIP3L|CASP1|CDC25C|CDK2|CDK5R1|CDKN1A|CDKN2A|COX5A|COX6A1|COX6B1|COX7A2L|CYCS|DDIT4|E2F1|FAS|FOS|GADD45A|GSR|JUN|MAP2K6|MBD3|MDM2|MDM4|MTOR|PCNA|PMAIP1|POLR2K|PRDX1|PRDX2|TP53|TXNRD1|UBB|UBC	370/43622 genes: 0,85%
Fc epsilon receptor (FCERI) signaling	REACT:R-HSA-2454202	9.68e-32	1.47e-28	39	AGO3|AKT1|BAD|CALM1|CALM2|CASP9|CDKN1A|CREB1|FGFR3|FOS|GRB2|GSK3B|IL2|IRS2|ITPR1|JUN|KIT|MAP2K1|MAPK1|MAPK3|MDM2|MTOR|NFKB1|NFKBIA|NR4A1|NRG1|NRTN|PDGFRA|PEBP1|PSMB1|PSMC4|RAF1|RBX1|RELA|TEK|TP53|TRAF6|UBB|UBC	378/43622 genes: 0,87%
Non-alcoholic fatty liver disease (NAFLD)	KEGG:hsa04932	1.56e-30	2.36e-27	28	AKT1|BAX|BCL2L11|BID|CASP3|CASP7|CASP8|COX5A|COX6A1|COX6B1|COX7A2|COX7A2L|CXCL8|CYC1|CYCS|CYP2E1|FAS|FASLG|GSK3B|IL1B|IRS2|JUN|NFKB1|RELA|SDHB|TGFB1|TNF|UQCRC1	149/43622 genes: 0,34%
MicroRNAs in cancer	KEGG:hsa05206	1.77e-30	2.68e-27	35	BAK1|BCL2|BCL2L11|CASP3|CCND1|CCND2|CDC25C|CDKN1A|CDKN2A|DDIT4|E2F1|FGFR3|GRB2|HMGA2|HMOX1|HNRNPK|IRS2|MAP2K1|MAPK1|MCL1|MDM2|MDM4|MTOR|MYC|NFKB1|PDGFRA|PTGS2|RAF1|ROCK1|SIRT1|STAT3|STMN1|TNR|TP53|VEGFA	299/43622 genes: 0,69%
IL-17 signaling pathway	KEGG:hsa04657	6.01e-30	9.12e-27	24	CASP3|CASP8|CCL2|CXCL10|CXCL8|FOS|GSK3B|HSP90AA1|HSP90AB1|IFNG|IL1B|JUN|MAPK1|MAPK15|MAPK3|NFKB1|NFKBIA|PTGS2|RELA|S100A8|S100A9|TNF|TNFAIP3|TRAF6	93/43622 genes: 0,21%
p53 signaling pathway	KEGG:hsa04115	7.26e-30	1.1e-26	22	ADGRB1|APAF1|BAX|BBC3|BID|CASP3|CASP8|CASP9|CCND1|CCND2|CDK2|CDKN1A|CDKN2A|CYCS|FAS|GADD45A|IGF1|MDM2|MDM4|PMAIP1|SERPINE1|TP53	69/43622 genes: 0,16%
Diseases of signal transduction	REACT:R-HSA-5663202	1.17e-29	1.78e-26	37	AKT1|BAD|BCL2L11|CASP9|CDKN1A|CREB1|DLL1|FGFR3|GRB2|GSK3B|HDAC3|HDAC6|HEY2|HEYL|HSP90AA1|IRS2|KIT|MACF1|MAP2K1|MAPK1|MAPK3|MDM2|MTOR|MYC|NR4A1|NRG1|PDGFRA|PEBP1|POLR2K|PSMB1|PSMC4|RAF1|RBX1|STAT3|TGFB1|UBB|UBC	370/43622 genes: 0,85%
Downstream signal transduction	REACT:R-HSA-186763	3.18e-29	4.82e-26	36	AGO3|AKT1|BAD|CALM1|CALM2|CASP9|CDKN1A|CREB1|FGFR3|GRB2|GSK3B|IL2|IRS2|ITPR1|KIT|MAP2K1|MAPK1|MAPK3|MDM2|MTOR|NR4A1|NRG1|NRTN|PDE1B|PDGFRA|PEBP1|PRKACA|PSMB1|PSMC4|RAF1|RBX1|STAT3|TEK|TP53|UBB|UBC	352/43622 genes: 0,81%
Metabolism of proteins	REACT:R-HSA-392499	9.94e-29	1.51e-25	66	ACHE|ACO2|ALPL|AR|ARF3|BECN1|CALM1|CALM2|CCL2|CDKN2A|COPE|CXCL8|CYC1|EEF1A1|EEF1G|GNG5|GNGT2|H2AC20|H2AC6|H2BC9|HDAC3|HNRNPK|HSPA5|HSPA8|IGF1|INHBA|MDM2|MDM4|MFGE8|MUC6|MYC|NFKBIA|PAX6|PCNA|PIGC|PLAUR|PRKN|PRL|PSMB1|PSMC4|RIPK1|RPL12|RPL19|RPL41|RPL8|RPL9|RPS12|RPS15|RPS27|RTN4RL2|SNCA|STAT3|SUMO1|TGFB1|TIMM13|TNFAIP3|TP53|TRAF6|TSHB|TUBA1A|TUBA1B|UBA1|UBB|UBC|UCHL1|UCHL5	1623/43622 genes: 3,72%
Legionellosis	KEGG:hsa05134	1.28e-28	1.95e-25	20	APAF1|BNIP3|CASP1|CASP3|CASP7|CASP8|CASP9|CXCL8|CYCS|EEF1A1|EEF1G|HSF1|HSPA1B|HSPA8|IL1B|ITGAM|NFKB1|NFKBIA|RELA|TNF	55/43622 genes: 0,13%
Tuberculosis	KEGG:hsa05152	2.96e-28	4.49e-25	28	AKT1|APAF1|ATP6V0B|ATP6V0C|BAD|BAX|BCL2|BID|CALM1|CALM2|CAMP|CASP3|CASP8|CASP9|CREB1|CYCS|IFNG|IL1B|ITGAM|MAPK1|MAPK3|NFKB1|NOS2|RAF1|RELA|TGFB1|TNF|TRAF6	178/43622 genes: 0,41%
Signaling by PDGF	REACT:R-HSA-186797	3.28e-28	4.98e-25	36	AGO3|AKT1|BAD|CALM1|CALM2|CASP9|CDKN1A|CREB1|FGFR3|GRB2|GSK3B|IL2|IRS2|ITPR1|KIT|MAP2K1|MAPK1|MAPK3|MDM2|MTOR|NR4A1|NRG1|NRTN|PDE1B|PDGFRA|PEBP1|PRKACA|PSMB1|PSMC4|RAF1|RBX1|STAT3|TEK|TP53|UBB|UBC	376/43622 genes: 0,86%
Endocrine resistance	KEGG:hsa01522	4.89e-28	7.42e-25	23	AKT1|BAD|BAX|BCL2|BIK|CCND1|CDKN1A|CDKN2A|DLL1|E2F1|FOS|GRB2|IGF1|JUN|MAP2K1|MAPK1|MAPK3|MDM2|MTOR|PRKACA|RAF1|RB1|TP53	95/43622 genes: 0,22%
DAP12 signaling	REACT:R-HSA-2424491	7.59e-28	1.15e-24	35	AGO3|AKT1|BAD|CALM1|CALM2|CASP9|CDKN1A|CREB1|FGFR3|GRB2|GSK3B|IL2|IRS2|ITPR1|KIT|MAP2K1|MAPK1|MAPK3|MDM2|MTOR|NR4A1|NRG1|NRTN|PDE1B|PDGFRA|PEBP1|PRKACA|PSMB1|PSMC4|RAF1|RBX1|TEK|TP53|UBB|UBC	356/43622 genes: 0,82%
Interleukin-4 and 13 signaling	REACT:R-HSA-6785807	1.32e-27	2e-24	24	AKT1|BCL2|BCL2L1|CCL2|CCND1|CDKN1A|CEBPD|CXCL8|FASLG|FOS|HMOX1|HSP90AA1|HSPA8|IL1B|ITGAM|MCL1|MYC|NOS2|PTGS2|STAT3|TGFB1|TNF|TP53|VEGFA	114/43622 genes: 0,26%
Signaling by EGFR	REACT:R-HSA-177929	1.63e-27	2.47e-24	35	AGO3|AKT1|BAD|CALM1|CALM2|CASP9|CDKN1A|CREB1|FGFR3|GRB2|GSK3B|IL2|IRS2|ITPR1|KIT|MAP2K1|MAPK1|MAPK3|MDM2|MTOR|NR4A1|NRG1|NRTN|PDE1B|PDGFRA|PEBP1|PRKACA|PSMB1|PSMC4|RAF1|RBX1|TEK|TP53|UBB|UBC	364/43622 genes: 0,83%
HIF-1 signaling pathway	KEGG:hsa04066	2.31e-27	3.51e-24	23	AKT1|BCL2|CDKN1A|ENO1|ENO2|HK1|HMOX1|IFNG|IGF1|MAP2K1|MAPK1|MAPK3|MTOR|NFKB1|NOS2|NOX1|PDHA1|RBX1|RELA|SERPINE1|STAT3|TEK|VEGFA	101/43622 genes: 0,23%
Apoptosis	REACT:R-HSA-109581	2.92e-27	4.44e-24	27	AKT1|APAF1|BAD|BAK1|BAX|BBC3|BCL2|BCL2L1|BCL2L11|BID|CASP3|CASP7|CASP8|CASP9|CYCS|E2F1|FAS|FASLG|MAPT|PMAIP1|PSMB1|PSMC4|RIPK1|ROCK1|TP53|UBB|UBC	172/43622 genes: 0,39%
DAP12 interactions	REACT:R-HSA-2172127	3.12e-27	4.74e-24	35	AGO3|AKT1|BAD|CALM1|CALM2|CASP9|CDKN1A|CREB1|FGFR3|GRB2|GSK3B|IL2|IRS2|ITPR1|KIT|MAP2K1|MAPK1|MAPK3|MDM2|MTOR|NR4A1|NRG1|NRTN|PDE1B|PDGFRA|PEBP1|PRKACA|PSMB1|PSMC4|RAF1|RBX1|TEK|TP53|UBB|UBC	371/43622 genes: 0,85%
Programmed Cell Death	REACT:R-HSA-5357801	4.75e-27	7.21e-24	27	AKT1|APAF1|BAD|BAK1|BAX|BBC3|BCL2|BCL2L1|BCL2L11|BID|CASP3|CASP7|CASP8|CASP9|CYCS|E2F1|FAS|FASLG|MAPT|PMAIP1|PSMB1|PSMC4|RIPK1|ROCK1|TP53|UBB|UBC	175/43622 genes: 0,40%
Intrinsic Pathway for Apoptosis	REACT:R-HSA-109606	5.22e-27	7.92e-24	18	AKT1|APAF1|BAD|BAK1|BAX|BBC3|BCL2|BCL2L1|BCL2L11|BID|CASP3|CASP7|CASP8|CASP9|CYCS|E2F1|PMAIP1|TP53	44/43622 genes: 0,10%
Viral carcinogenesis	KEGG:hsa05203	9.92e-27	1.51e-23	28	BAD|BAK1|BAX|CASP3|CASP8|CCND1|CCND2|CDK2|CDKN1A|CDKN2A|CREB1|GRB2|H2BC9|HDAC3|HDAC6|HNRNPK|JUN|MAPK1|MAPK3|MDM2|NFKB1|NFKBIA|PMAIP1|PRKACA|RB1|RELA|STAT3|TP53	201/43622 genes: 0,46%
Generic Transcription Pathway	REACT:R-HSA-212436	1.79e-26	2.72e-23	48	AGO3|AKT1|APAF1|AR|BAX|BBC3|BID|BNIP3L|CASP1|CDC25C|CDK2|CDK5R1|CDKN1A|CDKN2A|COX5A|COX6A1|COX6B1|COX7A2L|CYCS|DDIT4|E2F1|FAS|FOS|GADD45A|GSR|JUN|KIT|MAP2K6|MBD3|MDM2|MDM4|MTOR|MYC|NR3C2|NR4A1|NR4A2|PCNA|PMAIP1|POLR2K|PRDX1|PRDX2|SERPINE1|SUMO1|TP53|TXNRD1|UBB|UBC|VEGFA	873/43622 genes: 2,00%
Signaling by SCF-KIT	REACT:R-HSA-1433557	2.98e-26	4.52e-23	33	AGO3|AKT1|BAD|CALM1|CALM2|CASP9|CDKN1A|CREB1|FGFR3|GRB2|GSK3B|IL2|IRS2|KIT|MAP2K1|MAPK1|MAPK3|MDM2|MTOR|NR4A1|NRG1|NRTN|PDGFRA|PEBP1|PSMB1|PSMC4|RAF1|RBX1|STAT3|TEK|TP53|UBB|UBC	337/43622 genes: 0,77%
Signaling by the B Cell Receptor (BCR)	REACT:R-HSA-983705	3.79e-26	5.76e-23	29	AGO3|AKT1|BAD|CALM1|CALM2|CASP9|CDKN1A|CREB1|FGFR3|GRB2|GSK3B|IRS2|ITPR1|KIT|MAPK1|MAPK3|MDM2|MTOR|NFKB1|NFKBIA|NR4A1|NRG1|PDGFRA|PSMB1|PSMC4|RELA|TP53|UBB|UBC	234/43622 genes: 0,54%
Toxoplasmosis	KEGG:hsa05145	3.84e-26	5.83e-23	23	AKT1|BAD|BCL2|BCL2L1|CASP3|CASP8|CASP9|CYCS|HSPA1B|HSPA8|IFNG|LAMC2|MAP2K6|MAPK1|MAPK3|NFKB1|NFKBIA|NOS2|RELA|STAT3|TGFB1|TNF|TRAF6	113/43622 genes: 0,26%
Chronic myeloid leukemia	KEGG:hsa05220	5.12e-26	7.78e-23	20	AKT1|BAD|BCL2L1|CCND1|CDKN1A|CDKN2A|E2F1|GRB2|MAP2K1|MAPK1|MAPK3|MDM2|MYC|NFKB1|NFKBIA|RAF1|RB1|RELA|TGFB1|TP53	71/43622 genes: 0,16%
AGE-RAGE signaling pathway in diabetic complications	KEGG:hsa04933	5.72e-26	8.69e-23	22	AKT1|BAX|BCL2|CASP3|CCL2|CCND1|CXCL8|F3|IL1B|JUN|MAPK1|MAPK3|NFKB1|NOX1|PLCE1|PRKCZ|RELA|SERPINE1|STAT3|TGFB1|TNF|VEGFA	99/43622 genes: 0,23%
FoxO signaling pathway	KEGG:hsa04068	5.73e-26	8.69e-23	24	AKT1|ATG12|BCL2L11|BNIP3|CAT|CCND1|CCND2|CDK2|CDKN1A|FASLG|GADD45A|GRB2|IGF1|IRS2|KLF2|MAP2K1|MAPK1|MAPK3|MDM2|RAF1|SIRT1|SOD2|STAT3|TGFB1	132/43622 genes: 0,30%
Axon guidance	REACT:R-HSA-422475	1.31e-25	1.99e-22	39	ACTG1|CALM1|CALM2|CDK5R1|CREB1|DNM2|EFNB1|FGFR3|GRB2|GSK3B|HSP90AA1|HSP90AB1|HSPA8|IL2|IRS2|KCNQ2|KDR|KIT|LIMK2|MAP2K1|MAPK1|MAPK3|NRG1|NRTN|NTN1|PDGFRA|PEBP1|PRKACA|PSMB1|PSMC4|RAF1|RBX1|ROCK1|RPS6KA2|SEMA4D|TEK|UBB|UBC|VEGFA	550/43622 genes: 1,26%
Neurotrophin signaling pathway	KEGG:hsa04722	1.38e-25	2.09e-22	23	AKT1|BAD|BAX|BCL2|BDNF|CALM1|CALM2|FASLG|GRB2|GSK3B|JUN|MAP2K1|MAPK1|MAPK3|NFKB1|NFKBIA|NTRK2|PSEN1|RAF1|RELA|RPS6KA2|TP53|TRAF6	119/43622 genes: 0,27%
VEGFA-VEGFR2 Pathway	REACT:R-HSA-4420097	2.36e-25	3.58e-22	32	AKT1|CALM1|CALM2|FGFR3|GRB2|HSP90AA1|IL2|IRS2|ITPR1|KDR|KIT|MAP2K1|MAPK1|MAPK3|MTOR|NCF1|NRG1|NRTN|PDGFRA|PEBP1|PRKACA|PRKCZ|PSMB1|PSMC4|PTK2B|RAF1|RBX1|ROCK1|TEK|UBB|UBC|VEGFA	330/43622 genes: 0,76%
TNF signaling pathway	KEGG:hsa04668	4.57e-25	6.94e-22	22	AKT1|CASP3|CASP7|CASP8|CCL2|CREB1|CXCL10|FAS|FOS|IL1B|JUN|MAP2K1|MAP2K6|MAPK1|MAPK3|NFKB1|NFKBIA|PTGS2|RELA|RIPK1|TNF|TNFAIP3	108/43622 genes: 0,25%
Signaling by VEGF	REACT:R-HSA-194138	5e-25	7.58e-22	32	AKT1|CALM1|CALM2|FGFR3|GRB2|HSP90AA1|IL2|IRS2|ITPR1|KDR|KIT|MAP2K1|MAPK1|MAPK3|MTOR|NCF1|NRG1|NRTN|PDGFRA|PEBP1|PRKACA|PRKCZ|PSMB1|PSMC4|PTK2B|RAF1|RBX1|ROCK1|TEK|UBB|UBC|VEGFA	338/43622 genes: 0,77%
EGFR tyrosine kinase inhibitor resistance	KEGG:hsa01521	5.7e-25	8.66e-22	20	AKT1|BAD|BAX|BCL2|BCL2L1|BCL2L11|FGFR3|GRB2|GSK3B|IGF1|KDR|MAP2K1|MAPK1|MAPK3|MTOR|NRG1|PDGFRA|RAF1|STAT3|VEGFA	79/43622 genes: 0,18%
Influenza A	KEGG:hsa05164	2.14e-24	3.24e-21	25	ACTG1|AKT1|CASP1|CASP9|CCL2|CXCL10|CXCL8|CYCS|FAS|FASLG|GSK3B|HSPA1B|HSPA8|IFNG|IL1B|JUN|MAP2K1|MAP2K6|MAPK1|MAPK3|NFKB1|NFKBIA|RAF1|RELA|TNF	173/43622 genes: 0,40%
Toll-Like Receptors Cascades	REACT:R-HSA-168898	2.37e-24	3.59e-21	24	CASP8|CREB1|CTSL|DNM2|ELK1|FOS|ITGAM|JUN|MAP2K1|MAP2K6|MAPK1|MAPK3|MEF2C|NFKB1|NFKBIA|PTPN4|RELA|RIPK1|RPS6KA2|S100A8|S100A9|TRAF6|UBB|UBC	153/43622 genes: 0,35%
Downstream signaling events of B Cell Receptor (BCR)	REACT:R-HSA-1168372	2.81e-24	4.26e-21	26	AGO3|AKT1|BAD|CASP9|CDKN1A|CREB1|FGFR3|GRB2|GSK3B|IRS2|KIT|MAPK1|MAPK3|MDM2|MTOR|NFKB1|NFKBIA|NR4A1|NRG1|PDGFRA|PSMB1|PSMC4|RELA|TP53|UBB|UBC	197/43622 genes: 0,45%
Colorectal cancer	KEGG:hsa05210	4.2e-24	6.37e-21	18	AKT1|BAD|BAX|BCL2|CASP3|CASP9|CCND1|CYCS|FOS|GSK3B|JUN|MAP2K1|MAPK1|MAPK3|MYC|RAF1|TGFB1|TP53	60/43622 genes: 0,14%
Chagas disease (American trypanosomiasis)	KEGG:hsa05142	4.36e-24	6.62e-21	21	AKT1|CASP8|CCL2|CXCL8|FAS|FASLG|FOS|IFNG|IL1B|IL2|JUN|MAPK1|MAPK3|NFKB1|NFKBIA|NOS2|RELA|SERPINE1|TGFB1|TNF|TRAF6	102/43622 genes: 0,23%
Parkinson's disease	KEGG:hsa05012	1.01e-23	1.54e-20	23	APAF1|CASP3|CASP9|COX5A|COX6A1|COX6B1|COX7A2|COX7A2L|CYC1|CYCS|DRD2|LRRK2|PRKACA|PRKN|SDHB|SLC18A2|SLC6A3|SNCA|TH|UBA1|UBB|UCHL1|UQCRC1	142/43622 genes: 0,33%
Apoptosis - multiple species	KEGG:hsa04215	1.39e-23	2.12e-20	15	APAF1|BAK1|BAX|BBC3|BCL2|BCL2L1|BCL2L11|BECN1|BID|CASP3|CASP7|CASP8|CASP9|CYCS|PMAIP1	33/43622 genes: 0,08%
Breast cancer	KEGG:hsa05224	1.41e-23	2.15e-20	23	AKT1|CCND1|CDKN1A|DLL1|E2F1|FOS|GRB2|GSK3B|HEY2|HEYL|IGF1|JUN|KIT|MAP2K1|MAPK1|MAPK3|MTOR|MYC|RAF1|RB1|TP53|WNT1|WNT5A	144/43622 genes: 0,33%
Glioma	KEGG:hsa05214	1.59e-23	2.41e-20	18	AKT1|CALM1|CALM2|CCND1|CDKN1A|CDKN2A|E2F1|GRB2|IGF1|MAP2K1|MAPK1|MAPK3|MDM2|MTOR|PDGFRA|RAF1|RB1|TP53	64/43622 genes: 0,15%
Pancreatic cancer	KEGG:hsa05212	1.59e-23	2.41e-20	18	AKT1|BAD|BCL2L1|CASP9|CCND1|CDKN2A|E2F1|MAP2K1|MAPK1|MAPK3|NFKB1|RAF1|RB1|RELA|STAT3|TGFB1|TP53|VEGFA	64/43622 genes: 0,15%
Cellular Senescence	REACT:R-HSA-2559583	5.16e-23	7.84e-20	25	AGO3|CDK2|CDKN1A|CDKN2A|CXCL8|E2F1|FOS|H2AC20|H2AC6|H2BC9|HMGA2|JUN|MAP2K6|MAPK1|MAPK3|MDM2|MDM4|NFKB1|RB1|RELA|RPS6KA2|STAT3|TP53|UBB|UBC	196/43622 genes: 0,45%
Epstein-Barr virus infection	KEGG:hsa05169	8.6e-23	1.31e-19	25	AKT1|BCL2|CDK2|CDKN1A|GSK3B|HSPA1B|HSPA8|IFNG|JUN|MAP2K6|MDM2|MYC|NFKB1|NFKBIA|POLR1C|POLR2K|PRKACA|PSMC4|RB1|RELA|RIPK1|STAT3|TNFAIP3|TP53|TRAF6	200/43622 genes: 0,46%
Small cell lung cancer	KEGG:hsa05222	9.34e-23	1.42e-19	19	AKT1|APAF1|BCL2|BCL2L1|CASP9|CCND1|CDK2|CYCS|E2F1|LAMC2|MYC|NFKB1|NFKBIA|NOS2|PTGS2|RB1|RELA|TP53|TRAF6	84/43622 genes: 0,19%
HTLV-I infection	KEGG:hsa05166	1.57e-22	2.38e-19	27	AKT1|BAX|BCL2L1|CCND1|CCND2|CDKN1A|CDKN2A|CREB1|E2F1|ELK1|FOS|GSK3B|IL2|JUN|MYC|NFKB1|NFKBIA|PCNA|PDGFRA|PRKACA|RB1|RELA|TGFB1|TNF|TP53|WNT1|WNT5A	256/43622 genes: 0,59%
Toll Like Receptor 4 (TLR4) Cascade	REACT:R-HSA-166016	4.88e-22	7.41e-19	21	CASP8|CREB1|DNM2|ELK1|FOS|ITGAM|JUN|MAP2K1|MAP2K6|MAPK1|MAPK3|MEF2C|NFKB1|NFKBIA|PTPN4|RELA|RIPK1|RPS6KA2|TRAF6|UBB|UBC	126/43622 genes: 0,29%
Amyotrophic lateral sclerosis (ALS)	KEGG:hsa05014	6.32e-22	9.6e-19	16	APAF1|BAD|BAX|BCL2|BCL2L1|BID|CASP1|CASP3|CASP9|CAT|CYCS|GPX1|MAP2K6|SOD1|TNF|TP53	51/43622 genes: 0,12%
NOD-like receptor signaling pathway	KEGG:hsa04621	7.24e-22	1.1e-18	23	ATG12|BCL2|BCL2L1|CAMP|CASP1|CASP8|CCL2|CXCL8|HSP90AA1|HSP90AB1|IL1B|ITPR1|JUN|MAPK1|MAPK3|NFKB1|NFKBIA|NOX1|RELA|RIPK1|TNF|TNFAIP3|TRAF6	170/43622 genes: 0,39%
Bladder cancer	KEGG:hsa05219	8.06e-22	1.22e-18	15	CCND1|CDKN1A|CDKN2A|CXCL8|E2F1|FGFR3|MAP2K1|MAPK1|MAPK3|MDM2|MYC|RAF1|RB1|TP53|VEGFA	41/43622 genes: 0,09%
Ras signaling pathway	KEGG:hsa04014	2.05e-21	3.12e-18	25	AKT1|BAD|BCL2L1|CALM1|CALM2|ELK1|FASLG|FGFR3|GNG5|GNGT2|GRB2|IGF1|KDR|KIT|MAP2K1|MAPK1|MAPK3|NFKB1|PDGFRA|PLCE1|PRKACA|RAF1|RELA|TEK|VEGFA	227/43622 genes: 0,52%
Estrogen signaling pathway	KEGG:hsa04915	2.22e-21	3.37e-18	19	AKT1|CALM1|CALM2|CREB1|FKBP4|FKBP5|FOS|GRB2|HSP90AA1|HSP90AB1|HSPA1B|HSPA8|ITPR1|JUN|MAP2K1|MAPK1|MAPK3|PRKACA|RAF1	98/43622 genes: 0,22%
Hemostasis	REACT:R-HSA-109582	2.54e-21	3.85e-18	37	AKT1|ALB|ANXA2|CALM1|CALM2|CDK2|CLU|DGKI|F3|GNG5|GNGT2|GRB2|HSPA5|IGF1|IL2|ITGAM|ITPR1|KCNMA1|KIF1B|MAPK1|MAPK3|NOS2|PCDH7|PDE1B|PLAUR|PRKACA|PRKCZ|PSAP|RAF1|SERPINE1|SLC8A1|SOD1|TEK|TGFB1|TP53|VEGFA|VPS45	639/43622 genes: 1,46%
Alcoholism	KEGG:hsa05034	2.75e-21	4.18e-18	23	BDNF|CALM1|CALM2|CREB1|DRD2|GNG5|GNGT2|GRB2|H2AC20|H2AC6|H2BC9|HDAC3|HDAC6|MAP2K1|MAPK1|MAPK3|NTRK2|PDYN|PRKACA|RAF1|SLC18A2|SLC6A3|TH	180/43622 genes: 0,41%
Adaptive Immune System	REACT:R-HSA-1280218	3.21e-21	4.87e-18	41	AGO3|AKT1|BAD|CALM1|CALM2|CASP9|CD34|CDKN1A|CREB1|CTSL|DNM2|FGFR3|GRB2|GSK3B|HSPA5|IRS2|ITPR1|KIT|LRRC41|MAPK1|MAPK3|MDM2|MTOR|NCF1|NFKB1|NFKBIA|NR4A1|NRG1|PDGFRA|PRKACA|PRKN|PSMB1|PSMC4|RAF1|RBX1|RELA|TP53|TRAF6|UBA1|UBB|UBC	818/43622 genes: 1,88%
Chemokine signaling pathway	KEGG:hsa04062	3.56e-21	5.4e-18	23	AKT1|CCL19|CCL2|CCL21|CXCL10|CXCL8|GNG5|GNGT2|GRB2|GSK3B|MAP2K1|MAPK1|MAPK3|NCF1|NFKB1|NFKBIA|PRKACA|PRKCZ|PTK2B|RAF1|RELA|ROCK1|STAT3	182/43622 genes: 0,42%
Signaling by GPCR	REACT:R-HSA-372790	6.16e-21	9.35e-18	51	ADORA1|AKT1|CALM1|CALM2|CCL19|CCL21|CHRM2|CREB1|CXCL10|CXCL8|DGKI|DRD2|DRD4|DRD5|FGFR3|GNG5|GNGT2|GPR27|GRB2|HCRTR1|IL2|IRS2|ITPR1|KISS1|KIT|MAP2K1|MAPK1|MAPK3|NPS|NRG1|NRTN|P2RY4|PDE1B|PDGFRA|PDYN|PEBP1|PNOC|PRKACA|PSAP|PSMB1|PSMC4|RAF1|RBX1|ROCK1|RPS6KA2|TEK|TSHB|UBB|UBC|WNT1|WNT5A	1341/43622 genes: 3,07%
Leishmaniasis	KEGG:hsa05140	7.66e-21	1.16e-17	17	ELK1|FOS|IFNG|IL1B|ITGAM|JUN|MAPK1|MAPK3|NCF1|NFKB1|NFKBIA|NOS2|PTGS2|RELA|TGFB1|TNF|TRAF6	72/43622 genes: 0,17%
Huntington's disease	KEGG:hsa05016	1.39e-20	2.11e-17	23	APAF1|BAX|BBC3|BDNF|CASP3|CASP8|CASP9|COX5A|COX6A1|COX6B1|COX7A2|COX7A2L|CREB1|CYC1|CYCS|GPX1|ITPR1|POLR2K|SDHB|SOD1|SOD2|TP53|UQCRC1	193/43622 genes: 0,44%
Pertussis	KEGG:hsa05133	2.1e-20	3.19e-17	17	CALM1|CALM2|CASP1|CASP3|CASP7|CXCL8|FOS|IL1B|ITGAM|JUN|MAPK1|MAPK3|NFKB1|NOS2|RELA|TNF|TRAF6	76/43622 genes: 0,17%
Measles	KEGG:hsa05162	4.05e-20	6.15e-17	20	AKT1|BBC3|CCND1|CCND2|CDK2|FAS|FASLG|GSK3B|HSPA1B|HSPA8|IFNG|IL1B|IL2|NFKB1|NFKBIA|RELA|STAT3|TNFAIP3|TP53|TRAF6	133/43622 genes: 0,30%
VEGFR2 mediated cell proliferation	REACT:R-HSA-5218921	4.82e-20	7.32e-17	25	CALM1|CALM2|FGFR3|GRB2|IL2|IRS2|ITPR1|KDR|KIT|MAP2K1|MAPK1|MAPK3|NRG1|NRTN|PDGFRA|PEBP1|PRKCZ|PSMB1|PSMC4|RAF1|RBX1|TEK|UBB|UBC|VEGFA	258/43622 genes: 0,59%
Thyroid hormone signaling pathway	KEGG:hsa04919	6.56e-20	9.96e-17	19	ACTG1|AKT1|BAD|BMP4|CASP9|CCND1|DIO1|GSK3B|HDAC3|MAP2K1|MAPK1|MAPK3|MDM2|MTOR|MYC|PLCE1|PRKACA|RAF1|TP53	116/43622 genes: 0,27%
MyD88-independent TLR3/TLR4 cascade	REACT:R-HSA-166166	8.69e-20	1.32e-16	18	CASP8|CREB1|ELK1|FOS|JUN|MAP2K1|MAP2K6|MAPK1|MAPK3|MEF2C|NFKB1|NFKBIA|RELA|RIPK1|RPS6KA2|TRAF6|UBB|UBC	99/43622 genes: 0,23%
Toll Like Receptor 3 (TLR3) Cascade	REACT:R-HSA-168164	8.69e-20	1.32e-16	18	CASP8|CREB1|ELK1|FOS|JUN|MAP2K1|MAP2K6|MAPK1|MAPK3|MEF2C|NFKB1|NFKBIA|RELA|RIPK1|RPS6KA2|TRAF6|UBB|UBC	99/43622 genes: 0,23%
TRIF-mediated TLR3/TLR4 signaling	REACT:R-HSA-937061	8.69e-20	1.32e-16	18	CASP8|CREB1|ELK1|FOS|JUN|MAP2K1|MAP2K6|MAPK1|MAPK3|MEF2C|NFKB1|NFKBIA|RELA|RIPK1|RPS6KA2|TRAF6|UBB|UBC	99/43622 genes: 0,23%
Gastrin-CREB signalling pathway via PKC and MAPK	REACT:R-HSA-881907	2.32e-19	3.53e-16	30	CALM1|CALM2|CREB1|DGKI|FGFR3|GNG5|GNGT2|GRB2|HCRTR1|IL2|IRS2|ITPR1|KISS1|KIT|MAP2K1|MAPK1|MAPK3|NPS|NRG1|NRTN|PDGFRA|PEBP1|PSMB1|PSMC4|RAF1|RBX1|RPS6KA2|TEK|UBB|UBC	443/43622 genes: 1,02%
PIP3 activates AKT signaling	REACT:R-HSA-1257604	2.87e-19	4.36e-16	19	AGO3|AKT1|BAD|CASP9|CDKN1A|CREB1|FGFR3|GRB2|GSK3B|IRS2|KIT|MAPK1|MAPK3|MDM2|MTOR|NR4A1|NRG1|PDGFRA|TP53	125/43622 genes: 0,29%
cAMP signaling pathway	KEGG:hsa04024	4.48e-19	6.81e-16	22	ADORA1|AKT1|BAD|BDNF|CALM1|CALM2|CHRM2|CREB1|DRD2|DRD5|FOS|JUN|MAP2K1|MAPK1|MAPK3|NFKB1|NFKBIA|PLCE1|PRKACA|RAF1|RELA|ROCK1	198/43622 genes: 0,45%
GAB1 signalosome	REACT:R-HSA-180292	4.57e-19	6.94e-16	19	AGO3|AKT1|BAD|CASP9|CDKN1A|CREB1|FGFR3|GRB2|GSK3B|IRS2|KIT|MAPK1|MAPK3|MDM2|MTOR|NR4A1|NRG1|PDGFRA|TP53	128/43622 genes: 0,29%
PI3K/AKT activation	REACT:R-HSA-198203	4.57e-19	6.94e-16	19	AGO3|AKT1|BAD|CASP9|CDKN1A|CREB1|FGFR3|GRB2|GSK3B|IRS2|KIT|MAPK1|MAPK3|MDM2|MTOR|NR4A1|NRG1|PDGFRA|TP53	128/43622 genes: 0,29%
Focal adhesion	KEGG:hsa04510	5.01e-19	7.6e-16	22	ACTG1|AKT1|BAD|BCL2|CCND1|CCND2|ELK1|GRB2|GSK3B|IGF1|ITGB8|JUN|KDR|LAMC2|MAP2K1|MAPK1|MAPK3|PDGFRA|RAF1|ROCK1|TNR|VEGFA	199/43622 genes: 0,46%
Osteoclast differentiation	KEGG:hsa04380	5.32e-19	8.08e-16	19	AKT1|CREB1|FOS|GRB2|IFNG|IL1B|JUN|MAP2K1|MAP2K6|MAPK1|MAPK3|NCF1|NFKB1|NFKBIA|NOX1|RELA|TGFB1|TNF|TRAF6	129/43622 genes: 0,30%
Metabolic pathways	KEGG:hsa01100	7.23e-19	1.1e-15	47	ACADS|ACO2|ALAS2|ALDH2|ALDH5A1|ALDOC|ALPL|ATP6V0B|ATP6V0C|ATP6V1C1|CDIPT|COX5A|COX6A1|COX6B1|CYC1|CYCS|CYP1A1|CYP1A2|CYP2E1|DGKI|DLST|ENO1|ENO2|GCLC|GOT1|GPT|GUK1|HK1|HMOX1|IDH3A|MBOAT2|MTHFR|NOS2|ODC1|PDHA1|PGS1|PIGC|PLCE1|POLR1C|POLR2K|PTGES|PTGS2|SDHB|TH|TPI1|TPO|UQCRC1	1270/43622 genes: 2,91%
MAPK family signaling cascades	REACT:R-HSA-5683057	8.24e-19	1.25e-15	25	AGO3|CALM1|CALM2|FGFR3|GRB2|IL2|IRS2|JUN|KIT|MAP2K1|MAPK1|MAPK3|MYC|NRG1|NRTN|PDGFRA|PEBP1|PRKACA|PSMB1|PSMC4|RAF1|RBX1|TEK|UBB|UBC	290/43622 genes: 0,66%
Signaling by Insulin receptor	REACT:R-HSA-74752	8.32e-19	1.26e-15	26	AKT1|ATP6V0B|ATP6V0C|ATP6V1C1|CALM1|CALM2|FGFR3|GRB2|IL2|IRS2|KIT|MAP2K1|MAPK1|MAPK3|MTOR|NRG1|NRTN|PDGFRA|PEBP1|PSMB1|PSMC4|RAF1|RBX1|TEK|UBB|UBC	322/43622 genes: 0,74%
Detoxification of Reactive Oxygen Species	REACT:R-HSA-3299685	1.26e-18	1.91e-15	13	CAT|CYCS|GPX1|GSR|GSTP1|NCF1|NOX4|PRDX1|PRDX2|PRDX3|SOD1|SOD2|TXNRD1	38/43622 genes: 0,09%
Activated TLR4 signalling	REACT:R-HSA-166054	1.47e-18	2.23e-15	18	CASP8|CREB1|ELK1|FOS|JUN|MAP2K1|MAP2K6|MAPK1|MAPK3|MEF2C|NFKB1|NFKBIA|RELA|RIPK1|RPS6KA2|TRAF6|UBB|UBC	115/43622 genes: 0,26%
Role of LAT2/NTAL/LAB on calcium mobilization	REACT:R-HSA-2730905	1.72e-18	2.61e-15	19	AGO3|AKT1|BAD|CASP9|CDKN1A|CREB1|FGFR3|GRB2|GSK3B|IRS2|KIT|MAPK1|MAPK3|MDM2|MTOR|NR4A1|NRG1|PDGFRA|TP53	137/43622 genes: 0,31%
Apelin signaling pathway	KEGG:hsa04371	1.98e-18	3.01e-15	19	AKT1|BECN1|CALM1|CALM2|CCND1|GNG5|GNGT2|ITPR1|KLF2|MAP2K1|MAPK1|MAPK3|MEF2C|MTOR|NOS2|PRKACA|RAF1|SERPINE1|SLC8A1	138/43622 genes: 0,32%
MyD88 cascade initiated on plasma membrane	REACT:R-HSA-975871	4.48e-18	6.8e-15	16	CREB1|ELK1|FOS|JUN|MAP2K1|MAP2K6|MAPK1|MAPK3|MEF2C|NFKB1|NFKBIA|RELA|RPS6KA2|TRAF6|UBB|UBC	84/43622 genes: 0,19%
Toll Like Receptor 10 (TLR10) Cascade	REACT:R-HSA-168142	4.48e-18	6.8e-15	16	CREB1|ELK1|FOS|JUN|MAP2K1|MAP2K6|MAPK1|MAPK3|MEF2C|NFKB1|NFKBIA|RELA|RPS6KA2|TRAF6|UBB|UBC	84/43622 genes: 0,19%
Toll Like Receptor 5 (TLR5) Cascade	REACT:R-HSA-168176	4.48e-18	6.8e-15	16	CREB1|ELK1|FOS|JUN|MAP2K1|MAP2K6|MAPK1|MAPK3|MEF2C|NFKB1|NFKBIA|RELA|RPS6KA2|TRAF6|UBB|UBC	84/43622 genes: 0,19%
Cell Cycle	REACT:R-HSA-1640170	5.23e-18	7.93e-15	33	AKT1|CCND1|CCND2|CDC25C|CDK2|CDK5RAP2|CDKN1A|CDKN2A|CEP290|E2F1|H2AC20|H2AC6|H2BC9|HSP90AA1|HSP90AB1|MAPK1|MAPK3|MDM2|MDM4|MYC|NIPBL|PCNA|PRKACA|PSMB1|PSMC4|RB1|RBX1|RPS27|SUMO1|TP53|TUBA1A|UBB|UBC	621/43622 genes: 1,42%
Melanoma	KEGG:hsa05218	5.93e-18	9.01e-15	15	AKT1|BAD|CCND1|CDKN1A|CDKN2A|E2F1|IGF1|MAP2K1|MAPK1|MAPK3|MDM2|PDGFRA|RAF1|RB1|TP53	69/43622 genes: 0,16%
Toll-like receptor signaling pathway	KEGG:hsa04620	6.21e-18	9.42e-15	17	AKT1|CASP8|CXCL10|CXCL8|FOS|IL1B|JUN|MAP2K1|MAP2K6|MAPK1|MAPK3|NFKB1|NFKBIA|RELA|RIPK1|TNF|TRAF6	104/43622 genes: 0,24%
Acute myeloid leukemia	KEGG:hsa05221	6.73e-18	1.02e-14	14	AKT1|BAD|CCND1|GRB2|KIT|MAP2K1|MAPK1|MAPK3|MTOR|MYC|NFKB1|RAF1|RELA|STAT3	55/43622 genes: 0,13%
Prolactin signaling pathway	KEGG:hsa04917	7.5e-18	1.14e-14	15	AKT1|CCND1|CCND2|FOS|GRB2|GSK3B|MAP2K1|MAPK1|MAPK3|NFKB1|PRL|RAF1|RELA|STAT3|TH	70/43622 genes: 0,16%
Autophagy - animal	KEGG:hsa04140	1.07e-17	1.63e-14	18	AKT1|ATG12|BAD|BCL2|BCL2L1|BECN1|BNIP3|CTSL|DDIT4|IRS2|ITPR1|MAP2K1|MAPK1|MAPK3|MTOR|PRKACA|RAF1|TRAF6	128/43622 genes: 0,29%
Cell Cycle, Mitotic	REACT:R-HSA-69278	1.42e-17	2.16e-14	30	AKT1|CCND1|CCND2|CDC25C|CDK2|CDK5RAP2|CDKN1A|CDKN2A|CEP290|E2F1|H2AC20|H2AC6|H2BC9|HSP90AA1|HSP90AB1|MAPK1|MAPK3|MYC|NIPBL|PCNA|PRKACA|PSMB1|PSMC4|RB1|RBX1|RPS27|TP53|TUBA1A|UBB|UBC	514/43622 genes: 1,18%
Non-small cell lung cancer	KEGG:hsa05223	1.54e-17	2.33e-14	14	AKT1|BAD|CASP9|CCND1|CDKN2A|E2F1|GRB2|MAP2K1|MAPK1|MAPK3|RAF1|RB1|STAT3|TP53	58/43622 genes: 0,13%
Senescence-Associated Secretory Phenotype (SASP)	REACT:R-HSA-2559582	1.67e-17	2.54e-14	17	CDK2|CDKN1A|CDKN2A|CXCL8|FOS|H2AC20|H2AC6|H2BC9|JUN|MAPK1|MAPK3|NFKB1|RELA|RPS6KA2|STAT3|UBB|UBC	110/43622 genes: 0,25%
TRAF6 mediated induction of NFkB and MAP kinases upon TLR7/8 or 9 activation	REACT:R-HSA-975138	1.74e-17	2.64e-14	16	CREB1|ELK1|FOS|JUN|MAP2K1|MAP2K6|MAPK1|MAPK3|MEF2C|NFKB1|NFKBIA|RELA|RPS6KA2|TRAF6|UBB|UBC	91/43622 genes: 0,21%
IGF1R signaling cascade	REACT:R-HSA-2428924	1.99e-17	3.03e-14	24	AKT1|CALM1|CALM2|FGFR3|GRB2|IGF1|IL2|IRS2|KIT|MAP2K1|MAPK1|MAPK3|MTOR|NRG1|NRTN|PDGFRA|PEBP1|PSMB1|PSMC4|RAF1|RBX1|TEK|UBB|UBC	298/43622 genes: 0,68%
IRS-related events triggered by IGF1R	REACT:R-HSA-2428928	1.99e-17	3.03e-14	24	AKT1|CALM1|CALM2|FGFR3|GRB2|IGF1|IL2|IRS2|KIT|MAP2K1|MAPK1|MAPK3|MTOR|NRG1|NRTN|PDGFRA|PEBP1|PSMB1|PSMC4|RAF1|RBX1|TEK|UBB|UBC	298/43622 genes: 0,68%
Jak-STAT signaling pathway	KEGG:hsa04630	2.1e-17	3.19e-14	19	AKT1|BCL2|BCL2L1|CCND1|CCND2|CDKN1A|CRLF2|GFAP|GRB2|IFNG|IL2|LIFR|MCL1|MTOR|MYC|PRL|RAF1|STAT3|STAT4	156/43622 genes: 0,36%
Signaling by Type 1 Insulin-like Growth Factor 1 Receptor (IGF1R)	REACT:R-HSA-2404192	2.15e-17	3.27e-14	24	AKT1|CALM1|CALM2|FGFR3|GRB2|IGF1|IL2|IRS2|KIT|MAP2K1|MAPK1|MAPK3|MTOR|NRG1|NRTN|PDGFRA|PEBP1|PSMB1|PSMC4|RAF1|RBX1|TEK|UBB|UBC	299/43622 genes: 0,69%
MyD88 dependent cascade initiated on endosome	REACT:R-HSA-975155	2.51e-17	3.81e-14	16	CREB1|ELK1|FOS|JUN|MAP2K1|MAP2K6|MAPK1|MAPK3|MEF2C|NFKB1|NFKBIA|RELA|RPS6KA2|TRAF6|UBB|UBC	93/43622 genes: 0,21%
Toll Like Receptor 7/8 (TLR7/8) Cascade	REACT:R-HSA-168181	2.51e-17	3.81e-14	16	CREB1|ELK1|FOS|JUN|MAP2K1|MAP2K6|MAPK1|MAPK3|MEF2C|NFKB1|NFKBIA|RELA|RPS6KA2|TRAF6|UBB|UBC	93/43622 genes: 0,21%
FCERI mediated MAPK activation	REACT:R-HSA-2871796	2.97e-17	4.51e-14	23	CALM1|CALM2|FGFR3|FOS|GRB2|IL2|IRS2|JUN|KIT|MAP2K1|MAPK1|MAPK3|NRG1|NRTN|PDGFRA|PEBP1|PSMB1|PSMC4|RAF1|RBX1|TEK|UBB|UBC	271/43622 genes: 0,62%
MyD88:Mal cascade initiated on plasma membrane	REACT:R-HSA-166058	3.58e-17	5.44e-14	16	CREB1|ELK1|FOS|JUN|MAP2K1|MAP2K6|MAPK1|MAPK3|MEF2C|NFKB1|NFKBIA|RELA|RPS6KA2|TRAF6|UBB|UBC	95/43622 genes: 0,22%
Toll Like Receptor 2 (TLR2) Cascade	REACT:R-HSA-181438	3.58e-17	5.44e-14	16	CREB1|ELK1|FOS|JUN|MAP2K1|MAP2K6|MAPK1|MAPK3|MEF2C|NFKB1|NFKBIA|RELA|RPS6KA2|TRAF6|UBB|UBC	95/43622 genes: 0,22%
Toll Like Receptor TLR1:TLR2 Cascade	REACT:R-HSA-168179	3.58e-17	5.44e-14	16	CREB1|ELK1|FOS|JUN|MAP2K1|MAP2K6|MAPK1|MAPK3|MEF2C|NFKB1|NFKBIA|RELA|RPS6KA2|TRAF6|UBB|UBC	95/43622 genes: 0,22%
Toll Like Receptor TLR6:TLR2 Cascade	REACT:R-HSA-168188	3.58e-17	5.44e-14	16	CREB1|ELK1|FOS|JUN|MAP2K1|MAP2K6|MAPK1|MAPK3|MEF2C|NFKB1|NFKBIA|RELA|RPS6KA2|TRAF6|UBB|UBC	95/43622 genes: 0,22%
Transmission across Chemical Synapses	REACT:R-HSA-112315	5.06e-17	7.68e-14	21	ACHE|ALDH2|ALDH5A1|CACNA1E|CALM1|CALM2|CPLX1|CREB1|GABRA6|GNG5|GNGT2|HSPA8|MAPK1|MDM2|PRKACA|RAF1|RPS6KA2|SLC18A2|SLC22A2|SLC5A7|SLC6A3	217/43622 genes: 0,50%
Toll Like Receptor 9 (TLR9) Cascade	REACT:R-HSA-168138	5.08e-17	7.71e-14	16	CREB1|ELK1|FOS|JUN|MAP2K1|MAP2K6|MAPK1|MAPK3|MEF2C|NFKB1|NFKBIA|RELA|RPS6KA2|TRAF6|UBB|UBC	97/43622 genes: 0,22%
MAP kinase activation in TLR cascade	REACT:R-HSA-450294	6.96e-17	1.06e-13	14	CREB1|ELK1|FOS|JUN|MAP2K1|MAP2K6|MAPK1|MAPK3|MEF2C|NFKB1|RPS6KA2|TRAF6|UBB|UBC	64/43622 genes: 0,15%
Platelet activation, signaling and aggregation	REACT:R-HSA-76002	7.15e-17	1.08e-13	23	AKT1|ALB|CALM1|CALM2|CLU|DGKI|GNG5|GNGT2|GRB2|HSPA5|IGF1|IL2|ITPR1|MAPK1|MAPK3|PCDH7|PRKCZ|PSAP|RAF1|SERPINE1|SOD1|TGFB1|VEGFA	282/43622 genes: 0,65%
Endometrial cancer	KEGG:hsa05213	7.6e-17	1.15e-13	13	AKT1|BAD|CASP9|CCND1|ELK1|GRB2|GSK3B|MAP2K1|MAPK1|MAPK3|MYC|RAF1|TP53	50/43622 genes: 0,11%
Central carbon metabolism in cancer	KEGG:hsa05230	8.8e-17	1.34e-13	14	AKT1|FGFR3|HK1|KIT|MAP2K1|MAPK1|MAPK3|MTOR|MYC|PDGFRA|PDHA1|RAF1|SIRT3|TP53	65/43622 genes: 0,15%
Signaling by Leptin	REACT:R-HSA-2586552	8.82e-17	1.34e-13	22	CALM1|CALM2|FGFR3|GRB2|IL2|IRS2|KIT|MAP2K1|MAPK1|MAPK3|NRG1|NRTN|PDGFRA|PEBP1|PSMB1|PSMC4|RAF1|RBX1|STAT3|TEK|UBB|UBC	253/43622 genes: 0,58%
Metabolism of amino acids and derivatives	REACT:R-HSA-71291	1.59e-16	2.41e-13	25	DIO1|DLST|GCLC|GOT1|GPT|GSR|NQO1|OAZ2|ODC1|PDHA1|PSMB1|PSMC4|RPL12|RPL19|RPL41|RPL8|RPL9|RPS12|RPS15|RPS27|SLC5A5|TH|TPO|TSHB|TXNRD1	362/43622 genes: 0,83%
IRS-mediated signalling	REACT:R-HSA-112399	1.78e-16	2.71e-13	23	AKT1|CALM1|CALM2|FGFR3|GRB2|IL2|IRS2|KIT|MAP2K1|MAPK1|MAPK3|MTOR|NRG1|NRTN|PDGFRA|PEBP1|PSMB1|PSMC4|RAF1|RBX1|TEK|UBB|UBC	294/43622 genes: 0,67%
Interleukin-2 signaling	REACT:R-HSA-451927	1.85e-16	2.81e-13	22	CALM1|CALM2|FGFR3|GRB2|IL2|IRS2|KIT|MAP2K1|MAPK1|MAPK3|NRG1|NRTN|PDGFRA|PEBP1|PSMB1|PSMC4|PTK2B|RAF1|RBX1|TEK|UBB|UBC	262/43622 genes: 0,60%
Insulin receptor signalling cascade	REACT:R-HSA-74751	2.22e-16	3.38e-13	23	AKT1|CALM1|CALM2|FGFR3|GRB2|IL2|IRS2|KIT|MAP2K1|MAPK1|MAPK3|MTOR|NRG1|NRTN|PDGFRA|PEBP1|PSMB1|PSMC4|RAF1|RBX1|TEK|UBB|UBC	297/43622 genes: 0,68%
Cellular response to heat stress	REACT:R-HSA-3371556	3.48e-16	5.28e-13	15	DNAJB6|EEF1A1|FKBP4|GSK3B|HDAC6|HSF1|HSP90AA1|HSP90AB1|HSPA1B|HSPA5|HSPA8|MAPK1|MAPK3|MTOR|SIRT1	89/43622 genes: 0,20%
RET signaling	REACT:R-HSA-8853659	3.48e-16	5.29e-13	22	CALM1|CALM2|FGFR3|GRB2|IL2|IRS2|KIT|MAP2K1|MAPK1|MAPK3|NRG1|NRTN|PDGFRA|PEBP1|PRKACA|PSMB1|PSMC4|RAF1|RBX1|TEK|UBB|UBC	270/43622 genes: 0,62%
Hepatitis C	KEGG:hsa05160	3.51e-16	5.32e-13	17	AKT1|BAD|CDKN1A|CXCL8|GRB2|GSK3B|MAPK1|MAPK3|NFKB1|NFKBIA|RAF1|RELA|RIPK1|STAT3|TNF|TP53|TRAF6	131/43622 genes: 0,30%
Interleukin-3, 5 and GM-CSF signaling	REACT:R-HSA-512988	3.77e-16	5.72e-13	22	CALM1|CALM2|FGFR3|GRB2|IL2|IRS2|KIT|MAP2K1|MAPK1|MAPK3|NRG1|NRTN|PDGFRA|PEBP1|PRKACA|PSMB1|PSMC4|RAF1|RBX1|TEK|UBB|UBC	271/43622 genes: 0,62%
Rap1 signaling pathway	KEGG:hsa04015	3.89e-16	5.9e-13	20	ACTG1|AKT1|CALM1|CALM2|DRD2|FGFR3|IGF1|ITGAM|KDR|KIT|MAP2K1|MAP2K6|MAPK1|MAPK3|PDGFRA|PLCE1|PRKCZ|RAF1|TEK|VEGFA	210/43622 genes: 0,48%
PI3K/AKT Signaling in Cancer	REACT:R-HSA-2219528	4.14e-16	6.29e-13	15	AKT1|BAD|CASP9|CDKN1A|CREB1|FGFR3|GRB2|GSK3B|IRS2|KIT|MDM2|MTOR|NR4A1|NRG1|PDGFRA	90/43622 genes: 0,21%
NCAM signaling for neurite out-growth	REACT:R-HSA-375165	5.53e-16	8.39e-13	22	CALM1|CALM2|CREB1|FGFR3|GRB2|IL2|IRS2|KIT|MAP2K1|MAPK1|MAPK3|NRG1|NRTN|PDGFRA|PEBP1|PSMB1|PSMC4|RAF1|RBX1|TEK|UBB|UBC	276/43622 genes: 0,63%
GRB2 events in EGFR signaling	REACT:R-HSA-179812	5.99e-16	9.09e-13	21	CALM1|CALM2|FGFR3|GRB2|IL2|IRS2|KIT|MAP2K1|MAPK1|MAPK3|NRG1|NRTN|PDGFRA|PEBP1|PSMB1|PSMC4|RAF1|RBX1|TEK|UBB|UBC	245/43622 genes: 0,56%
RAF/MAP kinase cascade	REACT:R-HSA-5673001	5.99e-16	9.09e-13	21	CALM1|CALM2|FGFR3|GRB2|IL2|IRS2|KIT|MAP2K1|MAPK1|MAPK3|NRG1|NRTN|PDGFRA|PEBP1|PSMB1|PSMC4|RAF1|RBX1|TEK|UBB|UBC	245/43622 genes: 0,56%
SHC1 events in EGFR signaling	REACT:R-HSA-180336	5.99e-16	9.09e-13	21	CALM1|CALM2|FGFR3|GRB2|IL2|IRS2|KIT|MAP2K1|MAPK1|MAPK3|NRG1|NRTN|PDGFRA|PEBP1|PSMB1|PSMC4|RAF1|RBX1|TEK|UBB|UBC	245/43622 genes: 0,56%
SOS-mediated signalling	REACT:R-HSA-112412	5.99e-16	9.09e-13	21	CALM1|CALM2|FGFR3|GRB2|IL2|IRS2|KIT|MAP2K1|MAPK1|MAPK3|NRG1|NRTN|PDGFRA|PEBP1|PSMB1|PSMC4|RAF1|RBX1|TEK|UBB|UBC	245/43622 genes: 0,56%
Neuronal System	REACT:R-HSA-112316	7.15e-16	1.09e-12	24	ACHE|ALDH2|ALDH5A1|CACNA1E|CALM1|CALM2|CPLX1|CREB1|GABRA6|GNG5|GNGT2|HSPA8|KCNA2|KCNMA1|KCNQ2|MAPK1|MDM2|PRKACA|RAF1|RPS6KA2|SLC18A2|SLC22A2|SLC5A7|SLC6A3	349/43622 genes: 0,80%
NF-kappa B signaling pathway	KEGG:hsa04064	8.18e-16	1.24e-12	15	BCL2|BCL2A1|BCL2L1|CCL19|CCL21|CXCL8|IL1B|NFKB1|NFKBIA|PTGS2|RELA|RIPK1|TNF|TNFAIP3|TRAF6	94/43622 genes: 0,22%
ARMS-mediated activation	REACT:R-HSA-170984	8.31e-16	1.26e-12	21	CALM1|CALM2|FGFR3|GRB2|IL2|IRS2|KIT|MAP2K1|MAPK1|MAPK3|NRG1|NRTN|PDGFRA|PEBP1|PSMB1|PSMC4|RAF1|RBX1|TEK|UBB|UBC	249/43622 genes: 0,57%
Signalling to p38 via RIT and RIN	REACT:R-HSA-187706	8.31e-16	1.26e-12	21	CALM1|CALM2|FGFR3|GRB2|IL2|IRS2|KIT|MAP2K1|MAPK1|MAPK3|NRG1|NRTN|PDGFRA|PEBP1|PSMB1|PSMC4|RAF1|RBX1|TEK|UBB|UBC	249/43622 genes: 0,57%
Frs2-mediated activation	REACT:R-HSA-170968	9e-16	1.37e-12	21	CALM1|CALM2|FGFR3|GRB2|IL2|IRS2|KIT|MAP2K1|MAPK1|MAPK3|NRG1|NRTN|PDGFRA|PEBP1|PSMB1|PSMC4|RAF1|RBX1|TEK|UBB|UBC	250/43622 genes: 0,57%
Signaling pathways regulating pluripotency of stem cells	KEGG:hsa04550	9.7e-16	1.47e-12	17	AKT1|BMP4|FGFR3|GRB2|GSK3B|IGF1|INHBA|LIFR|MAP2K1|MAPK1|MAPK3|MYC|PAX6|RAF1|STAT3|WNT1|WNT5A	139/43622 genes: 0,32%
MAPK1/MAPK3 signaling	REACT:R-HSA-5684996	9.76e-16	1.48e-12	21	CALM1|CALM2|FGFR3|GRB2|IL2|IRS2|KIT|MAP2K1|MAPK1|MAPK3|NRG1|NRTN|PDGFRA|PEBP1|PSMB1|PSMC4|RAF1|RBX1|TEK|UBB|UBC	251/43622 genes: 0,58%
Prolonged ERK activation events	REACT:R-HSA-169893	1.06e-15	1.6e-12	21	CALM1|CALM2|FGFR3|GRB2|IL2|IRS2|KIT|MAP2K1|MAPK1|MAPK3|NRG1|NRTN|PDGFRA|PEBP1|PSMB1|PSMC4|RAF1|RBX1|TEK|UBB|UBC	252/43622 genes: 0,58%
Interleukin receptor SHC signaling	REACT:R-HSA-912526	1.34e-15	2.04e-12	21	CALM1|CALM2|FGFR3|GRB2|IL2|IRS2|KIT|MAP2K1|MAPK1|MAPK3|NRG1|NRTN|PDGFRA|PEBP1|PSMB1|PSMC4|RAF1|RBX1|TEK|UBB|UBC	255/43622 genes: 0,58%
Signalling to RAS	REACT:R-HSA-167044	1.45e-15	2.2e-12	21	CALM1|CALM2|FGFR3|GRB2|IL2|IRS2|KIT|MAP2K1|MAPK1|MAPK3|NRG1|NRTN|PDGFRA|PEBP1|PSMB1|PSMC4|RAF1|RBX1|TEK|UBB|UBC	256/43622 genes: 0,59%
Signalling to ERKs	REACT:R-HSA-187687	2.49e-15	3.78e-12	21	CALM1|CALM2|FGFR3|GRB2|IL2|IRS2|KIT|MAP2K1|MAPK1|MAPK3|NRG1|NRTN|PDGFRA|PEBP1|PSMB1|PSMC4|RAF1|RBX1|TEK|UBB|UBC	263/43622 genes: 0,60%
Cocaine addiction	KEGG:hsa05030	2.65e-15	4.03e-12	12	BDNF|CDK5R1|CREB1|DRD2|JUN|NFKB1|PDYN|PRKACA|RELA|SLC18A2|SLC6A3|TH	49/43622 genes: 0,11%
Cell cycle	KEGG:hsa04110	2.88e-15	4.38e-12	16	CCND1|CCND2|CDC25C|CDK2|CDKN1A|CDKN2A|E2F1|GADD45A|GSK3B|MDM2|MYC|PCNA|RB1|RBX1|TGFB1|TP53	124/43622 genes: 0,28%
T cell receptor signaling pathway	KEGG:hsa04660	3.37e-15	5.12e-12	15	AKT1|FOS|GRB2|GSK3B|IFNG|IL2|JUN|MAP2K1|MAPK1|MAPK3|NFKB1|NFKBIA|RAF1|RELA|TNF	103/43622 genes: 0,24%
Oxidative Stress Induced Senescence	REACT:R-HSA-2559580	3.74e-15	5.67e-12	16	AGO3|CDKN2A|E2F1|FOS|H2AC20|H2AC6|H2BC9|JUN|MAP2K6|MAPK1|MAPK3|MDM2|MDM4|TP53|UBB|UBC	126/43622 genes: 0,29%
Cytokine-cytokine receptor interaction	KEGG:hsa04060	4.21e-15	6.39e-12	21	BMP2|CCL19|CCL2|CCL21|CRLF2|CXCL10|CXCL8|FAS|FASLG|IFNG|IL1B|IL2|INHBA|KDR|KIT|LIFR|PDGFRA|PRL|TGFB1|TNF|VEGFA	270/43622 genes: 0,62%
Oxytocin signaling pathway	KEGG:hsa04921	4.44e-15	6.73e-12	17	ACTG1|CALM1|CALM2|CCND1|CDKN1A|ELK1|FOS|ITPR1|JUN|MAP2K1|MAPK1|MAPK3|MEF2C|PRKACA|PTGS2|RAF1|ROCK1	152/43622 genes: 0,35%
TP53 Regulates Metabolic Genes	REACT:R-HSA-5628897	4.77e-15	7.25e-12	14	AGO3|AKT1|COX5A|COX6A1|COX6B1|COX7A2L|CYCS|DDIT4|GSR|MTOR|PRDX1|PRDX2|TP53|TXNRD1	85/43622 genes: 0,19%
ErbB signaling pathway	KEGG:hsa04012	5.66e-15	8.6e-12	14	AKT1|BAD|CDKN1A|ELK1|GRB2|GSK3B|JUN|MAP2K1|MAPK1|MAPK3|MTOR|MYC|NRG1|RAF1	86/43622 genes: 0,20%
Th17 cell differentiation	KEGG:hsa04659	6.06e-15	9.2e-12	15	FOS|HSP90AA1|HSP90AB1|IFNG|IL1B|IL2|JUN|MAPK1|MAPK3|MTOR|NFKB1|NFKBIA|RELA|STAT3|TGFB1	107/43622 genes: 0,25%
Dopaminergic synapse	KEGG:hsa04728	6.19e-15	9.39e-12	16	AKT1|CALM1|CALM2|CREB1|DRD2|DRD4|DRD5|FOS|GNG5|GNGT2|GSK3B|ITPR1|PRKACA|SLC18A2|SLC6A3|TH	130/43622 genes: 0,30%
Herpes simplex infection	KEGG:hsa05168	8.14e-15	1.24e-11	18	CASP3|CASP8|CCL2|CDK2|CYCS|FAS|FASLG|FOS|HNRNPK|IFNG|IL1B|JUN|NFKB1|NFKBIA|RELA|TNF|TP53|TRAF6	185/43622 genes: 0,42%
Rheumatoid arthritis	KEGG:hsa05323	9.33e-15	1.42e-11	14	ATP6V0B|ATP6V0C|ATP6V1C1|CCL2|CTSL|CXCL8|FOS|IFNG|IL1B|JUN|TEK|TGFB1|TNF|VEGFA	89/43622 genes: 0,20%
Cholinergic synapse	KEGG:hsa04725	1.22e-14	1.85e-11	15	ACHE|AKT1|BCL2|CHRM2|CREB1|FOS|GNG5|GNGT2|ITPR1|KCNQ2|MAP2K1|MAPK1|MAPK3|PRKACA|SLC5A7	112/43622 genes: 0,26%
Signaling by NOTCH	REACT:R-HSA-157118	1.22e-14	1.85e-11	15	AGO3|CCND1|CREB1|DLL1|E2F1|HDAC3|HDAC6|HEY2|HEYL|JUN|MYC|RBX1|TP53|UBB|UBC	112/43622 genes: 0,26%
Post-translational protein modification	REACT:R-HSA-597592	1.53e-14	2.33e-11	37	ALPL|AR|ARF3|BECN1|CALM1|CALM2|CDKN2A|COPE|EEF1A1|H2AC20|H2AC6|H2BC9|HNRNPK|HSPA8|MDM2|MDM4|MUC6|MYC|NFKBIA|PCNA|PIGC|PLAUR|PRKN|PSMB1|PSMC4|RIPK1|RTN4RL2|SUMO1|TGFB1|TNFAIP3|TP53|TRAF6|UBA1|UBB|UBC|UCHL1|UCHL5	1037/43622 genes: 2,38%
Carbon metabolism	KEGG:hsa01200	1.6e-14	2.42e-11	15	ACADS|ACO2|ALDOC|CAT|DLST|ENO1|ENO2|GOT1|GPT|HK1|IDH3A|MTHFR|PDHA1|SDHB|TPI1	114/43622 genes: 0,26%
Insulin signaling pathway	KEGG:hsa04910	1.61e-14	2.45e-11	16	AKT1|BAD|CALM1|CALM2|ELK1|GRB2|GSK3B|HK1|IRS2|MAP2K1|MAPK1|MAPK3|MTOR|PRKACA|PRKCZ|RAF1	138/43622 genes: 0,32%
Transmembrane transport of small molecules	REACT:R-HSA-382551	2.13e-14	3.23e-11	30	ALB|ATP6V0B|ATP6V0C|ATP6V1C1|ATP8A2|CALM1|CALM2|CLCA1|FXYD6|GABRA6|GNG5|GNGT2|HK1|HMOX1|PRKACA|PSMB1|PSMC4|RAF1|SLC17A8|SLC18A2|SLC22A2|SLC40A1|SLC5A5|SLC5A7|SLC6A2|SLC6A3|SLC8A1|TRPM3|UBB|UBC	676/43622 genes: 1,55%
Sphingolipid signaling pathway	KEGG:hsa04071	2.69e-14	4.09e-11	15	ADORA1|AKT1|BAX|BCL2|BID|MAP2K1|MAPK1|MAPK3|NFKB1|PRKCZ|RAF1|RELA|ROCK1|TNF|TP53	118/43622 genes: 0,27%
C-type lectin receptors (CLRs)	REACT:R-HSA-5621481	3.55e-14	5.38e-11	16	CALM1|CALM2|CASP8|IL1B|ITPR1|MUC6|NFKB1|NFKBIA|PRKACA|PSMB1|PSMC4|RAF1|RELA|TRAF6|UBB|UBC	145/43622 genes: 0,33%
Deubiquitination	REACT:R-HSA-5688426	3.62e-14	5.49e-11	21	AR|BECN1|H2AC20|H2AC6|H2BC9|MDM2|MDM4|MYC|NFKBIA|PRKN|PSMB1|PSMC4|RIPK1|TGFB1|TNFAIP3|TP53|TRAF6|UBB|UBC|UCHL1|UCHL5	301/43622 genes: 0,69%
Oncogene Induced Senescence	REACT:R-HSA-2559585	3.68e-14	5.58e-11	10	AGO3|CDKN2A|E2F1|MAPK1|MAPK3|MDM2|MDM4|TP53|UBB|UBC	32/43622 genes: 0,07%
BH3-only proteins associate with and inactivate anti-apoptotic BCL-2 members	REACT:R-HSA-111453	5.48e-14	8.32e-11	7	BAD|BBC3|BCL2|BCL2L1|BCL2L11|BID|PMAIP1	9/43622 genes: 0,02%
Infectious disease	REACT:R-HSA-5663205	6.81e-14	1.03e-10	23	CALM1|CALM2|GRB2|HSP90AA1|HSP90AB1|MAP2K1|MAP2K6|POLR2K|PSMB1|PSMC4|RBX1|RPL12|RPL19|RPL41|RPL8|RPL9|RPS12|RPS15|RPS27|TGFB1|TXNRD1|UBB|UBC	388/43622 genes: 0,89%
Transcriptional misregulation in cancer	KEGG:hsa05202	6.85e-14	1.04e-10	17	ARNT2|BCL2A1|BCL2L1|CCND2|CDKN1A|CXCL8|DDX5|HMGA2|IGF1|ITGAM|MDM2|MEF2C|MYC|NFKB1|PAX5|RELA|TP53	179/43622 genes: 0,41%
Salmonella infection	KEGG:hsa05132	1.45e-13	2.21e-10	13	ACTG1|CASP1|CXCL8|FOS|IFNG|IL1B|JUN|MAPK1|MAPK3|NFKB1|NOS2|RELA|ROCK1	86/43622 genes: 0,20%
Constitutive Signaling by AKT1 E17K in Cancer	REACT:R-HSA-5674400	1.61e-13	2.45e-10	9	AKT1|BAD|CASP9|CDKN1A|CREB1|GSK3B|MDM2|MTOR|NR4A1	25/43622 genes: 0,06%
cGMP-PKG signaling pathway	KEGG:hsa04022	2.24e-13	3.41e-10	16	ADORA1|AKT1|BAD|CALM1|CALM2|CREB1|IRS2|ITPR1|KCNMA1|MAP2K1|MAPK1|MAPK3|MEF2C|RAF1|ROCK1|SLC8A1	163/43622 genes: 0,37%
Longevity regulating pathway	KEGG:hsa04211	2.3e-13	3.49e-10	13	AKT1|BAX|CAT|CREB1|IGF1|IRS2|MTOR|NFKB1|PRKACA|RELA|SIRT1|SOD2|TP53	89/43622 genes: 0,20%
B cell receptor signaling pathway	KEGG:hsa04662	2.65e-13	4.02e-10	12	AKT1|FOS|GRB2|GSK3B|JUN|MAP2K1|MAPK1|MAPK3|NFKB1|NFKBIA|RAF1|RELA	70/43622 genes: 0,16%
GnRH signaling pathway	KEGG:hsa04912	3.58e-13	5.43e-10	13	CALM1|CALM2|ELK1|GRB2|ITPR1|JUN|MAP2K1|MAP2K6|MAPK1|MAPK3|PRKACA|PTK2B|RAF1	92/43622 genes: 0,21%
Choline metabolism in cancer	KEGG:hsa05231	9.44e-13	1.43e-09	13	AKT1|DGKI|FOS|GRB2|JUN|MAP2K1|MAPK1|MAPK3|MTOR|PDGFRA|RAF1|SLC22A2|SLC5A7	99/43622 genes: 0,23%
mTOR signaling pathway	KEGG:hsa04150	1.07e-12	1.62e-09	15	AKT1|ATP6V1C1|DDIT4|GRB2|GSK3B|IGF1|MAP2K1|MAPK1|MAPK3|MTOR|RAF1|RPS6KA2|TNF|WNT1|WNT5A	151/43622 genes: 0,35%
Neutrophil degranulation	REACT:R-HSA-6798695	1.08e-12	1.63e-09	24	ALDOC|ANXA2|APAF1|ATP6V0C|CAMP|CAT|CEP290|EEF1A1|GM2A|GSTP1|HSP90AA1|HSP90AB1|HSPA1B|HSPA8|ITGAM|MAPK1|NFKB1|PLAUR|PSAP|PSEN1|PSMB1|ROCK1|S100A8|S100A9	488/43622 genes: 1,12%
CLEC7A (Dectin-1) signaling	REACT:R-HSA-5607764	1.23e-12	1.86e-09	13	CALM1|CALM2|CASP8|IL1B|ITPR1|NFKB1|NFKBIA|PSMB1|PSMC4|RELA|TRAF6|UBB|UBC	101/43622 genes: 0,23%
Mitotic G2-G2/M phases	REACT:R-HSA-453274	1.47e-12	2.24e-09	16	CDC25C|CDK2|CDK5RAP2|CDKN1A|CEP290|E2F1|HSP90AA1|HSP90AB1|PRKACA|PSMB1|PSMC4|RBX1|TP53|TUBA1A|UBB|UBC	184/43622 genes: 0,42%
Activation of BH3-only proteins	REACT:R-HSA-114452	1.53e-12	2.32e-09	9	AKT1|BAD|BBC3|BCL2|BCL2L11|BID|E2F1|PMAIP1|TP53	31/43622 genes: 0,07%
Longevity regulating pathway - multiple species	KEGG:hsa04213	1.78e-12	2.7e-09	11	AKT1|CAT|HSPA1B|HSPA8|IGF1|IRS2|MTOR|PRKACA|SIRT1|SOD1|SOD2	62/43622 genes: 0,14%
TGF-beta signaling pathway	KEGG:hsa04350	2.55e-12	3.88e-09	12	BMP2|BMP4|IFNG|INHBA|MAPK1|MAPK3|MYC|NOG|RBX1|ROCK1|TGFB1|TNF	84/43622 genes: 0,19%
Renal cell carcinoma	KEGG:hsa05211	3.07e-12	4.66e-09	11	AKT1|ARNT2|GRB2|JUN|MAP2K1|MAPK1|MAPK3|RAF1|RBX1|TGFB1|VEGFA	65/43622 genes: 0,15%
Amphetamine addiction	KEGG:hsa05031	5.15e-12	7.81e-09	11	CALM1|CALM2|CREB1|FOS|JUN|PDYN|PRKACA|SIRT1|SLC18A2|SLC6A3|TH	68/43622 genes: 0,16%
Deregulated CDK5 triggers multiple neurodegenerative pathways in Alzheimer's disease models	REACT:R-HSA-8862803	5.18e-12	7.86e-09	8	BCL2L11|CDC25C|CDK5R1|FASLG|JUN|PRDX1|PRDX2|SOD2	23/43622 genes: 0,05%
Neurodegenerative Diseases	REACT:R-HSA-8863678	5.18e-12	7.86e-09	8	BCL2L11|CDC25C|CDK5R1|FASLG|JUN|PRDX1|PRDX2|SOD2	23/43622 genes: 0,05%
Prion diseases	KEGG:hsa05020	5.21e-12	7.91e-09	9	BAX|ELK1|HSPA5|IL1B|MAP2K1|MAPK1|MAPK3|PRKACA|SOD1	35/43622 genes: 0,08%
Regulation of TP53 Degradation	REACT:R-HSA-6804757	5.21e-12	7.91e-09	9	AKT1|CDK2|CDKN2A|MDM2|MDM4|MTOR|TP53|UBB|UBC	35/43622 genes: 0,08%
Regulation of TP53 Expression and Degradation	REACT:R-HSA-6806003	6.9e-12	1.05e-08	9	AKT1|CDK2|CDKN2A|MDM2|MDM4|MTOR|TP53|UBB|UBC	36/43622 genes: 0,08%
Mitotic G1-G1/S phases	REACT:R-HSA-453279	7.47e-12	1.13e-08	14	AKT1|CCND1|CCND2|CDK2|CDKN1A|CDKN2A|E2F1|MYC|PCNA|PSMB1|PSMC4|RB1|UBB|UBC	143/43622 genes: 0,33%
Amoebiasis	KEGG:hsa05146	1.14e-11	1.74e-08	12	CASP3|CXCL8|IFNG|IL1B|ITGAM|LAMC2|NFKB1|NOS2|PRKACA|RELA|TGFB1|TNF	95/43622 genes: 0,22%
Progesterone-mediated oocyte maturation	KEGG:hsa04914	1.3e-11	1.97e-08	12	AKT1|CDC25C|CDK2|HSP90AA1|HSP90AB1|IGF1|MAP2K1|MAPK1|MAPK3|PRKACA|RAF1|RPS6KA2	96/43622 genes: 0,22%
G2/M Transition	REACT:R-HSA-69275	1.61e-11	2.44e-08	15	CDC25C|CDK2|CDK5RAP2|CDKN1A|CEP290|HSP90AA1|HSP90AB1|PRKACA|PSMB1|PSMC4|RBX1|TP53|TUBA1A|UBB|UBC	182/43622 genes: 0,42%
Oocyte meiosis	KEGG:hsa04114	1.76e-11	2.67e-08	13	AR|CALM1|CALM2|CDC25C|CDK2|IGF1|ITPR1|MAP2K1|MAPK1|MAPK3|PRKACA|RBX1|RPS6KA2	124/43622 genes: 0,28%
Melanogenesis	KEGG:hsa04916	2.4e-11	3.64e-08	12	CALM1|CALM2|CREB1|GSK3B|KIT|MAP2K1|MAPK1|MAPK3|PRKACA|RAF1|WNT1|WNT5A	101/43622 genes: 0,23%
Signaling by Wnt	REACT:R-HSA-195721	2.4e-11	3.64e-08	19	AGO3|AKT1|CALM1|CALM2|GNG5|GNGT2|GSK3B|H2AC20|H2AC6|H2BC9|ITPR1|MYC|PSMB1|PSMC4|RBX1|UBB|UBC|WNT1|WNT5A	336/43622 genes: 0,77%
Activation of caspases through apoptosome-mediated cleavage	REACT:R-HSA-111459	2.67e-11	4.06e-08	5	APAF1|CASP3|CASP7|CASP9|CYCS	5/43622 genes: 0,01%
Cytochrome c-mediated apoptotic response	REACT:R-HSA-111461	2.67e-11	4.06e-08	5	APAF1|CASP3|CASP7|CASP9|CYCS	5/43622 genes: 0,01%
Ub-specific processing proteases	REACT:R-HSA-5689880	2.75e-11	4.17e-08	16	AR|BECN1|H2AC20|H2AC6|H2BC9|MDM2|MDM4|MYC|NFKBIA|PSMB1|PSMC4|RIPK1|TP53|TRAF6|UBB|UBC	223/43622 genes: 0,51%
VEGF signaling pathway	KEGG:hsa04370	2.98e-11	4.52e-08	10	AKT1|BAD|CASP9|KDR|MAP2K1|MAPK1|MAPK3|PTGS2|RAF1|VEGFA	59/43622 genes: 0,14%
Glucose metabolism	REACT:R-HSA-70326	3.72e-11	5.65e-08	11	ALDOC|CALM1|CALM2|ENO1|ENO2|GOT1|HK1|PRKACA|TPI1|UBB|UBC	81/43622 genes: 0,19%
Insulin resistance	KEGG:hsa04931	4.78e-11	7.26e-08	12	AKT1|CREB1|GSK3B|IRS2|MTOR|NFKB1|NFKBIA|PRKCZ|RELA|RPS6KA2|STAT3|TNF	107/43622 genes: 0,25%
TP53 Regulates Transcription of Cell Death Genes	REACT:R-HSA-5633008	6.11e-11	9.28e-08	9	APAF1|BAX|BBC3|BID|BNIP3L|CASP1|FAS|PMAIP1|TP53	45/43622 genes: 0,10%
MAPK targets/ Nuclear events mediated by MAP kinases	REACT:R-HSA-450282	7.89e-11	1.2e-07	8	CREB1|ELK1|FOS|JUN|MAPK1|MAPK3|MEF2C|RPS6KA2	31/43622 genes: 0,07%
Inflammatory bowel disease (IBD)	KEGG:hsa05321	8.14e-11	1.24e-07	10	IFNG|IL1B|IL2|JUN|NFKB1|RELA|STAT3|STAT4|TGFB1|TNF	65/43622 genes: 0,15%
Mitophagy - animal	KEGG:hsa04137	8.14e-11	1.24e-07	10	BCL2L1|BECN1|BNIP3|BNIP3L|E2F1|JUN|PRKN|RELA|TP53|UBB	65/43622 genes: 0,15%
GPCR ligand binding	REACT:R-HSA-500792	8.93e-11	1.36e-07	21	ADORA1|CCL19|CCL21|CHRM2|CXCL10|CXCL8|DRD2|DRD4|DRD5|GNG5|GNGT2|HCRTR1|KISS1|NPS|P2RY4|PDYN|PNOC|PSAP|TSHB|WNT1|WNT5A	454/43622 genes: 1,04%
Gap junction	KEGG:hsa04540	9.37e-11	1.42e-07	11	DRD2|GRB2|ITPR1|MAP2K1|MAPK1|MAPK3|PDGFRA|PRKACA|RAF1|TUBA1A|TUBA1B	88/43622 genes: 0,20%
Nucleotide-binding domain, leucine rich repeat containing receptor (NLR) signaling pathways	REACT:R-HSA-168643	1.13e-10	1.72e-07	9	BCL2|BCL2L1|CASP1|CASP8|CASP9|HSP90AB1|MAP2K6|TNFAIP3|TRAF6	48/43622 genes: 0,11%
Phospholipase D signaling pathway	KEGG:hsa04072	1.28e-10	1.95e-07	13	AKT1|CXCL8|DGKI|DNM2|GRB2|KIT|MAP2K1|MAPK1|MAPK3|MTOR|PDGFRA|PTK2B|RAF1	145/43622 genes: 0,33%
Th1 and Th2 cell differentiation	KEGG:hsa04658	1.53e-10	2.32e-07	11	DLL1|FOS|IFNG|IL2|JUN|MAPK1|MAPK3|NFKB1|NFKBIA|RELA|STAT4	92/43622 genes: 0,21%
G1/S Transition	REACT:R-HSA-69206	1.68e-10	2.56e-07	12	AKT1|CCND1|CDK2|CDKN1A|E2F1|MYC|PCNA|PSMB1|PSMC4|RB1|UBB|UBC	119/43622 genes: 0,27%
RIG-I-like receptor signaling pathway	KEGG:hsa04622	1.74e-10	2.65e-07	10	ATG12|CASP8|CXCL10|CXCL8|NFKB1|NFKBIA|RELA|RIPK1|TNF|TRAF6	70/43622 genes: 0,16%
Cyclin E associated events during G1/S transition	REACT:R-HSA-69202	2.33e-10	3.53e-07	10	AKT1|CCND1|CDK2|CDKN1A|MYC|PSMB1|PSMC4|RB1|UBB|UBC	72/43622 genes: 0,17%
Hippo signaling pathway	KEGG:hsa04390	2.73e-10	4.14e-07	13	ACTG1|BBC3|BMP2|BMP4|CCND1|CCND2|GSK3B|MYC|PRKCZ|SERPINE1|TGFB1|WNT1|WNT5A	154/43622 genes: 0,35%
p75 NTR receptor-mediated signalling	REACT:R-HSA-193704	2.74e-10	4.15e-07	11	BAD|BCL2L11|CASP3|HDAC3|NFKB1|NFKBIA|RELA|RTN4|TRAF6|UBB|UBC	97/43622 genes: 0,22%
Thyroid hormone synthesis	KEGG:hsa04918	3.07e-10	4.67e-07	10	ALB|CREB1|GPX1|GSR|HSPA5|ITPR1|PRKACA|SLC5A5|TPO|TSHB	74/43622 genes: 0,17%
AKT phosphorylates targets in the cytosol	REACT:R-HSA-198323	3.33e-10	5.06e-07	6	AKT1|BAD|CASP9|CDKN1A|GSK3B|MDM2	13/43622 genes: 0,03%
HSF1-dependent transactivation	REACT:R-HSA-3371571	3.4e-10	5.16e-07	7	FKBP4|HSF1|HSP90AA1|HSP90AB1|HSPA1B|HSPA8|MTOR	23/43622 genes: 0,05%
Apoptotic factor-mediated response	REACT:R-HSA-111471	5.54e-10	8.41e-07	5	APAF1|CASP3|CASP7|CASP9|CYCS	7/43622 genes: 0,02%
Natural killer cell mediated cytotoxicity	KEGG:hsa04650	5.67e-10	8.6e-07	12	BID|CASP3|FAS|FASLG|GRB2|IFNG|MAP2K1|MAPK1|MAPK3|PTK2B|RAF1|TNF	132/43622 genes: 0,30%
Platelet degranulation	REACT:R-HSA-114608	5.67e-10	8.6e-07	12	ALB|CALM1|CALM2|CLU|HSPA5|IGF1|PCDH7|PSAP|SERPINE1|SOD1|TGFB1|VEGFA	132/43622 genes: 0,30%
NF-kB is activated and signals survival	REACT:R-HSA-209560	5.8e-10	8.8e-07	6	NFKB1|NFKBIA|RELA|TRAF6|UBB|UBC	14/43622 genes: 0,03%
Cyclin D associated events in G1	REACT:R-HSA-69231	5.83e-10	8.85e-07	8	CCND1|CCND2|CDKN1A|CDKN2A|E2F1|RB1|UBB|UBC	39/43622 genes: 0,09%
G1 Phase	REACT:R-HSA-69236	5.83e-10	8.85e-07	8	CCND1|CCND2|CDKN1A|CDKN2A|E2F1|RB1|UBB|UBC	39/43622 genes: 0,09%
Constitutive Signaling by NOTCH1 HD+PEST Domain Mutants	REACT:R-HSA-2894862	6.73e-10	1.02e-06	9	DLL1|HDAC3|HDAC6|HEY2|HEYL|MYC|RBX1|UBB|UBC	58/43622 genes: 0,13%
Constitutive Signaling by NOTCH1 PEST Domain Mutants	REACT:R-HSA-2644606	6.73e-10	1.02e-06	9	DLL1|HDAC3|HDAC6|HEY2|HEYL|MYC|RBX1|UBB|UBC	58/43622 genes: 0,13%
Signaling by NOTCH1 HD+PEST Domain Mutants in Cancer	REACT:R-HSA-2894858	6.73e-10	1.02e-06	9	DLL1|HDAC3|HDAC6|HEY2|HEYL|MYC|RBX1|UBB|UBC	58/43622 genes: 0,13%
Signaling by NOTCH1 in Cancer	REACT:R-HSA-2644603	6.73e-10	1.02e-06	9	DLL1|HDAC3|HDAC6|HEY2|HEYL|MYC|RBX1|UBB|UBC	58/43622 genes: 0,13%
Signaling by NOTCH1 PEST Domain Mutants in Cancer	REACT:R-HSA-2644602	6.73e-10	1.02e-06	9	DLL1|HDAC3|HDAC6|HEY2|HEYL|MYC|RBX1|UBB|UBC	58/43622 genes: 0,13%
Class A/1 (Rhodopsin-like receptors)	REACT:R-HSA-373076	7.81e-10	1.19e-06	17	ADORA1|CCL19|CCL21|CHRM2|CXCL10|CXCL8|DRD2|DRD4|DRD5|HCRTR1|KISS1|NPS|P2RY4|PDYN|PNOC|PSAP|TSHB	322/43622 genes: 0,74%
Response to elevated platelet cytosolic Ca2+	REACT:R-HSA-76005	8.72e-10	1.32e-06	12	ALB|CALM1|CALM2|CLU|HSPA5|IGF1|PCDH7|PSAP|SERPINE1|SOD1|TGFB1|VEGFA	137/43622 genes: 0,31%
Attenuation phase	REACT:R-HSA-3371568	9.6e-10	1.46e-06	6	FKBP4|HSF1|HSP90AA1|HSP90AB1|HSPA1B|HSPA8	15/43622 genes: 0,03%
Opioid Signalling	REACT:R-HSA-111885	1.1e-09	1.67e-06	10	CALM1|CALM2|CREB1|GNG5|GNGT2|ITPR1|MAPK1|PDE1B|PDYN|PRKACA	84/43622 genes: 0,19%
RIG-I/MDA5 mediated induction of IFN-alpha/beta pathways	REACT:R-HSA-168928	1.1e-09	1.67e-06	10	ATG12|CASP8|NFKB1|NFKBIA|RELA|RIPK1|TNFAIP3|TRAF6|UBB|UBC	84/43622 genes: 0,19%
Serotonergic synapse	KEGG:hsa04726	1.3e-09	1.98e-06	11	CASP3|GNG5|GNGT2|ITPR1|MAP2K1|MAPK1|MAPK3|PRKACA|PTGS2|RAF1|SLC18A2	112/43622 genes: 0,26%
Wnt signaling pathway	KEGG:hsa04310	1.43e-09	2.17e-06	12	CACYBP|CCND1|CCND2|GSK3B|JUN|MYC|PRKACA|PSEN1|RBX1|TP53|WNT1|WNT5A	143/43622 genes: 0,33%
Cytosolic DNA-sensing pathway	KEGG:hsa04623	1.45e-09	2.19e-06	9	CASP1|CXCL10|IL1B|NFKB1|NFKBIA|POLR1C|POLR2K|RELA|RIPK1	63/43622 genes: 0,14%
RHO GTPase Effectors	REACT:R-HSA-195258	1.6e-09	2.43e-06	16	ACTG1|AR|CALM1|CALM2|CDC25C|GRB2|H2AC20|H2AC6|H2BC9|LIMK2|MAPK1|MAPK3|NCF1|NOX1|ROCK1|RPS27	294/43622 genes: 0,67%
p53-Dependent G1 DNA Damage Response	REACT:R-HSA-69563	1.93e-09	2.92e-06	9	CDK2|CDKN1A|MDM2|MDM4|PSMB1|PSMC4|TP53|UBB|UBC	65/43622 genes: 0,15%
p53-Dependent G1/S DNA damage checkpoint	REACT:R-HSA-69580	1.93e-09	2.92e-06	9	CDK2|CDKN1A|MDM2|MDM4|PSMB1|PSMC4|TP53|UBB|UBC	65/43622 genes: 0,15%
Renin secretion	KEGG:hsa04924	1.93e-09	2.92e-06	9	ADORA1|CALM1|CALM2|CLCA1|CREB1|ITPR1|KCNMA1|PDE1B|PRKACA	65/43622 genes: 0,15%
Calcium signaling pathway	KEGG:hsa04020	2e-09	3.04e-06	13	CACNA1E|CALM1|CALM2|CHRM2|DRD5|ITPR1|NOS2|PDE1B|PDGFRA|PLCE1|PRKACA|PTK2B|SLC8A1	181/43622 genes: 0,41%
Beta-catenin independent WNT signaling	REACT:R-HSA-3858494	2.29e-09	3.48e-06	12	AGO3|CALM1|CALM2|GNG5|GNGT2|ITPR1|PSMB1|PSMC4|UBB|UBC|WNT1|WNT5A	149/43622 genes: 0,34%
p75NTR signals via NF-kB	REACT:R-HSA-193639	2.34e-09	3.56e-06	6	NFKB1|NFKBIA|RELA|TRAF6|UBB|UBC	17/43622 genes: 0,04%
Type II diabetes mellitus	KEGG:hsa04930	2.36e-09	3.58e-06	8	CACNA1E|HK1|IRS2|MAPK1|MAPK3|MTOR|PRKCZ|TNF	46/43622 genes: 0,11%
G1/S DNA Damage Checkpoints	REACT:R-HSA-69615	2.54e-09	3.86e-06	9	CDK2|CDKN1A|MDM2|MDM4|PSMB1|PSMC4|TP53|UBB|UBC	67/43622 genes: 0,15%
Long-term potentiation	KEGG:hsa04720	2.54e-09	3.86e-06	9	CALM1|CALM2|ITPR1|MAP2K1|MAPK1|MAPK3|PRKACA|RAF1|RPS6KA2	67/43622 genes: 0,15%
Epithelial cell signaling in Helicobacter pylori infection	KEGG:hsa05120	2.91e-09	4.42e-06	9	ATP6V0B|ATP6V0C|ATP6V1C1|CASP3|CXCL8|JUN|NFKB1|NFKBIA|RELA	68/43622 genes: 0,16%
NOTCH1 Intracellular Domain Regulates Transcription	REACT:R-HSA-2122947	3.37e-09	5.11e-06	8	HDAC3|HDAC6|HEY2|HEYL|MYC|RBX1|UBB|UBC	48/43622 genes: 0,11%
Uptake and actions of bacterial toxins	REACT:R-HSA-5339562	3.46e-09	5.25e-06	7	CALM1|CALM2|HSP90AA1|HSP90AB1|MAP2K1|MAP2K6|TXNRD1	31/43622 genes: 0,07%
Apoptotic machinery	KEGG:hsa_M00685	3.5e-09	5.31e-06	4	APAF1|CASP3|CASP7|CASP9	4/43622 genes: 0,01%
Regulation of HSF1-mediated heat shock response	REACT:R-HSA-3371453	3.79e-09	5.75e-06	9	DNAJB6|GSK3B|HSF1|HSPA1B|HSPA5|HSPA8|MAPK1|MAPK3|SIRT1	70/43622 genes: 0,16%
Interleukin-10 signaling	REACT:R-HSA-6783783	4e-09	6.07e-06	8	CCL19|CCL2|CXCL10|CXCL8|IL1B|PTGS2|STAT3|TNF	49/43622 genes: 0,11%
TP53 Regulates Transcription of Cell Cycle Genes	REACT:R-HSA-6791312	4e-09	6.07e-06	8	BAX|CDC25C|CDK2|CDKN1A|E2F1|GADD45A|PCNA|TP53	49/43622 genes: 0,11%
Circadian entrainment	KEGG:hsa04713	4.15e-09	6.3e-06	10	CALM1|CALM2|CREB1|FOS|GNG5|GNGT2|ITPR1|MAPK1|MAPK3|PRKACA	96/43622 genes: 0,22%
Cyclin A:Cdk2-associated events at S phase entry	REACT:R-HSA-69656	4.31e-09	6.54e-06	9	CCND1|CDK2|CDKN1A|MYC|PSMB1|PSMC4|RB1|UBB|UBC	71/43622 genes: 0,16%
Eukaryotic Translation Elongation	REACT:R-HSA-156842	4.6e-09	6.98e-06	10	EEF1A1|EEF1G|RPL12|RPL19|RPL41|RPL8|RPL9|RPS12|RPS15|RPS27	97/43622 genes: 0,22%
Death Receptor Signalling	REACT:R-HSA-73887	4.73e-09	7.18e-06	8	CASP8|FAS|FASLG|RIPK1|TNF|TNFAIP3|UBB|UBC	50/43622 genes: 0,11%
Signaling by NOTCH1	REACT:R-HSA-1980143	5.54e-09	8.41e-06	9	DLL1|HDAC3|HDAC6|HEY2|HEYL|MYC|RBX1|UBB|UBC	73/43622 genes: 0,17%
Regulation of TP53 Activity	REACT:R-HSA-5633007	5.93e-09	9.01e-06	12	AKT1|CDK2|CDK5R1|CDKN2A|MAP2K6|MBD3|MDM2|MDM4|MTOR|TP53|UBB|UBC	162/43622 genes: 0,37%
Oxidative phosphorylation	KEGG:hsa00190	8.11e-09	1.23e-05	11	ATP6V0B|ATP6V0C|ATP6V1C1|COX5A|COX6A1|COX6B1|COX7A2|COX7A2L|CYC1|SDHB|UQCRC1	133/43622 genes: 0,30%
Glutathione metabolism	KEGG:hsa00480	8.92e-09	1.35e-05	8	GCLC|GPX1|GPX4|GSR|GSTA3|GSTA4|GSTP1|ODC1	54/43622 genes: 0,12%
Antigen processing and presentation	KEGG:hsa04612	8.96e-09	1.36e-05	9	CREB1|CTSL|HSP90AA1|HSP90AB1|HSPA1B|HSPA5|HSPA8|IFNG|TNF	77/43622 genes: 0,18%
TP53 Regulates Transcription of Genes Involved in Cytochrome C Release	REACT:R-HSA-6803204	1e-08	1.52e-05	6	BAX|BBC3|BID|BNIP3L|PMAIP1|TP53	21/43622 genes: 0,05%
The citric acid (TCA) cycle and respiratory electron transport	REACT:R-HSA-1428517	1.02e-08	1.55e-05	12	ACO2|COX5A|COX6A1|COX6B1|COX7A2L|CYC1|CYCS|DLST|IDH3A|PDHA1|SDHB|UQCRC1	170/43622 genes: 0,39%
Ion channel transport	REACT:R-HSA-983712	1.14e-08	1.73e-05	13	ATP6V0B|ATP6V0C|ATP6V1C1|ATP8A2|CALM1|CALM2|CLCA1|FXYD6|GABRA6|RAF1|TRPM3|UBB|UBC	209/43622 genes: 0,48%
Post NMDA receptor activation events	REACT:R-HSA-438064	1.3e-08	1.98e-05	7	CALM1|CALM2|CREB1|MAPK1|PRKACA|RAF1|RPS6KA2	37/43622 genes: 0,08%
Viral myocarditis	KEGG:hsa05416	1.6e-08	2.43e-05	8	ACTG1|BID|CASP3|CASP8|CASP9|CCND1|CYCS|EIF4G2	58/43622 genes: 0,13%
HSF1 activation	REACT:R-HSA-3371511	2.02e-08	3.07e-05	5	EEF1A1|HDAC6|HSF1|HSP90AA1|HSP90AB1	12/43622 genes: 0,03%
Neurotransmitter Receptor Binding And Downstream Transmission In The Postsynaptic Cell	REACT:R-HSA-112314	2.15e-08	3.27e-05	11	CALM1|CALM2|CREB1|GABRA6|GNG5|GNGT2|MAPK1|MDM2|PRKACA|RAF1|RPS6KA2	146/43622 genes: 0,33%
Negative regulation of MAPK pathway	REACT:R-HSA-5675221	2.31e-08	3.51e-05	7	MAP2K1|MAPK1|MAPK3|PEBP1|RAF1|UBB|UBC	40/43622 genes: 0,09%
The role of GTSE1 in G2/M progression after G2 checkpoint	REACT:R-HSA-8852276	2.41e-08	3.66e-05	8	CDKN1A|HSP90AA1|HSP90AB1|PSMB1|PSMC4|TP53|UBB|UBC	61/43622 genes: 0,14%
PI5P, PP2A and IER3 Regulate PI3K/AKT Signaling	REACT:R-HSA-6811558	2.66e-08	4.04e-05	9	AKT1|FGFR3|GRB2|IRS2|KIT|MAPK1|MAPK3|NRG1|PDGFRA	87/43622 genes: 0,20%
Activation of NMDA receptor upon glutamate binding and postsynaptic events	REACT:R-HSA-442755	2.77e-08	4.2e-05	7	CALM1|CALM2|CREB1|MAPK1|PRKACA|RAF1|RPS6KA2	41/43622 genes: 0,09%
Metabolism of lipids and lipoproteins	REACT:R-HSA-556833	3.03e-08	4.59e-05	24	ACADS|ACHE|ALB|AMN|ARF3|ARNT2|CDIPT|CROT|CYP1A1|CYP1A2|DBI|GM2A|GPX1|GPX4|HDAC3|HSD11B2|MBOAT2|PGS1|PRKACA|PSAP|PTGES|PTGS2|TECR|TXNRD1	814/43622 genes: 1,87%
Synaptic vesicle cycle	KEGG:hsa04721	3.13e-08	4.74e-05	8	ATP6V0B|ATP6V0C|ATP6V1C1|CPLX1|DNM2|SLC17A8|SLC18A2|UNC13C	63/43622 genes: 0,14%
Nuclear Events (kinase and transcription factor activation)	REACT:R-HSA-198725	3.18e-08	4.83e-05	6	CREB1|ELK1|MAPK1|MAPK3|MEF2C|RPS6KA2	25/43622 genes: 0,06%
Cell cycle - G1/S transition	KEGG:hsa_M00692	3.27e-08	4.96e-05	5	CCND1|CCND2|CDK2|E2F1|RB1	13/43622 genes: 0,03%
Vascular smooth muscle contraction	KEGG:hsa04270	3.93e-08	5.96e-05	10	CALM1|CALM2|ITPR1|KCNMA1|MAP2K1|MAPK1|MAPK3|PRKACA|RAF1|ROCK1	121/43622 genes: 0,28%
Platelet homeostasis	REACT:R-HSA-418346	3.96e-08	6.01e-05	9	CALM1|CALM2|GNG5|GNGT2|ITPR1|KCNMA1|NOS2|PDE1B|SLC8A1	91/43622 genes: 0,21%
Shigellosis	KEGG:hsa05131	4.02e-08	6.1e-05	8	ACTG1|CXCL8|MAPK1|MAPK3|NFKB1|NFKBIA|RELA|ROCK1	65/43622 genes: 0,15%
Selenoamino acid metabolism	REACT:R-HSA-2408522	4.25e-08	6.45e-05	10	GSR|RPL12|RPL19|RPL41|RPL8|RPL9|RPS12|RPS15|RPS27|TXNRD1	122/43622 genes: 0,28%
Peptide chain elongation	REACT:R-HSA-156902	4.36e-08	6.62e-05	9	EEF1A1|RPL12|RPL19|RPL41|RPL8|RPL9|RPS12|RPS15|RPS27	92/43622 genes: 0,21%
Influenza Infection	REACT:R-HSA-168254	4.56e-08	6.92e-05	11	HSP90AA1|POLR2K|RPL12|RPL19|RPL41|RPL8|RPL9|RPS12|RPS15|RPS27|TGFB1	157/43622 genes: 0,36%
Fc epsilon RI signaling pathway	KEGG:hsa04664	5.12e-08	7.78e-05	8	AKT1|GRB2|MAP2K1|MAP2K6|MAPK1|MAPK3|RAF1|TNF	67/43622 genes: 0,15%
Signaling by PTK6	REACT:R-HSA-8848021	5.12e-08	7.78e-05	8	AKT1|CCND1|CDK2|LRRK2|NRG1|STAT3|UBB|UBC	67/43622 genes: 0,15%
CLEC7A/inflammasome pathway	REACT:R-HSA-5660668	5.19e-08	7.87e-05	4	CASP8|IL1B|NFKB1|RELA	6/43622 genes: 0,01%
Negative feedback regulation of MAPK pathway	REACT:R-HSA-5674499	5.19e-08	7.87e-05	4	MAP2K1|MAPK1|MAPK3|RAF1	6/43622 genes: 0,01%
Negative regulation of the PI3K/AKT network	REACT:R-HSA-199418	5.27e-08	7.99e-05	9	AKT1|FGFR3|GRB2|IRS2|KIT|MAPK1|MAPK3|NRG1|PDGFRA	94/43622 genes: 0,22%
TCF dependent signaling in response to WNT	REACT:R-HSA-201681	5.29e-08	8.02e-05	13	AKT1|GSK3B|H2AC20|H2AC6|H2BC9|MYC|PSMB1|PSMC4|RBX1|UBB|UBC|WNT1|WNT5A	238/43622 genes: 0,55%
Cytosolic sensors of pathogen-associated DNA	REACT:R-HSA-1834949	5.77e-08	8.76e-05	8	NFKB1|NFKBIA|POLR1C|POLR2K|RELA|RIPK1|UBB|UBC	68/43622 genes: 0,16%
Interleukin-1 signaling	REACT:R-HSA-446652	6.38e-08	9.68e-05	7	IL1B|MAP2K1|MAP2K6|NFKB1|TRAF6|UBB|UBC	46/43622 genes: 0,11%
Adipocytokine signaling pathway	KEGG:hsa04920	6.48e-08	9.84e-05	8	AKT1|IRS2|MTOR|NFKB1|NFKBIA|RELA|STAT3|TNF	69/43622 genes: 0,16%
Cell Cycle Checkpoints	REACT:R-HSA-69620	6.56e-08	9.96e-05	12	CDC25C|CDK2|CDKN1A|H2BC9|MDM2|MDM4|PSMB1|PSMC4|SUMO1|TP53|UBB|UBC	201/43622 genes: 0,46%
Caspase activation via extrinsic apoptotic signalling pathway	REACT:R-HSA-5357769	6.64e-08	0.000101	6	CASP3|CASP8|CASP9|FAS|FASLG|RIPK1	28/43622 genes: 0,06%
G alpha (i) signalling events	REACT:R-HSA-418594	6.74e-08	0.000102	13	ADORA1|CCL19|CCL21|CHRM2|CXCL10|CXCL8|DRD2|DRD4|GNG5|GNGT2|P2RY4|PDYN|PNOC	243/43622 genes: 0,56%
PLC beta mediated events	REACT:R-HSA-112043	7.44e-08	0.000113	7	CALM1|CALM2|CREB1|ITPR1|MAPK1|PDE1B|PRKACA	47/43622 genes: 0,11%
S Phase	REACT:R-HSA-69242	7.78e-08	0.000118	10	CCND1|CDK2|CDKN1A|MYC|PCNA|PSMB1|PSMC4|RB1|UBB|UBC	130/43622 genes: 0,30%
Protein processing in endoplasmic reticulum	KEGG:hsa04141	8.08e-08	0.000123	11	BAK1|BAX|BCL2|HSP90AA1|HSP90AB1|HSPA1B|HSPA5|HSPA8|NFE2L2|PRKN|RBX1	166/43622 genes: 0,38%
CREB phosphorylation through the activation of Ras	REACT:R-HSA-442742	8.32e-08	0.000126	6	CALM1|CALM2|CREB1|MAPK1|RAF1|RPS6KA2	29/43622 genes: 0,07%
Negative regulation of FGFR3 signaling	REACT:R-HSA-5654732	8.32e-08	0.000126	6	FGFR3|GRB2|MAPK1|MAPK3|UBB|UBC	29/43622 genes: 0,07%
Thyroid cancer	KEGG:hsa05216	8.32e-08	0.000126	6	CCND1|MAP2K1|MAPK1|MAPK3|MYC|TP53	29/43622 genes: 0,07%
G-protein mediated events	REACT:R-HSA-112040	8.66e-08	0.000131	7	CALM1|CALM2|CREB1|ITPR1|MAPK1|PDE1B|PRKACA	48/43622 genes: 0,11%
Amyloid fiber formation	REACT:R-HSA-977225	9.86e-08	0.00015	9	H2AC20|H2AC6|H2BC9|MFGE8|PRKN|PRL|SNCA|UBB|UBC	101/43622 genes: 0,23%
Retrograde endocannabinoid signaling	KEGG:hsa04723	9.86e-08	0.00015	9	GABRA6|GNG5|GNGT2|ITPR1|MAPK1|MAPK3|PRKACA|PTGS2|SLC17A8	101/43622 genes: 0,23%
Extracellular matrix organization	REACT:R-HSA-1474244	1.01e-07	0.000154	14	BMP2|BMP4|CAPN11|CASP3|CTSL|ITGAM|ITGB8|KDR|LAMC2|LRP4|PSEN1|SERPINE1|TGFB1|TNR	297/43622 genes: 0,68%
Ca-dependent events	REACT:R-HSA-111996	1.03e-07	0.000157	6	CALM1|CALM2|CREB1|MAPK1|PDE1B|PRKACA	30/43622 genes: 0,07%
Spry regulation of FGF signaling	REACT:R-HSA-1295596	1.09e-07	0.000165	5	GRB2|MAPK1|MAPK3|UBB|UBC	16/43622 genes: 0,04%
Regulation of actin cytoskeleton	KEGG:hsa04810	1.17e-07	0.000178	12	ACTG1|CHRM2|FGFR3|ITGAM|ITGB8|LIMK2|MAP2K1|MAPK1|MAPK3|PDGFRA|RAF1|ROCK1	212/43622 genes: 0,49%
Interleukin-1 processing	REACT:R-HSA-448706	1.2e-07	0.000183	4	CASP1|IL1B|NFKB1|RELA	7/43622 genes: 0,02%
Biosynthesis of amino acids	KEGG:hsa01230	1.26e-07	0.000191	8	ACO2|ALDOC|ENO1|ENO2|GOT1|GPT|IDH3A|TPI1	75/43622 genes: 0,17%
Influenza Viral RNA Transcription and Replication	REACT:R-HSA-168273	1.28e-07	0.000194	10	HSP90AA1|POLR2K|RPL12|RPL19|RPL41|RPL8|RPL9|RPS12|RPS15|RPS27	137/43622 genes: 0,31%
GPCR downstream signaling	REACT:R-HSA-388396	1.3e-07	0.000197	26	ADORA1|AKT1|CCL19|CCL21|CHRM2|CXCL10|CXCL8|DGKI|DRD2|DRD4|DRD5|GNG5|GNGT2|GPR27|GRB2|HCRTR1|IL2|ITPR1|KISS1|NPS|P2RY4|PDE1B|PDYN|PNOC|ROCK1|TSHB	1016/43622 genes: 2,33%
UCH proteinases	REACT:R-HSA-5689603	1.38e-07	0.00021	9	H2AC20|H2AC6|PSMB1|PSMC4|TGFB1|UBB|UBC|UCHL1|UCHL5	105/43622 genes: 0,24%
Axon guidance	KEGG:hsa04360	1.38e-07	0.00021	11	EFNB1|GSK3B|LIMK2|MAPK1|MAPK3|NTN1|PRKCZ|RAF1|ROCK1|SEMA4D|WNT5A	175/43622 genes: 0,40%
Endocytosis	KEGG:hsa04144	1.48e-07	0.000224	13	ARF3|DNM2|FGFR3|HSPA1B|HSPA8|KDR|KIT|MDM2|PDGFRA|PRKCZ|TGFB1|TRAF6|VPS45	260/43622 genes: 0,60%
Regulation of DNA replication	REACT:R-HSA-69304	1.55e-07	0.000235	8	CDK2|CDKN1A|E2F1|PSMB1|PSMC4|RB1|UBB|UBC	77/43622 genes: 0,18%
Gluconeogenesis	REACT:R-HSA-70263	1.56e-07	0.000236	6	ALDOC|ENO1|ENO2|GOT1|PRKACA|TPI1	32/43622 genes: 0,07%
NOD1/2 Signaling Pathway	REACT:R-HSA-168638	1.56e-07	0.000236	6	CASP1|CASP8|CASP9|MAP2K6|TNFAIP3|TRAF6	32/43622 genes: 0,07%
Cardiac muscle contraction	KEGG:hsa04260	1.71e-07	0.00026	8	COX5A|COX6A1|COX6B1|COX7A2|COX7A2L|CYC1|SLC8A1|UQCRC1	78/43622 genes: 0,18%
Regulation of TNFR1 signaling	REACT:R-HSA-5357905	1.89e-07	0.000287	6	CASP8|RIPK1|TNF|TNFAIP3|UBB|UBC	33/43622 genes: 0,08%
DNA Damage/Telomere Stress Induced Senescence	REACT:R-HSA-2559586	1.89e-07	0.000287	8	CDK2|CDKN1A|H2AC20|H2AC6|H2BC9|HMGA2|RB1|TP53	79/43622 genes: 0,18%
DNA Replication	REACT:R-HSA-69306	1.91e-07	0.00029	9	CDK2|CDKN1A|E2F1|PCNA|PSMB1|PSMC4|RB1|UBB|UBC	109/43622 genes: 0,25%
Amine-derived hormones	REACT:R-HSA-209776	2.11e-07	0.00032	5	DIO1|SLC5A5|TH|TPO|TSHB	18/43622 genes: 0,04%
DAG and IP3 signaling	REACT:R-HSA-1489509	2.28e-07	0.000346	6	CALM1|CALM2|CREB1|ITPR1|PDE1B|PRKACA	34/43622 genes: 0,08%
Influenza Life Cycle	REACT:R-HSA-168255	2.32e-07	0.000352	10	HSP90AA1|POLR2K|RPL12|RPL19|RPL41|RPL8|RPL9|RPS12|RPS15|RPS27	146/43622 genes: 0,33%
MAPK (ERK1/2) signaling	KEGG:hsa_M00687	2.39e-07	0.000363	4	MAP2K1|MAPK1|MAPK3|RAF1	8/43622 genes: 0,02%
Stabilization of p53	REACT:R-HSA-69541	2.59e-07	0.000393	7	MDM2|MDM4|PSMB1|PSMC4|TP53|UBB|UBC	56/43622 genes: 0,13%
Signaling by Rho GTPases	REACT:R-HSA-194315	2.67e-07	0.000406	16	ACTG1|AR|CALM1|CALM2|CDC25C|GRB2|H2AC20|H2AC6|H2BC9|LIMK2|MAPK1|MAPK3|NCF1|NOX1|ROCK1|RPS27	425/43622 genes: 0,97%
TP53 Regulates Transcription of Genes Involved in G2 Cell Cycle Arrest	REACT:R-HSA-6804114	2.84e-07	0.000431	5	BAX|CDC25C|GADD45A|PCNA|TP53	19/43622 genes: 0,04%
EGFR interacts with phospholipase C-gamma	REACT:R-HSA-212718	3.26e-07	0.000495	6	CALM1|CALM2|CREB1|ITPR1|PDE1B|PRKACA	36/43622 genes: 0,08%
PLC-gamma1 signalling	REACT:R-HSA-167021	3.26e-07	0.000495	6	CALM1|CALM2|CREB1|ITPR1|PDE1B|PRKACA	36/43622 genes: 0,08%
FCERI mediated NF-kB activation	REACT:R-HSA-2871837	3.35e-07	0.000509	8	NFKB1|NFKBIA|PSMB1|PSMC4|RELA|TRAF6|UBB|UBC	85/43622 genes: 0,19%
Phagosome	KEGG:hsa04145	3.58e-07	0.000544	10	ACTG1|ATP6V0B|ATP6V0C|ATP6V1C1|CTSL|ITGAM|NCF1|NOX1|TUBA1A|TUBA1B	153/43622 genes: 0,35%
Regulation of TP53 Activity through Methylation	REACT:R-HSA-6804760	3.77e-07	0.000572	5	MDM2|MDM4|TP53|UBB|UBC	20/43622 genes: 0,05%
Ovarian tumor domain proteases	REACT:R-HSA-5689896	3.86e-07	0.000586	6	RIPK1|TNFAIP3|TP53|TRAF6|UBB|UBC	37/43622 genes: 0,08%
Nonsense-Mediated Decay (NMD)	REACT:R-HSA-927802	4.34e-07	0.000659	9	RPL12|RPL19|RPL41|RPL8|RPL9|RPS12|RPS15|RPS27|UPF3B	120/43622 genes: 0,28%
Nonsense Mediated Decay (NMD) enhanced by the Exon Junction Complex (EJC)	REACT:R-HSA-975957	4.34e-07	0.000659	9	RPL12|RPL19|RPL41|RPL8|RPL9|RPS12|RPS15|RPS27|UPF3B	120/43622 genes: 0,28%
SLC-mediated transmembrane transport	REACT:R-HSA-425407	4.38e-07	0.000665	13	ALB|CALM1|CALM2|HK1|SLC17A8|SLC18A2|SLC22A2|SLC40A1|SLC5A5|SLC5A7|SLC6A2|SLC6A3|SLC8A1	286/43622 genes: 0,66%
Formation of apoptosome	REACT:R-HSA-111458	4.57e-07	0.000694	3	APAF1|CASP9|CYCS	3/43622 genes: 0,01%
Ca2+ pathway	REACT:R-HSA-4086398	4.71e-07	0.000715	7	AGO3|CALM1|CALM2|GNG5|GNGT2|ITPR1|WNT5A	61/43622 genes: 0,14%
Degradation of GLI2 by the proteasome	REACT:R-HSA-5610783	4.71e-07	0.000715	7	GSK3B|PRKACA|PSMB1|PSMC4|RBX1|UBB|UBC	61/43622 genes: 0,14%
GLI3 is processed to GLI3R by the proteasome	REACT:R-HSA-5610785	4.71e-07	0.000715	7	GSK3B|PRKACA|PSMB1|PSMC4|RBX1|UBB|UBC	61/43622 genes: 0,14%
SCF(Skp2)-mediated degradation of p27/p21	REACT:R-HSA-187577	4.71e-07	0.000715	7	CCND1|CDK2|CDKN1A|PSMB1|PSMC4|UBB|UBC	61/43622 genes: 0,14%
Signaling by BRAF and RAF fusions	REACT:R-HSA-6802952	4.71e-07	0.000715	7	BCL2L11|MACF1|MAP2K1|MAPK1|MAPK3|PEBP1|RAF1	61/43622 genes: 0,14%
Signaling by FGFR	REACT:R-HSA-190236	4.79e-07	0.000727	8	FGFR3|GRB2|HNRNPM|MAPK1|MAPK3|POLR2K|UBB|UBC	89/43622 genes: 0,20%
Fc gamma R-mediated phagocytosis	KEGG:hsa04666	5.22e-07	0.000793	8	AKT1|DNM2|LIMK2|MAP2K1|MAPK1|MAPK3|NCF1|RAF1	90/43622 genes: 0,21%
MAPK6/MAPK4 signaling	REACT:R-HSA-5687128	5.22e-07	0.000793	8	AGO3|JUN|MYC|PRKACA|PSMB1|PSMC4|UBB|UBC	90/43622 genes: 0,21%
Ribosome, eukaryotes	KEGG:hsa_M00177	5.69e-07	0.000863	8	RPL12|RPL19|RPL41|RPL8|RPL9|RPS12|RPS15|RPS27	91/43622 genes: 0,21%
Viral mRNA Translation	REACT:R-HSA-192823	6.19e-07	0.000939	8	RPL12|RPL19|RPL41|RPL8|RPL9|RPS12|RPS15|RPS27	92/43622 genes: 0,21%
Signaling by FGFR3	REACT:R-HSA-5654741	6.26e-07	0.00095	6	FGFR3|GRB2|MAPK1|MAPK3|UBB|UBC	40/43622 genes: 0,09%
eNOS activation and regulation	REACT:R-HSA-203765	6.32e-07	0.000959	5	AKT1|CALM1|CALM2|DNM2|HSP90AA1	22/43622 genes: 0,05%
ERK/MAPK targets	REACT:R-HSA-198753	6.32e-07	0.000959	5	ELK1|MAPK1|MAPK3|MEF2C|RPS6KA2	22/43622 genes: 0,05%
Metabolism of nitric oxide	REACT:R-HSA-202131	6.32e-07	0.000959	5	AKT1|CALM1|CALM2|DNM2|HSP90AA1	22/43622 genes: 0,05%
Translation	REACT:R-HSA-72766	6.42e-07	0.000975	10	EEF1A1|EEF1G|RPL12|RPL19|RPL41|RPL8|RPL9|RPS12|RPS15|RPS27	163/43622 genes: 0,37%
Activation of the AP-1 family of transcription factors	REACT:R-HSA-450341	7.08e-07	0.00108	4	FOS|JUN|MAPK1|MAPK3	10/43622 genes: 0,02%
Neurotransmitter Clearance In The Synaptic Cleft	REACT:R-HSA-112311	7.08e-07	0.00108	4	ACHE|ALDH2|SLC22A2|SLC6A3	10/43622 genes: 0,02%
Signal attenuation	REACT:R-HSA-74749	7.08e-07	0.00108	4	GRB2|IRS2|MAPK1|MAPK3	10/43622 genes: 0,02%
Thyroxine biosynthesis	REACT:R-HSA-209968	7.08e-07	0.00108	4	DIO1|SLC5A5|TPO|TSHB	10/43622 genes: 0,02%
Graft-versus-host disease	KEGG:hsa05332	7.28e-07	0.00111	6	FAS|FASLG|IFNG|IL1B|IL2|TNF	41/43622 genes: 0,09%
Selenocysteine synthesis	REACT:R-HSA-2408557	7.92e-07	0.0012	8	RPL12|RPL19|RPL41|RPL8|RPL9|RPS12|RPS15|RPS27	95/43622 genes: 0,22%
Eukaryotic Translation Termination	REACT:R-HSA-72764	8.58e-07	0.0013	8	RPL12|RPL19|RPL41|RPL8|RPL9|RPS12|RPS15|RPS27	96/43622 genes: 0,22%
Glycolysis / Gluconeogenesis	KEGG:hsa00010	9.02e-07	0.00137	7	ALDH2|ALDOC|ENO1|ENO2|HK1|PDHA1|TPI1	67/43622 genes: 0,15%
TNF signaling	REACT:R-HSA-75893	9.74e-07	0.00148	6	CASP8|RIPK1|TNF|TNFAIP3|UBB|UBC	43/43622 genes: 0,10%
Type I diabetes mellitus	KEGG:hsa04940	9.74e-07	0.00148	6	FAS|FASLG|IFNG|IL1B|IL2|TNF	43/43622 genes: 0,10%
Activation of NF-kappaB in B cells	REACT:R-HSA-1169091	9.99e-07	0.00152	7	NFKB1|NFKBIA|PSMB1|PSMC4|RELA|UBB|UBC	68/43622 genes: 0,16%
Semaphorin interactions	REACT:R-HSA-373755	9.99e-07	0.00152	7	CDK5R1|GSK3B|HSP90AA1|HSP90AB1|LIMK2|ROCK1|SEMA4D	68/43622 genes: 0,16%
Cytochrome c oxidase	KEGG:hsa_M00154	1.01e-06	0.00153	5	COX5A|COX6A1|COX6B1|COX7A2|COX7A2L	24/43622 genes: 0,06%
Nonsense Mediated Decay (NMD) independent of the Exon Junction Complex (EJC)	REACT:R-HSA-975956	1.09e-06	0.00165	8	RPL12|RPL19|RPL41|RPL8|RPL9|RPS12|RPS15|RPS27	99/43622 genes: 0,23%
CASP8 activity is inhibited	REACT:R-HSA-5218900	1.11e-06	0.00168	4	CASP8|FAS|FASLG|RIPK1	11/43622 genes: 0,03%
Dimerization of procaspase-8	REACT:R-HSA-69416	1.11e-06	0.00168	4	CASP8|FAS|FASLG|RIPK1	11/43622 genes: 0,03%
Regulation by c-FLIP	REACT:R-HSA-3371378	1.11e-06	0.00168	4	CASP8|FAS|FASLG|RIPK1	11/43622 genes: 0,03%
Glycolysis (Embden-Meyerhof pathway), glucose => pyruvate	KEGG:hsa_M00001	1.25e-06	0.0019	5	ALDOC|ENO1|ENO2|HK1|TPI1	25/43622 genes: 0,06%
Growth hormone receptor signaling	REACT:R-HSA-982772	1.25e-06	0.0019	5	IRS2|MAPK1|MAPK3|PRL|STAT3	25/43622 genes: 0,06%
Downstream TCR signaling	REACT:R-HSA-202424	1.26e-06	0.00192	8	NFKB1|NFKBIA|PSMB1|PSMC4|RELA|TRAF6|UBB|UBC	101/43622 genes: 0,23%
Synthesis of DNA	REACT:R-HSA-69239	1.26e-06	0.00192	8	CDK2|CDKN1A|PCNA|PSMB1|PSMC4|RB1|UBB|UBC	101/43622 genes: 0,23%
Circadian Clock	REACT:R-HSA-400253	1.34e-06	0.00204	7	CREB1|HDAC3|MEF2C|SERPINE1|SIRT1|UBB|UBC	71/43622 genes: 0,16%
Respiratory electron transport	REACT:R-HSA-611105	1.36e-06	0.00207	8	COX5A|COX6A1|COX6B1|COX7A2L|CYC1|CYCS|SDHB|UQCRC1	102/43622 genes: 0,23%
Glucagon signaling pathway	KEGG:hsa04922	1.47e-06	0.00223	8	AKT1|CALM1|CALM2|CREB1|ITPR1|PDHA1|PRKACA|SIRT1	103/43622 genes: 0,24%
Orc1 removal from chromatin	REACT:R-HSA-68949	1.48e-06	0.00224	7	CDK2|CDKN1A|PSMB1|PSMC4|RB1|UBB|UBC	72/43622 genes: 0,17%
Switching of origins to a post-replicative state	REACT:R-HSA-69052	1.48e-06	0.00224	7	CDK2|CDKN1A|PSMB1|PSMC4|RB1|UBB|UBC	72/43622 genes: 0,17%
eNOS activation	REACT:R-HSA-203615	1.65e-06	0.0025	4	AKT1|CALM1|CALM2|HSP90AA1	12/43622 genes: 0,03%
Tetrahydrobiopterin (BH4) synthesis, recycling, salvage and regulation	REACT:R-HSA-1474151	1.65e-06	0.0025	4	AKT1|CALM1|CALM2|HSP90AA1	12/43622 genes: 0,03%
Formation of a pool of free 40S subunits	REACT:R-HSA-72689	1.7e-06	0.00258	8	RPL12|RPL19|RPL41|RPL8|RPL9|RPS12|RPS15|RPS27	105/43622 genes: 0,24%
Removal of licensing factors from origins	REACT:R-HSA-69300	1.78e-06	0.00271	7	CDK2|CDKN1A|PSMB1|PSMC4|RB1|UBB|UBC	74/43622 genes: 0,17%
Oncogenic MAPK signaling	REACT:R-HSA-6802957	1.95e-06	0.00296	7	BCL2L11|MACF1|MAP2K1|MAPK1|MAPK3|PEBP1|RAF1	75/43622 genes: 0,17%
Signaling by FGFR2	REACT:R-HSA-5654738	1.95e-06	0.00296	7	GRB2|HNRNPM|MAPK1|MAPK3|POLR2K|UBB|UBC	75/43622 genes: 0,17%
Adrenergic signaling in cardiomyocytes	KEGG:hsa04261	2.01e-06	0.00305	9	AKT1|BCL2|CALM1|CALM2|CREB1|MAPK1|MAPK3|PRKACA|SLC8A1	144/43622 genes: 0,33%
Malaria	KEGG:hsa05144	2.15e-06	0.00326	6	CCL2|CXCL8|IFNG|IL1B|TGFB1|TNF	49/43622 genes: 0,11%
Calmodulin induced events	REACT:R-HSA-111933	2.27e-06	0.00344	5	CALM1|CALM2|CREB1|PDE1B|PRKACA	28/43622 genes: 0,06%
CaM pathway	REACT:R-HSA-111997	2.27e-06	0.00344	5	CALM1|CALM2|CREB1|PDE1B|PRKACA	28/43622 genes: 0,06%
Signaling by TGF-beta Receptor Complex	REACT:R-HSA-170834	2.33e-06	0.00354	7	MYC|PRKCZ|SERPINE1|TGFB1|UBB|UBC|UCHL5	77/43622 genes: 0,18%
Peptide ligand-binding receptors	REACT:R-HSA-375276	2.35e-06	0.00356	10	CCL19|CCL21|CXCL10|CXCL8|HCRTR1|KISS1|NPS|PDYN|PNOC|PSAP	188/43622 genes: 0,43%
Caspase-mediated cleavage of cytoskeletal proteins	REACT:R-HSA-264870	2.37e-06	0.00359	4	CASP3|CASP7|CASP8|MAPT	13/43622 genes: 0,03%
Downregulation of ERBB2:ERBB3 signaling	REACT:R-HSA-1358803	2.37e-06	0.00359	4	AKT1|NRG1|UBB|UBC	13/43622 genes: 0,03%
TNFR1-induced proapoptotic signaling	REACT:R-HSA-5357786	2.37e-06	0.00359	4	CASP8|RIPK1|TNF|TNFAIP3	13/43622 genes: 0,03%
TP53 Regulates Transcription of Genes Involved in G1 Cell Cycle Arrest	REACT:R-HSA-6804116	2.37e-06	0.00359	4	CDK2|CDKN1A|E2F1|TP53	13/43622 genes: 0,03%
Uptake and function of anthrax toxins	REACT:R-HSA-5210891	2.37e-06	0.00359	4	CALM1|CALM2|MAP2K1|MAP2K6	13/43622 genes: 0,03%
Signaling by ERBB2	REACT:R-HSA-1227986	2.43e-06	0.00368	6	AKT1|GRB2|HSP90AA1|NRG1|UBB|UBC	50/43622 genes: 0,11%
RNA Polymerase I, RNA Polymerase III, and Mitochondrial Transcription	REACT:R-HSA-504046	2.66e-06	0.00404	9	BRF1|H2AC20|H2AC6|H2BC9|MAPK3|MBD3|NFIB|POLR1C|POLR2K	149/43622 genes: 0,34%
VEGFR2 mediated vascular permeability	REACT:R-HSA-5218920	2.72e-06	0.00414	5	AKT1|CALM1|CALM2|HSP90AA1|MTOR	29/43622 genes: 0,07%
Neurotransmitter Release Cycle	REACT:R-HSA-112310	2.73e-06	0.00415	6	ALDH5A1|CPLX1|HSPA8|SLC18A2|SLC22A2|SLC5A7	51/43622 genes: 0,12%
Organelle biogenesis and maintenance	REACT:R-HSA-1852241	2.99e-06	0.00454	13	CDK5RAP2|CEP290|CREB1|CYCS|DAP3|HDAC3|HDAC6|HSP90AA1|MEF2C|MRPL15|PRKACA|SIRT3|TUBA1A	340/43622 genes: 0,78%
Citrate cycle (TCA cycle)	KEGG:hsa00020	3.25e-06	0.00493	5	ACO2|DLST|IDH3A|PDHA1|SDHB	30/43622 genes: 0,07%
Downregulation of ERBB2 signaling	REACT:R-HSA-8863795	3.25e-06	0.00493	5	AKT1|HSP90AA1|NRG1|UBB|UBC	30/43622 genes: 0,07%
Pre-NOTCH Transcription and Translation	REACT:R-HSA-1912408	3.25e-06	0.00493	5	AGO3|CCND1|E2F1|JUN|TP53	30/43622 genes: 0,07%
Regulation of necroptotic cell death	REACT:R-HSA-5675482	3.29e-06	0.005	4	CASP8|FAS|FASLG|RIPK1	14/43622 genes: 0,03%
Ribosome	KEGG:hsa03010	3.31e-06	0.00503	9	MRPL15|RPL12|RPL19|RPL41|RPL8|RPL9|RPS12|RPS15|RPS27	153/43622 genes: 0,35%
SRP-dependent cotranslational protein targeting to membrane	REACT:R-HSA-1799339	3.37e-06	0.00512	8	RPL12|RPL19|RPL41|RPL8|RPL9|RPS12|RPS15|RPS27	115/43622 genes: 0,26%
Aldosterone synthesis and secretion	KEGG:hsa04925	3.57e-06	0.00542	7	CALM1|CALM2|CREB1|ITPR1|NR4A1|NR4A2|PRKACA	82/43622 genes: 0,19%
Chemical carcinogenesis	KEGG:hsa05204	3.57e-06	0.00542	7	CYP1A1|CYP1A2|CYP2E1|GSTA3|GSTA4|GSTP1|PTGS2	82/43622 genes: 0,19%
GTP hydrolysis and joining of the 60S ribosomal subunit	REACT:R-HSA-72706	3.83e-06	0.00582	8	RPL12|RPL19|RPL41|RPL8|RPL9|RPS12|RPS15|RPS27	117/43622 genes: 0,27%
L13a-mediated translational silencing of Ceruloplasmin expression	REACT:R-HSA-156827	3.83e-06	0.00582	8	RPL12|RPL19|RPL41|RPL8|RPL9|RPS12|RPS15|RPS27	117/43622 genes: 0,27%
Regulation of lipolysis in adipocytes	KEGG:hsa04923	3.84e-06	0.00583	6	ADORA1|AKT1|IRS2|PRKACA|PTGS2|TSHB	54/43622 genes: 0,12%
Antifolate resistance	KEGG:hsa01523	3.85e-06	0.00584	5	IL1B|MTHFR|NFKB1|RELA|TNF	31/43622 genes: 0,07%
Negative regulation of FGFR4 signaling	REACT:R-HSA-5654733	3.85e-06	0.00584	5	GRB2|MAPK1|MAPK3|UBB|UBC	31/43622 genes: 0,07%
Basal cell carcinoma	KEGG:hsa05217	4.29e-06	0.00651	6	BMP2|BMP4|GSK3B|TP53|WNT1|WNT5A	55/43622 genes: 0,13%
Activation of BAD and translocation to mitochondria	REACT:R-HSA-111447	4.47e-06	0.00678	4	AKT1|BAD|BCL2|BID	15/43622 genes: 0,03%
Toll-like receptor signaling	KEGG:hsa_M00686	4.47e-06	0.00678	4	NFKB1|NFKBIA|RELA|TRAF6	15/43622 genes: 0,03%
Activation of NOXA and translocation to mitochondria	REACT:R-HSA-111448	4.52e-06	0.00686	3	E2F1|PMAIP1|TP53	5/43622 genes: 0,01%
CaMK IV-mediated phosphorylation of CREB	REACT:R-HSA-111932	4.52e-06	0.00686	3	CALM1|CALM2|CREB1	5/43622 genes: 0,01%
Dopamine receptors	REACT:R-HSA-390651	4.52e-06	0.00686	3	DRD2|DRD4|DRD5	5/43622 genes: 0,01%
FasL/ CD95L signaling	REACT:R-HSA-75157	4.52e-06	0.00686	3	CASP8|FAS|FASLG	5/43622 genes: 0,01%
SMAC binds to IAPs	REACT:R-HSA-111463	4.52e-06	0.00686	3	CASP3|CASP7|CASP9	5/43622 genes: 0,01%
SMAC-mediated apoptotic response	REACT:R-HSA-111469	4.52e-06	0.00686	3	CASP3|CASP7|CASP9	5/43622 genes: 0,01%
SMAC-mediated dissociation of IAP:caspase complexes	REACT:R-HSA-111464	4.52e-06	0.00686	3	CASP3|CASP7|CASP9	5/43622 genes: 0,01%
Glycolysis	REACT:R-HSA-70171	4.53e-06	0.00688	5	ALDOC|ENO1|ENO2|HK1|TPI1	32/43622 genes: 0,07%
Ion homeostasis	REACT:R-HSA-5578775	4.77e-06	0.00724	6	CALM1|CALM2|FXYD6|ITPR1|PRKACA|SLC8A1	56/43622 genes: 0,13%
Vesicle-mediated transport	REACT:R-HSA-5653656	4.78e-06	0.00726	18	AKT1|ALB|ARF3|BICD1|CALM1|CALM2|CHRM2|COPE|DNM2|GRB2|HSP90AA1|HSPA8|KIF1B|STON2|UBB|UBC|VPS45|WNT5A	659/43622 genes: 1,51%
TCR signaling	REACT:R-HSA-202403	5.24e-06	0.00795	8	NFKB1|NFKBIA|PSMB1|PSMC4|RELA|TRAF6|UBB|UBC	122/43622 genes: 0,28%
Negative regulation of FGFR1 signaling	REACT:R-HSA-5654726	5.31e-06	0.00806	5	GRB2|MAPK1|MAPK3|UBB|UBC	33/43622 genes: 0,08%
ROS, RNS production in phagocytes	REACT:R-HSA-1222556	5.31e-06	0.00806	5	ATP6V0B|ATP6V0C|ATP6V1C1|NCF1|NOS2	33/43622 genes: 0,08%
Platelet activation	KEGG:hsa04611	5.56e-06	0.00845	8	ACTG1|AKT1|ITPR1|MAPK1|MAPK3|PRKACA|PRKCZ|ROCK1	123/43622 genes: 0,28%
Transcriptional regulation of white adipocyte differentiation	REACT:R-HSA-381340	5.73e-06	0.0087	7	CEBPD|HDAC3|NFKB1|RELA|TGFB1|TNF|WNT1	88/43622 genes: 0,20%
MAP3K8 (TPL2)-dependent MAPK1/3 activation	REACT:R-HSA-5684264	5.92e-06	0.00898	4	MAP2K1|NFKB1|UBB|UBC	16/43622 genes: 0,04%
Regulated Necrosis	REACT:R-HSA-5218859	5.92e-06	0.00898	4	CASP8|FAS|FASLG|RIPK1	16/43622 genes: 0,04%
RIPK1-mediated regulated necrosis	REACT:R-HSA-5213460	5.92e-06	0.00898	4	CASP8|FAS|FASLG|RIPK1	16/43622 genes: 0,04%
M Phase	REACT:R-HSA-68886	5.94e-06	0.00901	12	H2AC20|H2AC6|H2BC9|MAPK1|MAPK3|NIPBL|PSMB1|PSMC4|RB1|RPS27|UBB|UBC	308/43622 genes: 0,71%
Dilated cardiomyopathy	KEGG:hsa05414	6.18e-06	0.00938	7	ACTG1|IGF1|ITGB8|PRKACA|SLC8A1|TGFB1|TNF	89/43622 genes: 0,20%
African trypanosomiasis	KEGG:hsa05143	6.18e-06	0.00939	5	FAS|FASLG|IFNG|IL1B|TNF	34/43622 genes: 0,08%
Negative regulation of FGFR2 signaling	REACT:R-HSA-5654727	6.18e-06	0.00939	5	GRB2|MAPK1|MAPK3|UBB|UBC	34/43622 genes: 0,08%
Cap-dependent Translation Initiation	REACT:R-HSA-72737	6.27e-06	0.00952	8	RPL12|RPL19|RPL41|RPL8|RPL9|RPS12|RPS15|RPS27	125/43622 genes: 0,29%
Eukaryotic Translation Initiation	REACT:R-HSA-72613	6.27e-06	0.00952	8	RPL12|RPL19|RPL41|RPL8|RPL9|RPS12|RPS15|RPS27	125/43622 genes: 0,29%
Respiratory electron transport, ATP synthesis by chemiosmotic coupling, and heat production by uncoupling proteins.	REACT:R-HSA-163200	6.27e-06	0.00952	8	COX5A|COX6A1|COX6B1|COX7A2L|CYC1|CYCS|SDHB|UQCRC1	125/43622 genes: 0,29%

## Sheet: Vann Viewer - MnC2xMBxMZ
[ ETDC - CTD]	[MB - CGNs]	[MnCl2 - CTD]	[MnCl2 - CGNs]	[MB - CTD	[MB - CGNs] and [MnCl2 - CGNs]	[MB - CGNs] and [MnCl2 - CTD]	[MB - CTD] and [ ETDC - CTD] and [MB - CGNs] and [MnCl2 - CTD]	[MB - CTD] and [ ETDC - CTD] and [MB - CGNs] and [MnCl2 - CTD] and [MnCl2 - CGNs]	[MB - CTD] and [ ETDC - CTD]	[MB - CTD] and [ ETDC - CTD] and [MB - CGNs	[MB - CTD] and [ ETDC - CTD] and [MB - CGNs] and [MnCl2 - CGNs]	[MB - CTD] and [ ETDC - CTD] and [MnCl2 - CGNs]	[MB - CTD] and [ ETDC - CTD] and [MnCl2 - CTD] and [MnCl2 - CGNs]	[MnCl2 - CTD] and [MnCl2 - CGNs]	[MB - CTD] and [ ETDC - CTD] and [MnCl2 - CTD]
Respiratory electron transport	Ribosome biogenesis in eukaryotes	Hypertrophic cardiomyopathy (HCM)	Pyruvate metabolism	Respiratory electron transport	Thermogenesis	Scavenging by Class A Receptors	Epstein-Barr virus infection	Immune System	Cellular response to heat stress	Mitotic G1-G1/S phases	Metabolism of amino acids and derivatives	Beta-catenin independent WNT signaling	Signal Transduction	L1CAM interactions	Pathways in cancer
ATP synthesis by chemiosmotic coupling	Formation of the ternary complex and subsequently the 43S complex	Integrin cell surface interactions	Fructose and mannose metabolism	ATP synthesis by chemiosmotic coupling	Proteasome		Cell Cycle	Innate Immune System	Infectious disease	G2/M Transition	Oxidative phosphorylation	The citric acid (TCA) cycle and respiratory electron transport	Cytokine Signaling in Immune system		Apoptosis
and heat production by uncoupling proteins	Complex I biogenesis	BMAL1:CLOCK	Formation of the ternary complex and subsequently the 43S complex	and heat production by uncoupling proteins.	Metabolism of RNA		Neutrophil degranulation	Cellular responses to stress	Mitotic G2-G2/M phases	Cell Cycle Checkpoints	The role of GTSE1 in G2/M progression after G2 checkpoint	Synaptic vesicle cycle	Fc epsilon receptor (FCERI) signaling		Hepatitis B
	Antigen processing-Cross presentation	NPAS2 activates circadian gene expression	Hedgehog 'off' state	Regulation of PLK1 Activity at G2/M Transition	Ribosomal scanning and start codon recognition		Retrograde endocannabinoid signaling	Signaling by Interleukins	Deregulated CDK5 triggers multiple neurodegenerative pathways in Alzheimer's disease models		TCF dependent signaling in response to WNT	Glycolysis / Gluconeogenesis	Downstream signaling events of B Cell Receptor (BCR)		Disease
	Class I MHC mediated antigen processing & presentation	AMPK signaling pathway	Signaling by WNT	DNA Double-Strand Break Repair	Translation initiation complex formation			Metabolism	Neurodegenerative Diseases		UCH proteinases	Organelle biogenesis and maintenance	Adaptive Immune System		PI3K-Akt signaling pathway
	Cell Cycle Mitotic	Hematopoietic cell lineage	Transcriptional regulation by RUNX1		Major pathway of rRNA processing in the nucleolus and cytosol			Alzheimer's disease	Oocyte meiosis		Cardiac muscle contraction	Citrate cycle (TCA cycle)	Transmission across Chemical Synapses		Signalling by NGF
	N-glycan trimming in the ER and Calnexin/Calreticulin cycle	Inflammatory mediator regulation of TRP channels	Cellular responses to external stimuli		Ubiquitin-dependent degradation of Cyclin D1			Non-alcoholic fatty liver disease (NAFLD)	Activation of caspases through apoptosome-mediated cleavage		FCERI mediated NF-kB activation	M Phase	RAF/MAP kinase cascade		Fluid shear stress and atherosclerosis
	DNA Damage Recognition in GG-NER	Fatty acid	Intracellular signaling by second messengers		Regulation of RUNX2 expression and activity			Metabolism of proteins	Cytochrome c-mediated apoptotic response		GLI3 is processed to GLI3R by the proteasome		Carbon metabolism		Prostate cancer
	Regulation of Insulin-like Growth Factor (IGF) transport and uptake by Insulin-like Growth Factor Binding Proteins (IGFBPs)	triacylglycerol	Serotonin Neurotransmitter Release Cycle		Autodegradation of the E3 ubiquitin ligase COP1			Parkinson's disease	Glucose metabolism		SCF(Skp2)-mediated degradation of p27/p21		CLEC7A (Dectin-1) signaling		Platinum drug resistance
	Formation of TC-NER Pre-Incision Complex	and ketone body metabolism	Formation of ATP by chemiosmotic coupling		Ubiquitin Mediated Degradation of Phosphorylated Cdc25A			Huntington's disease	G1/S Transition		MAPK6/MAPK4 signaling		Platelet degranulation		NGF signalling via TRKA from the plasma membrane
	Intrinsic Pathway of Fibrin Clot Formation	Elastic fibre formation	Cristae formation		Regulation of ornithine decarboxylase (ODC)			Metabolic pathways	Cyclin E associated events during G1/S transition		Activation of NF-kappaB in B cells				MAPK signaling pathway
	Calnexin/calreticulin cycle	Regulation of lipid metabolism by Peroxisome proliferator-activated receptor alpha (PPARalpha)	Dopamine Neurotransmitter Release Cycle		Degradation of AXIN			Post-translational protein modification	HSF1-dependent transactivation		Downstream TCR signaling				Developmental Biology
	Post-translational protein phosphorylation	Adherens junction	Acetylcholine Neurotransmitter Release Cycle		Regulation of RUNX3 expression and activity			Ub-specific processing proteases	Apoptotic factor-mediated response		Orc1 removal from chromatin				Gene Expression
	HDL assembly	Circadian rhythm	Norepinephrine Neurotransmitter Release Cycle		SCF-beta-TrCP mediated degradation of Emi1			Interleukin-1 signaling	Cyclin D associated events in G1		Formation of a pool of free 40S subunits				Proteoglycans in cancer
	Cargo recognition for clathrin-mediated endocytosis	Molecules associated with elastic fibres	GABA synthesis release reuptake and degradation		FBXL7 down-regulates AURKA during mitotic entry and in early mitosis				G1 Phase		Ribosome				Transcriptional Regulation by TP53
	Common Pathway of Fibrin Clot Formation	Ferroptosis	Glutamate Neurotransmitter Release Cycle		AUF1 (hnRNP D0) binds and destabilizes mRNA				Constitutive Signaling by NOTCH1 HD+PEST Domain Mutants		L13a-mediated translational silencing of Ceruloplasmin expression				MicroRNAs in cancer
	Metalloprotease DUBs	Membrane Trafficking	Pyruvate metabolism and Citric Acid (TCA) cycle		Degradation of DVL				Constitutive Signaling by NOTCH1 PEST Domain Mutants						IL-17 signaling pathway
	Asparagine N-linked glycosylation	PPARA activates gene expression	Glyoxylate metabolism and glycine degradation		Degradation of GLI1 by the proteasome				Signaling by NOTCH1 HD+PEST Domain Mutants in Cancer						p53 signaling pathway
	Cyclin A/B1/B2 associated events during G2/M transition	Cell surface interactions at the vascular wall	Regulation of pyruvate dehydrogenase (PDH) complex		Dectin-1 mediated noncanonical NF-kB signaling				Signaling by NOTCH1 in Cancer						Diseases of signal transduction
	ER-Phagosome pathway	ECM-receptor interaction	Beta oxidation of myristoyl-CoA to lauroyl-CoA		NIK-->noncanonical NF-kB signaling				Signaling by NOTCH1 PEST Domain Mutants in Cancer						Downstream signal transduction
		ECM proteoglycans	Other interleukin signaling		CDT1 association with the CDC6:ORC:origin complex				Attenuation phase						Legionellosis
		Muscle contraction	Beta oxidation of palmitoyl-CoA to myristoyl-CoA		Autodegradation of Cdh1 by Cdh1:APC/C				Opioid Signalling						Tuberculosis
		Leukocyte transendothelial migration	Signaling by Nuclear Receptors		Asymmetric localization of PCP proteins				Serotonergic synapse						Signaling by PDGF
		Neuroactive ligand-receptor interaction	Hypusine synthesis from eIF5A-lysine		Regulation of mRNA stability by proteins that bind AU-rich elements				RHO GTPase Effectors						Endocrine resistance
		Ovarian steroidogenesis	Citric acid cycle (TCA cycle)		Hedgehog ligand biogenesis				p53-Dependent G1 DNA Damage Response						DAP12 signaling
		PERK regulates gene expression	Beta oxidation of lauroyl-CoA to decanoyl-CoA-CoA		Oxygen-dependent proline hydroxylation of Hypoxia-inducible Factor Alpha				p53-Dependent G1/S DNA damage checkpoint						Interleukin-4 and 13 signaling
		Cell death signalling via NRAGE	WNT ligand biogenesis and trafficking		Metabolism of polyamines				Renin secretion						Signaling by EGFR
		NRIF and NADE	Signaling by Retinoic Acid		APC/C:Cdc20 mediated degradation of Securin				G1/S DNA Damage Checkpoints						HIF-1 signaling pathway
		Unfolded Protein Response (UPR)	Acyl chain remodeling of CL		Regulation of RAS by GAPs				Long-term potentiation						DAP12 interactions
		Constitutive Signaling by Aberrant PI3K in Cancer	Beta oxidation of octanoyl-CoA to hexanoyl-CoA		RUNX1 regulates transcription of genes involved in differentiation of HSCs				Uptake and actions of bacterial toxins						Programmed Cell Death
		Interferon gamma signaling	Beta oxidation of hexanoyl-CoA to butanoyl-CoA		Cross-presentation of soluble exogenous antigens (endosomes)				Apoptotic machinery						Intrinsic Pathway for Apoptosis
		Interferon Signaling	Beta oxidation of decanoyl-CoA to octanoyl-CoA-CoA		Regulation of PTEN stability and activity				Regulation of HSF1-mediated heat shock response						Viral carcinogenesis
[truncated: 246 more rows]
