# Supplementary material for: Manganese-induced neurotoxicity in cerebellar granule neurons due to perturbation of cell network pathways with potential implications for neurodegenerative disorders
Source: Royal Society of Chemistry journal article supplement (doi:10.1039/d0mt00085j), 2020-07-21
Supplement: d0mt00085j2.xlsx [file d0mt00085j2.xlsx]

## Sheet: Results_MnCl2 (2)
Protein ID	Protein name	Gene name	Length (aa)	MnCl2 1 uM		MnCl2 3 uM
		Gene names	Length	Ratio	P.value	Ratio	Pvalue
A0A087WPL5	ATP-dependent RNA helicase A	Dhx9	1383			1.24522	0.0241213
A1L0U3	Histone H3 (Fragment)	Hist1h3e	133	1.13968	0.0136435	1.43123	2.74365e-07
A2ALV1	Endophilin-A1	Sh3gl2	182	0.711364	0.028827
B2RTP7	Krt2 protein	Krt2	707	1.39486	0.00927664
B7ZNF6	Ctnnd2 protein	Ctnnd2	1221	1.22554	0.0325092	1.30987	0.00787015
D3YVJ7	Aldose reductase (Fragment)	Akr1b3	176	1.46089	0.00145774
D3YYD5	Vacuolar protein sorting-associated protein 29 (Vesicle protein sorting 29) (Fragment)	Vps29	124	0.89428	0.0497085	0.774597	0.00213254
E0CZ27	Histone H3 (Fragment)	H3f3a	119	1.15424	0.000259591	1.22479	1.43092e-05
E9PYF1	Aminopeptidase B	Rnpep	611	0.725741	0.00607776
E9Q7H5	Uncharacterized protein	Gm8991	300			1.33437	0.00261228
E9QB01	Neural cell adhesion molecule 1	Ncam1	849			1.21305	0.00329213
F8WIX8	Histone H2A	Hist1h2al	125			1.22489	0.00933259
J3QPS8	Eukaryotic translation initiation factor 5A-1	Eif5a	76	0.51255	0.000160292	1.40666	0.00234902
O08553	Dihydropyrimidinase-related protein 2 (DRP-2) (Unc-33-like phosphoprotein 2) (ULIP-2)	Dpysl2 Crmp2 Ulip2	572	1.27855	0.0122252
O08585	Clathrin light chain A (Lca)	Clta	235			0.917123	0.0138491
O08749	Dihydrolipoyl dehydrogenase, mitochondrial (EC 1.8.1.4) (Dihydrolipoamide dehydrogenase)	Dld	509	1.18895	0.0400353	1.26131	0.00769662
O35658	Complement component 1 Q subcomponent-binding protein, mitochondrial (GC1q-R protein) (Glycoprotein gC1qBP) (C1qBP)	C1qbp Gc1qbp	278	1.1977	0.0457729	1.30989	0.00437452
P02301	Histone H3.3C (Embryonic)	H3f3c Gm14384	136	1.38193	0.00159005
P05064	Fructose-bisphosphate aldolase A (EC 4.1.2.13) (Aldolase 1) (Muscle-type aldolase)	Aldoa Aldo1	364			1.22337	0.0123924
P07724	Serum albumin	Alb Alb-1 Alb1	608	0.77706	0.0006524	0.554829	1.47694e-08
P08249	Malate dehydrogenase, mitochondrial (EC 1.1.1.37)	Mdh2 Mor1	338	1.22155	0.00263868	1.29637	0.000232079
P12787	Cytochrome c oxidase subunit 5A, mitochondrial (Cytochrome c oxidase polypeptide Va)	Cox5a	146			1.20633	0.0213255
P20065-2	Thymosin beta-4 (T beta 4) [Cleaved into: Hematopoietic system regulatory peptide (Seraspenide)]	Tmsb4x Ptmb4 Tmsb4	50			0.741511	0.0112367
P28184	Metallothionein-3 (MT-3) (Growth inhibitory factor) (GIF) (Metallothionein-III) (MT-III)	Mt3	68			0.718472	0.0112382
P31786	Acyl-CoA-binding protein (ACBP) (Diazepam-binding inhibitor) (DBI) (Endozepine) (EP)	Dbi	87			0.706399	0.00206838
P48428	Tubulin-specific chaperone A (TCP1-chaperonin cofactor A) (Tubulin-folding cofactor A) (CFA)	Tbca	108	0.833177	0.00633728	0.694184	1.61129e-05
P48678-3	Prelamin-A/C [Cleaved into: Lamin-A/C]	Lmna Lmn1	665			1.27051	0.0146512
P50114	Protein S100-B (S-100 protein beta chain) (S-100 protein subunit beta) (S100 calcium-binding protein B)	S100b	92			0.760174	0.0262345
P54227	Stathmin (Leukemia-associated gene protein) (Leukemia-associated phosphoprotein p18) (Metablastin) (Oncoprotein 18) (Op18) (Phosphoprotein p19) (pp19) (Prosolin) (Protein Pr22) (pp17)	Stmn1 Lag Lap18 Pr22	149	1.49513	1.46785e-07	1.24108	0.000477488
P62204	Calmodulin (CaM)	Calm1 Calm Cam Cam1; Calm2 Cam2 Camb; Calm3 Cam3 Camc	149	0.781555	0.0281638
P68373	Tubulin alpha-1C chain (Alpha-tubulin 6) (Alpha-tubulin isotype M-alpha-6) (Tubulin alpha-6 chain)	Tuba1c Tuba6	449			1.22257	0.0262364
Q04447	Creatine kinase B-type (EC 2.7.3.2) (B-CK) (Creatine kinase B chain)	Ckb Ckbb	381			0.762559	0.03219
Q06185	ATP synthase subunit e, mitochondrial (ATPase subunit e)	Atp5i Atp5k Lfm-1 Lfm1	71	1.15276	0.000635652	1.2944	3.47333e-05
Q0VDP2	Slc2a13 protein	Slc2a13	504			1.81608	0.0363624
Q148V7-3	LisH domain and HEAT repeat-containing protein KIAA1468	Kiaa1468	1216			1.24332	0.0347889
Q3TDD8	Putative uncharacterized protein	Eif4b	609			1.23596	0.00775574
Q3TSX8	Putative uncharacterized protein	Tomm70a	611	1.25964	0.0103279
Q3U0V1	Far upstream element-binding protein 2 (FUSE-binding protein 2) (KH type-splicing regulatory protein) (KSRP)	Khsrp Fubp2	748	1.20251	0.00026777	1.16861	0.00135401
Q3UDY7	Putative uncharacterized protein (Fragment)	Dpp3	583			3.9276	0.0237888
Q3UGT5	Alpha-1,4 glucan phosphorylase (EC 2.4.1.1)	Pygb	843	1.2016	0.0259009
Q3UXS6	Putative uncharacterized protein	Rps15	124			1.50947	0.0389795
Q3V1L4	Cytosolic purine 5'-nucleotidase (EC 3.1.3.5) (Cytosolic 5'-nucleotidase II)	Nt5c2	560			0.773531	0.035912
Q569Z0	Ribosomal protein L14	Rpl14-ps1 Rpl14	216	1.351	0.0157969
Q5D0A4	Stx1a protein (Fragment)	Stx1a	287	1.09845	0.0402163	1.22467	0.000113939
Q61699	Heat shock protein 105 kDa (42 degrees C-HSP) (Heat shock 110 kDa protein) (Heat shock-related 100 kDa protein E7I) (HSP-E7I)	Hsph1 Hsp105 Hsp110 Kiaa0201	858	0.870281	0.0126193	0.77941	0.000149948
Q62261	Spectrin beta chain, non-erythrocytic 1 (Beta-II spectrin) (Embryonic liver fodrin) (Fodrin beta chain)	Sptbn1 Elf Spnb-2 Spnb2 Sptb2	2363	1.21236	0.00275162	1.20374	0.00369471
Q62425	Cytochrome c oxidase subunit NDUFA4	Ndufa4	82	1.15408	0.00037514	1.21376	1.72308e-05
Q68FD6	Tln2 protein	Tln2	1775			1.22015	0.00170178
Q80U51	MKIAA0275 protein (Fragment)	Spock2 mKIAA0275	380			1.2504	0.00109023
Q8BGB7-2	Enolase-phosphatase E1 (EC 3.1.3.77) (2,3-diketo-5-methylthio-1-phosphopentane phosphatase) (MASA homolog)	Enoph1 Masa	257	0.831919	0.00119486	0.777501	0.000285984
Q8BMS1	Trifunctional enzyme subunit alpha, mitochondrial (TP-alpha) [Includes: Long-chain enoyl-CoA hydratase (EC 4.2.1.17); Long chain 3-hydroxyacyl-CoA dehydrogenase (EC 1.1.1.211)]	Hadha	763	0.778898	0.00257125	0.877802	0.0323618
Q8C1Z9	Putative uncharacterized protein		159	1.20146	0.0372502	1.20146	0.037243
Q8C553	Putative uncharacterized protein (Fragment)	Lmnb1	413			1.20595	0.000712393
Q8CE19	Putative uncharacterized protein	Syn2	313	1.41068	7.16652e-05	1.41018	7.23691e-05
Q91X76	5'-nucleotidase domain containing 2 (Protein Nt5dc2)	Nt5dc2	390			1.23773	0.0185853
Q921Z9	Mannose-6-phosphate isomerase (EC 5.3.1.8)	Mpi	423	0.764076	0.0328923	0.783489	0.0450943
Q922R8	Protein disulfide-isomerase A6 (EC 5.3.4.1) (Thioredoxin domain-containing protein 7)	Pdia6 Txndc7	440	0.652266	0.0418381
Q9R1P1	Proteasome subunit beta type-3 (EC 3.4.25.1) (Proteasome chain 13) (Proteasome component C10-II) (Proteasome theta chain)	Psmb3	205			0.715207	0.000951963
Q9WV02-2	RNA-binding motif protein, X chromosome (Heterogeneous nuclear ribonucleoprotein G) (hnRNP G) [Cleaved into: RNA-binding motif protein, X chromosome, N-terminally processed]	Rbmx Hnrnpg Hnrpg Rbmxp1 Rbmxrt	391	1.17047	0.00383032	1.26405	0.000125864
206

## Sheet: Results_MnCl2
Protein ID	Protein name	Gene name	Length (aa)	MnCl2 1 uM		MnCl2 3 uM
		Gene names	Length	Ratio	P.value	Ratio	Pvalue
A0A087WPL5	ATP-dependent RNA helicase A	Dhx9	1383			1.24522	0.0241213
A0AUV1	Histone H2A (Fragment)	Hist1h2ah	127	1.13434	0.0273867
A0JLV3	Histone H2B (Fragment)	Hist1h2bj	123			1.15412	0.0376938
A1L0U3	Histone H3 (Fragment)	Hist1h3e	133	1.13968	0.0136435	1.43123	2.74365e-07
A2A839	Protein 4.1	Epb4.1	639			1.16169	0.00291982
A2AFI9	Histone-binding protein RBBP7	Rbbp7	386			0.855669	0.0492102
A2ALV1	Endophilin-A1	Sh3gl2	182	0.711364	0.028827
B1AXY1	DnaJ homolog subfamily A member 1 (Fragment)	Dnaja1	278			1.11196	0.0348963
B2RTP7	Krt2 protein	Krt2	707	1.39486	0.00927664
B7ZNF6	Ctnnd2 protein	Ctnnd2	1221	1.22554	0.0325092	1.30987	0.00787015
D3YVJ7	Aldose reductase (Fragment)	Akr1b3	176	1.46089	0.00145774
D3YWU6	Quinone oxidoreductase (Fragment)	Cryz	98			1.15637	0.0393094
D3YYD5	Vacuolar protein sorting-associated protein 29 (Vesicle protein sorting 29) (Fragment)	Vps29	124	0.89428	0.0497085	0.774597	0.00213254
D3YYE1	Acidic leucine-rich nuclear phosphoprotein 32 family member A (Fragment)	Anp32a	198			0.895716	0.0204392
D3Z0F5	COP9 signalosome complex subunit 6	Cops6	297			0.811751	0.0413529
D3Z2H9	Uncharacterized protein	Tpm3-rs7	248			0.884226	0.0326112
D3Z4A4	Peroxiredoxin-2 (Fragment)	Prdx2	147			0.851661	0.00363998
D3Z6I8	Tropomyosin alpha-3 chain	Tpm3	247			0.906314	0.0341114
D3Z712	40S ribosomal protein S15a (Fragment)	Rps15a	69			1.09319	0.0201072
D3Z7M9	Acidic leucine-rich nuclear phosphoprotein 32 family member A	Anp32a	233			0.876315	0.0421266
E0CZ27	Histone H3 (Fragment)	H3f3a	119	1.15424	0.000259591	1.22479	1.43092e-05
E9PYF1	Aminopeptidase B	Rnpep	611	0.725741	0.00607776
E9Q4Q2	Splicing factor 1	Sf1	548			1.10241	0.0393162
E9Q7H5	Uncharacterized protein	Gm8991	300			1.33437	0.00261228
E9QB01	Neural cell adhesion molecule 1	Ncam1	849			1.21305	0.00329213
F6RPJ9	Insulin-degrading enzyme (Fragment)	Ide	987			0.880018	0.0293205
F8WIX8	Histone H2A	Hist1h2al	125			1.22489	0.00933259
G3UVV4	Hexokinase (EC 2.7.1.1)	Hk1 mCG_127656	917	1.13944	0.0308065
G5E839	T-complex protein 1 subunit delta	Cct4	509	0.868935	0.00672078	0.903207	0.0398619
H3BJP2	S-formylglutathione hydrolase (Fragment)	Esd	247	0.807036	0.019535
J3QPS8	Eukaryotic translation initiation factor 5A-1	Eif5a	76	0.51255	0.000160292	1.40666	0.00234902
K3W4Q8	Basigin (Basigin, isoform CRA_d)	Bsg mCG_13385	218			1.14753	0.0154306
O08553	Dihydropyrimidinase-related protein 2 (DRP-2) (Unc-33-like phosphoprotein 2) (ULIP-2)	Dpysl2 Crmp2 Ulip2	572	1.27855	0.0122252
O08585	Clathrin light chain A (Lca)	Clta	235			0.917123	0.0138491
O08749	Dihydrolipoyl dehydrogenase, mitochondrial (EC 1.8.1.4) (Dihydrolipoamide dehydrogenase)	Dld	509	1.18895	0.0400353	1.26131	0.00769662
O35658	Complement component 1 Q subcomponent-binding protein, mitochondrial (GC1q-R protein) (Glycoprotein gC1qBP) (C1qBP)	C1qbp Gc1qbp	278	1.1977	0.0457729	1.30989	0.00437452
O35685	Nuclear migration protein nudC (Nuclear distribution protein C homolog) (Silica-induced gene 92 protein) (SIG-92)	Nudc	332			1.1292	0.0185605
O55042-2	Alpha-synuclein (Non-A beta component of AD amyloid) (Non-A4 component of amyloid precursor) (NACP)	Snca Syn	140			0.906172	0.0461082
P02301	Histone H3.3C (Embryonic)	H3f3c Gm14384	136	1.38193	0.00159005
P03995-2	Glial fibrillary acidic protein (GFAP)	Gfap	430	1.10553	0.0062712	1.09328	0.0134298
P05064	Fructose-bisphosphate aldolase A (EC 4.1.2.13) (Aldolase 1) (Muscle-type aldolase)	Aldoa Aldo1	364			1.22337	0.0123924
P06837	Neuromodulin (Axonal membrane protein GAP-43) (Calmodulin-binding protein P-57) (Growth-associated protein 43)	Gap43 Basp2	227	1.09327	0.0201531
P07356	Annexin A2 (Annexin II) (Annexin-2) (Calpactin I heavy chain) (Calpactin-1 heavy chain) (Chromobindin-8) (Lipocortin II) (Placental anticoagulant protein IV) (PAP-IV) (Protein I) (p36)	Anxa2 Anx2 Cal1h	339	1.07628	0.0398053
P07724	Serum albumin	Alb Alb-1 Alb1	608	0.77706	0.0006524	0.554829	1.47694e-08
P08030	Adenine phosphoribosyltransferase (APRT) (EC 2.4.2.7)	Aprt	180	0.863986	0.0373553
P08228	Superoxide dismutase [Cu-Zn] (EC 1.15.1.1)	Sod1	154			0.848437	0.0315594
P08249	Malate dehydrogenase, mitochondrial (EC 1.1.1.37)	Mdh2 Mor1	338	1.22155	0.00263868	1.29637	0.000232079
P08551	Neurofilament light polypeptide (NF-L) (68 kDa neurofilament protein) (Neurofilament triplet L protein)	Nefl Nf68 Nfl	543			1.08827	0.0183814
P09405	Nucleolin (Protein C23)	Ncl Nuc	707			0.87543	0.0452998
P10637-4	Microtubule-associated protein tau (Neurofibrillary tangle protein) (Paired helical filament-tau) (PHF-tau)	Mapt Mtapt Tau	733			1.11708	0.0393373
P10649	Glutathione S-transferase Mu 1 (EC 2.5.1.18) (GST 1-1) (GST class-mu 1) (Glutathione S-transferase GT8.7) (pmGT10)	Gstm1	218	0.889725	0.0156544	0.857252	0.00241895
P10852	4F2 cell-surface antigen heavy chain (4F2hc) (Solute carrier family 3 member 2) (CD antigen CD98)	Slc3a2 Mdu1	526	1.12014	0.044655	1.1473	0.0171298
P12658	Calbindin (Calbindin D28) (D-28K) (PCD-29) (Spot 35 protein) (Vitamin D-dependent calcium-binding protein, avian-type)	Calb1	261			0.924926	0.0176682
P12787	Cytochrome c oxidase subunit 5A, mitochondrial (Cytochrome c oxidase polypeptide Va)	Cox5a	146			1.20633	0.0213255
P12960	Contactin-1 (Neural cell surface protein F3)	Cntn1	1020	1.13482	0.0288137
P14733	Lamin-B1	Lmnb1	588			1.14565	0.00947669
P15864	Histone H1.2 (H1 VAR.1) (H1c)	Hist1h1c H1f2	212			1.17179	0.0403733
P16546-2	Spectrin alpha chain, non-erythrocytic 1 (Alpha-II spectrin) (Fodrin alpha chain)	Sptan1 Spna2 Spta2	2472	1.13527	0.000109186	1.13977	7.7021e-05
P18760	Cofilin-1 (Cofilin, non-muscle isoform)	Cfl1	166			0.842806	0.0190706
P19536	Cytochrome c oxidase subunit 5B, mitochondrial (Cytochrome c oxidase polypeptide Vb)	Cox5b	128			1.10572	0.027362
P19783	Cytochrome c oxidase subunit 4 isoform 1, mitochondrial (Cytochrome c oxidase polypeptide IV) (Cytochrome c oxidase subunit IV isoform 1) (COX IV-1)	Cox4i1 Cox4 Cox4a	169			1.13457	0.0244769
P20029	78 kDa glucose-regulated protein (GRP-78) (Heat shock 70 kDa protein 5) (Immunoglobulin heavy chain-binding protein) (BiP)	Hspa5 Grp78	655	1.11364	0.0385543
P20065-2	Thymosin beta-4 (T beta 4) [Cleaved into: Hematopoietic system regulatory peptide (Seraspenide)]	Tmsb4x Ptmb4 Tmsb4	50			0.741511	0.0112367
P20152	Vimentin	Vim	466	1.18041	0.0128021
P21107-2	Tropomyosin alpha-3 chain (Gamma-tropomyosin) (Tropomyosin-3)	Tpm3 Tpm-5 Tpm5	285	0.885432	8.89949e-05	0.835726	6.06469e-07
P27048	Small nuclear ribonucleoprotein-associated protein B (snRNP-B) (snRPB) (Sm protein B) (Sm-B) (SmB)	Snrpb	231	1.1575	6.62295e-05	1.1363	0.000292637
P28184	Metallothionein-3 (MT-3) (Growth inhibitory factor) (GIF) (Metallothionein-III) (MT-III)	Mt3	68			0.718472	0.0112382
P29341	Polyadenylate-binding protein 1 (PABP-1) (Poly(A)-binding protein 1)	Pabpc1 Pabp1	636			1.16091	0.0275495
P29595	NEDD8 (Neddylin) (Neural precursor cell expressed developmentally down-regulated protein 8) (NEDD-8) (Ubiquitin-like protein Nedd8)	Nedd8 Nedd-8	81	1.1235	0.0204325
P31786	Acyl-CoA-binding protein (ACBP) (Diazepam-binding inhibitor) (DBI) (Endozepine) (EP)	Dbi	87			0.706399	0.00206838
P32261	Antithrombin-III (ATIII) (Serpin C1)	Serpinc1 At3	465			1.07375	0.048154
P35279	Ras-related protein Rab-6A (Rab-6)	Rab6a Rab6 MNCb-1660	208			0.848058	0.0161203
P40124	Adenylyl cyclase-associated protein 1 (CAP 1)	Cap1 Cap	474			1.1009	0.0423313
P42932	T-complex protein 1 subunit theta (TCP-1-theta) (CCT-theta)	Cct8 Cctq	548	0.937196	0.0149052	0.885494	7.38944e-05
P43275	Histone H1.1 (H1 VAR.3) (Histone H1a) (H1a)	Hist1h1a H1a H1f1	213			1.16441	0.00122877
P47963	60S ribosomal protein L13 (A52)	Rpl13	211	0.931072	0.0317691	1.08051	0.0196327
P48428	Tubulin-specific chaperone A (TCP1-chaperonin cofactor A) (Tubulin-folding cofactor A) (CFA)	Tbca	108	0.833177	0.00633728	0.694184	1.61129e-05
P48678-3	Prelamin-A/C [Cleaved into: Lamin-A/C]	Lmna Lmn1	665			1.27051	0.0146512
P48962	ADP/ATP translocase 1 (ADP,ATP carrier protein 1) (ADP,ATP carrier protein, heart/skeletal muscle isoform T1) (Adenine nucleotide translocator 1) (ANT 1) (Solute carrier family 25 member 4) (mANC1)	Slc25a4 Anc1 Ant1	298	1.10482	0.0395009
P50114	Protein S100-B (S-100 protein beta chain) (S-100 protein subunit beta) (S100 calcium-binding protein B)	S100b	92			0.760174	0.0262345
P50247	Adenosylhomocysteinase (AdoHcyase) (EC 3.3.1.1) (CUBP) (Liver copper-binding protein) (S-adenosyl-L-homocysteine hydrolase)	Ahcy	432	0.882115	0.0419889	0.865011	0.0208861
P52480	Pyruvate kinase PKM (EC 2.7.1.40) (Pyruvate kinase muscle isozyme)	Pkm Pk3 Pkm2 Pykm	531			1.1919	0.0486733
P52480-2				1.18611	0.00194655	1.18435	0.00209581
P53996-2	Cellular nucleic acid-binding protein (CNBP) (Zinc finger protein 9)	Cnbp Cnbp1 Znf9	178			1.10578	0.0305125
P54227	Stathmin (Leukemia-associated gene protein) (Leukemia-associated phosphoprotein p18) (Metablastin) (Oncoprotein 18) (Op18) (Phosphoprotein p19) (pp19) (Prosolin) (Protein Pr22) (pp17)	Stmn1 Lag Lap18 Pr22	149	1.49513	1.46785e-07	1.24108	0.000477488
P56480	ATP synthase subunit beta, mitochondrial (EC 3.6.3.14)	Atp5b	529			0.856288	0.0435781
P60335	Poly(rC)-binding protein 1 (Alpha-CP1) (Heterogeneous nuclear ribonucleoprotein E1) (hnRNP E1)	Pcbp1	356	1.16087	0.0448352
P60710	Actin, cytoplasmic 1 (Beta-actin) [Cleaved into: Actin, cytoplasmic 1, N-terminally processed]	Actb	375			0.875844	0.0484538
P60879-2	Synaptosomal-associated protein 25 (SNAP-25) (Super protein) (SUP) (Synaptosomal-associated 25 kDa protein)	Snap25 Snap	206	1.07567	0.0336369
P61358	60S ribosomal protein L27	Rpl27	136			1.10396	0.0215891
P61971	Nuclear transport factor 2 (NTF-2)	Nutf2 Ntf2	127	0.893994	0.0167808	0.902799	0.0271932
P61979	Heterogeneous nuclear ribonucleoprotein K (hnRNP K)	Hnrnpk Hnrpk	463	1.16941	0.0437592
P61982	14-3-3 protein gamma [Cleaved into: 14-3-3 protein gamma, N-terminally processed]	Ywhag	247	1.10165	0.0329912
P62204	Calmodulin (CaM)	Calm1 Calm Cam Cam1; Calm2 Cam2 Camb; Calm3 Cam3 Camc	149	0.781555	0.0281638
P62320	Small nuclear ribonucleoprotein Sm D3 (Sm-D3) (snRNP core protein D3)	Snrpd3	126	1.16218	0.00550494	1.18275	0.00276923
P62806	Histone H4	Hist1h4a; Hist1h4b H4-53; Hist1h4c H4-12; Hist1h4d; Hist1h4f; Hist1h4h; Hist1h4i; Hist1h4j; Hist1h4k; Hist1h4m; Hist2h4a Hist2h4; Hist4h4	103	1.15916	0.00351391
P63001	Ras-related C3 botulinum toxin substrate 1 (p21-Rac1)	Rac1	192	0.871774	0.0118805
P63005-2	Platelet-activating factor acetylhydrolase IB subunit alpha (Lissencephaly-1 protein) (LIS-1) (PAF acetylhydrolase 45 kDa subunit) (PAF-AH 45 kDa subunit) (PAF-AH alpha) (PAFAH alpha)	Pafah1b1 Lis-1 Lis1 Pafaha	410			1.1411	0.000594756
P63101	14-3-3 protein zeta/delta (Protein kinase C inhibitor protein 1) (KCIP-1) (SEZ-2)	Ywhaz	245	0.847375	0.00816223	0.802165	0.000912472
P67778	Prohibitin (B-cell receptor-associated protein 32) (BAP 32)	Phb	272			1.18674	0.000984885
P68254-2	14-3-3 protein theta (14-3-3 protein tau)	Ywhaq	245	0.899019	0.0193599	0.859426	0.00177091
P68373	Tubulin alpha-1C chain (Alpha-tubulin 6) (Alpha-tubulin isotype M-alpha-6) (Tubulin alpha-6 chain)	Tuba1c Tuba6	449			1.22257	0.0262364
P68510	14-3-3 protein eta	Ywhah	246			0.879551	0.00820354
P84084	ADP-ribosylation factor 5	Arf5	180			0.856504	0.00442754
P84089	Enhancer of rudimentary homolog (Mer)	Erh	104	0.910563	0.0495982
Q02053	Ubiquitin-like modifier-activating enzyme 1 (Ubiquitin-activating enzyme E1) (Ubiquitin-activating enzyme E1 X) (Ubiquitin-like modifier-activating enzyme 1 X)	Uba1 Sbx Ube1 Ube1ax Ube1x	1058	0.911227	0.0329891	0.908039	0.0276075
Q04447	Creatine kinase B-type (EC 2.7.3.2) (B-CK) (Creatine kinase B chain)	Ckb Ckbb	381			0.762559	0.03219
Q05CD2	Psip1 protein (Fragment)	Psip1	260			1.11116	0.0369099
Q05CK2	Rpl18a protein	Rpl18a	151	0.94124	0.013763
Q06185	ATP synthase subunit e, mitochondrial (ATPase subunit e)	Atp5i Atp5k Lfm-1 Lfm1	71	1.15276	0.000635652	1.2944	3.47333e-05
Q0VDP2	Slc2a13 protein	Slc2a13	504			1.81608	0.0363624
Q0VGB7	Serine/threonine-protein phosphatase 4 regulatory subunit 2	Ppp4r2	417			0.819307	0.00802417
Q148V7-3	LisH domain and HEAT repeat-containing protein KIAA1468	Kiaa1468	1216			1.24332	0.0347889
Q3T992	Putative uncharacterized protein	Ubqln1	554			0.810559	0.00620587
Q3T9V8	Putative uncharacterized protein	Dctn1	1239			1.17531	0.00404083
Q3TDD8	Putative uncharacterized protein	Eif4b	609			1.23596	0.00775574
Q3TF25	Putative uncharacterized protein	Atp5o	213			1.13167	0.016336
Q3THQ5	Putative uncharacterized protein	Stip1	543			0.879453	0.0419312
Q3TL58	Putative uncharacterized protein	Skp1a	163			0.906072	0.0488068
Q3TLL6	Putative uncharacterized protein	Eif4a1	364			1.17495	0.00855242
Q3TSS0	S-adenosylmethionine synthase (EC 2.5.1.6)	Mat2a	362			0.850962	0.0253473
Q3TSX8	Putative uncharacterized protein	Tomm70a	611	1.25964	0.0103279
Q3TW28	Putative uncharacterized protein	Tpp2	1249	0.909067	0.0462186	0.863003	0.00384444
Q3U0V1	Far upstream element-binding protein 2 (FUSE-binding protein 2) (KH type-splicing regulatory protein) (KSRP)	Khsrp Fubp2	748	1.20251	0.00026777	1.16861	0.00135401
Q3U144	Putative uncharacterized protein (Fragment)	Slc3a2	400			1.1335	0.00132269
Q3U281	Putative uncharacterized protein	Sar1b Sara2	198	0.816152	0.0119313
Q3U449	Bisphosphate 3'-nucleotidase 1, isoform CRA_a	Bpnt1 mCG_12384	308			0.876667	0.000590697
Q3U4W8	Ubiquitin carboxyl-terminal hydrolase (EC 3.4.19.12)	Usp5	835			0.845972	0.000531048
Q3U617	Putative uncharacterized protein	Psmd8	183	0.866549	0.0312296	0.859812	0.0247911
Q3U9V1	Putative uncharacterized protein	St13	371	1.10297	0.00267731	1.11759	0.00090808
Q3UCF0	Proteasome subunit alpha type (EC 3.4.25.1)	Psma4	261			1.10931	0.0346709
Q3UD67	Alanine--tRNA ligase, cytoplasmic (EC 6.1.1.7) (Alanyl-tRNA synthetase)	Aars	968	0.92064	0.0460613
Q3UDR2	Protein disulfide-isomerase (EC 5.3.4.1) (Fragment)	P4hb	505			0.931556	0.0302926
Q3UDY7	Putative uncharacterized protein (Fragment)	Dpp3	583			3.9276	0.0237888
Q3UGT5	Alpha-1,4 glucan phosphorylase (EC 2.4.1.1)	Pygb	843	1.2016	0.0259009
Q3UL78	Putative uncharacterized protein	Cdc42	147			0.88805	0.000347545
Q3USC7	Ganglioside-induced differentiation-associated protein 1-like 1	Gdap1l1	367			1.16877	0.0127462
Q3UUX9	Putative uncharacterized protein	Gdi2	445			0.839808	0.00365661
Q3UXS6	Putative uncharacterized protein	Rps15	124			1.50947	0.0389795
Q3V1L4	Cytosolic purine 5'-nucleotidase (EC 3.1.3.5) (Cytosolic 5'-nucleotidase II)	Nt5c2	560			0.773531	0.035912
Q569Z0	Ribosomal protein L14	Rpl14-ps1 Rpl14	216	1.351	0.0157969
Q5D0A4	Stx1a protein (Fragment)	Stx1a	287	1.09845	0.0402163	1.22467	0.000113939
Q5SX49	Profilin	Pfn1	112			0.843198	0.0133596
Q5U4C2	Dipeptidyl aminopeptidase-like protein 6 (Dpp6 protein)	Dpp6	801	1.13593	0.0130754
Q61553	Fascin (Singed-like protein)	Fscn1 Fan1 Snl	493	1.18065	0.0336919
Q61699	Heat shock protein 105 kDa (42 degrees C-HSP) (Heat shock 110 kDa protein) (Heat shock-related 100 kDa protein E7I) (HSP-E7I)	Hsph1 Hsp105 Hsp110 Kiaa0201	858	0.870281	0.0126193	0.77941	0.000149948
Q62261	Spectrin beta chain, non-erythrocytic 1 (Beta-II spectrin) (Embryonic liver fodrin) (Fodrin beta chain)	Sptbn1 Elf Spnb-2 Spnb2 Sptb2	2363	1.21236	0.00275162	1.20374	0.00369471
Q62425	Cytochrome c oxidase subunit NDUFA4	Ndufa4	82	1.15408	0.00037514	1.21376	1.72308e-05
Q64433	10 kDa heat shock protein, mitochondrial (Hsp10) (10 kDa chaperonin) (Chaperonin 10) (CPN10)	Hspe1	102	0.945698	0.0430325
Q64674	Spermidine synthase (SPDSY) (EC 2.5.1.16) (Putrescine aminopropyltransferase)	Srm	302			0.917739	0.0390403
Q68FD6	Tln2 protein	Tln2	1775			1.22015	0.00170178
Q6P069-2	Sorcin	Sri	198			0.890792	0.0129665
Q6P2K2	Acyl-CoA thioesterase 2	Acot2 Mte1	453			1.09705	0.0164529
Q6P9L9	Eef2 protein (Fragment)	Eef2	843			1.08188	0.040079
Q80U51	MKIAA0275 protein (Fragment)	Spock2 mKIAA0275	380			1.2504	0.00109023
Q80UU6	Opioid growth factor receptor	Ogfr	633			0.872581	0.00392317
Q8BGB7-2	Enolase-phosphatase E1 (EC 3.1.3.77) (2,3-diketo-5-methylthio-1-phosphopentane phosphatase) (MASA homolog)	Enoph1 Masa	257	0.831919	0.00119486	0.777501	0.000285984
Q8BH80	Vesicle-associated membrane protein, associated protein B and C (Vesicle-associated membrane protein-associated protein B)	Vapb mCG_13760	243			1.18546	0.0212558
Q8BMS1	Trifunctional enzyme subunit alpha, mitochondrial (TP-alpha) [Includes: Long-chain enoyl-CoA hydratase (EC 4.2.1.17); Long chain 3-hydroxyacyl-CoA dehydrogenase (EC 1.1.1.211)]	Hadha	763	0.778898	0.00257125	0.877802	0.0323618
Q8BMX6	Putative uncharacterized protein (Fragment)	Ppid	109	1.18159	0.023555
Q8BPD3	Putative uncharacterized protein	Prdx6	178			0.868133	0.0327498
Q8C1Z9	Putative uncharacterized protein		159	1.20146	0.0372502	1.20146	0.037243
Q8C553	Putative uncharacterized protein (Fragment)	Lmnb1	413			1.20595	0.000712393
Q8C878-2	NEDD8-activating enzyme E1 catalytic subunit (EC 6.3.2.-) (NEDD8-activating enzyme E1C) (Ubiquitin-activating enzyme E1C) (Ubiquitin-like modifier-activating enzyme 3) (Ubiquitin-activating enzyme 3)	Uba3 Ube1c	462	0.82184	0.00349806	0.862457	0.0209124
Q8CE19	Putative uncharacterized protein	Syn2	313	1.41068	7.16652e-05	1.41018	7.23691e-05
Q8CGP7	Histone H2A type 1-K	Hist1h2ak	130			1.13587	0.0326728
Q8R1Q8	Cytoplasmic dynein 1 light intermediate chain 1 (Dynein light chain A) (DLC-A) (Dynein light intermediate chain 1, cytosolic)	Dync1li1 Dncli1 Dnclic1	523			0.817699	0.0467161
Q8VEH5	EPM2A-interacting protein 1 (Laforin-interacting protein)	Epm2aip1 Kiaa0766	606			0.850297	0.00912762
Q91V12-2	Cytosolic acyl coenzyme A thioester hydrolase (EC 3.1.2.2) (Acyl-CoA thioesterase 7) (Brain acyl-CoA hydrolase) (BACH) (CTE-IIa) (CTE-II) (Long chain acyl-CoA thioester hydrolase)	Acot7 Bach	381	1.11183	0.0326991
Q91X76	5'-nucleotidase domain containing 2 (Protein Nt5dc2)	Nt5dc2	390			1.23773	0.0185853
Q91Y52	Signal transducer and activator of transcription 1 (Fragment)	Stat1	374	1.19565	0.033245
Q921E4	Receptor expression-enhancing protein	Reep5 Dp1	185	0.92823	0.0142453
Q921Z9	Mannose-6-phosphate isomerase (EC 5.3.1.8)	Mpi	423	0.764076	0.0328923	0.783489	0.0450943
Q922R8	Protein disulfide-isomerase A6 (EC 5.3.4.1) (Thioredoxin domain-containing protein 7)	Pdia6 Txndc7	440	0.652266	0.0418381
Q99020	Heterogeneous nuclear ribonucleoprotein A/B (hnRNP A/B) (CArG-binding factor-A) (CBF-A)	Hnrnpab Cbf-a Cgbfa Hnrpab	285	1.08235	0.0414522
Q99L75	Heat shock protein 4	Hspa4	841	0.931716	0.0297079	0.925835	0.019119
Q99LX0	Protein deglycase DJ-1 (EC 3.1.2.-) (EC 3.5.1.-) (Parkinson disease protein 7 homolog)	Park7	189	0.85246	0.0344251
Q99PG2-2	Opioid growth factor receptor (OGFr) (Zeta-type opioid receptor)	Ogfr	633			0.893684	0.00210858
Q9CQB4	Cytochrome b-c1 complex subunit 7	Uqcrb mCG_67985	111	1.11731	0.0374845	1.11972	0.035125
Q9CQV8-2	14-3-3 protein beta/alpha (Protein kinase C inhibitor protein 1) (KCIP-1) [Cleaved into: 14-3-3 protein beta/alpha, N-terminally processed]	Ywhab	246	0.90121	0.0318932	0.855463	0.00255802
Q9CS06	Putative uncharacterized protein (Fragment)	Cct8	458			0.941456	0.0457314
Q9CS69	Putative uncharacterized protein (Fragment)	Sltm	374			1.12673	0.0263482
Q9CSC2	Putative uncharacterized protein (Fragment)	Snx3	132	1.10832	0.0367052
Q9CWJ9	Bifunctional purine biosynthesis protein PURH [Includes: Phosphoribosylaminoimidazolecarboxamide formyltransferase (EC 2.1.2.3) (5-aminoimidazole-4-carboxamide ribonucleotide formyltransferase) (AICAR transformylase); IMP cyclohydrolase (EC 3.5.4.10) (ATIC) (IMP synthase) (Inosinicase)]	Atic Purh	592			1.06779	0.0241702
Q9CWS0	N(G),N(G)-dimethylarginine dimethylaminohydrolase 1 (DDAH-1) (Dimethylarginine dimethylaminohydrolase 1) (EC 3.5.3.18) (DDAHI) (Dimethylargininase-1)	Ddah1	285			0.880682	0.0291402
Q9CZX8	40S ribosomal protein S19	Rps19	145	0.92795	0.047123
Q9D2G2	Dihydrolipoyllysine-residue succinyltransferase component of 2-oxoglutarate dehydrogenase complex, mitochondrial (EC 2.3.1.61) (2-oxoglutarate dehydrogenase complex component E2) (OGDC-E2) (Dihydrolipoamide succinyltransferase component of 2-oxoglutarate dehydrogenase complex) (E2K)	Dlst	454			1.16474	0.00274061
Q9D2G2-2						1.10449	0.0187866
Q9D4C9-2	Clavesin-1 (Retinaldehyde-binding protein 1-like 1)	Clvs1 Rlbp1l1	354	0.932987	0.0241418
Q9D8N0	Elongation factor 1-gamma (EF-1-gamma) (eEF-1B gamma)	Eef1g	437			1.18311	0.0168613
Q9DAK9	14 kDa phosphohistidine phosphatase (EC 3.1.3.-) (Phosphohistidine phosphatase 1)	Phpt1 Php14	124			0.896929	0.00238819
Q9DCS9	NADH dehydrogenase [ubiquinone] 1 beta subcomplex subunit 10 (Complex I-PDSW) (CI-PDSW) (NADH-ubiquinone oxidoreductase PDSW subunit)	Ndufb10	176			1.14785	0.0327468
Q9JIS5	Synaptic vesicle glycoprotein 2A (Synaptic vesicle protein 2) (Synaptic vesicle protein 2A) (Calcium regulator SV2A)	Sv2a Kiaa0736 Sv2	742			0.876735	0.0277573
Q9JJV2	Profilin-2 (Profilin II)	Pfn2	140			0.874192	0.00736633
Q9JJV2-3						0.897544	0.0139136
Q9JM14	5'(3')-deoxyribonucleotidase, cytosolic type (EC 3.1.3.-) (Cytosolic 5',3'-pyrimidine nucleotidase) (Deoxy-5'-nucleotidase 1) (dNT-1)	Nt5c Dnt1	200	0.865342	0.0472359
Q9R0P3	S-formylglutathione hydrolase (FGH) (EC 3.1.2.12) (Esterase 10) (Esterase D) (Sid 478)	Esd Es10 Sid478	282	0.844799	0.00313092	0.779479	8.19668e-05
Q9R0P9	Ubiquitin carboxyl-terminal hydrolase isozyme L1 (UCH-L1) (EC 3.4.19.12) (EC 6.-.-.-) (Neuron cytoplasmic protein 9.5) (PGP 9.5) (PGP9.5) (Ubiquitin thioesterase L1)	Uchl1	223	0.919271	0.0424565	0.907213	0.0210459
Q9R0Y5	Adenylate kinase isoenzyme 1 (AK 1) (EC 2.7.4.3) (EC 2.7.4.6) (ATP-AMP transphosphorylase 1) (ATP:AMP phosphotransferase) (Adenylate monophosphate kinase) (Myokinase)	Ak1	194			0.822969	0.0483609
Q9R1P1	Proteasome subunit beta type-3 (EC 3.4.25.1) (Proteasome chain 13) (Proteasome component C10-II) (Proteasome theta chain)	Psmb3	205			0.715207	0.000951963
Q9WUL7	ADP-ribosylation factor-like protein 3	Arl3	182			0.91269	0.0209389
Q9WV02-2	RNA-binding motif protein, X chromosome (Heterogeneous nuclear ribonucleoprotein G) (hnRNP G) [Cleaved into: RNA-binding motif protein, X chromosome, N-terminally processed]	Rbmx Hnrnpg Hnrpg Rbmxp1 Rbmxrt	391	1.17047	0.00383032	1.26405	0.000125864
Q9Z204-4	Heterogeneous nuclear ribonucleoproteins C1/C2 (hnRNP C1/C2)	Hnrnpc Hnrpc	313			1.14898	0.00367113
Q9Z2I9	Succinyl-CoA ligase [ADP-forming] subunit beta, mitochondrial (EC 6.2.1.5) (ATP-specific succinyl-CoA synthetase subunit beta) (Succinyl-CoA synthetase beta-A chain) (SCS-betaA)	Sucla2	463			1.06859	0.00315129
Q9Z2Q6	Septin-5 (Cell division control-related protein 1) (CDCrel-1) (Peanut-like protein 1)	Sept5 Pnutl1	369	1.12326	0.00960418	1.19384	0.000283895
Q9Z2X1	Heterogeneous nuclear ribonucleoprotein F (hnRNP F) [Cleaved into: Heterogeneous nuclear ribonucleoprotein F, N-terminally processed]	Hnrnpf Hnrpf	415			0.835705	0.00397477
206

## Sheet: Results_MB
Protein ID	Protein name	Gene name	Length (aa)	MB1 1 uM		MB3
		Gene names	Length	Ratio	P.value	Ratio	Pvalue
A0AUM9	Eif2b3 protein	Eif2b3	365			0.861613	0.0264938
A1L0U3	Histone H3 (Fragment)	Hist1h3e	133	1.15182	0.00806096	1.2204	0.000476574
A2AE89	Glutathione S-transferase Mu 1 (Fragment)	Gstm1	201	1.13755	0.0185705	1.29757	3.96619e-05
A2AKT6	Exportin-1 (Fragment)	Xpo1	59	1.1646	0.0466409	1.26532	0.00946081
A2ARJ0	Signal transducing adapter molecule 1 (Fragment)	Stam	207			1.13219	0.0145311
A2ATI8	Golgi reassembly-stacking protein 2	Gorasp2	317	1.14127	0.0450049
B1ARA5	60S ribosomal protein L26	Rpl26	143	1.23309	0.0225458
B1AXY1	DnaJ homolog subfamily A member 1 (Fragment)	Dnaja1	278	1.1439	0.0101896
D3YU12	NmrA-like family domain-containing protein 1	Nmral1	299	0.730268	0.022168
D3Z2Z8	Neurocalcin-delta (Fragment)	Ncald	163	1.2006	0.0104355	1.22364	0.00532349
D3Z4S6	Transmembrane protein 132A	Tmem132a	687	0.781178	0.037088
E0CXA0	Hepatoma-derived growth factor (Fragment)	Hdgf	202			0.673883	0.00176881
E0CZ27	Histone H3 (Fragment)	H3f3a	119	0.938014	0.0334605	1.07337	0.0201559
E9PZF0	Nucleoside diphosphate kinase (EC 2.7.4.6)	Gm20390	267	0.837224	0.00304329
E9Q452	Tropomyosin alpha-1 chain	Tpm1	281	0.853837	0.00574775
E9Q7G1	Protein Tmed7	Tmed7	188			1.21442	0.0248204
E9QKZ2	Importin-9	Ipo9	1040			0.845606	0.0177824
F8WHP8	ATP synthase subunit f, mitochondrial	Atp5j2	76			0.809072	0.000338468
G3UXJ6	Heterogeneous nuclear ribonucleoprotein Q	Syncrip	448	1.07006	0.0250171
G3UY29	MCG22989, isoform CRA_a (Ras-related protein Rab-11B)	Rab11b mCG_22989	149	0.931463	0.0341478	0.839222	1.92622e-05
G3X9K3	Brefeldin A-inhibited guanine nucleotide-exchange protein 1 (BIG1) (Brefeldin A-inhibited GEP 1) (ADP-ribosylation factor guanine nucleotide-exchange factor 1)	Arfgef1	1846			0.786947	0.0401833
J3QN06	ATP-dependent (S)-NAD(P)H-hydrate dehydratase (EC 4.2.1.93) (ATP-dependent NAD(P)HX dehydratase) (Carbohydrate kinase domain-containing protein)	Carkd	272	0.805561	0.0226646
J3QPS8	Eukaryotic translation initiation factor 5A-1	Eif5a	76	0.826649	0.0246588	0.819739	0.0211673
O35737	Heterogeneous nuclear ribonucleoprotein H (hnRNP H) [Cleaved into: Heterogeneous nuclear ribonucleoprotein H, N-terminally processed]	Hnrnph1 Hnrph Hnrph1	449			1.20181	0.0389018
O35864	COP9 signalosome complex subunit 5 (SGN5) (Signalosome subunit 5) (EC 3.4.-.-) (Jun activation domain-binding protein 1) (Kip1 C-terminus-interacting protein 2)	Cops5 Csn5 Jab1 Kic2	334			1.32174	0.0111583
O70251	Elongation factor 1-beta (EF-1-beta)	Eef1b Eef1b2	225	0.891563	0.030608
P03995-2	Glial fibrillary acidic protein (GFAP)	Gfap	430	1.15828	0.000232557
P05064	Fructose-bisphosphate aldolase A (EC 4.1.2.13) (Aldolase 1) (Muscle-type aldolase)	Aldoa Aldo1	364	0.853171	0.0399588
P06837	Neuromodulin (Axonal membrane protein GAP-43) (Calmodulin-binding protein P-57) (Growth-associated protein 43)	Gap43 Basp2	227			0.86159	0.000483282
P07356	Annexin A2 (Annexin II) (Annexin-2) (Calpactin I heavy chain) (Calpactin-1 heavy chain) (Chromobindin-8) (Lipocortin II) (Placental anticoagulant protein IV) (PAP-IV) (Protein I) (p36)	Anxa2 Anx2 Cal1h	339			0.901256	0.00606791
P08551	Neurofilament light polypeptide (NF-L) (68 kDa neurofilament protein) (Neurofilament triplet L protein)	Nefl Nf68 Nfl	543	0.921089	0.0250636
P08752	Guanine nucleotide-binding protein G(i) subunit alpha-2 (Adenylate cyclase-inhibiting G alpha protein)	Gnai2 Gnai-2	355	1.31481	0.0485695
P09671	Superoxide dismutase [Mn], mitochondrial (EC 1.15.1.1)	Sod2 Sod-2	222	1.29281	0.000221229	1.44042	2.75645e-06
P10852	4F2 cell-surface antigen heavy chain (4F2hc) (Solute carrier family 3 member 2) (CD antigen CD98)	Slc3a2 Mdu1	526			1.17643	0.00525322
P10922	Histone H1.0 (Histone H1') (Histone H1(0)) (MyD196) [Cleaved into: Histone H1.0, N-terminally processed]	H1f0 H1fv	194			1.19269	0.033236
P12658	Calbindin (Calbindin D28) (D-28K) (PCD-29) (Spot 35 protein) (Vitamin D-dependent calcium-binding protein, avian-type)	Calb1	261			0.925134	0.0166389
P12787	Cytochrome c oxidase subunit 5A, mitochondrial (Cytochrome c oxidase polypeptide Va)	Cox5a	146	1.20457	0.0211552
P14733	Lamin-B1	Lmnb1	588			1.1047	0.0499196
P16014	Secretogranin-1 (Chromogranin-B) (CgB) (Secretogranin I) (SgI) [Cleaved into: CCB peptide; PE-11]	Chgb Scg-1 Scg1	677			0.743223	0.00171836
P18760	Cofilin-1 (Cofilin, non-muscle isoform)	Cfl1	166	1.25819	0.00264127
P20152	Vimentin	Vim	466	1.22188	0.00419466
P21107-2	Tropomyosin alpha-3 chain (Gamma-tropomyosin) (Tropomyosin-3)	Tpm3 Tpm-5 Tpm5	285	0.906873	0.000920655	0.922648	0.00444874
P24369	Peptidyl-prolyl cis-trans isomerase B (PPIase B) (EC 5.2.1.8) (CYP-S1) (Cyclophilin B) (Rotamase B) (S-cyclophilin) (SCYLP)	Ppib	216	0.923909	0.024936	0.929812	0.0373294
P27773	Protein disulfide-isomerase A3 (EC 5.3.4.1) (58 kDa glucose-regulated protein) (58 kDa microsomal protein) (p58) (Disulfide isomerase ER-60) (Endoplasmic reticulum resident protein 57) (ER protein 57) (ERp57) (Endoplasmic reticulum resident protein 60) (ER protein 60) (ERp60)	Pdia3 Erp Erp60 Grp58	505			0.725876	0.0428984
P29595	NEDD8 (Neddylin) (Neural precursor cell expressed developmentally down-regulated protein 8) (NEDD-8) (Ubiquitin-like protein Nedd8)	Nedd8 Nedd-8	81	0.841989	0.00220706	0.906637	0.0411909
P31786	Acyl-CoA-binding protein (ACBP) (Diazepam-binding inhibitor) (DBI) (Endozepine) (EP)	Dbi	87	1.53073	0.000139255
P32261	Antithrombin-III (ATIII) (Serpin C1)	Serpinc1 At3	465	1.09184	0.01799	1.40971	2.27854e-08
P39053-3	Dynamin-1 (EC 3.6.5.5)	Dnm1 Dnm Kiaa4093	867	1.08862	0.0444794
P42932	T-complex protein 1 subunit theta (TCP-1-theta) (CCT-theta)	Cct8 Cctq	548			0.933233	0.0101999
P47963	60S ribosomal protein L13 (A52)	Rpl13	211	0.935278	0.0416198	0.905811	0.0044011
P48678-3	Prelamin-A/C [Cleaved into: Lamin-A/C]	Lmna Lmn1	665	1.24415	0.0234767
P48962	ADP/ATP translocase 1 (ADP,ATP carrier protein 1) (ADP,ATP carrier protein, heart/skeletal muscle isoform T1) (Adenine nucleotide translocator 1) (ANT 1) (Solute carrier family 25 member 4) (mANC1)	Slc25a4 Anc1 Ant1	298	1.13123	0.0141842
P51150	Ras-related protein Rab-7a	Rab7a Rab7	207			1.09451	0.0285669
P51863	V-type proton ATPase subunit d 1 (V-ATPase subunit d 1) (P39) (Physophilin) (V-ATPase 40 kDa accessory protein) (V-ATPase AC39 subunit) (Vacuolar proton pump subunit d 1)	Atp6v0d1 Atp6d	351	1.0857	0.01242	1.06877	0.0381943
P53996-2	Cellular nucleic acid-binding protein (CNBP) (Zinc finger protein 9)	Cnbp Cnbp1 Znf9	178	0.912641	0.0458688
P56812	Programmed cell death protein 5 (TF-1 cell apoptosis-related protein 19) (Protein TFAR19)	Pdcd5 Tfar19	126	1.10404	0.00111058	1.05082	0.0479105
P57776-3	Elongation factor 1-delta (EF-1-delta)	Eef1d	281	1.16412	0.0432064
P60487	Pyridoxal phosphate phosphatase (PLP phosphatase) (EC 3.1.3.3) (EC 3.1.3.74) (Chronophin)	Pdxp Cin Plp Plpp	292			1.19227	0.0361912
P60766	Cell division control protein 42 homolog (G25K GTP-binding protein)	Cdc42	191			1.10142	0.0216081
P60879-2	Synaptosomal-associated protein 25 (SNAP-25) (Super protein) (SUP) (Synaptosomal-associated 25 kDa protein)	Snap25 Snap	206	1.124	0.00164376	1.07274	0.0417875
P61205	ADP-ribosylation factor 3	Arf3	181			1.12201	0.0232923
P62806	Histone H4	Hist1h4a; Hist1h4b H4-53; Hist1h4c H4-12; Hist1h4d; Hist1h4f; Hist1h4h; Hist1h4i; Hist1h4j; Hist1h4k; Hist1h4m; Hist2h4a Hist2h4; Hist4h4	103	0.853216	0.00186778
P62827	GTP-binding nuclear protein Ran (GTPase Ran) (Ras-like protein TC4) (Ras-related nuclear protein)	Ran Rasl2-8	216			1.10343	0.0441619
P62855	40S ribosomal protein S26	Rps26	115			0.872009	0.0220386
P62983	Ubiquitin-40S ribosomal protein S27a (Ubiquitin carboxyl extension protein 80) [Cleaved into: Ubiquitin; 40S ribosomal protein S27a]	Rps27a Uba80 Ubcep1	156			1.19103	0.0432185
P63001	Ras-related C3 botulinum toxin substrate 1 (p21-Rac1)	Rac1	192	1.10681	0.0482067
P63005-2	Platelet-activating factor acetylhydrolase IB subunit alpha (Lissencephaly-1 protein) (LIS-1) (PAF acetylhydrolase 45 kDa subunit) (PAF-AH 45 kDa subunit) (PAF-AH alpha) (PAFAH alpha)	Pafah1b1 Lis-1 Lis1 Pafaha	410	1.09835	0.0098888
P63038	60 kDa heat shock protein, mitochondrial (60 kDa chaperonin) (Chaperonin 60) (CPN60) (HSP-65) (Heat shock protein 60) (HSP-60) (Hsp60) (Mitochondrial matrix protein P1)	Hspd1 Hsp60	573	1.08552	0.0187409
P63073	Eukaryotic translation initiation factor 4E (eIF-4E) (eIF4E) (mRNA cap-binding protein) (eIF-4F 25 kDa subunit)	Eif4e	217	1.06371	0.0124062	1.05522	0.0244896
P68037	Ubiquitin-conjugating enzyme E2 L3 (EC 6.3.2.19) (UbcM4) (Ubiquitin carrier protein L3) (Ubiquitin-protein ligase L3)	Ube2l3 Ubce7	154			1.12801	0.0231781
P68254-2	14-3-3 protein theta (14-3-3 protein tau)	Ywhaq	245			1.1397	0.00525778
P68372	Tubulin beta-4B chain (Tubulin beta-2C chain)	Tubb4b Tubb2c	445			1.06962	0.0356954
P68373	Tubulin alpha-1C chain (Alpha-tubulin 6) (Alpha-tubulin isotype M-alpha-6) (Tubulin alpha-6 chain)	Tuba1c Tuba6	449	0.803792	0.0220603
P80313	T-complex protein 1 subunit eta (TCP-1-eta) (CCT-eta)	Cct7 Ccth	544	0.904289	0.0157006
P84089	Enhancer of rudimentary homolog (Mer)	Erh	104	0.906818	0.0435657
Q01853	Transitional endoplasmic reticulum ATPase (TER ATPase) (EC 3.6.4.6) (15S Mg(2+)-ATPase p97 subunit) (Valosin-containing protein) (VCP)	Vcp	806	0.932832	0.0329088
Q05CD8	Reticulon	Rtn1	68			1.35798	0.0137515
Q05CK2	Rpl18a protein	Rpl18a	151			0.894489	7.09349e-05
Q06185	ATP synthase subunit e, mitochondrial (ATPase subunit e)	Atp5i Atp5k Lfm-1 Lfm1	71	0.899076	0.00231441	0.92457	0.00836919
Q0P6B2	Far upstream element (FUSE) binding protein 1 (Far upstream element (FUSE) binding protein 1, isoform CRA_c)	Fubp1 mCG_115545	640			1.11776	0.0225538
Q3TF87	Putative uncharacterized protein	Dars	501	1.14069	0.0494415
Q3TIP8	Chloride intracellular channel protein	Clic1	241			1.1086	0.0327694
Q3TL33	Putative uncharacterized protein	Calu	315	1.32116	0.0477907
Q3TL79	Putative uncharacterized protein	Ahsa1	338	0.808173	0.00907095
Q3TPC5	Serine/threonine-protein phosphatase 2A 55 kDa regulatory subunit B (Fragment)	Ppp2r2a	403	1.30931	0.0259541
Q3TQ66	Putative uncharacterized protein (Fragment)	Hnrnpm Hnrpm	366			0.898248	0.0178101
Q3TW28	Putative uncharacterized protein	Tpp2	1249			0.9043	0.0407973
Q3TWT5	Putative uncharacterized protein	Asah1	394			1.13363	0.00137794
Q3TYE5	Limbic system-associated membrane protein	Lsamp	338			0.867051	0.00151717
Q3U0V1	Far upstream element-binding protein 2 (FUSE-binding protein 2) (KH type-splicing regulatory protein) (KSRP)	Khsrp Fubp2	748			1.15604	0.0021966
Q3U144	Putative uncharacterized protein (Fragment)	Slc3a2	400	1.09846	0.0107886	1.0868	0.0217223
Q3U281	Putative uncharacterized protein	Sar1b Sara2	198	0.839107	0.0252875
Q3U8D2	Putative uncharacterized protein	St13	371	1.10076	0.00804545	1.17686	6.54147e-05
Q3U9V1	Putative uncharacterized protein	St13	371	0.926039	0.0138778
Q3UCF0	Proteasome subunit alpha type (EC 3.4.25.1)	Psma4	261			1.11136	0.0329925
Q3UDR2	Protein disulfide-isomerase (EC 5.3.4.1) (Fragment)	P4hb	505			0.932186	0.0335971
Q3UDY7	Putative uncharacterized protein (Fragment)	Dpp3	583	0.227664	0.01355
Q3UUG6-2	TBC1 domain family member 24	Tbc1d24 Kiaa1171	561			1.22343	0.0256419
Q3UW32	Putative uncharacterized protein (Fragment)	Anp32b	248	1.15741	0.0444697
Q3UXI9	Putative uncharacterized protein	Ilf2	390			1.15749	0.0355831
Q3V1Z7	Putative uncharacterized protein	Ddx1	740			0.800361	0.0442417
Q4FJM2	Cdkn1b protein	Cdkn1b	197	1.16677	0.00653754	1.18737	0.00294027
Q4V9X9	Rpl23a protein (Fragment)	Rpl23a	155	1.13302	0.042743
Q501J6	Probable ATP-dependent RNA helicase DDX17 (EC 3.6.4.13) (DEAD box protein 17)	Ddx17	650			0.823796	0.00623093
Q58EV2	Apoa1 protein	Apoa1	198			1.44243	0.0172359
Q5BL09	Npm1 protein	Npm1	257	1.09756	0.0485866
Q5RKP0	Vat1 protein (Fragment)	Vat1	401			1.18993	0.0465063
Q5SX48	Mitochondrial 2-oxoglutarate/malate carrier protein (Fragment)	Slc25a11	76	0.855747	0.0071391
Q60605	Myosin light polypeptide 6 (17 kDa myosin light chain) (LC17) (Myosin light chain 3) (MLC-3) (Myosin light chain alkali 3) (Myosin light chain A3) (Smooth muscle and nonmuscle myosin light chain alkali 6)	Myl6 Myln	151	0.872646	0.0438101
Q60692	Proteasome subunit beta type-6 (EC 3.4.25.1) (Low molecular mass protein 19) (Macropain delta chain) (Multicatalytic endopeptidase complex delta chain) (Proteasome delta chain) (Proteasome subunit Y)	Psmb6 Lmp19	238	0.901877	0.0483367
Q60972	Histone-binding protein RBBP4 (Chromatin assembly factor 1 subunit C) (CAF-1 subunit C) (Chromatin assembly factor I p48 subunit) (CAF-I 48 kDa subunit) (CAF-I p48) (Nucleosome-remodeling factor subunit RBAP48) (Retinoblastoma-binding protein 4) (RBBP-4) (Retinoblastoma-binding protein p48)	Rbbp4 Rbap48	425	0.895957	0.048365
Q61548-3	Clathrin coat assembly protein AP180 (91 kDa synaptosomal-associated protein) (Clathrin coat-associated protein AP180) (Phosphoprotein F1-20)	Snap91	901			0.859519	0.0436309
Q61792	LIM and SH3 domain protein 1 (LASP-1) (Metastatic lymph node gene 50 protein) (MLN 50)	Lasp1 Mln50	263			1.21276	0.0142517
Q61879	Myosin-10 (Cellular myosin heavy chain, type B) (Myosin heavy chain 10) (Myosin heavy chain, non-muscle IIb) (Non-muscle myosin heavy chain B) (NMMHC-B) (Non-muscle myosin heavy chain IIb) (NMMHC II-b) (NMMHC-IIB)	Myh10	1976			0.900412	0.0384936
Q62261	Spectrin beta chain, non-erythrocytic 1 (Beta-II spectrin) (Embryonic liver fodrin) (Fodrin beta chain)	Sptbn1 Elf Spnb-2 Spnb2 Sptb2	2363	1.17302	0.00898387
Q62351	Transferrin receptor protein 1 (TR) (TfR) (TfR1) (Trfr) (CD antigen CD71)	Tfrc Trfr	763	1.10343	0.0168964	1.1163	0.00853573
Q62425	Cytochrome c oxidase subunit NDUFA4	Ndufa4	82	0.915402	0.0128821
Q64433	10 kDa heat shock protein, mitochondrial (Hsp10) (10 kDa chaperonin) (Chaperonin 10) (CPN10)	Hspe1	102			0.941474	0.0300304
Q64669	NAD(P)H dehydrogenase [quinone] 1 (EC 1.6.5.2) (Azoreductase) (DT-diaphorase) (DTD) (Menadione reductase) (NAD(P)H:quinone oxidoreductase 1) (Phylloquinone reductase) (Quinone reductase 1) (QR1)	Nqo1 Dia4 Nmo1 Nmor1	274	1.22269	0.0319927	1.42373	0.00333337
Q68FD5	Clathrin heavy chain 1	Cltc	1675	0.915454	0.0348356	0.904295	0.0180486
Q6DFW4	Nucleolar protein 58 (MSSP) (Nucleolar protein 5) (SIK-similar protein)	Nop58 Nol5	536	0.646773	0.0126805
Q6GQT1	Alpha-2-macroglobulin-P (Alpha-2-macroglobulin)	A2mp A2m	1474			1.54786	2.07343e-05
Q6IRU5	Clathrin light chain B (Lcb)	Cltb	229			1.12861	0.0151094
Q6KAM8	MFLJ00343 protein (Fragment)	Flna mFLJ00343	1952	0.686208	0.015551
Q6NXX7	Abce1 protein (Fragment)	Abce1	575			0.897415	0.0259138
Q6P9L9	Eef2 protein (Fragment)	Eef2	843	1.17802	0.000200351	1.16053	0.000533538
Q6PHZ1	Rpl17 protein	Rpl17	184			0.931737	0.014615
Q6ZQ38	Cullin-associated NEDD8-dissociated protein 1 (Cullin-associated and neddylation-dissociated protein 1) (p120 CAND1)	Cand1 D10Ertd516e Kiaa0829	1230			1.08734	0.039163
Q6ZWV7	60S ribosomal protein L35	Rpl35	123			0.881299	0.0338423
Q6ZWZ6	40S ribosomal protein S12	Rps12 Rps12-ps11 mCG_132913 mCG_6749	132	1.10798	0.0153964	1.1001	0.0229726
Q7TMI0	Psmd11 protein (Fragment)	Psmd11	416	4.32637	0.0432836
Q7TMY8-2	E3 ubiquitin-protein ligase HUWE1 (EC 6.3.2.-) (E3Histone) (HECT, UBA and WWE domain-containing protein 1) (Upstream regulatory element-binding protein 1) (URE-B1) (URE-binding protein 1)	Huwe1 Kiaa0312 Ureb1	4377			0.791782	0.00458594
Q7TSJ2-2	Microtubule-associated protein 6 (MAP-6) (Stable tubule-only polypeptide) (STOP)	Map6 Mtap6	906	1.18909	0.0372558
Q80U51	MKIAA0275 protein (Fragment)	Spock2 mKIAA0275	380	0.851408	0.0129956
Q80YA7	Dipeptidyl peptidase 8 (DP8) (EC 3.4.14.5) (Dipeptidyl peptidase VIII) (DPP VIII)	Dpp8	892	1.64332	0.0437695
Q8BGB7-2	Enolase-phosphatase E1 (EC 3.1.3.77) (2,3-diketo-5-methylthio-1-phosphopentane phosphatase) (MASA homolog)	Enoph1 Masa	257	0.909449	0.0189648
Q8BJU0-2	Small glutamine-rich tetratricopeptide repeat-containing protein alpha (Alpha-SGT)	Sgta Sgt	315			0.890882	0.0134789
Q8BMF4	Dihydrolipoyllysine-residue acetyltransferase component of pyruvate dehydrogenase complex, mitochondrial (EC 2.3.1.12) (Dihydrolipoamide acetyltransferase component of pyruvate dehydrogenase complex) (Pyruvate dehydrogenase complex component E2) (PDC-E2) (PDCE2)	Dlat	642			0.897258	0.0336715
Q8BMX6	Putative uncharacterized protein (Fragment)	Ppid	109	1.20824	0.0141787	1.24851	0.00584978
Q8BU30	Isoleucine--tRNA ligase, cytoplasmic (EC 6.1.1.5) (Isoleucyl-tRNA synthetase) (IRS) (IleRS)	Iars	1262			0.749418	0.0125727
Q8C1Z9	Putative uncharacterized protein		159			0.837347	0.0411665
Q8C3W1	Uncharacterized protein C1orf198 homolog		322			1.19556	0.00878807
Q8C684	Putative uncharacterized protein (Fragment)	Snx30	245	1.17835	0.0126104	1.14305	0.0361424
Q8CDV2	Calcium/calmodulin-dependent 3',5'-cyclic nucleotide phosphodiesterase 1C	Pde1c	603			1.15922	0.0154953
Q8CGP7	Histone H2A type 1-K	Hist1h2ak	130	0.868736	0.0215354
Q8CIF2	10-formyltetrahydrofolate dehydrogenase (EC 1.5.1.6)	Aldh1l1 Fthfd	902			0.740101	0.0367474
Q8JZM4	Delta and Notch-like epidermal growth factor-related receptor (Brain EGF repeat-containing transmembrane protein)	Dner Bet Bret	737			0.895166	0.0257841
Q8K0C9	GDP-mannose 4,6 dehydratase (EC 4.2.1.47) (GDP-D-mannose dehydratase) (GMD)	Gmds	372	0.768281	0.0399294
Q8K183	Pyridoxal kinase (EC 2.7.1.35) (Pyridoxine kinase)	Pdxk Pkh	312	0.880122	0.0413956	0.85332	0.0137861
Q91V61-2	Sideroflexin-3	Sfxn3	321	0.769031	7.54367e-05	0.872066	0.00687372
Q91VM5	RNA binding motif protein, X-linked-like-1 (Heterogeneous nuclear ribonucleoprotein G-like 1) (RNA binding motif protein, X chromosome retrogene)	Rbmxl1 Rbmxrt	388			1.33965	0.0316469
Q91X76	5'-nucleotidase domain containing 2 (Protein Nt5dc2)	Nt5dc2	390	0.781605	0.00866076
Q91YJ2	Sorting nexin-4	Snx4	450			1.31194	0.0477184
Q99KJ8	Dynactin subunit 2 (50 kDa dynein-associated polypeptide) (Dynactin complex 50 kDa subunit) (DCTN-50) (Growth cone membrane protein 23-48K) (GMP23-48K) (p50 dynamitin)	Dctn2	402			1.12588	0.0281817
Q99PL5-2	Ribosome-binding protein 1 (Ribosome receptor protein) (RRp) (mRRp)	Rrbp1	1605			0.753333	0.01482
Q9CQB4	Cytochrome b-c1 complex subunit 7	Uqcrb mCG_67985	111	1.16651	0.0117903
Q9CS69	Putative uncharacterized protein (Fragment)	Sltm	374	1.13729	0.0181543
Q9CSN9	Putative uncharacterized protein (Fragment)	Rps23	133			1.17262	0.0114649
Q9CT23	Putative uncharacterized protein (Fragment)	Eif3e Eif3s6	422	0.859956	0.0187058
Q9CU14	Putative uncharacterized protein (Fragment)	Snx3	132	1.09933	0.0285119
Q9CZX8	40S ribosomal protein S19	Rps19	145	0.92913	0.049346
Q9D051	Pyruvate dehydrogenase E1 component subunit beta, mitochondrial (PDHE1-B) (EC 1.2.4.1)	Pdhb	359	0.924537	0.0478573
Q9D0J8	Parathymosin	Ptms	101	0.877974	0.0382933	0.84775	0.0109176
Q9D172	ES1 protein homolog, mitochondrial	D10Jhu81e	266	1.20785	0.00155581
Q9D1D4-2	Transmembrane emp24 domain-containing protein 10 (21 kDa transmembrane-trafficking protein) (Transmembrane protein Tmp21) (p24 family protein delta-1) (p24delta1)	Tmed10 Tmp21	219			1.10443	0.0374526
Q9D4C9-2	Clavesin-1 (Retinaldehyde-binding protein 1-like 1)	Clvs1 Rlbp1l1	354			0.862534	0.00108544
Q9D586	Ciliary neurotrophic factor receptor subunit alpha	Cntfr	113	1.27376	0.0113431
Q9D7N9	Adipocyte plasma membrane-associated protein (Protein DD16)	Apmap	415			0.715489	0.0181584
Q9DC69	NADH dehydrogenase [ubiquinone] 1 alpha subcomplex subunit 9, mitochondrial (Complex I-39kD) (CI-39kD) (NADH-ubiquinone oxidoreductase 39 kDa subunit)	Ndufa9	377			0.788793	0.0237406
Q9DCS9	NADH dehydrogenase [ubiquinone] 1 beta subcomplex subunit 10 (Complex I-PDSW) (CI-PDSW) (NADH-ubiquinone oxidoreductase PDSW subunit)	Ndufb10	176			0.85786	0.0236427
Q9JJV2	Profilin-2 (Profilin II)	Pfn2	140			0.893001	0.0201848
Q9QUM9	Proteasome subunit alpha type-6 (EC 3.4.25.1) (Macropain iota chain) (Multicatalytic endopeptidase complex iota chain) (Proteasome iota chain)	Psma6	246	1.10452	0.00272481	1.12722	0.000525766
Q9R1P1	Proteasome subunit beta type-3 (EC 3.4.25.1) (Proteasome chain 13) (Proteasome component C10-II) (Proteasome theta chain)	Psmb3	205	0.819239	0.0289725
Q9Z2I9	Succinyl-CoA ligase [ADP-forming] subunit beta, mitochondrial (EC 6.2.1.5) (ATP-specific succinyl-CoA synthetase subunit beta) (Succinyl-CoA synthetase beta-A chain) (SCS-betaA)	Sucla2	463	1.05293	0.0177355
V9GWT6	ELKS/Rab6-interacting/CAST family member 1	Erc1	948			1.19006	0.0476674
X2D841	Amino acid transporter	Slc1a2	557			0.800259	0.00654497
176	206	382

## Sheet: MB
Protein ID	Protein name	Gene name	Length (aa)	MB1 1 uM		MB3
		Gene names	Length	Ratio	P.value	Ratio	Pvalue
A0AUM9	Eif2b3 protein	Eif2b3	365			0.861613	0.0264938
A1L0U3	Histone H3 (Fragment)	Hist1h3e	133	1.15182	0.00806096	1.2204	0.000476574
A2AE89	Glutathione S-transferase Mu 1 (Fragment)	Gstm1	201	1.13755	0.0185705	1.29757	3.96619e-05
A2AKT6	Exportin-1 (Fragment)	Xpo1	59	1.1646	0.0466409	1.26532	0.00946081
B1ARA5	60S ribosomal protein L26	Rpl26	143	1.23309	0.0225458
D3YU12	NmrA-like family domain-containing protein 1	Nmral1	299	0.730268	0.022168
D3Z2Z8	Neurocalcin-delta (Fragment)	Ncald	163	1.2006	0.0104355	1.22364	0.00532349
D3Z4S6	Transmembrane protein 132A	Tmem132a	687	0.781178	0.037088
E0CXA0	Hepatoma-derived growth factor (Fragment)	Hdgf	202			0.673883	0.00176881
E9Q7G1	Protein Tmed7	Tmed7	188			1.21442	0.0248204
G3X9K3	Brefeldin A-inhibited guanine nucleotide-exchange protein 1 (BIG1) (Brefeldin A-inhibited GEP 1) (ADP-ribosylation factor guanine nucleotide-exchange factor 1)	Arfgef1	1846			0.786947	0.0401833
O35737	Heterogeneous nuclear ribonucleoprotein H (hnRNP H) [Cleaved into: Heterogeneous nuclear ribonucleoprotein H, N-terminally processed]	Hnrnph1 Hnrph Hnrph1	449			1.20181	0.0389018
O35864	COP9 signalosome complex subunit 5 (SGN5) (Signalosome subunit 5) (EC 3.4.-.-) (Jun activation domain-binding protein 1) (Kip1 C-terminus-interacting protein 2)	Cops5 Csn5 Jab1 Kic2	334			1.32174	0.0111583
P08752	Guanine nucleotide-binding protein G(i) subunit alpha-2 (Adenylate cyclase-inhibiting G alpha protein)	Gnai2 Gnai-2	355	1.31481	0.0485695
P09671	Superoxide dismutase [Mn], mitochondrial (EC 1.15.1.1)	Sod2 Sod-2	222	1.29281	0.000221229	1.44042	2.75645e-06
P12787	Cytochrome c oxidase subunit 5A, mitochondrial (Cytochrome c oxidase polypeptide Va)	Cox5a	146	1.20457	0.0211552
P16014	Secretogranin-1 (Chromogranin-B) (CgB) (Secretogranin I) (SgI) [Cleaved into: CCB peptide; PE-11]	Chgb Scg-1 Scg1	677			0.743223	0.00171836
P18760	Cofilin-1 (Cofilin, non-muscle isoform)	Cfl1	166	1.25819	0.00264127
P20152	Vimentin	Vim	466	1.22188	0.00419466
P27773	Protein disulfide-isomerase A3 (EC 5.3.4.1) (58 kDa glucose-regulated protein) (58 kDa microsomal protein) (p58) (Disulfide isomerase ER-60) (Endoplasmic reticulum resident protein 57) (ER protein 57) (ERp57) (Endoplasmic reticulum resident protein 60) (ER protein 60) (ERp60)	Pdia3 Erp Erp60 Grp58	505			0.725876	0.0428984
P31786	Acyl-CoA-binding protein (ACBP) (Diazepam-binding inhibitor) (DBI) (Endozepine) (EP)	Dbi	87	1.53073	0.000139255
P32261	Antithrombin-III (ATIII) (Serpin C1)	Serpinc1 At3	465	1.09184	0.01799	1.40971	2.27854e-08
P48678-3	Prelamin-A/C [Cleaved into: Lamin-A/C]	Lmna Lmn1	665	1.24415	0.0234767
Q05CD8	Reticulon	Rtn1	68			1.35798	0.0137515
Q3TL33	Putative uncharacterized protein	Calu	315	1.32116	0.0477907
Q3TPC5	Serine/threonine-protein phosphatase 2A 55 kDa regulatory subunit B (Fragment)	Ppp2r2a	403	1.30931	0.0259541
Q3UDY7	Putative uncharacterized protein (Fragment)	Dpp3	583	0.227664	0.01355
Q3UUG6-2	TBC1 domain family member 24	Tbc1d24 Kiaa1171	561			1.22343	0.0256419
Q58EV2	Apoa1 protein	Apoa1	198			1.44243	0.0172359
Q61792	LIM and SH3 domain protein 1 (LASP-1) (Metastatic lymph node gene 50 protein) (MLN 50)	Lasp1 Mln50	263			1.21276	0.0142517
Q64669	NAD(P)H dehydrogenase [quinone] 1 (EC 1.6.5.2) (Azoreductase) (DT-diaphorase) (DTD) (Menadione reductase) (NAD(P)H:quinone oxidoreductase 1) (Phylloquinone reductase) (Quinone reductase 1) (QR1)	Nqo1 Dia4 Nmo1 Nmor1	274	1.22269	0.0319927	1.42373	0.00333337
Q6DFW4	Nucleolar protein 58 (MSSP) (Nucleolar protein 5) (SIK-similar protein)	Nop58 Nol5	536	0.646773	0.0126805
Q6GQT1	Alpha-2-macroglobulin-P (Alpha-2-macroglobulin)	A2mp A2m	1474			1.54786	2.07343e-05
Q6KAM8	MFLJ00343 protein (Fragment)	Flna mFLJ00343	1952	0.686208	0.015551
Q7TMI0	Psmd11 protein (Fragment)	Psmd11	416	4.32637	0.0432836
Q7TMY8-2	E3 ubiquitin-protein ligase HUWE1 (EC 6.3.2.-) (E3Histone) (HECT, UBA and WWE domain-containing protein 1) (Upstream regulatory element-binding protein 1) (URE-B1) (URE-binding protein 1)	Huwe1 Kiaa0312 Ureb1	4377			0.791782	0.00458594
Q80YA7	Dipeptidyl peptidase 8 (DP8) (EC 3.4.14.5) (Dipeptidyl peptidase VIII) (DPP VIII)	Dpp8	892	1.64332	0.0437695
Q8BMX6	Putative uncharacterized protein (Fragment)	Ppid	109	1.20824	0.0141787	1.24851	0.00584978
Q8BU30	Isoleucine--tRNA ligase, cytoplasmic (EC 6.1.1.5) (Isoleucyl-tRNA synthetase) (IRS) (IleRS)	Iars	1262			0.749418	0.0125727
Q8CIF2	10-formyltetrahydrofolate dehydrogenase (EC 1.5.1.6)	Aldh1l1 Fthfd	902			0.740101	0.0367474
Q8K0C9	GDP-mannose 4,6 dehydratase (EC 4.2.1.47) (GDP-D-mannose dehydratase) (GMD)	Gmds	372	0.768281	0.0399294
Q91V61-2	Sideroflexin-3	Sfxn3	321	0.769031	7.54367e-05	0.872066	0.00687372
Q91VM5	RNA binding motif protein, X-linked-like-1 (Heterogeneous nuclear ribonucleoprotein G-like 1) (RNA binding motif protein, X chromosome retrogene)	Rbmxl1 Rbmxrt	388			1.33965	0.0316469
Q91X76	5'-nucleotidase domain containing 2 (Protein Nt5dc2)	Nt5dc2	390	0.781605	0.00866076
Q91YJ2	Sorting nexin-4	Snx4	450			1.31194	0.0477184
Q99PL5-2	Ribosome-binding protein 1 (Ribosome receptor protein) (RRp) (mRRp)	Rrbp1	1605			0.753333	0.01482
Q9D172	ES1 protein homolog, mitochondrial	D10Jhu81e	266	1.20785	0.00155581
Q9D586	Ciliary neurotrophic factor receptor subunit alpha	Cntfr	113	1.27376	0.0113431
Q9D7N9	Adipocyte plasma membrane-associated protein (Protein DD16)	Apmap	415			0.715489	0.0181584
Q9DC69	NADH dehydrogenase [ubiquinone] 1 alpha subcomplex subunit 9, mitochondrial (Complex I-39kD) (CI-39kD) (NADH-ubiquinone oxidoreductase 39 kDa subunit)	Ndufa9	377			0.788793	0.0237406
176	206	382
