# Supplementary material for: Manganese-induced neurotoxicity in cerebellar granule neurons due to perturbation of cell network pathways with potential implications for neurodegenerative disorders
Source: Royal Society of Chemistry journal article supplement (doi:10.1039/d0mt00085j), 2020-07-21
Supplement: d0mt00085j4.xlsx [file d0mt00085j4.xlsx]

## Sheet: CELL PROCESSES - PATHWAYS
CELL PROCESSES	PATHWAYS	OBSERVED GENES	FDR
METABOLISM OF PROTEINS	Ribosome	51	4.03e-67
	Metabolism of RNA	37	5.53e-25
	Ribosomal scanning and start codon recognition	19	9.76e-24
	Proteasome	19	1.96e-24
	Translation initiation complex formation	19	1.26e-23
	L13a-mediated translational silencing of Ceruloplasmin expression	19	1.43e-23
	Formation of a pool of free 40S subunits	17	2.45e-22
	AUF1 (hnRNP D0) binds and destabilizes mRNA	18	6.24e-22
	Formation of the ternary complex and subsequently the 43S complex	17	6.24e-22
	Regulation of mRNA stability by proteins that bind AU-rich elements	19	3.63e-21
	Metabolism of polyamines	19	4.9e-21
	Autodegradation of the E3 ubiquitin ligase COP1	17	3.63e-21
	Ubiquitin-dependent degradation of Cyclin D1	17	3.63e-21
	Ubiquitin Mediated Degradation of Phosphorylated Cdc25A	17	3.63e-21
	Regulation of ornithine decarboxylase (ODC)	17	3.64e-21
	Degradation of AXIN	17	4.64e-21
	SCF-beta-TrCP mediated degradation of Emi1	17	5.41e-21
	Degradation of DVL	17	8.4e-21
	Degradation of GLI1 by the proteasome	17	8.4e-21
	Downstream signaling events of B Cell Receptor (BCR)	18	9.2e-21
	Metabolism of amino acids and derivatives	24	1.81e-19
	Metabolism of proteins	44	2.65e-15
	Post-translational protein modification	25	6.34e-06
CELL METABOLISM	Oxidative phosphorylation	18	7.77e-16
	Metabolism	40	4.94e-11
	Metabolic pathways	33	3.37e-09
	The citric acid (TCA) cycle and respiratory electron transport	12	1.3e-09
	Formation of ATP by chemiosmotic coupling	6	3.43e-08
	Pyruvate metabolism and Citric Acid (TCA) cycle	6	9.05e-06
	Glyoxylate metabolism and glycine degradation	5	9.8e-06
	Carbon metabolism	8	3.58e-05
	Citrate cycle (TCA cycle)	5	6e-05
	Regulation of pyruvate dehydrogenase (PDH) complex	4	3.08e-05
NEUROTRANSMITTER SYSTEM	Serotonin Neurotransmitter Release Cycle	6	2.57e-08
	Dopamine Neurotransmitter Release Cycle	6	9.68e-08
	Acetylcholine Neurotransmitter Release Cycle	5	4.14e-07
	Norepinephrine Neurotransmitter Release Cycle	5	9.6e-07
	GABA synthesis release reuptake and degradation	5	9.6e-07
	Glutamate Neurotransmitter Release Cycle	5	2.93e-06
	Transmission across Chemical Synapses	7	0.0013
	Synaptic vesicle cycle	5	0.001
CELL SIGNALING	Downstream signaling events of B Cell Receptor (BCR)	18	9.2e-21
	Dectin-1 mediated noncanonical NF-kB signaling	17	9.93e-21
	NIK-->noncanonical NF-kB signaling	17	9.93e-21
	CLEC7A (Dectin-1) signaling	18	1.56e-19
	MAPK6/MAPK4 signaling	17	1.56e-19
	Interleukin-1 signaling	18	2.11e-19
	Downstream TCR signaling	17	1.95e-18
	Fc epsilon receptor (FCERI) signaling	18	5.08e-18
	Signaling by WNT	23	6.38e-18
	Beta-catenin independent WNT signaling	18	1.76e-17
	TCF dependent signaling in response to WNT	19	3e-16
	RAF/MAP kinase cascade	19	1.8e-14
	Signaling by Interleukins	21	4.64e-15
	Cytokine Signaling in Immune system	22	1.37e-13
	Intracellular signaling by second messengers	18	5.96e-13
	Signal Transduction	32	0.0014
	Signaling by Nuclear Receptors	6	0.0014
	Signaling by Retinoic Acid	4	0.0022
IMMUNE SYSTEM	Adaptive Immune System	20	2.15e-07
	Innate Immune System	22	1.33e-06
	Immune System	27	3.65e-05
CELL CYCLE	Ubiquitin Mediated Degradation of Phosphorylated Cdc25A	17	3.63e-21
	CDT1 association with the CDC6:ORC:origin complex	17	9.93e-21
	APC/C:Cdc20 mediated degradation of Securin	17	5.13e-20
	APC/C:Cdh1 mediated degradation of Cdc20 and other APC/C:Cdh1 targeted proteins in late mitosis/early G1	17	1.32e-19
	Cdc20:Phospho-APC/C mediated degradation of Cyclin A	17	1.32e-19
	CDK-mediated phosphorylation and removal of Cdc6	17	1.32e-19
	CDK-mediated phosphorylation and removal of Cdc6	17	1.32e-19
	G2/M Checkpoints	17	1.41e-15
	M Phase	21	1.42e-13
NEURODEGENARATIVE DISEASES	Alzheimer's disease	18	3.66e-14
	Parkinson's disease	16	3.54e-13
	Huntington's disease	16	2.29e-11
MMU-597592

## Sheet: enrichment.KEGG
#term ID	term description	observed gene count	background gene count	FDR	matching proteins in your network (IDs)	matching proteins in your network (labels)
mmu03010	Ribosome	51	128	4.03e-67	ENSMUSP00000000756	ENSMUSP00000003521	ENSMUSP00000004072	ENSMUSP00000004554	ENSMUSP00000006496	ENSMUSP00000008812	ENSMUSP00000017548	ENSMUSP00000025511	ENSMUSP00000029722	ENSMUSP00000031617	ENSMUSP00000032998	ENSMUSP00000034966	ENSMUSP00000035105	ENSMUSP00000038352	ENSMUSP00000046506	ENSMUSP00000048469	ENSMUSP00000054490	ENSMUSP00000058432	ENSMUSP00000058919	ENSMUSP00000069004	ENSMUSP00000071616	ENSMUSP00000073175	ENSMUSP00000076447	ENSMUSP00000079180	ENSMUSP00000079340	ENSMUSP00000079628	ENSMUSP00000080354	ENSMUSP00000080523	ENSMUSP00000080854	ENSMUSP00000081474	ENSMUSP00000086614	ENSMUSP00000099435	ENSMUSP00000099757	ENSMUSP00000099878	ENSMUSP00000099909	ENSMUSP00000102213	ENSMUSP00000103365	ENSMUSP00000103940	ENSMUSP00000104067	ENSMUSP00000106014	ENSMUSP00000110013	ENSMUSP00000110532	ENSMUSP00000110731	ENSMUSP00000110886	ENSMUSP00000118787
mmu03050	Proteasome	19	45	1.96e-24	ENSMUSP00000005923	ENSMUSP00000014913	ENSMUSP00000018430	ENSMUSP00000021412	ENSMUSP00000022803	ENSMUSP00000028083	ENSMUSP00000029082	ENSMUSP00000030642	ENSMUSP00000030769	ENSMUSP00000033008	ENSMUSP00000034369	ENSMUSP00000034848	ENSMUSP00000051657	ENSMUSP00000071054	ENSMUSP00000088057	ENSMUSP00000099436	ENSMUSP00000125548	ENSMUSP00000129767	ENSMUSP00000133499	Psma1	Psma2	Psma3	Psma4	Psma5	Psma6	Psma7	Psmb1	Psmb10	Psmb2	Psmb3	Psmb4	Psmb5	Psmb6	Psmb7	Psmb9	Psmc2	Psmc3	Psmd8
mmu00190	Oxidative phosphorylation	18	129	7.77e-16	ENSMUSP00000000090	ENSMUSP00000014457	ENSMUSP00000016396	ENSMUSP00000023210	ENSMUSP00000023608	ENSMUSP00000023677	ENSMUSP00000031637	ENSMUSP00000033176	ENSMUSP00000045284	ENSMUSP00000051222	ENSMUSP00000053145	ENSMUSP00000054856	ENSMUSP00000077744	ENSMUSP00000079944	ENSMUSP00000101006	ENSMUSP00000113022	ENSMUSP00000115419	ENSMUSP00000125504	Atp5d	Atp5e	Atp5f1	Atp5j	Atp5j2	Atp5k	Atp5o	Cox5a	Cox5b	Cox6c	Cox7c	Cyc1	Ndufa4	Uqcr10	Uqcrc2	Uqcrfs1	Uqcrh	Uqcrq
mmu05010	Alzheimer's disease	18	167	3.66e-14	ENSMUSP00000000090	ENSMUSP00000014457	ENSMUSP00000016396	ENSMUSP00000023210	ENSMUSP00000023608	ENSMUSP00000023677	ENSMUSP00000031637	ENSMUSP00000033176	ENSMUSP00000045284	ENSMUSP00000053145	ENSMUSP00000054856	ENSMUSP00000077744	ENSMUSP00000079944	ENSMUSP00000101006	ENSMUSP00000105709	ENSMUSP00000113022	ENSMUSP00000115419	ENSMUSP00000121358	Atp5d	Atp5e	Atp5f1	Atp5j	Atp5o	Calm1	Cox5a	Cox5b	Cox6c	Cox7c	Cyc1	Ide	Ndufa4	Uqcr10	Uqcrc2	Uqcrfs1	Uqcrh	Uqcrq
mmu04714	Thermogenesis	19	223	2.42e-13	ENSMUSP00000000090	ENSMUSP00000014457	ENSMUSP00000016396	ENSMUSP00000023210	ENSMUSP00000023608	ENSMUSP00000023677	ENSMUSP00000031637	ENSMUSP00000033176	ENSMUSP00000045284	ENSMUSP00000051222	ENSMUSP00000053145	ENSMUSP00000054856	ENSMUSP00000077744	ENSMUSP00000079944	ENSMUSP00000099878	ENSMUSP00000101006	ENSMUSP00000113022	ENSMUSP00000115419	ENSMUSP00000125504	Atp5d	Atp5e	Atp5f1	Atp5j	Atp5j2	Atp5k	Atp5o	Cox5a	Cox5b	Cox6c	Cox7c	Cyc1	Ndufa4	Rps6	Uqcr10	Uqcrc2	Uqcrfs1	Uqcrh	Uqcrq
mmu05012	Parkinson's disease	16	138	3.54e-13	ENSMUSP00000000090	ENSMUSP00000014457	ENSMUSP00000016396	ENSMUSP00000023210	ENSMUSP00000023608	ENSMUSP00000023677	ENSMUSP00000031637	ENSMUSP00000033176	ENSMUSP00000045284	ENSMUSP00000053145	ENSMUSP00000054856	ENSMUSP00000077744	ENSMUSP00000079944	ENSMUSP00000101006	ENSMUSP00000113022	ENSMUSP00000115419	Atp5d	Atp5e	Atp5f1	Atp5j	Atp5o	Cox5a	Cox5b	Cox6c	Cox7c	Cyc1	Ndufa4	Uqcr10	Uqcrc2	Uqcrfs1	Uqcrh	Uqcrq
mmu05016	Huntington's disease	16	187	2.29e-11	ENSMUSP00000000090	ENSMUSP00000014457	ENSMUSP00000016396	ENSMUSP00000023210	ENSMUSP00000023608	ENSMUSP00000023677	ENSMUSP00000031637	ENSMUSP00000033176	ENSMUSP00000045284	ENSMUSP00000053145	ENSMUSP00000054856	ENSMUSP00000077744	ENSMUSP00000079944	ENSMUSP00000101006	ENSMUSP00000113022	ENSMUSP00000115419	Atp5d	Atp5e	Atp5f1	Atp5j	Atp5o	Cox5a	Cox5b	Cox6c	Cox7c	Cyc1	Ndufa4	Uqcr10	Uqcrc2	Uqcrfs1	Uqcrh	Uqcrq
mmu01100	Metabolic pathways	33	1296	3.37e-09	ENSMUSP00000000090	ENSMUSP00000001304	ENSMUSP00000011058	ENSMUSP00000014457	ENSMUSP00000016396	ENSMUSP00000019323	ENSMUSP00000022268	ENSMUSP00000023210	ENSMUSP00000023608	ENSMUSP00000023677	ENSMUSP00000031637	ENSMUSP00000033176	ENSMUSP00000034567	ENSMUSP00000034856	ENSMUSP00000035743	ENSMUSP00000045284	ENSMUSP00000051222	ENSMUSP00000053145	ENSMUSP00000054856	ENSMUSP00000060346	ENSMUSP00000077744	ENSMUSP00000079944	ENSMUSP00000084846	ENSMUSP00000100045	ENSMUSP00000101006	ENSMUSP00000106481	ENSMUSP00000110434	ENSMUSP00000113022	ENSMUSP00000115419	ENSMUSP00000120976	ENSMUSP00000125504	ENSMUSP00000129704	ENSMUSP00000130898	Akr1b3	Aldoa	Atp5d	Atp5e	Atp5f1	Atp5j	Atp5j2	Atp5k	Atp5o	Ckb	Cox5a	Cox5b
mmu04260	Cardiac muscle contraction	10	75	6.37e-09	ENSMUSP00000000090	ENSMUSP00000014457	ENSMUSP00000023210	ENSMUSP00000033176	ENSMUSP00000045284	ENSMUSP00000053145	ENSMUSP00000054856	ENSMUSP00000077744	ENSMUSP00000079944	ENSMUSP00000115419	Cox5a	Cox5b	Cox6c	Cox7c	Cyc1	Uqcr10	Uqcrc2	Uqcrfs1	Uqcrh	Uqcrq
mmu04932	Non-alcoholic fatty liver disease (NAFLD)	11	146	1.98e-07	ENSMUSP00000000090	ENSMUSP00000014457	ENSMUSP00000023210	ENSMUSP00000031637	ENSMUSP00000033176	ENSMUSP00000045284	ENSMUSP00000053145	ENSMUSP00000054856	ENSMUSP00000077744	ENSMUSP00000079944	ENSMUSP00000115419	Cox5a	Cox5b	Cox6c	Cox7c	Cyc1	Ndufa4	Uqcr10	Uqcrc2	Uqcrfs1	Uqcrh	Uqcrq
mmu01200	Carbon metabolism	8	118	3.58e-05	ENSMUSP00000019323	ENSMUSP00000022268	ENSMUSP00000022573	ENSMUSP00000034567	ENSMUSP00000060346	ENSMUSP00000084846	ENSMUSP00000106481	ENSMUSP00000120976	Aldoa	Dlat	Dld	Dlst	Esd	Hadha	Mdh2	Pdhb
mmu00020	Citrate cycle (TCA cycle)	5	32	6e-05	ENSMUSP00000019323	ENSMUSP00000022268	ENSMUSP00000034567	ENSMUSP00000060346	ENSMUSP00000106481	Dlat	Dld	Dlst	Mdh2	Pdhb
mmu04721	Synaptic vesicle cycle	5	62	0.001	ENSMUSP00000005509	ENSMUSP00000021273	ENSMUSP00000028727	ENSMUSP00000089051	ENSMUSP00000100912	Snap25	Stx1a	Stxbp1	Syt1	Vamp2
mmu00620	Pyruvate metabolism	4	38	0.0019	ENSMUSP00000019323	ENSMUSP00000022268	ENSMUSP00000034567	ENSMUSP00000106481	Dlat	Dld	Mdh2	Pdhb
mmu00010	Glycolysis / Gluconeogenesis	4	65	0.0115	ENSMUSP00000022268	ENSMUSP00000034567	ENSMUSP00000084846	ENSMUSP00000106481	Aldoa	Dlat	Dld	Pdhb
mmu00051	Fructose and mannose metabolism	3	35	0.018	ENSMUSP00000034856	ENSMUSP00000084846	ENSMUSP00000100045	Akr1b3	Aldoa	Mpi
[truncated: 57 more columns]

## Sheet: enrichment.RCTM
#term ID	term description	observed gene count	background gene count	false discovery rate	matching proteins in your network (IDs)	matching proteins in your network (labels)
MMU-8953854	Metabolism of RNA	37	448	5.53e-25	ENSMUSP00000003521	ENSMUSP00000005923	ENSMUSP00000006496	ENSMUSP00000007814	ENSMUSP00000008812	ENSMUSP00000014913	ENSMUSP00000018430	ENSMUSP00000021412	ENSMUSP00000022803	ENSMUSP00000025511	ENSMUSP00000028083	ENSMUSP00000029082	ENSMUSP00000029722	ENSMUSP00000030642	ENSMUSP00000032998	ENSMUSP00000033008	ENSMUSP00000034369	ENSMUSP00000034848	ENSMUSP00000047678	ENSMUSP00000051657	ENSMUSP00000054490	ENSMUSP00000058432	ENSMUSP00000069004	ENSMUSP00000071054	ENSMUSP00000076447	ENSMUSP00000079180	ENSMUSP00000088057	ENSMUSP00000099436	ENSMUSP00000103940	ENSMUSP00000110013	ENSMUSP00000110532	ENSMUSP00000119975	ENSMUSP00000120528	ENSMUSP00000125548	ENSMUSP00000126294	ENSMUSP00000127774	ENSMUSP00000129767	Eif4b	Eif4g1	Khsrp	Psma1	Psma2	Psma3	Psma4	Psma5
MMU-72702	Ribosomal scanning and start codon recognition	19	46	9.76e-24	ENSMUSP00000003521	ENSMUSP00000006496	ENSMUSP00000008812	ENSMUSP00000025511	ENSMUSP00000029722	ENSMUSP00000032998	ENSMUSP00000047678	ENSMUSP00000054490	ENSMUSP00000058432	ENSMUSP00000069004	ENSMUSP00000076447	ENSMUSP00000079180	ENSMUSP00000103940	ENSMUSP00000110013	ENSMUSP00000110532	ENSMUSP00000119975	ENSMUSP00000120528	ENSMUSP00000126294	ENSMUSP00000127774	Eif4b	Eif4g1	Rps10	Rps11	Rps13	Rps14	Rps15	Rps15a	Rps16	Rps18	Rps20	Rps21	Rps23	Rps25	Rps26-ps1	Rps28	Rps3	Rps3a1	Rps9
MMU-72649	Translation initiation complex formation	19	48	1.26e-23	ENSMUSP00000003521	ENSMUSP00000006496	ENSMUSP00000008812	ENSMUSP00000025511	ENSMUSP00000029722	ENSMUSP00000032998	ENSMUSP00000047678	ENSMUSP00000054490	ENSMUSP00000058432	ENSMUSP00000069004	ENSMUSP00000076447	ENSMUSP00000079180	ENSMUSP00000103940	ENSMUSP00000110013	ENSMUSP00000110532	ENSMUSP00000119975	ENSMUSP00000120528	ENSMUSP00000126294	ENSMUSP00000127774	Eif4b	Eif4g1	Rps10	Rps11	Rps13	Rps14	Rps15	Rps15a	Rps16	Rps18	Rps20	Rps21	Rps23	Rps25	Rps26-ps1	Rps28	Rps3	Rps3a1	Rps9
MMU-156827	L13a-mediated translational silencing of Ceruloplasmin expression	19	50	1.43e-23	ENSMUSP00000003521	ENSMUSP00000006496	ENSMUSP00000008812	ENSMUSP00000025511	ENSMUSP00000029722	ENSMUSP00000032998	ENSMUSP00000047678	ENSMUSP00000054490	ENSMUSP00000058432	ENSMUSP00000069004	ENSMUSP00000076447	ENSMUSP00000079180	ENSMUSP00000103940	ENSMUSP00000110013	ENSMUSP00000110532	ENSMUSP00000119975	ENSMUSP00000120528	ENSMUSP00000126294	ENSMUSP00000127774	Eif4b	Eif4g1	Rps10	Rps11	Rps13	Rps14	Rps15	Rps15a	Rps16	Rps18	Rps20	Rps21	Rps23	Rps25	Rps26-ps1	Rps28	Rps3	Rps3a1	Rps9
MMU-72689	Formation of a pool of free 40S subunits	17	37	2.45e-22	ENSMUSP00000003521	ENSMUSP00000006496	ENSMUSP00000008812	ENSMUSP00000025511	ENSMUSP00000029722	ENSMUSP00000032998	ENSMUSP00000054490	ENSMUSP00000058432	ENSMUSP00000069004	ENSMUSP00000076447	ENSMUSP00000079180	ENSMUSP00000103940	ENSMUSP00000110013	ENSMUSP00000110532	ENSMUSP00000119975	ENSMUSP00000120528	ENSMUSP00000126294	Rps10	Rps11	Rps13	Rps14	Rps15	Rps15a	Rps16	Rps18	Rps20	Rps21	Rps23	Rps25	Rps26-ps1	Rps28	Rps3	Rps3a1	Rps9
MMU-450408	AUF1 (hnRNP D0) binds and destabilizes mRNA	18	52	6.24e-22	ENSMUSP00000005923	ENSMUSP00000014913	ENSMUSP00000018430	ENSMUSP00000021412	ENSMUSP00000022803	ENSMUSP00000028083	ENSMUSP00000029082	ENSMUSP00000030642	ENSMUSP00000033008	ENSMUSP00000034369	ENSMUSP00000034848	ENSMUSP00000047678	ENSMUSP00000051657	ENSMUSP00000071054	ENSMUSP00000088057	ENSMUSP00000099436	ENSMUSP00000125548	ENSMUSP00000129767	Eif4g1	Psma1	Psma2	Psma3	Psma4	Psma5	Psma6	Psma7	Psmb1	Psmb10	Psmb2	Psmb3	Psmb4	Psmb5	Psmb6	Psmb7	Psmc3	Psmd8
MMU-72695	Formation of the ternary complex and subsequently the 43S complex	17	40	6.24e-22	ENSMUSP00000003521	ENSMUSP00000006496	ENSMUSP00000008812	ENSMUSP00000025511	ENSMUSP00000029722	ENSMUSP00000032998	ENSMUSP00000054490	ENSMUSP00000058432	ENSMUSP00000069004	ENSMUSP00000076447	ENSMUSP00000079180	ENSMUSP00000103940	ENSMUSP00000110013	ENSMUSP00000110532	ENSMUSP00000119975	ENSMUSP00000120528	ENSMUSP00000126294	Rps10	Rps11	Rps13	Rps14	Rps15	Rps15a	Rps16	Rps18	Rps20	Rps21	Rps23	Rps25	Rps26-ps1	Rps28	Rps3	Rps3a1	Rps9
MMU-1236978	Cross-presentation of soluble exogenous antigens (endosomes)	17	46	3.63e-21	ENSMUSP00000005923	ENSMUSP00000014913	ENSMUSP00000018430	ENSMUSP00000021412	ENSMUSP00000022803	ENSMUSP00000028083	ENSMUSP00000029082	ENSMUSP00000030642	ENSMUSP00000033008	ENSMUSP00000034369	ENSMUSP00000034848	ENSMUSP00000051657	ENSMUSP00000071054	ENSMUSP00000088057	ENSMUSP00000099436	ENSMUSP00000125548	ENSMUSP00000129767	Psma1	Psma2	Psma3	Psma4	Psma5	Psma6	Psma7	Psmb1	Psmb10	Psmb2	Psmb3	Psmb4	Psmb5	Psmb6	Psmb7	Psmc3	Psmd8
MMU-349425	Autodegradation of the E3 ubiquitin ligase COP1	17	47	3.63e-21	ENSMUSP00000005923	ENSMUSP00000014913	ENSMUSP00000018430	ENSMUSP00000021412	ENSMUSP00000022803	ENSMUSP00000028083	ENSMUSP00000029082	ENSMUSP00000030642	ENSMUSP00000033008	ENSMUSP00000034369	ENSMUSP00000034848	ENSMUSP00000051657	ENSMUSP00000071054	ENSMUSP00000088057	ENSMUSP00000099436	ENSMUSP00000125548	ENSMUSP00000129767	Psma1	Psma2	Psma3	Psma4	Psma5	Psma6	Psma7	Psmb1	Psmb10	Psmb2	Psmb3	Psmb4	Psmb5	Psmb6	Psmb7	Psmc3	Psmd8
MMU-450531	Regulation of mRNA stability by proteins that bind AU-rich elements	19	75	3.63e-21	ENSMUSP00000005923	ENSMUSP00000007814	ENSMUSP00000014913	ENSMUSP00000018430	ENSMUSP00000021412	ENSMUSP00000022803	ENSMUSP00000028083	ENSMUSP00000029082	ENSMUSP00000030642	ENSMUSP00000033008	ENSMUSP00000034369	ENSMUSP00000034848	ENSMUSP00000047678	ENSMUSP00000051657	ENSMUSP00000071054	ENSMUSP00000088057	ENSMUSP00000099436	ENSMUSP00000125548	ENSMUSP00000129767	Eif4g1	Khsrp	Psma1	Psma2	Psma3	Psma4	Psma5	Psma6	Psma7	Psmb1	Psmb10	Psmb2	Psmb3	Psmb4	Psmb5	Psmb6	Psmb7	Psmc3	Psmd8
MMU-69229	Ubiquitin-dependent degradation of Cyclin D1	17	46	3.63e-21	ENSMUSP00000005923	ENSMUSP00000014913	ENSMUSP00000018430	ENSMUSP00000021412	ENSMUSP00000022803	ENSMUSP00000028083	ENSMUSP00000029082	ENSMUSP00000030642	ENSMUSP00000033008	ENSMUSP00000034369	ENSMUSP00000034848	ENSMUSP00000051657	ENSMUSP00000071054	ENSMUSP00000088057	ENSMUSP00000099436	ENSMUSP00000125548	ENSMUSP00000129767	Psma1	Psma2	Psma3	Psma4	Psma5	Psma6	Psma7	Psmb1	Psmb10	Psmb2	Psmb3	Psmb4	Psmb5	Psmb6	Psmb7	Psmc3	Psmd8
MMU-69601	Ubiquitin Mediated Degradation of Phosphorylated Cdc25A	17	47	3.63e-21	ENSMUSP00000005923	ENSMUSP00000014913	ENSMUSP00000018430	ENSMUSP00000021412	ENSMUSP00000022803	ENSMUSP00000028083	ENSMUSP00000029082	ENSMUSP00000030642	ENSMUSP00000033008	ENSMUSP00000034369	ENSMUSP00000034848	ENSMUSP00000051657	ENSMUSP00000071054	ENSMUSP00000088057	ENSMUSP00000099436	ENSMUSP00000125548	ENSMUSP00000129767	Psma1	Psma2	Psma3	Psma4	Psma5	Psma6	Psma7	Psmb1	Psmb10	Psmb2	Psmb3	Psmb4	Psmb5	Psmb6	Psmb7	Psmc3	Psmd8
MMU-8939902	Regulation of RUNX2 expression and activity	17	46	3.63e-21	ENSMUSP00000005923	ENSMUSP00000014913	ENSMUSP00000018430	ENSMUSP00000021412	ENSMUSP00000022803	ENSMUSP00000028083	ENSMUSP00000029082	ENSMUSP00000030642	ENSMUSP00000033008	ENSMUSP00000034369	ENSMUSP00000034848	ENSMUSP00000051657	ENSMUSP00000071054	ENSMUSP00000088057	ENSMUSP00000099436	ENSMUSP00000125548	ENSMUSP00000129767	Psma1	Psma2	Psma3	Psma4	Psma5	Psma6	Psma7	Psmb1	Psmb10	Psmb2	Psmb3	Psmb4	Psmb5	Psmb6	Psmb7	Psmc3	Psmd8
MMU-350562	Regulation of ornithine decarboxylase (ODC)	17	48	3.64e-21	ENSMUSP00000005923	ENSMUSP00000014913	ENSMUSP00000018430	ENSMUSP00000021412	ENSMUSP00000022803	ENSMUSP00000028083	ENSMUSP00000029082	ENSMUSP00000030642	ENSMUSP00000033008	ENSMUSP00000034369	ENSMUSP00000034848	ENSMUSP00000051657	ENSMUSP00000071054	ENSMUSP00000088057	ENSMUSP00000099436	ENSMUSP00000125548	ENSMUSP00000129767	Psma1	Psma2	Psma3	Psma4	Psma5	Psma6	Psma7	Psmb1	Psmb10	Psmb2	Psmb3	Psmb4	Psmb5	Psmb6	Psmb7	Psmc3	Psmd8
MMU-4641257	Degradation of AXIN	17	49	4.64e-21	ENSMUSP00000005923	ENSMUSP00000014913	ENSMUSP00000018430	ENSMUSP00000021412	ENSMUSP00000022803	ENSMUSP00000028083	ENSMUSP00000029082	ENSMUSP00000030642	ENSMUSP00000033008	ENSMUSP00000034369	ENSMUSP00000034848	ENSMUSP00000051657	ENSMUSP00000071054	ENSMUSP00000088057	ENSMUSP00000099436	ENSMUSP00000125548	ENSMUSP00000129767	Psma1	Psma2	Psma3	Psma4	Psma5	Psma6	Psma7	Psmb1	Psmb10	Psmb2	Psmb3	Psmb4	Psmb5	Psmb6	Psmb7	Psmc3	Psmd8
MMU-8941858	Regulation of RUNX3 expression and activity	17	49	4.64e-21	ENSMUSP00000005923	ENSMUSP00000014913	ENSMUSP00000018430	ENSMUSP00000021412	ENSMUSP00000022803	ENSMUSP00000028083	ENSMUSP00000029082	ENSMUSP00000030642	ENSMUSP00000033008	ENSMUSP00000034369	ENSMUSP00000034848	ENSMUSP00000051657	ENSMUSP00000071054	ENSMUSP00000088057	ENSMUSP00000099436	ENSMUSP00000125548	ENSMUSP00000129767	Psma1	Psma2	Psma3	Psma4	Psma5	Psma6	Psma7	Psmb1	Psmb10	Psmb2	Psmb3	Psmb4	Psmb5	Psmb6	Psmb7	Psmc3	Psmd8
MMU-351202	Metabolism of polyamines	19	79	4.9e-21	ENSMUSP00000001304	ENSMUSP00000005923	ENSMUSP00000014913	ENSMUSP00000018430	ENSMUSP00000021412	ENSMUSP00000022803	ENSMUSP00000028083	ENSMUSP00000029082	ENSMUSP00000030642	ENSMUSP00000033008	ENSMUSP00000034369	ENSMUSP00000034848	ENSMUSP00000051657	ENSMUSP00000071054	ENSMUSP00000088057	ENSMUSP00000099436	ENSMUSP00000125548	ENSMUSP00000129704	ENSMUSP00000129767	Ckb	Enoph1	Psma1	Psma2	Psma3	Psma4	Psma5	Psma6	Psma7	Psmb1	Psmb10	Psmb2	Psmb3	Psmb4	Psmb5	Psmb6	Psmb7	Psmc3	Psmd8
MMU-174113	SCF-beta-TrCP mediated degradation of Emi1	17	50	5.41e-21	ENSMUSP00000005923	ENSMUSP00000014913	ENSMUSP00000018430	ENSMUSP00000021412	ENSMUSP00000022803	ENSMUSP00000028083	ENSMUSP00000029082	ENSMUSP00000030642	ENSMUSP00000033008	ENSMUSP00000034369	ENSMUSP00000034848	ENSMUSP00000051657	ENSMUSP00000071054	ENSMUSP00000088057	ENSMUSP00000099436	ENSMUSP00000125548	ENSMUSP00000129767	Psma1	Psma2	Psma3	Psma4	Psma5	Psma6	Psma7	Psmb1	Psmb10	Psmb2	Psmb3	Psmb4	Psmb5	Psmb6	Psmb7	Psmc3	Psmd8
MMU-8854050	FBXL7 down-regulates AURKA during mitotic entry and in early mitosis	17	50	5.41e-21	ENSMUSP00000005923	ENSMUSP00000014913	ENSMUSP00000018430	ENSMUSP00000021412	ENSMUSP00000022803	ENSMUSP00000028083	ENSMUSP00000029082	ENSMUSP00000030642	ENSMUSP00000033008	ENSMUSP00000034369	ENSMUSP00000034848	ENSMUSP00000051657	ENSMUSP00000071054	ENSMUSP00000088057	ENSMUSP00000099436	ENSMUSP00000125548	ENSMUSP00000129767	Psma1	Psma2	Psma3	Psma4	Psma5	Psma6	Psma7	Psmb1	Psmb10	Psmb2	Psmb3	Psmb4	Psmb5	Psmb6	Psmb7	Psmc3	Psmd8
MMU-4641258	Degradation of DVL	17	52	8.4e-21	ENSMUSP00000005923	ENSMUSP00000014913	ENSMUSP00000018430	ENSMUSP00000021412	ENSMUSP00000022803	ENSMUSP00000028083	ENSMUSP00000029082	ENSMUSP00000030642	ENSMUSP00000033008	ENSMUSP00000034369	ENSMUSP00000034848	ENSMUSP00000051657	ENSMUSP00000071054	ENSMUSP00000088057	ENSMUSP00000099436	ENSMUSP00000125548	ENSMUSP00000129767	Psma1	Psma2	Psma3	Psma4	Psma5	Psma6	Psma7	Psmb1	Psmb10	Psmb2	Psmb3	Psmb4	Psmb5	Psmb6	Psmb7	Psmc3	Psmd8
MMU-5610780	Degradation of GLI1 by the proteasome	17	52	8.4e-21	ENSMUSP00000005923	ENSMUSP00000014913	ENSMUSP00000018430	ENSMUSP00000021412	ENSMUSP00000022803	ENSMUSP00000028083	ENSMUSP00000029082	ENSMUSP00000030642	ENSMUSP00000033008	ENSMUSP00000034369	ENSMUSP00000034848	ENSMUSP00000051657	ENSMUSP00000071054	ENSMUSP00000088057	ENSMUSP00000099436	ENSMUSP00000125548	ENSMUSP00000129767	Psma1	Psma2	Psma3	Psma4	Psma5	Psma6	Psma7	Psmb1	Psmb10	Psmb2	Psmb3	Psmb4	Psmb5	Psmb6	Psmb7	Psmc3	Psmd8
MMU-1168372	Downstream signaling events of B Cell Receptor (BCR)	18	67	9.2e-21	ENSMUSP00000005923	ENSMUSP00000014913	ENSMUSP00000018430	ENSMUSP00000021412	ENSMUSP00000022803	ENSMUSP00000028083	ENSMUSP00000029082	ENSMUSP00000030642	ENSMUSP00000033008	ENSMUSP00000034369	ENSMUSP00000034848	ENSMUSP00000051657	ENSMUSP00000071054	ENSMUSP00000088057	ENSMUSP00000099436	ENSMUSP00000105709	ENSMUSP00000125548	ENSMUSP00000129767	Calm1	Psma1	Psma2	Psma3	Psma4	Psma5	Psma6	Psma7	Psmb1	Psmb10	Psmb2	Psmb3	Psmb4	Psmb5	Psmb6	Psmb7	Psmc3	Psmd8
MMU-5607761	Dectin-1 mediated noncanonical NF-kB signaling	17	53	9.93e-21	ENSMUSP00000005923	ENSMUSP00000014913	ENSMUSP00000018430	ENSMUSP00000021412	ENSMUSP00000022803	ENSMUSP00000028083	ENSMUSP00000029082	ENSMUSP00000030642	ENSMUSP00000033008	ENSMUSP00000034369	ENSMUSP00000034848	ENSMUSP00000051657	ENSMUSP00000071054	ENSMUSP00000088057	ENSMUSP00000099436	ENSMUSP00000125548	ENSMUSP00000129767	Psma1	Psma2	Psma3	Psma4	Psma5	Psma6	Psma7	Psmb1	Psmb10	Psmb2	Psmb3	Psmb4	Psmb5	Psmb6	Psmb7	Psmc3	Psmd8
MMU-5676590	NIK-->noncanonical NF-kB signaling	17	53	9.93e-21	ENSMUSP00000005923	ENSMUSP00000014913	ENSMUSP00000018430	ENSMUSP00000021412	ENSMUSP00000022803	ENSMUSP00000028083	ENSMUSP00000029082	ENSMUSP00000030642	ENSMUSP00000033008	ENSMUSP00000034369	ENSMUSP00000034848	ENSMUSP00000051657	ENSMUSP00000071054	ENSMUSP00000088057	ENSMUSP00000099436	ENSMUSP00000125548	ENSMUSP00000129767	Psma1	Psma2	Psma3	Psma4	Psma5	Psma6	Psma7	Psmb1	Psmb10	Psmb2	Psmb3	Psmb4	Psmb5	Psmb6	Psmb7	Psmc3	Psmd8
MMU-68827	CDT1 association with the CDC6:ORC:origin complex	17	53	9.93e-21	ENSMUSP00000005923	ENSMUSP00000014913	ENSMUSP00000018430	ENSMUSP00000021412	ENSMUSP00000022803	ENSMUSP00000028083	ENSMUSP00000029082	ENSMUSP00000030642	ENSMUSP00000033008	ENSMUSP00000034369	ENSMUSP00000034848	ENSMUSP00000051657	ENSMUSP00000071054	ENSMUSP00000088057	ENSMUSP00000099436	ENSMUSP00000125548	ENSMUSP00000129767	Psma1	Psma2	Psma3	Psma4	Psma5	Psma6	Psma7	Psmb1	Psmb10	Psmb2	Psmb3	Psmb4	Psmb5	Psmb6	Psmb7	Psmc3	Psmd8
MMU-8852276	The role of GTSE1 in G2/M progression after G2 checkpoint	18	68	1.02e-20	ENSMUSP00000005923	ENSMUSP00000014913	ENSMUSP00000018430	ENSMUSP00000021412	ENSMUSP00000022803	ENSMUSP00000028083	ENSMUSP00000029082	ENSMUSP00000030642	ENSMUSP00000033008	ENSMUSP00000034369	ENSMUSP00000034848	ENSMUSP00000051033	ENSMUSP00000051657	ENSMUSP00000071054	ENSMUSP00000088057	ENSMUSP00000099436	ENSMUSP00000125548	ENSMUSP00000129767	Psma1	Psma2	Psma3	Psma4	Psma5	Psma6	Psma7	Psmb1	Psmb10	Psmb2	Psmb3	Psmb4	Psmb5	Psmb6	Psmb7	Psmc3	Psmd8	Tuba1c
MMU-5610785	GLI3 is processed to GLI3R by the proteasome	17	54	1.14e-20	ENSMUSP00000005923	ENSMUSP00000014913	ENSMUSP00000018430	ENSMUSP00000021412	ENSMUSP00000022803	ENSMUSP00000028083	ENSMUSP00000029082	ENSMUSP00000030642	ENSMUSP00000033008	ENSMUSP00000034369	ENSMUSP00000034848	ENSMUSP00000051657	ENSMUSP00000071054	ENSMUSP00000088057	ENSMUSP00000099436	ENSMUSP00000125548	ENSMUSP00000129767	Psma1	Psma2	Psma3	Psma4	Psma5	Psma6	Psma7	Psmb1	Psmb10	Psmb2	Psmb3	Psmb4	Psmb5	Psmb6	Psmb7	Psmc3	Psmd8
MMU-187577	SCF(Skp2)-mediated degradation of p27/p21	17	55	1.45e-20	ENSMUSP00000005923	ENSMUSP00000014913	ENSMUSP00000018430	ENSMUSP00000021412	ENSMUSP00000022803	ENSMUSP00000028083	ENSMUSP00000029082	ENSMUSP00000030642	ENSMUSP00000033008	ENSMUSP00000034369	ENSMUSP00000034848	ENSMUSP00000051657	ENSMUSP00000071054	ENSMUSP00000088057	ENSMUSP00000099436	ENSMUSP00000125548	ENSMUSP00000129767	Psma1	Psma2	Psma3	Psma4	Psma5	Psma6	Psma7	Psmb1	Psmb10	Psmb2	Psmb3	Psmb4	Psmb5	Psmb6	Psmb7	Psmc3	Psmd8
MMU-174084	Autodegradation of Cdh1 by Cdh1:APC/C	17	57	2.29e-20	ENSMUSP00000005923	ENSMUSP00000014913	ENSMUSP00000018430	ENSMUSP00000021412	ENSMUSP00000022803	ENSMUSP00000028083	ENSMUSP00000029082	ENSMUSP00000030642	ENSMUSP00000033008	ENSMUSP00000034369	ENSMUSP00000034848	ENSMUSP00000051657	ENSMUSP00000071054	ENSMUSP00000088057	ENSMUSP00000099436	ENSMUSP00000125548	ENSMUSP00000129767	Psma1	Psma2	Psma3	Psma4	Psma5	Psma6	Psma7	Psmb1	Psmb10	Psmb2	Psmb3	Psmb4	Psmb5	Psmb6	Psmb7	Psmc3	Psmd8
MMU-4608870	Asymmetric localization of PCP proteins	17	57	2.29e-20	ENSMUSP00000005923	ENSMUSP00000014913	ENSMUSP00000018430	ENSMUSP00000021412	ENSMUSP00000022803	ENSMUSP00000028083	ENSMUSP00000029082	ENSMUSP00000030642	ENSMUSP00000033008	ENSMUSP00000034369	ENSMUSP00000034848	ENSMUSP00000051657	ENSMUSP00000071054	ENSMUSP00000088057	ENSMUSP00000099436	ENSMUSP00000125548	ENSMUSP00000129767	Psma1	Psma2	Psma3	Psma4	Psma5	Psma6	Psma7	Psmb1	Psmb10	Psmb2	Psmb3	Psmb4	Psmb5	Psmb6	Psmb7	Psmc3	Psmd8
MMU-1169091	Activation of NF-kappaB in B cells	17	58	2.79e-20	ENSMUSP00000005923	ENSMUSP00000014913	ENSMUSP00000018430	ENSMUSP00000021412	ENSMUSP00000022803	ENSMUSP00000028083	ENSMUSP00000029082	ENSMUSP00000030642	ENSMUSP00000033008	ENSMUSP00000034369	ENSMUSP00000034848	ENSMUSP00000051657	ENSMUSP00000071054	ENSMUSP00000088057	ENSMUSP00000099436	ENSMUSP00000125548	ENSMUSP00000129767	Psma1	Psma2	Psma3	Psma4	Psma5	Psma6	Psma7	Psmb1	Psmb10	Psmb2	Psmb3	Psmb4	Psmb5	Psmb6	Psmb7	Psmc3	Psmd8
MMU-5358346	Hedgehog ligand biogenesis	17	58	2.79e-20	ENSMUSP00000005923	ENSMUSP00000014913	ENSMUSP00000018430	ENSMUSP00000021412	ENSMUSP00000022803	ENSMUSP00000028083	ENSMUSP00000029082	ENSMUSP00000030642	ENSMUSP00000033008	ENSMUSP00000034369	ENSMUSP00000034848	ENSMUSP00000051657	ENSMUSP00000071054	ENSMUSP00000088057	ENSMUSP00000099436	ENSMUSP00000125548	ENSMUSP00000129767	Psma1	Psma2	Psma3	Psma4	Psma5	Psma6	Psma7	Psmb1	Psmb10	Psmb2	Psmb3	Psmb4	Psmb5	Psmb6	Psmb7	Psmc3	Psmd8
MMU-1234176	Oxygen-dependent proline hydroxylation of Hypoxia-inducible Factor Alpha	17	60	4.13e-20	ENSMUSP00000005923	ENSMUSP00000014913	ENSMUSP00000018430	ENSMUSP00000021412	ENSMUSP00000022803	ENSMUSP00000028083	ENSMUSP00000029082	ENSMUSP00000030642	ENSMUSP00000033008	ENSMUSP00000034369	ENSMUSP00000034848	ENSMUSP00000051657	ENSMUSP00000071054	ENSMUSP00000088057	ENSMUSP00000099436	ENSMUSP00000125548	ENSMUSP00000129767	Psma1	Psma2	Psma3	Psma4	Psma5	Psma6	Psma7	Psmb1	Psmb10	Psmb2	Psmb3	Psmb4	Psmb5	Psmb6	Psmb7	Psmc3	Psmd8
MMU-174154	APC/C:Cdc20 mediated degradation of Securin	17	61	5.13e-20	ENSMUSP00000005923	ENSMUSP00000014913	ENSMUSP00000018430	ENSMUSP00000021412	ENSMUSP00000022803	ENSMUSP00000028083	ENSMUSP00000029082	ENSMUSP00000030642	ENSMUSP00000033008	ENSMUSP00000034369	ENSMUSP00000034848	ENSMUSP00000051657	ENSMUSP00000071054	ENSMUSP00000088057	ENSMUSP00000099436	ENSMUSP00000125548	ENSMUSP00000129767	Psma1	Psma2	Psma3	Psma4	Psma5	Psma6	Psma7	Psmb1	Psmb10	Psmb2	Psmb3	Psmb4	Psmb5	Psmb6	Psmb7	Psmc3	Psmd8
MMU-5658442	Regulation of RAS by GAPs	17	61	5.13e-20	ENSMUSP00000005923	ENSMUSP00000014913	ENSMUSP00000018430	ENSMUSP00000021412	ENSMUSP00000022803	ENSMUSP00000028083	ENSMUSP00000029082	ENSMUSP00000030642	ENSMUSP00000033008	ENSMUSP00000034369	ENSMUSP00000034848	ENSMUSP00000051657	ENSMUSP00000071054	ENSMUSP00000088057	ENSMUSP00000099436	ENSMUSP00000125548	ENSMUSP00000129767	Psma1	Psma2	Psma3	Psma4	Psma5	Psma6	Psma7	Psmb1	Psmb10	Psmb2	Psmb3	Psmb4	Psmb5	Psmb6	Psmb7	Psmc3	Psmd8
MMU-8939236	RUNX1 regulates transcription of genes involved in differentiation of HSCs	17	62	5.96e-20	ENSMUSP00000005923	ENSMUSP00000014913	ENSMUSP00000018430	ENSMUSP00000021412	ENSMUSP00000022803	ENSMUSP00000028083	ENSMUSP00000029082	ENSMUSP00000030642	ENSMUSP00000033008	ENSMUSP00000034369	ENSMUSP00000034848	ENSMUSP00000051657	ENSMUSP00000071054	ENSMUSP00000088057	ENSMUSP00000099436	ENSMUSP00000125548	ENSMUSP00000129767	Psma1	Psma2	Psma3	Psma4	Psma5	Psma6	Psma7	Psmb1	Psmb10	Psmb2	Psmb3	Psmb4	Psmb5	Psmb6	Psmb7	Psmc3	Psmd8
MMU-68949	Orc1 removal from chromatin	17	64	9.27e-20	ENSMUSP00000005923	ENSMUSP00000014913	ENSMUSP00000018430	ENSMUSP00000021412	ENSMUSP00000022803	ENSMUSP00000028083	ENSMUSP00000029082	ENSMUSP00000030642	ENSMUSP00000033008	ENSMUSP00000034369	ENSMUSP00000034848	ENSMUSP00000051657	ENSMUSP00000071054	ENSMUSP00000088057	ENSMUSP00000099436	ENSMUSP00000125548	ENSMUSP00000129767	Psma1	Psma2	Psma3	Psma4	Psma5	Psma6	Psma7	Psmb1	Psmb10	Psmb2	Psmb3	Psmb4	Psmb5	Psmb6	Psmb7	Psmc3	Psmd8
MMU-8948751	Regulation of PTEN stability and activity	17	64	9.27e-20	ENSMUSP00000005923	ENSMUSP00000014913	ENSMUSP00000018430	ENSMUSP00000021412	ENSMUSP00000022803	ENSMUSP00000028083	ENSMUSP00000029082	ENSMUSP00000030642	ENSMUSP00000033008	ENSMUSP00000034369	ENSMUSP00000034848	ENSMUSP00000051657	ENSMUSP00000071054	ENSMUSP00000088057	ENSMUSP00000099436	ENSMUSP00000125548	ENSMUSP00000129767	Psma1	Psma2	Psma3	Psma4	Psma5	Psma6	Psma7	Psmb1	Psmb10	Psmb2	Psmb3	Psmb4	Psmb5	Psmb6	Psmb7	Psmc3	Psmd8
MMU-174178	APC/C:Cdh1 mediated degradation of Cdc20 and other APC/C:Cdh1 targeted proteins in late mitosis/early G1	17	66	1.32e-19	ENSMUSP00000005923	ENSMUSP00000014913	ENSMUSP00000018430	ENSMUSP00000021412	ENSMUSP00000022803	ENSMUSP00000028083	ENSMUSP00000029082	ENSMUSP00000030642	ENSMUSP00000033008	ENSMUSP00000034369	ENSMUSP00000034848	ENSMUSP00000051657	ENSMUSP00000071054	ENSMUSP00000088057	ENSMUSP00000099436	ENSMUSP00000125548	ENSMUSP00000129767	Psma1	Psma2	Psma3	Psma4	Psma5	Psma6	Psma7	Psmb1	Psmb10	Psmb2	Psmb3	Psmb4	Psmb5	Psmb6	Psmb7	Psmc3	Psmd8
MMU-174184	Cdc20:Phospho-APC/C mediated degradation of Cyclin A	17	66	1.32e-19	ENSMUSP00000005923	ENSMUSP00000014913	ENSMUSP00000018430	ENSMUSP00000021412	ENSMUSP00000022803	ENSMUSP00000028083	ENSMUSP00000029082	ENSMUSP00000030642	ENSMUSP00000033008	ENSMUSP00000034369	ENSMUSP00000034848	ENSMUSP00000051657	ENSMUSP00000071054	ENSMUSP00000088057	ENSMUSP00000099436	ENSMUSP00000125548	ENSMUSP00000129767	Psma1	Psma2	Psma3	Psma4	Psma5	Psma6	Psma7	Psmb1	Psmb10	Psmb2	Psmb3	Psmb4	Psmb5	Psmb6	Psmb7	Psmc3	Psmd8
MMU-69017	CDK-mediated phosphorylation and removal of Cdc6	17	66	1.32e-19	ENSMUSP00000005923	ENSMUSP00000014913	ENSMUSP00000018430	ENSMUSP00000021412	ENSMUSP00000022803	ENSMUSP00000028083	ENSMUSP00000029082	ENSMUSP00000030642	ENSMUSP00000033008	ENSMUSP00000034369	ENSMUSP00000034848	ENSMUSP00000051657	ENSMUSP00000071054	ENSMUSP00000088057	ENSMUSP00000099436	ENSMUSP00000125548	ENSMUSP00000129767	Psma1	Psma2	Psma3	Psma4	Psma5	Psma6	Psma7	Psmb1	Psmb10	Psmb2	Psmb3	Psmb4	Psmb5	Psmb6	Psmb7	Psmc3	Psmd8
MMU-5607764	CLEC7A (Dectin-1) signaling	18	84	1.56e-19	ENSMUSP00000005923	ENSMUSP00000014913	ENSMUSP00000018430	ENSMUSP00000021412	ENSMUSP00000022803	ENSMUSP00000028083	ENSMUSP00000029082	ENSMUSP00000030642	ENSMUSP00000033008	ENSMUSP00000034369	ENSMUSP00000034848	ENSMUSP00000051657	ENSMUSP00000071054	ENSMUSP00000088057	ENSMUSP00000099436	ENSMUSP00000105709	ENSMUSP00000125548	ENSMUSP00000129767	Calm1	Psma1	Psma2	Psma3	Psma4	Psma5	Psma6	Psma7	Psmb1	Psmb10	Psmb2	Psmb3	Psmb4	Psmb5	Psmb6	Psmb7	Psmc3	Psmd8
MMU-5687128	MAPK6/MAPK4 signaling	17	67	1.56e-19	ENSMUSP00000005923	ENSMUSP00000014913	ENSMUSP00000018430	ENSMUSP00000021412	ENSMUSP00000022803	ENSMUSP00000028083	ENSMUSP00000029082	ENSMUSP00000030642	ENSMUSP00000033008	ENSMUSP00000034369	ENSMUSP00000034848	ENSMUSP00000051657	ENSMUSP00000071054	ENSMUSP00000088057	ENSMUSP00000099436	ENSMUSP00000125548	ENSMUSP00000129767	Psma1	Psma2	Psma3	Psma4	Psma5	Psma6	Psma7	Psmb1	Psmb10	Psmb2	Psmb3	Psmb4	Psmb5	Psmb6	Psmb7	Psmc3	Psmd8
MMU-71291	Metabolism of amino acids and derivatives	24	228	1.81e-19	ENSMUSP00000001304	ENSMUSP00000005923	ENSMUSP00000011058	ENSMUSP00000014913	ENSMUSP00000018430	ENSMUSP00000021412	ENSMUSP00000022268	ENSMUSP00000022803	ENSMUSP00000028083	ENSMUSP00000029082	ENSMUSP00000030642	ENSMUSP00000033008	ENSMUSP00000034369	ENSMUSP00000034567	ENSMUSP00000034848	ENSMUSP00000051657	ENSMUSP00000060346	ENSMUSP00000071054	ENSMUSP00000088057	ENSMUSP00000099436	ENSMUSP00000106481	ENSMUSP00000125548	ENSMUSP00000129704	ENSMUSP00000129767	Ckb	Dlat	Dld	Dlst	Enoph1	Pdhb	Pdhx	Psma1	Psma2	Psma3	Psma4	Psma5	Psma6	Psma7	Psmb1	Psmb10	Psmb2	Psmb3	Psmb4	Psmb5	Psmb6
MMU-9020702	Interleukin-1 signaling	18	86	2.11e-19	ENSMUSP00000005923	ENSMUSP00000014913	ENSMUSP00000018430	ENSMUSP00000021412	ENSMUSP00000022803	ENSMUSP00000028083	ENSMUSP00000029082	ENSMUSP00000030642	ENSMUSP00000033008	ENSMUSP00000034369	ENSMUSP00000034848	ENSMUSP00000047968	ENSMUSP00000051657	ENSMUSP00000071054	ENSMUSP00000088057	ENSMUSP00000099436	ENSMUSP00000125548	ENSMUSP00000129767	Psma1	Psma2	Psma3	Psma4	Psma5	Psma6	Psma7	Psmb1	Psmb10	Psmb2	Psmb3	Psmb4	Psmb5	Psmb6	Psmb7	Psmc3	Psmd8	S100b
MMU-195253	Degradation of beta-catenin by the destruction complex	17	72	3.81e-19	ENSMUSP00000005923	ENSMUSP00000014913	ENSMUSP00000018430	ENSMUSP00000021412	ENSMUSP00000022803	ENSMUSP00000028083	ENSMUSP00000029082	ENSMUSP00000030642	ENSMUSP00000033008	ENSMUSP00000034369	ENSMUSP00000034848	ENSMUSP00000051657	ENSMUSP00000071054	ENSMUSP00000088057	ENSMUSP00000099436	ENSMUSP00000125548	ENSMUSP00000129767	Psma1	Psma2	Psma3	Psma4	Psma5	Psma6	Psma7	Psmb1	Psmb10	Psmb2	Psmb3	Psmb4	Psmb5	Psmb6	Psmb7	Psmc3	Psmd8
MMU-2871837	FCERI mediated NF-kB activation	17	72	3.81e-19	ENSMUSP00000005923	ENSMUSP00000014913	ENSMUSP00000018430	ENSMUSP00000021412	ENSMUSP00000022803	ENSMUSP00000028083	ENSMUSP00000029082	ENSMUSP00000030642	ENSMUSP00000033008	ENSMUSP00000034369	ENSMUSP00000034848	ENSMUSP00000051657	ENSMUSP00000071054	ENSMUSP00000088057	ENSMUSP00000099436	ENSMUSP00000125548	ENSMUSP00000129767	Psma1	Psma2	Psma3	Psma4	Psma5	Psma6	Psma7	Psmb1	Psmb10	Psmb2	Psmb3	Psmb4	Psmb5	Psmb6	Psmb7	Psmc3	Psmd8
MMU-5610787	Hedgehog 'off' state	18	98	1.45e-18	ENSMUSP00000005923	ENSMUSP00000014913	ENSMUSP00000018430	ENSMUSP00000021412	ENSMUSP00000022803	ENSMUSP00000028083	ENSMUSP00000029082	ENSMUSP00000030642	ENSMUSP00000033008	ENSMUSP00000034369	ENSMUSP00000034848	ENSMUSP00000051033	ENSMUSP00000051657	ENSMUSP00000071054	ENSMUSP00000088057	ENSMUSP00000099436	ENSMUSP00000125548	ENSMUSP00000129767	Psma1	Psma2	Psma3	Psma4	Psma5	Psma6	Psma7	Psmb1	Psmb10	Psmb2	Psmb3	Psmb4	Psmb5	Psmb6	Psmb7	Psmc3	Psmd8	Tuba1c
MMU-5689603	UCH proteinases	17	80	1.69e-18	ENSMUSP00000005923	ENSMUSP00000014913	ENSMUSP00000018430	ENSMUSP00000021412	ENSMUSP00000022803	ENSMUSP00000028083	ENSMUSP00000029082	ENSMUSP00000030642	ENSMUSP00000033008	ENSMUSP00000034369	ENSMUSP00000034848	ENSMUSP00000051657	ENSMUSP00000071054	ENSMUSP00000088057	ENSMUSP00000099436	ENSMUSP00000125548	ENSMUSP00000129767	Psma1	Psma2	Psma3	Psma4	Psma5	Psma6	Psma7	Psmb1	Psmb10	Psmb2	Psmb3	Psmb4	Psmb5	Psmb6	Psmb7	Psmc3	Psmd8
MMU-202424	Downstream TCR signaling	17	81	1.95e-18	ENSMUSP00000005923	ENSMUSP00000014913	ENSMUSP00000018430	ENSMUSP00000021412	ENSMUSP00000022803	ENSMUSP00000028083	ENSMUSP00000029082	ENSMUSP00000030642	ENSMUSP00000033008	ENSMUSP00000034369	ENSMUSP00000034848	ENSMUSP00000051657	ENSMUSP00000071054	ENSMUSP00000088057	ENSMUSP00000099436	ENSMUSP00000125548	ENSMUSP00000129767	Psma1	Psma2	Psma3	Psma4	Psma5	Psma6	Psma7	Psmb1	Psmb10	Psmb2	Psmb3	Psmb4	Psmb5	Psmb6	Psmb7	Psmc3	Psmd8
MMU-5632684	Hedgehog 'on' state	18	105	3.81e-18	ENSMUSP00000005923	ENSMUSP00000014913	ENSMUSP00000018430	ENSMUSP00000021412	ENSMUSP00000022803	ENSMUSP00000028083	ENSMUSP00000029082	ENSMUSP00000030642	ENSMUSP00000033008	ENSMUSP00000034369	ENSMUSP00000034848	ENSMUSP00000051033	ENSMUSP00000051657	ENSMUSP00000071054	ENSMUSP00000088057	ENSMUSP00000099436	ENSMUSP00000125548	ENSMUSP00000129767	Psma1	Psma2	Psma3	Psma4	Psma5	Psma6	Psma7	Psmb1	Psmb10	Psmb2	Psmb3	Psmb4	Psmb5	Psmb6	Psmb7	Psmc3	Psmd8	Tuba1c
MMU-2454202	Fc epsilon receptor (FCERI) signaling	18	107	5.08e-18	ENSMUSP00000005923	ENSMUSP00000014913	ENSMUSP00000018430	ENSMUSP00000021412	ENSMUSP00000022803	ENSMUSP00000028083	ENSMUSP00000029082	ENSMUSP00000030642	ENSMUSP00000033008	ENSMUSP00000034369	ENSMUSP00000034848	ENSMUSP00000051657	ENSMUSP00000071054	ENSMUSP00000088057	ENSMUSP00000099436	ENSMUSP00000105709	ENSMUSP00000125548	ENSMUSP00000129767	Calm1	Psma1	Psma2	Psma3	Psma4	Psma5	Psma6	Psma7	Psmb1	Psmb10	Psmb2	Psmb3	Psmb4	Psmb5	Psmb6	Psmb7	Psmc3	Psmd8
MMU-195721	Signaling by WNT	23	241	6.38e-18	ENSMUSP00000005923	ENSMUSP00000014913	ENSMUSP00000018430	ENSMUSP00000021412	ENSMUSP00000022803	ENSMUSP00000028083	ENSMUSP00000029082	ENSMUSP00000030642	ENSMUSP00000033008	ENSMUSP00000034131	ENSMUSP00000034369	ENSMUSP00000034848	ENSMUSP00000036907	ENSMUSP00000051657	ENSMUSP00000071054	ENSMUSP00000088057	ENSMUSP00000090130	ENSMUSP00000099436	ENSMUSP00000105709	ENSMUSP00000121020	ENSMUSP00000124509	ENSMUSP00000125548	ENSMUSP00000129767	Calm1	H2afz	H3f3a	Psma1	Psma2	Psma3	Psma4	Psma5	Psma6	Psma7	Psmb1	Psmb10	Psmb2	Psmb3	Psmb4	Psmb5	Psmb6	Psmb7	Psmc3	Psmd8	Vps26a	Vps29
MMU-382556	ABC-family proteins mediated transport	17	91	9.74e-18	ENSMUSP00000005923	ENSMUSP00000014913	ENSMUSP00000018430	ENSMUSP00000021412	ENSMUSP00000022803	ENSMUSP00000028083	ENSMUSP00000029082	ENSMUSP00000030642	ENSMUSP00000033008	ENSMUSP00000034369	ENSMUSP00000034848	ENSMUSP00000051657	ENSMUSP00000071054	ENSMUSP00000088057	ENSMUSP00000099436	ENSMUSP00000125548	ENSMUSP00000129767	Psma1	Psma2	Psma3	Psma4	Psma5	Psma6	Psma7	Psmb1	Psmb10	Psmb2	Psmb3	Psmb4	Psmb5	Psmb6	Psmb7	Psmc3	Psmd8
MMU-3858494	Beta-catenin independent WNT signaling	18	116	1.76e-17	ENSMUSP00000005923	ENSMUSP00000014913	ENSMUSP00000018430	ENSMUSP00000021412	ENSMUSP00000022803	ENSMUSP00000028083	ENSMUSP00000029082	ENSMUSP00000030642	ENSMUSP00000033008	ENSMUSP00000034369	ENSMUSP00000034848	ENSMUSP00000051657	ENSMUSP00000071054	ENSMUSP00000088057	ENSMUSP00000099436	ENSMUSP00000105709	ENSMUSP00000125548	ENSMUSP00000129767	Calm1	Psma1	Psma2	Psma3	Psma4	Psma5	Psma6	Psma7	Psmb1	Psmb10	Psmb2	Psmb3	Psmb4	Psmb5	Psmb6	Psmb7	Psmc3	Psmd8
MMU-6791226	Major pathway of rRNA processing in the nucleolus and cytosol	17	102	5.09e-17	ENSMUSP00000003521	ENSMUSP00000006496	ENSMUSP00000008812	ENSMUSP00000025511	ENSMUSP00000029722	ENSMUSP00000032998	ENSMUSP00000054490	ENSMUSP00000058432	ENSMUSP00000069004	ENSMUSP00000076447	ENSMUSP00000079180	ENSMUSP00000103940	ENSMUSP00000110013	ENSMUSP00000110532	ENSMUSP00000119975	ENSMUSP00000120528	ENSMUSP00000126294	Rps10	Rps11	Rps13	Rps14	Rps15	Rps15a	Rps16	Rps18	Rps20	Rps21	Rps23	Rps25	Rps26-ps1	Rps28	Rps3	Rps3a1	Rps9
MMU-8878171	Transcriptional regulation by RUNX1	19	155	9.58e-17	ENSMUSP00000005923	ENSMUSP00000014913	ENSMUSP00000018430	ENSMUSP00000021412	ENSMUSP00000022803	ENSMUSP00000028083	ENSMUSP00000029082	ENSMUSP00000030642	ENSMUSP00000033008	ENSMUSP00000034369	ENSMUSP00000034848	ENSMUSP00000036907	ENSMUSP00000051657	ENSMUSP00000071054	ENSMUSP00000088057	ENSMUSP00000099436	ENSMUSP00000124509	ENSMUSP00000125548	ENSMUSP00000129767	H2afz	H3f3a	Psma1	Psma2	Psma3	Psma4	Psma5	Psma6	Psma7	Psmb1	Psmb10	Psmb2	Psmb3	Psmb4	Psmb5	Psmb6	Psmb7	Psmc3	Psmd8
MMU-201681	TCF dependent signaling in response to WNT	19	166	3e-16	ENSMUSP00000005923	ENSMUSP00000014913	ENSMUSP00000018430	ENSMUSP00000021412	ENSMUSP00000022803	ENSMUSP00000028083	ENSMUSP00000029082	ENSMUSP00000030642	ENSMUSP00000033008	ENSMUSP00000034369	ENSMUSP00000034848	ENSMUSP00000036907	ENSMUSP00000051657	ENSMUSP00000071054	ENSMUSP00000088057	ENSMUSP00000099436	ENSMUSP00000124509	ENSMUSP00000125548	ENSMUSP00000129767	H2afz	H3f3a	Psma1	Psma2	Psma3	Psma4	Psma5	Psma6	Psma7	Psmb1	Psmb10	Psmb2	Psmb3	Psmb4	Psmb5	Psmb6	Psmb7	Psmc3	Psmd8
MMU-69481	G2/M Checkpoints	17	128	1.41e-15	ENSMUSP00000005923	ENSMUSP00000014913	ENSMUSP00000018430	ENSMUSP00000021412	ENSMUSP00000022803	ENSMUSP00000028083	ENSMUSP00000029082	ENSMUSP00000030642	ENSMUSP00000033008	ENSMUSP00000034369	ENSMUSP00000034848	ENSMUSP00000051657	ENSMUSP00000071054	ENSMUSP00000088057	ENSMUSP00000099436	ENSMUSP00000125548	ENSMUSP00000129767	Psma1	Psma2	Psma3	Psma4	Psma5	Psma6	Psma7	Psmb1	Psmb10	Psmb2	Psmb3	Psmb4	Psmb5	Psmb6	Psmb7	Psmc3	Psmd8
MMU-5689880	Ub-specific processing proteases	18	157	1.91e-15	ENSMUSP00000005923	ENSMUSP00000014913	ENSMUSP00000018430	ENSMUSP00000021412	ENSMUSP00000022803	ENSMUSP00000028083	ENSMUSP00000029082	ENSMUSP00000030642	ENSMUSP00000033008	ENSMUSP00000034369	ENSMUSP00000034848	ENSMUSP00000051657	ENSMUSP00000071054	ENSMUSP00000088057	ENSMUSP00000099436	ENSMUSP00000125548	ENSMUSP00000129186	ENSMUSP00000129767	Psma1	Psma2	Psma3	Psma4	Psma5	Psma6	Psma7	Psmb1	Psmb10	Psmb2	Psmb3	Psmb4	Psmb5	Psmb6	Psmb7	Psmc3	Psmd8	Tomm70a
MMU-392499	Metabolism of proteins	44	1497	2.65e-15	ENSMUSP00000003521	ENSMUSP00000005923	ENSMUSP00000006496	ENSMUSP00000008812	ENSMUSP00000014913	ENSMUSP00000018430	ENSMUSP00000021412	ENSMUSP00000022803	ENSMUSP00000025511	ENSMUSP00000028083	ENSMUSP00000029082	ENSMUSP00000029722	ENSMUSP00000030642	ENSMUSP00000031314	ENSMUSP00000032998	ENSMUSP00000033008	ENSMUSP00000034369	ENSMUSP00000034848	ENSMUSP00000034856	ENSMUSP00000047008	ENSMUSP00000047678	ENSMUSP00000051033	ENSMUSP00000051657	ENSMUSP00000054490	ENSMUSP00000058432	ENSMUSP00000069004	ENSMUSP00000071054	ENSMUSP00000076447	ENSMUSP00000077733	ENSMUSP00000079180	ENSMUSP00000088057	ENSMUSP00000099436	ENSMUSP00000099902	ENSMUSP00000103940	ENSMUSP00000105709	ENSMUSP00000110013	ENSMUSP00000110532	ENSMUSP00000119975	ENSMUSP00000120528	ENSMUSP00000125548	ENSMUSP00000126294	ENSMUSP00000127774	ENSMUSP00000129186	ENSMUSP00000129767	Alb
MMU-449147	Signaling by Interleukins	21	262	4.64e-15	ENSMUSP00000005509	ENSMUSP00000005923	ENSMUSP00000014913	ENSMUSP00000018430	ENSMUSP00000021273	ENSMUSP00000021412	ENSMUSP00000022803	ENSMUSP00000028083	ENSMUSP00000028727	ENSMUSP00000029082	ENSMUSP00000030642	ENSMUSP00000033008	ENSMUSP00000034369	ENSMUSP00000034848	ENSMUSP00000047968	ENSMUSP00000051657	ENSMUSP00000071054	ENSMUSP00000088057	ENSMUSP00000099436	ENSMUSP00000125548	ENSMUSP00000129767	Psma1	Psma2	Psma3	Psma4	Psma5	Psma6	Psma7	Psmb1	Psmb10	Psmb2	Psmb3	Psmb4	Psmb5	Psmb6	Psmb7	Psmc3	Psmd8	S100b	Snap25	Stx1a	Vamp2
MMU-2467813	Separation of Sister Chromatids	18	169	5.98e-15	ENSMUSP00000005923	ENSMUSP00000014913	ENSMUSP00000018430	ENSMUSP00000021412	ENSMUSP00000022803	ENSMUSP00000028083	ENSMUSP00000029082	ENSMUSP00000030642	ENSMUSP00000033008	ENSMUSP00000034369	ENSMUSP00000034848	ENSMUSP00000051033	ENSMUSP00000051657	ENSMUSP00000071054	ENSMUSP00000088057	ENSMUSP00000099436	ENSMUSP00000125548	ENSMUSP00000129767	Psma1	Psma2	Psma3	Psma4	Psma5	Psma6	Psma7	Psmb1	Psmb10	Psmb2	Psmb3	Psmb4	Psmb5	Psmb6	Psmb7	Psmc3	Psmd8	Tuba1c
MMU-5673001	RAF/MAP kinase cascade	19	213	1.8e-14	ENSMUSP00000005923	ENSMUSP00000014913	ENSMUSP00000018430	ENSMUSP00000021412	ENSMUSP00000022803	ENSMUSP00000028083	ENSMUSP00000029082	ENSMUSP00000030642	ENSMUSP00000033008	ENSMUSP00000034369	ENSMUSP00000034848	ENSMUSP00000051657	ENSMUSP00000071054	ENSMUSP00000088057	ENSMUSP00000099436	ENSMUSP00000099902	ENSMUSP00000105709	ENSMUSP00000125548	ENSMUSP00000129767	Calm1	Psma1	Psma2	Psma3	Psma4	Psma5	Psma6	Psma7	Psmb1	Psmb10	Psmb2	Psmb3	Psmb4	Psmb5	Psmb6	Psmb7	Psmc3	Psmd8	Sptbn1
MMU-2262752	Cellular responses to stress	22	327	2.59e-14	ENSMUSP00000005923	ENSMUSP00000014913	ENSMUSP00000018430	ENSMUSP00000021412	ENSMUSP00000022803	ENSMUSP00000025486	ENSMUSP00000028083	ENSMUSP00000029082	ENSMUSP00000030642	ENSMUSP00000033008	ENSMUSP00000034369	ENSMUSP00000034848	ENSMUSP00000036907	ENSMUSP00000051033	ENSMUSP00000051657	ENSMUSP00000071054	ENSMUSP00000074392	ENSMUSP00000088057	ENSMUSP00000099436	ENSMUSP00000124509	ENSMUSP00000125548	ENSMUSP00000129767	H2afz	H3f3a	Hsph1	Lmnb1	Psma1	Psma2	Psma3	Psma4	Psma5	Psma6	Psma7	Psmb1	Psmb10	Psmb2	Psmb3	Psmb4	Psmb5	Psmb6	Psmb7	Psmc3	Psmd8	Tuba1c
MMU-8953897	Cellular responses to external stimuli	23	382	5.51e-14	ENSMUSP00000005923	ENSMUSP00000014913	ENSMUSP00000018430	ENSMUSP00000021412	ENSMUSP00000022803	ENSMUSP00000025486	ENSMUSP00000028083	ENSMUSP00000029082	ENSMUSP00000030642	ENSMUSP00000033008	ENSMUSP00000034211	ENSMUSP00000034369	ENSMUSP00000034848	ENSMUSP00000036907	ENSMUSP00000051033	ENSMUSP00000051657	ENSMUSP00000071054	ENSMUSP00000074392	ENSMUSP00000088057	ENSMUSP00000099436	ENSMUSP00000124509	ENSMUSP00000125548	ENSMUSP00000129767	H2afz	H3f3a	Hsph1	Lmnb1	Mt3	Psma1	Psma2	Psma3	Psma4	Psma5	Psma6	Psma7	Psmb1	Psmb10	Psmb2	Psmb3	Psmb4	Psmb5	Psmb6	Psmb7	Psmc3	Psmd8
MMU-1280215	Cytokine Signaling in Immune system	22	357	1.37e-13	ENSMUSP00000005509	ENSMUSP00000005923	ENSMUSP00000014913	ENSMUSP00000018430	ENSMUSP00000021273	ENSMUSP00000021412	ENSMUSP00000022803	ENSMUSP00000028083	ENSMUSP00000028727	ENSMUSP00000029082	ENSMUSP00000030642	ENSMUSP00000033008	ENSMUSP00000034369	ENSMUSP00000034848	ENSMUSP00000047678	ENSMUSP00000047968	ENSMUSP00000051657	ENSMUSP00000071054	ENSMUSP00000088057	ENSMUSP00000099436	ENSMUSP00000125548	ENSMUSP00000129767	Eif4g1	Psma1	Psma2	Psma3	Psma4	Psma5	Psma6	Psma7	Psmb1	Psmb10	Psmb2	Psmb3	Psmb4	Psmb5	Psmb6	Psmb7	Psmc3	Psmd8	S100b	Snap25	Stx1a	Vamp2
MMU-68886	M Phase	21	317	1.42e-13	ENSMUSP00000005923	ENSMUSP00000014913	ENSMUSP00000018430	ENSMUSP00000021412	ENSMUSP00000022803	ENSMUSP00000025486	ENSMUSP00000028083	ENSMUSP00000029082	ENSMUSP00000030642	ENSMUSP00000033008	ENSMUSP00000034369	ENSMUSP00000034848	ENSMUSP00000036907	ENSMUSP00000051033	ENSMUSP00000051657	ENSMUSP00000071054	ENSMUSP00000088057	ENSMUSP00000099436	ENSMUSP00000124509	ENSMUSP00000125548	ENSMUSP00000129767	H2afz	H3f3a	Lmnb1	Psma1	Psma2	Psma3	Psma4	Psma5	Psma6	Psma7	Psmb1	Psmb10	Psmb2	Psmb3	Psmb4	Psmb5	Psmb6	Psmb7	Psmc3	Psmd8	Tuba1c
MMU-9006925	Intracellular signaling by second messengers	18	227	5.96e-13	ENSMUSP00000005923	ENSMUSP00000014913	ENSMUSP00000018430	ENSMUSP00000021412	ENSMUSP00000022803	ENSMUSP00000028083	ENSMUSP00000029082	ENSMUSP00000030642	ENSMUSP00000033008	ENSMUSP00000034369	ENSMUSP00000034848	ENSMUSP00000051657	ENSMUSP00000071054	ENSMUSP00000088057	ENSMUSP00000099436	ENSMUSP00000105709	ENSMUSP00000125548	ENSMUSP00000129767	Calm1	Psma1	Psma2	Psma3	Psma4	Psma5	Psma6	Psma7	Psmb1	Psmb10	Psmb2	Psmb3	Psmb4	Psmb5	Psmb6	Psmb7	Psmc3	Psmd8
MMU-8951664	Neddylation	17	230	8.21e-12	ENSMUSP00000005923	ENSMUSP00000014913	ENSMUSP00000018430	ENSMUSP00000021412	ENSMUSP00000022803	ENSMUSP00000028083	ENSMUSP00000029082	ENSMUSP00000030642	ENSMUSP00000033008	ENSMUSP00000034369	ENSMUSP00000034848	ENSMUSP00000051657	ENSMUSP00000071054	ENSMUSP00000088057	ENSMUSP00000099436	ENSMUSP00000125548	ENSMUSP00000129767	Psma1	Psma2	Psma3	Psma4	Psma5	Psma6	Psma7	Psmb1	Psmb10	Psmb2	Psmb3	Psmb4	Psmb5	Psmb6	Psmb7	Psmc3	Psmd8
MMU-1430728	Metabolism	40	1685	4.94e-11	ENSMUSP00000001304	ENSMUSP00000005923	ENSMUSP00000011058	ENSMUSP00000014913	ENSMUSP00000016396	ENSMUSP00000018430	ENSMUSP00000019323	ENSMUSP00000021412	ENSMUSP00000022268	ENSMUSP00000022573	ENSMUSP00000022803	ENSMUSP00000023608	ENSMUSP00000028083	ENSMUSP00000029082	ENSMUSP00000030642	ENSMUSP00000031314	ENSMUSP00000033008	ENSMUSP00000034369	ENSMUSP00000034567	ENSMUSP00000034848	ENSMUSP00000051222	ENSMUSP00000051657	ENSMUSP00000060346	ENSMUSP00000071054	ENSMUSP00000084846	ENSMUSP00000088057	ENSMUSP00000099436	ENSMUSP00000100045	ENSMUSP00000101006	ENSMUSP00000105709	ENSMUSP00000106481	ENSMUSP00000110434	ENSMUSP00000113022	ENSMUSP00000114705	ENSMUSP00000120976	ENSMUSP00000125504	ENSMUSP00000125548	ENSMUSP00000129704	ENSMUSP00000129767	ENSMUSP00000130898	Akr1b3	Alb	Aldoa	Atp5d	Atp5e
MMU-983168	Antigen processing: Ubiquitination & Proteasome degradation	17	295	3.2e-10	ENSMUSP00000005923	ENSMUSP00000014913	ENSMUSP00000018430	ENSMUSP00000021412	ENSMUSP00000022803	ENSMUSP00000028083	ENSMUSP00000029082	ENSMUSP00000030642	ENSMUSP00000033008	ENSMUSP00000034369	ENSMUSP00000034848	ENSMUSP00000051657	ENSMUSP00000071054	ENSMUSP00000088057	ENSMUSP00000099436	ENSMUSP00000125548	ENSMUSP00000129767	Psma1	Psma2	Psma3	Psma4	Psma5	Psma6	Psma7	Psmb1	Psmb10	Psmb2	Psmb3	Psmb4	Psmb5	Psmb6	Psmb7	Psmc3	Psmd8
MMU-1428517	The citric acid (TCA) cycle and respiratory electron transport	12	129	1.3e-09	ENSMUSP00000011058	ENSMUSP00000016396	ENSMUSP00000019323	ENSMUSP00000022268	ENSMUSP00000023608	ENSMUSP00000034567	ENSMUSP00000051222	ENSMUSP00000060346	ENSMUSP00000101006	ENSMUSP00000106481	ENSMUSP00000113022	ENSMUSP00000125504	Atp5d	Atp5e	Atp5f1	Atp5j	Atp5j2	Atp5k	Dlat	Dld	Dlst	Mdh2	Pdhb	Pdhx
MMU-181429	Serotonin Neurotransmitter Release Cycle	6	16	2.57e-08	ENSMUSP00000005509	ENSMUSP00000009538	ENSMUSP00000021273	ENSMUSP00000028727	ENSMUSP00000089051	ENSMUSP00000100912	Snap25	Stx1a	Stxbp1	Syn2	Syt1	Vamp2
MMU-163210	Formation of ATP by chemiosmotic coupling	6	17	3.43e-08	ENSMUSP00000016396	ENSMUSP00000023608	ENSMUSP00000051222	ENSMUSP00000101006	ENSMUSP00000113022	ENSMUSP00000125504	Atp5d	Atp5e	Atp5f1	Atp5j	Atp5j2	Atp5k
MMU-8949613	Cristae formation	6	17	3.43e-08	ENSMUSP00000016396	ENSMUSP00000023608	ENSMUSP00000051222	ENSMUSP00000101006	ENSMUSP00000113022	ENSMUSP00000125504	Atp5d	Atp5e	Atp5f1	Atp5j	Atp5j2	Atp5k
MMU-212676	Dopamine Neurotransmitter Release Cycle	6	21	9.68e-08	ENSMUSP00000005509	ENSMUSP00000009538	ENSMUSP00000021273	ENSMUSP00000028727	ENSMUSP00000089051	ENSMUSP00000100912	Snap25	Stx1a	Stxbp1	Syn2	Syt1	Vamp2
MMU-382551	Transport of small molecules	20	624	1.08e-07	ENSMUSP00000005923	ENSMUSP00000014913	ENSMUSP00000018430	ENSMUSP00000021412	ENSMUSP00000022803	ENSMUSP00000028083	ENSMUSP00000029082	ENSMUSP00000030642	ENSMUSP00000031314	ENSMUSP00000033008	ENSMUSP00000034369	ENSMUSP00000034848	ENSMUSP00000051657	ENSMUSP00000071054	ENSMUSP00000088057	ENSMUSP00000099436	ENSMUSP00000104906	ENSMUSP00000105709	ENSMUSP00000125548	ENSMUSP00000129767	Alb	Calm1	Psma1	Psma2	Psma3	Psma4	Psma5	Psma6	Psma7	Psmb1	Psmb10	Psmb2	Psmb3	Psmb4	Psmb5	Psmb6	Psmb7	Psmc3	Psmd8	Slc2a13
MMU-1280218	Adaptive Immune System	20	652	2.15e-07	ENSMUSP00000005923	ENSMUSP00000014913	ENSMUSP00000018430	ENSMUSP00000021412	ENSMUSP00000022803	ENSMUSP00000028083	ENSMUSP00000029082	ENSMUSP00000030212	ENSMUSP00000030642	ENSMUSP00000033008	ENSMUSP00000034369	ENSMUSP00000034848	ENSMUSP00000051033	ENSMUSP00000051657	ENSMUSP00000071054	ENSMUSP00000088057	ENSMUSP00000099436	ENSMUSP00000105709	ENSMUSP00000125548	ENSMUSP00000129767	Calm1	Psma1	Psma2	Psma3	Psma4	Psma5	Psma6	Psma7	Psmb1	Psmb10	Psmb2	Psmb3	Psmb4	Psmb5	Psmb6	Psmb7	Psmc3	Psmd8	Sh3gl2	Tuba1c
MMU-264642	Acetylcholine Neurotransmitter Release Cycle	5	13	4.14e-07	ENSMUSP00000005509	ENSMUSP00000021273	ENSMUSP00000028727	ENSMUSP00000089051	ENSMUSP00000100912	Snap25	Stx1a	Stxbp1	Syt1	Vamp2
MMU-181430	Norepinephrine Neurotransmitter Release Cycle	5	16	9.6e-07	ENSMUSP00000005509	ENSMUSP00000021273	ENSMUSP00000028727	ENSMUSP00000089051	ENSMUSP00000100912	Snap25	Stx1a	Stxbp1	Syt1	Vamp2
MMU-888590	GABA synthesis release reuptake and degradation	5	16	9.6e-07	ENSMUSP00000005509	ENSMUSP00000021273	ENSMUSP00000028727	ENSMUSP00000089051	ENSMUSP00000100912	Snap25	Stx1a	Stxbp1	Syt1	Vamp2
MMU-168249	Innate Immune System	22	879	1.33e-06	ENSMUSP00000005923	ENSMUSP00000014913	ENSMUSP00000018430	ENSMUSP00000021412	ENSMUSP00000022803	ENSMUSP00000028083	ENSMUSP00000028727	ENSMUSP00000029082	ENSMUSP00000030642	ENSMUSP00000033008	ENSMUSP00000034369	ENSMUSP00000034848	ENSMUSP00000035743	ENSMUSP00000047968	ENSMUSP00000051657	ENSMUSP00000071054	ENSMUSP00000084846	ENSMUSP00000088057	ENSMUSP00000099436	ENSMUSP00000105709	ENSMUSP00000125548	ENSMUSP00000129767	Aldoa	Calm1	Psma1	Psma2	Psma3	Psma4	Psma5	Psma6	Psma7	Psmb1	Psmb10	Psmb2	Psmb3	Psmb4	Psmb5	Psmb6	Psmb7	Psmc3	Psmd8	Pygb	S100b	Snap25
MMU-210500	Glutamate Neurotransmitter Release Cycle	5	21	2.93e-06	ENSMUSP00000005509	ENSMUSP00000021273	ENSMUSP00000028727	ENSMUSP00000089051	ENSMUSP00000100912	Snap25	Stx1a	Stxbp1	Syt1	Vamp2
MMU-597592	Post-translational protein modification	25	1211	6.34e-06	ENSMUSP00000005923	ENSMUSP00000014913	ENSMUSP00000018430	ENSMUSP00000021412	ENSMUSP00000022803	ENSMUSP00000028083	ENSMUSP00000029082	ENSMUSP00000030642	ENSMUSP00000031314	ENSMUSP00000033008	ENSMUSP00000034369	ENSMUSP00000034848	ENSMUSP00000034856	ENSMUSP00000047008	ENSMUSP00000051033	ENSMUSP00000051657	ENSMUSP00000071054	ENSMUSP00000077733	ENSMUSP00000088057	ENSMUSP00000099436	ENSMUSP00000099902	ENSMUSP00000105709	ENSMUSP00000125548	ENSMUSP00000129186	ENSMUSP00000129767	Alb	Calm1	Dhps	Eif5a	Mpi	Psma1	Psma2	Psma3	Psma4	Psma5	Psma6	Psma7	Psmb1	Psmb10	Psmb2	Psmb3	Psmb4	Psmb5	Psmb6	Psmb7
MMU-71406	Pyruvate metabolism and Citric Acid (TCA) cycle	6	51	9.05e-06	ENSMUSP00000011058	ENSMUSP00000019323	ENSMUSP00000022268	ENSMUSP00000034567	ENSMUSP00000060346	ENSMUSP00000106481	Dlat	Dld	Dlst	Mdh2	Pdhb	Pdhx
MMU-389661	Glyoxylate metabolism and glycine degradation	5	28	9.8e-06	ENSMUSP00000011058	ENSMUSP00000022268	ENSMUSP00000034567	ENSMUSP00000060346	ENSMUSP00000106481	Dlat	Dld	Dlst	Pdhb	Pdhx
MMU-204174	Regulation of pyruvate dehydrogenase (PDH) complex	4	16	3.08e-05	ENSMUSP00000011058	ENSMUSP00000022268	ENSMUSP00000034567	ENSMUSP00000106481	Dlat	Dld	Pdhb	Pdhx
MMU-168256	Immune System	27	1523	3.65e-05	ENSMUSP00000005509	ENSMUSP00000005923	ENSMUSP00000014913	ENSMUSP00000018430	ENSMUSP00000021273	ENSMUSP00000021412	ENSMUSP00000022803	ENSMUSP00000028083	ENSMUSP00000028727	ENSMUSP00000029082	ENSMUSP00000030212	ENSMUSP00000030642	ENSMUSP00000033008	ENSMUSP00000034369	ENSMUSP00000034848	ENSMUSP00000035743	ENSMUSP00000047678	ENSMUSP00000047968	ENSMUSP00000051033	ENSMUSP00000051657	ENSMUSP00000071054	ENSMUSP00000084846	ENSMUSP00000088057	ENSMUSP00000099436	ENSMUSP00000105709	ENSMUSP00000125548	ENSMUSP00000129767	Aldoa	Calm1	Eif4g1	Psma1	Psma2	Psma3	Psma4	Psma5	Psma6	Psma7	Psmb1	Psmb10	Psmb2	Psmb3	Psmb4	Psmb5	Psmb6	Psmb7
MMU-77285	Beta oxidation of myristoyl-CoA to lauroyl-CoA	2	2	0.00081	ENSMUSP00000110434	ENSMUSP00000120976	Hadha	Hadhb
MMU-449836	Other interleukin signaling	3	18	0.0012	ENSMUSP00000005509	ENSMUSP00000021273	ENSMUSP00000028727	Snap25	Stx1a	Vamp2
MMU-112315	Transmission across Chemical Synapses	7	187	0.0013	ENSMUSP00000005509	ENSMUSP00000009538	ENSMUSP00000021273	ENSMUSP00000028727	ENSMUSP00000089051	ENSMUSP00000100912	ENSMUSP00000105709	Calm1	Snap25	Stx1a	Stxbp1	Syn2	Syt1	Vamp2
MMU-77305	Beta oxidation of palmitoyl-CoA to myristoyl-CoA	2	3	0.0013	ENSMUSP00000110434	ENSMUSP00000120976	Hadha	Hadhb
MMU-162582	Signal Transduction	32	2430	0.0014	ENSMUSP00000005923	ENSMUSP00000011058	ENSMUSP00000014913	ENSMUSP00000018430	ENSMUSP00000021412	ENSMUSP00000022268	ENSMUSP00000022803	ENSMUSP00000028083	ENSMUSP00000029082	ENSMUSP00000030212	ENSMUSP00000030642	ENSMUSP00000033008	ENSMUSP00000034131	ENSMUSP00000034369	ENSMUSP00000034567	ENSMUSP00000034848	ENSMUSP00000036907	ENSMUSP00000047678	ENSMUSP00000051033	ENSMUSP00000051657	ENSMUSP00000071054	ENSMUSP00000088057	ENSMUSP00000090130	ENSMUSP00000099436	ENSMUSP00000099902	ENSMUSP00000105709	ENSMUSP00000106481	ENSMUSP00000121020	ENSMUSP00000124509	ENSMUSP00000125548	ENSMUSP00000127774	ENSMUSP00000129767	Calm1	Dlat	Dld	Eif4b	Eif4g1	H2afz	H3f3a	Pdhb	Pdhx	Psma1	Psma2	Psma3	Psma4
MMU-9006931	Signaling by Nuclear Receptors	6	135	0.0014	ENSMUSP00000011058	ENSMUSP00000022268	ENSMUSP00000034567	ENSMUSP00000036907	ENSMUSP00000106481	ENSMUSP00000124509	Dlat	Dld	H2afz	H3f3a	Pdhb	Pdhx
MMU-1852241	Organelle biogenesis and maintenance	7	199	0.0018	ENSMUSP00000016396	ENSMUSP00000023608	ENSMUSP00000051033	ENSMUSP00000051222	ENSMUSP00000101006	ENSMUSP00000113022	ENSMUSP00000125504	Atp5d	Atp5e	Atp5f1	Atp5j	Atp5j2	Atp5k	Tuba1c
MMU-204626	Hypusine synthesis from eIF5A-lysine	2	4	0.0019	ENSMUSP00000047008	ENSMUSP00000077733	Dhps	Eif5a
MMU-71403	Citric acid cycle (TCA cycle)	3	22	0.0019	ENSMUSP00000019323	ENSMUSP00000060346	ENSMUSP00000106481	Dld	Dlst	Mdh2
MMU-77310	Beta oxidation of lauroyl-CoA to decanoyl-CoA-CoA	2	4	0.0019	ENSMUSP00000110434	ENSMUSP00000120976	Hadha	Hadhb
MMU-3238698	WNT ligand biogenesis and trafficking	3	23	0.0021	ENSMUSP00000034131	ENSMUSP00000090130	ENSMUSP00000121020	Vps26a	Vps29	Vps35
MMU-5362517	Signaling by Retinoic Acid	4	56	0.0022	ENSMUSP00000011058	ENSMUSP00000022268	ENSMUSP00000034567	ENSMUSP00000106481	Dlat	Dld	Pdhb	Pdhx
MMU-1482798	Acyl chain remodeling of CL	2	5	0.0026	ENSMUSP00000110434	ENSMUSP00000120976	Hadha	Hadhb
MMU-77348	Beta oxidation of octanoyl-CoA to hexanoyl-CoA	2	5	0.0026	ENSMUSP00000110434	ENSMUSP00000120976	Hadha	Hadhb
MMU-77350	Beta oxidation of hexanoyl-CoA to butanoyl-CoA	2	5	0.0026	ENSMUSP00000110434	ENSMUSP00000120976	Hadha	Hadhb
MMU-77346	Beta oxidation of decanoyl-CoA to octanoyl-CoA-CoA	2	6	0.0034	ENSMUSP00000110434	ENSMUSP00000120976	Hadha	Hadhb
MMU-373760	L1CAM interactions	4	64	0.0035	ENSMUSP00000022629	ENSMUSP00000030212	ENSMUSP00000051033	ENSMUSP00000099902	Dpysl2	Sh3gl2	Sptbn1	Tuba1c
MMU-437239	Recycling pathway of L1	3	33	0.0052	ENSMUSP00000022629	ENSMUSP00000030212	ENSMUSP00000051033	Dpysl2	Sh3gl2	Tuba1c
MMU-77289	Mitochondrial Fatty Acid Beta-Oxidation	3	36	0.0065	ENSMUSP00000110434	ENSMUSP00000114705	ENSMUSP00000120976	Dbi	Hadha	Hadhb
MMU-71064	Lysine catabolism	2	12	0.0104	ENSMUSP00000060346	ENSMUSP00000106481	Dld	Dlst
MMU-5205685	Pink/Parkin Mediated Mitophagy	2	19	0.023	ENSMUSP00000023062	ENSMUSP00000129186	Tomm22	Tomm70a
MMU-166208	mTORC1-mediated signalling	2	21	0.0273	ENSMUSP00000047678	ENSMUSP00000127774	Eif4b	Eif4g1
MMU-427413	NoRC negatively regulates rRNA expression	2	21	0.0273	ENSMUSP00000036907	ENSMUSP00000124509	H2afz	H3f3a
MMU-114608	Platelet degranulation	4	121	0.0287	ENSMUSP00000031314	ENSMUSP00000084846	ENSMUSP00000105709	ENSMUSP00000107795	Alb	Aldoa	Calm1	Tmsb4x
MMU-73728	RNA Polymerase I Promoter Opening	2	22	0.0291	ENSMUSP00000036907	ENSMUSP00000124509	H2afz	H3f3a
MMU-427359	SIRT1 negatively regulates rRNA expression	2	23	0.0313	ENSMUSP00000036907	ENSMUSP00000124509	H2afz	H3f3a
MMU-429947	Deadenylation of mRNA	2	25	0.0357	ENSMUSP00000047678	ENSMUSP00000127774	Eif4b	Eif4g1
MMU-5625886	Activated PKN1 stimulates transcription of AR (androgen receptor) regulated genes KLK2 and KLK3	2	25	0.0357	ENSMUSP00000036907	ENSMUSP00000124509	H2afz	H3f3a
MMU-5626467	RHO GTPases activate IQGAPs	2	25	0.0357	ENSMUSP00000051033	ENSMUSP00000105709	Calm1	Tuba1c
MMU-432720	Lysosome Vesicle Biogenesis	2	28	0.0427	ENSMUSP00000021273	ENSMUSP00000030212	Sh3gl2	Vamp2
[truncated: 43 more columns]

## Sheet: Cellular Component
#term ID	term description	observed gene count	background gene count	false discovery rate	matching proteins in your network (IDs)	matching proteins in your network (labels)
GO:0022626	cytosolic ribosome	52	107	1.17e-71	ENSMUSP00000000756	ENSMUSP00000003521	ENSMUSP00000004072	ENSMUSP00000004554	ENSMUSP00000006496	ENSMUSP00000008812	ENSMUSP00000017548	ENSMUSP00000025511	ENSMUSP00000026420	ENSMUSP00000029722	ENSMUSP00000031617	ENSMUSP00000032998	ENSMUSP00000034966	ENSMUSP00000035105	ENSMUSP00000038352	ENSMUSP00000046506	ENSMUSP00000048469	ENSMUSP00000054490	ENSMUSP00000058432	ENSMUSP00000058919	ENSMUSP00000069004	ENSMUSP00000071616	ENSMUSP00000073175	ENSMUSP00000076447	ENSMUSP00000079180	ENSMUSP00000079340	ENSMUSP00000079628	ENSMUSP00000080354	ENSMUSP00000080523	ENSMUSP00000080854	ENSMUSP00000081474	ENSMUSP00000086614	ENSMUSP00000099435	ENSMUSP00000099757	ENSMUSP00000099878	ENSMUSP00000099909	ENSMUSP00000102213	ENSMUSP00000103365	ENSMUSP00000103940	ENSMUSP00000104067	ENSMUSP00000106014	ENSMUSP00000110013	ENSMUSP00000110532	ENSMUSP00000110731	ENSMUSP00000110886
GO:0044445	cytosolic part	56	228	5.83e-64	ENSMUSP00000000756	ENSMUSP00000003521	ENSMUSP00000004072	ENSMUSP00000004554	ENSMUSP00000006496	ENSMUSP00000008812	ENSMUSP00000017548	ENSMUSP00000025511	ENSMUSP00000026420	ENSMUSP00000028727	ENSMUSP00000029722	ENSMUSP00000030769	ENSMUSP00000031617	ENSMUSP00000032998	ENSMUSP00000034966	ENSMUSP00000035105	ENSMUSP00000038352	ENSMUSP00000046506	ENSMUSP00000048469	ENSMUSP00000054490	ENSMUSP00000058432	ENSMUSP00000058919	ENSMUSP00000069004	ENSMUSP00000071054	ENSMUSP00000071616	ENSMUSP00000073175	ENSMUSP00000076447	ENSMUSP00000079180	ENSMUSP00000079340	ENSMUSP00000079628	ENSMUSP00000080354	ENSMUSP00000080523	ENSMUSP00000080854	ENSMUSP00000081474	ENSMUSP00000086614	ENSMUSP00000099435	ENSMUSP00000099757	ENSMUSP00000099878	ENSMUSP00000099909	ENSMUSP00000102213	ENSMUSP00000103365	ENSMUSP00000103940	ENSMUSP00000104067	ENSMUSP00000106014	ENSMUSP00000110013
GO:0044391	ribosomal subunit	52	181	3.06e-62	ENSMUSP00000000756	ENSMUSP00000003521	ENSMUSP00000004072	ENSMUSP00000004554	ENSMUSP00000006496	ENSMUSP00000008812	ENSMUSP00000017548	ENSMUSP00000025511	ENSMUSP00000026420	ENSMUSP00000029722	ENSMUSP00000031617	ENSMUSP00000032998	ENSMUSP00000034966	ENSMUSP00000035105	ENSMUSP00000038352	ENSMUSP00000046506	ENSMUSP00000048469	ENSMUSP00000054490	ENSMUSP00000058432	ENSMUSP00000058919	ENSMUSP00000069004	ENSMUSP00000071616	ENSMUSP00000073175	ENSMUSP00000076447	ENSMUSP00000079180	ENSMUSP00000079340	ENSMUSP00000079628	ENSMUSP00000080354	ENSMUSP00000080523	ENSMUSP00000080854	ENSMUSP00000081474	ENSMUSP00000086614	ENSMUSP00000099435	ENSMUSP00000099757	ENSMUSP00000099878	ENSMUSP00000099909	ENSMUSP00000102213	ENSMUSP00000103365	ENSMUSP00000103940	ENSMUSP00000104067	ENSMUSP00000106014	ENSMUSP00000110013	ENSMUSP00000110532	ENSMUSP00000110731	ENSMUSP00000110886
GO:0005840	ribosome	54	215	3.14e-62	ENSMUSP00000000756	ENSMUSP00000003521	ENSMUSP00000004072	ENSMUSP00000004554	ENSMUSP00000006496	ENSMUSP00000008812	ENSMUSP00000017548	ENSMUSP00000025511	ENSMUSP00000026420	ENSMUSP00000029722	ENSMUSP00000031617	ENSMUSP00000032998	ENSMUSP00000034211	ENSMUSP00000034966	ENSMUSP00000035105	ENSMUSP00000038135	ENSMUSP00000038352	ENSMUSP00000046506	ENSMUSP00000048469	ENSMUSP00000054490	ENSMUSP00000058432	ENSMUSP00000058919	ENSMUSP00000069004	ENSMUSP00000071616	ENSMUSP00000073175	ENSMUSP00000076447	ENSMUSP00000079180	ENSMUSP00000079340	ENSMUSP00000079628	ENSMUSP00000080354	ENSMUSP00000080523	ENSMUSP00000080854	ENSMUSP00000081474	ENSMUSP00000086614	ENSMUSP00000099435	ENSMUSP00000099757	ENSMUSP00000099878	ENSMUSP00000099909	ENSMUSP00000102213	ENSMUSP00000103365	ENSMUSP00000103940	ENSMUSP00000104067	ENSMUSP00000106014	ENSMUSP00000110013	ENSMUSP00000110532
GO:0032991	protein-containing complex	124	4701	1.83e-50	ENSMUSP00000000090	ENSMUSP00000000756	ENSMUSP00000003521	ENSMUSP00000004072	ENSMUSP00000004554	ENSMUSP00000005509	ENSMUSP00000005923	ENSMUSP00000006496	ENSMUSP00000007814	ENSMUSP00000008812	ENSMUSP00000009538	ENSMUSP00000011058	ENSMUSP00000014913	ENSMUSP00000016396	ENSMUSP00000017548	ENSMUSP00000018430	ENSMUSP00000021273	ENSMUSP00000021412	ENSMUSP00000022268	ENSMUSP00000022629	ENSMUSP00000022803	ENSMUSP00000023062	ENSMUSP00000023210	ENSMUSP00000023608	ENSMUSP00000023677	ENSMUSP00000025511	ENSMUSP00000026420	ENSMUSP00000028083	ENSMUSP00000028727	ENSMUSP00000029082	ENSMUSP00000029722	ENSMUSP00000030642	ENSMUSP00000030769	ENSMUSP00000031314	ENSMUSP00000031617	ENSMUSP00000031637	ENSMUSP00000032998	ENSMUSP00000033008	ENSMUSP00000033176	ENSMUSP00000034131	ENSMUSP00000034211	ENSMUSP00000034369	ENSMUSP00000034470	ENSMUSP00000034567	ENSMUSP00000034848
GO:1990904	ribonucleoprotein complex	63	765	2.19e-46	ENSMUSP00000000756	ENSMUSP00000003521	ENSMUSP00000004072	ENSMUSP00000004554	ENSMUSP00000006496	ENSMUSP00000007814	ENSMUSP00000008812	ENSMUSP00000017548	ENSMUSP00000021412	ENSMUSP00000025511	ENSMUSP00000026420	ENSMUSP00000029722	ENSMUSP00000030769	ENSMUSP00000031617	ENSMUSP00000032998	ENSMUSP00000034211	ENSMUSP00000034848	ENSMUSP00000034966	ENSMUSP00000035105	ENSMUSP00000038135	ENSMUSP00000038352	ENSMUSP00000046506	ENSMUSP00000047678	ENSMUSP00000048469	ENSMUSP00000054490	ENSMUSP00000058432	ENSMUSP00000058919	ENSMUSP00000069004	ENSMUSP00000071054	ENSMUSP00000071616	ENSMUSP00000073175	ENSMUSP00000076447	ENSMUSP00000079180	ENSMUSP00000079340	ENSMUSP00000079628	ENSMUSP00000080354	ENSMUSP00000080523	ENSMUSP00000080854	ENSMUSP00000081474	ENSMUSP00000086614	ENSMUSP00000099435	ENSMUSP00000099757	ENSMUSP00000099878	ENSMUSP00000099909	ENSMUSP00000102213
GO:0044444	cytoplasmic part	137	7673	1.73e-39	ENSMUSP00000000090	ENSMUSP00000000756	ENSMUSP00000001304	ENSMUSP00000003521	ENSMUSP00000004072	ENSMUSP00000004554	ENSMUSP00000005509	ENSMUSP00000005923	ENSMUSP00000006496	ENSMUSP00000007814	ENSMUSP00000008812	ENSMUSP00000009538	ENSMUSP00000011058	ENSMUSP00000014457	ENSMUSP00000014913	ENSMUSP00000016396	ENSMUSP00000017548	ENSMUSP00000018430	ENSMUSP00000019323	ENSMUSP00000021273	ENSMUSP00000021412	ENSMUSP00000022268	ENSMUSP00000022573	ENSMUSP00000022629	ENSMUSP00000022803	ENSMUSP00000023062	ENSMUSP00000023210	ENSMUSP00000023608	ENSMUSP00000023677	ENSMUSP00000025511	ENSMUSP00000025851	ENSMUSP00000026420	ENSMUSP00000028083	ENSMUSP00000028727	ENSMUSP00000029082	ENSMUSP00000029699	ENSMUSP00000029722	ENSMUSP00000030212	ENSMUSP00000030636	ENSMUSP00000030642	ENSMUSP00000030769	ENSMUSP00000031314	ENSMUSP00000031617	ENSMUSP00000031637	ENSMUSP00000032998
GO:0022627	cytosolic small ribosomal subunit	27	41	2.61e-39	ENSMUSP00000003521	ENSMUSP00000004554	ENSMUSP00000006496	ENSMUSP00000008812	ENSMUSP00000025511	ENSMUSP00000026420	ENSMUSP00000029722	ENSMUSP00000032998	ENSMUSP00000035105	ENSMUSP00000038352	ENSMUSP00000054490	ENSMUSP00000058432	ENSMUSP00000069004	ENSMUSP00000076447	ENSMUSP00000079180	ENSMUSP00000079628	ENSMUSP00000099757	ENSMUSP00000099878	ENSMUSP00000099909	ENSMUSP00000103940	ENSMUSP00000104067	ENSMUSP00000110013	ENSMUSP00000110532	ENSMUSP00000119975	ENSMUSP00000120528	ENSMUSP00000125977	ENSMUSP00000126294	Rps10	Rps11	Rps13	Rps14	Rps15	Rps15a	Rps16	Rps17	Rps18	Rps19	Rps20	Rps21	Rps23	Rps24	Rps25	Rps26	Rps26-ps1	Rps27a
GO:0005829	cytosol	96	3326	4.04e-37	ENSMUSP00000000756	ENSMUSP00000001304	ENSMUSP00000003521	ENSMUSP00000004072	ENSMUSP00000004554	ENSMUSP00000005923	ENSMUSP00000006496	ENSMUSP00000007814	ENSMUSP00000008812	ENSMUSP00000014913	ENSMUSP00000017548	ENSMUSP00000018430	ENSMUSP00000021412	ENSMUSP00000022629	ENSMUSP00000022803	ENSMUSP00000025511	ENSMUSP00000025851	ENSMUSP00000026420	ENSMUSP00000028083	ENSMUSP00000028727	ENSMUSP00000029082	ENSMUSP00000029722	ENSMUSP00000030212	ENSMUSP00000030636	ENSMUSP00000030642	ENSMUSP00000030769	ENSMUSP00000031617	ENSMUSP00000032998	ENSMUSP00000033008	ENSMUSP00000034131	ENSMUSP00000034211	ENSMUSP00000034369	ENSMUSP00000034470	ENSMUSP00000034848	ENSMUSP00000034966	ENSMUSP00000035105	ENSMUSP00000038352	ENSMUSP00000046506	ENSMUSP00000047678	ENSMUSP00000048469	ENSMUSP00000051657	ENSMUSP00000052912	ENSMUSP00000054490	ENSMUSP00000058432	ENSMUSP00000058919
GO:0044446	intracellular organelle part	131	7416	2.62e-35	ENSMUSP00000000090	ENSMUSP00000000756	ENSMUSP00000003521	ENSMUSP00000004072	ENSMUSP00000004554	ENSMUSP00000005509	ENSMUSP00000005923	ENSMUSP00000006496	ENSMUSP00000007814	ENSMUSP00000008812	ENSMUSP00000009538	ENSMUSP00000011058	ENSMUSP00000014457	ENSMUSP00000014913	ENSMUSP00000016396	ENSMUSP00000017548	ENSMUSP00000018430	ENSMUSP00000019323	ENSMUSP00000021273	ENSMUSP00000021412	ENSMUSP00000022268	ENSMUSP00000022803	ENSMUSP00000023062	ENSMUSP00000023210	ENSMUSP00000023608	ENSMUSP00000023677	ENSMUSP00000023712	ENSMUSP00000025486	ENSMUSP00000025511	ENSMUSP00000025851	ENSMUSP00000026420	ENSMUSP00000028083	ENSMUSP00000028727	ENSMUSP00000029082	ENSMUSP00000029699	ENSMUSP00000029722	ENSMUSP00000030636	ENSMUSP00000030642	ENSMUSP00000030769	ENSMUSP00000031617	ENSMUSP00000031637	ENSMUSP00000031862	ENSMUSP00000032998	ENSMUSP00000033008	ENSMUSP00000033176
GO:0005737	cytoplasm	145	9909	4e-34	ENSMUSP00000000090	ENSMUSP00000000756	ENSMUSP00000001304	ENSMUSP00000003521	ENSMUSP00000004072	ENSMUSP00000004554	ENSMUSP00000005509	ENSMUSP00000005923	ENSMUSP00000006496	ENSMUSP00000007814	ENSMUSP00000008812	ENSMUSP00000009538	ENSMUSP00000011058	ENSMUSP00000014457	ENSMUSP00000014913	ENSMUSP00000016396	ENSMUSP00000017548	ENSMUSP00000018430	ENSMUSP00000019323	ENSMUSP00000021273	ENSMUSP00000021412	ENSMUSP00000022268	ENSMUSP00000022573	ENSMUSP00000022629	ENSMUSP00000022803	ENSMUSP00000023062	ENSMUSP00000023210	ENSMUSP00000023608	ENSMUSP00000023677	ENSMUSP00000025486	ENSMUSP00000025511	ENSMUSP00000025851	ENSMUSP00000026420	ENSMUSP00000028083	ENSMUSP00000028727	ENSMUSP00000029082	ENSMUSP00000029699	ENSMUSP00000029722	ENSMUSP00000030212	ENSMUSP00000030636	ENSMUSP00000030642	ENSMUSP00000030769	ENSMUSP00000031314	ENSMUSP00000031617	ENSMUSP00000031637
GO:0022625	cytosolic large ribosomal subunit	25	59	8.5e-33	ENSMUSP00000000756	ENSMUSP00000004072	ENSMUSP00000017548	ENSMUSP00000031617	ENSMUSP00000034966	ENSMUSP00000046506	ENSMUSP00000048469	ENSMUSP00000058919	ENSMUSP00000071616	ENSMUSP00000073175	ENSMUSP00000079340	ENSMUSP00000080354	ENSMUSP00000080523	ENSMUSP00000080854	ENSMUSP00000081474	ENSMUSP00000086614	ENSMUSP00000099435	ENSMUSP00000102213	ENSMUSP00000103365	ENSMUSP00000106014	ENSMUSP00000110731	ENSMUSP00000110886	ENSMUSP00000118787	ENSMUSP00000131489	ENSMUSP00000137631	Rpl10a	Rpl13	Rpl14	Rpl18	Rpl19	Rpl22	Rpl23	Rpl26	Rpl3	Rpl30	Rpl31	Rpl32	Rpl34	Rpl35a	Rpl36	Rpl37	Rpl37a	Rpl38	Rpl39	Rpl4
GO:0043229	intracellular organelle	145	10645	4.34e-30	ENSMUSP00000000090	ENSMUSP00000000756	ENSMUSP00000001304	ENSMUSP00000003521	ENSMUSP00000004072	ENSMUSP00000004554	ENSMUSP00000005509	ENSMUSP00000005923	ENSMUSP00000006496	ENSMUSP00000007814	ENSMUSP00000008812	ENSMUSP00000009538	ENSMUSP00000011058	ENSMUSP00000014457	ENSMUSP00000014913	ENSMUSP00000016396	ENSMUSP00000017548	ENSMUSP00000018430	ENSMUSP00000019323	ENSMUSP00000021273	ENSMUSP00000021412	ENSMUSP00000022268	ENSMUSP00000022573	ENSMUSP00000022629	ENSMUSP00000022803	ENSMUSP00000023062	ENSMUSP00000023210	ENSMUSP00000023608	ENSMUSP00000023677	ENSMUSP00000023712	ENSMUSP00000025486	ENSMUSP00000025511	ENSMUSP00000025851	ENSMUSP00000026420	ENSMUSP00000028083	ENSMUSP00000028727	ENSMUSP00000029082	ENSMUSP00000029699	ENSMUSP00000029722	ENSMUSP00000030212	ENSMUSP00000030636	ENSMUSP00000030642	ENSMUSP00000030769	ENSMUSP00000031314	ENSMUSP00000031617
GO:0005844	polysome	24	71	1.46e-29	ENSMUSP00000004072	ENSMUSP00000017548	ENSMUSP00000021412	ENSMUSP00000026420	ENSMUSP00000031617	ENSMUSP00000032998	ENSMUSP00000038135	ENSMUSP00000038352	ENSMUSP00000047678	ENSMUSP00000048469	ENSMUSP00000054490	ENSMUSP00000058432	ENSMUSP00000071616	ENSMUSP00000076447	ENSMUSP00000079180	ENSMUSP00000080523	ENSMUSP00000099878	ENSMUSP00000102213	ENSMUSP00000103365	ENSMUSP00000106014	ENSMUSP00000110013	ENSMUSP00000110886	ENSMUSP00000127774	ENSMUSP00000137631	Dhx9	Eif4b	Eif4g1	Psma6	Rpl10a	Rpl18	Rpl19	Rpl30	Rpl31	Rpl32	Rpl38	Rpl39	Rpl6	Rpl7	Rpl8	Rps21	Rps23	Rps25	Rps26	Rps26-ps1	Rps28
GO:0044424	intracellular part	151	12219	9.88e-29	ENSMUSP00000000090	ENSMUSP00000000756	ENSMUSP00000001304	ENSMUSP00000003521	ENSMUSP00000004072	ENSMUSP00000004554	ENSMUSP00000005509	ENSMUSP00000005923	ENSMUSP00000006496	ENSMUSP00000007814	ENSMUSP00000008812	ENSMUSP00000009538	ENSMUSP00000011058	ENSMUSP00000014457	ENSMUSP00000014913	ENSMUSP00000016396	ENSMUSP00000017548	ENSMUSP00000018430	ENSMUSP00000019323	ENSMUSP00000021273	ENSMUSP00000021412	ENSMUSP00000022268	ENSMUSP00000022573	ENSMUSP00000022629	ENSMUSP00000022803	ENSMUSP00000023062	ENSMUSP00000023210	ENSMUSP00000023608	ENSMUSP00000023677	ENSMUSP00000023712	ENSMUSP00000025486	ENSMUSP00000025511	ENSMUSP00000025851	ENSMUSP00000026420	ENSMUSP00000028083	ENSMUSP00000028727	ENSMUSP00000029082	ENSMUSP00000029699	ENSMUSP00000029722	ENSMUSP00000030212	ENSMUSP00000030636	ENSMUSP00000030642	ENSMUSP00000030769	ENSMUSP00000031314	ENSMUSP00000031617
GO:0005839	proteasome core complex	16	20	2.41e-24	ENSMUSP00000005923	ENSMUSP00000014913	ENSMUSP00000018430	ENSMUSP00000021412	ENSMUSP00000022803	ENSMUSP00000028083	ENSMUSP00000029082	ENSMUSP00000030642	ENSMUSP00000033008	ENSMUSP00000034369	ENSMUSP00000034848	ENSMUSP00000088057	ENSMUSP00000099436	ENSMUSP00000125548	ENSMUSP00000129767	ENSMUSP00000133499	Psma1	Psma2	Psma3	Psma4	Psma5	Psma6	Psma7	Psmb1	Psmb10	Psmb2	Psmb3	Psmb4	Psmb5	Psmb6	Psmb7	Psmb9
GO:0042788	polysomal ribosome	17	30	5.2e-24	ENSMUSP00000004072	ENSMUSP00000017548	ENSMUSP00000026420	ENSMUSP00000031617	ENSMUSP00000038135	ENSMUSP00000038352	ENSMUSP00000048469	ENSMUSP00000054490	ENSMUSP00000058432	ENSMUSP00000076447	ENSMUSP00000080523	ENSMUSP00000102213	ENSMUSP00000103365	ENSMUSP00000106014	ENSMUSP00000110013	ENSMUSP00000110886	ENSMUSP00000137631	Dhx9	Rpl10a	Rpl18	Rpl19	Rpl30	Rpl31	Rpl32	Rpl38	Rpl39	Rpl6	Rpl8	Rps21	Rps23	Rps26	Rps26-ps1	Rps28	Rps29
GO:0043232	intracellular non-membrane-bounded organelle	85	3809	7.72e-24	ENSMUSP00000000756	ENSMUSP00000003521	ENSMUSP00000004072	ENSMUSP00000004554	ENSMUSP00000005509	ENSMUSP00000006496	ENSMUSP00000007814	ENSMUSP00000008812	ENSMUSP00000017548	ENSMUSP00000021412	ENSMUSP00000022629	ENSMUSP00000022803	ENSMUSP00000023712	ENSMUSP00000025486	ENSMUSP00000025511	ENSMUSP00000026420	ENSMUSP00000028727	ENSMUSP00000029699	ENSMUSP00000029722	ENSMUSP00000030636	ENSMUSP00000030769	ENSMUSP00000031617	ENSMUSP00000031862	ENSMUSP00000032998	ENSMUSP00000033008	ENSMUSP00000034211	ENSMUSP00000034848	ENSMUSP00000034966	ENSMUSP00000035105	ENSMUSP00000036907	ENSMUSP00000038135	ENSMUSP00000038352	ENSMUSP00000038781	ENSMUSP00000039633	ENSMUSP00000046506	ENSMUSP00000048469	ENSMUSP00000051033	ENSMUSP00000054490	ENSMUSP00000058432	ENSMUSP00000058919	ENSMUSP00000069004	ENSMUSP00000071054	ENSMUSP00000071616	ENSMUSP00000073175	ENSMUSP00000076447
GO:0000502	proteasome complex	20	67	8.01e-24	ENSMUSP00000005923	ENSMUSP00000014913	ENSMUSP00000018430	ENSMUSP00000021412	ENSMUSP00000022803	ENSMUSP00000028083	ENSMUSP00000029082	ENSMUSP00000030642	ENSMUSP00000030769	ENSMUSP00000033008	ENSMUSP00000034369	ENSMUSP00000034848	ENSMUSP00000051657	ENSMUSP00000071054	ENSMUSP00000088057	ENSMUSP00000099436	ENSMUSP00000121358	ENSMUSP00000125548	ENSMUSP00000129767	ENSMUSP00000133499	Ide	Psma1	Psma2	Psma3	Psma4	Psma5	Psma6	Psma7	Psmb1	Psmb10	Psmb2	Psmb3	Psmb4	Psmb5	Psmb6	Psmb7	Psmb9	Psmc2	Psmc3	Psmd8
GO:0043209	myelin sheath	21	212	2.97e-16	ENSMUSP00000000090	ENSMUSP00000001304	ENSMUSP00000009538	ENSMUSP00000019323	ENSMUSP00000022629	ENSMUSP00000023677	ENSMUSP00000028727	ENSMUSP00000031314	ENSMUSP00000033176	ENSMUSP00000034567	ENSMUSP00000045284	ENSMUSP00000060346	ENSMUSP00000079944	ENSMUSP00000084846	ENSMUSP00000089051	ENSMUSP00000099909	ENSMUSP00000100045	ENSMUSP00000105709	ENSMUSP00000106481	ENSMUSP00000113022	ENSMUSP00000130668	Akr1b3	Alb	Aldoa	Atp5f1	Atp5o	Calm1	Ckb	Cox5a	Cox5b	Dlat	Dld	Dlst	Dpysl2	Mdh2	Ncam1	Rps27a	Snap25	Stxbp1	Syn2	Uqcrc2	Uqcrfs1
GO:0098798	mitochondrial protein complex	22	255	7.08e-16	ENSMUSP00000000090	ENSMUSP00000016396	ENSMUSP00000023062	ENSMUSP00000023210	ENSMUSP00000023608	ENSMUSP00000023677	ENSMUSP00000031637	ENSMUSP00000033176	ENSMUSP00000034567	ENSMUSP00000045284	ENSMUSP00000051222	ENSMUSP00000053145	ENSMUSP00000054856	ENSMUSP00000077744	ENSMUSP00000079944	ENSMUSP00000101006	ENSMUSP00000110434	ENSMUSP00000113022	ENSMUSP00000115419	ENSMUSP00000120976	ENSMUSP00000125504	ENSMUSP00000129186	Atp5d	Atp5e	Atp5f1	Atp5j	Atp5j2	Atp5k	Atp5o	Cox5a	Cox5b	Cox7c	Cyc1	Dlat	Hadha	Hadhb	Ndufa4	Tomm22	Tomm70a	Uqcr10	Uqcrc2	Uqcrfs1	Uqcrh	Uqcrq
GO:0043231	intracellular membrane-bounded organelle	117	9088	9.37e-16	ENSMUSP00000000090	ENSMUSP00000000756	ENSMUSP00000001304	ENSMUSP00000005509	ENSMUSP00000005923	ENSMUSP00000006496	ENSMUSP00000007814	ENSMUSP00000008812	ENSMUSP00000011058	ENSMUSP00000014457	ENSMUSP00000014913	ENSMUSP00000016396	ENSMUSP00000018430	ENSMUSP00000019323	ENSMUSP00000021273	ENSMUSP00000021412	ENSMUSP00000022268	ENSMUSP00000022803	ENSMUSP00000023062	ENSMUSP00000023210	ENSMUSP00000023608	ENSMUSP00000023677	ENSMUSP00000025486	ENSMUSP00000025511	ENSMUSP00000025851	ENSMUSP00000026420	ENSMUSP00000028083	ENSMUSP00000028727	ENSMUSP00000029082	ENSMUSP00000029699	ENSMUSP00000029722	ENSMUSP00000030642	ENSMUSP00000030769	ENSMUSP00000031314	ENSMUSP00000031617	ENSMUSP00000031637	ENSMUSP00000031862	ENSMUSP00000032998	ENSMUSP00000033008	ENSMUSP00000033176	ENSMUSP00000034131	ENSMUSP00000034211	ENSMUSP00000034369	ENSMUSP00000034567	ENSMUSP00000034848
GO:0043227	membrane-bounded organelle	121	9775	2.32e-15	ENSMUSP00000000090	ENSMUSP00000000756	ENSMUSP00000001304	ENSMUSP00000005509	ENSMUSP00000005923	ENSMUSP00000006496	ENSMUSP00000007814	ENSMUSP00000008812	ENSMUSP00000009538	ENSMUSP00000011058	ENSMUSP00000014457	ENSMUSP00000014913	ENSMUSP00000016396	ENSMUSP00000018430	ENSMUSP00000019323	ENSMUSP00000021273	ENSMUSP00000021412	ENSMUSP00000022268	ENSMUSP00000022573	ENSMUSP00000022803	ENSMUSP00000023062	ENSMUSP00000023210	ENSMUSP00000023608	ENSMUSP00000023677	ENSMUSP00000025486	ENSMUSP00000025511	ENSMUSP00000025851	ENSMUSP00000026420	ENSMUSP00000028083	ENSMUSP00000028727	ENSMUSP00000029082	ENSMUSP00000029699	ENSMUSP00000029722	ENSMUSP00000030212	ENSMUSP00000030642	ENSMUSP00000030769	ENSMUSP00000031314	ENSMUSP00000031617	ENSMUSP00000031637	ENSMUSP00000031862	ENSMUSP00000032998	ENSMUSP00000033008	ENSMUSP00000033176	ENSMUSP00000034131	ENSMUSP00000034211
GO:0098800	inner mitochondrial membrane protein complex	17	131	5.66e-15	ENSMUSP00000000090	ENSMUSP00000016396	ENSMUSP00000023210	ENSMUSP00000023608	ENSMUSP00000023677	ENSMUSP00000031637	ENSMUSP00000033176	ENSMUSP00000045284	ENSMUSP00000051222	ENSMUSP00000053145	ENSMUSP00000054856	ENSMUSP00000077744	ENSMUSP00000079944	ENSMUSP00000101006	ENSMUSP00000113022	ENSMUSP00000115419	ENSMUSP00000125504	Atp5d	Atp5e	Atp5f1	Atp5j	Atp5j2	Atp5k	Atp5o	Cox5a	Cox5b	Cox7c	Cyc1	Ndufa4	Uqcr10	Uqcrc2	Uqcrfs1	Uqcrh	Uqcrq
GO:0044455	mitochondrial membrane part	19	212	5.01e-14	ENSMUSP00000000090	ENSMUSP00000016396	ENSMUSP00000023062	ENSMUSP00000023210	ENSMUSP00000023608	ENSMUSP00000023677	ENSMUSP00000031637	ENSMUSP00000033176	ENSMUSP00000045284	ENSMUSP00000051222	ENSMUSP00000053145	ENSMUSP00000054856	ENSMUSP00000077744	ENSMUSP00000079944	ENSMUSP00000101006	ENSMUSP00000113022	ENSMUSP00000115419	ENSMUSP00000125504	ENSMUSP00000129186	Atp5d	Atp5e	Atp5f1	Atp5j	Atp5j2	Atp5k	Atp5o	Cox5a	Cox5b	Cox7c	Cyc1	Ndufa4	Tomm22	Tomm70a	Uqcr10	Uqcrc2	Uqcrfs1	Uqcrh	Uqcrq
GO:0019774	proteasome core complex	beta-subunit complex	9	11	6.4e-14	ENSMUSP00000005923	ENSMUSP00000014913	ENSMUSP00000018430	ENSMUSP00000022803	ENSMUSP00000028083	ENSMUSP00000030642	ENSMUSP00000034369	ENSMUSP00000099436	ENSMUSP00000133499	Psmb1	Psmb10	Psmb2	Psmb3	Psmb4	Psmb5	Psmb6	Psmb7	Psmb9
GO:0044429	mitochondrial part	31	854	1.58e-12	ENSMUSP00000000090	ENSMUSP00000011058	ENSMUSP00000014457	ENSMUSP00000016396	ENSMUSP00000019323	ENSMUSP00000022268	ENSMUSP00000023062	ENSMUSP00000023210	ENSMUSP00000023608	ENSMUSP00000023677	ENSMUSP00000031637	ENSMUSP00000032998	ENSMUSP00000033176	ENSMUSP00000034211	ENSMUSP00000034567	ENSMUSP00000045284	ENSMUSP00000051222	ENSMUSP00000053145	ENSMUSP00000054856	ENSMUSP00000060346	ENSMUSP00000077612	ENSMUSP00000077744	ENSMUSP00000079944	ENSMUSP00000101006	ENSMUSP00000106481	ENSMUSP00000110434	ENSMUSP00000113022	ENSMUSP00000115419	ENSMUSP00000120976	ENSMUSP00000125504	ENSMUSP00000129186	Atp5d	Atp5e	Atp5f1	Atp5j	Atp5j2	Atp5k	Atp5o	C1qbp	Cox5a	Cox5b	Cox6c	Cox7c	Cyc1	Dlat
GO:0070069	cytochrome complex	10	31	2.4e-12	ENSMUSP00000000090	ENSMUSP00000023210	ENSMUSP00000031637	ENSMUSP00000033176	ENSMUSP00000045284	ENSMUSP00000053145	ENSMUSP00000054856	ENSMUSP00000077744	ENSMUSP00000079944	ENSMUSP00000115419	Cox5a	Cox5b	Cox7c	Cyc1	Ndufa4	Uqcr10	Uqcrc2	Uqcrfs1	Uqcrh	Uqcrq
GO:0005743	mitochondrial inner membrane	19	321	4.63e-11	ENSMUSP00000000090	ENSMUSP00000014457	ENSMUSP00000016396	ENSMUSP00000023210	ENSMUSP00000023608	ENSMUSP00000023677	ENSMUSP00000031637	ENSMUSP00000032998	ENSMUSP00000033176	ENSMUSP00000045284	ENSMUSP00000051222	ENSMUSP00000053145	ENSMUSP00000054856	ENSMUSP00000077744	ENSMUSP00000079944	ENSMUSP00000101006	ENSMUSP00000113022	ENSMUSP00000115419	ENSMUSP00000125504	Atp5d	Atp5e	Atp5f1	Atp5j	Atp5j2	Atp5k	Atp5o	Cox5a	Cox5b	Cox6c	Cox7c	Cyc1	Ndufa4	Rps3	Uqcr10	Uqcrc2	Uqcrfs1	Uqcrh	Uqcrq
GO:0019773	proteasome core complex	alpha-subunit complex	7	8	4.79e-11	ENSMUSP00000021412	ENSMUSP00000029082	ENSMUSP00000033008	ENSMUSP00000034848	ENSMUSP00000088057	ENSMUSP00000125548	ENSMUSP00000129767	Psma1	Psma2	Psma3	Psma4	Psma5	Psma6	Psma7
GO:0070013	intracellular organelle lumen	65	3882	4.79e-11	ENSMUSP00000000756	ENSMUSP00000005923	ENSMUSP00000006496	ENSMUSP00000007814	ENSMUSP00000011058	ENSMUSP00000014913	ENSMUSP00000018430	ENSMUSP00000019323	ENSMUSP00000021412	ENSMUSP00000022268	ENSMUSP00000022803	ENSMUSP00000025486	ENSMUSP00000025511	ENSMUSP00000025851	ENSMUSP00000028083	ENSMUSP00000029082	ENSMUSP00000029699	ENSMUSP00000029722	ENSMUSP00000030642	ENSMUSP00000030769	ENSMUSP00000031617	ENSMUSP00000031862	ENSMUSP00000032998	ENSMUSP00000033008	ENSMUSP00000033176	ENSMUSP00000034369	ENSMUSP00000034567	ENSMUSP00000034848	ENSMUSP00000036907	ENSMUSP00000038135	ENSMUSP00000038781	ENSMUSP00000052912	ENSMUSP00000060346	ENSMUSP00000069004	ENSMUSP00000071054	ENSMUSP00000073175	ENSMUSP00000074392	ENSMUSP00000077612	ENSMUSP00000079180	ENSMUSP00000080354	ENSMUSP00000080854	ENSMUSP00000084846	ENSMUSP00000088057	ENSMUSP00000089051	ENSMUSP00000099435
GO:0019866	organelle inner membrane	20	373	5.97e-11	ENSMUSP00000000090	ENSMUSP00000014457	ENSMUSP00000016396	ENSMUSP00000023210	ENSMUSP00000023608	ENSMUSP00000023677	ENSMUSP00000025486	ENSMUSP00000031637	ENSMUSP00000032998	ENSMUSP00000033176	ENSMUSP00000045284	ENSMUSP00000051222	ENSMUSP00000053145	ENSMUSP00000054856	ENSMUSP00000077744	ENSMUSP00000079944	ENSMUSP00000101006	ENSMUSP00000113022	ENSMUSP00000115419	ENSMUSP00000125504	Atp5d	Atp5e	Atp5f1	Atp5j	Atp5j2	Atp5k	Atp5o	Cox5a	Cox5b	Cox6c	Cox7c	Cyc1	Lmnb1	Ndufa4	Rps3	Uqcr10	Uqcrc2	Uqcrfs1	Uqcrh	Uqcrq
GO:0031966	mitochondrial membrane	23	539	1.17e-10	ENSMUSP00000000090	ENSMUSP00000014457	ENSMUSP00000016396	ENSMUSP00000023062	ENSMUSP00000023210	ENSMUSP00000023608	ENSMUSP00000023677	ENSMUSP00000031637	ENSMUSP00000032998	ENSMUSP00000033176	ENSMUSP00000034211	ENSMUSP00000045284	ENSMUSP00000051222	ENSMUSP00000053145	ENSMUSP00000054856	ENSMUSP00000077744	ENSMUSP00000079944	ENSMUSP00000101006	ENSMUSP00000110434	ENSMUSP00000113022	ENSMUSP00000115419	ENSMUSP00000125504	ENSMUSP00000129186	Atp5d	Atp5e	Atp5f1	Atp5j	Atp5j2	Atp5k	Atp5o	Cox5a	Cox5b	Cox6c	Cox7c	Cyc1	Hadhb	Mt3	Ndufa4	Rps3	Tomm22	Tomm70a	Uqcr10	Uqcrc2	Uqcrfs1	Uqcrh
GO:1902494	catalytic complex	33	1266	1.08e-09	ENSMUSP00000005923	ENSMUSP00000011058	ENSMUSP00000014913	ENSMUSP00000018430	ENSMUSP00000021412	ENSMUSP00000022268	ENSMUSP00000022803	ENSMUSP00000023210	ENSMUSP00000028083	ENSMUSP00000029082	ENSMUSP00000030642	ENSMUSP00000030769	ENSMUSP00000033008	ENSMUSP00000033176	ENSMUSP00000034369	ENSMUSP00000034567	ENSMUSP00000034848	ENSMUSP00000038135	ENSMUSP00000045284	ENSMUSP00000051657	ENSMUSP00000053145	ENSMUSP00000054856	ENSMUSP00000060346	ENSMUSP00000071054	ENSMUSP00000077744	ENSMUSP00000088057	ENSMUSP00000099436	ENSMUSP00000106481	ENSMUSP00000110374	ENSMUSP00000121358	ENSMUSP00000125548	ENSMUSP00000129767	ENSMUSP00000133499	Cyc1	Dhx9	Dlat	Dld	Dlst	Ide	Pdhb	Pdhx	Psma1	Psma2	Psma3	Psma4
GO:0031981	nuclear lumen	57	3386	1.43e-09	ENSMUSP00000000756	ENSMUSP00000005923	ENSMUSP00000006496	ENSMUSP00000007814	ENSMUSP00000014913	ENSMUSP00000018430	ENSMUSP00000021412	ENSMUSP00000022268	ENSMUSP00000022803	ENSMUSP00000025486	ENSMUSP00000025511	ENSMUSP00000025851	ENSMUSP00000028083	ENSMUSP00000029082	ENSMUSP00000029699	ENSMUSP00000029722	ENSMUSP00000030642	ENSMUSP00000030769	ENSMUSP00000031617	ENSMUSP00000031862	ENSMUSP00000032998	ENSMUSP00000033008	ENSMUSP00000033176	ENSMUSP00000034369	ENSMUSP00000034848	ENSMUSP00000036907	ENSMUSP00000038135	ENSMUSP00000038781	ENSMUSP00000069004	ENSMUSP00000071054	ENSMUSP00000073175	ENSMUSP00000074392	ENSMUSP00000077612	ENSMUSP00000079180	ENSMUSP00000080354	ENSMUSP00000080854	ENSMUSP00000084846	ENSMUSP00000088057	ENSMUSP00000089051	ENSMUSP00000099435	ENSMUSP00000099436	ENSMUSP00000099878	ENSMUSP00000099902	ENSMUSP00000099909	ENSMUSP00000100045
GO:0098796	membrane protein complex	29	1009	1.87e-09	ENSMUSP00000000090	ENSMUSP00000005509	ENSMUSP00000009538	ENSMUSP00000016396	ENSMUSP00000021273	ENSMUSP00000023062	ENSMUSP00000023210	ENSMUSP00000023608	ENSMUSP00000023677	ENSMUSP00000028727	ENSMUSP00000031637	ENSMUSP00000033176	ENSMUSP00000034131	ENSMUSP00000034470	ENSMUSP00000045284	ENSMUSP00000051222	ENSMUSP00000053145	ENSMUSP00000054856	ENSMUSP00000077744	ENSMUSP00000079944	ENSMUSP00000090130	ENSMUSP00000100912	ENSMUSP00000101006	ENSMUSP00000105709	ENSMUSP00000113022	ENSMUSP00000115419	ENSMUSP00000121020	ENSMUSP00000125504	ENSMUSP00000129186	Atp5d	Atp5e	Atp5f1	Atp5j	Atp5j2	Atp5k	Atp5o	Calm1	Cox5a	Cox5b	Cox7c	Cyc1	Ndufa4	Snap25	Stx1a	Syn2
GO:0005739	mitochondrion	33	1312	2.5e-09	ENSMUSP00000000090	ENSMUSP00000011058	ENSMUSP00000014457	ENSMUSP00000016396	ENSMUSP00000019323	ENSMUSP00000022268	ENSMUSP00000023062	ENSMUSP00000023210	ENSMUSP00000023608	ENSMUSP00000023677	ENSMUSP00000031637	ENSMUSP00000032998	ENSMUSP00000033176	ENSMUSP00000034131	ENSMUSP00000034211	ENSMUSP00000034567	ENSMUSP00000045284	ENSMUSP00000051222	ENSMUSP00000053145	ENSMUSP00000054856	ENSMUSP00000060346	ENSMUSP00000077612	ENSMUSP00000077744	ENSMUSP00000079944	ENSMUSP00000084846	ENSMUSP00000101006	ENSMUSP00000106481	ENSMUSP00000110434	ENSMUSP00000113022	ENSMUSP00000115419	ENSMUSP00000120976	ENSMUSP00000125504	ENSMUSP00000129186	Aldoa	Atp5d	Atp5e	Atp5f1	Atp5j	Atp5j2	Atp5k	Atp5o	C1qbp	Cox5a	Cox5b	Cox6c
GO:1990204	oxidoreductase complex	11	103	4.42e-09	ENSMUSP00000011058	ENSMUSP00000022268	ENSMUSP00000023210	ENSMUSP00000033176	ENSMUSP00000034567	ENSMUSP00000045284	ENSMUSP00000053145	ENSMUSP00000054856	ENSMUSP00000060346	ENSMUSP00000077744	ENSMUSP00000106481	Cyc1	Dlat	Dld	Dlst	Pdhb	Pdhx	Uqcr10	Uqcrc2	Uqcrfs1	Uqcrh	Uqcrq
GO:0098803	respiratory chain complex	10	78	5.32e-09	ENSMUSP00000000090	ENSMUSP00000023210	ENSMUSP00000031637	ENSMUSP00000033176	ENSMUSP00000045284	ENSMUSP00000053145	ENSMUSP00000054856	ENSMUSP00000077744	ENSMUSP00000079944	ENSMUSP00000115419	Cox5a	Cox5b	Cox7c	Cyc1	Ndufa4	Uqcr10	Uqcrc2	Uqcrfs1	Uqcrh	Uqcrq
GO:0005746	mitochondrial respirasome	10	79	5.84e-09	ENSMUSP00000000090	ENSMUSP00000023210	ENSMUSP00000031637	ENSMUSP00000033176	ENSMUSP00000045284	ENSMUSP00000053145	ENSMUSP00000054856	ENSMUSP00000077744	ENSMUSP00000079944	ENSMUSP00000115419	Cox5a	Cox5b	Cox7c	Cyc1	Ndufa4	Uqcr10	Uqcrc2	Uqcrfs1	Uqcrh	Uqcrq
GO:0005753	mitochondrial proton-transporting ATP synthase complex	7	21	6.17e-09	ENSMUSP00000016396	ENSMUSP00000023608	ENSMUSP00000023677	ENSMUSP00000051222	ENSMUSP00000101006	ENSMUSP00000113022	ENSMUSP00000125504	Atp5d	Atp5e	Atp5f1	Atp5j	Atp5j2	Atp5k	Atp5o
GO:0031967	organelle envelope	28	1015	8.56e-09	ENSMUSP00000000090	ENSMUSP00000005509	ENSMUSP00000014457	ENSMUSP00000016396	ENSMUSP00000023062	ENSMUSP00000023210	ENSMUSP00000023608	ENSMUSP00000023677	ENSMUSP00000025486	ENSMUSP00000029699	ENSMUSP00000031637	ENSMUSP00000031862	ENSMUSP00000032998	ENSMUSP00000033176	ENSMUSP00000034211	ENSMUSP00000045284	ENSMUSP00000047008	ENSMUSP00000051222	ENSMUSP00000053145	ENSMUSP00000054856	ENSMUSP00000077744	ENSMUSP00000079944	ENSMUSP00000101006	ENSMUSP00000110434	ENSMUSP00000113022	ENSMUSP00000115419	ENSMUSP00000125504	ENSMUSP00000129186	Atp5d	Atp5e	Atp5f1	Atp5j	Atp5j2	Atp5k	Atp5o	Cbx3	Cox5a	Cox5b	Cox6c	Cox7c	Cyc1	Eif5a	Hadhb	Lmna	Lmnb1
GO:0005750	mitochondrial respiratory chain complex III	6	11	9.32e-09	ENSMUSP00000023210	ENSMUSP00000033176	ENSMUSP00000045284	ENSMUSP00000053145	ENSMUSP00000054856	ENSMUSP00000077744	Cyc1	Uqcr10	Uqcrc2	Uqcrfs1	Uqcrh	Uqcrq
GO:0044428	nuclear part	59	3798	1.1e-08	ENSMUSP00000000756	ENSMUSP00000005509	ENSMUSP00000005923	ENSMUSP00000006496	ENSMUSP00000007814	ENSMUSP00000014913	ENSMUSP00000018430	ENSMUSP00000021412	ENSMUSP00000022268	ENSMUSP00000022803	ENSMUSP00000025486	ENSMUSP00000025511	ENSMUSP00000025851	ENSMUSP00000028083	ENSMUSP00000029082	ENSMUSP00000029699	ENSMUSP00000029722	ENSMUSP00000030642	ENSMUSP00000030769	ENSMUSP00000031617	ENSMUSP00000031862	ENSMUSP00000032998	ENSMUSP00000033008	ENSMUSP00000033176	ENSMUSP00000034369	ENSMUSP00000034848	ENSMUSP00000036907	ENSMUSP00000038135	ENSMUSP00000038781	ENSMUSP00000047008	ENSMUSP00000069004	ENSMUSP00000071054	ENSMUSP00000073175	ENSMUSP00000074392	ENSMUSP00000077612	ENSMUSP00000079180	ENSMUSP00000080354	ENSMUSP00000080854	ENSMUSP00000084846	ENSMUSP00000088057	ENSMUSP00000089051	ENSMUSP00000099435	ENSMUSP00000099436	ENSMUSP00000099878	ENSMUSP00000099902
GO:0005751	mitochondrial respiratory chain complex IV	6	17	6.86e-08	ENSMUSP00000000090	ENSMUSP00000031637	ENSMUSP00000033176	ENSMUSP00000045284	ENSMUSP00000079944	ENSMUSP00000115419	Cox5a	Cox5b	Cox7c	Ndufa4	Uqcrc2	Uqcrfs1
GO:0005791	rough endoplasmic reticulum	10	110	9.29e-08	ENSMUSP00000026420	ENSMUSP00000031617	ENSMUSP00000034211	ENSMUSP00000034966	ENSMUSP00000038352	ENSMUSP00000054490	ENSMUSP00000058432	ENSMUSP00000076447	ENSMUSP00000103365	ENSMUSP00000110013	Mt3	Rpl18	Rpl4	Rpl6	Rps21	Rps23	Rps26	Rps26-ps1	Rps28	Rps29
GO:0005634	nucleus	77	6086	9.9e-08	ENSMUSP00000000756	ENSMUSP00000001304	ENSMUSP00000005509	ENSMUSP00000005923	ENSMUSP00000006496	ENSMUSP00000007814	ENSMUSP00000008812	ENSMUSP00000014913	ENSMUSP00000018430	ENSMUSP00000021412	ENSMUSP00000022268	ENSMUSP00000022803	ENSMUSP00000025486	ENSMUSP00000025511	ENSMUSP00000025851	ENSMUSP00000028083	ENSMUSP00000029082	ENSMUSP00000029699	ENSMUSP00000029722	ENSMUSP00000030642	ENSMUSP00000030769	ENSMUSP00000031617	ENSMUSP00000031862	ENSMUSP00000032998	ENSMUSP00000033008	ENSMUSP00000033176	ENSMUSP00000034211	ENSMUSP00000034369	ENSMUSP00000034848	ENSMUSP00000034966	ENSMUSP00000035105	ENSMUSP00000036907	ENSMUSP00000038135	ENSMUSP00000038781	ENSMUSP00000047008	ENSMUSP00000047678	ENSMUSP00000047968	ENSMUSP00000051033	ENSMUSP00000051657	ENSMUSP00000060346	ENSMUSP00000069004	ENSMUSP00000071054	ENSMUSP00000073175	ENSMUSP00000074392	ENSMUSP00000077612
GO:0000276	mitochondrial proton-transporting ATP synthase complex	coupling factor F(o)	5	12	5.83e-07	ENSMUSP00000023608	ENSMUSP00000023677	ENSMUSP00000051222	ENSMUSP00000113022	ENSMUSP00000125504	Atp5f1	Atp5j	Atp5j2	Atp5k	Atp5o
GO:0045254	pyruvate dehydrogenase complex	4	8	6.69e-06	ENSMUSP00000011058	ENSMUSP00000022268	ENSMUSP00000034567	ENSMUSP00000106481	Dlat	Dld	Pdhb	Pdhx
GO:0098556	cytoplasmic side of rough endoplasmic reticulum membrane	4	8	6.69e-06	ENSMUSP00000026420	ENSMUSP00000038352	ENSMUSP00000076447	ENSMUSP00000110013	Rps26	Rps26-ps1	Rps28	Rps29
GO:0005730	nucleolus	21	878	9.35e-06	ENSMUSP00000000756	ENSMUSP00000006496	ENSMUSP00000025511	ENSMUSP00000029722	ENSMUSP00000031617	ENSMUSP00000032998	ENSMUSP00000038135	ENSMUSP00000038781	ENSMUSP00000073175	ENSMUSP00000077612	ENSMUSP00000079180	ENSMUSP00000080354	ENSMUSP00000080854	ENSMUSP00000099435	ENSMUSP00000099878	ENSMUSP00000099902	ENSMUSP00000103365	ENSMUSP00000104067	ENSMUSP00000110532	ENSMUSP00000126294	ENSMUSP00000137631	C1qbp	Dhx9	Rpl13	Rpl18	Rpl23	Rpl26	Rpl3	Rpl31	Rpl5	Rpl6	Rps10	Rps13	Rps14	Rps19	Rps25	Rps3	Rps3a1	Rps6	Rps9	Sptbn1	Tbca
GO:0030906	retromer	cargo-selective complex	3	3	3.77e-05	ENSMUSP00000034131	ENSMUSP00000090130	ENSMUSP00000121020	Vps26a	Vps29	Vps35
GO:0036464	cytoplasmic ribonucleoprotein granule	9	182	5.01e-05	ENSMUSP00000007814	ENSMUSP00000021412	ENSMUSP00000030769	ENSMUSP00000031617	ENSMUSP00000034848	ENSMUSP00000038135	ENSMUSP00000071054	ENSMUSP00000099878	ENSMUSP00000129767	Dhx9	Khsrp	Psma2	Psma4	Psma6	Psmc2	Psmc3	Rpl6	Rps6
GO:0070032	synaptobrevin 2-SNAP-25-syntaxin-1a-complexin I complex	3	4	6.3e-05	ENSMUSP00000005509	ENSMUSP00000021273	ENSMUSP00000028727	Snap25	Stx1a	Vamp2
GO:0070033	synaptobrevin 2-SNAP-25-syntaxin-1a-complexin II complex	3	4	6.3e-05	ENSMUSP00000005509	ENSMUSP00000021273	ENSMUSP00000028727	Snap25	Stx1a	Vamp2
GO:0070044	synaptobrevin 2-SNAP-25-syntaxin-1a complex	3	5	9.64e-05	ENSMUSP00000005509	ENSMUSP00000021273	ENSMUSP00000028727	Snap25	Stx1a	Vamp2
GO:0030904	retromer complex	4	20	0.00012	ENSMUSP00000034131	ENSMUSP00000034470	ENSMUSP00000090130	ENSMUSP00000121020	Vps26a	Vps26b	Vps29	Vps35
GO:0043195	terminal bouton	7	116	0.00014	ENSMUSP00000009538	ENSMUSP00000021273	ENSMUSP00000022629	ENSMUSP00000028727	ENSMUSP00000073175	ENSMUSP00000089051	ENSMUSP00000100912	Dpysl2	Rpl26	Snap25	Stxbp1	Syn2	Syt1	Vamp2
GO:0031201	SNARE complex	5	46	0.00015	ENSMUSP00000005509	ENSMUSP00000009538	ENSMUSP00000021273	ENSMUSP00000028727	ENSMUSP00000100912	Snap25	Stx1a	Syn2	Syt1	Vamp2
GO:0031672	A band	5	47	0.00016	ENSMUSP00000031617	ENSMUSP00000034966	ENSMUSP00000071616	ENSMUSP00000084846	ENSMUSP00000099902	Aldoa	Rpl4	Rpl6	Rpl7	Sptbn1
GO:0043005	neuron projection	25	1429	0.00017	ENSMUSP00000001304	ENSMUSP00000005509	ENSMUSP00000007814	ENSMUSP00000009538	ENSMUSP00000021273	ENSMUSP00000022629	ENSMUSP00000028727	ENSMUSP00000030212	ENSMUSP00000030636	ENSMUSP00000030769	ENSMUSP00000032998	ENSMUSP00000034131	ENSMUSP00000034211	ENSMUSP00000035743	ENSMUSP00000047008	ENSMUSP00000073175	ENSMUSP00000076564	ENSMUSP00000080427	ENSMUSP00000089051	ENSMUSP00000099878	ENSMUSP00000099902	ENSMUSP00000100912	ENSMUSP00000105709	ENSMUSP00000127774	ENSMUSP00000130668	Calm1	Ckb	Ctnnd2	Dpysl2	Eif4b	Eif5a	Khsrp	Mt3	Ncam1	Psmc2	Pygb	Rnpep	Rpl26	Rps3	Rps6	Sh3gl2	Snap25	Sptbn1	Stmn1	Stx1a
GO:0097458	neuron part	28	1732	0.00021	ENSMUSP00000001304	ENSMUSP00000005509	ENSMUSP00000007814	ENSMUSP00000009538	ENSMUSP00000021273	ENSMUSP00000022629	ENSMUSP00000028727	ENSMUSP00000030212	ENSMUSP00000030636	ENSMUSP00000030769	ENSMUSP00000032998	ENSMUSP00000034131	ENSMUSP00000034211	ENSMUSP00000035105	ENSMUSP00000035743	ENSMUSP00000047008	ENSMUSP00000047968	ENSMUSP00000073175	ENSMUSP00000076564	ENSMUSP00000080427	ENSMUSP00000089051	ENSMUSP00000099878	ENSMUSP00000099902	ENSMUSP00000100912	ENSMUSP00000105709	ENSMUSP00000114705	ENSMUSP00000127774	ENSMUSP00000130668	Calm1	Ckb	Ctnnd2	Dbi	Dpysl2	Eif4b	Eif5a	Khsrp	Mt3	Ncam1	Psmc2	Pygb	Rnpep	Rpl26	Rps3	Rps6	Rpsa
GO:0005654	nucleoplasm	37	2648	0.00024	ENSMUSP00000005923	ENSMUSP00000007814	ENSMUSP00000014913	ENSMUSP00000018430	ENSMUSP00000021412	ENSMUSP00000022268	ENSMUSP00000022803	ENSMUSP00000025486	ENSMUSP00000025851	ENSMUSP00000028083	ENSMUSP00000029082	ENSMUSP00000029699	ENSMUSP00000030642	ENSMUSP00000031862	ENSMUSP00000033008	ENSMUSP00000033176	ENSMUSP00000034369	ENSMUSP00000034848	ENSMUSP00000038135	ENSMUSP00000069004	ENSMUSP00000073175	ENSMUSP00000074392	ENSMUSP00000080854	ENSMUSP00000088057	ENSMUSP00000089051	ENSMUSP00000099435	ENSMUSP00000099436	ENSMUSP00000099909	ENSMUSP00000100045	ENSMUSP00000104067	ENSMUSP00000106481	ENSMUSP00000113022	ENSMUSP00000124509	ENSMUSP00000125548	ENSMUSP00000129767	ENSMUSP00000133499	ENSMUSP00000137631	Akr1b3	Atp5f1	Cbx3	Dhx9	Dld	Dpp3	H3f3a	Hsph1
GO:0031090	organelle membrane	37	2740	0.00048	ENSMUSP00000000090	ENSMUSP00000005509	ENSMUSP00000009538	ENSMUSP00000014457	ENSMUSP00000016396	ENSMUSP00000021273	ENSMUSP00000023062	ENSMUSP00000023210	ENSMUSP00000023608	ENSMUSP00000023677	ENSMUSP00000025486	ENSMUSP00000026420	ENSMUSP00000029699	ENSMUSP00000031637	ENSMUSP00000032998	ENSMUSP00000033176	ENSMUSP00000034131	ENSMUSP00000034211	ENSMUSP00000038352	ENSMUSP00000045284	ENSMUSP00000047008	ENSMUSP00000051222	ENSMUSP00000053145	ENSMUSP00000054856	ENSMUSP00000076447	ENSMUSP00000077744	ENSMUSP00000079944	ENSMUSP00000090130	ENSMUSP00000100912	ENSMUSP00000101006	ENSMUSP00000110013	ENSMUSP00000110434	ENSMUSP00000113022	ENSMUSP00000115419	ENSMUSP00000121020	ENSMUSP00000125504	ENSMUSP00000129186	Atp5d	Atp5e	Atp5f1	Atp5j	Atp5j2	Atp5k	Atp5o	Cox5a
GO:0048787	presynaptic active zone membrane	3	11	0.00054	ENSMUSP00000005509	ENSMUSP00000028727	ENSMUSP00000089051	Snap25	Stx1a	Stxbp1
GO:0031597	cytosolic proteasome complex	3	12	0.00066	ENSMUSP00000030769	ENSMUSP00000071054	ENSMUSP00000121358	Ide	Psmc2	Psmc3
GO:0005759	mitochondrial matrix	10	327	0.00068	ENSMUSP00000011058	ENSMUSP00000019323	ENSMUSP00000022268	ENSMUSP00000032998	ENSMUSP00000034567	ENSMUSP00000060346	ENSMUSP00000077612	ENSMUSP00000106481	ENSMUSP00000110434	ENSMUSP00000120976	C1qbp	Dlat	Dld	Dlst	Hadha	Hadhb	Mdh2	Pdhb	Pdhx	Rps3
GO:0045202	synapse	18	968	0.001	ENSMUSP00000005509	ENSMUSP00000009538	ENSMUSP00000021273	ENSMUSP00000022629	ENSMUSP00000028727	ENSMUSP00000029082	ENSMUSP00000030212	ENSMUSP00000030769	ENSMUSP00000034131	ENSMUSP00000034211	ENSMUSP00000039633	ENSMUSP00000073175	ENSMUSP00000080427	ENSMUSP00000089051	ENSMUSP00000099902	ENSMUSP00000100912	ENSMUSP00000114705	ENSMUSP00000125548	Ctnnd2	Dbi	Dpysl2	Mt3	Psma3	Psma7	Psmc2	Rpl26	Sh3gl2	Snap25	Sptbn1	Stx1a	Stxbp1	Syn2	Syt1	Tln2	Vamp2	Vps35
GO:0000932	P-body	5	74	0.0011	ENSMUSP00000021412	ENSMUSP00000030769	ENSMUSP00000034848	ENSMUSP00000071054	ENSMUSP00000129767	Psma2	Psma4	Psma6	Psmc2	Psmc3
GO:0016507	mitochondrial fatty acid beta-oxidation multienzyme complex	2	2	0.0012	ENSMUSP00000110434	ENSMUSP00000120976	Hadha	Hadhb
GO:0044456	synapse part	16	809	0.0012	ENSMUSP00000005509	ENSMUSP00000009538	ENSMUSP00000021273	ENSMUSP00000022629	ENSMUSP00000028727	ENSMUSP00000029082	ENSMUSP00000030212	ENSMUSP00000030769	ENSMUSP00000034131	ENSMUSP00000034211	ENSMUSP00000073175	ENSMUSP00000080427	ENSMUSP00000089051	ENSMUSP00000099902	ENSMUSP00000100912	ENSMUSP00000114705	Ctnnd2	Dbi	Dpysl2	Mt3	Psma7	Psmc2	Rpl26	Sh3gl2	Snap25	Sptbn1	Stx1a	Stxbp1	Syn2	Syt1	Vamp2	Vps35
GO:0098793	presynapse	11	429	0.0013	ENSMUSP00000005509	ENSMUSP00000009538	ENSMUSP00000021273	ENSMUSP00000022629	ENSMUSP00000028727	ENSMUSP00000030212	ENSMUSP00000034211	ENSMUSP00000073175	ENSMUSP00000089051	ENSMUSP00000100912	ENSMUSP00000114705	Dbi	Dpysl2	Mt3	Rpl26	Sh3gl2	Snap25	Stx1a	Stxbp1	Syn2	Syt1	Vamp2
GO:0120025	plasma membrane bounded cell projection	30	2172	0.0015	ENSMUSP00000001304	ENSMUSP00000005509	ENSMUSP00000007814	ENSMUSP00000009538	ENSMUSP00000021273	ENSMUSP00000022629	ENSMUSP00000028727	ENSMUSP00000030212	ENSMUSP00000030636	ENSMUSP00000030769	ENSMUSP00000032998	ENSMUSP00000034131	ENSMUSP00000034211	ENSMUSP00000035743	ENSMUSP00000039633	ENSMUSP00000047008	ENSMUSP00000047968	ENSMUSP00000073175	ENSMUSP00000076564	ENSMUSP00000080427	ENSMUSP00000084846	ENSMUSP00000089051	ENSMUSP00000099878	ENSMUSP00000099902	ENSMUSP00000100045	ENSMUSP00000100912	ENSMUSP00000105709	ENSMUSP00000106481	ENSMUSP00000127774	ENSMUSP00000130668	Akr1b3	Aldoa	Calm1	Ckb	Ctnnd2	Dld	Dpysl2	Eif4b	Eif5a	Khsrp	Mt3	Ncam1	Psmc2	Pygb	Rnpep
GO:0008021	synaptic vesicle	7	183	0.0017	ENSMUSP00000005509	ENSMUSP00000009538	ENSMUSP00000021273	ENSMUSP00000028727	ENSMUSP00000034211	ENSMUSP00000100912	ENSMUSP00000114705	Dbi	Mt3	Snap25	Stx1a	Syn2	Syt1	Vamp2
GO:0005838	proteasome regulatory particle	3	22	0.0028	ENSMUSP00000030769	ENSMUSP00000051657	ENSMUSP00000071054	Psmc2	Psmc3	Psmd8
GO:0000275	mitochondrial proton-transporting ATP synthase complex	catalytic core F(1)	2	5	0.0038	ENSMUSP00000016396	ENSMUSP00000101006	Atp5d	Atp5e
GO:0005638	lamin filament	2	5	0.0038	ENSMUSP00000025486	ENSMUSP00000029699	Lmna	Lmnb1
GO:0016281	eukaryotic translation initiation factor 4F complex	2	5	0.0038	ENSMUSP00000047678	ENSMUSP00000127774	Eif4b	Eif4g1
GO:0097422	tubular endosome	2	5	0.0038	ENSMUSP00000034131	ENSMUSP00000090130	Vps26a	Vps35
GO:1990111	spermatoproteasome complex	2	5	0.0038	ENSMUSP00000034369	ENSMUSP00000133499	Psmb10	Psmb9
GO:0005719	nuclear euchromatin	3	28	0.0048	ENSMUSP00000031862	ENSMUSP00000036907	ENSMUSP00000110374	Cbx3	H2afz	Rbmx
GO:0045252	oxoglutarate dehydrogenase complex	2	6	0.0048	ENSMUSP00000060346	ENSMUSP00000106481	Dld	Dlst
GO:0120038	plasma membrane bounded cell projection part	22	1532	0.0053	ENSMUSP00000001304	ENSMUSP00000007814	ENSMUSP00000009538	ENSMUSP00000021273	ENSMUSP00000022629	ENSMUSP00000028727	ENSMUSP00000030212	ENSMUSP00000030769	ENSMUSP00000032998	ENSMUSP00000034211	ENSMUSP00000047008	ENSMUSP00000073175	ENSMUSP00000080427	ENSMUSP00000084846	ENSMUSP00000089051	ENSMUSP00000099878	ENSMUSP00000099902	ENSMUSP00000100045	ENSMUSP00000100912	ENSMUSP00000105709	ENSMUSP00000127774	ENSMUSP00000130668	Akr1b3	Aldoa	Calm1	Ckb	Ctnnd2	Dpysl2	Eif4b	Eif5a	Khsrp	Mt3	Ncam1	Psmc2	Rpl26	Rps3	Rps6	Sh3gl2	Snap25	Sptbn1	Stxbp1	Syn2	Syt1	Vamp2
GO:0043292	contractile fiber	7	230	0.0054	ENSMUSP00000021412	ENSMUSP00000031617	ENSMUSP00000034966	ENSMUSP00000071616	ENSMUSP00000084846	ENSMUSP00000099902	ENSMUSP00000114705	Aldoa	Dbi	Psma6	Rpl4	Rpl6	Rpl7	Sptbn1
GO:0150034	distal axon	9	378	0.0063	ENSMUSP00000009538	ENSMUSP00000021273	ENSMUSP00000022629	ENSMUSP00000028727	ENSMUSP00000073175	ENSMUSP00000089051	ENSMUSP00000100912	ENSMUSP00000105709	ENSMUSP00000130668	Calm1	Dpysl2	Ncam1	Rpl26	Snap25	Stxbp1	Syn2	Syt1	Vamp2
GO:0030424	axon	13	712	0.007	ENSMUSP00000005509	ENSMUSP00000009538	ENSMUSP00000021273	ENSMUSP00000022629	ENSMUSP00000028727	ENSMUSP00000034211	ENSMUSP00000035743	ENSMUSP00000073175	ENSMUSP00000089051	ENSMUSP00000099902	ENSMUSP00000100912	ENSMUSP00000105709	ENSMUSP00000130668	Calm1	Dpysl2	Mt3	Ncam1	Pygb	Rpl26	Snap25	Sptbn1	Stx1a	Stxbp1	Syn2	Syt1	Vamp2
GO:0005783	endoplasmic reticulum	22	1574	0.0071	ENSMUSP00000000756	ENSMUSP00000026420	ENSMUSP00000029722	ENSMUSP00000031314	ENSMUSP00000031617	ENSMUSP00000032998	ENSMUSP00000034211	ENSMUSP00000034966	ENSMUSP00000038352	ENSMUSP00000047008	ENSMUSP00000052912	ENSMUSP00000054490	ENSMUSP00000058432	ENSMUSP00000076447	ENSMUSP00000080854	ENSMUSP00000086614	ENSMUSP00000099757	ENSMUSP00000099878	ENSMUSP00000103365	ENSMUSP00000110013	ENSMUSP00000110434	ENSMUSP00000114705	Alb	Dbi	Eif5a	Hadhb	Mt3	Pdia6	Rpl13	Rpl18	Rpl34	Rpl4	Rpl5	Rpl6	Rps21	Rps23	Rps26	Rps26-ps1	Rps28	Rps29	Rps3	Rps3a1	Rps6	Rps8
GO:0031595	nuclear proteasome complex	2	8	0.0072	ENSMUSP00000030769	ENSMUSP00000071054	Psmc2	Psmc3
GO:0008076	voltage-gated potassium channel complex	4	73	0.0073	ENSMUSP00000005509	ENSMUSP00000021273	ENSMUSP00000028727	ENSMUSP00000105709	Calm1	Snap25	Stx1a	Vamp2
GO:0036477	somatodendritic compartment	16	990	0.0073	ENSMUSP00000001304	ENSMUSP00000007814	ENSMUSP00000022629	ENSMUSP00000028727	ENSMUSP00000030212	ENSMUSP00000030769	ENSMUSP00000032998	ENSMUSP00000034131	ENSMUSP00000034211	ENSMUSP00000035105	ENSMUSP00000047008	ENSMUSP00000047968	ENSMUSP00000080427	ENSMUSP00000099878	ENSMUSP00000127774	ENSMUSP00000130668	Ckb	Ctnnd2	Dpysl2	Eif4b	Eif5a	Khsrp	Mt3	Ncam1	Psmc2	Rps3	Rps6	Rpsa	S100b	Sh3gl2	Snap25	Vps35
GO:0099512	supramolecular fiber	14	809	0.0074	ENSMUSP00000021412	ENSMUSP00000023712	ENSMUSP00000025486	ENSMUSP00000029699	ENSMUSP00000030636	ENSMUSP00000031617	ENSMUSP00000034211	ENSMUSP00000034966	ENSMUSP00000038781	ENSMUSP00000051033	ENSMUSP00000071616	ENSMUSP00000084846	ENSMUSP00000099902	ENSMUSP00000114705	Aldoa	Dbi	Krt2	Lmna	Lmnb1	Mt3	Psma6	Rpl4	Rpl6	Rpl7	Sptbn1	Stmn1	Tbca	Tuba1c
GO:0033267	axon part	10	472	0.0077	ENSMUSP00000009538	ENSMUSP00000021273	ENSMUSP00000022629	ENSMUSP00000028727	ENSMUSP00000073175	ENSMUSP00000089051	ENSMUSP00000099902	ENSMUSP00000100912	ENSMUSP00000105709	ENSMUSP00000130668	Calm1	Dpysl2	Ncam1	Rpl26	Snap25	Sptbn1	Stxbp1	Syn2	Syt1	Vamp2
GO:0005742	mitochondrial outer membrane translocase complex	2	10	0.0097	ENSMUSP00000023062	ENSMUSP00000129186	Tomm22	Tomm70a
GO:0030017	sarcomere	6	199	0.0106	ENSMUSP00000021412	ENSMUSP00000031617	ENSMUSP00000034966	ENSMUSP00000071616	ENSMUSP00000084846	ENSMUSP00000099902	Aldoa	Psma6	Rpl4	Rpl6	Rpl7	Sptbn1
GO:0005720	nuclear heterochromatin	3	43	0.0127	ENSMUSP00000031862	ENSMUSP00000036907	ENSMUSP00000084846	Aldoa	Cbx3	H2afz
GO:0008540	proteasome regulatory particle	base subcomplex	2	12	0.0127	ENSMUSP00000030769	ENSMUSP00000071054	Psmc2	Psmc3
GO:0043025	neuronal cell body	12	688	0.0127	ENSMUSP00000001304	ENSMUSP00000007814	ENSMUSP00000022629	ENSMUSP00000028727	ENSMUSP00000030212	ENSMUSP00000034131	ENSMUSP00000035105	ENSMUSP00000047008	ENSMUSP00000047968	ENSMUSP00000080427	ENSMUSP00000127774	ENSMUSP00000130668	Ckb	Ctnnd2	Dpysl2	Eif4b	Eif5a	Khsrp	Ncam1	Rpsa	S100b	Sh3gl2	Snap25	Vps35
GO:0044297	cell body	13	776	0.0127	ENSMUSP00000001304	ENSMUSP00000007814	ENSMUSP00000022629	ENSMUSP00000028727	ENSMUSP00000030212	ENSMUSP00000034131	ENSMUSP00000035105	ENSMUSP00000047008	ENSMUSP00000047968	ENSMUSP00000080427	ENSMUSP00000099878	ENSMUSP00000127774	ENSMUSP00000130668	Ckb	Ctnnd2	Dpysl2	Eif4b	Eif5a	Khsrp	Ncam1	Rps6	Rpsa	S100b	Sh3gl2	Snap25	Vps35
GO:0098794	postsynapse	10	514	0.0127	ENSMUSP00000005509	ENSMUSP00000009538	ENSMUSP00000028727	ENSMUSP00000029082	ENSMUSP00000030769	ENSMUSP00000034131	ENSMUSP00000034211	ENSMUSP00000080427	ENSMUSP00000089051	ENSMUSP00000099902	Ctnnd2	Mt3	Psma7	Psmc2	Snap25	Sptbn1	Stx1a	Stxbp1	Syn2	Vps35
GO:0030672	synaptic vesicle membrane	4	91	0.0134	ENSMUSP00000005509	ENSMUSP00000009538	ENSMUSP00000021273	ENSMUSP00000100912	Stx1a	Syn2	Syt1	Vamp2
GO:0042734	presynaptic membrane	4	93	0.0141	ENSMUSP00000005509	ENSMUSP00000028727	ENSMUSP00000089051	ENSMUSP00000100912	Snap25	Stx1a	Stxbp1	Syt1
GO:0099503	secretory vesicle	10	525	0.0141	ENSMUSP00000005509	ENSMUSP00000009538	ENSMUSP00000021273	ENSMUSP00000028727	ENSMUSP00000034211	ENSMUSP00000076564	ENSMUSP00000089051	ENSMUSP00000100912	ENSMUSP00000106481	ENSMUSP00000114705	Dbi	Dld	Mt3	Rnpep	Snap25	Stx1a	Stxbp1	Syn2	Syt1	Vamp2
GO:0012505	endomembrane system	39	3670	0.0175	ENSMUSP00000000756	ENSMUSP00000005509	ENSMUSP00000009538	ENSMUSP00000021273	ENSMUSP00000025486	ENSMUSP00000026420	ENSMUSP00000028727	ENSMUSP00000029699	ENSMUSP00000029722	ENSMUSP00000030212	ENSMUSP00000031314	ENSMUSP00000031617	ENSMUSP00000031862	ENSMUSP00000032998	ENSMUSP00000034131	ENSMUSP00000034211	ENSMUSP00000034470	ENSMUSP00000034966	ENSMUSP00000038352	ENSMUSP00000047008	ENSMUSP00000052912	ENSMUSP00000054490	ENSMUSP00000058432	ENSMUSP00000076447	ENSMUSP00000076564	ENSMUSP00000080854	ENSMUSP00000086614	ENSMUSP00000089051	ENSMUSP00000090130	ENSMUSP00000099757	ENSMUSP00000099878	ENSMUSP00000099902	ENSMUSP00000100912	ENSMUSP00000103365	ENSMUSP00000106481	ENSMUSP00000110013	ENSMUSP00000110434	ENSMUSP00000114705	ENSMUSP00000121020	Alb	Cbx3	Dbi	Dld	Eif5a	Hadhb
GO:0048471	perinuclear region of cytoplasm	12	730	0.0184	ENSMUSP00000021273	ENSMUSP00000028727	ENSMUSP00000029699	ENSMUSP00000030212	ENSMUSP00000034131	ENSMUSP00000034211	ENSMUSP00000047968	ENSMUSP00000071054	ENSMUSP00000089051	ENSMUSP00000099878	ENSMUSP00000100045	ENSMUSP00000114705	Akr1b3	Dbi	Lmna	Mt3	Psmc3	Rps6	S100b	Sh3gl2	Snap25	Stxbp1	Vamp2	Vps35
GO:0030285	integral component of synaptic vesicle membrane	2	19	0.0253	ENSMUSP00000021273	ENSMUSP00000100912	Syt1	Vamp2
GO:0030425	dendrite	11	694	0.0318	ENSMUSP00000001304	ENSMUSP00000007814	ENSMUSP00000022629	ENSMUSP00000030212	ENSMUSP00000030769	ENSMUSP00000032998	ENSMUSP00000034211	ENSMUSP00000047008	ENSMUSP00000080427	ENSMUSP00000099878	ENSMUSP00000127774	Ckb	Ctnnd2	Dpysl2	Eif4b	Eif5a	Khsrp	Mt3	Psmc2	Rps3	Rps6	Sh3gl2
GO:0014069	postsynaptic density	6	267	0.0348	ENSMUSP00000005509	ENSMUSP00000009538	ENSMUSP00000034131	ENSMUSP00000034211	ENSMUSP00000080427	ENSMUSP00000099902	Ctnnd2	Mt3	Sptbn1	Stx1a	Syn2	Vps35
GO:0097386	glial cell projection	2	23	0.0348	ENSMUSP00000034211	ENSMUSP00000100045	Akr1b3	Mt3
GO:0031307	integral component of mitochondrial outer membrane	2	24	0.0368	ENSMUSP00000023062	ENSMUSP00000129186	Tomm22	Tomm70a
GO:0098562	cytoplasmic side of membrane	5	199	0.0385	ENSMUSP00000026420	ENSMUSP00000028727	ENSMUSP00000038352	ENSMUSP00000076447	ENSMUSP00000110013	Rps26	Rps26-ps1	Rps28	Rps29	Snap25
GO:0031430	M band	2	29	0.0495	ENSMUSP00000084846	ENSMUSP00000099902	Aldoa	Sptbn1
[truncated: 257 more columns]

## Sheet: Molecular Functions
#term ID	term description	observed gene count	background gene count	false discovery rate	matching proteins in your network (IDs)	matching proteins in your network (labels)
GO:0003735	structural constituent of ribosome	52	153	6.23e-65	ENSMUSP00000000756	ENSMUSP00000003521	ENSMUSP00000004072	ENSMUSP00000004554	ENSMUSP00000006496	ENSMUSP00000008812	ENSMUSP00000017548	ENSMUSP00000025511	ENSMUSP00000026420	ENSMUSP00000029722	ENSMUSP00000031617	ENSMUSP00000032998	ENSMUSP00000034966	ENSMUSP00000035105	ENSMUSP00000038352	ENSMUSP00000046506	ENSMUSP00000048469	ENSMUSP00000054490	ENSMUSP00000058432	ENSMUSP00000058919	ENSMUSP00000069004	ENSMUSP00000071616	ENSMUSP00000073175	ENSMUSP00000076447	ENSMUSP00000079180	ENSMUSP00000079340	ENSMUSP00000079628	ENSMUSP00000080354	ENSMUSP00000080523	ENSMUSP00000080854	ENSMUSP00000081474	ENSMUSP00000086614	ENSMUSP00000099435	ENSMUSP00000099757	ENSMUSP00000099878	ENSMUSP00000099909	ENSMUSP00000102213	ENSMUSP00000103365	ENSMUSP00000103940	ENSMUSP00000104067	ENSMUSP00000106014	ENSMUSP00000110013	ENSMUSP00000110532	ENSMUSP00000110731	ENSMUSP00000110886
GO:0005198	structural molecule activity	58	546	1.71e-47	ENSMUSP00000000756	ENSMUSP00000003521	ENSMUSP00000004072	ENSMUSP00000004554	ENSMUSP00000006496	ENSMUSP00000008812	ENSMUSP00000017548	ENSMUSP00000023712	ENSMUSP00000025486	ENSMUSP00000025511	ENSMUSP00000026420	ENSMUSP00000029699	ENSMUSP00000029722	ENSMUSP00000031617	ENSMUSP00000032998	ENSMUSP00000034966	ENSMUSP00000035105	ENSMUSP00000038352	ENSMUSP00000039633	ENSMUSP00000046506	ENSMUSP00000048469	ENSMUSP00000051033	ENSMUSP00000054490	ENSMUSP00000058432	ENSMUSP00000058919	ENSMUSP00000069004	ENSMUSP00000071616	ENSMUSP00000073175	ENSMUSP00000076447	ENSMUSP00000079180	ENSMUSP00000079340	ENSMUSP00000079628	ENSMUSP00000080354	ENSMUSP00000080523	ENSMUSP00000080854	ENSMUSP00000081474	ENSMUSP00000086614	ENSMUSP00000099435	ENSMUSP00000099757	ENSMUSP00000099878	ENSMUSP00000099902	ENSMUSP00000099909	ENSMUSP00000102213	ENSMUSP00000103365	ENSMUSP00000103940
GO:0004298	threonine-type endopeptidase activity	16	21	3.45e-23	ENSMUSP00000005923	ENSMUSP00000014913	ENSMUSP00000018430	ENSMUSP00000021412	ENSMUSP00000022803	ENSMUSP00000028083	ENSMUSP00000029082	ENSMUSP00000030642	ENSMUSP00000033008	ENSMUSP00000034369	ENSMUSP00000034848	ENSMUSP00000088057	ENSMUSP00000099436	ENSMUSP00000125548	ENSMUSP00000129767	ENSMUSP00000133499	Psma1	Psma2	Psma3	Psma4	Psma5	Psma6	Psma7	Psmb1	Psmb10	Psmb2	Psmb3	Psmb4	Psmb5	Psmb6	Psmb7	Psmb9
GO:0003723	RNA binding	45	986	1.67e-21	ENSMUSP00000000756	ENSMUSP00000003521	ENSMUSP00000004072	ENSMUSP00000004554	ENSMUSP00000006496	ENSMUSP00000007814	ENSMUSP00000008812	ENSMUSP00000017548	ENSMUSP00000021412	ENSMUSP00000025511	ENSMUSP00000026420	ENSMUSP00000029722	ENSMUSP00000031617	ENSMUSP00000032998	ENSMUSP00000034966	ENSMUSP00000038135	ENSMUSP00000046506	ENSMUSP00000047008	ENSMUSP00000047678	ENSMUSP00000048469	ENSMUSP00000058919	ENSMUSP00000069004	ENSMUSP00000071616	ENSMUSP00000073175	ENSMUSP00000076447	ENSMUSP00000077612	ENSMUSP00000079340	ENSMUSP00000080354	ENSMUSP00000080854	ENSMUSP00000086614	ENSMUSP00000099435	ENSMUSP00000099878	ENSMUSP00000102213	ENSMUSP00000103365	ENSMUSP00000103940	ENSMUSP00000106014	ENSMUSP00000110013	ENSMUSP00000110374	ENSMUSP00000110532	ENSMUSP00000110886	ENSMUSP00000118787	ENSMUSP00000120528	ENSMUSP00000126294	ENSMUSP00000127774	ENSMUSP00000131489
GO:0019843	rRNA binding	17	67	1.66e-18	ENSMUSP00000003521	ENSMUSP00000004072	ENSMUSP00000004554	ENSMUSP00000006496	ENSMUSP00000008812	ENSMUSP00000017548	ENSMUSP00000025511	ENSMUSP00000031617	ENSMUSP00000032998	ENSMUSP00000034966	ENSMUSP00000046506	ENSMUSP00000058919	ENSMUSP00000071616	ENSMUSP00000080354	ENSMUSP00000080854	ENSMUSP00000099435	ENSMUSP00000126294	Rpl19	Rpl23	Rpl3	Rpl37	Rpl37a	Rpl4	Rpl5	Rpl6	Rpl7	Rpl8	Rps11	Rps13	Rps14	Rps18	Rps3	Rps5	Rps9
GO:0003729	mRNA binding	18	202	1.76e-12	ENSMUSP00000004554	ENSMUSP00000007814	ENSMUSP00000025511	ENSMUSP00000026420	ENSMUSP00000029722	ENSMUSP00000031617	ENSMUSP00000032998	ENSMUSP00000038135	ENSMUSP00000047678	ENSMUSP00000071616	ENSMUSP00000073175	ENSMUSP00000076447	ENSMUSP00000077612	ENSMUSP00000080854	ENSMUSP00000099878	ENSMUSP00000106014	ENSMUSP00000110374	ENSMUSP00000126294	C1qbp	Dhx9	Eif4g1	Khsrp	Rbmx	Rpl26	Rpl30	Rpl5	Rpl6	Rpl7	Rps13	Rps14	Rps26	Rps26-ps1	Rps3	Rps3a1	Rps5	Rps6
GO:0015078	proton transmembrane transporter activity	12	99	1.37e-09	ENSMUSP00000000090	ENSMUSP00000014457	ENSMUSP00000016396	ENSMUSP00000023608	ENSMUSP00000023677	ENSMUSP00000031637	ENSMUSP00000051222	ENSMUSP00000079944	ENSMUSP00000101006	ENSMUSP00000104906	ENSMUSP00000113022	ENSMUSP00000115419	Atp5d	Atp5e	Atp5f1	Atp5j	Atp5k	Atp5o	Cox5a	Cox5b	Cox6c	Cox7c	Ndufa4	Slc2a13
GO:0009055	electron transfer activity	10	65	7.14e-09	ENSMUSP00000000090	ENSMUSP00000014457	ENSMUSP00000023210	ENSMUSP00000031637	ENSMUSP00000045284	ENSMUSP00000053145	ENSMUSP00000077744	ENSMUSP00000079944	ENSMUSP00000106481	ENSMUSP00000115419	Cox5a	Cox5b	Cox6c	Cox7c	Cyc1	Dld	Ndufa4	Uqcrfs1	Uqcrh	Uqcrq
GO:0004175	endopeptidase activity	18	386	3.17e-08	ENSMUSP00000005923	ENSMUSP00000014913	ENSMUSP00000018430	ENSMUSP00000021412	ENSMUSP00000022803	ENSMUSP00000028083	ENSMUSP00000029082	ENSMUSP00000030642	ENSMUSP00000033008	ENSMUSP00000033176	ENSMUSP00000034369	ENSMUSP00000034848	ENSMUSP00000088057	ENSMUSP00000099436	ENSMUSP00000121358	ENSMUSP00000125548	ENSMUSP00000129767	ENSMUSP00000133499	Ide	Psma1	Psma2	Psma3	Psma4	Psma5	Psma6	Psma7	Psmb1	Psmb10	Psmb2	Psmb3	Psmb4	Psmb5	Psmb6	Psmb7	Psmb9	Uqcrc2
GO:0005488	binding	116	10884	3.17e-08	ENSMUSP00000000090	ENSMUSP00000000756	ENSMUSP00000001304	ENSMUSP00000003521	ENSMUSP00000004072	ENSMUSP00000004554	ENSMUSP00000005509	ENSMUSP00000005923	ENSMUSP00000006496	ENSMUSP00000007814	ENSMUSP00000008812	ENSMUSP00000009538	ENSMUSP00000017548	ENSMUSP00000019323	ENSMUSP00000021273	ENSMUSP00000021412	ENSMUSP00000022573	ENSMUSP00000022629	ENSMUSP00000023210	ENSMUSP00000023677	ENSMUSP00000023712	ENSMUSP00000025486	ENSMUSP00000025511	ENSMUSP00000025851	ENSMUSP00000026420	ENSMUSP00000028727	ENSMUSP00000029082	ENSMUSP00000029699	ENSMUSP00000029722	ENSMUSP00000030212	ENSMUSP00000030636	ENSMUSP00000030769	ENSMUSP00000031314	ENSMUSP00000031617	ENSMUSP00000031637	ENSMUSP00000031862	ENSMUSP00000032998	ENSMUSP00000033008	ENSMUSP00000033176	ENSMUSP00000034131	ENSMUSP00000034211	ENSMUSP00000034567	ENSMUSP00000034856	ENSMUSP00000034966	ENSMUSP00000035105
GO:0003676	nucleic acid binding	49	2868	1.42e-07	ENSMUSP00000000756	ENSMUSP00000003521	ENSMUSP00000004072	ENSMUSP00000004554	ENSMUSP00000006496	ENSMUSP00000007814	ENSMUSP00000008812	ENSMUSP00000017548	ENSMUSP00000021412	ENSMUSP00000025511	ENSMUSP00000026420	ENSMUSP00000029722	ENSMUSP00000031314	ENSMUSP00000031617	ENSMUSP00000031862	ENSMUSP00000032998	ENSMUSP00000034966	ENSMUSP00000036907	ENSMUSP00000038135	ENSMUSP00000046506	ENSMUSP00000047008	ENSMUSP00000047678	ENSMUSP00000048469	ENSMUSP00000058919	ENSMUSP00000069004	ENSMUSP00000071616	ENSMUSP00000073175	ENSMUSP00000076447	ENSMUSP00000077612	ENSMUSP00000079340	ENSMUSP00000080354	ENSMUSP00000080854	ENSMUSP00000086614	ENSMUSP00000099435	ENSMUSP00000099878	ENSMUSP00000102213	ENSMUSP00000103365	ENSMUSP00000103940	ENSMUSP00000106014	ENSMUSP00000110013	ENSMUSP00000110374	ENSMUSP00000110532	ENSMUSP00000110886	ENSMUSP00000118787	ENSMUSP00000120528
GO:0070011	peptidase activity	acting on L-amino acid peptides	20	561	2.23e-07	ENSMUSP00000005923	ENSMUSP00000014913	ENSMUSP00000018430	ENSMUSP00000021412	ENSMUSP00000022803	ENSMUSP00000025851	ENSMUSP00000028083	ENSMUSP00000029082	ENSMUSP00000030642	ENSMUSP00000033008	ENSMUSP00000033176	ENSMUSP00000034369	ENSMUSP00000034848	ENSMUSP00000076564	ENSMUSP00000088057	ENSMUSP00000099436	ENSMUSP00000121358	ENSMUSP00000125548	ENSMUSP00000129767	ENSMUSP00000133499	Dpp3	Ide	Psma1	Psma2	Psma3	Psma4	Psma5	Psma6	Psma7	Psmb1	Psmb10	Psmb2	Psmb3	Psmb4	Psmb5	Psmb6	Psmb7	Psmb9	Rnpep	Uqcrc2
GO:0097159	organic cyclic compound binding	64	4818	3.56e-06	ENSMUSP00000000756	ENSMUSP00000001304	ENSMUSP00000003521	ENSMUSP00000004072	ENSMUSP00000004554	ENSMUSP00000006496	ENSMUSP00000007814	ENSMUSP00000008812	ENSMUSP00000009538	ENSMUSP00000017548	ENSMUSP00000021412	ENSMUSP00000023210	ENSMUSP00000023677	ENSMUSP00000025511	ENSMUSP00000026420	ENSMUSP00000029722	ENSMUSP00000030769	ENSMUSP00000031314	ENSMUSP00000031617	ENSMUSP00000031862	ENSMUSP00000032998	ENSMUSP00000034966	ENSMUSP00000035743	ENSMUSP00000036907	ENSMUSP00000038135	ENSMUSP00000046506	ENSMUSP00000047008	ENSMUSP00000047678	ENSMUSP00000048469	ENSMUSP00000051033	ENSMUSP00000058919	ENSMUSP00000069004	ENSMUSP00000071054	ENSMUSP00000071616	ENSMUSP00000073175	ENSMUSP00000074392	ENSMUSP00000076447	ENSMUSP00000077612	ENSMUSP00000079340	ENSMUSP00000080354	ENSMUSP00000080854	ENSMUSP00000086614	ENSMUSP00000099435	ENSMUSP00000099878	ENSMUSP00000102213
GO:1901363	heterocyclic compound binding	63	4748	4.71e-06	ENSMUSP00000000756	ENSMUSP00000001304	ENSMUSP00000003521	ENSMUSP00000004072	ENSMUSP00000004554	ENSMUSP00000006496	ENSMUSP00000007814	ENSMUSP00000008812	ENSMUSP00000009538	ENSMUSP00000017548	ENSMUSP00000021412	ENSMUSP00000023210	ENSMUSP00000025511	ENSMUSP00000026420	ENSMUSP00000029722	ENSMUSP00000030769	ENSMUSP00000031314	ENSMUSP00000031617	ENSMUSP00000031862	ENSMUSP00000032998	ENSMUSP00000034966	ENSMUSP00000035743	ENSMUSP00000036907	ENSMUSP00000038135	ENSMUSP00000046506	ENSMUSP00000047008	ENSMUSP00000047678	ENSMUSP00000048469	ENSMUSP00000051033	ENSMUSP00000058919	ENSMUSP00000069004	ENSMUSP00000071054	ENSMUSP00000071616	ENSMUSP00000073175	ENSMUSP00000074392	ENSMUSP00000076447	ENSMUSP00000077612	ENSMUSP00000079340	ENSMUSP00000080354	ENSMUSP00000080854	ENSMUSP00000086614	ENSMUSP00000099435	ENSMUSP00000099878	ENSMUSP00000102213	ENSMUSP00000103365
GO:0034604	pyruvate dehydrogenase (NAD+) activity	4	5	8.22e-06	ENSMUSP00000011058	ENSMUSP00000022268	ENSMUSP00000034567	ENSMUSP00000106481	Dlat	Dld	Pdhb	Pdhx
GO:0044877	protein-containing complex binding	25	1094	8.72e-06	ENSMUSP00000021273	ENSMUSP00000023677	ENSMUSP00000029722	ENSMUSP00000031637	ENSMUSP00000032998	ENSMUSP00000033176	ENSMUSP00000035105	ENSMUSP00000036907	ENSMUSP00000038135	ENSMUSP00000039633	ENSMUSP00000045284	ENSMUSP00000047008	ENSMUSP00000058432	ENSMUSP00000077612	ENSMUSP00000077744	ENSMUSP00000099902	ENSMUSP00000101006	ENSMUSP00000104067	ENSMUSP00000110434	ENSMUSP00000110731	ENSMUSP00000120976	ENSMUSP00000124509	ENSMUSP00000125977	ENSMUSP00000127774	ENSMUSP00000133499	Atp5d	Atp5o	C1qbp	Dhx9	Eif4b	Eif5a	H2afz	H3f3a	Hadha	Hadhb	Ndufa4	Psmb9	Rpl35a	Rps19	Rps21	Rps24	Rps3	Rps3a1	Rpsa	Sptbn1
GO:0015077	monovalent inorganic cation transmembrane transporter activity	13	329	2.39e-05	ENSMUSP00000000090	ENSMUSP00000014457	ENSMUSP00000016396	ENSMUSP00000023608	ENSMUSP00000023677	ENSMUSP00000028727	ENSMUSP00000031637	ENSMUSP00000051222	ENSMUSP00000079944	ENSMUSP00000101006	ENSMUSP00000104906	ENSMUSP00000113022	ENSMUSP00000115419	Atp5d	Atp5e	Atp5f1	Atp5j	Atp5k	Atp5o	Cox5a	Cox5b	Cox6c	Cox7c	Ndufa4	Slc2a13	Snap25
GO:0004129	cytochrome-c oxidase activity	5	22	2.56e-05	ENSMUSP00000000090	ENSMUSP00000014457	ENSMUSP00000031637	ENSMUSP00000079944	ENSMUSP00000115419	Cox5a	Cox5b	Cox6c	Cox7c	Ndufa4
GO:0048306	calcium-dependent protein binding	7	71	2.58e-05	ENSMUSP00000005509	ENSMUSP00000009538	ENSMUSP00000021273	ENSMUSP00000028727	ENSMUSP00000047968	ENSMUSP00000100912	ENSMUSP00000105709	Calm1	S100b	Snap25	Stx1a	Syn2	Syt1	Vamp2
GO:0048027	mRNA 5'-UTR binding	5	24	3.03e-05	ENSMUSP00000025511	ENSMUSP00000029722	ENSMUSP00000073175	ENSMUSP00000080854	ENSMUSP00000126294	Rpl26	Rpl5	Rps13	Rps14	Rps3a1
GO:0016491	oxidoreductase activity	18	700	6.25e-05	ENSMUSP00000000090	ENSMUSP00000011058	ENSMUSP00000014457	ENSMUSP00000019323	ENSMUSP00000022268	ENSMUSP00000023210	ENSMUSP00000031637	ENSMUSP00000034567	ENSMUSP00000045284	ENSMUSP00000052912	ENSMUSP00000053145	ENSMUSP00000077744	ENSMUSP00000079944	ENSMUSP00000100045	ENSMUSP00000106481	ENSMUSP00000110434	ENSMUSP00000115419	ENSMUSP00000120976	Akr1b3	Cox5a	Cox5b	Cox6c	Cox7c	Cyc1	Dlat	Dld	Hadha	Hadhb	Mdh2	Ndufa4	Pdhb	Pdhx	Pdia6	Uqcrfs1	Uqcrh	Uqcrq
GO:0016787	hydrolase activity	36	2259	6.34e-05	ENSMUSP00000005923	ENSMUSP00000014913	ENSMUSP00000016396	ENSMUSP00000018430	ENSMUSP00000021412	ENSMUSP00000022573	ENSMUSP00000022629	ENSMUSP00000022803	ENSMUSP00000023608	ENSMUSP00000023677	ENSMUSP00000025851	ENSMUSP00000028083	ENSMUSP00000029082	ENSMUSP00000030642	ENSMUSP00000030769	ENSMUSP00000032998	ENSMUSP00000033008	ENSMUSP00000033176	ENSMUSP00000034369	ENSMUSP00000034848	ENSMUSP00000038135	ENSMUSP00000051033	ENSMUSP00000051222	ENSMUSP00000071054	ENSMUSP00000076564	ENSMUSP00000088057	ENSMUSP00000099436	ENSMUSP00000101006	ENSMUSP00000113022	ENSMUSP00000121358	ENSMUSP00000125504	ENSMUSP00000125548	ENSMUSP00000129704	ENSMUSP00000129767	ENSMUSP00000130898	ENSMUSP00000133499	Atp5d	Atp5e	Atp5f1	Atp5j	Atp5j2	Atp5k	Atp5o	Dhx9	Dpp3
GO:0008097	5S rRNA binding	4	13	8.41e-05	ENSMUSP00000034966	ENSMUSP00000071616	ENSMUSP00000080354	ENSMUSP00000080854	Rpl3	Rpl4	Rpl5	Rpl7
GO:1990932	5.8S rRNA binding	3	3	0.0001	ENSMUSP00000006496	ENSMUSP00000017548	ENSMUSP00000031617	Rpl19	Rpl6	Rps9
GO:0008121	ubiquinol-cytochrome-c reductase activity	3	5	0.00028	ENSMUSP00000045284	ENSMUSP00000053145	ENSMUSP00000077744	Uqcrfs1	Uqcrh	Uqcrq
GO:0070180	large ribosomal subunit rRNA binding	3	6	0.00039	ENSMUSP00000017548	ENSMUSP00000058919	ENSMUSP00000099435	Rpl19	Rpl23	Rpl37a
GO:0016903	oxidoreductase activity	acting on the aldehyde or oxo group of donors	5	50	0.00057	ENSMUSP00000011058	ENSMUSP00000022268	ENSMUSP00000034567	ENSMUSP00000100045	ENSMUSP00000106481	Akr1b3	Dlat	Dld	Pdhb	Pdhx
GO:0017075	syntaxin-1 binding	4	24	0.00057	ENSMUSP00000021273	ENSMUSP00000028727	ENSMUSP00000089051	ENSMUSP00000100912	Snap25	Stxbp1	Syt1	Vamp2
GO:0003824	catalytic activity	60	5239	0.00061	ENSMUSP00000000090	ENSMUSP00000001304	ENSMUSP00000005923	ENSMUSP00000011058	ENSMUSP00000014457	ENSMUSP00000014913	ENSMUSP00000016396	ENSMUSP00000018430	ENSMUSP00000019323	ENSMUSP00000021412	ENSMUSP00000022268	ENSMUSP00000022573	ENSMUSP00000022629	ENSMUSP00000022803	ENSMUSP00000023210	ENSMUSP00000023608	ENSMUSP00000023677	ENSMUSP00000025851	ENSMUSP00000028083	ENSMUSP00000029082	ENSMUSP00000030642	ENSMUSP00000030769	ENSMUSP00000031637	ENSMUSP00000032998	ENSMUSP00000033008	ENSMUSP00000033176	ENSMUSP00000034369	ENSMUSP00000034567	ENSMUSP00000034848	ENSMUSP00000034856	ENSMUSP00000035743	ENSMUSP00000038135	ENSMUSP00000045284	ENSMUSP00000051033	ENSMUSP00000051222	ENSMUSP00000052912	ENSMUSP00000053145	ENSMUSP00000060346	ENSMUSP00000071054	ENSMUSP00000076564	ENSMUSP00000077733	ENSMUSP00000077744	ENSMUSP00000079944	ENSMUSP00000084846	ENSMUSP00000088057
GO:0070181	small ribosomal subunit rRNA binding	3	8	0.00066	ENSMUSP00000025511	ENSMUSP00000032998	ENSMUSP00000126294	Rps13	Rps14	Rps3
GO:0043021	ribonucleoprotein complex binding	7	136	0.00087	ENSMUSP00000035105	ENSMUSP00000038135	ENSMUSP00000047008	ENSMUSP00000058432	ENSMUSP00000077612	ENSMUSP00000110731	ENSMUSP00000127774	C1qbp	Dhx9	Eif4b	Eif5a	Rpl35a	Rps21	Rpsa
GO:0016887	ATPase activity	11	372	0.0011	ENSMUSP00000016396	ENSMUSP00000023608	ENSMUSP00000023677	ENSMUSP00000030769	ENSMUSP00000038135	ENSMUSP00000051222	ENSMUSP00000071054	ENSMUSP00000101006	ENSMUSP00000113022	ENSMUSP00000121358	ENSMUSP00000125504	Atp5d	Atp5e	Atp5f1	Atp5j	Atp5j2	Atp5k	Atp5o	Dhx9	Ide	Psmc2	Psmc3
GO:0046933	proton-transporting ATP synthase activity	rotational mechanism	3	11	0.0013	ENSMUSP00000016396	ENSMUSP00000023677	ENSMUSP00000101006	Atp5d	Atp5e	Atp5o
GO:0031369	translation initiation factor binding	4	36	0.0019	ENSMUSP00000029722	ENSMUSP00000047678	ENSMUSP00000104067	ENSMUSP00000125977	Eif4g1	Rps19	Rps24	Rps3a1
GO:0047485	protein N-terminus binding	6	123	0.0032	ENSMUSP00000005509	ENSMUSP00000028727	ENSMUSP00000047008	ENSMUSP00000058432	ENSMUSP00000089051	ENSMUSP00000105709	Calm1	Eif5a	Rps21	Snap25	Stx1a	Stxbp1
GO:0016508	long-chain-enoyl-CoA hydratase activity	2	3	0.0048	ENSMUSP00000110434	ENSMUSP00000120976	Hadha	Hadhb
GO:0016509	long-chain-3-hydroxyacyl-CoA dehydrogenase activity	2	3	0.0048	ENSMUSP00000110434	ENSMUSP00000120976	Hadha	Hadhb
GO:0000062	fatty-acyl-CoA binding	3	23	0.0075	ENSMUSP00000110434	ENSMUSP00000114705	ENSMUSP00000120976	Dbi	Hadha	Hadhb
GO:0043022	ribosome binding	4	57	0.0085	ENSMUSP00000035105	ENSMUSP00000047008	ENSMUSP00000058432	ENSMUSP00000077612	C1qbp	Eif5a	Rps21	Rpsa
GO:0036402	proteasome-activating ATPase activity	2	6	0.0119	ENSMUSP00000030769	ENSMUSP00000071054	Psmc2	Psmc3
GO:1990948	ubiquitin ligase inhibitor activity	2	6	0.0119	ENSMUSP00000080854	ENSMUSP00000099435	Rpl23	Rpl5
GO:0008565	protein transporter activity	4	67	0.0139	ENSMUSP00000023062	ENSMUSP00000034131	ENSMUSP00000034470	ENSMUSP00000090130	Tomm22	Vps26a	Vps26b	Vps35
GO:0045182	translation regulator activity	5	117	0.0147	ENSMUSP00000006496	ENSMUSP00000025511	ENSMUSP00000047008	ENSMUSP00000047678	ENSMUSP00000127774	Eif4b	Eif4g1	Eif5a	Rps14	Rps9
GO:0005215	transporter activity	17	1067	0.015	ENSMUSP00000000090	ENSMUSP00000014457	ENSMUSP00000016396	ENSMUSP00000023062	ENSMUSP00000023608	ENSMUSP00000023677	ENSMUSP00000028727	ENSMUSP00000031637	ENSMUSP00000034131	ENSMUSP00000034470	ENSMUSP00000051222	ENSMUSP00000079944	ENSMUSP00000090130	ENSMUSP00000101006	ENSMUSP00000104906	ENSMUSP00000113022	ENSMUSP00000115419	Atp5d	Atp5e	Atp5f1	Atp5j	Atp5k	Atp5o	Cox5a	Cox5b	Cox6c	Cox7c	Ndufa4	Slc2a13	Snap25	Tomm22	Vps26a	Vps26b	Vps35
GO:0003988	acetyl-CoA C-acyltransferase activity	2	8	0.0168	ENSMUSP00000110434	ENSMUSP00000120976	Hadha	Hadhb
GO:0004300	enoyl-CoA hydratase activity	2	8	0.0168	ENSMUSP00000110434	ENSMUSP00000120976	Hadha	Hadhb
GO:0000149	SNARE binding	5	125	0.0179	ENSMUSP00000005509	ENSMUSP00000021273	ENSMUSP00000028727	ENSMUSP00000089051	ENSMUSP00000100912	Snap25	Stx1a	Stxbp1	Syt1	Vamp2
GO:0005484	SNAP receptor activity	3	37	0.0205	ENSMUSP00000005509	ENSMUSP00000021273	ENSMUSP00000028727	Snap25	Stx1a	Vamp2
GO:0019855	calcium channel inhibitor activity	2	10	0.0222	ENSMUSP00000005509	ENSMUSP00000105709	Calm1	Stx1a
GO:0008092	cytoskeletal protein binding	14	877	0.0316	ENSMUSP00000005509	ENSMUSP00000021273	ENSMUSP00000022629	ENSMUSP00000023712	ENSMUSP00000028727	ENSMUSP00000030636	ENSMUSP00000032998	ENSMUSP00000038781	ENSMUSP00000039633	ENSMUSP00000047968	ENSMUSP00000074392	ENSMUSP00000084846	ENSMUSP00000099902	ENSMUSP00000107795	Aldoa	Dpysl2	Hsph1	Krt2	Rps3	S100b	Snap25	Sptbn1	Stmn1	Stx1a	Tbca	Tln2	Tmsb4x	Vamp2
GO:0042802	identical protein binding	23	1798	0.0331	ENSMUSP00000019323	ENSMUSP00000021273	ENSMUSP00000022573	ENSMUSP00000022629	ENSMUSP00000029082	ENSMUSP00000029699	ENSMUSP00000030212	ENSMUSP00000031314	ENSMUSP00000031862	ENSMUSP00000034567	ENSMUSP00000035743	ENSMUSP00000047678	ENSMUSP00000047968	ENSMUSP00000071054	ENSMUSP00000071616	ENSMUSP00000077733	ENSMUSP00000084846	ENSMUSP00000089051	ENSMUSP00000100912	ENSMUSP00000104067	ENSMUSP00000110374	ENSMUSP00000121358	ENSMUSP00000130668	Alb	Aldoa	Cbx3	Dhps	Dlat	Dpysl2	Eif4g1	Esd	Ide	Lmna	Mdh2	Ncam1	Psma7	Psmc3	Pygb	Rbmx	Rpl7	Rps19	S100b	Sh3gl2	Stxbp1	Syt1
GO:0031492	nucleosomal DNA binding	2	14	0.0368	ENSMUSP00000036907	ENSMUSP00000124509	H2afz	H3f3a
GO:0017111	nucleoside-triphosphatase activity	12	714	0.0371	ENSMUSP00000016396	ENSMUSP00000023608	ENSMUSP00000023677	ENSMUSP00000030769	ENSMUSP00000038135	ENSMUSP00000051033	ENSMUSP00000051222	ENSMUSP00000071054	ENSMUSP00000101006	ENSMUSP00000113022	ENSMUSP00000121358	ENSMUSP00000125504	Atp5d	Atp5e	Atp5f1	Atp5j	Atp5j2	Atp5k	Atp5o	Dhx9	Ide	Psmc2	Psmc3	Tuba1c
GO:1901681	sulfur compound binding	6	221	0.0371	ENSMUSP00000106481	ENSMUSP00000110434	ENSMUSP00000114705	ENSMUSP00000118787	ENSMUSP00000120976	ENSMUSP00000130668	Dbi	Dld	Hadha	Hadhb	Ncam1	Rpl22
GO:0001047	core promoter binding	4	103	0.0451	ENSMUSP00000036907	ENSMUSP00000038135	ENSMUSP00000110374	ENSMUSP00000124509	Dhx9	H2afz	H3f3a	Rbmx
GO:0022857	transmembrane transporter activity	14	933	0.0481	ENSMUSP00000000090	ENSMUSP00000014457	ENSMUSP00000016396	ENSMUSP00000023062	ENSMUSP00000023608	ENSMUSP00000023677	ENSMUSP00000028727	ENSMUSP00000031637	ENSMUSP00000051222	ENSMUSP00000079944	ENSMUSP00000101006	ENSMUSP00000104906	ENSMUSP00000113022	ENSMUSP00000115419	Atp5d	Atp5e	Atp5f1	Atp5j	Atp5k	Atp5o	Cox5a	Cox5b	Cox6c	Cox7c	Ndufa4	Slc2a13	Snap25	Tomm22
[truncated: 187 more columns]

## Sheet: Biological Processes
vesicle transport	term description	observed gene count	background gene count	false discovery rate	matching proteins in your network (IDs)	matching proteins in your network (labels)
GO:0006412	translation	53	313	1.42e-51	ENSMUSP00000000756	ENSMUSP00000003521	ENSMUSP00000004072	ENSMUSP00000004554	ENSMUSP00000006496	ENSMUSP00000008812	ENSMUSP00000017548	ENSMUSP00000025511	ENSMUSP00000026420	ENSMUSP00000029722	ENSMUSP00000031617	ENSMUSP00000032998	ENSMUSP00000034966	ENSMUSP00000035105	ENSMUSP00000038352	ENSMUSP00000046506	ENSMUSP00000047008	ENSMUSP00000047678	ENSMUSP00000048469	ENSMUSP00000054490	ENSMUSP00000058432	ENSMUSP00000058919	ENSMUSP00000069004	ENSMUSP00000071616	ENSMUSP00000073175	ENSMUSP00000076447	ENSMUSP00000079340	ENSMUSP00000079628	ENSMUSP00000080354	ENSMUSP00000080523	ENSMUSP00000080854	ENSMUSP00000081474	ENSMUSP00000086614	ENSMUSP00000099435	ENSMUSP00000099757	ENSMUSP00000099878	ENSMUSP00000099909	ENSMUSP00000102213	ENSMUSP00000103365	ENSMUSP00000103940	ENSMUSP00000104067	ENSMUSP00000106014	ENSMUSP00000110013	ENSMUSP00000110731	ENSMUSP00000110886
GO:0043604	amide biosynthetic process	57	414	1.42e-51	ENSMUSP00000000756	ENSMUSP00000003521	ENSMUSP00000004072	ENSMUSP00000004554	ENSMUSP00000006496	ENSMUSP00000008812	ENSMUSP00000011058	ENSMUSP00000017548	ENSMUSP00000022268	ENSMUSP00000025511	ENSMUSP00000026420	ENSMUSP00000029722	ENSMUSP00000031617	ENSMUSP00000032998	ENSMUSP00000034567	ENSMUSP00000034966	ENSMUSP00000035105	ENSMUSP00000038352	ENSMUSP00000046506	ENSMUSP00000047008	ENSMUSP00000047678	ENSMUSP00000048469	ENSMUSP00000054490	ENSMUSP00000058432	ENSMUSP00000058919	ENSMUSP00000069004	ENSMUSP00000071616	ENSMUSP00000073175	ENSMUSP00000076447	ENSMUSP00000079340	ENSMUSP00000079628	ENSMUSP00000080354	ENSMUSP00000080523	ENSMUSP00000080854	ENSMUSP00000081474	ENSMUSP00000086614	ENSMUSP00000099435	ENSMUSP00000099757	ENSMUSP00000099878	ENSMUSP00000099909	ENSMUSP00000102213	ENSMUSP00000103365	ENSMUSP00000103940	ENSMUSP00000104067	ENSMUSP00000106014
GO:0006518	peptide metabolic process	55	440	7.69e-48	ENSMUSP00000000756	ENSMUSP00000003521	ENSMUSP00000004072	ENSMUSP00000004554	ENSMUSP00000006496	ENSMUSP00000008812	ENSMUSP00000017548	ENSMUSP00000025511	ENSMUSP00000026420	ENSMUSP00000029722	ENSMUSP00000031617	ENSMUSP00000032998	ENSMUSP00000034966	ENSMUSP00000035105	ENSMUSP00000038352	ENSMUSP00000046506	ENSMUSP00000047008	ENSMUSP00000047678	ENSMUSP00000048469	ENSMUSP00000054490	ENSMUSP00000058432	ENSMUSP00000058919	ENSMUSP00000069004	ENSMUSP00000071616	ENSMUSP00000073175	ENSMUSP00000076447	ENSMUSP00000076564	ENSMUSP00000079340	ENSMUSP00000079628	ENSMUSP00000080354	ENSMUSP00000080523	ENSMUSP00000080854	ENSMUSP00000081474	ENSMUSP00000086614	ENSMUSP00000099435	ENSMUSP00000099757	ENSMUSP00000099878	ENSMUSP00000099909	ENSMUSP00000102213	ENSMUSP00000103365	ENSMUSP00000103940	ENSMUSP00000104067	ENSMUSP00000106014	ENSMUSP00000110013	ENSMUSP00000110731
GO:0043603	cellular amide metabolic process	60	644	6.21e-46	ENSMUSP00000000756	ENSMUSP00000003521	ENSMUSP00000004072	ENSMUSP00000004554	ENSMUSP00000006496	ENSMUSP00000008812	ENSMUSP00000011058	ENSMUSP00000017548	ENSMUSP00000022268	ENSMUSP00000025511	ENSMUSP00000026420	ENSMUSP00000029722	ENSMUSP00000031617	ENSMUSP00000032998	ENSMUSP00000034567	ENSMUSP00000034966	ENSMUSP00000035105	ENSMUSP00000038352	ENSMUSP00000046506	ENSMUSP00000047008	ENSMUSP00000047678	ENSMUSP00000048469	ENSMUSP00000054490	ENSMUSP00000058432	ENSMUSP00000058919	ENSMUSP00000060346	ENSMUSP00000069004	ENSMUSP00000071616	ENSMUSP00000073175	ENSMUSP00000076447	ENSMUSP00000076564	ENSMUSP00000079340	ENSMUSP00000079628	ENSMUSP00000080354	ENSMUSP00000080523	ENSMUSP00000080854	ENSMUSP00000081474	ENSMUSP00000086614	ENSMUSP00000099435	ENSMUSP00000099757	ENSMUSP00000099878	ENSMUSP00000099909	ENSMUSP00000102213	ENSMUSP00000103365	ENSMUSP00000103940
GO:1901566	organonitrogen compound biosynthetic process	69	1122	8.7e-43	ENSMUSP00000000756	ENSMUSP00000003521	ENSMUSP00000004072	ENSMUSP00000004554	ENSMUSP00000006496	ENSMUSP00000008812	ENSMUSP00000011058	ENSMUSP00000016396	ENSMUSP00000017548	ENSMUSP00000022268	ENSMUSP00000023210	ENSMUSP00000023608	ENSMUSP00000023677	ENSMUSP00000025511	ENSMUSP00000026420	ENSMUSP00000029722	ENSMUSP00000031617	ENSMUSP00000032998	ENSMUSP00000034567	ENSMUSP00000034856	ENSMUSP00000034966	ENSMUSP00000035105	ENSMUSP00000038352	ENSMUSP00000046506	ENSMUSP00000047008	ENSMUSP00000047678	ENSMUSP00000048469	ENSMUSP00000051222	ENSMUSP00000054490	ENSMUSP00000058432	ENSMUSP00000058919	ENSMUSP00000069004	ENSMUSP00000071616	ENSMUSP00000073175	ENSMUSP00000076447	ENSMUSP00000079340	ENSMUSP00000079628	ENSMUSP00000079944	ENSMUSP00000080354	ENSMUSP00000080523	ENSMUSP00000080854	ENSMUSP00000081474	ENSMUSP00000084846	ENSMUSP00000086614	ENSMUSP00000099435
GO:1901564	organonitrogen compound metabolic process	110	4480	1.15e-37	ENSMUSP00000000090	ENSMUSP00000000756	ENSMUSP00000003521	ENSMUSP00000004072	ENSMUSP00000004554	ENSMUSP00000005923	ENSMUSP00000006496	ENSMUSP00000008812	ENSMUSP00000011058	ENSMUSP00000014913	ENSMUSP00000016396	ENSMUSP00000017548	ENSMUSP00000018430	ENSMUSP00000019323	ENSMUSP00000021412	ENSMUSP00000022268	ENSMUSP00000022803	ENSMUSP00000023210	ENSMUSP00000023608	ENSMUSP00000023677	ENSMUSP00000023712	ENSMUSP00000025511	ENSMUSP00000025851	ENSMUSP00000026420	ENSMUSP00000028083	ENSMUSP00000029082	ENSMUSP00000029722	ENSMUSP00000030642	ENSMUSP00000030769	ENSMUSP00000031617	ENSMUSP00000032998	ENSMUSP00000033008	ENSMUSP00000033176	ENSMUSP00000034131	ENSMUSP00000034211	ENSMUSP00000034369	ENSMUSP00000034567	ENSMUSP00000034848	ENSMUSP00000034856	ENSMUSP00000034966	ENSMUSP00000035105	ENSMUSP00000038352	ENSMUSP00000046506	ENSMUSP00000047008	ENSMUSP00000047678
GO:0002181	cytoplasmic translation	27	55	7.38e-36	ENSMUSP00000004072	ENSMUSP00000017548	ENSMUSP00000026420	ENSMUSP00000029722	ENSMUSP00000031617	ENSMUSP00000032998	ENSMUSP00000034966	ENSMUSP00000038352	ENSMUSP00000048469	ENSMUSP00000054490	ENSMUSP00000058432	ENSMUSP00000071616	ENSMUSP00000073175	ENSMUSP00000076447	ENSMUSP00000079340	ENSMUSP00000080523	ENSMUSP00000081474	ENSMUSP00000102213	ENSMUSP00000103365	ENSMUSP00000106014	ENSMUSP00000110013	ENSMUSP00000110731	ENSMUSP00000110886	ENSMUSP00000118787	ENSMUSP00000120528	ENSMUSP00000127774	ENSMUSP00000137631	Eif4b	Rpl10a	Rpl18	Rpl19	Rpl22	Rpl26	Rpl30	Rpl31	Rpl32	Rpl35a	Rpl36	Rpl38	Rpl39	Rpl4	Rpl6	Rpl7	Rpl8	Rplp2
GO:0044267	cellular protein metabolic process	84	2995	3.38e-29	ENSMUSP00000000756	ENSMUSP00000003521	ENSMUSP00000004072	ENSMUSP00000004554	ENSMUSP00000005923	ENSMUSP00000006496	ENSMUSP00000008812	ENSMUSP00000014913	ENSMUSP00000017548	ENSMUSP00000018430	ENSMUSP00000019323	ENSMUSP00000021412	ENSMUSP00000022803	ENSMUSP00000023712	ENSMUSP00000025511	ENSMUSP00000026420	ENSMUSP00000028083	ENSMUSP00000029082	ENSMUSP00000029722	ENSMUSP00000030642	ENSMUSP00000030769	ENSMUSP00000031617	ENSMUSP00000032998	ENSMUSP00000033008	ENSMUSP00000033176	ENSMUSP00000034131	ENSMUSP00000034211	ENSMUSP00000034369	ENSMUSP00000034848	ENSMUSP00000034856	ENSMUSP00000034966	ENSMUSP00000035105	ENSMUSP00000038352	ENSMUSP00000046506	ENSMUSP00000047008	ENSMUSP00000047678	ENSMUSP00000048469	ENSMUSP00000051657	ENSMUSP00000054490	ENSMUSP00000058432	ENSMUSP00000058919	ENSMUSP00000060346	ENSMUSP00000069004	ENSMUSP00000071054	ENSMUSP00000071616
GO:0044237	cellular metabolic process	123	7348	9.48e-28	ENSMUSP00000000090	ENSMUSP00000000756	ENSMUSP00000001304	ENSMUSP00000003521	ENSMUSP00000004072	ENSMUSP00000004554	ENSMUSP00000005923	ENSMUSP00000006496	ENSMUSP00000007814	ENSMUSP00000008812	ENSMUSP00000011058	ENSMUSP00000014457	ENSMUSP00000014913	ENSMUSP00000016396	ENSMUSP00000017548	ENSMUSP00000018430	ENSMUSP00000019323	ENSMUSP00000021412	ENSMUSP00000022268	ENSMUSP00000022573	ENSMUSP00000022803	ENSMUSP00000023210	ENSMUSP00000023608	ENSMUSP00000023677	ENSMUSP00000023712	ENSMUSP00000025511	ENSMUSP00000026420	ENSMUSP00000028083	ENSMUSP00000028727	ENSMUSP00000029082	ENSMUSP00000029722	ENSMUSP00000030642	ENSMUSP00000030769	ENSMUSP00000031617	ENSMUSP00000031637	ENSMUSP00000031862	ENSMUSP00000032998	ENSMUSP00000033008	ENSMUSP00000033176	ENSMUSP00000034131	ENSMUSP00000034211	ENSMUSP00000034369	ENSMUSP00000034567	ENSMUSP00000034848	ENSMUSP00000034856
GO:0019538	protein metabolic process	88	3580	5.65e-27	ENSMUSP00000000756	ENSMUSP00000003521	ENSMUSP00000004072	ENSMUSP00000004554	ENSMUSP00000005923	ENSMUSP00000006496	ENSMUSP00000008812	ENSMUSP00000014913	ENSMUSP00000017548	ENSMUSP00000018430	ENSMUSP00000019323	ENSMUSP00000021412	ENSMUSP00000022803	ENSMUSP00000023712	ENSMUSP00000025511	ENSMUSP00000025851	ENSMUSP00000026420	ENSMUSP00000028083	ENSMUSP00000029082	ENSMUSP00000029722	ENSMUSP00000030642	ENSMUSP00000030769	ENSMUSP00000031617	ENSMUSP00000032998	ENSMUSP00000033008	ENSMUSP00000033176	ENSMUSP00000034131	ENSMUSP00000034211	ENSMUSP00000034369	ENSMUSP00000034848	ENSMUSP00000034856	ENSMUSP00000034966	ENSMUSP00000035105	ENSMUSP00000038352	ENSMUSP00000046506	ENSMUSP00000047008	ENSMUSP00000047678	ENSMUSP00000048469	ENSMUSP00000051657	ENSMUSP00000054490	ENSMUSP00000058432	ENSMUSP00000058919	ENSMUSP00000060346	ENSMUSP00000069004	ENSMUSP00000071054
GO:0008152	metabolic process	125	8164	1.13e-24	ENSMUSP00000000090	ENSMUSP00000000756	ENSMUSP00000001304	ENSMUSP00000003521	ENSMUSP00000004072	ENSMUSP00000004554	ENSMUSP00000005923	ENSMUSP00000006496	ENSMUSP00000007814	ENSMUSP00000008812	ENSMUSP00000011058	ENSMUSP00000014457	ENSMUSP00000014913	ENSMUSP00000016396	ENSMUSP00000017548	ENSMUSP00000018430	ENSMUSP00000019323	ENSMUSP00000021412	ENSMUSP00000022268	ENSMUSP00000022573	ENSMUSP00000022803	ENSMUSP00000023210	ENSMUSP00000023608	ENSMUSP00000023677	ENSMUSP00000023712	ENSMUSP00000025511	ENSMUSP00000025851	ENSMUSP00000026420	ENSMUSP00000028083	ENSMUSP00000028727	ENSMUSP00000029082	ENSMUSP00000029722	ENSMUSP00000030642	ENSMUSP00000030769	ENSMUSP00000031617	ENSMUSP00000031637	ENSMUSP00000031862	ENSMUSP00000032998	ENSMUSP00000033008	ENSMUSP00000033176	ENSMUSP00000034131	ENSMUSP00000034211	ENSMUSP00000034369	ENSMUSP00000034567	ENSMUSP00000034848
GO:0044271	cellular nitrogen compound biosynthetic process	74	2781	2.38e-23	ENSMUSP00000000756	ENSMUSP00000003521	ENSMUSP00000004072	ENSMUSP00000004554	ENSMUSP00000006496	ENSMUSP00000007814	ENSMUSP00000008812	ENSMUSP00000011058	ENSMUSP00000016396	ENSMUSP00000017548	ENSMUSP00000022268	ENSMUSP00000023210	ENSMUSP00000023608	ENSMUSP00000023677	ENSMUSP00000025511	ENSMUSP00000026420	ENSMUSP00000029722	ENSMUSP00000031617	ENSMUSP00000031862	ENSMUSP00000032998	ENSMUSP00000034567	ENSMUSP00000034856	ENSMUSP00000034966	ENSMUSP00000035105	ENSMUSP00000038135	ENSMUSP00000038352	ENSMUSP00000046506	ENSMUSP00000047008	ENSMUSP00000047678	ENSMUSP00000048469	ENSMUSP00000051222	ENSMUSP00000054490	ENSMUSP00000058432	ENSMUSP00000058919	ENSMUSP00000069004	ENSMUSP00000071616	ENSMUSP00000073175	ENSMUSP00000076447	ENSMUSP00000077612	ENSMUSP00000079340	ENSMUSP00000079628	ENSMUSP00000079944	ENSMUSP00000080354	ENSMUSP00000080427	ENSMUSP00000080523
GO:0009987	cellular process	148	12459	2.56e-23	ENSMUSP00000000090	ENSMUSP00000000756	ENSMUSP00000001304	ENSMUSP00000003521	ENSMUSP00000004072	ENSMUSP00000004554	ENSMUSP00000005509	ENSMUSP00000005923	ENSMUSP00000006496	ENSMUSP00000007814	ENSMUSP00000008812	ENSMUSP00000009538	ENSMUSP00000011058	ENSMUSP00000014457	ENSMUSP00000014913	ENSMUSP00000016396	ENSMUSP00000017548	ENSMUSP00000018430	ENSMUSP00000019323	ENSMUSP00000021273	ENSMUSP00000021412	ENSMUSP00000022268	ENSMUSP00000022573	ENSMUSP00000022629	ENSMUSP00000022803	ENSMUSP00000023062	ENSMUSP00000023210	ENSMUSP00000023608	ENSMUSP00000023677	ENSMUSP00000023712	ENSMUSP00000025486	ENSMUSP00000025511	ENSMUSP00000026420	ENSMUSP00000028083	ENSMUSP00000028727	ENSMUSP00000029082	ENSMUSP00000029699	ENSMUSP00000029722	ENSMUSP00000030212	ENSMUSP00000030636	ENSMUSP00000030642	ENSMUSP00000030769	ENSMUSP00000031314	ENSMUSP00000031617	ENSMUSP00000031637
GO:0006807	nitrogen compound metabolic process	114	6983	5.15e-23	ENSMUSP00000000090	ENSMUSP00000000756	ENSMUSP00000003521	ENSMUSP00000004072	ENSMUSP00000004554	ENSMUSP00000005923	ENSMUSP00000006496	ENSMUSP00000007814	ENSMUSP00000008812	ENSMUSP00000011058	ENSMUSP00000014913	ENSMUSP00000016396	ENSMUSP00000017548	ENSMUSP00000018430	ENSMUSP00000019323	ENSMUSP00000021412	ENSMUSP00000022268	ENSMUSP00000022803	ENSMUSP00000023210	ENSMUSP00000023608	ENSMUSP00000023677	ENSMUSP00000023712	ENSMUSP00000025511	ENSMUSP00000025851	ENSMUSP00000026420	ENSMUSP00000028083	ENSMUSP00000029082	ENSMUSP00000029722	ENSMUSP00000030642	ENSMUSP00000030769	ENSMUSP00000031617	ENSMUSP00000031862	ENSMUSP00000032998	ENSMUSP00000033008	ENSMUSP00000033176	ENSMUSP00000034131	ENSMUSP00000034211	ENSMUSP00000034369	ENSMUSP00000034567	ENSMUSP00000034848	ENSMUSP00000034856	ENSMUSP00000034966	ENSMUSP00000035105	ENSMUSP00000038135	ENSMUSP00000038352
GO:0044238	primary metabolic process	117	7426	9.45e-23	ENSMUSP00000000090	ENSMUSP00000000756	ENSMUSP00000003521	ENSMUSP00000004072	ENSMUSP00000004554	ENSMUSP00000005923	ENSMUSP00000006496	ENSMUSP00000007814	ENSMUSP00000008812	ENSMUSP00000011058	ENSMUSP00000014913	ENSMUSP00000016396	ENSMUSP00000017548	ENSMUSP00000018430	ENSMUSP00000019323	ENSMUSP00000021412	ENSMUSP00000022268	ENSMUSP00000022803	ENSMUSP00000023210	ENSMUSP00000023608	ENSMUSP00000023677	ENSMUSP00000023712	ENSMUSP00000025511	ENSMUSP00000025851	ENSMUSP00000026420	ENSMUSP00000028083	ENSMUSP00000029082	ENSMUSP00000029722	ENSMUSP00000030642	ENSMUSP00000030769	ENSMUSP00000031617	ENSMUSP00000031862	ENSMUSP00000032998	ENSMUSP00000033008	ENSMUSP00000033176	ENSMUSP00000034131	ENSMUSP00000034211	ENSMUSP00000034369	ENSMUSP00000034567	ENSMUSP00000034848	ENSMUSP00000034856	ENSMUSP00000034966	ENSMUSP00000035105	ENSMUSP00000035743	ENSMUSP00000038135
GO:0071704	organic substance metabolic process	119	7733	1.44e-22	ENSMUSP00000000090	ENSMUSP00000000756	ENSMUSP00000003521	ENSMUSP00000004072	ENSMUSP00000004554	ENSMUSP00000005923	ENSMUSP00000006496	ENSMUSP00000007814	ENSMUSP00000008812	ENSMUSP00000011058	ENSMUSP00000014913	ENSMUSP00000016396	ENSMUSP00000017548	ENSMUSP00000018430	ENSMUSP00000019323	ENSMUSP00000021412	ENSMUSP00000022268	ENSMUSP00000022573	ENSMUSP00000022803	ENSMUSP00000023210	ENSMUSP00000023608	ENSMUSP00000023677	ENSMUSP00000023712	ENSMUSP00000025511	ENSMUSP00000025851	ENSMUSP00000026420	ENSMUSP00000028083	ENSMUSP00000028727	ENSMUSP00000029082	ENSMUSP00000029722	ENSMUSP00000030642	ENSMUSP00000030769	ENSMUSP00000031617	ENSMUSP00000031862	ENSMUSP00000032998	ENSMUSP00000033008	ENSMUSP00000033176	ENSMUSP00000034131	ENSMUSP00000034211	ENSMUSP00000034369	ENSMUSP00000034567	ENSMUSP00000034848	ENSMUSP00000034856	ENSMUSP00000034966	ENSMUSP00000035105
GO:0022613	ribonucleoprotein complex biogenesis	30	380	9.48e-20	ENSMUSP00000004554	ENSMUSP00000008812	ENSMUSP00000025511	ENSMUSP00000031617	ENSMUSP00000035105	ENSMUSP00000038135	ENSMUSP00000048469	ENSMUSP00000054490	ENSMUSP00000058432	ENSMUSP00000069004	ENSMUSP00000071616	ENSMUSP00000073175	ENSMUSP00000077612	ENSMUSP00000079180	ENSMUSP00000079628	ENSMUSP00000080354	ENSMUSP00000080854	ENSMUSP00000086614	ENSMUSP00000099757	ENSMUSP00000099878	ENSMUSP00000102213	ENSMUSP00000103940	ENSMUSP00000104067	ENSMUSP00000110013	ENSMUSP00000110374	ENSMUSP00000110532	ENSMUSP00000110731	ENSMUSP00000125977	ENSMUSP00000127774	ENSMUSP00000131489	C1qbp	Dhx9	Eif4b	Rbmx	Rpl10a	Rpl14	Rpl26	Rpl3	Rpl34	Rpl35a	Rpl38	Rpl5	Rpl6	Rpl7	Rps10
GO:0034641	cellular nitrogen compound metabolic process	85	4247	9.48e-20	ENSMUSP00000000090	ENSMUSP00000000756	ENSMUSP00000003521	ENSMUSP00000004072	ENSMUSP00000004554	ENSMUSP00000006496	ENSMUSP00000007814	ENSMUSP00000008812	ENSMUSP00000011058	ENSMUSP00000016396	ENSMUSP00000017548	ENSMUSP00000019323	ENSMUSP00000022268	ENSMUSP00000023210	ENSMUSP00000023608	ENSMUSP00000023677	ENSMUSP00000025511	ENSMUSP00000026420	ENSMUSP00000029722	ENSMUSP00000031617	ENSMUSP00000031862	ENSMUSP00000032998	ENSMUSP00000034567	ENSMUSP00000034856	ENSMUSP00000034966	ENSMUSP00000035105	ENSMUSP00000038135	ENSMUSP00000038352	ENSMUSP00000046506	ENSMUSP00000047008	ENSMUSP00000047678	ENSMUSP00000048469	ENSMUSP00000051222	ENSMUSP00000053145	ENSMUSP00000054490	ENSMUSP00000054856	ENSMUSP00000058432	ENSMUSP00000058919	ENSMUSP00000060346	ENSMUSP00000069004	ENSMUSP00000071616	ENSMUSP00000073175	ENSMUSP00000076447	ENSMUSP00000076564	ENSMUSP00000077612
GO:0042254	ribosome biogenesis	26	252	1.2e-19	ENSMUSP00000004554	ENSMUSP00000008812	ENSMUSP00000025511	ENSMUSP00000031617	ENSMUSP00000035105	ENSMUSP00000048469	ENSMUSP00000058432	ENSMUSP00000069004	ENSMUSP00000071616	ENSMUSP00000073175	ENSMUSP00000077612	ENSMUSP00000079180	ENSMUSP00000079628	ENSMUSP00000080354	ENSMUSP00000080854	ENSMUSP00000086614	ENSMUSP00000099757	ENSMUSP00000099878	ENSMUSP00000102213	ENSMUSP00000103940	ENSMUSP00000104067	ENSMUSP00000110013	ENSMUSP00000110532	ENSMUSP00000110731	ENSMUSP00000125977	ENSMUSP00000131489	C1qbp	Rpl10a	Rpl14	Rpl26	Rpl3	Rpl34	Rpl35a	Rpl38	Rpl5	Rpl6	Rpl7	Rps10	Rps14	Rps15	Rps16	Rps17	Rps18	Rps19	Rps21
GO:0044249	cellular biosynthetic process	76	3571	1.91e-18	ENSMUSP00000000756	ENSMUSP00000003521	ENSMUSP00000004072	ENSMUSP00000004554	ENSMUSP00000006496	ENSMUSP00000007814	ENSMUSP00000008812	ENSMUSP00000011058	ENSMUSP00000016396	ENSMUSP00000017548	ENSMUSP00000022268	ENSMUSP00000023210	ENSMUSP00000023608	ENSMUSP00000023677	ENSMUSP00000025511	ENSMUSP00000026420	ENSMUSP00000029722	ENSMUSP00000031617	ENSMUSP00000031862	ENSMUSP00000032998	ENSMUSP00000034567	ENSMUSP00000034856	ENSMUSP00000034966	ENSMUSP00000035105	ENSMUSP00000038135	ENSMUSP00000038352	ENSMUSP00000046506	ENSMUSP00000047008	ENSMUSP00000047678	ENSMUSP00000048469	ENSMUSP00000051222	ENSMUSP00000054490	ENSMUSP00000058432	ENSMUSP00000058919	ENSMUSP00000069004	ENSMUSP00000071616	ENSMUSP00000073175	ENSMUSP00000076447	ENSMUSP00000077612	ENSMUSP00000079340	ENSMUSP00000079628	ENSMUSP00000079944	ENSMUSP00000080354	ENSMUSP00000080427	ENSMUSP00000080523
GO:0044260	cellular macromolecule metabolic process	92	5233	3.26e-18	ENSMUSP00000000756	ENSMUSP00000003521	ENSMUSP00000004072	ENSMUSP00000004554	ENSMUSP00000005923	ENSMUSP00000006496	ENSMUSP00000007814	ENSMUSP00000008812	ENSMUSP00000014913	ENSMUSP00000017548	ENSMUSP00000018430	ENSMUSP00000019323	ENSMUSP00000021412	ENSMUSP00000022803	ENSMUSP00000023712	ENSMUSP00000025511	ENSMUSP00000026420	ENSMUSP00000028083	ENSMUSP00000028727	ENSMUSP00000029082	ENSMUSP00000029722	ENSMUSP00000030642	ENSMUSP00000030769	ENSMUSP00000031617	ENSMUSP00000031862	ENSMUSP00000032998	ENSMUSP00000033008	ENSMUSP00000033176	ENSMUSP00000034131	ENSMUSP00000034211	ENSMUSP00000034369	ENSMUSP00000034848	ENSMUSP00000034856	ENSMUSP00000034966	ENSMUSP00000035105	ENSMUSP00000035743	ENSMUSP00000038135	ENSMUSP00000038352	ENSMUSP00000046506	ENSMUSP00000047008	ENSMUSP00000047678	ENSMUSP00000048469	ENSMUSP00000051657	ENSMUSP00000054490	ENSMUSP00000058432
GO:0009058	biosynthetic process	77	3707	3.49e-18	ENSMUSP00000000756	ENSMUSP00000003521	ENSMUSP00000004072	ENSMUSP00000004554	ENSMUSP00000006496	ENSMUSP00000007814	ENSMUSP00000008812	ENSMUSP00000011058	ENSMUSP00000016396	ENSMUSP00000017548	ENSMUSP00000022268	ENSMUSP00000023210	ENSMUSP00000023608	ENSMUSP00000023677	ENSMUSP00000025511	ENSMUSP00000026420	ENSMUSP00000029722	ENSMUSP00000031617	ENSMUSP00000031862	ENSMUSP00000032998	ENSMUSP00000034567	ENSMUSP00000034856	ENSMUSP00000034966	ENSMUSP00000035105	ENSMUSP00000038135	ENSMUSP00000038352	ENSMUSP00000046506	ENSMUSP00000047008	ENSMUSP00000047678	ENSMUSP00000048469	ENSMUSP00000051222	ENSMUSP00000054490	ENSMUSP00000058432	ENSMUSP00000058919	ENSMUSP00000069004	ENSMUSP00000071616	ENSMUSP00000073175	ENSMUSP00000076447	ENSMUSP00000077612	ENSMUSP00000077733	ENSMUSP00000079340	ENSMUSP00000079628	ENSMUSP00000079944	ENSMUSP00000080354	ENSMUSP00000080427
GO:1901576	organic substance biosynthetic process	76	3651	6.26e-18	ENSMUSP00000000756	ENSMUSP00000003521	ENSMUSP00000004072	ENSMUSP00000004554	ENSMUSP00000006496	ENSMUSP00000007814	ENSMUSP00000008812	ENSMUSP00000011058	ENSMUSP00000016396	ENSMUSP00000017548	ENSMUSP00000022268	ENSMUSP00000023210	ENSMUSP00000023608	ENSMUSP00000023677	ENSMUSP00000025511	ENSMUSP00000026420	ENSMUSP00000029722	ENSMUSP00000031617	ENSMUSP00000031862	ENSMUSP00000032998	ENSMUSP00000034567	ENSMUSP00000034856	ENSMUSP00000034966	ENSMUSP00000035105	ENSMUSP00000038135	ENSMUSP00000038352	ENSMUSP00000046506	ENSMUSP00000047008	ENSMUSP00000047678	ENSMUSP00000048469	ENSMUSP00000051222	ENSMUSP00000054490	ENSMUSP00000058432	ENSMUSP00000058919	ENSMUSP00000069004	ENSMUSP00000071616	ENSMUSP00000073175	ENSMUSP00000076447	ENSMUSP00000077612	ENSMUSP00000079340	ENSMUSP00000079628	ENSMUSP00000079944	ENSMUSP00000080354	ENSMUSP00000080427	ENSMUSP00000080523
GO:0042274	ribosomal small subunit biogenesis	15	70	3.46e-15	ENSMUSP00000004554	ENSMUSP00000025511	ENSMUSP00000035105	ENSMUSP00000058432	ENSMUSP00000069004	ENSMUSP00000079180	ENSMUSP00000079628	ENSMUSP00000099757	ENSMUSP00000099878	ENSMUSP00000102213	ENSMUSP00000103940	ENSMUSP00000104067	ENSMUSP00000110013	ENSMUSP00000110532	ENSMUSP00000125977	Rpl38	Rps10	Rps14	Rps15	Rps16	Rps17	Rps19	Rps21	Rps24	Rps25	Rps28	Rps5	Rps6	Rps8	Rpsa
GO:0042255	ribosome assembly	14	59	1.13e-14	ENSMUSP00000004554	ENSMUSP00000025511	ENSMUSP00000031617	ENSMUSP00000035105	ENSMUSP00000069004	ENSMUSP00000077612	ENSMUSP00000079180	ENSMUSP00000079628	ENSMUSP00000080354	ENSMUSP00000080854	ENSMUSP00000102213	ENSMUSP00000104067	ENSMUSP00000110013	ENSMUSP00000110532	C1qbp	Rpl3	Rpl38	Rpl5	Rpl6	Rps10	Rps14	Rps15	Rps17	Rps19	Rps25	Rps28	Rps5	Rpsa
GO:0043170	macromolecule metabolic process	94	6225	3.02e-14	ENSMUSP00000000756	ENSMUSP00000003521	ENSMUSP00000004072	ENSMUSP00000004554	ENSMUSP00000005923	ENSMUSP00000006496	ENSMUSP00000007814	ENSMUSP00000008812	ENSMUSP00000014913	ENSMUSP00000017548	ENSMUSP00000018430	ENSMUSP00000019323	ENSMUSP00000021412	ENSMUSP00000022803	ENSMUSP00000023712	ENSMUSP00000025511	ENSMUSP00000025851	ENSMUSP00000026420	ENSMUSP00000028083	ENSMUSP00000028727	ENSMUSP00000029082	ENSMUSP00000029722	ENSMUSP00000030642	ENSMUSP00000030769	ENSMUSP00000031617	ENSMUSP00000031862	ENSMUSP00000032998	ENSMUSP00000033008	ENSMUSP00000033176	ENSMUSP00000034131	ENSMUSP00000034211	ENSMUSP00000034369	ENSMUSP00000034848	ENSMUSP00000034856	ENSMUSP00000034966	ENSMUSP00000035105	ENSMUSP00000035743	ENSMUSP00000038135	ENSMUSP00000038352	ENSMUSP00000046506	ENSMUSP00000047008	ENSMUSP00000047678	ENSMUSP00000048469	ENSMUSP00000051657	ENSMUSP00000054490
GO:0034645	cellular macromolecule biosynthetic process	60	2778	7.17e-14	ENSMUSP00000000756	ENSMUSP00000003521	ENSMUSP00000004072	ENSMUSP00000004554	ENSMUSP00000006496	ENSMUSP00000007814	ENSMUSP00000008812	ENSMUSP00000017548	ENSMUSP00000025511	ENSMUSP00000026420	ENSMUSP00000029722	ENSMUSP00000031617	ENSMUSP00000031862	ENSMUSP00000032998	ENSMUSP00000034856	ENSMUSP00000034966	ENSMUSP00000035105	ENSMUSP00000038135	ENSMUSP00000038352	ENSMUSP00000046506	ENSMUSP00000047008	ENSMUSP00000047678	ENSMUSP00000048469	ENSMUSP00000054490	ENSMUSP00000058432	ENSMUSP00000058919	ENSMUSP00000069004	ENSMUSP00000071616	ENSMUSP00000073175	ENSMUSP00000076447	ENSMUSP00000077612	ENSMUSP00000079340	ENSMUSP00000079628	ENSMUSP00000080354	ENSMUSP00000080427	ENSMUSP00000080523	ENSMUSP00000080854	ENSMUSP00000081474	ENSMUSP00000086614	ENSMUSP00000099435	ENSMUSP00000099757	ENSMUSP00000099878	ENSMUSP00000099909	ENSMUSP00000102213	ENSMUSP00000103365
GO:0010467	gene expression	62	3013	1.65e-13	ENSMUSP00000000756	ENSMUSP00000003521	ENSMUSP00000004072	ENSMUSP00000004554	ENSMUSP00000006496	ENSMUSP00000007814	ENSMUSP00000008812	ENSMUSP00000017548	ENSMUSP00000025511	ENSMUSP00000026420	ENSMUSP00000029722	ENSMUSP00000031617	ENSMUSP00000031862	ENSMUSP00000032998	ENSMUSP00000033176	ENSMUSP00000034131	ENSMUSP00000034966	ENSMUSP00000035105	ENSMUSP00000038135	ENSMUSP00000038352	ENSMUSP00000046506	ENSMUSP00000047008	ENSMUSP00000047678	ENSMUSP00000048469	ENSMUSP00000054490	ENSMUSP00000058432	ENSMUSP00000058919	ENSMUSP00000069004	ENSMUSP00000071616	ENSMUSP00000073175	ENSMUSP00000076447	ENSMUSP00000077612	ENSMUSP00000077733	ENSMUSP00000079340	ENSMUSP00000079628	ENSMUSP00000080354	ENSMUSP00000080427	ENSMUSP00000080523	ENSMUSP00000080854	ENSMUSP00000081474	ENSMUSP00000086614	ENSMUSP00000099435	ENSMUSP00000099757	ENSMUSP00000099878	ENSMUSP00000099909
GO:0000028	ribosomal small subunit assembly	10	19	3.44e-13	ENSMUSP00000004554	ENSMUSP00000025511	ENSMUSP00000035105	ENSMUSP00000069004	ENSMUSP00000079180	ENSMUSP00000079628	ENSMUSP00000102213	ENSMUSP00000104067	ENSMUSP00000110013	ENSMUSP00000110532	Rpl38	Rps10	Rps14	Rps15	Rps17	Rps19	Rps25	Rps28	Rps5	Rpsa
GO:0017144	drug metabolic process	26	494	3.82e-13	ENSMUSP00000000090	ENSMUSP00000016396	ENSMUSP00000019323	ENSMUSP00000022268	ENSMUSP00000022573	ENSMUSP00000023210	ENSMUSP00000023608	ENSMUSP00000023677	ENSMUSP00000034567	ENSMUSP00000034856	ENSMUSP00000051222	ENSMUSP00000053145	ENSMUSP00000054856	ENSMUSP00000060346	ENSMUSP00000077744	ENSMUSP00000079944	ENSMUSP00000084846	ENSMUSP00000100045	ENSMUSP00000101006	ENSMUSP00000106481	ENSMUSP00000113022	ENSMUSP00000115419	ENSMUSP00000121358	ENSMUSP00000125504	ENSMUSP00000129704	ENSMUSP00000130898	Akr1b3	Aldoa	Atp5d	Atp5e	Atp5f1	Atp5j	Atp5j2	Atp5k	Atp5o	Cox5a	Cox5b	Cox7c	Cyc1	Dlat	Dld	Dlst	Enoph1	Esd	Ide
GO:0006091	generation of precursor metabolites and energy	21	295	7.7e-13	ENSMUSP00000000090	ENSMUSP00000014457	ENSMUSP00000019323	ENSMUSP00000022268	ENSMUSP00000023210	ENSMUSP00000023677	ENSMUSP00000031637	ENSMUSP00000034211	ENSMUSP00000034567	ENSMUSP00000034856	ENSMUSP00000035743	ENSMUSP00000045284	ENSMUSP00000047968	ENSMUSP00000053145	ENSMUSP00000054856	ENSMUSP00000060346	ENSMUSP00000077744	ENSMUSP00000079944	ENSMUSP00000084846	ENSMUSP00000106481	ENSMUSP00000115419	Aldoa	Atp5o	Cox5a	Cox5b	Cox6c	Cox7c	Cyc1	Dlat	Dld	Dlst	Mdh2	Mpi	Mt3	Ndufa4	Pdhb	Pygb	S100b	Uqcr10	Uqcrfs1	Uqcrh	Uqcrq
GO:0022618	ribonucleoprotein complex assembly	18	192	8.32e-13	ENSMUSP00000004554	ENSMUSP00000025511	ENSMUSP00000031617	ENSMUSP00000035105	ENSMUSP00000038135	ENSMUSP00000054490	ENSMUSP00000069004	ENSMUSP00000077612	ENSMUSP00000079180	ENSMUSP00000079628	ENSMUSP00000080354	ENSMUSP00000080854	ENSMUSP00000102213	ENSMUSP00000104067	ENSMUSP00000110013	ENSMUSP00000110374	ENSMUSP00000110532	ENSMUSP00000127774	C1qbp	Dhx9	Eif4b	Rbmx	Rpl3	Rpl38	Rpl5	Rpl6	Rps10	Rps14	Rps15	Rps17	Rps19	Rps23	Rps25	Rps28	Rps5	Rpsa
GO:0046034	ATP metabolic process	17	162	8.32e-13	ENSMUSP00000000090	ENSMUSP00000016396	ENSMUSP00000023210	ENSMUSP00000023608	ENSMUSP00000023677	ENSMUSP00000034856	ENSMUSP00000051222	ENSMUSP00000053145	ENSMUSP00000054856	ENSMUSP00000077744	ENSMUSP00000079944	ENSMUSP00000084846	ENSMUSP00000101006	ENSMUSP00000106481	ENSMUSP00000113022	ENSMUSP00000115419	ENSMUSP00000125504	Aldoa	Atp5d	Atp5e	Atp5f1	Atp5j	Atp5j2	Atp5k	Atp5o	Cox5a	Cox5b	Cox7c	Cyc1	Dld	Mpi	Uqcr10	Uqcrh	Uqcrq
GO:0009167	purine ribonucleoside monophosphate metabolic process	18	196	1.09e-12	ENSMUSP00000000090	ENSMUSP00000016396	ENSMUSP00000023210	ENSMUSP00000023608	ENSMUSP00000023677	ENSMUSP00000034856	ENSMUSP00000051222	ENSMUSP00000053145	ENSMUSP00000054856	ENSMUSP00000077744	ENSMUSP00000079944	ENSMUSP00000084846	ENSMUSP00000101006	ENSMUSP00000106481	ENSMUSP00000113022	ENSMUSP00000115419	ENSMUSP00000125504	ENSMUSP00000130898	Aldoa	Atp5d	Atp5e	Atp5f1	Atp5j	Atp5j2	Atp5k	Atp5o	Cox5a	Cox5b	Cox7c	Cyc1	Dld	Mpi	Nt5c2	Uqcr10	Uqcrh	Uqcrq
GO:0009150	purine ribonucleotide metabolic process	22	356	2.21e-12	ENSMUSP00000000090	ENSMUSP00000011058	ENSMUSP00000016396	ENSMUSP00000022268	ENSMUSP00000023210	ENSMUSP00000023608	ENSMUSP00000023677	ENSMUSP00000034567	ENSMUSP00000034856	ENSMUSP00000051222	ENSMUSP00000053145	ENSMUSP00000054856	ENSMUSP00000060346	ENSMUSP00000077744	ENSMUSP00000079944	ENSMUSP00000084846	ENSMUSP00000101006	ENSMUSP00000106481	ENSMUSP00000113022	ENSMUSP00000115419	ENSMUSP00000125504	ENSMUSP00000130898	Aldoa	Atp5d	Atp5e	Atp5f1	Atp5j	Atp5j2	Atp5k	Atp5o	Cox5a	Cox5b	Cox7c	Cyc1	Dlat	Dld	Dlst	Mpi	Nt5c2	Pdhb	Pdhx	Uqcr10	Uqcrh	Uqcrq
GO:0006364	rRNA processing	17	176	2.49e-12	ENSMUSP00000025511	ENSMUSP00000035105	ENSMUSP00000048469	ENSMUSP00000058432	ENSMUSP00000069004	ENSMUSP00000071616	ENSMUSP00000073175	ENSMUSP00000079628	ENSMUSP00000080854	ENSMUSP00000099757	ENSMUSP00000099878	ENSMUSP00000103940	ENSMUSP00000104067	ENSMUSP00000110013	ENSMUSP00000110731	ENSMUSP00000125977	ENSMUSP00000131489	Rpl10a	Rpl14	Rpl26	Rpl35a	Rpl5	Rpl7	Rps14	Rps15	Rps16	Rps17	Rps19	Rps21	Rps24	Rps28	Rps6	Rps8	Rpsa
GO:0009152	purine ribonucleotide biosynthetic process	15	154	5.87e-11	ENSMUSP00000011058	ENSMUSP00000016396	ENSMUSP00000022268	ENSMUSP00000023210	ENSMUSP00000023608	ENSMUSP00000023677	ENSMUSP00000034567	ENSMUSP00000034856	ENSMUSP00000051222	ENSMUSP00000079944	ENSMUSP00000084846	ENSMUSP00000101006	ENSMUSP00000106481	ENSMUSP00000113022	ENSMUSP00000125504	Aldoa	Atp5d	Atp5e	Atp5f1	Atp5j	Atp5j2	Atp5k	Atp5o	Cox5b	Cyc1	Dlat	Dld	Mpi	Pdhb	Pdhx
GO:0009117	nucleotide metabolic process	23	488	8.77e-11	ENSMUSP00000000090	ENSMUSP00000011058	ENSMUSP00000016396	ENSMUSP00000019323	ENSMUSP00000022268	ENSMUSP00000023210	ENSMUSP00000023608	ENSMUSP00000023677	ENSMUSP00000034567	ENSMUSP00000034856	ENSMUSP00000051222	ENSMUSP00000053145	ENSMUSP00000054856	ENSMUSP00000060346	ENSMUSP00000077744	ENSMUSP00000079944	ENSMUSP00000084846	ENSMUSP00000101006	ENSMUSP00000106481	ENSMUSP00000113022	ENSMUSP00000115419	ENSMUSP00000125504	ENSMUSP00000130898	Aldoa	Atp5d	Atp5e	Atp5f1	Atp5j	Atp5j2	Atp5k	Atp5o	Cox5a	Cox5b	Cox7c	Cyc1	Dlat	Dld	Dlst	Mdh2	Mpi	Nt5c2	Pdhb	Pdhx	Uqcr10	Uqcrh
GO:1902600	proton transmembrane transport	13	113	2.52e-10	ENSMUSP00000000090	ENSMUSP00000014457	ENSMUSP00000016396	ENSMUSP00000023210	ENSMUSP00000023608	ENSMUSP00000023677	ENSMUSP00000031637	ENSMUSP00000051222	ENSMUSP00000079944	ENSMUSP00000101006	ENSMUSP00000104906	ENSMUSP00000113022	ENSMUSP00000115419	Atp5d	Atp5e	Atp5f1	Atp5j	Atp5k	Atp5o	Cox5a	Cox5b	Cox6c	Cox7c	Cyc1	Ndufa4	Slc2a13
GO:0034622	cellular protein-containing complex assembly	26	687	2.87e-10	ENSMUSP00000004554	ENSMUSP00000005509	ENSMUSP00000021273	ENSMUSP00000025511	ENSMUSP00000028727	ENSMUSP00000030212	ENSMUSP00000031617	ENSMUSP00000035105	ENSMUSP00000038135	ENSMUSP00000038781	ENSMUSP00000051657	ENSMUSP00000054490	ENSMUSP00000054856	ENSMUSP00000069004	ENSMUSP00000077612	ENSMUSP00000079180	ENSMUSP00000079628	ENSMUSP00000080354	ENSMUSP00000080854	ENSMUSP00000102213	ENSMUSP00000104067	ENSMUSP00000110013	ENSMUSP00000110374	ENSMUSP00000110532	ENSMUSP00000124509	ENSMUSP00000127774	C1qbp	Dhx9	Eif4b	H3f3a	Psmd8	Rbmx	Rpl3	Rpl38	Rpl5	Rpl6	Rps10	Rps14	Rps15	Rps17	Rps19	Rps23	Rps25	Rps28	Rps5
GO:0006754	ATP biosynthetic process	11	70	5.17e-10	ENSMUSP00000016396	ENSMUSP00000023210	ENSMUSP00000023608	ENSMUSP00000023677	ENSMUSP00000034856	ENSMUSP00000051222	ENSMUSP00000079944	ENSMUSP00000084846	ENSMUSP00000101006	ENSMUSP00000113022	ENSMUSP00000125504	Aldoa	Atp5d	Atp5e	Atp5f1	Atp5j	Atp5j2	Atp5k	Atp5o	Cox5b	Cyc1	Mpi
GO:0044085	cellular component biogenesis	46	2213	9.61e-10	ENSMUSP00000004554	ENSMUSP00000005509	ENSMUSP00000008812	ENSMUSP00000021273	ENSMUSP00000025511	ENSMUSP00000028727	ENSMUSP00000030212	ENSMUSP00000031617	ENSMUSP00000032998	ENSMUSP00000034856	ENSMUSP00000035105	ENSMUSP00000038135	ENSMUSP00000038781	ENSMUSP00000048469	ENSMUSP00000051657	ENSMUSP00000054490	ENSMUSP00000054856	ENSMUSP00000058432	ENSMUSP00000069004	ENSMUSP00000071616	ENSMUSP00000073175	ENSMUSP00000077612	ENSMUSP00000077733	ENSMUSP00000077744	ENSMUSP00000079180	ENSMUSP00000079628	ENSMUSP00000080354	ENSMUSP00000080854	ENSMUSP00000084846	ENSMUSP00000086614	ENSMUSP00000099757	ENSMUSP00000099878	ENSMUSP00000099902	ENSMUSP00000100912	ENSMUSP00000102213	ENSMUSP00000103940	ENSMUSP00000104067	ENSMUSP00000110013	ENSMUSP00000110374	ENSMUSP00000110532	ENSMUSP00000110731	ENSMUSP00000121358	ENSMUSP00000124509	ENSMUSP00000125977	ENSMUSP00000127774
GO:0015980	energy derivation by oxidation of organic compounds	15	197	1.28e-09	ENSMUSP00000000090	ENSMUSP00000019323	ENSMUSP00000022268	ENSMUSP00000023210	ENSMUSP00000034211	ENSMUSP00000034567	ENSMUSP00000035743	ENSMUSP00000047968	ENSMUSP00000053145	ENSMUSP00000054856	ENSMUSP00000060346	ENSMUSP00000077744	ENSMUSP00000079944	ENSMUSP00000106481	ENSMUSP00000115419	Cox5a	Cox5b	Cox7c	Cyc1	Dlat	Dld	Dlst	Mdh2	Mt3	Pdhb	Pygb	S100b	Uqcr10	Uqcrh	Uqcrq
GO:0015986	ATP synthesis coupled proton transport	8	23	1.39e-09	ENSMUSP00000016396	ENSMUSP00000023210	ENSMUSP00000023608	ENSMUSP00000023677	ENSMUSP00000051222	ENSMUSP00000079944	ENSMUSP00000101006	ENSMUSP00000113022	Atp5d	Atp5e	Atp5f1	Atp5j	Atp5k	Atp5o	Cox5b	Cyc1
GO:0009168	purine ribonucleoside monophosphate biosynthetic process	11	91	5.82e-09	ENSMUSP00000016396	ENSMUSP00000023210	ENSMUSP00000023608	ENSMUSP00000023677	ENSMUSP00000034856	ENSMUSP00000051222	ENSMUSP00000079944	ENSMUSP00000084846	ENSMUSP00000101006	ENSMUSP00000113022	ENSMUSP00000125504	Aldoa	Atp5d	Atp5e	Atp5f1	Atp5j	Atp5j2	Atp5k	Atp5o	Cox5b	Cyc1	Mpi
GO:0051603	proteolysis involved in cellular protein catabolic process	20	473	1.22e-08	ENSMUSP00000005923	ENSMUSP00000014913	ENSMUSP00000018430	ENSMUSP00000021412	ENSMUSP00000022803	ENSMUSP00000028083	ENSMUSP00000029082	ENSMUSP00000030642	ENSMUSP00000030769	ENSMUSP00000033008	ENSMUSP00000034369	ENSMUSP00000034848	ENSMUSP00000051657	ENSMUSP00000071054	ENSMUSP00000088057	ENSMUSP00000099436	ENSMUSP00000121358	ENSMUSP00000125548	ENSMUSP00000129767	ENSMUSP00000133499	Ide	Psma1	Psma2	Psma3	Psma4	Psma5	Psma6	Psma7	Psmb1	Psmb10	Psmb2	Psmb3	Psmb4	Psmb5	Psmb6	Psmb7	Psmb9	Psmc2	Psmc3	Psmd8
GO:0045333	cellular respiration	12	140	2.89e-08	ENSMUSP00000000090	ENSMUSP00000019323	ENSMUSP00000022268	ENSMUSP00000023210	ENSMUSP00000034567	ENSMUSP00000053145	ENSMUSP00000054856	ENSMUSP00000060346	ENSMUSP00000077744	ENSMUSP00000079944	ENSMUSP00000106481	ENSMUSP00000115419	Cox5a	Cox5b	Cox7c	Cyc1	Dlat	Dld	Dlst	Mdh2	Pdhb	Uqcr10	Uqcrh	Uqcrq
GO:0034660	ncRNA metabolic process	18	411	5.27e-08	ENSMUSP00000007814	ENSMUSP00000025511	ENSMUSP00000035105	ENSMUSP00000048469	ENSMUSP00000058432	ENSMUSP00000069004	ENSMUSP00000071616	ENSMUSP00000073175	ENSMUSP00000079628	ENSMUSP00000080854	ENSMUSP00000099757	ENSMUSP00000099878	ENSMUSP00000103940	ENSMUSP00000104067	ENSMUSP00000110013	ENSMUSP00000110731	ENSMUSP00000125977	ENSMUSP00000131489	Khsrp	Rpl10a	Rpl14	Rpl26	Rpl35a	Rpl5	Rpl7	Rps14	Rps15	Rps16	Rps17	Rps19	Rps21	Rps24	Rps28	Rps6	Rps8	Rpsa
GO:0006119	oxidative phosphorylation	9	63	6.3e-08	ENSMUSP00000000090	ENSMUSP00000023210	ENSMUSP00000023677	ENSMUSP00000053145	ENSMUSP00000054856	ENSMUSP00000077744	ENSMUSP00000079944	ENSMUSP00000106481	ENSMUSP00000115419	Atp5o	Cox5a	Cox5b	Cox7c	Cyc1	Dld	Uqcr10	Uqcrh	Uqcrq
GO:0019637	organophosphate metabolic process	24	775	7.13e-08	ENSMUSP00000000090	ENSMUSP00000011058	ENSMUSP00000016396	ENSMUSP00000019323	ENSMUSP00000022268	ENSMUSP00000023210	ENSMUSP00000023608	ENSMUSP00000023677	ENSMUSP00000034567	ENSMUSP00000034856	ENSMUSP00000051222	ENSMUSP00000053145	ENSMUSP00000054856	ENSMUSP00000060346	ENSMUSP00000077744	ENSMUSP00000079944	ENSMUSP00000084846	ENSMUSP00000101006	ENSMUSP00000106481	ENSMUSP00000113022	ENSMUSP00000114705	ENSMUSP00000115419	ENSMUSP00000125504	ENSMUSP00000130898	Aldoa	Atp5d	Atp5e	Atp5f1	Atp5j	Atp5j2	Atp5k	Atp5o	Cox5a	Cox5b	Cox7c	Cyc1	Dbi	Dlat	Dld	Dlst	Mdh2	Mpi	Nt5c2	Pdhb	Pdhx
GO:0022900	electron transport chain	11	120	7.24e-08	ENSMUSP00000000090	ENSMUSP00000014457	ENSMUSP00000023210	ENSMUSP00000031637	ENSMUSP00000045284	ENSMUSP00000053145	ENSMUSP00000054856	ENSMUSP00000077744	ENSMUSP00000079944	ENSMUSP00000106481	ENSMUSP00000115419	Cox5a	Cox5b	Cox6c	Cox7c	Cyc1	Dld	Ndufa4	Uqcr10	Uqcrfs1	Uqcrh	Uqcrq
GO:1901575	organic substance catabolic process	31	1276	7.63e-08	ENSMUSP00000005923	ENSMUSP00000007814	ENSMUSP00000014913	ENSMUSP00000018430	ENSMUSP00000021412	ENSMUSP00000022573	ENSMUSP00000022803	ENSMUSP00000028083	ENSMUSP00000029082	ENSMUSP00000030642	ENSMUSP00000030769	ENSMUSP00000033008	ENSMUSP00000034211	ENSMUSP00000034369	ENSMUSP00000034848	ENSMUSP00000034856	ENSMUSP00000035743	ENSMUSP00000051657	ENSMUSP00000060346	ENSMUSP00000071054	ENSMUSP00000076564	ENSMUSP00000077733	ENSMUSP00000084846	ENSMUSP00000088057	ENSMUSP00000099436	ENSMUSP00000110434	ENSMUSP00000120976	ENSMUSP00000121358	ENSMUSP00000125548	ENSMUSP00000129767	ENSMUSP00000133499	Aldoa	Dhps	Dlst	Esd	Hadha	Hadhb	Ide	Khsrp	Mpi	Mt3	Psma1	Psma2	Psma3	Psma4
GO:0071840	cellular component organization or biogenesis	67	4730	8.75e-08	ENSMUSP00000004554	ENSMUSP00000005509	ENSMUSP00000008812	ENSMUSP00000021273	ENSMUSP00000022629	ENSMUSP00000023062	ENSMUSP00000023712	ENSMUSP00000025511	ENSMUSP00000028727	ENSMUSP00000029699	ENSMUSP00000030212	ENSMUSP00000030636	ENSMUSP00000031617	ENSMUSP00000031862	ENSMUSP00000032998	ENSMUSP00000033176	ENSMUSP00000034131	ENSMUSP00000034211	ENSMUSP00000034369	ENSMUSP00000034856	ENSMUSP00000034966	ENSMUSP00000035105	ENSMUSP00000036907	ENSMUSP00000038135	ENSMUSP00000038781	ENSMUSP00000039633	ENSMUSP00000047678	ENSMUSP00000048469	ENSMUSP00000051033	ENSMUSP00000051657	ENSMUSP00000054490	ENSMUSP00000054856	ENSMUSP00000058432	ENSMUSP00000069004	ENSMUSP00000071616	ENSMUSP00000073175	ENSMUSP00000077612	ENSMUSP00000077733	ENSMUSP00000077744	ENSMUSP00000079180	ENSMUSP00000079628	ENSMUSP00000080354	ENSMUSP00000080427	ENSMUSP00000080854	ENSMUSP00000084846
GO:0065003	protein-containing complex assembly	31	1292	9.84e-08	ENSMUSP00000004554	ENSMUSP00000005509	ENSMUSP00000021273	ENSMUSP00000025511	ENSMUSP00000028727	ENSMUSP00000030212	ENSMUSP00000031617	ENSMUSP00000035105	ENSMUSP00000038135	ENSMUSP00000038781	ENSMUSP00000051657	ENSMUSP00000054490	ENSMUSP00000054856	ENSMUSP00000069004	ENSMUSP00000077612	ENSMUSP00000077733	ENSMUSP00000077744	ENSMUSP00000079180	ENSMUSP00000079628	ENSMUSP00000080354	ENSMUSP00000080854	ENSMUSP00000084846	ENSMUSP00000100912	ENSMUSP00000102213	ENSMUSP00000104067	ENSMUSP00000110013	ENSMUSP00000110374	ENSMUSP00000110532	ENSMUSP00000121358	ENSMUSP00000124509	ENSMUSP00000127774	Aldoa	C1qbp	Dhps	Dhx9	Eif4b	H3f3a	Ide	Psmd8	Rbmx	Rpl3	Rpl38	Rpl5	Rpl6	Rps10
GO:0043933	protein-containing complex subunit organization	33	1453	1.05e-07	ENSMUSP00000004554	ENSMUSP00000005509	ENSMUSP00000021273	ENSMUSP00000025511	ENSMUSP00000028727	ENSMUSP00000030212	ENSMUSP00000030636	ENSMUSP00000031617	ENSMUSP00000035105	ENSMUSP00000038135	ENSMUSP00000038781	ENSMUSP00000051657	ENSMUSP00000054490	ENSMUSP00000054856	ENSMUSP00000069004	ENSMUSP00000077612	ENSMUSP00000077733	ENSMUSP00000077744	ENSMUSP00000079180	ENSMUSP00000079628	ENSMUSP00000080354	ENSMUSP00000080854	ENSMUSP00000084846	ENSMUSP00000099435	ENSMUSP00000100912	ENSMUSP00000102213	ENSMUSP00000104067	ENSMUSP00000110013	ENSMUSP00000110374	ENSMUSP00000110532	ENSMUSP00000121358	ENSMUSP00000124509	ENSMUSP00000127774	Aldoa	C1qbp	Dhps	Dhx9	Eif4b	H3f3a	Ide	Psmd8	Rbmx	Rpl23	Rpl3	Rpl38
GO:0042273	ribosomal large subunit biogenesis	9	68	1.06e-07	ENSMUSP00000031617	ENSMUSP00000048469	ENSMUSP00000071616	ENSMUSP00000073175	ENSMUSP00000080354	ENSMUSP00000080854	ENSMUSP00000102213	ENSMUSP00000110731	ENSMUSP00000131489	Rpl10a	Rpl14	Rpl26	Rpl3	Rpl35a	Rpl38	Rpl5	Rpl6	Rpl7
GO:0009060	aerobic respiration	9	71	1.47e-07	ENSMUSP00000000090	ENSMUSP00000019323	ENSMUSP00000022268	ENSMUSP00000034567	ENSMUSP00000054856	ENSMUSP00000060346	ENSMUSP00000077744	ENSMUSP00000079944	ENSMUSP00000115419	Cox5a	Cox5b	Cox7c	Dlat	Dlst	Mdh2	Pdhb	Uqcr10	Uqcrh
GO:0030490	maturation of SSU-rRNA	8	51	2.33e-07	ENSMUSP00000025511	ENSMUSP00000035105	ENSMUSP00000058432	ENSMUSP00000099757	ENSMUSP00000103940	ENSMUSP00000104067	ENSMUSP00000110013	ENSMUSP00000125977	Rps14	Rps16	Rps19	Rps21	Rps24	Rps28	Rps8	Rpsa
GO:0042775	mitochondrial ATP synthesis coupled electron transport	8	51	2.33e-07	ENSMUSP00000000090	ENSMUSP00000023210	ENSMUSP00000053145	ENSMUSP00000054856	ENSMUSP00000077744	ENSMUSP00000079944	ENSMUSP00000106481	ENSMUSP00000115419	Cox5a	Cox5b	Cox7c	Cyc1	Dld	Uqcr10	Uqcrh	Uqcrq
GO:0000462	maturation of SSU-rRNA from tricistronic rRNA transcript (SSU-rRNA	5.8S rRNA	LSU-rRNA)	7	33	3.15e-07	ENSMUSP00000025511	ENSMUSP00000035105	ENSMUSP00000058432	ENSMUSP00000099757	ENSMUSP00000103940	ENSMUSP00000104067	ENSMUSP00000125977	Rps14	Rps16	Rps19	Rps21	Rps24	Rps8	Rpsa
GO:0044265	cellular macromolecule catabolic process	21	654	3.74e-07	ENSMUSP00000005923	ENSMUSP00000007814	ENSMUSP00000014913	ENSMUSP00000018430	ENSMUSP00000021412	ENSMUSP00000022803	ENSMUSP00000028083	ENSMUSP00000029082	ENSMUSP00000030642	ENSMUSP00000030769	ENSMUSP00000033008	ENSMUSP00000034369	ENSMUSP00000034848	ENSMUSP00000051657	ENSMUSP00000071054	ENSMUSP00000088057	ENSMUSP00000099436	ENSMUSP00000121358	ENSMUSP00000125548	ENSMUSP00000129767	ENSMUSP00000133499	Ide	Khsrp	Psma1	Psma2	Psma3	Psma4	Psma5	Psma6	Psma7	Psmb1	Psmb10	Psmb2	Psmb3	Psmb4	Psmb5	Psmb6	Psmb7	Psmb9	Psmc2	Psmc3	Psmd8
GO:1901565	organonitrogen compound catabolic process	23	790	4.19e-07	ENSMUSP00000005923	ENSMUSP00000014913	ENSMUSP00000018430	ENSMUSP00000021412	ENSMUSP00000022803	ENSMUSP00000028083	ENSMUSP00000029082	ENSMUSP00000030642	ENSMUSP00000030769	ENSMUSP00000033008	ENSMUSP00000034369	ENSMUSP00000034848	ENSMUSP00000051657	ENSMUSP00000060346	ENSMUSP00000071054	ENSMUSP00000076564	ENSMUSP00000077733	ENSMUSP00000088057	ENSMUSP00000099436	ENSMUSP00000121358	ENSMUSP00000125548	ENSMUSP00000129767	ENSMUSP00000133499	Dhps	Dlst	Ide	Psma1	Psma2	Psma3	Psma4	Psma5	Psma6	Psma7	Psmb1	Psmb10	Psmb2	Psmb3	Psmb4	Psmb5	Psmb6	Psmb7	Psmb9	Psmc2	Psmc3	Psmd8
GO:0009057	macromolecule catabolic process	22	734	5.27e-07	ENSMUSP00000005923	ENSMUSP00000007814	ENSMUSP00000014913	ENSMUSP00000018430	ENSMUSP00000021412	ENSMUSP00000022803	ENSMUSP00000028083	ENSMUSP00000029082	ENSMUSP00000030642	ENSMUSP00000030769	ENSMUSP00000033008	ENSMUSP00000034369	ENSMUSP00000034848	ENSMUSP00000035743	ENSMUSP00000051657	ENSMUSP00000071054	ENSMUSP00000088057	ENSMUSP00000099436	ENSMUSP00000121358	ENSMUSP00000125548	ENSMUSP00000129767	ENSMUSP00000133499	Ide	Khsrp	Psma1	Psma2	Psma3	Psma4	Psma5	Psma6	Psma7	Psmb1	Psmb10	Psmb2	Psmb3	Psmb4	Psmb5	Psmb6	Psmb7	Psmb9	Psmc2	Psmc3	Psmd8	Pygb
GO:0044248	cellular catabolic process	30	1321	5.51e-07	ENSMUSP00000005923	ENSMUSP00000007814	ENSMUSP00000014913	ENSMUSP00000018430	ENSMUSP00000021412	ENSMUSP00000022573	ENSMUSP00000022803	ENSMUSP00000028083	ENSMUSP00000029082	ENSMUSP00000030642	ENSMUSP00000030769	ENSMUSP00000033008	ENSMUSP00000034211	ENSMUSP00000034369	ENSMUSP00000034848	ENSMUSP00000034856	ENSMUSP00000035743	ENSMUSP00000051657	ENSMUSP00000060346	ENSMUSP00000071054	ENSMUSP00000076564	ENSMUSP00000084846	ENSMUSP00000088057	ENSMUSP00000099436	ENSMUSP00000110434	ENSMUSP00000120976	ENSMUSP00000121358	ENSMUSP00000125548	ENSMUSP00000129767	ENSMUSP00000133499	Aldoa	Dlst	Esd	Hadha	Hadhb	Ide	Khsrp	Mpi	Mt3	Psma1	Psma2	Psma3	Psma4	Psma5	Psma6
GO:0006508	proteolysis	26	1024	6.39e-07	ENSMUSP00000005923	ENSMUSP00000014913	ENSMUSP00000018430	ENSMUSP00000021412	ENSMUSP00000022803	ENSMUSP00000025851	ENSMUSP00000028083	ENSMUSP00000029082	ENSMUSP00000030642	ENSMUSP00000030769	ENSMUSP00000033008	ENSMUSP00000033176	ENSMUSP00000034131	ENSMUSP00000034369	ENSMUSP00000034848	ENSMUSP00000051657	ENSMUSP00000071054	ENSMUSP00000076564	ENSMUSP00000088057	ENSMUSP00000099436	ENSMUSP00000106481	ENSMUSP00000110374	ENSMUSP00000121358	ENSMUSP00000125548	ENSMUSP00000129767	ENSMUSP00000133499	Dld	Dpp3	Ide	Psma1	Psma2	Psma3	Psma4	Psma5	Psma6	Psma7	Psmb1	Psmb10	Psmb2	Psmb3	Psmb4	Psmb5	Psmb6	Psmb7	Psmb9
GO:1901135	carbohydrate derivative metabolic process	24	882	6.58e-07	ENSMUSP00000000090	ENSMUSP00000011058	ENSMUSP00000016396	ENSMUSP00000022268	ENSMUSP00000023210	ENSMUSP00000023608	ENSMUSP00000023677	ENSMUSP00000034567	ENSMUSP00000034856	ENSMUSP00000051222	ENSMUSP00000053145	ENSMUSP00000054856	ENSMUSP00000060346	ENSMUSP00000077744	ENSMUSP00000079944	ENSMUSP00000084846	ENSMUSP00000100045	ENSMUSP00000101006	ENSMUSP00000106481	ENSMUSP00000113022	ENSMUSP00000113115	ENSMUSP00000115419	ENSMUSP00000125504	ENSMUSP00000130898	Akr1b3	Aldoa	Atp5d	Atp5e	Atp5f1	Atp5j	Atp5j2	Atp5k	Atp5o	Cox5a	Cox5b	Cox7c	Cyc1	Dlat	Dld	Dlst	Mpi	Nt5c2	Pdhb	Pdhx	Spock2
GO:0055114	oxidation-reduction process	24	898	9.06e-07	ENSMUSP00000000090	ENSMUSP00000011058	ENSMUSP00000014457	ENSMUSP00000019323	ENSMUSP00000022268	ENSMUSP00000023210	ENSMUSP00000031637	ENSMUSP00000033176	ENSMUSP00000034211	ENSMUSP00000034567	ENSMUSP00000035743	ENSMUSP00000045284	ENSMUSP00000047968	ENSMUSP00000052912	ENSMUSP00000053145	ENSMUSP00000054856	ENSMUSP00000060346	ENSMUSP00000077744	ENSMUSP00000079944	ENSMUSP00000100045	ENSMUSP00000106481	ENSMUSP00000110434	ENSMUSP00000115419	ENSMUSP00000120976	Akr1b3	Cox5a	Cox5b	Cox6c	Cox7c	Cyc1	Dlat	Dld	Dlst	Hadha	Hadhb	Mdh2	Mt3	Ndufa4	Pdhb	Pdhx	Pdia6	Pygb	S100b	Uqcr10	Uqcrc2
GO:0006396	RNA processing	21	715	1.51e-06	ENSMUSP00000007814	ENSMUSP00000025511	ENSMUSP00000035105	ENSMUSP00000038135	ENSMUSP00000048469	ENSMUSP00000058432	ENSMUSP00000069004	ENSMUSP00000071616	ENSMUSP00000073175	ENSMUSP00000077612	ENSMUSP00000079628	ENSMUSP00000080854	ENSMUSP00000099757	ENSMUSP00000099878	ENSMUSP00000103940	ENSMUSP00000104067	ENSMUSP00000110013	ENSMUSP00000110374	ENSMUSP00000110731	ENSMUSP00000125977	ENSMUSP00000131489	C1qbp	Dhx9	Khsrp	Rbmx	Rpl10a	Rpl14	Rpl26	Rpl35a	Rpl5	Rpl7	Rps14	Rps15	Rps16	Rps17	Rps19	Rps21	Rps24	Rps28	Rps6	Rps8	Rpsa
GO:0044281	small molecule metabolic process	30	1489	6.61e-06	ENSMUSP00000000090	ENSMUSP00000011058	ENSMUSP00000016396	ENSMUSP00000019323	ENSMUSP00000022268	ENSMUSP00000022573	ENSMUSP00000023210	ENSMUSP00000023608	ENSMUSP00000023677	ENSMUSP00000034211	ENSMUSP00000034567	ENSMUSP00000034856	ENSMUSP00000051222	ENSMUSP00000053145	ENSMUSP00000054856	ENSMUSP00000060346	ENSMUSP00000077744	ENSMUSP00000079944	ENSMUSP00000084846	ENSMUSP00000100045	ENSMUSP00000101006	ENSMUSP00000106481	ENSMUSP00000110434	ENSMUSP00000113022	ENSMUSP00000113115	ENSMUSP00000115419	ENSMUSP00000120976	ENSMUSP00000125504	ENSMUSP00000129704	ENSMUSP00000130898	Akr1b3	Aldoa	Atp5d	Atp5e	Atp5f1	Atp5j	Atp5j2	Atp5k	Atp5o	Cox5a	Cox5b	Cox7c	Cyc1	Dlat	Dld
GO:0015672	monovalent inorganic cation transport	14	380	2.05e-05	ENSMUSP00000000090	ENSMUSP00000014457	ENSMUSP00000016396	ENSMUSP00000023210	ENSMUSP00000023608	ENSMUSP00000023677	ENSMUSP00000028727	ENSMUSP00000031637	ENSMUSP00000051222	ENSMUSP00000079944	ENSMUSP00000101006	ENSMUSP00000104906	ENSMUSP00000113022	ENSMUSP00000115419	Atp5d	Atp5e	Atp5f1	Atp5j	Atp5k	Atp5o	Cox5a	Cox5b	Cox6c	Cox7c	Cyc1	Ndufa4	Slc2a13	Snap25
GO:0046496	nicotinamide nucleotide metabolic process	8	101	2.5e-05	ENSMUSP00000011058	ENSMUSP00000019323	ENSMUSP00000022268	ENSMUSP00000034567	ENSMUSP00000034856	ENSMUSP00000060346	ENSMUSP00000084846	ENSMUSP00000106481	Aldoa	Dlat	Dld	Dlst	Mdh2	Mpi	Pdhb	Pdhx
GO:0061732	mitochondrial acetyl-CoA biosynthetic process from pyruvate	4	8	2.52e-05	ENSMUSP00000011058	ENSMUSP00000022268	ENSMUSP00000034567	ENSMUSP00000106481	Dlat	Dld	Pdhb	Pdhx
GO:0006417	regulation of translation	12	307	6.64e-05	ENSMUSP00000006496	ENSMUSP00000007814	ENSMUSP00000025511	ENSMUSP00000029722	ENSMUSP00000032998	ENSMUSP00000038135	ENSMUSP00000047008	ENSMUSP00000047678	ENSMUSP00000073175	ENSMUSP00000077612	ENSMUSP00000080854	ENSMUSP00000102213	C1qbp	Dhx9	Eif4g1	Eif5a	Khsrp	Rpl26	Rpl38	Rpl5	Rps14	Rps3	Rps3a1	Rps9
GO:0006084	acetyl-CoA metabolic process	5	29	8.33e-05	ENSMUSP00000011058	ENSMUSP00000022268	ENSMUSP00000034567	ENSMUSP00000060346	ENSMUSP00000106481	Dlat	Dld	Dlst	Pdhb	Pdhx
GO:0006122	mitochondrial electron transport	ubiquinol to cytochrome c	4	12	8.53e-05	ENSMUSP00000023210	ENSMUSP00000053145	ENSMUSP00000054856	ENSMUSP00000077744	Cyc1	Uqcr10	Uqcrh	Uqcrq
GO:0070925	organelle assembly	16	576	0.00011	ENSMUSP00000004554	ENSMUSP00000025511	ENSMUSP00000031617	ENSMUSP00000032998	ENSMUSP00000035105	ENSMUSP00000054490	ENSMUSP00000069004	ENSMUSP00000077612	ENSMUSP00000079180	ENSMUSP00000079628	ENSMUSP00000080354	ENSMUSP00000080854	ENSMUSP00000102213	ENSMUSP00000104067	ENSMUSP00000110013	ENSMUSP00000110532	C1qbp	Rpl3	Rpl38	Rpl5	Rpl6	Rps10	Rps14	Rps15	Rps17	Rps19	Rps23	Rps25	Rps28	Rps3	Rps5	Rpsa
GO:0022607	cellular component assembly	33	2015	0.00013	ENSMUSP00000004554	ENSMUSP00000005509	ENSMUSP00000021273	ENSMUSP00000025511	ENSMUSP00000028727	ENSMUSP00000030212	ENSMUSP00000031617	ENSMUSP00000032998	ENSMUSP00000035105	ENSMUSP00000038135	ENSMUSP00000038781	ENSMUSP00000051657	ENSMUSP00000054490	ENSMUSP00000054856	ENSMUSP00000069004	ENSMUSP00000077612	ENSMUSP00000077733	ENSMUSP00000077744	ENSMUSP00000079180	ENSMUSP00000079628	ENSMUSP00000080354	ENSMUSP00000080854	ENSMUSP00000084846	ENSMUSP00000099902	ENSMUSP00000100912	ENSMUSP00000102213	ENSMUSP00000104067	ENSMUSP00000110013	ENSMUSP00000110374	ENSMUSP00000110532	ENSMUSP00000121358	ENSMUSP00000124509	ENSMUSP00000127774	Aldoa	C1qbp	Dhps	Dhx9	Eif4b	H3f3a	Ide	Psmd8	Rbmx	Rpl3	Rpl38	Rpl5
GO:0006090	pyruvate metabolic process	6	62	0.00018	ENSMUSP00000011058	ENSMUSP00000022268	ENSMUSP00000034567	ENSMUSP00000034856	ENSMUSP00000084846	ENSMUSP00000106481	Aldoa	Dlat	Dld	Mpi	Pdhb	Pdhx
GO:0098876	vesicle-mediated transport to the plasma membrane	6	64	0.00021	ENSMUSP00000021273	ENSMUSP00000028727	ENSMUSP00000034131	ENSMUSP00000090130	ENSMUSP00000099902	ENSMUSP00000121020	Snap25	Sptbn1	Vamp2	Vps26a	Vps29	Vps35
GO:0042776	mitochondrial ATP synthesis coupled proton transport	3	4	0.00023	ENSMUSP00000023210	ENSMUSP00000023677	ENSMUSP00000079944	Atp5o	Cox5b	Cyc1
GO:0045727	positive regulation of translation	7	108	0.00035	ENSMUSP00000006496	ENSMUSP00000029722	ENSMUSP00000038135	ENSMUSP00000047008	ENSMUSP00000073175	ENSMUSP00000077612	ENSMUSP00000080854	C1qbp	Dhx9	Eif5a	Rpl26	Rpl5	Rps3a1	Rps9
GO:0099003	vesicle-mediated transport in synapse	7	109	0.00037	ENSMUSP00000005509	ENSMUSP00000021273	ENSMUSP00000022629	ENSMUSP00000028727	ENSMUSP00000030212	ENSMUSP00000089051	ENSMUSP00000100912	Dpysl2	Sh3gl2	Snap25	Stx1a	Stxbp1	Syt1	Vamp2
GO:0006996	organelle organization	39	2805	0.00062	ENSMUSP00000004554	ENSMUSP00000005509	ENSMUSP00000021273	ENSMUSP00000022629	ENSMUSP00000023062	ENSMUSP00000023712	ENSMUSP00000025511	ENSMUSP00000028727	ENSMUSP00000029699	ENSMUSP00000030636	ENSMUSP00000031617	ENSMUSP00000031862	ENSMUSP00000032998	ENSMUSP00000033176	ENSMUSP00000034131	ENSMUSP00000034211	ENSMUSP00000035105	ENSMUSP00000036907	ENSMUSP00000038135	ENSMUSP00000039633	ENSMUSP00000047678	ENSMUSP00000051033	ENSMUSP00000054490	ENSMUSP00000054856	ENSMUSP00000069004	ENSMUSP00000077612	ENSMUSP00000079180	ENSMUSP00000079628	ENSMUSP00000080354	ENSMUSP00000080854	ENSMUSP00000089051	ENSMUSP00000099902	ENSMUSP00000100912	ENSMUSP00000102213	ENSMUSP00000104067	ENSMUSP00000107795	ENSMUSP00000110013	ENSMUSP00000110532	ENSMUSP00000124509	C1qbp	Cbx3	Dhx9	Dpysl2	Eif4g1	H2afz
GO:0006511	ubiquitin-dependent protein catabolic process	12	397	0.00069	ENSMUSP00000021412	ENSMUSP00000022803	ENSMUSP00000029082	ENSMUSP00000030769	ENSMUSP00000033008	ENSMUSP00000034848	ENSMUSP00000051657	ENSMUSP00000071054	ENSMUSP00000088057	ENSMUSP00000099436	ENSMUSP00000125548	ENSMUSP00000129767	Psma1	Psma2	Psma3	Psma4	Psma5	Psma6	Psma7	Psmb3	Psmb5	Psmc2	Psmc3	Psmd8
GO:0007269	neurotransmitter secretion	6	82	0.00071	ENSMUSP00000005509	ENSMUSP00000009538	ENSMUSP00000021273	ENSMUSP00000028727	ENSMUSP00000089051	ENSMUSP00000100912	Snap25	Stx1a	Stxbp1	Syn2	Syt1	Vamp2
GO:0006139	nucleobase-containing compound metabolic process	47	3702	0.00074	ENSMUSP00000000090	ENSMUSP00000007814	ENSMUSP00000011058	ENSMUSP00000016396	ENSMUSP00000019323	ENSMUSP00000022268	ENSMUSP00000023210	ENSMUSP00000023608	ENSMUSP00000023677	ENSMUSP00000025511	ENSMUSP00000031862	ENSMUSP00000032998	ENSMUSP00000034567	ENSMUSP00000034856	ENSMUSP00000035105	ENSMUSP00000038135	ENSMUSP00000048469	ENSMUSP00000051222	ENSMUSP00000053145	ENSMUSP00000054856	ENSMUSP00000058432	ENSMUSP00000060346	ENSMUSP00000069004	ENSMUSP00000071616	ENSMUSP00000073175	ENSMUSP00000077612	ENSMUSP00000077744	ENSMUSP00000079628	ENSMUSP00000079944	ENSMUSP00000080427	ENSMUSP00000080854	ENSMUSP00000084846	ENSMUSP00000099757	ENSMUSP00000099878	ENSMUSP00000101006	ENSMUSP00000103940	ENSMUSP00000104067	ENSMUSP00000106481	ENSMUSP00000110013	ENSMUSP00000110374	ENSMUSP00000110731	ENSMUSP00000113022	ENSMUSP00000115419	ENSMUSP00000125504	ENSMUSP00000125977
GO:0043254	regulation of protein complex assembly	12	409	0.00087	ENSMUSP00000005509	ENSMUSP00000030636	ENSMUSP00000030769	ENSMUSP00000032998	ENSMUSP00000034131	ENSMUSP00000047678	ENSMUSP00000071054	ENSMUSP00000089051	ENSMUSP00000099902	ENSMUSP00000121358	ENSMUSP00000124509	ENSMUSP00000130668	Eif4g1	H3f3a	Ide	Ncam1	Psmc2	Psmc3	Rps3	Sptbn1	Stmn1	Stx1a	Stxbp1	Vps35
GO:0098662	inorganic cation transmembrane transport	14	547	0.00087	ENSMUSP00000000090	ENSMUSP00000014457	ENSMUSP00000016396	ENSMUSP00000023210	ENSMUSP00000023608	ENSMUSP00000023677	ENSMUSP00000028727	ENSMUSP00000031637	ENSMUSP00000051222	ENSMUSP00000079944	ENSMUSP00000101006	ENSMUSP00000104906	ENSMUSP00000113022	ENSMUSP00000115419	Atp5d	Atp5e	Atp5f1	Atp5j	Atp5k	Atp5o	Cox5a	Cox5b	Cox6c	Cox7c	Cyc1	Ndufa4	Slc2a13	Snap25
GO:0006796	phosphate-containing compound metabolic process	28	1758	0.001	ENSMUSP00000000090	ENSMUSP00000001304	ENSMUSP00000011058	ENSMUSP00000016396	ENSMUSP00000019323	ENSMUSP00000022268	ENSMUSP00000023210	ENSMUSP00000023608	ENSMUSP00000023677	ENSMUSP00000034211	ENSMUSP00000034567	ENSMUSP00000034856	ENSMUSP00000051222	ENSMUSP00000053145	ENSMUSP00000054856	ENSMUSP00000060346	ENSMUSP00000077744	ENSMUSP00000079944	ENSMUSP00000084846	ENSMUSP00000099902	ENSMUSP00000101006	ENSMUSP00000106481	ENSMUSP00000113022	ENSMUSP00000114705	ENSMUSP00000115419	ENSMUSP00000125504	ENSMUSP00000129704	ENSMUSP00000130898	Aldoa	Atp5d	Atp5e	Atp5f1	Atp5j	Atp5j2	Atp5k	Atp5o	Ckb	Cox5a	Cox5b	Cox7c	Cyc1	Dbi	Dlat	Dld	Dlst
GO:0016043	cellular component organization	54	4560	0.001	ENSMUSP00000004554	ENSMUSP00000005509	ENSMUSP00000021273	ENSMUSP00000022629	ENSMUSP00000023062	ENSMUSP00000023712	ENSMUSP00000025511	ENSMUSP00000028727	ENSMUSP00000029699	ENSMUSP00000030212	ENSMUSP00000030636	ENSMUSP00000031617	ENSMUSP00000031862	ENSMUSP00000032998	ENSMUSP00000033176	ENSMUSP00000034131	ENSMUSP00000034211	ENSMUSP00000034369	ENSMUSP00000034966	ENSMUSP00000035105	ENSMUSP00000036907	ENSMUSP00000038135	ENSMUSP00000038781	ENSMUSP00000039633	ENSMUSP00000047678	ENSMUSP00000051033	ENSMUSP00000051657	ENSMUSP00000054490	ENSMUSP00000054856	ENSMUSP00000069004	ENSMUSP00000077612	ENSMUSP00000077733	ENSMUSP00000077744	ENSMUSP00000079180	ENSMUSP00000079628	ENSMUSP00000080354	ENSMUSP00000080427	ENSMUSP00000080854	ENSMUSP00000084846	ENSMUSP00000089051	ENSMUSP00000099435	ENSMUSP00000099902	ENSMUSP00000100912	ENSMUSP00000102213	ENSMUSP00000104067
GO:0046907	intracellular transport	20	1032	0.001	ENSMUSP00000005509	ENSMUSP00000021273	ENSMUSP00000022629	ENSMUSP00000023062	ENSMUSP00000023210	ENSMUSP00000023677	ENSMUSP00000028727	ENSMUSP00000029699	ENSMUSP00000033176	ENSMUSP00000034131	ENSMUSP00000034211	ENSMUSP00000034470	ENSMUSP00000035105	ENSMUSP00000047008	ENSMUSP00000069004	ENSMUSP00000079944	ENSMUSP00000089051	ENSMUSP00000090130	ENSMUSP00000100912	ENSMUSP00000121020	Atp5o	Cox5b	Cyc1	Dpysl2	Eif5a	Lmna	Mt3	Rps15	Rpsa	Snap25	Stx1a	Stxbp1	Syt1	Tomm22	Uqcrc2	Vamp2	Vps26a	Vps26b	Vps29	Vps35
GO:0006099	tricarboxylic acid cycle	4	27	0.0011	ENSMUSP00000019323	ENSMUSP00000022268	ENSMUSP00000034567	ENSMUSP00000060346	Dlat	Dlst	Mdh2	Pdhb
GO:0006725	cellular aromatic compound metabolic process	48	3879	0.0011	ENSMUSP00000000090	ENSMUSP00000007814	ENSMUSP00000011058	ENSMUSP00000016396	ENSMUSP00000019323	ENSMUSP00000022268	ENSMUSP00000023210	ENSMUSP00000023608	ENSMUSP00000023677	ENSMUSP00000025511	ENSMUSP00000031862	ENSMUSP00000032998	ENSMUSP00000034567	ENSMUSP00000034856	ENSMUSP00000035105	ENSMUSP00000038135	ENSMUSP00000048469	ENSMUSP00000051222	ENSMUSP00000053145	ENSMUSP00000054856	ENSMUSP00000058432	ENSMUSP00000060346	ENSMUSP00000069004	ENSMUSP00000071616	ENSMUSP00000073175	ENSMUSP00000077612	ENSMUSP00000077744	ENSMUSP00000079628	ENSMUSP00000079944	ENSMUSP00000080427	ENSMUSP00000080854	ENSMUSP00000084846	ENSMUSP00000099757	ENSMUSP00000099878	ENSMUSP00000100045	ENSMUSP00000101006	ENSMUSP00000103940	ENSMUSP00000104067	ENSMUSP00000106481	ENSMUSP00000110013	ENSMUSP00000110374	ENSMUSP00000110731	ENSMUSP00000113022	ENSMUSP00000115419	ENSMUSP00000125504
GO:0048489	synaptic vesicle transport	6	91	0.0011	ENSMUSP00000005509	ENSMUSP00000021273	ENSMUSP00000022629	ENSMUSP00000028727	ENSMUSP00000089051	ENSMUSP00000100912	Dpysl2	Snap25	Stx1a	Stxbp1	Syt1	Vamp2
GO:0000027	ribosomal large subunit assembly	4	29	0.0014	ENSMUSP00000031617	ENSMUSP00000080354	ENSMUSP00000080854	ENSMUSP00000102213	Rpl3	Rpl38	Rpl5	Rpl6
GO:0016079	synaptic vesicle exocytosis	5	60	0.0015	ENSMUSP00000005509	ENSMUSP00000021273	ENSMUSP00000028727	ENSMUSP00000089051	ENSMUSP00000100912	Snap25	Stx1a	Stxbp1	Syt1	Vamp2
GO:0035493	SNARE complex assembly	3	10	0.0015	ENSMUSP00000005509	ENSMUSP00000021273	ENSMUSP00000028727	Snap25	Stx1a	Vamp2
GO:1901360	organic cyclic compound metabolic process	49	4057	0.0015	ENSMUSP00000000090	ENSMUSP00000007814	ENSMUSP00000011058	ENSMUSP00000016396	ENSMUSP00000019323	ENSMUSP00000022268	ENSMUSP00000023210	ENSMUSP00000023608	ENSMUSP00000023677	ENSMUSP00000025511	ENSMUSP00000031862	ENSMUSP00000032998	ENSMUSP00000034211	ENSMUSP00000034567	ENSMUSP00000034856	ENSMUSP00000035105	ENSMUSP00000038135	ENSMUSP00000048469	ENSMUSP00000051222	ENSMUSP00000053145	ENSMUSP00000054856	ENSMUSP00000058432	ENSMUSP00000060346	ENSMUSP00000069004	ENSMUSP00000071616	ENSMUSP00000073175	ENSMUSP00000077612	ENSMUSP00000077744	ENSMUSP00000079628	ENSMUSP00000079944	ENSMUSP00000080427	ENSMUSP00000080854	ENSMUSP00000084846	ENSMUSP00000099757	ENSMUSP00000099878	ENSMUSP00000100045	ENSMUSP00000101006	ENSMUSP00000103940	ENSMUSP00000104067	ENSMUSP00000106481	ENSMUSP00000110013	ENSMUSP00000110374	ENSMUSP00000110731	ENSMUSP00000113022	ENSMUSP00000115419
GO:0006101	citrate metabolic process	4	31	0.0016	ENSMUSP00000019323	ENSMUSP00000022268	ENSMUSP00000034567	ENSMUSP00000060346	Dlat	Dlst	Mdh2	Pdhb
GO:0033119	negative regulation of RNA splicing	4	31	0.0016	ENSMUSP00000026420	ENSMUSP00000076447	ENSMUSP00000077612	ENSMUSP00000126294	C1qbp	Rps13	Rps26	Rps26-ps1
GO:0051649	establishment of localization in cell	22	1260	0.0017	ENSMUSP00000005509	ENSMUSP00000009538	ENSMUSP00000021273	ENSMUSP00000022629	ENSMUSP00000023062	ENSMUSP00000023210	ENSMUSP00000023677	ENSMUSP00000028727	ENSMUSP00000029699	ENSMUSP00000030212	ENSMUSP00000033176	ENSMUSP00000034131	ENSMUSP00000034211	ENSMUSP00000034470	ENSMUSP00000035105	ENSMUSP00000047008	ENSMUSP00000069004	ENSMUSP00000079944	ENSMUSP00000089051	ENSMUSP00000090130	ENSMUSP00000100912	ENSMUSP00000121020	Atp5o	Cox5b	Cyc1	Dpysl2	Eif5a	Lmna	Mt3	Rps15	Rpsa	Sh3gl2	Snap25	Stx1a	Stxbp1	Syn2	Syt1	Tomm22	Uqcrc2	Vamp2	Vps26a	Vps26b	Vps29	Vps35
GO:0099504	synaptic vesicle cycle	6	103	0.0019	ENSMUSP00000005509	ENSMUSP00000021273	ENSMUSP00000028727	ENSMUSP00000030212	ENSMUSP00000089051	ENSMUSP00000100912	Sh3gl2	Snap25	Stx1a	Stxbp1	Syt1	Vamp2
GO:0016999	antibiotic metabolic process	6	107	0.0024	ENSMUSP00000019323	ENSMUSP00000022268	ENSMUSP00000022573	ENSMUSP00000034567	ENSMUSP00000060346	ENSMUSP00000100045	Akr1b3	Dlat	Dlst	Esd	Mdh2	Pdhb
GO:0006886	intracellular protein transport	14	616	0.0025	ENSMUSP00000005509	ENSMUSP00000021273	ENSMUSP00000023062	ENSMUSP00000028727	ENSMUSP00000029699	ENSMUSP00000033176	ENSMUSP00000034131	ENSMUSP00000034211	ENSMUSP00000034470	ENSMUSP00000035105	ENSMUSP00000047008	ENSMUSP00000069004	ENSMUSP00000090130	ENSMUSP00000121020	Eif5a	Lmna	Mt3	Rps15	Rpsa	Snap25	Stx1a	Tomm22	Uqcrc2	Vamp2	Vps26a	Vps26b	Vps29	Vps35
GO:0098877	neurotransmitter receptor transport to plasma membrane	3	13	0.0027	ENSMUSP00000021273	ENSMUSP00000028727	ENSMUSP00000034131	Snap25	Vamp2	Vps35
GO:0050806	positive regulation of synaptic transmission	7	163	0.0031	ENSMUSP00000005509	ENSMUSP00000021273	ENSMUSP00000028727	ENSMUSP00000047968	ENSMUSP00000089051	ENSMUSP00000100912	ENSMUSP00000114705	Dbi	S100b	Snap25	Stx1a	Stxbp1	Syt1	Vamp2
GO:0031629	synaptic vesicle fusion to presynaptic active zone membrane	3	14	0.0032	ENSMUSP00000005509	ENSMUSP00000028727	ENSMUSP00000089051	Snap25	Stx1a	Stxbp1
GO:0006123	mitochondrial electron transport	cytochrome c to oxygen	3	15	0.0037	ENSMUSP00000000090	ENSMUSP00000079944	ENSMUSP00000115419	Cox5a	Cox5b	Cox7c
GO:0000461	endonucleolytic cleavage to generate mature 3'-end of SSU-rRNA from (SSU-rRNA	5.8S rRNA	LSU-rRNA)	2	2	0.0041	ENSMUSP00000035105	ENSMUSP00000058432	Rps21	Rpsa
GO:1905696	regulation of polysome binding	2	2	0.0041	ENSMUSP00000038135	ENSMUSP00000047678	Dhx9	Eif4g1
GO:0044272	sulfur compound biosynthetic process	5	78	0.0043	ENSMUSP00000011058	ENSMUSP00000022268	ENSMUSP00000034567	ENSMUSP00000106481	ENSMUSP00000129704	Dlat	Dld	Enoph1	Pdhb	Pdhx
GO:1990126	retrograde transport	endosome to plasma membrane	3	18	0.0057	ENSMUSP00000034131	ENSMUSP00000090130	ENSMUSP00000121020	Vps26a	Vps29	Vps35
GO:0009108	coenzyme biosynthetic process	6	130	0.0058	ENSMUSP00000011058	ENSMUSP00000022268	ENSMUSP00000034567	ENSMUSP00000034856	ENSMUSP00000084846	ENSMUSP00000106481	Aldoa	Dlat	Dld	Mpi	Pdhb	Pdhx
GO:0051641	cellular localization	26	1792	0.0063	ENSMUSP00000005509	ENSMUSP00000009538	ENSMUSP00000021273	ENSMUSP00000022629	ENSMUSP00000023062	ENSMUSP00000023210	ENSMUSP00000023677	ENSMUSP00000028727	ENSMUSP00000029699	ENSMUSP00000030212	ENSMUSP00000031314	ENSMUSP00000033176	ENSMUSP00000034131	ENSMUSP00000034211	ENSMUSP00000034470	ENSMUSP00000035105	ENSMUSP00000038135	ENSMUSP00000039633	ENSMUSP00000047008	ENSMUSP00000069004	ENSMUSP00000079944	ENSMUSP00000089051	ENSMUSP00000090130	ENSMUSP00000099902	ENSMUSP00000100912	ENSMUSP00000121020	Alb	Atp5o	Cox5b	Cyc1	Dhx9	Dpysl2	Eif5a	Lmna	Mt3	Rps15	Rpsa	Sh3gl2	Snap25	Sptbn1	Stx1a	Stxbp1	Syn2	Syt1	Tln2
GO:0106020	regulation of vesicle docking	2	3	0.0065	ENSMUSP00000089051	ENSMUSP00000130668	Ncam1	Stxbp1
GO:0006906	vesicle fusion	5	90	0.0077	ENSMUSP00000005509	ENSMUSP00000021273	ENSMUSP00000028727	ENSMUSP00000089051	ENSMUSP00000100912	Snap25	Stx1a	Stxbp1	Syt1	Vamp2
GO:0060291	long-term synaptic potentiation	4	52	0.0086	ENSMUSP00000021273	ENSMUSP00000028727	ENSMUSP00000047968	ENSMUSP00000114705	Dbi	S100b	Snap25	Vamp2
GO:0006812	cation transport	15	795	0.0087	ENSMUSP00000000090	ENSMUSP00000014457	ENSMUSP00000016396	ENSMUSP00000023210	ENSMUSP00000023608	ENSMUSP00000023677	ENSMUSP00000028727	ENSMUSP00000031637	ENSMUSP00000034211	ENSMUSP00000051222	ENSMUSP00000079944	ENSMUSP00000101006	ENSMUSP00000104906	ENSMUSP00000113022	ENSMUSP00000115419	Atp5d	Atp5e	Atp5f1	Atp5j	Atp5k	Atp5o	Cox5a	Cox5b	Cox6c	Cox7c	Cyc1	Mt3	Ndufa4	Slc2a13	Snap25
GO:0106077	histone succinylation	2	4	0.0092	ENSMUSP00000060346	ENSMUSP00000106481	Dld	Dlst
GO:0034101	erythrocyte homeostasis	5	96	0.0097	ENSMUSP00000025511	ENSMUSP00000079628	ENSMUSP00000099878	ENSMUSP00000104067	ENSMUSP00000125977	Rps14	Rps17	Rps19	Rps24	Rps6
GO:0045956	positive regulation of calcium ion-dependent exocytosis	3	23	0.01	ENSMUSP00000005509	ENSMUSP00000089051	ENSMUSP00000100912	Stx1a	Stxbp1	Syt1
GO:0065008	regulation of biological quality	40	3420	0.0123	ENSMUSP00000001304	ENSMUSP00000004554	ENSMUSP00000005509	ENSMUSP00000006496	ENSMUSP00000007814	ENSMUSP00000009538	ENSMUSP00000021273	ENSMUSP00000022629	ENSMUSP00000025511	ENSMUSP00000028727	ENSMUSP00000029699	ENSMUSP00000030636	ENSMUSP00000031314	ENSMUSP00000034131	ENSMUSP00000034211	ENSMUSP00000034966	ENSMUSP00000038135	ENSMUSP00000039633	ENSMUSP00000047008	ENSMUSP00000047678	ENSMUSP00000047968	ENSMUSP00000052912	ENSMUSP00000076564	ENSMUSP00000077733	ENSMUSP00000079628	ENSMUSP00000080427	ENSMUSP00000080854	ENSMUSP00000084846	ENSMUSP00000089051	ENSMUSP00000099435	ENSMUSP00000099878	ENSMUSP00000099902	ENSMUSP00000100045	ENSMUSP00000100912	ENSMUSP00000104067	ENSMUSP00000105709	ENSMUSP00000106481	ENSMUSP00000114705	ENSMUSP00000121358	ENSMUSP00000125977	Akr1b3	Alb	Aldoa	Calm1	Ckb
GO:0110096	cellular response to aldehyde	2	5	0.0124	ENSMUSP00000022573	ENSMUSP00000100045	Akr1b3	Esd
GO:0099132	ATP hydrolysis coupled cation transmembrane transport	4	62	0.0151	ENSMUSP00000016396	ENSMUSP00000023677	ENSMUSP00000101006	ENSMUSP00000113022	Atp5d	Atp5e	Atp5f1	Atp5o
GO:1990542	mitochondrial transmembrane transport	4	62	0.0151	ENSMUSP00000023062	ENSMUSP00000023210	ENSMUSP00000023677	ENSMUSP00000079944	Atp5o	Cox5b	Cyc1	Tomm22
GO:0031503	protein-containing complex localization	6	162	0.0154	ENSMUSP00000021273	ENSMUSP00000028727	ENSMUSP00000034131	ENSMUSP00000035105	ENSMUSP00000047008	ENSMUSP00000069004	Eif5a	Rps15	Rpsa	Snap25	Vamp2	Vps35
GO:0098967	exocytic insertion of neurotransmitter receptor to postsynaptic membrane	2	6	0.016	ENSMUSP00000021273	ENSMUSP00000028727	Snap25	Vamp2
GO:0031330	negative regulation of cellular catabolic process	7	226	0.0165	ENSMUSP00000034131	ENSMUSP00000034211	ENSMUSP00000038135	ENSMUSP00000047678	ENSMUSP00000080854	ENSMUSP00000099435	ENSMUSP00000114705	Dbi	Dhx9	Eif4g1	Mt3	Rpl23	Rpl5	Vps35
GO:0031640	killing of cells of other organism	3	30	0.0188	ENSMUSP00000031314	ENSMUSP00000104067	ENSMUSP00000106014	Alb	Rpl30	Rps19
GO:0000447	endonucleolytic cleavage in ITS1 to separate SSU-rRNA from 5.8S rRNA and LSU-rRNA from tricistronic rRNA transcript (SSU-rRNA	5.8S rRNA	LSU-rRNA)	2	7	0.0196	ENSMUSP00000035105	ENSMUSP00000058432	Rps21	Rpsa
GO:0099174	regulation of presynapse organization	2	7	0.0196	ENSMUSP00000034131	ENSMUSP00000047678	Eif4g1	Vps35
GO:0006810	transport	37	3187	0.0208	ENSMUSP00000000090	ENSMUSP00000005509	ENSMUSP00000007814	ENSMUSP00000009538	ENSMUSP00000014457	ENSMUSP00000016396	ENSMUSP00000021273	ENSMUSP00000022629	ENSMUSP00000023062	ENSMUSP00000023210	ENSMUSP00000023608	ENSMUSP00000023677	ENSMUSP00000028727	ENSMUSP00000029699	ENSMUSP00000030212	ENSMUSP00000031637	ENSMUSP00000033176	ENSMUSP00000034131	ENSMUSP00000034211	ENSMUSP00000034470	ENSMUSP00000035105	ENSMUSP00000038135	ENSMUSP00000047008	ENSMUSP00000051222	ENSMUSP00000052912	ENSMUSP00000069004	ENSMUSP00000079944	ENSMUSP00000089051	ENSMUSP00000090130	ENSMUSP00000099902	ENSMUSP00000100912	ENSMUSP00000101006	ENSMUSP00000104906	ENSMUSP00000113022	ENSMUSP00000115419	ENSMUSP00000121020	ENSMUSP00000125504	Atp5d	Atp5e	Atp5f1	Atp5j	Atp5j2	Atp5k	Atp5o	Cox5a
GO:0034613	cellular protein localization	18	1162	0.0208	ENSMUSP00000005509	ENSMUSP00000021273	ENSMUSP00000023062	ENSMUSP00000028727	ENSMUSP00000029699	ENSMUSP00000033176	ENSMUSP00000034131	ENSMUSP00000034211	ENSMUSP00000034470	ENSMUSP00000035105	ENSMUSP00000038135	ENSMUSP00000039633	ENSMUSP00000047008	ENSMUSP00000069004	ENSMUSP00000089051	ENSMUSP00000090130	ENSMUSP00000099902	ENSMUSP00000121020	Dhx9	Eif5a	Lmna	Mt3	Rps15	Rpsa	Snap25	Sptbn1	Stx1a	Stxbp1	Tln2	Tomm22	Uqcrc2	Vamp2	Vps26a	Vps26b	Vps29	Vps35
GO:0017158	regulation of calcium ion-dependent exocytosis	4	70	0.021	ENSMUSP00000005509	ENSMUSP00000021273	ENSMUSP00000089051	ENSMUSP00000100912	Stx1a	Stxbp1	Syt1	Vamp2
GO:0042147	retrograde transport	endosome to Golgi	4	70	0.021	ENSMUSP00000034131	ENSMUSP00000034470	ENSMUSP00000090130	ENSMUSP00000121020	Vps26a	Vps26b	Vps29	Vps35
GO:0043484	regulation of RNA splicing	5	120	0.0218	ENSMUSP00000026420	ENSMUSP00000076447	ENSMUSP00000077612	ENSMUSP00000110374	ENSMUSP00000126294	C1qbp	Rbmx	Rps13	Rps26	Rps26-ps1
GO:0006839	mitochondrial transport	6	181	0.024	ENSMUSP00000023062	ENSMUSP00000023210	ENSMUSP00000023677	ENSMUSP00000033176	ENSMUSP00000034131	ENSMUSP00000079944	Atp5o	Cox5b	Cyc1	Tomm22	Uqcrc2	Vps35
GO:0061024	membrane organization	11	548	0.024	ENSMUSP00000005509	ENSMUSP00000021273	ENSMUSP00000023062	ENSMUSP00000028727	ENSMUSP00000029699	ENSMUSP00000030212	ENSMUSP00000034131	ENSMUSP00000034211	ENSMUSP00000089051	ENSMUSP00000099902	ENSMUSP00000100912	Lmna	Mt3	Sh3gl2	Snap25	Sptbn1	Stx1a	Stxbp1	Syt1	Tomm22	Vamp2	Vps35
GO:0045026	plasma membrane fusion	3	34	0.0244	ENSMUSP00000005509	ENSMUSP00000028727	ENSMUSP00000089051	Snap25	Stx1a	Stxbp1
GO:0010807	regulation of synaptic vesicle priming	2	9	0.028	ENSMUSP00000005509	ENSMUSP00000089051	Stx1a	Stxbp1
GO:0061844	antimicrobial humoral immune response mediated by antimicrobial peptide	3	36	0.0281	ENSMUSP00000104067	ENSMUSP00000106014	ENSMUSP00000110886	Rpl30	Rpl39	Rps19
GO:0051186	cofactor metabolic process	9	403	0.0296	ENSMUSP00000011058	ENSMUSP00000019323	ENSMUSP00000022268	ENSMUSP00000034567	ENSMUSP00000034856	ENSMUSP00000060346	ENSMUSP00000084846	ENSMUSP00000100045	ENSMUSP00000106481	Akr1b3	Aldoa	Dlat	Dld	Dlst	Mdh2	Mpi	Pdhb	Pdhx
GO:0048167	regulation of synaptic plasticity	6	193	0.0319	ENSMUSP00000021273	ENSMUSP00000028727	ENSMUSP00000047968	ENSMUSP00000080427	ENSMUSP00000089051	ENSMUSP00000114705	Ctnnd2	Dbi	S100b	Snap25	Stxbp1	Vamp2
GO:0061951	establishment of protein localization to plasma membrane	3	38	0.0321	ENSMUSP00000021273	ENSMUSP00000034131	ENSMUSP00000099902	Sptbn1	Vamp2	Vps35
GO:1904667	negative regulation of ubiquitin protein ligase activity	2	10	0.0327	ENSMUSP00000080854	ENSMUSP00000099435	Rpl23	Rpl5
GO:0006790	sulfur compound metabolic process	7	262	0.0328	ENSMUSP00000011058	ENSMUSP00000022268	ENSMUSP00000034567	ENSMUSP00000060346	ENSMUSP00000106481	ENSMUSP00000113115	ENSMUSP00000129704	Dlat	Dld	Dlst	Enoph1	Pdhb	Pdhx	Spock2
GO:0090150	establishment of protein localization to membrane	5	137	0.0358	ENSMUSP00000021273	ENSMUSP00000023062	ENSMUSP00000028727	ENSMUSP00000034131	ENSMUSP00000099902	Snap25	Sptbn1	Tomm22	Vamp2	Vps35
GO:0034109	homotypic cell-cell adhesion	3	41	0.0377	ENSMUSP00000052912	ENSMUSP00000089051	ENSMUSP00000130668	Ncam1	Pdia6	Stxbp1
GO:0061615	glycolytic process through fructose-6-phosphate	2	11	0.0377	ENSMUSP00000034856	ENSMUSP00000084846	Aldoa	Mpi
GO:1902231	positive regulation of intrinsic apoptotic signaling pathway in response to DNA damage	2	11	0.0377	ENSMUSP00000032998	ENSMUSP00000073175	Rpl26	Rps3
GO:0005996	monosaccharide metabolic process	5	148	0.0473	ENSMUSP00000022268	ENSMUSP00000034567	ENSMUSP00000034856	ENSMUSP00000084846	ENSMUSP00000100045	Akr1b3	Aldoa	Dlat	Mpi	Pdhb
GO:0050658	RNA transport	5	148	0.0473	ENSMUSP00000007814	ENSMUSP00000035105	ENSMUSP00000038135	ENSMUSP00000047008	ENSMUSP00000069004	Dhx9	Eif5a	Khsrp	Rps15	Rpsa
[truncated: 251 more columns]

## Sheet: PPI
#node1	node2	node1_string_internal_id	node2_string_internal_id	node1_external_id	node2_external_id	neighborhood_on_chromosome	gene_fusion	phylogenetic_cooccurrence	homology	coexpression	experimentally_determined_interaction		database_annotated		automated_textmining		combined_score
Rpl30	Rpl10a	5032315	5023403	10090.ENSMUSP00000106014	10090.ENSMUSP00000048469	0	0	0	0	0.909	0.971	1	0.9	1	0.66	1	0.999
Rpl35a	Rps27a	5033146	5031143	10090.ENSMUSP00000110731	10090.ENSMUSP00000099909	0	0	0	0	0.91	0.896	1	0.9	1	0.406	1	0.999
Rpl10a	Rps5	5023403	5015759	10090.ENSMUSP00000048469	10090.ENSMUSP00000004554	0.164	0	0	0	0.986	0.894	1	0.9	1	0.787	1	0.999
Rpl32	Rps11	5028158	5015656	10090.ENSMUSP00000080523	10090.ENSMUSP00000003521	0.172	0	0	0	0.912	0.971	1	0.9	1	0.544	1	0.999
Rpl22	Rpl32	5034020	5028158	10090.ENSMUSP00000118787	10090.ENSMUSP00000080523	0	0	0	0	0.876	0.971	1	0.9	1	0.407	1	0.999
Rps25	Rpl19	5027947	5016512	10090.ENSMUSP00000079180	10090.ENSMUSP00000017548	0	0	0	0	0.954	0.971	1	0.9	1	0.737	1	0.999
Rps13	Rpl30	5034698	5032315	10090.ENSMUSP00000126294	10090.ENSMUSP00000106014	0	0	0.221	0	0.911	0.971	1	0.9	1	0.831	1	0.999
Psma5	Psma6	5028998	5017199	10090.ENSMUSP00000088057	10090.ENSMUSP00000021412	0	0	0.411	0.793	0.82	0.958	1	0.9	1	0.765	1	0.999
Rpl5	Rps14	5028222	5018277	10090.ENSMUSP00000080854	10090.ENSMUSP00000025511	0.172	0	0	0	0.999	0.86	1	0	0	0.909	1	0.999
Rps24	Rps21	5034648	5024953	10090.ENSMUSP00000125977	10090.ENSMUSP00000058432	0	0	0	0	0.922	0.889	1	0.72	1	0.765	1	0.999
Rpl37	Rpl8	5023036	5015714	10090.ENSMUSP00000046506	10090.ENSMUSP00000004072	0	0	0	0	0.824	0.972	1	0.9	1	0.589	1	0.999
Rpl32	Rpl36	5028158	5027972	10090.ENSMUSP00000080523	10090.ENSMUSP00000079340	0	0	0	0	0.896	0.95	1	0.9	1	0.337	1	0.999
Rpl31	Rpl18	5036727	5031793	10090.ENSMUSP00000137631	10090.ENSMUSP00000103365	0	0	0	0	0.911	0.962	1	0.72	1	0.69	1	0.999
Rps15a	Rps19	5034103	5031943	10090.ENSMUSP00000119975	10090.ENSMUSP00000104067	0	0	0	0	0.999	0.896	1	0.9	1	0.586	1	0.999
Rps28	Rps14	5033019	5018277	10090.ENSMUSP00000110013	10090.ENSMUSP00000025511	0	0	0	0	0.866	0.958	1	0.9	1	0.754	1	0.999
Rps8	Rpl37	5031065	5023036	10090.ENSMUSP00000099757	10090.ENSMUSP00000046506	0	0	0	0	0.827	0.97	1	0.9	1	0.414	1	0.999
Rpl4	Rps5	5021039	5015759	10090.ENSMUSP00000034966	10090.ENSMUSP00000004554	0.139	0	0	0	0.902	0.821	1	0.9	1	0.585	1	0.999
Rpl4	Rps3a1	5021039	5019462	10090.ENSMUSP00000034966	10090.ENSMUSP00000029722	0	0	0	0	0.927	0.826	1	0.9	1	0.722	1	0.999
Rps24	Rpl5	5034648	5028222	10090.ENSMUSP00000125977	10090.ENSMUSP00000080854	0	0	0	0	0.999	0.817	1	0	0	0.911	1	0.999
Rpl26	Rps9	5026969	5015940	10090.ENSMUSP00000073175	10090.ENSMUSP00000006496	0.164	0	0	0	0.904	0.971	1	0.9	1	0.725	1	0.999
Rps25	Rps26-ps1	5027947	5027499	10090.ENSMUSP00000079180	10090.ENSMUSP00000076447	0	0	0	0	0.778	0.958	1	0.72	1	0.672	1	0.999
Rps19	Rps21	5031943	5024953	10090.ENSMUSP00000104067	10090.ENSMUSP00000058432	0	0	0	0	0.939	0.896	1	0.9	1	0.556	1	0.999
Rps8	Rps23	5031065	5024346	10090.ENSMUSP00000099757	10090.ENSMUSP00000054490	0	0	0	0	0.94	0.971	1	0.9	1	0.839	1	0.999
Rps23	Rpl8	5024346	5015714	10090.ENSMUSP00000054490	10090.ENSMUSP00000004072	0.164	0	0	0	0.959	0.972	1	0.9	1	0.803	1	0.999
Rps15a	Rps16	5034103	5031918	10090.ENSMUSP00000119975	10090.ENSMUSP00000103940	0.17	0	0	0	0.931	0.971	1	0.72	1	0.686	1	0.999
Rpl35a	Rpl30	5033146	5032315	10090.ENSMUSP00000110731	10090.ENSMUSP00000106014	0	0	0	0	0.999	0.971	1	0.9	1	0.473	1	0.999
Rpl32	Rps18	5028158	5016094	10090.ENSMUSP00000080523	10090.ENSMUSP00000008812	0	0	0	0	0.826	0.95	1	0.9	1	0.5	1	0.999
Rps16	Rps17	5031918	5028013	10090.ENSMUSP00000103940	10090.ENSMUSP00000079628	0	0	0	0	0.908	0.971	1	0.72	1	0.81	1	0.999
Rps8	Rps17	5031065	5028013	10090.ENSMUSP00000099757	10090.ENSMUSP00000079628	0	0	0	0	0.957	0.971	1	0.72	1	0.675	1	0.999
Rps24	Rpl7	5034648	5026693	10090.ENSMUSP00000125977	10090.ENSMUSP00000071616	0	0	0	0	0.999	0.797	1	0	0	0.71	1	0.999
Rps6	Rps11	5031125	5015656	10090.ENSMUSP00000099878	10090.ENSMUSP00000003521	0	0	0	0	0.999	0.971	1	0.9	1	0.634	1	0.999
Psma6	Psmb4	5017199	5015885	10090.ENSMUSP00000021412	10090.ENSMUSP00000005923	0	0	0	0	0.826	0.961	1	0.9	1	0.761	1	0.999
Rpl36	Rps25	5027972	5027947	10090.ENSMUSP00000079340	10090.ENSMUSP00000079180	0	0	0	0	0.879	0.95	1	0.9	1	0.557	1	0.999
Psmb3	Psmb7	5030905	5018980	10090.ENSMUSP00000099436	10090.ENSMUSP00000028083	0	0	0.205	0	0.742	0.944	1	0.9	1	0.7	1	0.999
Psma1	Psmb4	5020413	5015885	10090.ENSMUSP00000033008	10090.ENSMUSP00000005923	0	0	0	0	0.814	0.971	1	0.9	1	0.72	1	0.999
Rpl30	Rpl18	5032315	5031793	10090.ENSMUSP00000106014	10090.ENSMUSP00000103365	0.192	0	0	0	0.91	0.969	1	0.9	1	0.604	1	0.999
Rpl14	Rps19	5035620	5031943	10090.ENSMUSP00000131489	10090.ENSMUSP00000104067	0	0	0	0	0.881	0.855	1	0.9	1	0.733	1	0.999
Rpl14	Rpl4	5035620	5021039	10090.ENSMUSP00000131489	10090.ENSMUSP00000034966	0.088	0	0	0	0.915	0.818	1	0.9	1	0.55	1	0.999
Rps13	Rpl37a	5034698	5025033	10090.ENSMUSP00000126294	10090.ENSMUSP00000058919	0	0	0.285	0	0.872	0.97	1	0.9	1	0.283	1	0.999
Rps15a	Rps3a1	5034103	5019462	10090.ENSMUSP00000119975	10090.ENSMUSP00000029722	0	0	0	0	0.999	0.971	1	0.9	1	0.531	1	0.999
Rpl3	Rps3a1	5028126	5019462	10090.ENSMUSP00000080354	10090.ENSMUSP00000029722	0	0	0	0	0.999	0.86	1	0.9	1	0.508	1	0.999
Rpl26	Rpl7	5026969	5026693	10090.ENSMUSP00000073175	10090.ENSMUSP00000071616	0.119	0	0	0	0.999	0.957	1	0.72	1	0.761	1	0.999
Rpl3	Rpl10a	5028126	5023403	10090.ENSMUSP00000080354	10090.ENSMUSP00000048469	0.139	0	0	0	0.999	0.827	1	0.9	1	0.611	1	0.999
Rpl35a	Rpl38	5033146	5031605	10090.ENSMUSP00000110731	10090.ENSMUSP00000102213	0	0	0	0	0.91	0.889	1	0.9	1	0.748	1	0.999
Rpl26	Rpl4	5026969	5021039	10090.ENSMUSP00000073175	10090.ENSMUSP00000034966	0.139	0	0.255	0	0.927	0.82	1	0.9	1	0.685	1	0.999
Rpl23	Rpl37	5030904	5023036	10090.ENSMUSP00000099435	10090.ENSMUSP00000046506	0	0	0	0	0.851	0.971	1	0.9	1	0.222	1	0.999
Rps25	Rpl10a	5027947	5023403	10090.ENSMUSP00000079180	10090.ENSMUSP00000048469	0	0	0	0	0.999	0.971	1	0.9	1	0.626	1	0.999
Rps13	Rps28	5034698	5033019	10090.ENSMUSP00000126294	10090.ENSMUSP00000110013	0	0	0	0	0.806	0.958	1	0.9	1	0.522	1	0.999
Psma2	Psmb10	5035328	5020832	10090.ENSMUSP00000129767	10090.ENSMUSP00000034369	0	0	0.235	0	0.752	0.944	1	0.9	1	0.572	1	0.999
Rps15a	Rpl5	5034103	5028222	10090.ENSMUSP00000119975	10090.ENSMUSP00000080854	0.193	0	0	0	0.999	0.86	1	0	0	0.572	1	0.999
Rpl32	Rpl10a	5028158	5023403	10090.ENSMUSP00000080523	10090.ENSMUSP00000048469	0	0	0	0	0.917	0.971	1	0.9	1	0.444	1	0.999
Rps20	Rps15a	5034139	5034103	10090.ENSMUSP00000120528	10090.ENSMUSP00000119975	0.172	0	0	0	0.886	0.972	1	0.72	1	0.579	1	0.999
Rps27a	Rpl32	5031143	5028158	10090.ENSMUSP00000099909	10090.ENSMUSP00000080523	0	0	0	0	0.91	0.895	1	0.9	1	0.397	1	0.999
Rpl3	Rps3	5028126	5020408	10090.ENSMUSP00000080354	10090.ENSMUSP00000032998	0.17	0	0.207	0	0.999	0.812	1	0.9	1	0.755	1	0.999
Psmb3	Psma7	5030905	5019262	10090.ENSMUSP00000099436	10090.ENSMUSP00000029082	0	0	0	0	0.855	0.94	1	0.9	1	0.749	1	0.999
Rpl22	Rps23	5034020	5024346	10090.ENSMUSP00000118787	10090.ENSMUSP00000054490	0	0	0	0	0.828	0.971	1	0.9	1	0.661	1	0.999
Rpl30	Rps29	5032315	5021660	10090.ENSMUSP00000106014	10090.ENSMUSP00000038352	0	0	0	0	0.833	0.971	1	0.72	1	0.505	1	0.999
Rpl3	Rps14	5028126	5018277	10090.ENSMUSP00000080354	10090.ENSMUSP00000025511	0.139	0	0	0	0.999	0.851	1	0.9	1	0.522	1	0.999
Rpl4	Rpl19	5021039	5016512	10090.ENSMUSP00000034966	10090.ENSMUSP00000017548	0	0	0	0	0.933	0.824	1	0.9	1	0.712	1	0.999
Rps15a	Rps9	5034103	5015940	10090.ENSMUSP00000119975	10090.ENSMUSP00000006496	0.172	0	0	0	0.881	0.972	1	0.9	1	0.694	1	0.999
Rpl34	Rpl19	5028844	5016512	10090.ENSMUSP00000086614	10090.ENSMUSP00000017548	0.172	0	0	0	0.934	0.801	1	0.9	1	0.359	1	0.999
Rpl26	Rps3	5026969	5020408	10090.ENSMUSP00000073175	10090.ENSMUSP00000032998	0.172	0	0.319	0	0.909	0.971	1	0.9	1	0.821	1	0.999
Rps28	Rpl37a	5033019	5025033	10090.ENSMUSP00000110013	10090.ENSMUSP00000058919	0	0	0.261	0	0.934	0.958	1	0.9	1	0.32	1	0.999
Rps6	Rpl37	5031125	5023036	10090.ENSMUSP00000099878	10090.ENSMUSP00000046506	0	0	0	0	0.826	0.971	1	0.9	1	0.328	1	0.999
Rpl30	Rps8	5032315	5031065	10090.ENSMUSP00000106014	10090.ENSMUSP00000099757	0	0	0	0	0.941	0.971	1	0.9	1	0.447	1	0.999
Rpl10a	Rps11	5023403	5015656	10090.ENSMUSP00000048469	10090.ENSMUSP00000003521	0.172	0	0	0	0.999	0.971	1	0.9	1	0.356	1	0.999
Atp5j2	Atp5f1	5034574	5033489	10090.ENSMUSP00000125504	10090.ENSMUSP00000113022	0	0	0	0	0.885	0.856	1	0.9	1	0.571	1	0.999
Psmc3	Psmb2	5026606	5019726	10090.ENSMUSP00000071054	10090.ENSMUSP00000030642	0.06	0	0	0	0.803	0.82	1	0.9	1	0.789	1	0.999
Rps3	Rps3a1	5020408	5019462	10090.ENSMUSP00000032998	10090.ENSMUSP00000029722	0	0	0.224	0	0.999	0.971	1	0.9	1	0.678	1	0.999
Rps6	Rpl36	5031125	5027972	10090.ENSMUSP00000099878	10090.ENSMUSP00000079340	0	0	0	0	0.769	0.95	1	0.9	1	0.357	1	0.999
Rps15a	Rpl8	5034103	5015714	10090.ENSMUSP00000119975	10090.ENSMUSP00000004072	0.172	0	0.201	0	0.926	0.972	1	0.9	1	0.425	1	0.999
Rpl38	Rpl26	5031605	5026969	10090.ENSMUSP00000102213	10090.ENSMUSP00000073175	0	0	0	0	0.937	0.896	1	0.9	1	0.802	1	0.999
Rps27a	Rpl37a	5031143	5025033	10090.ENSMUSP00000099909	10090.ENSMUSP00000058919	0	0	0	0	0.96	0.889	1	0.9	1	0.103	1	0.999
Rps19	Rps11	5031943	5015656	10090.ENSMUSP00000104067	10090.ENSMUSP00000003521	0	0	0	0	0.999	0.896	1	0.9	1	0.675	1	0.999
Rps8	Rpl4	5031065	5021039	10090.ENSMUSP00000099757	10090.ENSMUSP00000034966	0	0	0	0	0.942	0.82	1	0.9	1	0.335	1	0.999
Rpl23	Rpl8	5030904	5015714	10090.ENSMUSP00000099435	10090.ENSMUSP00000004072	0.172	0	0.317	0	0.999	0.971	1	0.9	1	0.305	1	0.999
Rpl4	Rps9	5021039	5015940	10090.ENSMUSP00000034966	10090.ENSMUSP00000006496	0.139	0	0	0	0.898	0.82	1	0.9	1	0.527	1	0.999
Rpl30	Rpl3	5032315	5028126	10090.ENSMUSP00000106014	10090.ENSMUSP00000080354	0	0	0	0	0.916	0.858	1	0.9	1	0.706	1	0.999
Rps17	Rps26-ps1	5028013	5027499	10090.ENSMUSP00000079628	10090.ENSMUSP00000076447	0	0	0	0	0.774	0.958	1	0.72	1	0.844	1	0.999
Rps3	Rps9	5020408	5015940	10090.ENSMUSP00000032998	10090.ENSMUSP00000006496	0.172	0	0	0	0.991	0.972	1	0.9	1	0.714	1	0.999
Rps29	Rps11	5021660	5015656	10090.ENSMUSP00000038352	10090.ENSMUSP00000003521	0.17	0	0	0	0.914	0.971	1	0.72	1	0.516	1	0.999
Rpl37a	Rps9	5025033	5015940	10090.ENSMUSP00000058919	10090.ENSMUSP00000006496	0	0	0	0	0.901	0.97	1	0.9	1	0.329	1	0.999
Rps16	Rpl19	5031918	5016512	10090.ENSMUSP00000103940	10090.ENSMUSP00000017548	0	0	0	0	0.961	0.971	1	0	0	0.694	1	0.999
Atp5d	Atp5o	5031383	5017883	10090.ENSMUSP00000101006	10090.ENSMUSP00000023677	0.193	0	0	0	0.905	0.806	1	0.9	1	0.852	1	0.999
Rpl37	Rps3	5023036	5020408	10090.ENSMUSP00000046506	10090.ENSMUSP00000032998	0	0	0	0	0.828	0.972	1	0.9	1	0.709	1	0.999
Rps3	Rpl8	5020408	5015714	10090.ENSMUSP00000032998	10090.ENSMUSP00000004072	0.172	0	0	0	0.999	0.972	1	0.9	1	0.74	1	0.999
Rps8	Rpl6	5031065	5020043	10090.ENSMUSP00000099757	10090.ENSMUSP00000031617	0	0	0	0	0.913	0.794	1	0.9	1	0.761	1	0.999
Rpl26	Rpl8	5026969	5015714	10090.ENSMUSP00000073175	10090.ENSMUSP00000004072	0.164	0	0.275	0	0.939	0.971	1	0.9	1	0.626	1	0.999
Rpl6	Rps14	5020043	5018277	10090.ENSMUSP00000031617	10090.ENSMUSP00000025511	0.107	0	0	0	0.862	0.796	1	0.9	1	0.768	1	0.999
Rps17	Rps11	5028013	5015656	10090.ENSMUSP00000079628	10090.ENSMUSP00000003521	0	0	0	0	0.963	0.972	1	0.72	1	0.705	1	0.999
Rps26	Rpl19	5018537	5016512	10090.ENSMUSP00000026420	10090.ENSMUSP00000017548	0	0	0	0	0.93	0.958	1	0.72	1	0.473	1	0.999
Rps20	Rps16	5034139	5031918	10090.ENSMUSP00000120528	10090.ENSMUSP00000103940	0.139	0	0	0	0.929	0.972	1	0.72	1	0.718	1	0.999
Rpl35a	Rps28	5033146	5033019	10090.ENSMUSP00000110731	10090.ENSMUSP00000110013	0	0	0	0	0.861	0.958	1	0.9	1	0.575	1	0.999
Rpl6	Rps5	5020043	5015759	10090.ENSMUSP00000031617	10090.ENSMUSP00000004554	0.096	0	0	0	0.902	0.796	1	0.9	1	0.587	1	0.999
Rpl36	Rps14	5027972	5018277	10090.ENSMUSP00000079340	10090.ENSMUSP00000025511	0	0	0	0	0.861	0.945	1	0.9	1	0.722	1	0.999
Psma1	Psmb7	5020413	5018980	10090.ENSMUSP00000033008	10090.ENSMUSP00000028083	0	0	0	0	0.788	0.971	1	0.9	1	0.644	1	0.999
Rpl26	Rpl37	5026969	5023036	10090.ENSMUSP00000073175	10090.ENSMUSP00000046506	0	0	0	0	0.828	0.971	1	0.9	1	0.821	1	0.999
Rpl35a	Rpl37a	5033146	5025033	10090.ENSMUSP00000110731	10090.ENSMUSP00000058919	0	0	0	0	0.936	0.97	1	0.9	1	0.67	1	0.999
Rps25	Rpl7	5027947	5026693	10090.ENSMUSP00000079180	10090.ENSMUSP00000071616	0	0	0	0	0.999	0.846	1	0	0	0.653	1	0.999
Rpl31	Rps11	5036727	5015656	10090.ENSMUSP00000137631	10090.ENSMUSP00000003521	0	0	0	0	0.916	0.971	1	0	0	0.711	1	0.999
Rpl14	Rpl37a	5035620	5025033	10090.ENSMUSP00000131489	10090.ENSMUSP00000058919	0	0	0	0	0.917	0.862	1	0.9	1	0.572	1	0.999
Psma5	Psmc3	5028998	5026606	10090.ENSMUSP00000088057	10090.ENSMUSP00000071054	0.06	0	0	0	0.777	0.945	1	0.9	1	0.702	1	0.999
Rpl22	Rpl37	5034020	5023036	10090.ENSMUSP00000118787	10090.ENSMUSP00000046506	0	0	0	0	0.817	0.971	1	0.9	1	0.572	1	0.999
Rps25	Rps11	5027947	5015656	10090.ENSMUSP00000079180	10090.ENSMUSP00000003521	0	0	0	0	0.999	0.971	1	0.9	1	0.565	1	0.999
Rpl37a	Rpl8	5025033	5015714	10090.ENSMUSP00000058919	10090.ENSMUSP00000004072	0	0	0	0	0.936	0.97	1	0.9	1	0.528	1	0.999
Rpl6	Rps11	5020043	5015656	10090.ENSMUSP00000031617	10090.ENSMUSP00000003521	0.153	0	0	0	0.866	0.798	1	0.9	1	0.649	1	0.999
Rpl4	Rps3	5021039	5020408	10090.ENSMUSP00000034966	10090.ENSMUSP00000032998	0.17	0	0	0	0.999	0.8	1	0.9	1	0.73	1	0.999
Rpl23	Rps17	5030904	5028013	10090.ENSMUSP00000099435	10090.ENSMUSP00000079628	0	0	0	0	0.942	0.971	1	0	0	0.541	1	0.999
Rpl35a	Rps9	5033146	5015940	10090.ENSMUSP00000110731	10090.ENSMUSP00000006496	0	0	0	0	0.91	0.971	1	0.9	1	0.266	1	0.999
Rps3a1	Rps5	5019462	5015759	10090.ENSMUSP00000029722	10090.ENSMUSP00000004554	0	0	0	0	0.937	0.971	1	0.9	1	0.718	1	0.999
Rpl22	Rpl39	5034020	5033187	10090.ENSMUSP00000118787	10090.ENSMUSP00000110886	0	0	0	0	0.827	0.97	1	0.72	1	0.651	1	0.999
Rps28	Rps19	5033019	5031943	10090.ENSMUSP00000110013	10090.ENSMUSP00000104067	0	0	0	0	0.869	0.801	1	0.9	1	0.674	1	0.999
Rpl23	Rpl19	5030904	5016512	10090.ENSMUSP00000099435	10090.ENSMUSP00000017548	0.193	0	0.245	0	0.944	0.971	1	0.9	1	0.267	1	0.999
Rps6	Rpl5	5031125	5028222	10090.ENSMUSP00000099878	10090.ENSMUSP00000080854	0	0	0	0	0.999	0.874	1	0	0	0.827	1	0.999
Rps8	Rplp2	5031065	5028293	10090.ENSMUSP00000099757	10090.ENSMUSP00000081474	0	0	0	0	0.955	0.855	1	0.9	1	0.521	1	0.999
Rpl35a	Rpl10a	5033146	5023403	10090.ENSMUSP00000110731	10090.ENSMUSP00000048469	0	0	0	0	0.934	0.971	1	0.9	1	0.267	1	0.999
Rpl22	Rps19	5034020	5031943	10090.ENSMUSP00000118787	10090.ENSMUSP00000104067	0	0	0	0	0.831	0.896	1	0.9	1	0.852	1	0.999
Rps14	Rps9	5018277	5015940	10090.ENSMUSP00000025511	10090.ENSMUSP00000006496	0.164	0	0	0	0.928	0.97	1	0.9	1	0.743	1	0.999
Rps8	Rps15	5031065	5026344	10090.ENSMUSP00000099757	10090.ENSMUSP00000069004	0	0	0	0	0.874	0.958	1	0.72	1	0.684	1	0.999
Rpl23	Rps23	5030904	5024346	10090.ENSMUSP00000099435	10090.ENSMUSP00000054490	0.172	0	0.32	0	0.938	0.971	1	0.9	1	0.364	1	0.999
Rps21	Rps3a1	5024953	5019462	10090.ENSMUSP00000058432	10090.ENSMUSP00000029722	0	0	0	0	0.935	0.896	1	0.9	1	0.428	1	0.999
Psma3	Psmb4	5034579	5015885	10090.ENSMUSP00000125548	10090.ENSMUSP00000005923	0	0	0	0	0.815	0.96	1	0.9	1	0.838	1	0.999
Rpl22	Rps3a1	5034020	5019462	10090.ENSMUSP00000118787	10090.ENSMUSP00000029722	0	0	0	0	0.91	0.971	1	0.9	1	0.533	1	0.999
Rpl22	Rps5	5034020	5015759	10090.ENSMUSP00000118787	10090.ENSMUSP00000004554	0	0	0	0	0.863	0.971	1	0.9	1	0.514	1	0.999
Rpl38	Rps6	5031605	5031125	10090.ENSMUSP00000102213	10090.ENSMUSP00000099878	0	0	0	0	0.88	0.896	1	0.9	1	0.695	1	0.999
Rps25	Rps15	5027947	5026344	10090.ENSMUSP00000079180	10090.ENSMUSP00000069004	0	0	0	0	0.855	0.958	1	0.72	1	0.721	1	0.999
Rps28	Rpl32	5033019	5028158	10090.ENSMUSP00000110013	10090.ENSMUSP00000080523	0	0	0	0	0.913	0.958	1	0.9	1	0.477	1	0.999
Rpl32	Rps23	5028158	5024346	10090.ENSMUSP00000080523	10090.ENSMUSP00000054490	0	0	0	0	0.899	0.971	1	0.9	1	0.427	1	0.999
Rpl7	Rps11	5026693	5015656	10090.ENSMUSP00000071616	10090.ENSMUSP00000003521	0.164	0	0	0	0.999	0.96	1	0	0	0.363	1	0.999
Rpl35a	Rps19	5033146	5031943	10090.ENSMUSP00000110731	10090.ENSMUSP00000104067	0	0	0	0	0.896	0.896	1	0.9	1	0.931	1	0.999
Rps21	Rps9	5024953	5015940	10090.ENSMUSP00000058432	10090.ENSMUSP00000006496	0	0	0	0	0.923	0.889	1	0.9	1	0.346	1	0.999
Rps6	Rpl10a	5031125	5023403	10090.ENSMUSP00000099878	10090.ENSMUSP00000048469	0	0	0	0	0.999	0.971	1	0.9	1	0.507	1	0.999
Rps21	Rps5	5024953	5015759	10090.ENSMUSP00000058432	10090.ENSMUSP00000004554	0	0	0	0	0.951	0.896	1	0.9	1	0.644	1	0.999
Rpl37	Rps14	5023036	5018277	10090.ENSMUSP00000046506	10090.ENSMUSP00000025511	0	0	0	0	0.827	0.971	1	0.9	1	0.698	1	0.999
Rpl30	Rps5	5032315	5015759	10090.ENSMUSP00000106014	10090.ENSMUSP00000004554	0.172	0	0	0	0.893	0.971	1	0.9	1	0.657	1	0.999
Rpl26	Rps26	5026969	5018537	10090.ENSMUSP00000073175	10090.ENSMUSP00000026420	0	0	0	0	0.93	0.958	1	0	0	0.822	1	0.999
Psma1	Psma7	5020413	5019262	10090.ENSMUSP00000033008	10090.ENSMUSP00000029082	0	0	0.354	0.835	0.799	0.962	1	0.9	1	0.757	1	0.999
Psmc2	Psmb1	5019763	5016329	10090.ENSMUSP00000030769	10090.ENSMUSP00000014913	0	0	0	0	0.85	0.82	1	0.9	1	0.714	1	0.999
Rps26	Rps14	5018537	5018277	10090.ENSMUSP00000026420	10090.ENSMUSP00000025511	0	0	0	0	0.922	0.958	1	0.72	1	0.745	1	0.999
Rpl10a	Rps3	5023403	5020408	10090.ENSMUSP00000048469	10090.ENSMUSP00000032998	0.172	0	0	0	0.946	0.842	1	0.9	1	0.478	1	0.999
Rpl35a	Rps16	5033146	5031918	10090.ENSMUSP00000110731	10090.ENSMUSP00000103940	0	0	0	0	0.999	0.971	1	0	0	0.414	1	0.999
Rps20	Rps29	5034139	5021660	10090.ENSMUSP00000120528	10090.ENSMUSP00000038352	0.139	0	0	0	0.83	0.97	1	0.72	1	0.548	1	0.999
Rplp2	Rpl10a	5028293	5023403	10090.ENSMUSP00000081474	10090.ENSMUSP00000048469	0.119	0	0	0	0.902	0.86	1	0.9	1	0.545	1	0.999
Rpl14	Rpl26	5035620	5026969	10090.ENSMUSP00000131489	10090.ENSMUSP00000073175	0.107	0	0	0	0.912	0.853	1	0.9	1	0.669	1	0.999
Rps24	Rps6	5034648	5031125	10090.ENSMUSP00000125977	10090.ENSMUSP00000099878	0.182	0	0	0	0.999	0.97	1	0.72	1	0.772	1	0.999
Rps9	Rps5	5015940	5015759	10090.ENSMUSP00000006496	10090.ENSMUSP00000004554	0.164	0	0	0	0.91	0.972	1	0.9	1	0.706	1	0.999
Rps13	Rps11	5034698	5015656	10090.ENSMUSP00000126294	10090.ENSMUSP00000003521	0	0	0	0	0.999	0.972	1	0.9	1	0.766	1	0.999
Rps15a	Rpl19	5034103	5016512	10090.ENSMUSP00000119975	10090.ENSMUSP00000017548	0.193	0	0.272	0	0.93	0.972	1	0.9	1	0.361	1	0.999
Rpl32	Rps3	5028158	5020408	10090.ENSMUSP00000080523	10090.ENSMUSP00000032998	0.172	0	0	0	0.91	0.971	1	0.9	1	0.445	1	0.999
Rps6	Rps5	5031125	5015759	10090.ENSMUSP00000099878	10090.ENSMUSP00000004554	0	0	0	0	0.941	0.971	1	0.9	1	0.491	1	0.999
Rps20	Rps3	5034139	5020408	10090.ENSMUSP00000120528	10090.ENSMUSP00000032998	0.172	0	0	0	0.917	0.972	1	0.72	1	0.851	1	0.999
Rpl26	Rps11	5026969	5015656	10090.ENSMUSP00000073175	10090.ENSMUSP00000003521	0.172	0	0.226	0	0.96	0.971	1	0.9	1	0.43	1	0.999
Rps13	Rps8	5034698	5031065	10090.ENSMUSP00000126294	10090.ENSMUSP00000099757	0	0	0	0	0.912	0.971	1	0.9	1	0.833	1	0.999
Rpl35a	Rpl26	5033146	5026969	10090.ENSMUSP00000110731	10090.ENSMUSP00000073175	0	0	0	0	0.941	0.97	1	0.9	1	0.875	1	0.999
Rps15a	Rpl3	5034103	5028126	10090.ENSMUSP00000119975	10090.ENSMUSP00000080354	0.17	0	0.244	0	0.913	0.858	1	0.9	1	0.679	1	0.999
Psma6	Psmb6	5017199	5016580	10090.ENSMUSP00000021412	10090.ENSMUSP00000018430	0	0	0	0	0.771	0.961	1	0.9	1	0.65	1	0.999
Rps15a	Rps14	5034103	5018277	10090.ENSMUSP00000119975	10090.ENSMUSP00000025511	0.172	0	0.317	0	0.999	0.971	1	0.9	1	0.727	1	0.999
Rpl23	Rps25	5030904	5027947	10090.ENSMUSP00000099435	10090.ENSMUSP00000079180	0	0	0	0	0.999	0.971	1	0.9	1	0.214	1	0.999
Psma4	Psmb4	5020992	5015885	10090.ENSMUSP00000034848	10090.ENSMUSP00000005923	0	0	0	0	0.834	0.961	1	0.9	1	0.648	1	0.999
Rps16	Rps25	5031918	5027947	10090.ENSMUSP00000103940	10090.ENSMUSP00000079180	0	0	0	0	0.939	0.971	1	0.72	1	0.507	1	0.999
Rps10	Rps23	5033114	5024346	10090.ENSMUSP00000110532	10090.ENSMUSP00000054490	0	0	0	0	0.817	0.958	1	0.72	1	0.598	1	0.999
Rps6	Rps3a1	5031125	5019462	10090.ENSMUSP00000099878	10090.ENSMUSP00000029722	0.042	0	0	0	0.942	0.971	1	0.9	1	0.749	1	0.999
Rpl34	Rps25	5028844	5027947	10090.ENSMUSP00000086614	10090.ENSMUSP00000079180	0	0	0	0	0.916	0.801	1	0.9	1	0.612	1	0.999
Rpl14	Rps23	5035620	5024346	10090.ENSMUSP00000131489	10090.ENSMUSP00000054490	0.088	0	0	0	0.881	0.866	1	0.9	1	0.653	1	0.999
Rpl37a	Rps21	5025033	5024953	10090.ENSMUSP00000058919	10090.ENSMUSP00000058432	0	0	0	0	0.971	0.889	1	0.9	1	0.502	1	0.999
Rpl32	Rps25	5028158	5027947	10090.ENSMUSP00000080523	10090.ENSMUSP00000079180	0	0	0	0	0.911	0.971	1	0.9	1	0.472	1	0.999
Rpl31	Rps17	5036727	5028013	10090.ENSMUSP00000137631	10090.ENSMUSP00000079628	0	0	0	0	0.914	0.971	1	0	0	0.814	1	0.999
Rpl22	Rps11	5034020	5015656	10090.ENSMUSP00000118787	10090.ENSMUSP00000003521	0	0	0	0	0.914	0.971	1	0.9	1	0.309	1	0.999
Rps13	Rps16	5034698	5031918	10090.ENSMUSP00000126294	10090.ENSMUSP00000103940	0	0	0	0	0.916	0.971	1	0.72	1	0.668	1	0.999
Rps19	Rps16	5031943	5031918	10090.ENSMUSP00000104067	10090.ENSMUSP00000103940	0	0	0	0	0.927	0.896	1	0.54	1	0.762	1	0.999
Rpl14	Rps3	5035620	5020408	10090.ENSMUSP00000131489	10090.ENSMUSP00000032998	0.153	0	0	0	0.913	0.815	1	0.9	1	0.696	1	0.999
Rps21	Rpl8	5024953	5015714	10090.ENSMUSP00000058432	10090.ENSMUSP00000004072	0	0	0	0	0.958	0.89	1	0.9	1	0.566	1	0.999
Psmc3	Psmd8	5026606	5023901	10090.ENSMUSP00000071054	10090.ENSMUSP00000051657	0	0	0	0	0.833	0.82	1	0.9	1	0.751	1	0.999
Rpl31	Rps26	5036727	5018537	10090.ENSMUSP00000137631	10090.ENSMUSP00000026420	0	0	0	0	0.862	0.958	1	0.72	1	0.684	1	0.999
Rpl23	Rpl32	5030904	5028158	10090.ENSMUSP00000099435	10090.ENSMUSP00000080523	0.172	0	0	0	0.938	0.971	1	0.9	1	0.483	1	0.999
Rplp2	Rpl26	5028293	5026969	10090.ENSMUSP00000081474	10090.ENSMUSP00000073175	0	0	0	0	0.897	0.851	1	0.9	1	0.568	1	0.999
Rps20	Rps6	5034139	5031125	10090.ENSMUSP00000120528	10090.ENSMUSP00000099878	0	0	0	0	0.91	0.97	1	0.72	1	0.692	1	0.999
Rpl23	Rpl5	5030904	5028222	10090.ENSMUSP00000099435	10090.ENSMUSP00000080854	0.193	0	0	0	0.999	0.867	1	0.72	1	0.622	1	0.999
Rplp2	Rps21	5028293	5024953	10090.ENSMUSP00000081474	10090.ENSMUSP00000058432	0	0	0	0	0.938	0.856	1	0.9	1	0.378	1	0.999
Rpl35a	Rpl8	5033146	5015714	10090.ENSMUSP00000110731	10090.ENSMUSP00000004072	0	0	0	0	0.938	0.971	1	0.9	1	0.209	1	0.999
Rps3a1	Rps14	5019462	5018277	10090.ENSMUSP00000029722	10090.ENSMUSP00000025511	0	0	0.218	0	0.936	0.97	1	0.9	1	0.781	1	0.999
Rpl22	Rps6	5034020	5031125	10090.ENSMUSP00000118787	10090.ENSMUSP00000099878	0	0	0	0	0.913	0.971	1	0.9	1	0.807	1	0.999
Rps13	Rpl35a	5034698	5033146	10090.ENSMUSP00000126294	10090.ENSMUSP00000110731	0	0	0	0	0.999	0.971	1	0.9	1	0.439	1	0.999
Rps17	Rps23	5028013	5024346	10090.ENSMUSP00000079628	10090.ENSMUSP00000054490	0	0	0	0	0.911	0.972	1	0.72	1	0.719	1	0.999
Rpl18	Rps8	5031793	5031065	10090.ENSMUSP00000103365	10090.ENSMUSP00000099757	0	0	0	0	0.959	0.866	1	0.9	1	0.337	1	0.999
Rps28	Rpl38	5033019	5031605	10090.ENSMUSP00000110013	10090.ENSMUSP00000102213	0	0	0	0	0.93	0.801	1	0.9	1	0.759	1	0.999
Rpl18	Rps11	5031793	5015656	10090.ENSMUSP00000103365	10090.ENSMUSP00000003521	0	0	0	0	0.929	0.97	1	0.9	1	0.676	1	0.999
Rps15a	Rps28	5034103	5033019	10090.ENSMUSP00000119975	10090.ENSMUSP00000110013	0	0	0	0	0.857	0.958	1	0.9	1	0.712	1	0.999
Rps27a	Rps8	5031143	5031065	10090.ENSMUSP00000099909	10090.ENSMUSP00000099757	0	0	0	0	0.929	0.896	1	0.9	1	0.151	1	0.999
Psmb2	Psmb4	5019726	5015885	10090.ENSMUSP00000030642	10090.ENSMUSP00000005923	0	0	0	0.628	0.878	0.961	1	0.9	1	0.882	1	0.999
Rps19	Rpl18	5031943	5031793	10090.ENSMUSP00000104067	10090.ENSMUSP00000103365	0	0.371	0	0	0.955	0.887	1	0.9	1	0.609	1	0.999
Uqcrc2	Cyc1	5020466	5017751	10090.ENSMUSP00000033176	10090.ENSMUSP00000023210	0	0	0	0	0.88	0.903	1	0.9	1	0.792	1	0.999
Rpl22	Rps9	5034020	5015940	10090.ENSMUSP00000118787	10090.ENSMUSP00000006496	0	0	0	0	0.822	0.971	1	0.9	1	0.755	1	0.999
Rps23	Rpl4	5024346	5021039	10090.ENSMUSP00000054490	10090.ENSMUSP00000034966	0.139	0	0	0	0.883	0.846	1	0.9	1	0.735	1	0.999
Rps8	Rps29	5031065	5021660	10090.ENSMUSP00000099757	10090.ENSMUSP00000038352	0	0	0	0	0.913	0.96	1	0.72	1	0.656	1	0.999
Psmb6	Psmb1	5016580	5016329	10090.ENSMUSP00000018430	10090.ENSMUSP00000014913	0	0	0	0	0.907	0.96	1	0.9	1	0.687	1	0.999
Rpl5	Rps25	5028222	5027947	10090.ENSMUSP00000080854	10090.ENSMUSP00000079180	0	0	0	0	0.999	0.876	1	0	0	0.851	1	0.999
Rps25	Rps3a1	5027947	5019462	10090.ENSMUSP00000079180	10090.ENSMUSP00000029722	0	0	0	0	0.999	0.971	1	0.9	1	0.743	1	0.999
Atp5k	Atp5e	5023828	5016447	10090.ENSMUSP00000051222	10090.ENSMUSP00000016396	0	0	0	0	0.889	0.789	1	0.9	1	0.626	1	0.999
Rps6	Rpl26	5031125	5026969	10090.ENSMUSP00000099878	10090.ENSMUSP00000073175	0	0	0	0	0.934	0.971	1	0.9	1	0.763	1	0.999
Uqcr10	Cyc1	5024399	5017751	10090.ENSMUSP00000054856	10090.ENSMUSP00000023210	0	0	0	0	0.834	0.912	1	0.9	1	0.736	1	0.999
Rps13	Rps24	5034698	5034648	10090.ENSMUSP00000126294	10090.ENSMUSP00000125977	0.171	0	0	0	0.999	0.97	1	0.72	1	0.724	1	0.999
Rpl39	Rps28	5033187	5033019	10090.ENSMUSP00000110886	10090.ENSMUSP00000110013	0	0	0	0	0.845	0.958	1	0.72	1	0.607	1	0.999
Rps27a	Rps6	5031143	5031125	10090.ENSMUSP00000099909	10090.ENSMUSP00000099878	0	0	0	0	0.899	0.896	1	0.9	1	0.242	1	0.999
Rpl39	Rpl23	5033187	5030904	10090.ENSMUSP00000110886	10090.ENSMUSP00000099435	0.046	0	0	0	0.912	0.97	1	0.72	1	0.215	1	0.999
Rpl23	Rpl37a	5030904	5025033	10090.ENSMUSP00000099435	10090.ENSMUSP00000058919	0	0	0	0	0.961	0.97	1	0.9	1	0.127	1	0.999
Rps24	Rpl19	5034648	5016512	10090.ENSMUSP00000125977	10090.ENSMUSP00000017548	0	0	0	0	0.909	0.97	1	0	0	0.738	1	0.999
Rps25	Rps18	5027947	5016094	10090.ENSMUSP00000079180	10090.ENSMUSP00000008812	0	0	0	0	0.844	0.95	1	0.9	1	0.304	1	0.999
Psmc3	Psmc2	5026606	5019763	10090.ENSMUSP00000071054	10090.ENSMUSP00000030769	0	0	0.276	0.881	0.877	0.972	1	0.9	1	0.856	1	0.999
Rpl35a	Rpl19	5033146	5016512	10090.ENSMUSP00000110731	10090.ENSMUSP00000017548	0	0	0	0	0.939	0.971	1	0.9	1	0.603	1	0.999
Rpsa	Rps3	5021080	5020408	10090.ENSMUSP00000035105	10090.ENSMUSP00000032998	0.165	0	0	0	0.823	0.958	1	0.72	1	0.595	1	0.999
Rps15a	Rps27a	5034103	5031143	10090.ENSMUSP00000119975	10090.ENSMUSP00000099909	0	0	0	0	0.896	0.896	1	0.9	1	0.426	1	0.999
Psmb2	Psmb5	5019726	5017622	10090.ENSMUSP00000030642	10090.ENSMUSP00000022803	0	0	0	0	0.793	0.967	1	0.9	1	0.838	1	0.999
Rpl18	Rps3	5031793	5020408	10090.ENSMUSP00000103365	10090.ENSMUSP00000032998	0	0	0	0	0.938	0.829	1	0.9	1	0.651	1	0.999
Rpl26	Rpl6	5026969	5020043	10090.ENSMUSP00000073175	10090.ENSMUSP00000031617	0.107	0	0	0	0.916	0.795	1	0.9	1	0.764	1	0.999
Rps17	Rps21	5028013	5024953	10090.ENSMUSP00000079628	10090.ENSMUSP00000058432	0	0	0	0	0.947	0.896	1	0.72	1	0.682	1	0.999
Psmb9	Psma2	5035932	5035328	10090.ENSMUSP00000133499	10090.ENSMUSP00000129767	0	0	0	0	0.77	0.949	1	0.9	1	0.542	1	0.999
Rpl31	Rpl8	5036727	5015714	10090.ENSMUSP00000137631	10090.ENSMUSP00000004072	0	0	0	0	0.879	0.971	1	0.72	1	0.484	1	0.999
Rpl31	Rpl39	5036727	5033187	10090.ENSMUSP00000137631	10090.ENSMUSP00000110886	0	0	0	0	0.881	0.97	1	0.72	1	0.701	1	0.999
Rps15a	Rpl36	5034103	5027972	10090.ENSMUSP00000119975	10090.ENSMUSP00000079340	0	0	0	0	0.771	0.95	1	0.9	1	0.537	1	0.999
Rpl10a	Rpl4	5023403	5021039	10090.ENSMUSP00000048469	10090.ENSMUSP00000034966	0.139	0	0	0	0.938	0.82	1	0.9	1	0.51	1	0.999
Rps19	Rps3	5031943	5020408	10090.ENSMUSP00000104067	10090.ENSMUSP00000032998	0	0	0	0	0.963	0.889	1	0.9	1	0.76	1	0.999
Rps15	Rps14	5026344	5018277	10090.ENSMUSP00000069004	10090.ENSMUSP00000025511	0.164	0	0.246	0	0.867	0.958	1	0.72	1	0.747	1	0.999
Rps15	Rps23	5026344	5024346	10090.ENSMUSP00000069004	10090.ENSMUSP00000054490	0.164	0	0.221	0	0.827	0.958	1	0.72	1	0.691	1	0.999
Rpl37a	Rpl19	5025033	5016512	10090.ENSMUSP00000058919	10090.ENSMUSP00000017548	0	0	0	0	0.963	0.97	1	0.9	1	0.588	1	0.999
Rps17	Rps29	5028013	5021660	10090.ENSMUSP00000079628	10090.ENSMUSP00000038352	0	0	0	0	0.911	0.971	1	0.72	1	0.773	1	0.999
Rpl38	Rpl32	5031605	5028158	10090.ENSMUSP00000102213	10090.ENSMUSP00000080523	0	0	0	0	0.936	0.896	1	0.9	1	0.44	1	0.999
Rps13	Rps23	5034698	5024346	10090.ENSMUSP00000126294	10090.ENSMUSP00000054490	0.043	0	0	0	0.897	0.971	1	0.9	1	0.66	1	0.999
Dld	Dlst	5032391	5025255	10090.ENSMUSP00000106481	10090.ENSMUSP00000060346	0.077	0	0.404	0	0.805	0.752	1	0.9	1	0.841	1	0.999
Rps16	Rpl8	5031918	5015714	10090.ENSMUSP00000103940	10090.ENSMUSP00000004072	0.139	0	0	0	0.941	0.971	1	0	0	0.803	1	0.999
Rps28	Rpl19	5033019	5016512	10090.ENSMUSP00000110013	10090.ENSMUSP00000017548	0	0	0	0	0.933	0.958	1	0.9	1	0.502	1	0.999
Rps18	Rps5	5016094	5015759	10090.ENSMUSP00000008812	10090.ENSMUSP00000004554	0.139	0	0	0	0.829	0.95	1	0.9	1	0.625	1	0.999
Rpl39	Rpl10a	5033187	5023403	10090.ENSMUSP00000110886	10090.ENSMUSP00000048469	0.096	0	0	0	0.836	0.97	1	0.72	1	0.313	1	0.999
Rpl32	Rpl19	5028158	5016512	10090.ENSMUSP00000080523	10090.ENSMUSP00000017548	0.172	0	0	0	0.96	0.971	1	0.9	1	0.596	1	0.999
Rps16	Rps15	5031918	5026344	10090.ENSMUSP00000103940	10090.ENSMUSP00000069004	0.139	0	0	0	0.87	0.958	1	0.72	1	0.665	1	0.999
Rps13	Rpl22	5034698	5034020	10090.ENSMUSP00000126294	10090.ENSMUSP00000118787	0	0	0	0	0.818	0.971	1	0.9	1	0.803	1	0.999
Rps15a	Rps25	5034103	5027947	10090.ENSMUSP00000119975	10090.ENSMUSP00000079180	0	0	0	0	0.999	0.972	1	0.9	1	0.663	1	0.999
Psma4	Psmb1	5020992	5016329	10090.ENSMUSP00000034848	10090.ENSMUSP00000014913	0	0	0	0	0.911	0.96	1	0.9	1	0.742	1	0.999
Rps18	Rps11	5016094	5015656	10090.ENSMUSP00000008812	10090.ENSMUSP00000003521	0.17	0	0	0	0.834	0.95	1	0.9	1	0.679	1	0.999
Rpl37a	Rpl10a	5025033	5023403	10090.ENSMUSP00000058919	10090.ENSMUSP00000048469	0	0	0	0	0.957	0.97	1	0.9	1	0.327	1	0.999
Psma3	Psma7	5034579	5019262	10090.ENSMUSP00000125548	10090.ENSMUSP00000029082	0	0	0.427	0.805	0.784	0.958	1	0.9	1	0.748	1	0.999
Rps15a	Rpl26	5034103	5026969	10090.ENSMUSP00000119975	10090.ENSMUSP00000073175	0.172	0	0.281	0	0.999	0.971	1	0.9	1	0.535	1	0.999
Rps26-ps1	Rps14	5027499	5018277	10090.ENSMUSP00000076447	10090.ENSMUSP00000025511	0	0	0	0	0.781	0.958	1	0.72	1	0.745	1	0.999
Rps16	Rps6	5031918	5031125	10090.ENSMUSP00000103940	10090.ENSMUSP00000099878	0	0	0	0	0.933	0.971	1	0.72	1	0.751	1	0.999
Psma7	Psma6	5019262	5017199	10090.ENSMUSP00000029082	10090.ENSMUSP00000021412	0	0	0.403	0.82	0.802	0.952	1	0.9	1	0.737	1	0.999
Rpl22	Rps14	5034020	5018277	10090.ENSMUSP00000118787	10090.ENSMUSP00000025511	0	0	0	0	0.827	0.97	1	0.9	1	0.839	1	0.999
Rpl39	Rps29	5033187	5021660	10090.ENSMUSP00000110886	10090.ENSMUSP00000038352	0	0	0	0	0.861	0.963	1	0.72	1	0.655	1	0.999
Psma3	Psma1	5034579	5020413	10090.ENSMUSP00000125548	10090.ENSMUSP00000033008	0	0	0.304	0.733	0.909	0.977	1	0.9	1	0.845	1	0.999
Rpl35a	Rpl18	5033146	5031793	10090.ENSMUSP00000110731	10090.ENSMUSP00000103365	0	0	0	0	0.908	0.869	1	0.9	1	0.506	1	0.999
Rpl10a	Rpl37	5023403	5023036	10090.ENSMUSP00000048469	10090.ENSMUSP00000046506	0	0	0	0	0.824	0.971	1	0.9	1	0.592	1	0.999
Rps8	Rps14	5031065	5018277	10090.ENSMUSP00000099757	10090.ENSMUSP00000025511	0	0	0	0	0.944	0.97	1	0.9	1	0.804	1	0.999
Rps29	Rps14	5021660	5018277	10090.ENSMUSP00000038352	10090.ENSMUSP00000025511	0.139	0	0	0	0.907	0.962	1	0.72	1	0.757	1	0.999
Rpl31	Rps14	5036727	5018277	10090.ENSMUSP00000137631	10090.ENSMUSP00000025511	0	0	0	0	0.911	0.97	1	0	0	0.784	1	0.999
Rpl38	Rpl23	5031605	5030904	10090.ENSMUSP00000102213	10090.ENSMUSP00000099435	0	0	0	0	0.935	0.896	1	0.9	1	0.269	1	0.999
Rpl38	Rps29	5031605	5021660	10090.ENSMUSP00000102213	10090.ENSMUSP00000038352	0	0	0	0	0.934	0.894	1	0.72	1	0.762	1	0.999
Rps10	Rps3a1	5033114	5019462	10090.ENSMUSP00000110532	10090.ENSMUSP00000029722	0	0	0	0	0.813	0.958	1	0.72	1	0.648	1	0.999
Rps23	Rps11	5024346	5015656	10090.ENSMUSP00000054490	10090.ENSMUSP00000003521	0.172	0	0	0	0.928	0.972	1	0.9	1	0.485	1	0.999
Rps3	Rps11	5020408	5015656	10090.ENSMUSP00000032998	10090.ENSMUSP00000003521	0.193	0	0	0	0.958	0.972	1	0.9	1	0.727	1	0.999
Rps24	Rps9	5034648	5015940	10090.ENSMUSP00000125977	10090.ENSMUSP00000006496	0	0	0	0	0.836	0.97	1	0.72	1	0.633	1	0.999
Rps16	Rpl32	5031918	5028158	10090.ENSMUSP00000103940	10090.ENSMUSP00000080523	0	0	0	0	0.91	0.971	1	0	0	0.711	1	0.999
Rpl26	Rps14	5026969	5018277	10090.ENSMUSP00000073175	10090.ENSMUSP00000025511	0.164	0	0.364	0	0.933	0.97	1	0.9	1	0.874	1	0.999
Cox5b	Cyc1	5028064	5017751	10090.ENSMUSP00000079944	10090.ENSMUSP00000023210	0	0	0	0	0.902	0.729	1	0.9	1	0.684	1	0.999
Rps6	Rps25	5031125	5027947	10090.ENSMUSP00000099878	10090.ENSMUSP00000079180	0	0	0	0	0.938	0.971	1	0.9	1	0.727	1	0.999
Rps6	Rps17	5031125	5028013	10090.ENSMUSP00000099878	10090.ENSMUSP00000079628	0	0	0	0	0.91	0.971	1	0.72	1	0.721	1	0.999
Psmb10	Psma6	5020832	5017199	10090.ENSMUSP00000034369	10090.ENSMUSP00000021412	0	0	0.246	0	0.762	0.943	1	0.9	1	0.564	1	0.999
Rps18	Rps9	5016094	5015940	10090.ENSMUSP00000008812	10090.ENSMUSP00000006496	0.139	0	0	0	0.768	0.95	1	0.9	1	0.608	1	0.999
Rps8	Rpl8	5031065	5015714	10090.ENSMUSP00000099757	10090.ENSMUSP00000004072	0	0	0	0	0.986	0.971	1	0.9	1	0.719	1	0.999
Rps20	Rps23	5034139	5024346	10090.ENSMUSP00000120528	10090.ENSMUSP00000054490	0.164	0	0	0	0.891	0.972	1	0.72	1	0.665	1	0.999
Rpl26	Rpl13	5026969	5015324	10090.ENSMUSP00000073175	10090.ENSMUSP00000000756	0	0	0	0	0.945	0.801	1	0.9	1	0.246	1	0.999
Rps25	Rpl37a	5027947	5025033	10090.ENSMUSP00000079180	10090.ENSMUSP00000058919	0	0	0	0	0.999	0.97	1	0.9	1	0.165	1	0.999
Rps15a	Rps15	5034103	5026344	10090.ENSMUSP00000119975	10090.ENSMUSP00000069004	0.172	0	0	0	0.821	0.958	1	0.72	1	0.592	1	0.999
Rpl26	Rps29	5026969	5021660	10090.ENSMUSP00000073175	10090.ENSMUSP00000038352	0.139	0	0	0	0.914	0.971	1	0	0	0.752	1	0.999
Psma4	Psma1	5020992	5020413	10090.ENSMUSP00000034848	10090.ENSMUSP00000033008	0	0	0.215	0.749	0.917	0.978	1	0.9	1	0.801	1	0.999
Rps3a1	Rps9	5019462	5015940	10090.ENSMUSP00000029722	10090.ENSMUSP00000006496	0	0	0	0	0.929	0.971	1	0.9	1	0.631	1	0.999
Rps19	Rpl19	5031943	5016512	10090.ENSMUSP00000104067	10090.ENSMUSP00000017548	0	0	0	0	0.942	0.894	1	0.9	1	0.62	1	0.999
Rpl37a	Rps3a1	5025033	5019462	10090.ENSMUSP00000058919	10090.ENSMUSP00000029722	0	0	0	0	0.933	0.97	1	0.9	1	0.308	1	0.999
Rpl37a	Rps11	5025033	5015656	10090.ENSMUSP00000058919	10090.ENSMUSP00000003521	0	0	0	0	0.953	0.97	1	0.9	1	0.57	1	0.999
Rps20	Rps9	5034139	5015940	10090.ENSMUSP00000120528	10090.ENSMUSP00000006496	0.164	0	0	0	0.883	0.972	1	0.72	1	0.511	1	0.999
Psmb3	Psmb2	5030905	5019726	10090.ENSMUSP00000099436	10090.ENSMUSP00000030642	0	0	0	0	0.828	0.944	1	0.9	1	0.821	1	0.999
Psmb9	Psma5	5035932	5028998	10090.ENSMUSP00000133499	10090.ENSMUSP00000088057	0	0	0.215	0	0.659	0.93	1	0.9	1	0.582	1	0.999
Rps24	Rps3a1	5034648	5019462	10090.ENSMUSP00000125977	10090.ENSMUSP00000029722	0.057	0	0	0	0.999	0.889	1	0.72	1	0.699	1	0.999
Rps24	Rps14	5034648	5018277	10090.ENSMUSP00000125977	10090.ENSMUSP00000025511	0	0	0	0	0.923	0.97	1	0.72	1	0.887	1	0.999
Dlat	Pdhb	5020906	5017460	10090.ENSMUSP00000034567	10090.ENSMUSP00000022268	0.119	0	0.436	0	0.827	0.791	1	0.9	1	0.878	1	0.999
Rps20	Rps14	5034139	5018277	10090.ENSMUSP00000120528	10090.ENSMUSP00000025511	0.164	0	0	0	0.912	0.97	1	0.72	1	0.84	1	0.999
Psma2	Psma6	5035328	5017199	10090.ENSMUSP00000129767	10090.ENSMUSP00000021412	0	0	0.39	0.842	0.916	0.971	1	0.9	1	0.834	1	0.999
Rpl31	Rpl32	5036727	5028158	10090.ENSMUSP00000137631	10090.ENSMUSP00000080523	0	0	0	0	0.909	0.97	1	0.72	1	0.624	1	0.999
Vps26b	Vps35	5020872	5020747	10090.ENSMUSP00000034470	10090.ENSMUSP00000034131	0	0	0	0	0.252	0.91	1	0.9	1	0.91	1	0.999
Rps28	Rps5	5033019	5015759	10090.ENSMUSP00000110013	10090.ENSMUSP00000004554	0	0	0	0	0.912	0.958	1	0.9	1	0.685	1	0.999
Rps15a	Rps11	5034103	5015656	10090.ENSMUSP00000119975	10090.ENSMUSP00000003521	0.193	0	0.203	0	0.999	0.972	1	0.9	1	0.731	1	0.999
Rpl14	Rpl6	5035620	5020043	10090.ENSMUSP00000131489	10090.ENSMUSP00000031617	0	0	0	0	0.822	0.78	1	0.9	1	0.788	1	0.999
Rps23	Rps18	5024346	5016094	10090.ENSMUSP00000054490	10090.ENSMUSP00000008812	0.139	0	0	0	0.805	0.95	1	0.9	1	0.502	1	0.999
Rpl38	Rplp2	5031605	5028293	10090.ENSMUSP00000102213	10090.ENSMUSP00000081474	0	0	0	0	0.937	0.859	1	0.9	1	0.71	1	0.999
Rpl18	Rpl13	5031793	5015324	10090.ENSMUSP00000103365	10090.ENSMUSP00000000756	0	0	0	0	0.918	0.787	1	0.9	1	0.661	1	0.999
Rps24	Rpl37a	5034648	5025033	10090.ENSMUSP00000125977	10090.ENSMUSP00000058919	0	0	0	0	0.942	0.97	1	0	0	0.647	1	0.999
Rps6	Rpl32	5031125	5028158	10090.ENSMUSP00000099878	10090.ENSMUSP00000080523	0	0	0	0	0.909	0.971	1	0.9	1	0.591	1	0.999
Rpl35a	Rpl37	5033146	5023036	10090.ENSMUSP00000110731	10090.ENSMUSP00000046506	0	0	0	0	0.86	0.971	1	0.9	1	0.546	1	0.999
Rpl5	Rpl26	5028222	5026969	10090.ENSMUSP00000080854	10090.ENSMUSP00000073175	0.172	0	0.235	0	0.999	0.858	1	0.72	1	0.894	1	0.999
Rps13	Rps29	5034698	5021660	10090.ENSMUSP00000126294	10090.ENSMUSP00000038352	0	0	0	0	0.806	0.971	1	0.72	1	0.67	1	0.999
Rps28	Rpl36	5033019	5027972	10090.ENSMUSP00000110013	10090.ENSMUSP00000079340	0	0	0	0	0.891	0.939	1	0.9	1	0.39	1	0.999
Rps20	Rpl35a	5034139	5033146	10090.ENSMUSP00000120528	10090.ENSMUSP00000110731	0	0	0	0	0.999	0.97	1	0	0	0.752	1	0.999
Rps24	Rps25	5034648	5027947	10090.ENSMUSP00000125977	10090.ENSMUSP00000079180	0	0	0	0	0.999	0.97	1	0.72	1	0.82	1	0.999
Rps26	Rps11	5018537	5015656	10090.ENSMUSP00000026420	10090.ENSMUSP00000003521	0	0	0	0	0.945	0.958	1	0.72	1	0.33	1	0.999
Rpl35a	Rps23	5033146	5024346	10090.ENSMUSP00000110731	10090.ENSMUSP00000054490	0	0	0	0	0.881	0.971	1	0.9	1	0.318	1	0.999
Rps19	Rpl32	5031943	5028158	10090.ENSMUSP00000104067	10090.ENSMUSP00000080523	0	0	0	0	0.91	0.896	1	0.9	1	0.393	1	0.999
Rps24	Rpl35a	5034648	5033146	10090.ENSMUSP00000125977	10090.ENSMUSP00000110731	0	0	0	0	0.902	0.97	1	0	0	0.933	1	0.999
Rps6	Rps21	5031125	5024953	10090.ENSMUSP00000099878	10090.ENSMUSP00000058432	0	0	0	0	0.909	0.887	1	0.9	1	0.535	1	0.999
Rpl32	Rpl37a	5028158	5025033	10090.ENSMUSP00000080523	10090.ENSMUSP00000058919	0	0	0	0	0.959	0.97	1	0.9	1	0.398	1	0.999
Rps13	Rps14	5034698	5018277	10090.ENSMUSP00000126294	10090.ENSMUSP00000025511	0.042	0	0.268	0	0.911	0.971	1	0.9	1	0.673	1	0.999
Rps28	Rps26	5033019	5018537	10090.ENSMUSP00000110013	10090.ENSMUSP00000026420	0	0	0	0	0.955	0.945	1	0.72	1	0.653	1	0.999
Rps6	Rps8	5031125	5031065	10090.ENSMUSP00000099878	10090.ENSMUSP00000099757	0	0	0	0	0.952	0.971	1	0.9	1	0.816	1	0.999
Psma7	Psmb5	5019262	5017622	10090.ENSMUSP00000029082	10090.ENSMUSP00000022803	0	0	0	0	0.772	0.952	1	0.9	1	0.694	1	0.999
Rps29	Rps3a1	5021660	5019462	10090.ENSMUSP00000038352	10090.ENSMUSP00000029722	0	0	0	0	0.838	0.961	1	0.72	1	0.574	1	0.999
Rps28	Rpl23	5033019	5030904	10090.ENSMUSP00000110013	10090.ENSMUSP00000099435	0	0	0	0	0.907	0.958	1	0.9	1	0.14	1	0.999
Rpl3	Rpl7	5028126	5026693	10090.ENSMUSP00000080354	10090.ENSMUSP00000071616	0.098	0	0	0	0.999	0.818	1	0.72	1	0.743	1	0.999
Rpl23	Rps9	5030904	5015940	10090.ENSMUSP00000099435	10090.ENSMUSP00000006496	0.172	0	0	0	0.921	0.971	1	0.9	1	0.74	1	0.999
Rps27a	Rps3a1	5031143	5019462	10090.ENSMUSP00000099909	10090.ENSMUSP00000029722	0	0	0	0	0.928	0.894	1	0.9	1	0.115	1	0.999
Rpl23	Rpl10a	5030904	5023403	10090.ENSMUSP00000099435	10090.ENSMUSP00000048469	0.172	0	0	0	0.999	0.971	1	0.9	1	0.323	1	0.999
Rpl30	Rps11	5032315	5015656	10090.ENSMUSP00000106014	10090.ENSMUSP00000003521	0	0	0	0	0.939	0.971	1	0.9	1	0.63	1	0.999
Rps21	Rpl19	5024953	5016512	10090.ENSMUSP00000058432	10090.ENSMUSP00000017548	0	0	0	0	0.948	0.894	1	0.9	1	0.272	1	0.999
Rps17	Rps26	5028013	5018537	10090.ENSMUSP00000079628	10090.ENSMUSP00000026420	0	0	0	0	0.951	0.958	1	0.72	1	0.844	1	0.999
Rpl35a	Rps14	5033146	5018277	10090.ENSMUSP00000110731	10090.ENSMUSP00000025511	0	0	0	0	0.938	0.97	1	0.9	1	0.852	1	0.999
Rpl3	Rpl8	5028126	5015714	10090.ENSMUSP00000080354	10090.ENSMUSP00000004072	0.139	0	0	0	0.999	0.87	1	0.9	1	0.768	1	0.999
Rps20	Rps8	5034139	5031065	10090.ENSMUSP00000120528	10090.ENSMUSP00000099757	0	0	0	0	0.999	0.97	1	0.72	1	0.552	1	0.999
Rpl22	Rps28	5034020	5033019	10090.ENSMUSP00000118787	10090.ENSMUSP00000110013	0	0	0	0	0.799	0.958	1	0.9	1	0.485	1	0.999
Rpl3	Rpl26	5028126	5026969	10090.ENSMUSP00000080354	10090.ENSMUSP00000073175	0.139	0	0.25	0	0.925	0.856	1	0.9	1	0.755	1	0.999
Rpl32	Rps21	5028158	5024953	10090.ENSMUSP00000080523	10090.ENSMUSP00000058432	0	0	0	0	0.954	0.896	1	0.9	1	0.112	1	0.999
Rps15a	Rpl37a	5034103	5025033	10090.ENSMUSP00000119975	10090.ENSMUSP00000058919	0	0	0	0	0.999	0.97	1	0.9	1	0.123	1	0.999
Psmb6	Psmb4	5016580	5015885	10090.ENSMUSP00000018430	10090.ENSMUSP00000005923	0	0	0	0	0.867	0.961	1	0.9	1	0.764	1	0.999
Rpl18	Rps18	5031793	5016094	10090.ENSMUSP00000103365	10090.ENSMUSP00000008812	0.17	0	0	0	0.825	0.95	1	0.9	1	0.469	1	0.999
Psma3	Psmb1	5034579	5016329	10090.ENSMUSP00000125548	10090.ENSMUSP00000014913	0	0	0.308	0	0.838	0.96	1	0.9	1	0.744	1	0.999
Rps18	Rpl8	5016094	5015714	10090.ENSMUSP00000008812	10090.ENSMUSP00000004072	0.139	0	0	0	0.856	0.95	1	0.9	1	0.584	1	0.999
Pdhb	Pdhx	5017460	5016207	10090.ENSMUSP00000022268	10090.ENSMUSP00000011058	0.119	0.002	0.435	0	0.725	0.741	1	0.9	1	0.793	1	0.999
Rpl39	Rpl18	5033187	5031793	10090.ENSMUSP00000110886	10090.ENSMUSP00000103365	0.089	0	0	0	0.854	0.962	1	0.72	1	0.489	1	0.999
Rps28	Rps25	5033019	5027947	10090.ENSMUSP00000110013	10090.ENSMUSP00000079180	0	0	0	0	0.868	0.958	1	0.9	1	0.625	1	0.999
Rps20	Rpl30	5034139	5032315	10090.ENSMUSP00000120528	10090.ENSMUSP00000106014	0.171	0	0	0	0.931	0.971	1	0	0	0.779	1	0.999
Rps6	Rpl8	5031125	5015714	10090.ENSMUSP00000099878	10090.ENSMUSP00000004072	0	0	0	0	0.96	0.971	1	0.9	1	0.428	1	0.999
Rps20	Rps10	5034139	5033114	10090.ENSMUSP00000120528	10090.ENSMUSP00000110532	0	0	0	0	0.804	0.958	1	0.72	1	0.663	1	0.999
Psmd8	Psmc2	5023901	5019763	10090.ENSMUSP00000051657	10090.ENSMUSP00000030769	0	0	0	0	0.718	0.882	1	0.9	1	0.789	1	0.999
Rps28	Rpl30	5033019	5032315	10090.ENSMUSP00000110013	10090.ENSMUSP00000106014	0	0	0	0	0.835	0.958	1	0.9	1	0.627	1	0.999
Rpl32	Rpl37	5028158	5023036	10090.ENSMUSP00000080523	10090.ENSMUSP00000046506	0	0	0	0	0.861	0.971	1	0.9	1	0.445	1	0.999
Rps24	Rps26-ps1	5034648	5027499	10090.ENSMUSP00000125977	10090.ENSMUSP00000076447	0	0	0	0	0.775	0.958	1	0.72	1	0.877	1	0.999
Rps15a	Rpl18	5034103	5031793	10090.ENSMUSP00000119975	10090.ENSMUSP00000103365	0	0	0	0	0.903	0.97	1	0.9	1	0.593	1	0.999
Rps6	Rpl19	5031125	5016512	10090.ENSMUSP00000099878	10090.ENSMUSP00000017548	0	0	0	0	0.941	0.971	1	0.9	1	0.691	1	0.999
Uqcrh	Uqcrq	5027699	5024138	10090.ENSMUSP00000077744	10090.ENSMUSP00000053145	0	0	0	0	0.865	0.815	1	0.9	1	0.867	1	0.999
Rpl38	Rps21	5031605	5024953	10090.ENSMUSP00000102213	10090.ENSMUSP00000058432	0	0	0	0	0.954	0.889	1	0.9	1	0.694	1	0.999
Rpl30	Rps9	5032315	5015940	10090.ENSMUSP00000106014	10090.ENSMUSP00000006496	0	0	0	0	0.921	0.971	1	0.9	1	0.723	1	0.999
Rps5	Rpl13	5015759	5015324	10090.ENSMUSP00000004554	10090.ENSMUSP00000000756	0	0	0	0	0.947	0.8	1	0.9	1	0.452	1	0.999
Psma2	Psmb2	5035328	5019726	10090.ENSMUSP00000129767	10090.ENSMUSP00000030642	0	0	0.216	0	0.914	0.969	1	0.9	1	0.768	1	0.999
Stxbp1	Stx1a	5029101	5015843	10090.ENSMUSP00000089051	10090.ENSMUSP00000005509	0	0	0	0	0.138	0.9	1	0.9	1	0.915	1	0.999
Rpl22	Rps3	5034020	5020408	10090.ENSMUSP00000118787	10090.ENSMUSP00000032998	0	0	0	0	0.832	0.971	1	0.9	1	0.588	1	0.999
Rpl30	Rpl23	5032315	5030904	10090.ENSMUSP00000106014	10090.ENSMUSP00000099435	0	0	0	0	0.938	0.971	1	0.9	1	0.362	1	0.999
Rps25	Rpl26	5027947	5026969	10090.ENSMUSP00000079180	10090.ENSMUSP00000073175	0	0	0	0	0.964	0.971	1	0.9	1	0.806	1	0.999
Rps19	Rps27a	5031943	5031143	10090.ENSMUSP00000104067	10090.ENSMUSP00000099909	0	0	0	0	0.88	0.896	1	0.9	1	0.407	1	0.999
Rpl35a	Rps11	5033146	5015656	10090.ENSMUSP00000110731	10090.ENSMUSP00000003521	0	0	0	0	0.999	0.971	1	0.9	1	0.619	1	0.999
Rps27a	Rps17	5031143	5028013	10090.ENSMUSP00000099909	10090.ENSMUSP00000079628	0	0	0	0	0.952	0.896	1	0.72	1	0.498	1	0.999
Psma4	Psmb6	5020992	5016580	10090.ENSMUSP00000034848	10090.ENSMUSP00000018430	0	0	0	0	0.812	0.952	1	0.9	1	0.747	1	0.999
Rps15a	Rps29	5034103	5021660	10090.ENSMUSP00000119975	10090.ENSMUSP00000038352	0.17	0	0	0	0.832	0.971	1	0.72	1	0.652	1	0.999
Rps3a1	Rpl19	5019462	5016512	10090.ENSMUSP00000029722	10090.ENSMUSP00000017548	0	0	0.336	0	0.94	0.889	1	0.9	1	0.674	1	0.999
Rpl34	Rps5	5028844	5015759	10090.ENSMUSP00000086614	10090.ENSMUSP00000004554	0	0	0	0	0.924	0.801	1	0.9	1	0.444	1	0.999
Rpl14	Rpl23	5035620	5030904	10090.ENSMUSP00000131489	10090.ENSMUSP00000099435	0.153	0	0	0	0.916	0.869	1	0.9	1	0.185	1	0.999
Rps8	Rps11	5031065	5015656	10090.ENSMUSP00000099757	10090.ENSMUSP00000003521	0	0	0	0	0.995	0.971	1	0.9	1	0.793	1	0.999
Rpl26	Rps23	5026969	5024346	10090.ENSMUSP00000073175	10090.ENSMUSP00000054490	0.164	0	0	0	0.922	0.971	1	0.9	1	0.765	1	0.999
Rpl39	Rps23	5033187	5024346	10090.ENSMUSP00000110886	10090.ENSMUSP00000054490	0.044	0	0	0	0.861	0.971	1	0.72	1	0.481	1	0.999
Psmb3	Psmb10	5030905	5020832	10090.ENSMUSP00000099436	10090.ENSMUSP00000034369	0	0	0	0	0.652	0.944	1	0.9	1	0.552	1	0.999
Rps24	Rps17	5034648	5028013	10090.ENSMUSP00000125977	10090.ENSMUSP00000079628	0.13	0	0.2	0	0.909	0.97	1	0.72	1	0.936	1	0.999
Rpl4	Rpl6	5021039	5020043	10090.ENSMUSP00000034966	10090.ENSMUSP00000031617	0.088	0	0	0	0.871	0.791	1	0.9	1	0.715	1	0.999
Rps10	Rps8	5033114	5031065	10090.ENSMUSP00000110532	10090.ENSMUSP00000099757	0	0	0	0	0.893	0.958	1	0.72	1	0.705	1	0.999
Rpl14	Rps11	5035620	5015656	10090.ENSMUSP00000131489	10090.ENSMUSP00000003521	0.153	0	0	0	0.918	0.859	1	0.9	1	0.693	1	0.999
Rpl32	Rpl7	5028158	5026693	10090.ENSMUSP00000080523	10090.ENSMUSP00000071616	0.119	0	0	0	0.911	0.958	1	0.9	1	0.345	1	0.999
Rpl5	Rps5	5028222	5015759	10090.ENSMUSP00000080854	10090.ENSMUSP00000004554	0.172	0	0	0	0.999	0.861	1	0	0	0.788	1	0.999
Psmb10	Psmb4	5020832	5015885	10090.ENSMUSP00000034369	10090.ENSMUSP00000005923	0	0	0	0	0.754	0.959	1	0.9	1	0.665	1	0.999
Rps10	Rps29	5033114	5021660	10090.ENSMUSP00000110532	10090.ENSMUSP00000038352	0	0	0	0	0.792	0.958	1	0.72	1	0.725	1	0.999
Rpl22	Rpl18	5034020	5031793	10090.ENSMUSP00000118787	10090.ENSMUSP00000103365	0	0	0	0	0.843	0.856	1	0.9	1	0.713	1	0.999
Rps24	Rps15a	5034648	5034103	10090.ENSMUSP00000125977	10090.ENSMUSP00000119975	0	0	0	0	0.999	0.97	1	0.72	1	0.625	1	0.999
Rpl22	Rpl23	5034020	5030904	10090.ENSMUSP00000118787	10090.ENSMUSP00000099435	0	0	0	0	0.935	0.971	1	0.9	1	0.253	1	0.999
Rps10	Rps9	5033114	5015940	10090.ENSMUSP00000110532	10090.ENSMUSP00000006496	0	0	0	0	0.855	0.958	1	0.72	1	0.594	1	0.999
Psma2	Psmb1	5035328	5016329	10090.ENSMUSP00000129767	10090.ENSMUSP00000014913	0	0	0.254	0	0.925	0.96	1	0.9	1	0.817	1	0.999
Rpl6	Rps3a1	5020043	5019462	10090.ENSMUSP00000031617	10090.ENSMUSP00000029722	0	0	0	0	0.873	0.797	1	0.9	1	0.723	1	0.999
Rps17	Rpl26	5028013	5026969	10090.ENSMUSP00000079628	10090.ENSMUSP00000073175	0	0	0	0	0.962	0.971	1	0	0	0.877	1	0.999
Rps3	Rps5	5020408	5015759	10090.ENSMUSP00000032998	10090.ENSMUSP00000004554	0.172	0	0	0	0.999	0.972	1	0.9	1	0.761	1	0.999
Rpl19	Rps11	5016512	5015656	10090.ENSMUSP00000017548	10090.ENSMUSP00000003521	0.193	0	0	0	0.972	0.972	1	0.9	1	0.735	1	0.999
Rps15	Rps29	5026344	5021660	10090.ENSMUSP00000069004	10090.ENSMUSP00000038352	0.139	0	0	0	0.829	0.958	1	0.72	1	0.668	1	0.999
Rps13	Rpl10a	5034698	5023403	10090.ENSMUSP00000126294	10090.ENSMUSP00000048469	0.042	0	0	0	0.981	0.971	1	0.9	1	0.531	1	0.999
Psma1	Psma6	5020413	5017199	10090.ENSMUSP00000033008	10090.ENSMUSP00000021412	0	0	0.292	0.757	0.914	0.978	1	0.9	1	0.757	1	0.999
Rpl23	Rpl26	5030904	5026969	10090.ENSMUSP00000099435	10090.ENSMUSP00000073175	0.172	0	0.229	0	0.957	0.971	1	0.9	1	0.545	1	0.999
Rpl10a	Rps9	5023403	5015940	10090.ENSMUSP00000048469	10090.ENSMUSP00000006496	0.164	0	0	0	0.84	0.971	1	0.9	1	0.305	1	0.999
Rps19	Rps17	5031943	5028013	10090.ENSMUSP00000104067	10090.ENSMUSP00000079628	0	0	0	0	0.892	0.893	1	0.54	1	0.933	1	0.999
Rpl3	Rps21	5028126	5024953	10090.ENSMUSP00000080354	10090.ENSMUSP00000058432	0	0	0	0	0.912	0.811	1	0.9	1	0.499	1	0.999
Rpl32	Rps9	5028158	5015940	10090.ENSMUSP00000080523	10090.ENSMUSP00000006496	0	0	0	0	0.894	0.971	1	0.9	1	0.193	1	0.999
Rps28	Rplp2	5033019	5028293	10090.ENSMUSP00000110013	10090.ENSMUSP00000081474	0	0	0	0	0.929	0.799	1	0.9	1	0.607	1	0.999
Rpl14	Rpl18	5035620	5031793	10090.ENSMUSP00000131489	10090.ENSMUSP00000103365	0	0	0	0	0.901	0.825	1	0.9	1	0.662	1	0.999
Psmb7	Psmb5	5018980	5017622	10090.ENSMUSP00000028083	10090.ENSMUSP00000022803	0	0	0	0.678	0.728	0.959	1	0.9	1	0.894	1	0.999
Psmb9	Psma1	5035932	5020413	10090.ENSMUSP00000133499	10090.ENSMUSP00000033008	0	0	0	0	0.769	0.959	1	0.9	1	0.538	1	0.999
Rps13	Rpl5	5034698	5028222	10090.ENSMUSP00000126294	10090.ENSMUSP00000080854	0	0	0	0	0.999	0.851	1	0	0	0.812	1	0.999
Rpl37	Rps5	5023036	5015759	10090.ENSMUSP00000046506	10090.ENSMUSP00000004554	0	0	0	0	0.823	0.972	1	0.9	1	0.401	1	0.999
Rps25	Rpl37	5027947	5023036	10090.ENSMUSP00000079180	10090.ENSMUSP00000046506	0	0	0	0	0.85	0.972	1	0.9	1	0.6	1	0.999
Rpl23	Rps3	5030904	5020408	10090.ENSMUSP00000099435	10090.ENSMUSP00000032998	0.193	0	0	0	0.999	0.971	1	0.9	1	0.524	1	0.999
Rpl30	Rpl19	5032315	5016512	10090.ENSMUSP00000106014	10090.ENSMUSP00000017548	0	0	0	0	0.925	0.971	1	0.9	1	0.696	1	0.999
Rps20	Rps17	5034139	5028013	10090.ENSMUSP00000120528	10090.ENSMUSP00000079628	0	0	0	0	0.91	0.972	1	0.72	1	0.785	1	0.999
Rpl14	Rps21	5035620	5024953	10090.ENSMUSP00000131489	10090.ENSMUSP00000058432	0	0	0	0	0.882	0.818	1	0.9	1	0.622	1	0.999
Rpl32	Rps5	5028158	5015759	10090.ENSMUSP00000080523	10090.ENSMUSP00000004554	0	0	0	0	0.943	0.971	1	0.9	1	0.538	1	0.999
Rpl5	Rpl4	5028222	5021039	10090.ENSMUSP00000080854	10090.ENSMUSP00000034966	0.17	0	0	0	0.922	0.817	1	0.72	1	0.774	1	0.999
Rpl37a	Rps14	5025033	5018277	10090.ENSMUSP00000058919	10090.ENSMUSP00000025511	0	0	0.218	0	0.957	0.97	1	0.9	1	0.545	1	0.999
Rpl18	Rpl37	5031793	5023036	10090.ENSMUSP00000103365	10090.ENSMUSP00000046506	0	0	0	0	0.826	0.97	1	0.9	1	0.359	1	0.999
Rps15a	Rps17	5034103	5028013	10090.ENSMUSP00000119975	10090.ENSMUSP00000079628	0	0	0	0	0.887	0.972	1	0.72	1	0.46	1	0.999
Rpl3	Rps5	5028126	5015759	10090.ENSMUSP00000080354	10090.ENSMUSP00000004554	0.139	0	0	0	0.999	0.847	1	0.9	1	0.681	1	0.999
Rpl5	Rpl7	5028222	5026693	10090.ENSMUSP00000080854	10090.ENSMUSP00000071616	0.164	0	0	0	0.999	0.821	1	0.72	1	0.793	1	0.999
Uqcr10	Uqcrq	5024399	5024138	10090.ENSMUSP00000054856	10090.ENSMUSP00000053145	0	0	0	0	0.833	0.811	1	0.9	1	0.862	1	0.999
Rpl18	Rps23	5031793	5024346	10090.ENSMUSP00000103365	10090.ENSMUSP00000054490	0.172	0	0	0	0.924	0.97	1	0.9	1	0.312	1	0.999
Psmb9	Psmb4	5035932	5015885	10090.ENSMUSP00000133499	10090.ENSMUSP00000005923	0	0	0	0	0.773	0.959	1	0.9	1	0.755	1	0.999
Rpl19	Rpl8	5016512	5015714	10090.ENSMUSP00000017548	10090.ENSMUSP00000004072	0.172	0	0.326	0	0.982	0.972	1	0.9	1	0.541	1	0.999
Rps10	Rps17	5033114	5028013	10090.ENSMUSP00000110532	10090.ENSMUSP00000079628	0	0	0	0	0.861	0.958	1	0.72	1	0.888	1	0.999
Rpl18	Rps25	5031793	5027947	10090.ENSMUSP00000103365	10090.ENSMUSP00000079180	0	0	0	0	0.91	0.884	1	0.9	1	0.565	1	0.999
Rps13	Rps9	5034698	5015940	10090.ENSMUSP00000126294	10090.ENSMUSP00000006496	0.057	0	0	0	0.876	0.972	1	0.9	1	0.743	1	0.999
Psma2	Psma3	5035328	5034579	10090.ENSMUSP00000129767	10090.ENSMUSP00000125548	0	0	0.359	0.79	0.92	0.97	1	0.9	1	0.841	1	0.999
Rps15a	Rpl10a	5034103	5023403	10090.ENSMUSP00000119975	10090.ENSMUSP00000048469	0.172	0	0	0	0.999	0.971	1	0.9	1	0.649	1	0.999
Rps20	Rps28	5034139	5033019	10090.ENSMUSP00000120528	10090.ENSMUSP00000110013	0	0	0	0	0.909	0.958	1	0.72	1	0.594	1	0.999
Atp5o	Atp5j	5017883	5017869	10090.ENSMUSP00000023677	10090.ENSMUSP00000023608	0	0	0	0	0.922	0.805	1	0.9	1	0.702	1	0.999
Rps28	Rpl10a	5033019	5023403	10090.ENSMUSP00000110013	10090.ENSMUSP00000048469	0	0	0	0	0.858	0.958	1	0.9	1	0.563	1	0.999
Rpl26	Rps5	5026969	5015759	10090.ENSMUSP00000073175	10090.ENSMUSP00000004554	0.164	0	0	0	0.962	0.971	1	0.9	1	0.41	1	0.999
Rpl22	Rps8	5034020	5031065	10090.ENSMUSP00000118787	10090.ENSMUSP00000099757	0	0	0	0	0.896	0.971	1	0.9	1	0.686	1	0.999
Vps26a	Vps35	5029211	5020747	10090.ENSMUSP00000090130	10090.ENSMUSP00000034131	0	0	0	0	0.489	0.945	1	0.9	1	0.95	1	0.999
Rps17	Rps5	5028013	5015759	10090.ENSMUSP00000079628	10090.ENSMUSP00000004554	0	0	0	0	0.948	0.972	1	0.72	1	0.651	1	0.999
Rpl18	Rps6	5031793	5031125	10090.ENSMUSP00000103365	10090.ENSMUSP00000099878	0	0	0	0	0.934	0.854	1	0.9	1	0.651	1	0.999
Rpl38	Rps5	5031605	5015759	10090.ENSMUSP00000102213	10090.ENSMUSP00000004554	0	0	0	0	0.911	0.896	1	0.9	1	0.517	1	0.999
Rpl30	Rps14	5032315	5018277	10090.ENSMUSP00000106014	10090.ENSMUSP00000025511	0	0	0	0	0.913	0.97	1	0.9	1	0.815	1	0.999
Rps17	Rpsa	5028013	5021080	10090.ENSMUSP00000079628	10090.ENSMUSP00000035105	0	0	0	0	0.815	0.958	1	0.72	1	0.621	1	0.999
Rpl18	Rpl34	5031793	5028844	10090.ENSMUSP00000103365	10090.ENSMUSP00000086614	0	0	0	0	0.909	0.8	1	0.9	1	0.697	1	0.999
Rpl31	Rps28	5036727	5033019	10090.ENSMUSP00000137631	10090.ENSMUSP00000110013	0	0	0	0	0.825	0.958	1	0.72	1	0.635	1	0.999
Psma3	Psmb2	5034579	5019726	10090.ENSMUSP00000125548	10090.ENSMUSP00000030642	0	0	0	0	0.817	0.975	1	0.9	1	0.808	1	0.999
Rps20	Rps15	5034139	5026344	10090.ENSMUSP00000120528	10090.ENSMUSP00000069004	0.164	0	0	0	0.806	0.958	1	0.72	1	0.801	1	0.999
Psmb9	Psmb10	5035932	5020832	10090.ENSMUSP00000133499	10090.ENSMUSP00000034369	0	0	0	0.757	0.86	0.93	1	0.9	1	0.917	1	0.999
Rpl30	Rps3	5032315	5020408	10090.ENSMUSP00000106014	10090.ENSMUSP00000032998	0	0	0	0	0.989	0.971	1	0.9	1	0.569	1	0.999
Rps13	Rpl18	5034698	5031793	10090.ENSMUSP00000126294	10090.ENSMUSP00000103365	0	0	0	0	0.872	0.883	1	0.9	1	0.592	1	0.999
Rps6	Rps23	5031125	5024346	10090.ENSMUSP00000099878	10090.ENSMUSP00000054490	0	0	0	0	0.999	0.971	1	0.9	1	0.74	1	0.999
Rps8	Rpl26	5031065	5026969	10090.ENSMUSP00000099757	10090.ENSMUSP00000073175	0	0	0	0	0.97	0.97	1	0.9	1	0.802	1	0.999
Psmb9	Psmb1	5035932	5016329	10090.ENSMUSP00000133499	10090.ENSMUSP00000014913	0	0	0	0	0.776	0.957	1	0.9	1	0.563	1	0.999
Atp5k	Atp5j	5023828	5017869	10090.ENSMUSP00000051222	10090.ENSMUSP00000023608	0	0	0	0	0.915	0.795	1	0.9	1	0.588	1	0.999
Psma3	Psmc2	5034579	5019763	10090.ENSMUSP00000125548	10090.ENSMUSP00000030769	0	0	0	0	0.818	0.883	1	0.9	1	0.677	1	0.999
Rps26-ps1	Rps3	5027499	5020408	10090.ENSMUSP00000076447	10090.ENSMUSP00000032998	0	0	0	0	0.778	0.958	1	0.72	1	0.675	1	0.999
Rpl35a	Rps17	5033146	5028013	10090.ENSMUSP00000110731	10090.ENSMUSP00000079628	0	0	0	0	0.91	0.971	1	0	0	0.931	1	0.999
Psma7	Psmb7	5019262	5018980	10090.ENSMUSP00000029082	10090.ENSMUSP00000028083	0	0	0.204	0	0.734	0.951	1	0.9	1	0.732	1	0.999
Rps23	Rpl19	5024346	5016512	10090.ENSMUSP00000054490	10090.ENSMUSP00000017548	0	0	0.219	0	0.942	0.971	1	0.9	1	0.714	1	0.999
Rps8	Rpl36	5031065	5027972	10090.ENSMUSP00000099757	10090.ENSMUSP00000079340	0	0	0	0	0.898	0.95	1	0.9	1	0.52	1	0.999
Rps16	Rps3a1	5031918	5019462	10090.ENSMUSP00000103940	10090.ENSMUSP00000029722	0	0	0	0	0.941	0.971	1	0.72	1	0.443	1	0.999
Rps15a	Rps6	5034103	5031125	10090.ENSMUSP00000119975	10090.ENSMUSP00000099878	0	0	0	0	0.924	0.971	1	0.9	1	0.423	1	0.999
Psmb3	Psma4	5030905	5020992	10090.ENSMUSP00000099436	10090.ENSMUSP00000034848	0	0	0	0	0.811	0.945	1	0.9	1	0.704	1	0.999
Psma3	Psma6	5034579	5017199	10090.ENSMUSP00000125548	10090.ENSMUSP00000021412	0	0	0.357	0.789	0.934	0.967	1	0.9	1	0.824	1	0.999
Rps19	Rps25	5031943	5027947	10090.ENSMUSP00000104067	10090.ENSMUSP00000079180	0	0	0	0	0.999	0.896	1	0.9	1	0.742	1	0.999
Rpl18	Rpl7	5031793	5026693	10090.ENSMUSP00000103365	10090.ENSMUSP00000071616	0	0	0	0	0.91	0.961	1	0.72	1	0.673	1	0.999
Rpl35a	Rps21	5033146	5024953	10090.ENSMUSP00000110731	10090.ENSMUSP00000058432	0	0	0	0	0.942	0.896	1	0.9	1	0.408	1	0.999
Rps27a	Rpl8	5031143	5015714	10090.ENSMUSP00000099909	10090.ENSMUSP00000004072	0	0	0	0	0.941	0.896	1	0.9	1	0.276	1	0.999
Psma4	Psma7	5020992	5019262	10090.ENSMUSP00000034848	10090.ENSMUSP00000029082	0	0	0.341	0.865	0.877	0.953	1	0.9	1	0.838	1	0.999
Rps13	Rpl26	5034698	5026969	10090.ENSMUSP00000126294	10090.ENSMUSP00000073175	0	0	0.3	0	0.907	0.971	1	0.9	1	0.541	1	0.999
Uqcrq	Uqcrc2	5024138	5020466	10090.ENSMUSP00000053145	10090.ENSMUSP00000033176	0	0	0	0	0.711	0.848	1	0.9	1	0.809	1	0.999
Psmb5	Psma6	5017622	5017199	10090.ENSMUSP00000022803	10090.ENSMUSP00000021412	0	0	0	0	0.688	0.961	1	0.9	1	0.637	1	0.999
Rps17	Rpl8	5028013	5015714	10090.ENSMUSP00000079628	10090.ENSMUSP00000004072	0.171	0	0	0	0.948	0.972	1	0	0	0.354	1	0.999
Uqcrq	Cyc1	5024138	5017751	10090.ENSMUSP00000053145	10090.ENSMUSP00000023210	0	0	0	0	0.8	0.904	1	0.9	1	0.788	1	0.999
Rpl38	Rpl34	5031605	5028844	10090.ENSMUSP00000102213	10090.ENSMUSP00000086614	0	0	0	0	0.926	0.801	1	0.9	1	0.516	1	0.999
Uqcr10	Uqcrfs1	5024399	5022838	10090.ENSMUSP00000054856	10090.ENSMUSP00000045284	0	0	0	0	0.808	0.812	1	0.9	1	0.811	1	0.999
Rpl7	Rpl8	5026693	5015714	10090.ENSMUSP00000071616	10090.ENSMUSP00000004072	0.119	0	0	0	0.999	0.962	1	0.72	1	0.635	1	0.999
Rps13	Rps21	5034698	5024953	10090.ENSMUSP00000126294	10090.ENSMUSP00000058432	0	0	0	0	0.906	0.895	1	0.9	1	0.436	1	0.999
Rps25	Rps29	5027947	5021660	10090.ENSMUSP00000079180	10090.ENSMUSP00000038352	0	0	0	0	0.865	0.97	1	0.72	1	0.733	1	0.999
Rps13	Rps15	5034698	5026344	10090.ENSMUSP00000126294	10090.ENSMUSP00000069004	0	0	0	0	0.801	0.958	1	0.72	1	0.727	1	0.999
Rps24	Rpl3	5034648	5028126	10090.ENSMUSP00000125977	10090.ENSMUSP00000080354	0	0	0	0	0.999	0.793	1	0	0	0.677	1	0.999
Uqcrq	Uqcrfs1	5024138	5022838	10090.ENSMUSP00000053145	10090.ENSMUSP00000045284	0	0	0	0	0.801	0.82	1	0.9	1	0.813	1	0.999
Rps19	Rps9	5031943	5015940	10090.ENSMUSP00000104067	10090.ENSMUSP00000006496	0	0	0.27	0	0.941	0.896	1	0.9	1	0.661	1	0.999
Rpl31	Rps24	5036727	5034648	10090.ENSMUSP00000137631	10090.ENSMUSP00000125977	0	0	0	0	0.939	0.97	1	0	0	0.828	1	0.999
Rpl23	Rps21	5030904	5024953	10090.ENSMUSP00000099435	10090.ENSMUSP00000058432	0	0	0	0	0.954	0.896	1	0.9	1	0.14	1	0.999
Rps3a1	Rps18	5019462	5016094	10090.ENSMUSP00000029722	10090.ENSMUSP00000008812	0	0	0	0	0.819	0.95	1	0.9	1	0.36	1	0.999
Rpl38	Rps3	5031605	5020408	10090.ENSMUSP00000102213	10090.ENSMUSP00000032998	0	0	0	0	0.883	0.896	1	0.9	1	0.578	1	0.999
Psma5	Psmb4	5028998	5015885	10090.ENSMUSP00000088057	10090.ENSMUSP00000005923	0	0	0	0	0.835	0.948	1	0.9	1	0.725	1	0.999
Uqcrh	Uqcr10	5027699	5024399	10090.ENSMUSP00000077744	10090.ENSMUSP00000054856	0	0	0	0	0.814	0.799	1	0.9	1	0.875	1	0.999
Rpl30	Rpl26	5032315	5026969	10090.ENSMUSP00000106014	10090.ENSMUSP00000073175	0	0	0.24	0	0.938	0.971	1	0.9	1	0.787	1	0.999
Rps24	Rps19	5034648	5031943	10090.ENSMUSP00000125977	10090.ENSMUSP00000104067	0	0	0	0	0.999	0.889	1	0.54	1	0.939	1	0.999
Rps6	Rpl37a	5031125	5025033	10090.ENSMUSP00000099878	10090.ENSMUSP00000058919	0	0	0	0	0.857	0.97	1	0.9	1	0.498	1	0.999
Rps13	Rpl8	5034698	5015714	10090.ENSMUSP00000126294	10090.ENSMUSP00000004072	0	0	0.201	0	0.914	0.972	1	0.9	1	0.697	1	0.999
Rps19	Rpl5	5031943	5028222	10090.ENSMUSP00000104067	10090.ENSMUSP00000080854	0	0	0	0	0.999	0.86	1	0	0	0.933	1	0.999
Rps15a	Rpl35a	5034103	5033146	10090.ENSMUSP00000119975	10090.ENSMUSP00000110731	0	0	0	0	0.937	0.971	1	0.9	1	0.508	1	0.999
Psmb3	Psmb4	5030905	5015885	10090.ENSMUSP00000099436	10090.ENSMUSP00000005923	0	0	0	0	0.862	0.944	1	0.9	1	0.817	1	0.999
Psma6	Psmb1	5017199	5016329	10090.ENSMUSP00000021412	10090.ENSMUSP00000014913	0	0	0	0	0.835	0.96	1	0.9	1	0.713	1	0.999
Psma3	Psmb6	5034579	5016580	10090.ENSMUSP00000125548	10090.ENSMUSP00000018430	0	0	0	0	0.807	0.97	1	0.9	1	0.651	1	0.999
Rps6	Rps15	5031125	5026344	10090.ENSMUSP00000099878	10090.ENSMUSP00000069004	0	0	0	0	0.828	0.958	1	0.72	1	0.608	1	0.999
Rpl39	Rpl30	5033187	5032315	10090.ENSMUSP00000110886	10090.ENSMUSP00000106014	0	0	0	0	0.934	0.971	1	0.72	1	0.613	1	0.999
Rpl22	Rps25	5034020	5027947	10090.ENSMUSP00000118787	10090.ENSMUSP00000079180	0	0	0	0	0.884	0.971	1	0.9	1	0.639	1	0.999
Rps15a	Rps8	5034103	5031065	10090.ENSMUSP00000119975	10090.ENSMUSP00000099757	0	0	0	0	0.925	0.971	1	0.9	1	0.607	1	0.999
Rpl6	Rpl19	5020043	5016512	10090.ENSMUSP00000031617	10090.ENSMUSP00000017548	0.145	0	0	0	0.928	0.795	1	0.9	1	0.757	1	0.999
Rps13	Rps3	5034698	5020408	10090.ENSMUSP00000126294	10090.ENSMUSP00000032998	0	0	0	0	0.915	0.972	1	0.9	1	0.721	1	0.999
Rpl34	Rpl26	5028844	5026969	10090.ENSMUSP00000086614	10090.ENSMUSP00000073175	0.164	0	0	0	0.943	0.801	1	0.9	1	0.547	1	0.999
Rpl18	Rps21	5031793	5024953	10090.ENSMUSP00000103365	10090.ENSMUSP00000058432	0	0	0	0	0.912	0.864	1	0.9	1	0.483	1	0.999
Rpl39	Rpl26	5033187	5026969	10090.ENSMUSP00000110886	10090.ENSMUSP00000073175	0.043	0	0	0	0.936	0.97	1	0.72	1	0.68	1	0.999
Psmb10	Psma1	5020832	5020413	10090.ENSMUSP00000034369	10090.ENSMUSP00000033008	0	0	0	0	0.769	0.959	1	0.9	1	0.608	1	0.999
Psmb5	Psmb4	5017622	5015885	10090.ENSMUSP00000022803	10090.ENSMUSP00000005923	0	0	0	0	0.811	0.96	1	0.9	1	0.777	1	0.999
Rps3	Rpl19	5020408	5016512	10090.ENSMUSP00000032998	10090.ENSMUSP00000017548	0.193	0	0.276	0	0.99	0.972	1	0.9	1	0.598	1	0.999
Rpl31	Rps25	5036727	5027947	10090.ENSMUSP00000137631	10090.ENSMUSP00000079180	0	0	0	0	0.916	0.971	1	0	0	0.801	1	0.999
Rps8	Rps5	5031065	5015759	10090.ENSMUSP00000099757	10090.ENSMUSP00000004554	0	0	0	0	0.957	0.971	1	0.9	1	0.709	1	0.999
Rps25	Rps9	5027947	5015940	10090.ENSMUSP00000079180	10090.ENSMUSP00000006496	0	0	0	0	0.883	0.971	1	0.9	1	0.543	1	0.999
Rpl7	Rps3a1	5026693	5019462	10090.ENSMUSP00000071616	10090.ENSMUSP00000029722	0	0	0	0	0.999	0.843	1	0	0	0.701	1	0.999
Rps13	Rpl4	5034698	5021039	10090.ENSMUSP00000126294	10090.ENSMUSP00000034966	0	0	0	0	0.9	0.821	1	0.9	1	0.719	1	0.999
Rpl8	Rpl13	5015714	5015324	10090.ENSMUSP00000004072	10090.ENSMUSP00000000756	0	0	0	0	0.939	0.801	1	0.9	1	0.687	1	0.999
Rpl31	Rps23	5036727	5024346	10090.ENSMUSP00000137631	10090.ENSMUSP00000054490	0	0	0	0	0.881	0.97	1	0.72	1	0.427	1	0.999
Rpl30	Rps19	5032315	5031943	10090.ENSMUSP00000106014	10090.ENSMUSP00000104067	0	0	0	0	0.923	0.896	1	0.9	1	0.505	1	0.999
Rps13	Rpl19	5034698	5016512	10090.ENSMUSP00000126294	10090.ENSMUSP00000017548	0	0	0.205	0	0.915	0.972	1	0.9	1	0.41	1	0.999
Rpl38	Rps14	5031605	5018277	10090.ENSMUSP00000102213	10090.ENSMUSP00000025511	0	0	0	0	0.92	0.889	1	0.9	1	0.796	1	0.999
Rpl30	Rpl38	5032315	5031605	10090.ENSMUSP00000106014	10090.ENSMUSP00000102213	0	0	0	0	0.909	0.896	1	0.9	1	0.75	1	0.999
Dld	Dlat	5032391	5020906	10090.ENSMUSP00000106481	10090.ENSMUSP00000034567	0.077	0.5	0.37	0	0.595	0.752	1	0.9	1	0.85	1	0.999
Rpl14	Rpl37	5035620	5023036	10090.ENSMUSP00000131489	10090.ENSMUSP00000046506	0.044	0	0	0	0.829	0.889	1	0.9	1	0.619	1	0.999
Rpl22	Rps21	5034020	5024953	10090.ENSMUSP00000118787	10090.ENSMUSP00000058432	0	0	0	0	0.927	0.896	1	0.9	1	0.367	1	0.999
Dld	Pdhb	5032391	5017460	10090.ENSMUSP00000106481	10090.ENSMUSP00000022268	0.107	0	0.239	0	0.836	0.71	1	0.9	1	0.803	1	0.999
Rps6	Rpl4	5031125	5021039	10090.ENSMUSP00000099878	10090.ENSMUSP00000034966	0	0	0	0	0.923	0.823	1	0.9	1	0.668	1	0.999
Rps17	Rps15	5028013	5026344	10090.ENSMUSP00000079628	10090.ENSMUSP00000069004	0	0	0	0	0.865	0.958	1	0.72	1	0.79	1	0.999
Rps20	Rps5	5034139	5015759	10090.ENSMUSP00000120528	10090.ENSMUSP00000004554	0.164	0	0	0	0.904	0.972	1	0.72	1	0.681	1	0.999
Rpl31	Rpl38	5036727	5031605	10090.ENSMUSP00000137631	10090.ENSMUSP00000102213	0	0	0	0	0.886	0.896	1	0.72	1	0.748	1	0.999
Rps10	Rps6	5033114	5031125	10090.ENSMUSP00000110532	10090.ENSMUSP00000099878	0	0	0	0	0.798	0.958	1	0.72	1	0.684	1	0.999
Psmb7	Psma6	5018980	5017199	10090.ENSMUSP00000028083	10090.ENSMUSP00000021412	0	0	0.245	0	0.802	0.96	1	0.9	1	0.651	1	0.999
Rps19	Rpl23	5031943	5030904	10090.ENSMUSP00000104067	10090.ENSMUSP00000099435	0	0	0	0	0.999	0.896	1	0.9	1	0.515	1	0.999
Rplp2	Rps14	5028293	5018277	10090.ENSMUSP00000081474	10090.ENSMUSP00000025511	0	0	0	0	0.906	0.856	1	0.9	1	0.689	1	0.999
Psma4	Psmc2	5020992	5019763	10090.ENSMUSP00000034848	10090.ENSMUSP00000030769	0	0	0	0	0.869	0.895	1	0.9	1	0.769	1	0.999
Cox7c	Cox5a	5033801	5015244	10090.ENSMUSP00000115419	10090.ENSMUSP00000000090	0	0	0	0	0.828	0.727	1	0.9	1	0.816	1	0.999
Rpl31	Rpl19	5036727	5016512	10090.ENSMUSP00000137631	10090.ENSMUSP00000017548	0	0	0	0	0.891	0.97	1	0.72	1	0.785	1	0.999
Uqcrfs1	Uqcrc2	5022838	5020466	10090.ENSMUSP00000045284	10090.ENSMUSP00000033176	0	0	0	0	0.862	0.808	1	0.9	1	0.81	1	0.999
Cox7c	Cox6c	5033801	5016303	10090.ENSMUSP00000115419	10090.ENSMUSP00000014457	0	0	0	0	0.902	0.714	1	0.9	1	0.868	1	0.999
Rpl34	Rps21	5028844	5024953	10090.ENSMUSP00000086614	10090.ENSMUSP00000058432	0	0	0	0	0.948	0.801	1	0.9	1	0.372	1	0.999
Rps24	Rps26	5034648	5018537	10090.ENSMUSP00000125977	10090.ENSMUSP00000026420	0	0	0	0	0.861	0.958	1	0.72	1	0.877	1	0.999
Psma2	Psma5	5035328	5028998	10090.ENSMUSP00000129767	10090.ENSMUSP00000088057	0	0	0.417	0.838	0.871	0.958	1	0.9	1	0.803	1	0.999
Rpl22	Rpl35a	5034020	5033146	10090.ENSMUSP00000118787	10090.ENSMUSP00000110731	0	0	0	0	0.914	0.971	1	0.9	1	0.502	1	0.999
Rps8	Rpl32	5031065	5028158	10090.ENSMUSP00000099757	10090.ENSMUSP00000080523	0	0	0	0	0.937	0.971	1	0.9	1	0.384	1	0.999
Rps8	Rpl3	5031065	5028126	10090.ENSMUSP00000099757	10090.ENSMUSP00000080354	0	0	0	0	0.999	0.856	1	0.9	1	0.799	1	0.999
Rps24	Rpl10a	5034648	5023403	10090.ENSMUSP00000125977	10090.ENSMUSP00000048469	0	0	0	0	0.999	0.968	1	0	0	0.534	1	0.999
Psma2	Psma7	5035328	5019262	10090.ENSMUSP00000129767	10090.ENSMUSP00000029082	0	0	0.417	0.882	0.889	0.953	1	0.9	1	0.778	1	0.999
Rpl22	Rpl36	5034020	5027972	10090.ENSMUSP00000118787	10090.ENSMUSP00000079340	0	0	0	0	0.736	0.95	1	0.9	1	0.323	1	0.999
Rpl26	Rps18	5026969	5016094	10090.ENSMUSP00000073175	10090.ENSMUSP00000008812	0.139	0	0	0	0.833	0.95	1	0.9	1	0.412	1	0.999
Rpl31	Rpl7	5036727	5026693	10090.ENSMUSP00000137631	10090.ENSMUSP00000071616	0	0	0	0	0.923	0.96	1	0.72	1	0.636	1	0.999
Rpl7	Rpl19	5026693	5016512	10090.ENSMUSP00000071616	10090.ENSMUSP00000017548	0.164	0	0	0	0.942	0.957	1	0.9	1	0.747	1	0.999
Rps14	Rps18	5018277	5016094	10090.ENSMUSP00000025511	10090.ENSMUSP00000008812	0.139	0	0	0	0.828	0.95	1	0.9	1	0.61	1	0.999
Rpl35a	Rps18	5033146	5016094	10090.ENSMUSP00000110731	10090.ENSMUSP00000008812	0	0	0	0	0.811	0.95	1	0.9	1	0.238	1	0.999
Rps20	Rpl26	5034139	5026969	10090.ENSMUSP00000120528	10090.ENSMUSP00000073175	0.164	0	0	0	0.899	0.971	1	0	0	0.794	1	0.999
Rpl22	Rpl5	5034020	5028222	10090.ENSMUSP00000118787	10090.ENSMUSP00000080854	0	0	0	0	0.876	0.852	1	0.72	1	0.861	1	0.999
Rps16	Rpl26	5031918	5026969	10090.ENSMUSP00000103940	10090.ENSMUSP00000073175	0.139	0	0	0	0.934	0.971	1	0	0	0.649	1	0.999
Psma3	Psma5	5034579	5028998	10090.ENSMUSP00000125548	10090.ENSMUSP00000088057	0	0	0.417	0.819	0.818	0.969	1	0.9	1	0.82	1	0.999
Rpl35a	Rps8	5033146	5031065	10090.ENSMUSP00000110731	10090.ENSMUSP00000099757	0	0	0	0	0.999	0.971	1	0.9	1	0.491	1	0.999
Psma5	Psmb6	5028998	5016580	10090.ENSMUSP00000088057	10090.ENSMUSP00000018430	0	0	0.21	0	0.799	0.948	1	0.9	1	0.629	1	0.999
Psmb2	Psmb6	5019726	5016580	10090.ENSMUSP00000030642	10090.ENSMUSP00000018430	0	0	0	0	0.878	0.96	1	0.9	1	0.716	1	0.999
Rps28	Rps17	5033019	5028013	10090.ENSMUSP00000110013	10090.ENSMUSP00000079628	0	0	0	0	0.93	0.958	1	0.72	1	0.648	1	0.999
Rplp2	Rpl8	5028293	5015714	10090.ENSMUSP00000081474	10090.ENSMUSP00000004072	0	0	0	0	0.918	0.883	1	0.9	1	0.261	1	0.999
Rps16	Rps29	5031918	5021660	10090.ENSMUSP00000103940	10090.ENSMUSP00000038352	0.113	0	0	0	0.862	0.971	1	0.72	1	0.563	1	0.999
Rpl37a	Rps18	5025033	5016094	10090.ENSMUSP00000058919	10090.ENSMUSP00000008812	0	0	0	0	0.852	0.95	1	0.9	1	0.325	1	0.999
Psma5	Psmc2	5028998	5019763	10090.ENSMUSP00000088057	10090.ENSMUSP00000030769	0	0	0	0	0.802	0.958	1	0.9	1	0.436	1	0.999
Rps10	Rps3	5033114	5020408	10090.ENSMUSP00000110532	10090.ENSMUSP00000032998	0	0	0	0	0.823	0.958	1	0.72	1	0.62	1	0.999
Rpl26	Rpl37a	5026969	5025033	10090.ENSMUSP00000073175	10090.ENSMUSP00000058919	0	0	0.288	0	0.978	0.97	1	0.9	1	0.506	1	0.999
Rps16	Rps8	5031918	5031065	10090.ENSMUSP00000103940	10090.ENSMUSP00000099757	0	0	0	0	0.999	0.971	1	0.72	1	0.826	1	0.999
Psma5	Psma1	5028998	5020413	10090.ENSMUSP00000088057	10090.ENSMUSP00000033008	0	0	0.348	0.807	0.815	0.969	1	0.9	1	0.82	1	0.999
Rpl30	Rps25	5032315	5027947	10090.ENSMUSP00000106014	10090.ENSMUSP00000079180	0	0	0	0	0.933	0.971	1	0.9	1	0.675	1	0.999
Rps21	Rps14	5024953	5018277	10090.ENSMUSP00000058432	10090.ENSMUSP00000025511	0	0	0	0	0.958	0.889	1	0.9	1	0.686	1	0.999
Rpl36	Rps23	5027972	5024346	10090.ENSMUSP00000079340	10090.ENSMUSP00000054490	0	0	0	0	0.861	0.95	1	0.9	1	0.425	1	0.999
Rpl3	Rpl4	5028126	5021039	10090.ENSMUSP00000080354	10090.ENSMUSP00000034966	0.113	0	0	0	0.986	0.831	1	0.9	1	0.699	1	0.999
Rpl14	Rpl19	5035620	5016512	10090.ENSMUSP00000131489	10090.ENSMUSP00000017548	0.145	0	0	0	0.881	0.817	1	0.9	1	0.559	1	0.999
Rps8	Rpl10a	5031065	5023403	10090.ENSMUSP00000099757	10090.ENSMUSP00000048469	0	0	0	0	0.981	0.971	1	0.9	1	0.457	1	0.999
Rpl31	Rpl30	5036727	5032315	10090.ENSMUSP00000137631	10090.ENSMUSP00000106014	0	0	0	0	0.927	0.97	1	0.72	1	0.701	1	0.999
Rpl31	Rps29	5036727	5021660	10090.ENSMUSP00000137631	10090.ENSMUSP00000038352	0	0	0	0	0.817	0.962	1	0.72	1	0.744	1	0.999
Rpl22	Rpl30	5034020	5032315	10090.ENSMUSP00000118787	10090.ENSMUSP00000106014	0	0	0	0	0.922	0.971	1	0.9	1	0.775	1	0.999
Rps24	Rps28	5034648	5033019	10090.ENSMUSP00000125977	10090.ENSMUSP00000110013	0.044	0	0	0	0.825	0.958	1	0.72	1	0.782	1	0.999
Rpl26	Rps21	5026969	5024953	10090.ENSMUSP00000073175	10090.ENSMUSP00000058432	0	0	0	0	0.971	0.89	1	0.9	1	0.376	1	0.999
Rps19	Rplp2	5031943	5028293	10090.ENSMUSP00000104067	10090.ENSMUSP00000081474	0.152	0	0	0	0.937	0.859	1	0.9	1	0.74	1	0.999
Rps17	Rps3a1	5028013	5019462	10090.ENSMUSP00000079628	10090.ENSMUSP00000029722	0	0	0	0	0.909	0.971	1	0.72	1	0.491	1	0.999
Rpl7	Rpl37a	5026693	5025033	10090.ENSMUSP00000071616	10090.ENSMUSP00000058919	0	0	0	0	0.88	0.961	1	0.72	1	0.564	1	0.999
Rps23	Rps26	5024346	5018537	10090.ENSMUSP00000054490	10090.ENSMUSP00000026420	0	0	0	0	0.861	0.958	1	0.72	1	0.625	1	0.999
Rps28	Rps23	5033019	5024346	10090.ENSMUSP00000110013	10090.ENSMUSP00000054490	0	0	0	0	0.912	0.958	1	0.9	1	0.695	1	0.999
Psma5	Psmb1	5028998	5016329	10090.ENSMUSP00000088057	10090.ENSMUSP00000014913	0	0	0.313	0	0.806	0.945	1	0.9	1	0.713	1	0.999
Rpl3	Rps9	5028126	5015940	10090.ENSMUSP00000080354	10090.ENSMUSP00000006496	0.139	0	0	0	0.922	0.851	1	0.9	1	0.611	1	0.999
Rps3	Rpl6	5020408	5020043	10090.ENSMUSP00000032998	10090.ENSMUSP00000031617	0.153	0	0	0	0.872	0.752	1	0.9	1	0.791	1	0.999
Rps9	Rps11	5015940	5015656	10090.ENSMUSP00000006496	10090.ENSMUSP00000003521	0.172	0	0	0	0.886	0.972	1	0.9	1	0.651	1	0.999
Psma2	Psmb3	5035328	5030905	10090.ENSMUSP00000129767	10090.ENSMUSP00000099436	0	0	0	0	0.854	0.945	1	0.9	1	0.691	1	0.999
Rps15a	Rps23	5034103	5024346	10090.ENSMUSP00000119975	10090.ENSMUSP00000054490	0.172	0	0	0	0.931	0.972	1	0.9	1	0.778	1	0.999
Rps9	Rpl8	5015940	5015714	10090.ENSMUSP00000006496	10090.ENSMUSP00000004072	0.164	0	0	0	0.911	0.972	1	0.9	1	0.588	1	0.999
Rpl5	Rpl8	5028222	5015714	10090.ENSMUSP00000080854	10090.ENSMUSP00000004072	0.172	0	0	0	0.999	0.863	1	0.72	1	0.718	1	0.999
Rps16	Rps26	5031918	5018537	10090.ENSMUSP00000103940	10090.ENSMUSP00000026420	0	0	0	0	0.862	0.958	1	0.72	1	0.51	1	0.999
Rps10	Rpl26	5033114	5026969	10090.ENSMUSP00000110532	10090.ENSMUSP00000073175	0	0	0	0	0.93	0.958	1	0	0	0.846	1	0.999
Rps25	Rps3	5027947	5020408	10090.ENSMUSP00000079180	10090.ENSMUSP00000032998	0	0	0	0	0.951	0.971	1	0.9	1	0.735	1	0.999
Rpl26	Rps15	5026969	5026344	10090.ENSMUSP00000073175	10090.ENSMUSP00000069004	0.164	0	0	0	0.906	0.958	1	0	0	0.768	1	0.999
Psmb3	Psmb1	5030905	5016329	10090.ENSMUSP00000099436	10090.ENSMUSP00000014913	0	0	0.215	0.743	0.824	0.944	1	0.9	1	0.609	1	0.999
Psma3	Psmb3	5034579	5030905	10090.ENSMUSP00000125548	10090.ENSMUSP00000099436	0	0	0	0	0.782	0.944	1	0.9	1	0.667	1	0.999
Rps28	Rps3a1	5033019	5019462	10090.ENSMUSP00000110013	10090.ENSMUSP00000029722	0	0	0	0	0.846	0.958	1	0.9	1	0.595	1	0.999
Uqcrfs1	Cyc1	5022838	5017751	10090.ENSMUSP00000045284	10090.ENSMUSP00000023210	0.193	0.13	0.259	0	0.836	0.907	1	0.9	1	0.843	1	0.999
Rpl31	Rpl35a	5036727	5033146	10090.ENSMUSP00000137631	10090.ENSMUSP00000110731	0	0	0	0	0.935	0.97	1	0.72	1	0.806	1	0.999
Rpl14	Rpl8	5035620	5015714	10090.ENSMUSP00000131489	10090.ENSMUSP00000004072	0.107	0	0	0	0.892	0.859	1	0.9	1	0.732	1	0.999
Psma5	Psmb2	5028998	5019726	10090.ENSMUSP00000088057	10090.ENSMUSP00000030642	0	0	0	0	0.794	0.956	1	0.9	1	0.763	1	0.999
Rps15a	Rps21	5034103	5024953	10090.ENSMUSP00000119975	10090.ENSMUSP00000058432	0	0	0	0	0.934	0.896	1	0.9	1	0.387	1	0.999
Rps10	Rps16	5033114	5031918	10090.ENSMUSP00000110532	10090.ENSMUSP00000103940	0	0	0	0	0.811	0.958	1	0.72	1	0.696	1	0.999
Rps13	Rpl3	5034698	5028126	10090.ENSMUSP00000126294	10090.ENSMUSP00000080354	0	0	0	0	0.999	0.857	1	0.9	1	0.45	1	0.999
Rps27a	Rps23	5031143	5024346	10090.ENSMUSP00000099909	10090.ENSMUSP00000054490	0	0	0	0	0.912	0.896	1	0.9	1	0.136	1	0.999
Rps19	Rps14	5031943	5018277	10090.ENSMUSP00000104067	10090.ENSMUSP00000025511	0	0	0	0	0.929	0.889	1	0.9	1	0.934	1	0.999
Rpl5	Rpl10a	5028222	5023403	10090.ENSMUSP00000080854	10090.ENSMUSP00000048469	0.172	0	0	0	0.999	0.836	1	0.72	1	0.649	1	0.999
Rps14	Rpl8	5018277	5015714	10090.ENSMUSP00000025511	10090.ENSMUSP00000004072	0.164	0	0.392	0	0.999	0.971	1	0.9	1	0.718	1	0.999
Rps16	Rps18	5031918	5016094	10090.ENSMUSP00000103940	10090.ENSMUSP00000008812	0.113	0	0	0	0.828	0.95	1	0.72	1	0.621	1	0.999
Rps6	Rpl23	5031125	5030904	10090.ENSMUSP00000099878	10090.ENSMUSP00000099435	0	0	0	0	0.999	0.971	1	0.9	1	0.226	1	0.999
Rpl38	Rps3a1	5031605	5019462	10090.ENSMUSP00000102213	10090.ENSMUSP00000029722	0	0	0	0	0.897	0.896	1	0.9	1	0.69	1	0.999
Rps13	Rps27a	5034698	5031143	10090.ENSMUSP00000126294	10090.ENSMUSP00000099909	0	0	0	0	0.875	0.896	1	0.9	1	0.384	1	0.999
Psmb10	Psmb2	5020832	5019726	10090.ENSMUSP00000034369	10090.ENSMUSP00000030642	0	0	0	0	0.76	0.943	1	0.9	1	0.715	1	0.999
Rpl18	Rpl32	5031793	5028158	10090.ENSMUSP00000103365	10090.ENSMUSP00000080523	0	0	0	0	0.91	0.969	1	0.9	1	0.608	1	0.999
Rps29	Rps9	5021660	5015940	10090.ENSMUSP00000038352	10090.ENSMUSP00000006496	0.139	0	0	0	0.816	0.971	1	0.72	1	0.523	1	0.999
Rpl14	Rps6	5035620	5031125	10090.ENSMUSP00000131489	10090.ENSMUSP00000099878	0	0	0	0	0.879	0.82	1	0.9	1	0.627	1	0.999
Psmb2	Psmb1	5019726	5016329	10090.ENSMUSP00000030642	10090.ENSMUSP00000014913	0	0	0	0.671	0.913	0.96	1	0.9	1	0.883	1	0.999
Rps20	Rpl19	5034139	5016512	10090.ENSMUSP00000120528	10090.ENSMUSP00000017548	0	0	0	0	0.964	0.971	1	0	0	0.577	1	0.999
Rps8	Rps25	5031065	5027947	10090.ENSMUSP00000099757	10090.ENSMUSP00000079180	0	0	0	0	0.999	0.971	1	0.9	1	0.775	1	0.999
Rps13	Rps5	5034698	5015759	10090.ENSMUSP00000126294	10090.ENSMUSP00000004554	0.042	0	0	0	0.915	0.972	1	0.9	1	0.692	1	0.999
Rps27a	Rpl10a	5031143	5023403	10090.ENSMUSP00000099909	10090.ENSMUSP00000048469	0	0	0	0	0.928	0.896	1	0.9	1	0.444	1	0.999
Rps27a	Rps25	5031143	5027947	10090.ENSMUSP00000099909	10090.ENSMUSP00000079180	0	0	0	0	0.932	0.89	1	0.9	1	0.593	1	0.999
Rps24	Rpl23	5034648	5030904	10090.ENSMUSP00000125977	10090.ENSMUSP00000099435	0	0	0	0	0.999	0.97	1	0	0	0.43	1	0.999
Rpl10a	Rps26	5023403	5018537	10090.ENSMUSP00000048469	10090.ENSMUSP00000026420	0	0	0	0	0.943	0.958	1	0.72	1	0.475	1	0.999
Rps14	Rps11	5018277	5015656	10090.ENSMUSP00000025511	10090.ENSMUSP00000003521	0.172	0	0.232	0	0.999	0.97	1	0.9	1	0.764	1	0.999
Psma2	Psma4	5035328	5020992	10090.ENSMUSP00000129767	10090.ENSMUSP00000034848	0	0	0.324	0.856	0.959	0.971	1	0.9	1	0.883	1	0.999
Rpl35a	Rpl32	5033146	5028158	10090.ENSMUSP00000110731	10090.ENSMUSP00000080523	0	0	0	0	0.91	0.971	1	0.9	1	0.331	1	0.999
Rpl7	Rps14	5026693	5018277	10090.ENSMUSP00000071616	10090.ENSMUSP00000025511	0.119	0	0	0	0.999	0.958	1	0	0	0.737	1	0.999
Rps24	Rps29	5034648	5021660	10090.ENSMUSP00000125977	10090.ENSMUSP00000038352	0	0	0	0	0.831	0.958	1	0.72	1	0.776	1	0.999
Rpl36	Rps5	5027972	5015759	10090.ENSMUSP00000079340	10090.ENSMUSP00000004554	0	0	0	0	0.889	0.95	1	0.9	1	0.521	1	0.999
Psma2	Psmb6	5035328	5016580	10090.ENSMUSP00000129767	10090.ENSMUSP00000018430	0	0	0	0	0.865	0.961	1	0.9	1	0.685	1	0.999
Rpl30	Rps16	5032315	5031918	10090.ENSMUSP00000106014	10090.ENSMUSP00000103940	0.17	0	0	0	0.937	0.971	1	0	0	0.796	1	0.999
Rps21	Rps23	5024953	5024346	10090.ENSMUSP00000058432	10090.ENSMUSP00000054490	0	0	0	0	0.909	0.896	1	0.9	1	0.631	1	0.999
Rpl30	Rps26	5032315	5018537	10090.ENSMUSP00000106014	10090.ENSMUSP00000026420	0	0	0	0	0.854	0.958	1	0.72	1	0.694	1	0.999
Psmb3	Psma6	5030905	5017199	10090.ENSMUSP00000099436	10090.ENSMUSP00000021412	0	0	0	0	0.785	0.949	1	0.9	1	0.573	1	0.999
Rpl31	Rpl22	5036727	5034020	10090.ENSMUSP00000137631	10090.ENSMUSP00000118787	0	0	0	0	0.841	0.97	1	0.72	1	0.702	1	0.999
Rps19	Rpl37	5031943	5023036	10090.ENSMUSP00000104067	10090.ENSMUSP00000046506	0	0	0	0	0.83	0.891	1	0.9	1	0.696	1	0.999
Rps3a1	Rpl8	5019462	5015714	10090.ENSMUSP00000029722	10090.ENSMUSP00000004072	0	0	0.236	0	0.999	0.971	1	0.9	1	0.765	1	0.999
Rpl23	Rpl3	5030904	5028126	10090.ENSMUSP00000099435	10090.ENSMUSP00000080354	0.17	0	0.227	0	0.999	0.871	1	0.9	1	0.424	1	0.999
Uqcrh	Uqcrc2	5027699	5020466	10090.ENSMUSP00000077744	10090.ENSMUSP00000033176	0	0	0	0	0.789	0.821	1	0.9	1	0.833	1	0.999
Rpl39	Rpl37a	5033187	5025033	10090.ENSMUSP00000110886	10090.ENSMUSP00000058919	0	0	0	0	0.937	0.97	1	0.72	1	0.512	1	0.999
Rps23	Rps3a1	5024346	5019462	10090.ENSMUSP00000054490	10090.ENSMUSP00000029722	0	0	0	0	0.959	0.971	1	0.9	1	0.269	1	0.999
Rps19	Rps6	5031943	5031125	10090.ENSMUSP00000104067	10090.ENSMUSP00000099878	0	0	0	0	0.921	0.896	1	0.9	1	0.841	1	0.999
Rpl5	Rps3a1	5028222	5019462	10090.ENSMUSP00000080854	10090.ENSMUSP00000029722	0	0	0	0	0.999	0.855	1	0	0	0.815	1	0.999
Rps23	Rps9	5024346	5015940	10090.ENSMUSP00000054490	10090.ENSMUSP00000006496	0.164	0	0	0	0.898	0.972	1	0.9	1	0.693	1	0.999
Rps8	Rpl19	5031065	5016512	10090.ENSMUSP00000099757	10090.ENSMUSP00000017548	0	0	0	0	0.999	0.971	1	0.9	1	0.785	1	0.999
Rps14	Rps5	5018277	5015759	10090.ENSMUSP00000025511	10090.ENSMUSP00000004554	0.164	0	0	0	0.999	0.971	1	0.9	1	0.806	1	0.999
Rpl32	Rps14	5028158	5018277	10090.ENSMUSP00000080523	10090.ENSMUSP00000025511	0	0	0	0	0.938	0.97	1	0.9	1	0.622	1	0.999
Rps24	Rps16	5034648	5031918	10090.ENSMUSP00000125977	10090.ENSMUSP00000103940	0	0	0	0	0.902	0.97	1	0.72	1	0.625	1	0.999
Rpl30	Rpl37	5032315	5023036	10090.ENSMUSP00000106014	10090.ENSMUSP00000046506	0	0	0	0	0.851	0.971	1	0.9	1	0.694	1	0.999
Rps10	Rps11	5033114	5015656	10090.ENSMUSP00000110532	10090.ENSMUSP00000003521	0	0	0	0	0.891	0.958	1	0.72	1	0.611	1	0.999
Psma3	Psma4	5034579	5020992	10090.ENSMUSP00000125548	10090.ENSMUSP00000034848	0	0	0.283	0.752	0.941	0.97	1	0.9	1	0.88	1	0.999
Rpsa	Rps14	5021080	5018277	10090.ENSMUSP00000035105	10090.ENSMUSP00000025511	0.139	0	0.201	0	0.815	0.958	1	0.72	1	0.616	1	0.999
Rpl22	Rps18	5034020	5016094	10090.ENSMUSP00000118787	10090.ENSMUSP00000008812	0	0	0	0	0.729	0.95	1	0.9	1	0.507	1	0.999
Rps8	Rps3a1	5031065	5019462	10090.ENSMUSP00000099757	10090.ENSMUSP00000029722	0	0	0	0	0.999	0.971	1	0.9	1	0.822	1	0.999
Rps28	Rps6	5033019	5031125	10090.ENSMUSP00000110013	10090.ENSMUSP00000099878	0.172	0	0	0	0.862	0.958	1	0.9	1	0.521	1	0.999
Rpl37a	Rps3	5025033	5020408	10090.ENSMUSP00000058919	10090.ENSMUSP00000032998	0	0	0	0	0.939	0.97	1	0.9	1	0.45	1	0.999
Rps29	Rpl19	5021660	5016512	10090.ENSMUSP00000038352	10090.ENSMUSP00000017548	0.17	0	0	0	0.92	0.969	1	0.72	1	0.618	1	0.999
Rpl22	Rpl38	5034020	5031605	10090.ENSMUSP00000118787	10090.ENSMUSP00000102213	0	0	0	0	0.839	0.896	1	0.9	1	0.788	1	0.999
Rps8	Rpl34	5031065	5028844	10090.ENSMUSP00000099757	10090.ENSMUSP00000086614	0	0	0	0	0.93	0.801	1	0.9	1	0.372	1	0.999
Rpl30	Rps26-ps1	5032315	5027499	10090.ENSMUSP00000106014	10090.ENSMUSP00000076447	0	0	0	0	0.778	0.958	1	0.72	1	0.694	1	0.999
Psma1	Psmb6	5020413	5016580	10090.ENSMUSP00000033008	10090.ENSMUSP00000018430	0	0	0	0	0.908	0.971	1	0.9	1	0.586	1	0.999
Rps19	Rps3a1	5031943	5019462	10090.ENSMUSP00000104067	10090.ENSMUSP00000029722	0	0	0	0	0.951	0.896	1	0.9	1	0.661	1	0.999
Psmb2	Psma6	5019726	5017199	10090.ENSMUSP00000030642	10090.ENSMUSP00000021412	0	0	0	0	0.823	0.962	1	0.9	1	0.749	1	0.999
Rps24	Rps3	5034648	5020408	10090.ENSMUSP00000125977	10090.ENSMUSP00000032998	0	0	0	0	0.873	0.97	1	0.72	1	0.673	1	0.999
Rps19	Rps23	5031943	5024346	10090.ENSMUSP00000104067	10090.ENSMUSP00000054490	0	0	0	0	0.93	0.896	1	0.9	1	0.706	1	0.999
Rpl26	Rps3a1	5026969	5019462	10090.ENSMUSP00000073175	10090.ENSMUSP00000029722	0	0	0.244	0	0.999	0.971	1	0.9	1	0.622	1	0.999
Rps27a	Rps5	5031143	5015759	10090.ENSMUSP00000099909	10090.ENSMUSP00000004554	0	0	0	0	0.935	0.896	1	0.9	1	0.357	1	0.999
Rps27a	Rps3	5031143	5020408	10090.ENSMUSP00000099909	10090.ENSMUSP00000032998	0	0	0	0	0.887	0.896	1	0.9	1	0.394	1	0.999
Rpl36	Rpl37a	5027972	5025033	10090.ENSMUSP00000079340	10090.ENSMUSP00000058919	0	0	0	0	0.903	0.945	1	0.9	1	0.327	1	0.999
Uqcrh	Uqcrfs1	5027699	5022838	10090.ENSMUSP00000077744	10090.ENSMUSP00000045284	0	0	0	0	0.819	0.806	1	0.9	1	0.823	1	0.999
Rps28	Rps16	5033019	5031918	10090.ENSMUSP00000110013	10090.ENSMUSP00000103940	0	0	0	0	0.862	0.958	1	0.72	1	0.492	1	0.999
Psma3	Psmb10	5034579	5020832	10090.ENSMUSP00000125548	10090.ENSMUSP00000034369	0	0	0.248	0	0.756	0.943	1	0.9	1	0.556	1	0.999
Rpl38	Rpl37	5031605	5023036	10090.ENSMUSP00000102213	10090.ENSMUSP00000046506	0	0	0	0	0.867	0.896	1	0.9	1	0.705	1	0.999
Psma3	Psmb7	5034579	5018980	10090.ENSMUSP00000125548	10090.ENSMUSP00000028083	0	0	0.231	0	0.776	0.97	1	0.9	1	0.724	1	0.999
Rpl14	Rpl38	5035620	5031605	10090.ENSMUSP00000131489	10090.ENSMUSP00000102213	0	0	0	0	0.881	0.853	1	0.9	1	0.512	1	0.999
Rps20	Rps25	5034139	5027947	10090.ENSMUSP00000120528	10090.ENSMUSP00000079180	0	0	0	0	0.933	0.972	1	0.72	1	0.813	1	0.999
Rps13	Rps19	5034698	5031943	10090.ENSMUSP00000126294	10090.ENSMUSP00000104067	0	0	0	0	0.912	0.896	1	0.9	1	0.714	1	0.999
Rpl23	Rpl7	5030904	5026693	10090.ENSMUSP00000099435	10090.ENSMUSP00000071616	0.164	0	0	0	0.999	0.962	1	0.72	1	0.225	1	0.999
Rpl30	Rpl8	5032315	5015714	10090.ENSMUSP00000106014	10090.ENSMUSP00000004072	0	0	0	0	0.916	0.971	1	0.9	1	0.702	1	0.999
Rps29	Rpl8	5021660	5015714	10090.ENSMUSP00000038352	10090.ENSMUSP00000004072	0.139	0	0	0	0.863	0.971	1	0.72	1	0.464	1	0.999
Rpl4	Rpl8	5021039	5015714	10090.ENSMUSP00000034966	10090.ENSMUSP00000004072	0.139	0	0	0	0.939	0.846	1	0.9	1	0.673	1	0.999
Rpl36	Rpl19	5027972	5016512	10090.ENSMUSP00000079340	10090.ENSMUSP00000017548	0	0	0	0	0.914	0.95	1	0.9	1	0.546	1	0.999
Rps16	Rps14	5031918	5018277	10090.ENSMUSP00000103940	10090.ENSMUSP00000025511	0.139	0	0	0	0.94	0.97	1	0.72	1	0.761	1	0.999
Rpl37	Rpl19	5023036	5016512	10090.ENSMUSP00000046506	10090.ENSMUSP00000017548	0	0	0	0	0.825	0.971	1	0.9	1	0.489	1	0.999
Rpl35a	Rpl3	5033146	5028126	10090.ENSMUSP00000110731	10090.ENSMUSP00000080354	0	0	0	0	0.914	0.86	1	0.9	1	0.447	1	0.999
Snap25	Vamp2	5019145	5017153	10090.ENSMUSP00000028727	10090.ENSMUSP00000021273	0	0	0	0	0.177	0.984	1	0.9	1	0.945	1	0.999
Rpl37	Rps9	5023036	5015940	10090.ENSMUSP00000046506	10090.ENSMUSP00000006496	0	0	0	0	0.824	0.972	1	0.9	1	0.45	1	0.999
Rpl34	Rpl37a	5028844	5025033	10090.ENSMUSP00000086614	10090.ENSMUSP00000058919	0	0	0	0	0.928	0.801	1	0.9	1	0.498	1	0.999
Psmb7	Psmb4	5018980	5015885	10090.ENSMUSP00000028083	10090.ENSMUSP00000005923	0	0	0	0	0.794	0.96	1	0.9	1	0.763	1	0.999
Rps19	Rpl26	5031943	5026969	10090.ENSMUSP00000104067	10090.ENSMUSP00000073175	0	0	0	0	0.938	0.896	1	0.9	1	0.875	1	0.999
Rpl31	Rpl37	5036727	5023036	10090.ENSMUSP00000137631	10090.ENSMUSP00000046506	0	0	0	0	0.866	0.971	1	0.72	1	0.542	1	0.999
Rpl3	Rps25	5028126	5027947	10090.ENSMUSP00000080354	10090.ENSMUSP00000079180	0	0	0	0	0.999	0.854	1	0.9	1	0.336	1	0.999
Rpl31	Rpl37a	5036727	5025033	10090.ENSMUSP00000137631	10090.ENSMUSP00000058919	0	0	0	0	0.999	0.97	1	0.72	1	0.596	1	0.999
Rpl35a	Rpl23	5033146	5030904	10090.ENSMUSP00000110731	10090.ENSMUSP00000099435	0	0	0	0	0.999	0.971	1	0.9	1	0.356	1	0.999
Rps29	Rps26	5021660	5018537	10090.ENSMUSP00000038352	10090.ENSMUSP00000026420	0	0	0	0	0.925	0.956	1	0.72	1	0.713	1	0.999
Rpl38	Rpl19	5031605	5016512	10090.ENSMUSP00000102213	10090.ENSMUSP00000017548	0	0	0	0	0.951	0.896	1	0.9	1	0.743	1	0.999
Rpl36	Rps9	5027972	5015940	10090.ENSMUSP00000079340	10090.ENSMUSP00000006496	0	0	0	0	0.741	0.95	1	0.9	1	0.544	1	0.999
Rps13	Rps20	5034698	5034139	10090.ENSMUSP00000126294	10090.ENSMUSP00000120528	0	0	0	0	0.917	0.972	1	0.72	1	0.815	1	0.999
Rps28	Rpl26	5033019	5026969	10090.ENSMUSP00000110013	10090.ENSMUSP00000073175	0	0	0	0	0.941	0.958	1	0.9	1	0.615	1	0.999
Rpl30	Rps6	5032315	5031125	10090.ENSMUSP00000106014	10090.ENSMUSP00000099878	0	0	0	0	0.932	0.971	1	0.9	1	0.72	1	0.999
Rpl18	Rpl19	5031793	5016512	10090.ENSMUSP00000103365	10090.ENSMUSP00000017548	0	0	0	0	0.961	0.962	1	0.9	1	0.634	1	0.999
Psmb9	Psma4	5035932	5020992	10090.ENSMUSP00000133499	10090.ENSMUSP00000034848	0	0	0	0	0.769	0.949	1	0.9	1	0.587	1	0.999
Psma4	Psmb2	5020992	5019726	10090.ENSMUSP00000034848	10090.ENSMUSP00000030642	0	0	0	0	0.909	0.967	1	0.9	1	0.743	1	0.999
Rpl30	Rps23	5032315	5024346	10090.ENSMUSP00000106014	10090.ENSMUSP00000054490	0.172	0	0	0	0.939	0.971	1	0.9	1	0.658	1	0.999
Rps3	Rps26	5020408	5018537	10090.ENSMUSP00000032998	10090.ENSMUSP00000026420	0	0	0	0	0.853	0.958	1	0.72	1	0.675	1	0.999
Rps13	Rps6	5034698	5031125	10090.ENSMUSP00000126294	10090.ENSMUSP00000099878	0.075	0	0	0	0.918	0.971	1	0.9	1	0.5	1	0.999
Rpl3	Rpl6	5028126	5020043	10090.ENSMUSP00000080354	10090.ENSMUSP00000031617	0.088	0	0	0	0.857	0.795	1	0.9	1	0.733	1	0.999
Rps19	Rps5	5031943	5015759	10090.ENSMUSP00000104067	10090.ENSMUSP00000004554	0	0	0	0	0.961	0.896	1	0.9	1	0.762	1	0.999
Rps23	Rps14	5024346	5018277	10090.ENSMUSP00000054490	10090.ENSMUSP00000025511	0.164	0	0	0	0.918	0.971	1	0.9	1	0.739	1	0.999
Psma4	Psma6	5020992	5017199	10090.ENSMUSP00000034848	10090.ENSMUSP00000021412	0	0	0.323	0.814	0.926	0.971	1	0.9	1	0.84	1	0.999
Rps19	Rps8	5031943	5031065	10090.ENSMUSP00000104067	10090.ENSMUSP00000099757	0	0	0	0	0.966	0.896	1	0.9	1	0.766	1	0.999
Rpl31	Rpl23	5036727	5030904	10090.ENSMUSP00000137631	10090.ENSMUSP00000099435	0	0	0	0	0.933	0.971	1	0.72	1	0.454	1	0.999
Snap25	Stx1a	5019145	5015843	10090.ENSMUSP00000028727	10090.ENSMUSP00000005509	0	0	0	0	0.175	0.945	1	0.9	1	0.938	1	0.999
Rpl38	Rpl5	5031605	5028222	10090.ENSMUSP00000102213	10090.ENSMUSP00000080854	0	0	0	0	0.881	0.869	1	0.72	1	0.82	1	0.999
Rpl38	Rpl10a	5031605	5023403	10090.ENSMUSP00000102213	10090.ENSMUSP00000048469	0	0	0	0	0.906	0.896	1	0.9	1	0.681	1	0.999
Rpl7	Rpl10a	5026693	5023403	10090.ENSMUSP00000071616	10090.ENSMUSP00000048469	0.114	0	0	0	0.962	0.824	1	0.72	1	0.575	1	0.999
Rpl36	Rps3a1	5027972	5019462	10090.ENSMUSP00000079340	10090.ENSMUSP00000029722	0	0	0	0	0.734	0.95	1	0.9	1	0.412	1	0.999
Rpl37	Rps18	5023036	5016094	10090.ENSMUSP00000046506	10090.ENSMUSP00000008812	0	0	0	0	0.736	0.95	1	0.9	1	0.498	1	0.999
Rpl31	Rps26-ps1	5036727	5027499	10090.ENSMUSP00000137631	10090.ENSMUSP00000076447	0	0	0	0	0.778	0.958	1	0.72	1	0.684	1	0.999
Rps23	Rps3	5024346	5020408	10090.ENSMUSP00000054490	10090.ENSMUSP00000032998	0.172	0	0	0	0.922	0.972	1	0.9	1	0.529	1	0.999
Rps16	Rpl18	5031918	5031793	10090.ENSMUSP00000103940	10090.ENSMUSP00000103365	0.17	0	0	0	0.94	0.97	1	0	0	0.84	1	0.999
Cox6c	Cox5a	5016303	5015244	10090.ENSMUSP00000014457	10090.ENSMUSP00000000090	0	0	0	0	0.86	0.798	1	0.9	1	0.804	1	0.999
Rpl23	Rps18	5030904	5016094	10090.ENSMUSP00000099435	10090.ENSMUSP00000008812	0.17	0	0	0	0.816	0.95	1	0.9	1	0.414	1	0.999
Rpl35a	Rps5	5033146	5015759	10090.ENSMUSP00000110731	10090.ENSMUSP00000004554	0	0	0	0	0.909	0.971	1	0.9	1	0.225	1	0.999
Rpl18	Rpl4	5031793	5021039	10090.ENSMUSP00000103365	10090.ENSMUSP00000034966	0.17	0	0	0	0.893	0.816	1	0.9	1	0.699	1	0.999
Rps25	Rps23	5027947	5024346	10090.ENSMUSP00000079180	10090.ENSMUSP00000054490	0	0	0	0	0.918	0.971	1	0.9	1	0.729	1	0.999
Psma3	Psmb5	5034579	5017622	10090.ENSMUSP00000125548	10090.ENSMUSP00000022803	0	0	0	0	0.719	0.968	1	0.9	1	0.716	1	0.999
Rpl30	Rps27a	5032315	5031143	10090.ENSMUSP00000106014	10090.ENSMUSP00000099909	0	0	0	0	0.934	0.896	1	0.9	1	0.305	1	0.999
Rps3	Rps14	5020408	5018277	10090.ENSMUSP00000032998	10090.ENSMUSP00000025511	0.172	0	0.247	0	0.999	0.971	1	0.9	1	0.841	1	0.999
Rps5	Rpl8	5015759	5015714	10090.ENSMUSP00000004554	10090.ENSMUSP00000004072	0.164	0	0	0	0.998	0.972	1	0.9	1	0.784	1	0.999
Rpl35a	Rps6	5033146	5031125	10090.ENSMUSP00000110731	10090.ENSMUSP00000099878	0	0	0	0	0.92	0.971	1	0.9	1	0.537	1	0.999
Syt1	Snap25	5031362	5019145	10090.ENSMUSP00000100912	10090.ENSMUSP00000028727	0	0	0	0	0.374	0.971	1	0.9	1	0.901	1	0.999
Rpl23	Rps5	5030904	5015759	10090.ENSMUSP00000099435	10090.ENSMUSP00000004554	0.172	0	0	0	0.999	0.971	1	0.9	1	0.509	1	0.999
Rps13	Rps18	5034698	5016094	10090.ENSMUSP00000126294	10090.ENSMUSP00000008812	0.042	0	0	0	0.793	0.95	1	0.9	1	0.593	1	0.999
Rpl36	Rpl37	5027972	5023036	10090.ENSMUSP00000079340	10090.ENSMUSP00000046506	0	0	0	0	0.684	0.95	1	0.9	1	0.452	1	0.999
Rpl18	Rpl8	5031793	5015714	10090.ENSMUSP00000103365	10090.ENSMUSP00000004072	0	0	0	0	0.967	0.97	1	0.9	1	0.693	1	0.999
Rps24	Rps11	5034648	5015656	10090.ENSMUSP00000125977	10090.ENSMUSP00000003521	0	0	0	0	0.999	0.97	1	0.72	1	0.793	1	0.999
Rpl23	Rps14	5030904	5018277	10090.ENSMUSP00000099435	10090.ENSMUSP00000025511	0.172	0	0.361	0	0.999	0.97	1	0.9	1	0.401	1	0.999
Rpl18	Rps5	5031793	5015759	10090.ENSMUSP00000103365	10090.ENSMUSP00000004554	0	0	0	0	0.961	0.889	1	0.9	1	0.641	1	0.999
Psma1	Psmb5	5020413	5017622	10090.ENSMUSP00000033008	10090.ENSMUSP00000022803	0	0	0	0	0.712	0.975	1	0.9	1	0.732	1	0.999
Rps13	Rpl38	5034698	5031605	10090.ENSMUSP00000126294	10090.ENSMUSP00000102213	0	0	0	0	0.875	0.896	1	0.9	1	0.513	1	0.999
Psmc2	Psma6	5019763	5017199	10090.ENSMUSP00000030769	10090.ENSMUSP00000021412	0	0	0	0	0.82	0.89	1	0.9	1	0.605	1	0.999
Uqcrh	Cyc1	5027699	5017751	10090.ENSMUSP00000077744	10090.ENSMUSP00000023210	0	0	0	0	0.818	0.909	1	0.9	1	0.779	1	0.999
Rpl14	Rps9	5035620	5015940	10090.ENSMUSP00000131489	10090.ENSMUSP00000006496	0.107	0	0	0	0.908	0.855	1	0.9	1	0.559	1	0.999
Atp5f1	Atp5o	5033489	5017883	10090.ENSMUSP00000113022	10090.ENSMUSP00000023677	0	0	0	0	0.945	0.806	1	0.9	1	0.84	1	0.999
Rps25	Rpl8	5027947	5015714	10090.ENSMUSP00000079180	10090.ENSMUSP00000004072	0	0	0	0	0.999	0.971	1	0.9	1	0.501	1	0.999
Rpl3	Rps23	5028126	5024346	10090.ENSMUSP00000080354	10090.ENSMUSP00000054490	0.139	0	0.218	0	0.909	0.871	1	0.9	1	0.636	1	0.999
Rps15a	Rpl38	5034103	5031605	10090.ENSMUSP00000119975	10090.ENSMUSP00000102213	0	0	0	0	0.915	0.896	1	0.9	1	0.527	1	0.999
Rps8	Rpl23	5031065	5030904	10090.ENSMUSP00000099757	10090.ENSMUSP00000099435	0	0	0	0	0.999	0.971	1	0.9	1	0.2	1	0.999
Rps13	Rpl36	5034698	5027972	10090.ENSMUSP00000126294	10090.ENSMUSP00000079340	0	0	0	0	0.729	0.95	1	0.9	1	0.541	1	0.999
Rpl36	Rpl8	5027972	5015714	10090.ENSMUSP00000079340	10090.ENSMUSP00000004072	0	0	0	0	0.91	0.95	1	0.9	1	0.62	1	0.999
Rpl18	Rpl37a	5031793	5025033	10090.ENSMUSP00000103365	10090.ENSMUSP00000058919	0.046	0	0	0	0.941	0.969	1	0.9	1	0.237	1	0.999
Psmb3	Psmb6	5030905	5016580	10090.ENSMUSP00000099436	10090.ENSMUSP00000018430	0	0	0	0.653	0.818	0.944	1	0.9	1	0.615	1	0.999
Rps15	Rps26	5026344	5018537	10090.ENSMUSP00000069004	10090.ENSMUSP00000026420	0	0	0	0	0.898	0.945	1	0.72	1	0.756	1	0.999
Rpl18	Rps3a1	5031793	5019462	10090.ENSMUSP00000103365	10090.ENSMUSP00000029722	0	0	0	0	0.935	0.882	1	0.9	1	0.214	1	0.999
Rps20	Rps3a1	5034139	5019462	10090.ENSMUSP00000120528	10090.ENSMUSP00000029722	0	0	0	0	0.926	0.971	1	0.72	1	0.634	1	0.999
Psmc3	Psmb5	5026606	5017622	10090.ENSMUSP00000071054	10090.ENSMUSP00000022803	0.06	0	0	0	0.843	0.905	1	0.9	1	0.743	1	0.999
Rpl22	Rpl8	5034020	5015714	10090.ENSMUSP00000118787	10090.ENSMUSP00000004072	0	0	0	0	0.847	0.971	1	0.9	1	0.181	1	0.999
Rpl18	Rpl23	5031793	5030904	10090.ENSMUSP00000103365	10090.ENSMUSP00000099435	0	0	0	0	0.914	0.97	1	0.9	1	0.138	1	0.999
Rps14	Rpl19	5018277	5016512	10090.ENSMUSP00000025511	10090.ENSMUSP00000017548	0	0	0.282	0	0.959	0.97	1	0.9	1	0.789	1	0.999
Psmb3	Psmb5	5030905	5017622	10090.ENSMUSP00000099436	10090.ENSMUSP00000022803	0	0	0	0.631	0.822	0.944	1	0.9	1	0.687	1	0.999
Psmb5	Psmb1	5017622	5016329	10090.ENSMUSP00000022803	10090.ENSMUSP00000014913	0	0	0	0.605	0.823	0.959	1	0.9	1	0.812	1	0.999
Rpl22	Rpl10a	5034020	5023403	10090.ENSMUSP00000118787	10090.ENSMUSP00000048469	0	0	0	0	0.876	0.971	1	0.9	1	0.725	1	0.999
Rpl37	Rps3a1	5023036	5019462	10090.ENSMUSP00000046506	10090.ENSMUSP00000029722	0	0	0	0	0.823	0.971	1	0.9	1	0.245	1	0.999
Rpl26	Rpl19	5026969	5016512	10090.ENSMUSP00000073175	10090.ENSMUSP00000017548	0.172	0	0.311	0	0.961	0.971	1	0.9	1	0.781	1	0.999
Cox5b	Cox5a	5028064	5015244	10090.ENSMUSP00000079944	10090.ENSMUSP00000000090	0	0	0	0	0.856	0.731	1	0.9	1	0.84	1	0.999
Psma7	Psmb4	5019262	5015885	10090.ENSMUSP00000029082	10090.ENSMUSP00000005923	0	0	0	0	0.903	0.951	1	0.9	1	0.757	1	0.999
Psma2	Psmb5	5035328	5017622	10090.ENSMUSP00000129767	10090.ENSMUSP00000022803	0	0	0	0	0.807	0.968	1	0.9	1	0.622	1	0.999
Rps13	Rpl37	5034698	5023036	10090.ENSMUSP00000126294	10090.ENSMUSP00000046506	0	0	0	0	0.828	0.972	1	0.9	1	0.386	1	0.999
Rpl23	Rpl36	5030904	5027972	10090.ENSMUSP00000099435	10090.ENSMUSP00000079340	0	0	0	0	0.799	0.95	1	0.9	1	0.372	1	0.999
Rps15	Rps5	5026344	5015759	10090.ENSMUSP00000069004	10090.ENSMUSP00000004554	0.164	0	0	0	0.908	0.958	1	0.72	1	0.705	1	0.999
Rpl22	Rpl37a	5034020	5025033	10090.ENSMUSP00000118787	10090.ENSMUSP00000058919	0	0	0	0	0.919	0.97	1	0.9	1	0.376	1	0.999
Rps19	Rpl10a	5031943	5023403	10090.ENSMUSP00000104067	10090.ENSMUSP00000048469	0.172	0	0	0	0.999	0.89	1	0.9	1	0.65	1	0.999
Rps23	Rps5	5024346	5015759	10090.ENSMUSP00000054490	10090.ENSMUSP00000004554	0.164	0	0	0	0.897	0.972	1	0.9	1	0.567	1	0.999
Rpl14	Rps5	5035620	5015759	10090.ENSMUSP00000131489	10090.ENSMUSP00000004554	0.096	0	0	0	0.882	0.858	1	0.9	1	0.479	1	0.999
Rpl31	Rpl10a	5036727	5023403	10090.ENSMUSP00000137631	10090.ENSMUSP00000048469	0.172	0	0	0	0.912	0.97	1	0.72	1	0.699	1	0.999
Rpl23	Rps3a1	5030904	5019462	10090.ENSMUSP00000099435	10090.ENSMUSP00000029722	0	0	0	0	0.999	0.971	1	0.9	1	0.395	1	0.999
Psma4	Psmb7	5020992	5018980	10090.ENSMUSP00000034848	10090.ENSMUSP00000028083	0	0	0.245	0	0.858	0.96	1	0.9	1	0.678	1	0.999
Rps19	Rpl3	5031943	5028126	10090.ENSMUSP00000104067	10090.ENSMUSP00000080354	0	0	0	0	0.999	0.861	1	0.9	1	0.727	1	0.999
Rps13	Rpl23	5034698	5030904	10090.ENSMUSP00000126294	10090.ENSMUSP00000099435	0	0	0	0	0.91	0.971	1	0.9	1	0.617	1	0.999
Rpl30	Rpl36	5032315	5027972	10090.ENSMUSP00000106014	10090.ENSMUSP00000079340	0	0	0	0	0.736	0.95	1	0.9	1	0.356	1	0.999
Rps6	Rps18	5031125	5016094	10090.ENSMUSP00000099878	10090.ENSMUSP00000008812	0	0	0	0	0.81	0.95	1	0.9	1	0.544	1	0.999
Rpl18	Rps14	5031793	5018277	10090.ENSMUSP00000103365	10090.ENSMUSP00000025511	0.172	0	0	0	0.911	0.969	1	0.9	1	0.576	1	0.999
Cox7c	Uqcrq	5033801	5024138	10090.ENSMUSP00000115419	10090.ENSMUSP00000053145	0	0	0	0	0.916	0.779	1	0.9	1	0.568	1	0.999
Rps8	Rps26	5031065	5018537	10090.ENSMUSP00000099757	10090.ENSMUSP00000026420	0	0	0	0	0.949	0.958	1	0.72	1	0.339	1	0.999
Rpl14	Rpl7	5035620	5026693	10090.ENSMUSP00000131489	10090.ENSMUSP00000071616	0.077	0	0	0	0.917	0.841	1	0.72	1	0.765	1	0.999
Rpl39	Rpl19	5033187	5016512	10090.ENSMUSP00000110886	10090.ENSMUSP00000017548	0	0	0	0	0.885	0.971	1	0.72	1	0.698	1	0.999
Psmb9	Psmb2	5035932	5019726	10090.ENSMUSP00000133499	10090.ENSMUSP00000030642	0	0	0	0	0.769	0.959	1	0.9	1	0.657	1	0.999
Atp5f1	Atp5d	5033489	5031383	10090.ENSMUSP00000113022	10090.ENSMUSP00000101006	0	0	0	0	0.868	0.859	1	0.9	1	0.788	1	0.999
Rpl31	Rps15a	5036727	5034103	10090.ENSMUSP00000137631	10090.ENSMUSP00000119975	0	0	0	0	0.917	0.971	1	0	0	0.62	1	0.999
Rps20	Rps26	5034139	5018537	10090.ENSMUSP00000120528	10090.ENSMUSP00000026420	0	0	0	0	0.856	0.958	1	0.72	1	0.612	1	0.999
Psma4	Psmb5	5020992	5017622	10090.ENSMUSP00000034848	10090.ENSMUSP00000022803	0	0	0	0	0.72	0.967	1	0.9	1	0.63	1	0.999
Rplp2	Rps25	5028293	5027947	10090.ENSMUSP00000081474	10090.ENSMUSP00000079180	0	0	0	0	0.88	0.858	1	0.9	1	0.653	1	0.999
Rps28	Rps21	5033019	5024953	10090.ENSMUSP00000110013	10090.ENSMUSP00000058432	0	0	0	0	0.955	0.801	1	0.9	1	0.625	1	0.999
Rpl38	Rps25	5031605	5027947	10090.ENSMUSP00000102213	10090.ENSMUSP00000079180	0	0	0	0	0.938	0.896	1	0.9	1	0.841	1	0.999
Rpl22	Rpl26	5034020	5026969	10090.ENSMUSP00000118787	10090.ENSMUSP00000073175	0	0	0	0	0.91	0.971	1	0.9	1	0.796	1	0.999
Rpl3	Rps11	5028126	5015656	10090.ENSMUSP00000080354	10090.ENSMUSP00000003521	0.17	0	0	0	0.999	0.862	1	0.9	1	0.622	1	0.999
Rpl14	Rpl22	5035620	5034020	10090.ENSMUSP00000131489	10090.ENSMUSP00000118787	0	0	0	0	0.83	0.856	1	0.9	1	0.674	1	0.999
Rps21	Rps3	5024953	5020408	10090.ENSMUSP00000058432	10090.ENSMUSP00000032998	0	0	0	0	0.929	0.889	1	0.9	1	0.325	1	0.999
Rpl39	Rpl32	5033187	5028158	10090.ENSMUSP00000110886	10090.ENSMUSP00000080523	0	0	0	0	0.909	0.97	1	0.72	1	0.309	1	0.999
Rpl3	Rpl19	5028126	5016512	10090.ENSMUSP00000080354	10090.ENSMUSP00000017548	0.17	0	0.287	0	0.941	0.851	1	0.9	1	0.716	1	0.999
Rps16	Rps11	5031918	5015656	10090.ENSMUSP00000103940	10090.ENSMUSP00000003521	0.17	0	0	0	0.98	0.972	1	0.72	1	0.703	1	0.999
Rps25	Rps26	5027947	5018537	10090.ENSMUSP00000079180	10090.ENSMUSP00000026420	0	0	0	0	0.907	0.958	1	0.72	1	0.672	1	0.999
Rpl5	Rpl3	5028222	5028126	10090.ENSMUSP00000080854	10090.ENSMUSP00000080354	0.17	0	0	0	0.999	0.854	1	0.72	1	0.792	1	0.999
Rpl4	Rps11	5021039	5015656	10090.ENSMUSP00000034966	10090.ENSMUSP00000003521	0.17	0	0	0	0.92	0.831	1	0.9	1	0.565	1	0.999
Rps28	Rpl37	5033019	5023036	10090.ENSMUSP00000110013	10090.ENSMUSP00000046506	0	0	0	0	0.801	0.958	1	0.9	1	0.584	1	0.999
Rps15	Rps9	5026344	5015940	10090.ENSMUSP00000069004	10090.ENSMUSP00000006496	0.164	0	0	0	0.843	0.958	1	0.72	1	0.791	1	0.999
Rps19	Rpl37a	5031943	5025033	10090.ENSMUSP00000104067	10090.ENSMUSP00000058919	0	0	0	0	0.941	0.889	1	0.9	1	0.509	1	0.999
Rpl19	Rps5	5016512	5015759	10090.ENSMUSP00000017548	10090.ENSMUSP00000004554	0	0	0	0	0.977	0.896	1	0.9	1	0.6	1	0.999
Rpl35a	Rps26	5033146	5018537	10090.ENSMUSP00000110731	10090.ENSMUSP00000026420	0	0	0	0	0.861	0.958	1	0	0	0.843	1	0.999
Rps29	Rps5	5021660	5015759	10090.ENSMUSP00000038352	10090.ENSMUSP00000004554	0.139	0	0	0	0.906	0.971	1	0.72	1	0.589	1	0.999
Rpl31	Rps3a1	5036727	5019462	10090.ENSMUSP00000137631	10090.ENSMUSP00000029722	0	0	0	0	0.949	0.97	1	0	0	0.727	1	0.999
Rpl10a	Rpl8	5023403	5015714	10090.ENSMUSP00000048469	10090.ENSMUSP00000004072	0.164	0	0	0	0.999	0.971	1	0.9	1	0.605	1	0.999
Rps23	Rpl37	5024346	5023036	10090.ENSMUSP00000054490	10090.ENSMUSP00000046506	0	0	0	0	0.836	0.972	1	0.9	1	0.512	1	0.999
Rpl18	Rpl26	5031793	5026969	10090.ENSMUSP00000103365	10090.ENSMUSP00000073175	0	0	0	0	0.937	0.97	1	0.9	1	0.586	1	0.999
Rps19	Rpl8	5031943	5015714	10090.ENSMUSP00000104067	10090.ENSMUSP00000004072	0	0	0	0	0.999	0.896	1	0.9	1	0.636	1	0.999
Rpl37	Rps11	5023036	5015656	10090.ENSMUSP00000046506	10090.ENSMUSP00000003521	0	0	0	0	0.829	0.972	1	0.9	1	0.363	1	0.999
Rps8	Rpl37a	5031065	5025033	10090.ENSMUSP00000099757	10090.ENSMUSP00000058919	0	0	0	0	0.97	0.97	1	0.9	1	0.553	1	0.999
Rpl18	Rps9	5031793	5015940	10090.ENSMUSP00000103365	10090.ENSMUSP00000006496	0.172	0	0	0	0.936	0.867	1	0.9	1	0.629	1	0.999
Rpl39	Rpl38	5033187	5031605	10090.ENSMUSP00000110886	10090.ENSMUSP00000102213	0	0	0	0	0.909	0.894	1	0.72	1	0.759	1	0.999
Rps15a	Rpl37	5034103	5023036	10090.ENSMUSP00000119975	10090.ENSMUSP00000046506	0	0	0	0	0.856	0.972	1	0.9	1	0.493	1	0.999
Rpl38	Rps23	5031605	5024346	10090.ENSMUSP00000102213	10090.ENSMUSP00000054490	0	0	0	0	0.892	0.896	1	0.9	1	0.217	1	0.999
Rpl18	Rpl38	5031793	5031605	10090.ENSMUSP00000103365	10090.ENSMUSP00000102213	0	0	0	0	0.909	0.883	1	0.9	1	0.364	1	0.999
Rpl39	Rpl35a	5033187	5033146	10090.ENSMUSP00000110886	10090.ENSMUSP00000110731	0	0	0	0	0.928	0.97	1	0.72	1	0.58	1	0.999
Rpl32	Rpl8	5028158	5015714	10090.ENSMUSP00000080523	10090.ENSMUSP00000004072	0.164	0	0	0	0.939	0.971	1	0.9	1	0.477	1	0.999
Psma1	Psmb2	5020413	5019726	10090.ENSMUSP00000033008	10090.ENSMUSP00000030642	0	0	0	0	0.955	0.972	1	0.9	1	0.787	1	0.999
Psma5	Psma4	5028998	5020992	10090.ENSMUSP00000088057	10090.ENSMUSP00000034848	0	0	0.414	0.827	0.834	0.958	1	0.9	1	0.772	1	0.999
Rps8	Rps18	5031065	5016094	10090.ENSMUSP00000099757	10090.ENSMUSP00000008812	0	0	0	0	0.854	0.95	1	0.9	1	0.764	1	0.999
Hadha	Hadhb	5034171	5033090	10090.ENSMUSP00000120976	10090.ENSMUSP00000110434	0.056	0.038	0.321	0	0.862	0.845	1	0.9	1	0.889	1	0.999
Rps28	Rps3	5033019	5020408	10090.ENSMUSP00000110013	10090.ENSMUSP00000032998	0	0	0	0	0.862	0.958	1	0.9	1	0.471	1	0.999
Psmb2	Psmb7	5019726	5018980	10090.ENSMUSP00000030642	10090.ENSMUSP00000028083	0	0	0	0	0.777	0.96	1	0.9	1	0.757	1	0.999
Cyc1	Cox5a	5017751	5015244	10090.ENSMUSP00000023210	10090.ENSMUSP00000000090	0	0	0	0	0.875	0.796	1	0.9	1	0.756	1	0.999
Rps17	Rps9	5028013	5015940	10090.ENSMUSP00000079628	10090.ENSMUSP00000006496	0	0	0	0	0.889	0.972	1	0.72	1	0.64	1	0.999
Rps27a	Rps21	5031143	5024953	10090.ENSMUSP00000099909	10090.ENSMUSP00000058432	0	0	0	0	0.949	0.889	1	0.9	1	0.271	1	0.999
Rps8	Rps3	5031065	5020408	10090.ENSMUSP00000099757	10090.ENSMUSP00000032998	0	0	0	0	0.999	0.97	1	0.9	1	0.782	1	0.999
Rps24	Rpl8	5034648	5015714	10090.ENSMUSP00000125977	10090.ENSMUSP00000004072	0	0	0	0	0.999	0.97	1	0	0	0.675	1	0.999
Psmb1	Psmb4	5016329	5015885	10090.ENSMUSP00000014913	10090.ENSMUSP00000005923	0	0	0	0	0.896	0.96	1	0.9	1	0.8	1	0.999
Rpl35a	Rps3a1	5033146	5019462	10090.ENSMUSP00000110731	10090.ENSMUSP00000029722	0	0	0	0	0.941	0.971	1	0.9	1	0.354	1	0.999
Rps15	Rps3a1	5026344	5019462	10090.ENSMUSP00000069004	10090.ENSMUSP00000029722	0	0	0	0	0.866	0.958	1	0.72	1	0.699	1	0.999
Rpl5	Rpl19	5028222	5016512	10090.ENSMUSP00000080854	10090.ENSMUSP00000017548	0.193	0	0	0	0.934	0.857	1	0.72	1	0.739	1	0.999
Rps25	Rps21	5027947	5024953	10090.ENSMUSP00000079180	10090.ENSMUSP00000058432	0	0	0	0	0.965	0.896	1	0.9	1	0.619	1	0.999
Rps27a	Rpl26	5031143	5026969	10090.ENSMUSP00000099909	10090.ENSMUSP00000073175	0	0	0	0	0.946	0.896	1	0.9	1	0.352	1	0.999
Rpl30	Rps18	5032315	5016094	10090.ENSMUSP00000106014	10090.ENSMUSP00000008812	0	0	0	0	0.805	0.95	1	0.9	1	0.538	1	0.999
Rps28	Rpl8	5033019	5015714	10090.ENSMUSP00000110013	10090.ENSMUSP00000004072	0	0	0	0	0.921	0.958	1	0.9	1	0.489	1	0.999
Rpl10a	Rps14	5023403	5018277	10090.ENSMUSP00000048469	10090.ENSMUSP00000025511	0.164	0	0	0	0.942	0.97	1	0.9	1	0.63	1	0.999
Rpl38	Rps27a	5031605	5031143	10090.ENSMUSP00000102213	10090.ENSMUSP00000099909	0	0	0	0	0.948	0.896	1	0.9	1	0.152	1	0.999
Rps13	Rps17	5034698	5028013	10090.ENSMUSP00000126294	10090.ENSMUSP00000079628	0	0	0	0	0.875	0.972	1	0.72	1	0.795	1	0.999
Rpl39	Rpl7	5033187	5026693	10090.ENSMUSP00000110886	10090.ENSMUSP00000071616	0	0	0	0	0.826	0.954	1	0.72	1	0.683	1	0.999
Rps15a	Rps3	5034103	5020408	10090.ENSMUSP00000119975	10090.ENSMUSP00000032998	0.193	0	0	0	0.919	0.972	1	0.9	1	0.638	1	0.999
Atp5d	Atp5e	5031383	5016447	10090.ENSMUSP00000101006	10090.ENSMUSP00000016396	0	0	0	0	0.824	0.805	1	0.9	1	0.799	1	0.999
Rpl36	Rpl10a	5027972	5023403	10090.ENSMUSP00000079340	10090.ENSMUSP00000048469	0	0	0	0	0.905	0.95	1	0.9	1	0.294	1	0.999
Rps23	Rpsa	5024346	5021080	10090.ENSMUSP00000054490	10090.ENSMUSP00000035105	0.122	0	0	0	0.808	0.958	1	0.72	1	0.597	1	0.999
Rpl31	Rps5	5036727	5015759	10090.ENSMUSP00000137631	10090.ENSMUSP00000004554	0	0	0	0	0.887	0.971	1	0	0	0.717	1	0.999
Rps15a	Rps5	5034103	5015759	10090.ENSMUSP00000119975	10090.ENSMUSP00000004554	0.172	0	0	0	0.999	0.972	1	0.9	1	0.631	1	0.999
Rpl38	Rps11	5031605	5015656	10090.ENSMUSP00000102213	10090.ENSMUSP00000003521	0	0	0	0	0.962	0.896	1	0.9	1	0.465	1	0.999
Psmd8	Psma4	5023901	5020992	10090.ENSMUSP00000051657	10090.ENSMUSP00000034848	0	0	0	0	0.813	0.881	1	0.9	1	0.616	1	0.999
Rpl37a	Rpl37	5025033	5023036	10090.ENSMUSP00000058919	10090.ENSMUSP00000046506	0	0	0	0	0.844	0.97	1	0.9	1	0.792	1	0.999
Rps19	Rpl38	5031943	5031605	10090.ENSMUSP00000104067	10090.ENSMUSP00000102213	0	0	0	0	0.898	0.896	1	0.9	1	0.858	1	0.999
Rps15a	Rpl23	5034103	5030904	10090.ENSMUSP00000119975	10090.ENSMUSP00000099435	0.193	0	0.205	0	0.999	0.971	1	0.9	1	0.527	1	0.999
Rpl38	Rps8	5031605	5031065	10090.ENSMUSP00000102213	10090.ENSMUSP00000099757	0	0	0	0	0.937	0.896	1	0.9	1	0.58	1	0.999
Rpl22	Rpl19	5034020	5016512	10090.ENSMUSP00000118787	10090.ENSMUSP00000017548	0	0	0	0	0.834	0.874	1	0.9	1	0.673	1	0.999
Psma1	Psmb1	5020413	5016329	10090.ENSMUSP00000033008	10090.ENSMUSP00000014913	0	0	0	0	0.911	0.971	1	0.9	1	0.832	1	0.999
Rpl31	Rps20	5036727	5034139	10090.ENSMUSP00000137631	10090.ENSMUSP00000120528	0	0	0	0	0.918	0.97	1	0	0	0.801	1	0.999
Rplp2	Rpl19	5028293	5016512	10090.ENSMUSP00000081474	10090.ENSMUSP00000017548	0	0	0	0	0.879	0.861	1	0.9	1	0.656	1	0.999
Rpl38	Rpl37a	5031605	5025033	10090.ENSMUSP00000102213	10090.ENSMUSP00000058919	0	0	0	0	0.949	0.889	1	0.9	1	0.556	1	0.999
Vps29	Vps26a	5034177	5029211	10090.ENSMUSP00000121020	10090.ENSMUSP00000090130	0	0	0	0	0.112	0.863	1	0.9	1	0.965	1	0.999
Psmb10	Psmb1	5020832	5016329	10090.ENSMUSP00000034369	10090.ENSMUSP00000014913	0	0	0.235	0	0.754	0.957	1	0.9	1	0.721	1	0.999
Psma2	Psma1	5035328	5020413	10090.ENSMUSP00000129767	10090.ENSMUSP00000033008	0	0	0.304	0.819	0.906	0.978	1	0.9	1	0.814	1	0.999
Rps8	Rps9	5031065	5015940	10090.ENSMUSP00000099757	10090.ENSMUSP00000006496	0	0	0	0	0.936	0.971	1	0.9	1	0.695	1	0.999
Rps24	Rps15	5034648	5026344	10090.ENSMUSP00000125977	10090.ENSMUSP00000069004	0	0	0	0	0.86	0.958	1	0.72	1	0.822	1	0.999
Rpl38	Rpl8	5031605	5015714	10090.ENSMUSP00000102213	10090.ENSMUSP00000004072	0	0	0	0	0.879	0.896	1	0.9	1	0.36	1	0.999
Psmb3	Psma5	5030905	5028998	10090.ENSMUSP00000099436	10090.ENSMUSP00000088057	0	0	0	0	0.731	0.943	1	0.9	1	0.74	1	0.999
Rps8	Rps21	5031065	5024953	10090.ENSMUSP00000099757	10090.ENSMUSP00000058432	0	0	0	0	0.961	0.888	1	0.9	1	0.41	1	0.999
Rps24	Rps23	5034648	5024346	10090.ENSMUSP00000125977	10090.ENSMUSP00000054490	0	0	0	0	0.892	0.97	1	0.72	1	0.688	1	0.999
Rpl35a	Rps3	5033146	5020408	10090.ENSMUSP00000110731	10090.ENSMUSP00000032998	0	0	0	0	0.981	0.97	1	0.9	1	0.466	1	0.999
Rps28	Rps11	5033019	5015656	10090.ENSMUSP00000110013	10090.ENSMUSP00000003521	0	0	0	0	0.93	0.958	1	0.9	1	0.652	1	0.999
Rps15a	Rpl32	5034103	5028158	10090.ENSMUSP00000119975	10090.ENSMUSP00000080523	0.172	0	0	0	0.908	0.971	1	0.9	1	0.419	1	0.999
Rps28	Rps29	5033019	5021660	10090.ENSMUSP00000110013	10090.ENSMUSP00000038352	0	0	0	0	0.946	0.958	1	0.72	1	0.703	1	0.999
Rpl10a	Rps3a1	5023403	5019462	10090.ENSMUSP00000048469	10090.ENSMUSP00000029722	0	0	0	0	0.944	0.889	1	0.9	1	0.483	1	0.999
Rpl32	Rpl26	5028158	5026969	10090.ENSMUSP00000080523	10090.ENSMUSP00000073175	0.164	0	0	0	0.952	0.971	1	0.9	1	0.185	1	0.999
Rps16	Rps23	5031918	5024346	10090.ENSMUSP00000103940	10090.ENSMUSP00000054490	0.139	0	0	0	0.93	0.971	1	0.72	1	0.762	1	0.999
Rps13	Rps3a1	5034698	5019462	10090.ENSMUSP00000126294	10090.ENSMUSP00000029722	0.172	0	0	0	0.913	0.971	1	0.9	1	0.766	1	0.999
Vps29	Vps35	5034177	5020747	10090.ENSMUSP00000121020	10090.ENSMUSP00000034131	0	0	0	0	0.131	0.906	1	0.9	1	0.971	1	0.999
Rpl37a	Rps23	5025033	5024346	10090.ENSMUSP00000058919	10090.ENSMUSP00000054490	0	0	0	0	0.961	0.97	1	0.9	1	0.083	1	0.999
Rps25	Rps5	5027947	5015759	10090.ENSMUSP00000079180	10090.ENSMUSP00000004554	0	0	0	0	0.96	0.971	1	0.9	1	0.757	1	0.999
Rps17	Rps14	5028013	5018277	10090.ENSMUSP00000079628	10090.ENSMUSP00000025511	0	0	0	0	0.909	0.971	1	0.72	1	0.879	1	0.999
Rps24	Rps20	5034648	5034139	10090.ENSMUSP00000125977	10090.ENSMUSP00000120528	0	0	0	0	0.91	0.97	1	0.72	1	0.787	1	0.999
Rpl19	Rps9	5016512	5015940	10090.ENSMUSP00000017548	10090.ENSMUSP00000006496	0	0	0	0	0.91	0.972	1	0.9	1	0.595	1	0.999
Rpl14	Rps3a1	5035620	5019462	10090.ENSMUSP00000131489	10090.ENSMUSP00000029722	0	0	0	0	0.915	0.86	1	0.9	1	0.687	1	0.999
Rpl14	Rps14	5035620	5018277	10090.ENSMUSP00000131489	10090.ENSMUSP00000025511	0.107	0	0	0	0.881	0.869	1	0.9	1	0.68	1	0.999
Rps21	Rps11	5024953	5015656	10090.ENSMUSP00000058432	10090.ENSMUSP00000003521	0	0	0	0	0.965	0.896	1	0.9	1	0.597	1	0.999
Psmb9	Psma6	5035932	5017199	10090.ENSMUSP00000133499	10090.ENSMUSP00000021412	0	0	0	0	0.751	0.959	1	0.9	1	0.551	1	0.999
Psmb7	Psmb1	5018980	5016329	10090.ENSMUSP00000028083	10090.ENSMUSP00000014913	0	0	0.28	0	0.791	0.96	1	0.9	1	0.7	1	0.999
Psma7	Psmb6	5019262	5016580	10090.ENSMUSP00000029082	10090.ENSMUSP00000018430	0	0	0	0	0.795	0.952	1	0.9	1	0.585	1	0.999
Rpl35a	Rpl5	5033146	5028222	10090.ENSMUSP00000110731	10090.ENSMUSP00000080854	0	0	0	0	0.916	0.834	1	0.72	1	0.883	1	0.999
Rpl39	Rpl8	5033187	5015714	10090.ENSMUSP00000110886	10090.ENSMUSP00000004072	0.057	0	0	0	0.835	0.971	1	0.72	1	0.506	1	0.999
Rpl7	Rpl4	5026693	5021039	10090.ENSMUSP00000071616	10090.ENSMUSP00000034966	0.098	0	0	0	0.935	0.818	1	0.72	1	0.788	1	0.999
Rps17	Rpl37a	5028013	5025033	10090.ENSMUSP00000079628	10090.ENSMUSP00000058919	0	0	0.249	0	0.935	0.97	1	0	0	0.553	1	0.999
Rps15	Rps11	5026344	5015656	10090.ENSMUSP00000069004	10090.ENSMUSP00000003521	0.172	0	0	0	0.873	0.958	1	0.72	1	0.629	1	0.999
Rps13	Rps25	5034698	5027947	10090.ENSMUSP00000126294	10090.ENSMUSP00000079180	0	0	0	0	0.999	0.971	1	0.9	1	0.747	1	0.999
Rpl14	Rps8	5035620	5031065	10090.ENSMUSP00000131489	10090.ENSMUSP00000099757	0	0	0	0	0.922	0.85	1	0.9	1	0.768	1	0.999
Rps10	Rps5	5033114	5015759	10090.ENSMUSP00000110532	10090.ENSMUSP00000004554	0	0	0	0	0.929	0.958	1	0.72	1	0.665	1	0.999
Rpl30	Rpl7	5032315	5026693	10090.ENSMUSP00000106014	10090.ENSMUSP00000071616	0	0	0	0	0.936	0.962	1	0.72	1	0.664	1	0.999
Rps16	Rps9	5031918	5015940	10090.ENSMUSP00000103940	10090.ENSMUSP00000006496	0.139	0	0	0	0.922	0.971	1	0.72	1	0.461	1	0.999
Rpl30	Rps17	5032315	5028013	10090.ENSMUSP00000106014	10090.ENSMUSP00000079628	0	0	0	0	0.899	0.971	1	0	0	0.733	1	0.999
Rpl39	Rpl37	5033187	5023036	10090.ENSMUSP00000110886	10090.ENSMUSP00000046506	0	0	0	0	0.826	0.971	1	0.72	1	0.543	1	0.999
Rpl36	Rps11	5027972	5015656	10090.ENSMUSP00000079340	10090.ENSMUSP00000003521	0	0	0	0	0.896	0.95	1	0.9	1	0.607	1	0.999
Rpl14	Rpl30	5035620	5032315	10090.ENSMUSP00000131489	10090.ENSMUSP00000106014	0	0	0	0	0.918	0.854	1	0.9	1	0.472	1	0.999
Psma2	Psmb4	5035328	5015885	10090.ENSMUSP00000129767	10090.ENSMUSP00000005923	0	0	0	0	0.933	0.961	1	0.9	1	0.739	1	0.999
Rps16	Rps5	5031918	5015759	10090.ENSMUSP00000103940	10090.ENSMUSP00000004554	0.139	0	0	0	0.999	0.971	1	0.72	1	0.707	1	0.999
Vamp2	Stx1a	5017153	5015843	10090.ENSMUSP00000021273	10090.ENSMUSP00000005509	0	0	0	0	0.133	0.908	1	0.9	1	0.91	1	0.999
Rpl14	Rps13	5035620	5034698	10090.ENSMUSP00000131489	10090.ENSMUSP00000126294	0	0	0	0	0.905	0.859	1	0.9	1	0.658	1	0.999
Rpl32	Rps3a1	5028158	5019462	10090.ENSMUSP00000080523	10090.ENSMUSP00000029722	0	0	0	0	0.909	0.971	1	0.9	1	0.427	1	0.999
Rps10	Rps25	5033114	5027947	10090.ENSMUSP00000110532	10090.ENSMUSP00000079180	0	0	0	0	0.862	0.958	1	0.72	1	0.675	1	0.999
Rpl30	Rps3a1	5032315	5019462	10090.ENSMUSP00000106014	10090.ENSMUSP00000029722	0	0	0	0	0.941	0.971	1	0.9	1	0.733	1	0.999
Rpl10a	Rpl19	5023403	5016512	10090.ENSMUSP00000048469	10090.ENSMUSP00000017548	0	0	0	0	0.97	0.971	1	0.9	1	0.63	1	0.999
Rps20	Rps11	5034139	5015656	10090.ENSMUSP00000120528	10090.ENSMUSP00000003521	0.172	0	0	0	0.999	0.972	1	0.72	1	0.718	1	0.999
Rps26	Rpl8	5018537	5015714	10090.ENSMUSP00000026420	10090.ENSMUSP00000004072	0	0	0	0	0.933	0.958	1	0.72	1	0.562	1	0.999
Rps15a	Rps18	5034103	5016094	10090.ENSMUSP00000119975	10090.ENSMUSP00000008812	0.17	0	0	0	0.814	0.95	1	0.9	1	0.422	1	0.999
Psmc2	Psmb4	5019763	5015885	10090.ENSMUSP00000030769	10090.ENSMUSP00000005923	0	0	0	0	0.823	0.82	1	0.9	1	0.788	1	0.999
Rpl23	Rps11	5030904	5015656	10090.ENSMUSP00000099435	10090.ENSMUSP00000003521	0.193	0	0	0	0.999	0.971	1	0.9	1	0.432	1	0.999
Rpl14	Rpl35a	5035620	5033146	10090.ENSMUSP00000131489	10090.ENSMUSP00000110731	0	0	0	0	0.917	0.82	1	0.9	1	0.757	1	0.999
Rps5	Rps11	5015759	5015656	10090.ENSMUSP00000004554	10090.ENSMUSP00000003521	0.172	0	0	0	0.999	0.972	1	0.9	1	0.681	1	0.999
Rps27a	Rpl23	5031143	5030904	10090.ENSMUSP00000099909	10090.ENSMUSP00000099435	0	0	0	0	0.911	0.896	1	0.9	1	0.362	1	0.999
Psma7	Psmb1	5019262	5016329	10090.ENSMUSP00000029082	10090.ENSMUSP00000014913	0	0	0.264	0	0.814	0.951	1	0.9	1	0.744	1	0.999
Rps17	Rpl19	5028013	5016512	10090.ENSMUSP00000079628	10090.ENSMUSP00000017548	0	0	0	0	0.948	0.972	1	0	0	0.695	1	0.999
Rps27a	Rpl19	5031143	5016512	10090.ENSMUSP00000099909	10090.ENSMUSP00000017548	0	0	0	0	0.937	0.896	1	0.9	1	0.321	1	0.999
Rps23	Rps29	5024346	5021660	10090.ENSMUSP00000054490	10090.ENSMUSP00000038352	0.139	0	0	0	0.863	0.971	1	0.72	1	0.477	1	0.999
Rpl35a	Rps25	5033146	5027947	10090.ENSMUSP00000110731	10090.ENSMUSP00000079180	0	0	0	0	0.999	0.971	1	0.9	1	0.379	1	0.999
Rpsa	Rps3a1	5021080	5019462	10090.ENSMUSP00000035105	10090.ENSMUSP00000029722	0.166	0	0	0	0.822	0.958	1	0.72	1	0.634	1	0.999
Rps28	Rps9	5033019	5015940	10090.ENSMUSP00000110013	10090.ENSMUSP00000006496	0	0	0	0	0.862	0.958	1	0.9	1	0.51	1	0.999
Rpl35a	Rplp2	5033146	5028293	10090.ENSMUSP00000110731	10090.ENSMUSP00000081474	0	0	0	0	0.916	0.866	1	0.9	1	0.559	1	0.999
Psmb5	Psmb6	5017622	5016580	10090.ENSMUSP00000022803	10090.ENSMUSP00000018430	0	0	0.297	0.744	0.836	0.96	1	0.9	1	0.853	1	0.999
Rps15a	Rpl22	5034103	5034020	10090.ENSMUSP00000119975	10090.ENSMUSP00000118787	0	0	0	0	0.913	0.971	1	0.9	1	0.291	1	0.999
Rpl31	Rpl5	5036727	5028222	10090.ENSMUSP00000137631	10090.ENSMUSP00000080854	0	0	0	0	0.912	0.818	1	0.72	1	0.84	1	0.999
Rpl14	Rps25	5035620	5027947	10090.ENSMUSP00000131489	10090.ENSMUSP00000079180	0	0	0	0	0.886	0.873	1	0.9	1	0.629	1	0.999
Rpl14	Rpl3	5035620	5028126	10090.ENSMUSP00000131489	10090.ENSMUSP00000080354	0.088	0	0	0	0.883	0.818	1	0.9	1	0.695	1	0.999
Rps6	Rpl3	5031125	5028126	10090.ENSMUSP00000099878	10090.ENSMUSP00000080354	0	0	0	0	0.999	0.851	1	0.9	1	0.595	1	0.999
Rps10	Rps14	5033114	5018277	10090.ENSMUSP00000110532	10090.ENSMUSP00000025511	0	0	0	0	0.858	0.958	1	0.72	1	0.79	1	0.999
Rps28	Rps18	5033019	5016094	10090.ENSMUSP00000110013	10090.ENSMUSP00000008812	0	0	0	0	0.762	0.939	1	0.9	1	0.493	1	0.999
Psmb9	Psma3	5035932	5034579	10090.ENSMUSP00000133499	10090.ENSMUSP00000125548	0	0	0	0	0.769	0.959	1	0.9	1	0.706	1	0.999
Psmc3	Psmb1	5026606	5016329	10090.ENSMUSP00000071054	10090.ENSMUSP00000014913	0.06	0	0	0	0.823	0.82	1	0.9	1	0.737	1	0.999
Rps13	Rpl32	5034698	5028158	10090.ENSMUSP00000126294	10090.ENSMUSP00000080523	0	0	0	0	0.875	0.971	1	0.9	1	0.311	1	0.999
Atp5f1	Atp5j	5033489	5017869	10090.ENSMUSP00000113022	10090.ENSMUSP00000023608	0	0	0	0	0.877	0.859	1	0.9	1	0.717	1	0.999
Rpl26	Rpl10a	5026969	5023403	10090.ENSMUSP00000073175	10090.ENSMUSP00000048469	0.164	0	0	0	0.959	0.97	1	0.9	1	0.616	1	0.999
Rpl36	Rpl26	5027972	5026969	10090.ENSMUSP00000079340	10090.ENSMUSP00000073175	0	0	0	0	0.916	0.95	1	0.9	1	0.58	1	0.999
Psma2	Psmb7	5035328	5018980	10090.ENSMUSP00000129767	10090.ENSMUSP00000028083	0	0	0	0	0.785	0.96	1	0.9	1	0.657	1	0.999
Rpl10a	Rps18	5023403	5016094	10090.ENSMUSP00000048469	10090.ENSMUSP00000008812	0.139	0	0	0	0.814	0.95	1	0.9	1	0.204	1	0.999
Rps6	Rps9	5031125	5015940	10090.ENSMUSP00000099878	10090.ENSMUSP00000006496	0	0	0	0	0.884	0.971	1	0.9	1	0.683	1	0.999
Rps26	Rps5	5018537	5015759	10090.ENSMUSP00000026420	10090.ENSMUSP00000004554	0	0	0	0	0.938	0.958	1	0.72	1	0.517	1	0.999
Rps29	Rps3	5021660	5020408	10090.ENSMUSP00000038352	10090.ENSMUSP00000032998	0.17	0	0	0	0.818	0.971	1	0.72	1	0.413	1	0.999
Psmc2	Psmb2	5019763	5019726	10090.ENSMUSP00000030769	10090.ENSMUSP00000030642	0	0	0	0	0.862	0.859	1	0.9	1	0.725	1	0.999
Rps25	Rps14	5027947	5018277	10090.ENSMUSP00000079180	10090.ENSMUSP00000025511	0	0	0	0	0.999	0.97	1	0.9	1	0.848	1	0.999
Rpl6	Rpl8	5020043	5015714	10090.ENSMUSP00000031617	10090.ENSMUSP00000004072	0.107	0	0	0	0.951	0.799	1	0.9	1	0.714	1	0.999
Rpl30	Rpl4	5032315	5021039	10090.ENSMUSP00000106014	10090.ENSMUSP00000034966	0.17	0	0	0	0.911	0.82	1	0.9	1	0.724	1	0.999
Rps13	Rps15a	5034698	5034103	10090.ENSMUSP00000126294	10090.ENSMUSP00000119975	0	0	0	0	0.944	0.972	1	0.9	1	0.464	1	0.999
Rpl37a	Rps5	5025033	5015759	10090.ENSMUSP00000058919	10090.ENSMUSP00000004554	0	0	0	0	0.964	0.97	1	0.9	1	0.393	1	0.999
Rps16	Rps21	5031918	5024953	10090.ENSMUSP00000103940	10090.ENSMUSP00000058432	0	0	0	0	0.941	0.896	1	0.72	1	0.619	1	0.999
Rps17	Rps3	5028013	5020408	10090.ENSMUSP00000079628	10090.ENSMUSP00000032998	0	0	0	0	0.91	0.972	1	0.72	1	0.724	1	0.999
Rpl19	Rpl13	5016512	5015324	10090.ENSMUSP00000017548	10090.ENSMUSP00000000756	0	0	0	0	0.948	0.788	1	0.9	1	0.452	1	0.999
Rps15a	Rpl30	5034103	5032315	10090.ENSMUSP00000119975	10090.ENSMUSP00000106014	0	0	0	0	0.939	0.971	1	0.9	1	0.527	1	0.999
Rpl30	Rpl32	5032315	5028158	10090.ENSMUSP00000106014	10090.ENSMUSP00000080523	0	0	0	0	0.908	0.971	1	0.9	1	0.741	1	0.999
Rps21	Rpl10a	5024953	5023403	10090.ENSMUSP00000058432	10090.ENSMUSP00000048469	0	0	0	0	0.957	0.884	1	0.9	1	0.461	1	0.999
Rps27a	Rps11	5031143	5015656	10090.ENSMUSP00000099909	10090.ENSMUSP00000003521	0	0	0	0	0.938	0.896	1	0.9	1	0.052	1	0.999
Rpl8	Rps11	5015714	5015656	10090.ENSMUSP00000004072	10090.ENSMUSP00000003521	0.172	0	0	0	0.999	0.972	1	0.9	1	0.699	1	0.999
Rps28	Rps8	5033019	5031065	10090.ENSMUSP00000110013	10090.ENSMUSP00000099757	0	0	0	0	0.924	0.958	1	0.9	1	0.703	1	0.999
Rps3	Rps18	5020408	5016094	10090.ENSMUSP00000032998	10090.ENSMUSP00000008812	0.17	0	0	0	0.803	0.95	1	0.9	1	0.622	1	0.999
Rpl18	Rpl10a	5031793	5023403	10090.ENSMUSP00000103365	10090.ENSMUSP00000048469	0	0	0	0	0.936	0.881	1	0.9	1	0.455	1	0.999
Rpl30	Rpl37a	5032315	5025033	10090.ENSMUSP00000106014	10090.ENSMUSP00000058919	0	0	0.335	0	0.999	0.97	1	0.9	1	0.496	1	0.999
Rps3a1	Rps11	5019462	5015656	10090.ENSMUSP00000029722	10090.ENSMUSP00000003521	0	0	0	0	0.999	0.971	1	0.9	1	0.721	1	0.999
Rps6	Rps14	5031125	5018277	10090.ENSMUSP00000099878	10090.ENSMUSP00000025511	0	0	0	0	0.929	0.97	1	0.9	1	0.811	1	0.999
Rps10	Rps26	5033114	5018537	10090.ENSMUSP00000110532	10090.ENSMUSP00000026420	0	0	0	0	0.855	0.945	1	0.72	1	0.854	1	0.999
Psmb7	Psmb6	5018980	5016580	10090.ENSMUSP00000028083	10090.ENSMUSP00000018430	0	0	0.233	0.754	0.815	0.96	1	0.9	1	0.835	1	0.999
Rpl19	Rps18	5016512	5016094	10090.ENSMUSP00000017548	10090.ENSMUSP00000008812	0	0	0	0	0.839	0.95	1	0.9	1	0.441	1	0.999
Rpl30	Rps21	5032315	5024953	10090.ENSMUSP00000106014	10090.ENSMUSP00000058432	0	0	0	0	0.937	0.896	1	0.9	1	0.578	1	0.999
Rplp2	Rps11	5028293	5015656	10090.ENSMUSP00000081474	10090.ENSMUSP00000003521	0	0	0	0	0.917	0.869	1	0.9	1	0.338	1	0.999
Rps23	Rpl10a	5024346	5023403	10090.ENSMUSP00000054490	10090.ENSMUSP00000048469	0.164	0	0	0	0.94	0.971	1	0.9	1	0.335	1	0.999
Psmb3	Psma1	5030905	5020413	10090.ENSMUSP00000099436	10090.ENSMUSP00000033008	0	0	0	0	0.785	0.96	1	0.9	1	0.646	1	0.999
Rps24	Rpl26	5034648	5026969	10090.ENSMUSP00000125977	10090.ENSMUSP00000073175	0	0	0	0	0.986	0.97	1	0	0	0.87	1	0.999
Rps16	Rps3	5031918	5020408	10090.ENSMUSP00000103940	10090.ENSMUSP00000032998	0.17	0	0	0	0.999	0.971	1	0.72	1	0.804	1	0.999
Rplp2	Rpl37a	5028293	5025033	10090.ENSMUSP00000081474	10090.ENSMUSP00000058919	0	0	0	0	0.958	0.858	1	0.9	1	0.423	1	0.999
Rps11	Rpl13	5015656	5015324	10090.ENSMUSP00000003521	10090.ENSMUSP00000000756	0	0	0	0	0.938	0.8	1	0.9	1	0.467	1	0.999
Rps10	Rps26-ps1	5033114	5027499	10090.ENSMUSP00000110532	10090.ENSMUSP00000076447	0	0	0	0	0.633	0.945	1	0.72	1	0.854	1	0.999
Rps10	Rps15	5033114	5026344	10090.ENSMUSP00000110532	10090.ENSMUSP00000069004	0	0	0	0	0.814	0.945	1	0.72	1	0.777	1	0.999
Rpl31	Rpl26	5036727	5026969	10090.ENSMUSP00000137631	10090.ENSMUSP00000073175	0	0	0	0	0.999	0.971	1	0.72	1	0.828	1	0.999
Rps17	Rps25	5028013	5027947	10090.ENSMUSP00000079628	10090.ENSMUSP00000079180	0	0	0	0	0.938	0.971	1	0.72	1	0.73	1	0.999
Rps6	Rps3	5031125	5020408	10090.ENSMUSP00000099878	10090.ENSMUSP00000032998	0	0	0	0	0.929	0.97	1	0.9	1	0.745	1	0.999
Rpl5	Rps11	5028222	5015656	10090.ENSMUSP00000080854	10090.ENSMUSP00000003521	0.193	0	0	0	0.999	0.865	1	0	0	0.632	1	0.999
Rps8	Rpl13	5031065	5015324	10090.ENSMUSP00000099757	10090.ENSMUSP00000000756	0	0	0	0	0.947	0.799	1	0.9	1	0.464	1	0.999
Psmb2	Psma7	5019726	5019262	10090.ENSMUSP00000030642	10090.ENSMUSP00000029082	0	0	0	0	0.813	0.95	1	0.9	1	0.729	1	0.999
Rps24	Rps8	5034648	5031065	10090.ENSMUSP00000125977	10090.ENSMUSP00000099757	0	0	0	0	0.937	0.97	1	0.72	1	0.854	1	0.999
Rpl39	Rps25	5033187	5027947	10090.ENSMUSP00000110886	10090.ENSMUSP00000079180	0	0	0	0	0.909	0.971	1	0	0	0.665	1	0.999
Rps26-ps1	Rps5	5027499	5015759	10090.ENSMUSP00000076447	10090.ENSMUSP00000004554	0	0	0	0	0.777	0.958	1	0.72	1	0.517	1	0.998
Rps26-ps1	Rps29	5027499	5021660	10090.ENSMUSP00000076447	10090.ENSMUSP00000038352	0	0	0	0	0.673	0.956	1	0.72	1	0.713	1	0.998
Atp5k	Atp5o	5023828	5017883	10090.ENSMUSP00000051222	10090.ENSMUSP00000023677	0	0	0	0	0.863	0.795	1	0.9	1	0.58	1	0.998
Rpl39	Rps26	5033187	5018537	10090.ENSMUSP00000110886	10090.ENSMUSP00000026420	0.105	0	0	0	0.843	0.958	1	0.72	1	0.371	1	0.998
Rpl22	Rpl6	5034020	5020043	10090.ENSMUSP00000118787	10090.ENSMUSP00000031617	0	0	0	0	0.8	0.792	1	0.9	1	0.686	1	0.998
Atp5j2	Atp5e	5034574	5016447	10090.ENSMUSP00000125504	10090.ENSMUSP00000016396	0	0	0	0	0.937	0.657	1	0.9	1	0.466	1	0.998
Rpl14	Rpl32	5035620	5028158	10090.ENSMUSP00000131489	10090.ENSMUSP00000080523	0.097	0	0	0	0.885	0.839	1	0.9	1	0.321	1	0.998
Rps23	Rpl13	5024346	5015324	10090.ENSMUSP00000054490	10090.ENSMUSP00000000756	0	0	0	0	0.933	0.801	1	0.9	1	0.173	1	0.998
Rps6	Rps29	5031125	5021660	10090.ENSMUSP00000099878	10090.ENSMUSP00000038352	0	0	0	0	0.831	0.96	1	0.72	1	0.498	1	0.998
Uqcr10	Uqcrc2	5024399	5020466	10090.ENSMUSP00000054856	10090.ENSMUSP00000033176	0	0	0	0	0.544	0.808	1	0.9	1	0.824	1	0.998
Psma5	Psmb10	5028998	5020832	10090.ENSMUSP00000088057	10090.ENSMUSP00000034369	0	0	0.331	0.64	0.641	0.93	1	0.9	1	0.635	1	0.998
Rpl38	Rps26	5031605	5018537	10090.ENSMUSP00000102213	10090.ENSMUSP00000026420	0	0	0	0	0.943	0.801	1	0.72	1	0.502	1	0.998
Rps15a	Rpl6	5034103	5020043	10090.ENSMUSP00000119975	10090.ENSMUSP00000031617	0.153	0	0	0	0.832	0.794	1	0.9	1	0.665	1	0.998
Rpl30	Rplp2	5032315	5028293	10090.ENSMUSP00000106014	10090.ENSMUSP00000081474	0	0	0	0	0.921	0.842	1	0.9	1	0.195	1	0.998
Psma3	Psmd8	5034579	5023901	10090.ENSMUSP00000125548	10090.ENSMUSP00000051657	0	0	0	0	0.795	0.857	1	0.9	1	0.513	1	0.998
Atp5j2	Atp5d	5034574	5031383	10090.ENSMUSP00000125504	10090.ENSMUSP00000101006	0	0	0	0	0.85	0.805	1	0.9	1	0.601	1	0.998
Psmd8	Psma6	5023901	5017199	10090.ENSMUSP00000051657	10090.ENSMUSP00000021412	0	0	0	0	0.786	0.88	1	0.9	1	0.588	1	0.998
Uqcrc2	Cox5a	5020466	5015244	10090.ENSMUSP00000033176	10090.ENSMUSP00000000090	0	0	0	0	0.86	0.708	1	0.9	1	0.751	1	0.998
Rps23	Rpl6	5024346	5020043	10090.ENSMUSP00000054490	10090.ENSMUSP00000031617	0.088	0	0	0	0.862	0.799	1	0.9	1	0.571	1	0.998
Rps28	Rps15	5033019	5026344	10090.ENSMUSP00000110013	10090.ENSMUSP00000069004	0.043	0	0	0	0.794	0.945	1	0.72	1	0.56	1	0.998
Rpl35a	Rpl36	5033146	5027972	10090.ENSMUSP00000110731	10090.ENSMUSP00000079340	0	0	0	0	0.794	0.766	1	0.9	1	0.729	1	0.998
Psmb9	Psmb3	5035932	5030905	10090.ENSMUSP00000133499	10090.ENSMUSP00000099436	0	0	0.243	0.669	0.663	0.94	1	0.9	1	0.526	1	0.998
Rplp2	Rps9	5028293	5015940	10090.ENSMUSP00000081474	10090.ENSMUSP00000006496	0	0	0	0	0.878	0.856	1	0.9	1	0.297	1	0.998
Rpsa	Rps5	5021080	5015759	10090.ENSMUSP00000035105	10090.ENSMUSP00000004554	0.122	0	0	0	0.818	0.958	1	0.72	1	0.513	1	0.998
Rps25	Rpsa	5027947	5021080	10090.ENSMUSP00000079180	10090.ENSMUSP00000035105	0	0	0	0	0.815	0.958	1	0.72	1	0.558	1	0.998
Rpl10a	Rpl6	5023403	5020043	10090.ENSMUSP00000048469	10090.ENSMUSP00000031617	0	0	0	0	0.916	0.79	1	0.9	1	0.43	1	0.998
Rpl38	Rpl3	5031605	5028126	10090.ENSMUSP00000102213	10090.ENSMUSP00000080354	0	0	0	0	0.811	0.856	1	0.9	1	0.623	1	0.998
Rps17	Rps18	5028013	5016094	10090.ENSMUSP00000079628	10090.ENSMUSP00000008812	0	0	0	0	0.826	0.95	1	0.72	1	0.539	1	0.998
Rps6	Rpsa	5031125	5021080	10090.ENSMUSP00000099878	10090.ENSMUSP00000035105	0	0	0	0	0.822	0.958	1	0.72	1	0.412	1	0.998
Rpl35a	Rps29	5033146	5021660	10090.ENSMUSP00000110731	10090.ENSMUSP00000038352	0	0	0	0	0.863	0.96	1	0	0	0.766	1	0.998
Psmd8	Psmb4	5023901	5015885	10090.ENSMUSP00000051657	10090.ENSMUSP00000005923	0	0	0	0	0.814	0.844	1	0.9	1	0.674	1	0.998
Psmd8	Psmb6	5023901	5016580	10090.ENSMUSP00000051657	10090.ENSMUSP00000018430	0	0	0	0	0.801	0.853	1	0.9	1	0.43	1	0.998
Rpl23	Rpl4	5030904	5021039	10090.ENSMUSP00000099435	10090.ENSMUSP00000034966	0.17	0	0	0	0.91	0.84	1	0.9	1	0.274	1	0.998
Atp5d	Atp5k	5031383	5023828	10090.ENSMUSP00000101006	10090.ENSMUSP00000051222	0	0	0	0	0.836	0.795	1	0.9	1	0.631	1	0.998
H3f3a	H2afz	5034438	5021406	10090.ENSMUSP00000124509	10090.ENSMUSP00000036907	0	0.001	0	0	0.21	0.964	1	0.9	1	0.597	1	0.998
Rps10	Rps19	5033114	5031943	10090.ENSMUSP00000110532	10090.ENSMUSP00000104067	0	0	0	0	0.869	0.801	1	0.54	1	0.856	1	0.998
Rps13	Rps26-ps1	5034698	5027499	10090.ENSMUSP00000126294	10090.ENSMUSP00000076447	0	0	0	0	0.778	0.958	1	0.72	1	0.344	1	0.998
Rps24	Rpl32	5034648	5028158	10090.ENSMUSP00000125977	10090.ENSMUSP00000080523	0	0	0	0	0.921	0.97	1	0	0	0.39	1	0.998
Uqcrq	Cox6c	5024138	5016303	10090.ENSMUSP00000053145	10090.ENSMUSP00000014457	0	0	0	0	0.915	0.725	1	0.9	1	0.438	1	0.998
Vps29	Vps26b	5034177	5020872	10090.ENSMUSP00000121020	10090.ENSMUSP00000034470	0	0	0	0	0.085	0.863	1	0.9	1	0.886	1	0.998
Atp5j2	Atp5o	5034574	5017883	10090.ENSMUSP00000125504	10090.ENSMUSP00000023677	0	0	0	0	0.911	0.802	1	0.9	1	0.494	1	0.998
Rpl38	Rps9	5031605	5015940	10090.ENSMUSP00000102213	10090.ENSMUSP00000006496	0	0	0	0	0.881	0.896	1	0.9	1	0.23	1	0.998
Rps20	Rpl37	5034139	5023036	10090.ENSMUSP00000120528	10090.ENSMUSP00000046506	0	0	0	0	0.828	0.972	1	0	0	0.675	1	0.998
Rps20	Rpl22	5034139	5034020	10090.ENSMUSP00000120528	10090.ENSMUSP00000118787	0	0	0	0	0.836	0.971	1	0	0	0.614	1	0.998
Rps21	Rpl37	5024953	5023036	10090.ENSMUSP00000058432	10090.ENSMUSP00000046506	0	0	0	0	0.847	0.894	1	0.9	1	0.059	1	0.998
Rps21	Rpl4	5024953	5021039	10090.ENSMUSP00000058432	10090.ENSMUSP00000034966	0	0	0	0	0.862	0.821	1	0.9	1	0.407	1	0.998
Rpl34	Rpl10a	5028844	5023403	10090.ENSMUSP00000086614	10090.ENSMUSP00000048469	0	0	0	0	0.91	0.801	1	0.9	1	0.447	1	0.998
Rpl34	Rps11	5028844	5015656	10090.ENSMUSP00000086614	10090.ENSMUSP00000003521	0.172	0	0	0	0.932	0.801	1	0.9	1	0.212	1	0.998
Rps19	Rps26	5031943	5018537	10090.ENSMUSP00000104067	10090.ENSMUSP00000026420	0	0	0	0	0.912	0.801	1	0.54	1	0.831	1	0.998
Rps6	Rpl6	5031125	5020043	10090.ENSMUSP00000099878	10090.ENSMUSP00000031617	0	0	0	0	0.867	0.796	1	0.9	1	0.622	1	0.998
Rps14	Rpl13	5018277	5015324	10090.ENSMUSP00000025511	10090.ENSMUSP00000000756	0	0	0	0	0.871	0.801	1	0.9	1	0.485	1	0.998
Rpl7	Rps23	5026693	5024346	10090.ENSMUSP00000071616	10090.ENSMUSP00000054490	0.119	0	0	0	0.91	0.961	1	0	0	0.629	1	0.998
Rpl37a	Rpl6	5025033	5020043	10090.ENSMUSP00000058919	10090.ENSMUSP00000031617	0	0	0	0	0.902	0.798	1	0.9	1	0.238	1	0.998
Psmc2	Psmb5	5019763	5017622	10090.ENSMUSP00000030769	10090.ENSMUSP00000022803	0	0	0	0	0.675	0.859	1	0.9	1	0.681	1	0.998
Rps8	Rpl5	5031065	5028222	10090.ENSMUSP00000099757	10090.ENSMUSP00000080854	0	0	0	0	0.939	0.849	1	0	0	0.853	1	0.998
Rplp2	Rps3a1	5028293	5019462	10090.ENSMUSP00000081474	10090.ENSMUSP00000029722	0	0	0	0	0.868	0.86	1	0.9	1	0.391	1	0.998
Rps13	Rpl6	5034698	5020043	10090.ENSMUSP00000126294	10090.ENSMUSP00000031617	0	0	0	0	0.81	0.799	1	0.9	1	0.63	1	0.998
Rpl38	Rpl6	5031605	5020043	10090.ENSMUSP00000102213	10090.ENSMUSP00000031617	0	0	0	0	0.861	0.799	1	0.9	1	0.49	1	0.998
Rplp2	Rpl37	5028293	5023036	10090.ENSMUSP00000081474	10090.ENSMUSP00000046506	0	0	0	0	0.826	0.879	1	0.9	1	0.398	1	0.998
Rpl30	Rpl5	5032315	5028222	10090.ENSMUSP00000106014	10090.ENSMUSP00000080854	0	0	0	0	0.892	0.868	1	0.72	1	0.762	1	0.998
Rps25	Rpl4	5027947	5021039	10090.ENSMUSP00000079180	10090.ENSMUSP00000034966	0	0	0	0	0.882	0.829	1	0.9	1	0.541	1	0.998
Rps26-ps1	Rpl19	5027499	5016512	10090.ENSMUSP00000076447	10090.ENSMUSP00000017548	0	0	0	0	0.777	0.958	1	0.72	1	0.473	1	0.998
Psmd8	Psmb2	5023901	5019726	10090.ENSMUSP00000051657	10090.ENSMUSP00000030642	0	0	0	0	0.799	0.846	1	0.9	1	0.599	1	0.998
Rpl34	Rpl8	5028844	5015714	10090.ENSMUSP00000086614	10090.ENSMUSP00000004072	0.161	0	0	0	0.905	0.801	1	0.9	1	0.319	1	0.998
Rplp2	Rpl6	5028293	5020043	10090.ENSMUSP00000081474	10090.ENSMUSP00000031617	0	0	0	0	0.824	0.785	1	0.9	1	0.558	1	0.998
Rpl39	Rps21	5033187	5024953	10090.ENSMUSP00000110886	10090.ENSMUSP00000058432	0	0	0	0	0.934	0.858	1	0.72	1	0.535	1	0.998
Rps13	Rpsa	5034698	5021080	10090.ENSMUSP00000126294	10090.ENSMUSP00000035105	0.139	0	0	0	0.8	0.958	1	0.72	1	0.36	1	0.998
Rpl31	Rpl14	5036727	5035620	10090.ENSMUSP00000137631	10090.ENSMUSP00000131489	0	0	0	0	0.915	0.821	1	0.72	1	0.694	1	0.998
Rpl39	Rps14	5033187	5018277	10090.ENSMUSP00000110886	10090.ENSMUSP00000025511	0.075	0	0	0	0.881	0.97	1	0	0	0.619	1	0.998
Rps29	Rps18	5021660	5016094	10090.ENSMUSP00000038352	10090.ENSMUSP00000008812	0.113	0	0	0	0.775	0.95	1	0.72	1	0.53	1	0.998
Rpl39	Rps9	5033187	5015940	10090.ENSMUSP00000110886	10090.ENSMUSP00000006496	0.092	0	0	0	0.852	0.971	1	0	0	0.556	1	0.998
Rpl32	Rps26	5028158	5018537	10090.ENSMUSP00000080523	10090.ENSMUSP00000026420	0	0	0	0	0.93	0.958	1	0.36	1	0.178	1	0.998
Rps15	Rpl19	5026344	5016512	10090.ENSMUSP00000069004	10090.ENSMUSP00000017548	0.172	0	0	0	0.914	0.958	1	0	0	0.531	1	0.998
Dld	Pdhx	5032391	5016207	10090.ENSMUSP00000106481	10090.ENSMUSP00000011058	0.077	0.001	0.389	0	0.548	0.809	1	0.9	1	0.82	1	0.998
Cox7c	Cox5b	5033801	5028064	10090.ENSMUSP00000115419	10090.ENSMUSP00000079944	0	0	0	0	0.823	0.659	1	0.9	1	0.791	1	0.998
Rps27a	Rpl4	5031143	5021039	10090.ENSMUSP00000099909	10090.ENSMUSP00000034966	0	0	0	0	0.881	0.819	1	0.9	1	0.215	1	0.998
Rpl35a	Rpl34	5033146	5028844	10090.ENSMUSP00000110731	10090.ENSMUSP00000086614	0	0	0	0	0.873	0.801	1	0.9	1	0.475	1	0.998
Rpl39	Rps11	5033187	5015656	10090.ENSMUSP00000110886	10090.ENSMUSP00000003521	0.056	0	0	0	0.912	0.971	1	0	0	0.327	1	0.998
Rps20	Rps19	5034139	5031943	10090.ENSMUSP00000120528	10090.ENSMUSP00000104067	0	0	0	0	0.848	0.889	1	0.54	1	0.857	1	0.998
Rpl32	Rpl4	5028158	5021039	10090.ENSMUSP00000080523	10090.ENSMUSP00000034966	0	0	0	0	0.887	0.839	1	0.9	1	0.507	1	0.998
Rps24	Rps5	5034648	5015759	10090.ENSMUSP00000125977	10090.ENSMUSP00000004554	0	0	0	0	0.885	0.889	1	0.72	1	0.585	1	0.998
Rps20	Rpsa	5034139	5021080	10090.ENSMUSP00000120528	10090.ENSMUSP00000035105	0.131	0	0	0	0.814	0.958	1	0.72	1	0.455	1	0.998
Rpl31	Rps6	5036727	5031125	10090.ENSMUSP00000137631	10090.ENSMUSP00000099878	0	0	0	0	0.881	0.97	1	0	0	0.638	1	0.998
Rpl36	Rps21	5027972	5024953	10090.ENSMUSP00000079340	10090.ENSMUSP00000058432	0	0	0	0	0.901	0.762	1	0.9	1	0.535	1	0.998
Rpl23	Rpl6	5030904	5020043	10090.ENSMUSP00000099435	10090.ENSMUSP00000031617	0.153	0	0	0	0.87	0.799	1	0.9	1	0.407	1	0.998
Rpl23	Rpl34	5030904	5028844	10090.ENSMUSP00000099435	10090.ENSMUSP00000086614	0.172	0	0	0	0.911	0.801	1	0.9	1	0.166	1	0.998
Rps24	Rpl30	5034648	5032315	10090.ENSMUSP00000125977	10090.ENSMUSP00000106014	0	0	0	0	0.877	0.969	1	0	0	0.712	1	0.998
Rpl34	Rps14	5028844	5018277	10090.ENSMUSP00000086614	10090.ENSMUSP00000025511	0	0	0	0	0.865	0.801	1	0.9	1	0.536	1	0.998
Rps26-ps1	Rpl8	5027499	5015714	10090.ENSMUSP00000076447	10090.ENSMUSP00000004072	0	0	0	0	0.777	0.958	1	0.72	1	0.562	1	0.998
Rps27a	Rps9	5031143	5015940	10090.ENSMUSP00000099909	10090.ENSMUSP00000006496	0	0	0	0	0.881	0.896	1	0.9	1	0.161	1	0.998
Rpsa	Rps9	5021080	5015940	10090.ENSMUSP00000035105	10090.ENSMUSP00000006496	0.139	0	0	0	0.826	0.958	1	0.72	1	0.439	1	0.998
Psmc3	Psma7	5026606	5019262	10090.ENSMUSP00000071054	10090.ENSMUSP00000029082	0.06	0	0.2	0	0.799	0.816	1	0.9	1	0.634	1	0.998
Rps26-ps1	Rpl26	5027499	5026969	10090.ENSMUSP00000076447	10090.ENSMUSP00000073175	0	0	0	0	0.777	0.958	1	0	0	0.822	1	0.998
Rpl14	Rpl10a	5035620	5023403	10090.ENSMUSP00000131489	10090.ENSMUSP00000048469	0	0	0	0	0.888	0.868	1	0.9	1	0.174	1	0.998
Rpl32	Rpl3	5028158	5028126	10090.ENSMUSP00000080523	10090.ENSMUSP00000080354	0.139	0	0	0	0.816	0.858	1	0.9	1	0.405	1	0.998
Rplp2	Rps3	5028293	5020408	10090.ENSMUSP00000081474	10090.ENSMUSP00000032998	0	0	0	0	0.876	0.806	1	0.9	1	0.554	1	0.998
Rpl10a	Rps29	5023403	5021660	10090.ENSMUSP00000048469	10090.ENSMUSP00000038352	0.139	0	0	0	0.861	0.961	1	0.72	1	0.343	1	0.998
Rpl14	Rpl5	5035620	5028222	10090.ENSMUSP00000131489	10090.ENSMUSP00000080854	0.153	0	0	0	0.912	0.809	1	0.72	1	0.712	1	0.998
Psma4	Psmb10	5020992	5020832	10090.ENSMUSP00000034848	10090.ENSMUSP00000034369	0	0	0.285	0.609	0.769	0.943	1	0.9	1	0.424	1	0.998
Rpl22	Rpl3	5034020	5028126	10090.ENSMUSP00000118787	10090.ENSMUSP00000080354	0	0	0	0	0.717	0.82	1	0.9	1	0.701	1	0.998
H3f3a	Cbx3	5034438	5020121	10090.ENSMUSP00000124509	10090.ENSMUSP00000031862	0	0	0	0	0.048	0.977	1	0.9	1	0.236	1	0.998
Rpl18	Rpl3	5031793	5028126	10090.ENSMUSP00000103365	10090.ENSMUSP00000080354	0	0	0	0	0.871	0.82	1	0.9	1	0.543	1	0.998
Rpl18	Rps15	5031793	5026344	10090.ENSMUSP00000103365	10090.ENSMUSP00000069004	0	0	0	0	0.91	0.956	1	0	0	0.594	1	0.998
Rps19	Rps18	5031943	5016094	10090.ENSMUSP00000104067	10090.ENSMUSP00000008812	0	0	0	0	0.834	0.768	1	0.9	1	0.625	1	0.998
Rpl34	Rpl32	5028844	5028158	10090.ENSMUSP00000086614	10090.ENSMUSP00000080523	0.164	0	0	0	0.907	0.801	1	0.9	1	0.366	1	0.998
Rpl23	Rplp2	5030904	5028293	10090.ENSMUSP00000099435	10090.ENSMUSP00000081474	0	0	0	0	0.901	0.883	1	0.9	1	0.172	1	0.998
Rpl32	Rps17	5028158	5028013	10090.ENSMUSP00000080523	10090.ENSMUSP00000079628	0	0	0	0	0.937	0.971	1	0	0	0.417	1	0.998
Rps20	Rpl23	5034139	5030904	10090.ENSMUSP00000120528	10090.ENSMUSP00000099435	0.172	0	0	0	0.908	0.971	1	0	0	0.537	1	0.998
Rps27a	Rps14	5031143	5018277	10090.ENSMUSP00000099909	10090.ENSMUSP00000025511	0	0	0	0	0.899	0.889	1	0.9	1	0.147	1	0.998
Rpl32	Rps29	5028158	5021660	10090.ENSMUSP00000080523	10090.ENSMUSP00000038352	0.139	0	0	0	0.906	0.962	1	0.36	1	0.276	1	0.998
Rps13	Rplp2	5034698	5028293	10090.ENSMUSP00000126294	10090.ENSMUSP00000081474	0	0	0	0	0.863	0.858	1	0.9	1	0.181	1	0.998
Rpl31	Rps16	5036727	5031918	10090.ENSMUSP00000137631	10090.ENSMUSP00000103940	0	0	0	0	0.916	0.97	1	0	0	0.512	1	0.998
Rpl22	Rpl4	5034020	5021039	10090.ENSMUSP00000118787	10090.ENSMUSP00000034966	0	0	0	0	0.834	0.817	1	0.9	1	0.623	1	0.998
Rplp2	Rps5	5028293	5015759	10090.ENSMUSP00000081474	10090.ENSMUSP00000004554	0	0	0	0	0.879	0.859	1	0.9	1	0.285	1	0.998
Rpl37a	Rpl13	5025033	5015324	10090.ENSMUSP00000058919	10090.ENSMUSP00000000756	0	0	0	0	0.926	0.8	1	0.9	1	0.25	1	0.998
Rpl31	Rps3	5036727	5020408	10090.ENSMUSP00000137631	10090.ENSMUSP00000032998	0	0	0	0	0.914	0.97	1	0	0	0.545	1	0.998
Rps15a	Rps10	5034103	5033114	10090.ENSMUSP00000119975	10090.ENSMUSP00000110532	0	0	0	0	0.803	0.958	1	0.72	1	0.6	1	0.998
Rps20	Rps18	5034139	5016094	10090.ENSMUSP00000120528	10090.ENSMUSP00000008812	0.139	0	0	0	0.776	0.95	1	0.72	1	0.486	1	0.998
Rps15a	Rps26	5034103	5018537	10090.ENSMUSP00000119975	10090.ENSMUSP00000026420	0	0	0	0	0.854	0.958	1	0.72	1	0.174	1	0.998
Rplp2	Rps23	5028293	5024346	10090.ENSMUSP00000081474	10090.ENSMUSP00000054490	0	0	0	0	0.878	0.877	1	0.9	1	0.322	1	0.998
Rps16	Rpl37a	5031918	5025033	10090.ENSMUSP00000103940	10090.ENSMUSP00000058919	0	0	0	0	0.943	0.97	1	0	0	0.35	1	0.998
Rps16	Rps26-ps1	5031918	5027499	10090.ENSMUSP00000103940	10090.ENSMUSP00000076447	0	0	0	0	0.78	0.958	1	0.72	1	0.51	1	0.998
Rps19	Rpl13	5031943	5015324	10090.ENSMUSP00000104067	10090.ENSMUSP00000000756	0	0	0	0	0.875	0.801	1	0.9	1	0.493	1	0.998
Rps8	Rpl7	5031065	5026693	10090.ENSMUSP00000099757	10090.ENSMUSP00000071616	0	0	0	0	0.955	0.821	1	0	0	0.771	1	0.998
Rps16	Rpl10a	5031918	5023403	10090.ENSMUSP00000103940	10090.ENSMUSP00000048469	0.139	0	0	0	0.939	0.971	1	0	0	0.339	1	0.998
Rps28	Rps26-ps1	5033019	5027499	10090.ENSMUSP00000110013	10090.ENSMUSP00000076447	0	0	0	0	0.675	0.945	1	0.72	1	0.653	1	0.998
Rpl30	Rpl34	5032315	5028844	10090.ENSMUSP00000106014	10090.ENSMUSP00000086614	0	0	0	0	0.869	0.801	1	0.9	1	0.469	1	0.998
Rpl38	Rps17	5031605	5028013	10090.ENSMUSP00000102213	10090.ENSMUSP00000079628	0	0	0	0	0.937	0.896	1	0	0	0.766	1	0.998
Dhps	Eif5a	5027697	5023125	10090.ENSMUSP00000077733	10090.ENSMUSP00000047008	0.17	0	0	0	0.089	0.794	1	0.9	1	0.916	1	0.998
Psmd8	Psmb1	5023901	5016329	10090.ENSMUSP00000051657	10090.ENSMUSP00000014913	0	0	0	0	0.81	0.825	1	0.9	1	0.651	1	0.998
Psmc3	Psmb7	5026606	5018980	10090.ENSMUSP00000071054	10090.ENSMUSP00000028083	0.06	0	0	0	0.812	0.82	1	0.9	1	0.563	1	0.998
Rpl34	Rpl36	5028844	5027972	10090.ENSMUSP00000086614	10090.ENSMUSP00000079340	0	0	0	0	0.887	0.71	1	0.9	1	0.51	1	0.998
Rpl31	Rps8	5036727	5031065	10090.ENSMUSP00000137631	10090.ENSMUSP00000099757	0	0	0	0	0.923	0.97	1	0	0	0.572	1	0.998
Rpl39	Rps5	5033187	5015759	10090.ENSMUSP00000110886	10090.ENSMUSP00000004554	0.043	0	0	0	0.889	0.971	1	0	0	0.487	1	0.998
Rps16	Rpl23	5031918	5030904	10090.ENSMUSP00000103940	10090.ENSMUSP00000099435	0.17	0	0	0	0.927	0.971	1	0	0	0.243	1	0.998
Rpl14	Rps27a	5035620	5031143	10090.ENSMUSP00000131489	10090.ENSMUSP00000099909	0	0	0	0	0.881	0.856	1	0.9	1	0.101	1	0.998
Rpl38	Rpl13	5031605	5015324	10090.ENSMUSP00000102213	10090.ENSMUSP00000000756	0	0	0	0	0.865	0.801	1	0.9	1	0.422	1	0.998
Rps21	Rps29	5024953	5021660	10090.ENSMUSP00000058432	10090.ENSMUSP00000038352	0	0	0	0	0.961	0.821	1	0.72	1	0.425	1	0.998
Rps13	Rps26	5034698	5018537	10090.ENSMUSP00000126294	10090.ENSMUSP00000026420	0	0	0	0	0.799	0.958	1	0.72	1	0.344	1	0.998
Rpl14	Rps28	5035620	5033019	10090.ENSMUSP00000131489	10090.ENSMUSP00000110013	0	0	0	0	0.85	0.799	1	0.9	1	0.586	1	0.998
Rps26-ps1	Rps11	5027499	5015656	10090.ENSMUSP00000076447	10090.ENSMUSP00000003521	0	0	0	0	0.781	0.958	1	0.72	1	0.33	1	0.998
Rps15a	Rpsa	5034103	5021080	10090.ENSMUSP00000119975	10090.ENSMUSP00000035105	0.16	0	0	0	0.807	0.958	1	0.72	1	0.334	1	0.998
Rpl5	Rpl32	5028222	5028158	10090.ENSMUSP00000080854	10090.ENSMUSP00000080523	0.172	0	0	0	0.91	0.856	1	0.72	1	0.487	1	0.998
Rpl18	Rpl6	5031793	5020043	10090.ENSMUSP00000103365	10090.ENSMUSP00000031617	0	0	0	0	0.863	0.786	1	0.9	1	0.633	1	0.998
Rpl35a	Rpl4	5033146	5021039	10090.ENSMUSP00000110731	10090.ENSMUSP00000034966	0	0	0	0	0.911	0.831	1	0.9	1	0.33	1	0.998
Rps3a1	Rps26	5019462	5018537	10090.ENSMUSP00000029722	10090.ENSMUSP00000026420	0	0	0	0	0.859	0.958	1	0.72	1	0.284	1	0.998
Rpl37a	Rps26	5025033	5018537	10090.ENSMUSP00000058919	10090.ENSMUSP00000026420	0	0	0	0	0.933	0.958	1	0	0	0.369	1	0.998
Rpl37a	Rpl4	5025033	5021039	10090.ENSMUSP00000058919	10090.ENSMUSP00000034966	0	0	0	0	0.831	0.845	1	0.9	1	0.449	1	0.998
Rps28	Rpl34	5033019	5028844	10090.ENSMUSP00000110013	10090.ENSMUSP00000086614	0	0	0	0	0.912	0.743	1	0.9	1	0.416	1	0.998
Rps8	Rps26-ps1	5031065	5027499	10090.ENSMUSP00000099757	10090.ENSMUSP00000076447	0	0	0	0	0.777	0.958	1	0.72	1	0.339	1	0.998
Rpl35a	Rpl6	5033146	5020043	10090.ENSMUSP00000110731	10090.ENSMUSP00000031617	0	0	0	0	0.867	0.799	1	0.9	1	0.542	1	0.998
Rps27a	Rpl37	5031143	5023036	10090.ENSMUSP00000099909	10090.ENSMUSP00000046506	0	0	0	0	0.828	0.896	1	0.9	1	0.18	1	0.998
Rps19	Rpl4	5031943	5021039	10090.ENSMUSP00000104067	10090.ENSMUSP00000034966	0	0	0	0	0.854	0.831	1	0.9	1	0.369	1	0.998
Atp5j2	Atp5j	5034574	5017869	10090.ENSMUSP00000125504	10090.ENSMUSP00000023608	0	0	0	0	0.877	0.803	1	0.9	1	0.607	1	0.998
Rps15	Rpl8	5026344	5015714	10090.ENSMUSP00000069004	10090.ENSMUSP00000004072	0.164	0	0	0	0.905	0.958	1	0	0	0.587	1	0.998
Cox5b	Uqcrfs1	5028064	5022838	10090.ENSMUSP00000079944	10090.ENSMUSP00000045284	0	0	0	0	0.814	0.731	1	0.9	1	0.662	1	0.998
Rpl39	Rps26-ps1	5033187	5027499	10090.ENSMUSP00000110886	10090.ENSMUSP00000076447	0.105	0	0	0	0.775	0.958	1	0.72	1	0.371	1	0.998
Rps24	Rps10	5034648	5033114	10090.ENSMUSP00000125977	10090.ENSMUSP00000110532	0	0	0	0	0.811	0.801	1	0.72	1	0.885	1	0.998
Rps10	Rpl8	5033114	5015714	10090.ENSMUSP00000110532	10090.ENSMUSP00000004072	0	0	0	0	0.933	0.958	1	0	0	0.429	1	0.998
Rps6	Rplp2	5031125	5028293	10090.ENSMUSP00000099878	10090.ENSMUSP00000081474	0	0	0	0	0.827	0.872	1	0.9	1	0.319	1	0.998
Rps21	Rpl13	5024953	5015324	10090.ENSMUSP00000058432	10090.ENSMUSP00000000756	0	0	0	0	0.931	0.8	1	0.9	1	0.102	1	0.998
Rps16	Rpsa	5031918	5021080	10090.ENSMUSP00000103940	10090.ENSMUSP00000035105	0.113	0	0	0	0.815	0.958	1	0.72	1	0.446	1	0.998
Rpl36	Rps15	5027972	5026344	10090.ENSMUSP00000079340	10090.ENSMUSP00000069004	0	0	0	0	0.896	0.939	1	0	0	0.771	1	0.998
Rps3a1	Rpl13	5019462	5015324	10090.ENSMUSP00000029722	10090.ENSMUSP00000000756	0	0	0	0	0.854	0.801	1	0.9	1	0.419	1	0.998
Rpl34	Rps3	5028844	5020408	10090.ENSMUSP00000086614	10090.ENSMUSP00000032998	0.172	0	0	0	0.862	0.801	1	0.9	1	0.425	1	0.998
Rpl6	Rpl13	5020043	5015324	10090.ENSMUSP00000031617	10090.ENSMUSP00000000756	0	0	0	0	0.93	0.722	1	0.9	1	0.521	1	0.998
Rps15a	Rplp2	5034103	5028293	10090.ENSMUSP00000119975	10090.ENSMUSP00000081474	0	0	0	0	0.881	0.865	1	0.9	1	0.28	1	0.998
Psmc3	Psmb4	5026606	5015885	10090.ENSMUSP00000071054	10090.ENSMUSP00000005923	0	0	0	0	0.725	0.82	1	0.9	1	0.716	1	0.998
Rpl22	Rps27a	5034020	5031143	10090.ENSMUSP00000118787	10090.ENSMUSP00000099909	0	0	0	0	0.845	0.896	1	0.9	1	0.115	1	0.998
Uqcrfs1	Cox5a	5022838	5015244	10090.ENSMUSP00000045284	10090.ENSMUSP00000000090	0	0	0	0	0.837	0.796	1	0.9	1	0.622	1	0.998
Rpl31	Rps13	5036727	5034698	10090.ENSMUSP00000137631	10090.ENSMUSP00000126294	0	0	0	0	0.912	0.97	1	0	0	0.445	1	0.998
Rps8	Rpsa	5031065	5021080	10090.ENSMUSP00000099757	10090.ENSMUSP00000035105	0	0	0	0	0.83	0.958	1	0.72	1	0.452	1	0.998
Rps15a	Rpl4	5034103	5021039	10090.ENSMUSP00000119975	10090.ENSMUSP00000034966	0.17	0	0	0	0.863	0.838	1	0.9	1	0.397	1	0.998
Psma5	Psmb7	5028998	5018980	10090.ENSMUSP00000088057	10090.ENSMUSP00000028083	0	0	0.296	0.603	0.686	0.945	1	0.9	1	0.668	1	0.998
Psma5	Psmd8	5028998	5023901	10090.ENSMUSP00000088057	10090.ENSMUSP00000051657	0	0	0	0	0.778	0.801	1	0.9	1	0.607	1	0.998
Rps28	Rpl4	5033019	5021039	10090.ENSMUSP00000110013	10090.ENSMUSP00000034966	0	0	0	0	0.808	0.785	1	0.9	1	0.573	1	0.998
Rpl10a	Rpl13	5023403	5015324	10090.ENSMUSP00000048469	10090.ENSMUSP00000000756	0	0	0	0	0.938	0.781	1	0.9	1	0.192	1	0.998
Rpl39	Rps16	5033187	5031918	10090.ENSMUSP00000110886	10090.ENSMUSP00000103940	0.08	0	0	0	0.91	0.971	1	0	0	0.363	1	0.998
Rps20	Rps21	5034139	5024953	10090.ENSMUSP00000120528	10090.ENSMUSP00000058432	0	0	0	0	0.908	0.889	1	0.72	1	0.52	1	0.998
Rps27a	Rpl13	5031143	5015324	10090.ENSMUSP00000099909	10090.ENSMUSP00000000756	0	0	0	0	0.938	0.736	1	0.9	1	0.259	1	0.998
Rps20	Rpl8	5034139	5015714	10090.ENSMUSP00000120528	10090.ENSMUSP00000004072	0.164	0	0	0	0.91	0.972	1	0	0	0.466	1	0.998
Rps20	Rpl37a	5034139	5025033	10090.ENSMUSP00000120528	10090.ENSMUSP00000058919	0	0	0	0	0.879	0.97	1	0	0	0.531	1	0.998
Rpl18	Rpl36	5031793	5027972	10090.ENSMUSP00000103365	10090.ENSMUSP00000079340	0	0	0	0	0.865	0.748	1	0.9	1	0.64	1	0.998
Rps19	Rpl6	5031943	5020043	10090.ENSMUSP00000104067	10090.ENSMUSP00000031617	0	0	0	0	0.825	0.799	1	0.9	1	0.665	1	0.998
Rps29	Rpsa	5021660	5021080	10090.ENSMUSP00000038352	10090.ENSMUSP00000035105	0.08	0	0	0	0.706	0.957	1	0.72	1	0.49	1	0.998
Psmb3	Psmc2	5030905	5019763	10090.ENSMUSP00000099436	10090.ENSMUSP00000030769	0	0	0	0	0.811	0.792	1	0.9	1	0.623	1	0.998
Rpl14	Rplp2	5035620	5028293	10090.ENSMUSP00000131489	10090.ENSMUSP00000081474	0	0	0	0	0.837	0.813	1	0.9	1	0.694	1	0.998
Rps15a	Rpl7	5034103	5026693	10090.ENSMUSP00000119975	10090.ENSMUSP00000071616	0.164	0	0	0	0.929	0.958	1	0	0	0.498	1	0.998
Rps6	Rps26-ps1	5031125	5027499	10090.ENSMUSP00000099878	10090.ENSMUSP00000076447	0	0	0	0	0.778	0.958	1	0.72	1	0.334	1	0.998
Rps26-ps1	Rps15	5027499	5026344	10090.ENSMUSP00000076447	10090.ENSMUSP00000069004	0	0	0	0	0.669	0.945	1	0.72	1	0.756	1	0.998
Rps6	Rps26	5031125	5018537	10090.ENSMUSP00000099878	10090.ENSMUSP00000026420	0	0	0	0	0.862	0.958	1	0.72	1	0.334	1	0.998
Atp5f1	Atp5k	5033489	5023828	10090.ENSMUSP00000113022	10090.ENSMUSP00000051222	0	0	0	0	0.808	0.856	1	0.9	1	0.64	1	0.998
Rpsa	Rps11	5021080	5015656	10090.ENSMUSP00000035105	10090.ENSMUSP00000003521	0.154	0	0	0	0.813	0.958	1	0.72	1	0.368	1	0.998
Rps15a	Rpl39	5034103	5033187	10090.ENSMUSP00000119975	10090.ENSMUSP00000110886	0.042	0	0	0	0.912	0.971	1	0	0	0.509	1	0.998
Psmc2	Psmb7	5019763	5018980	10090.ENSMUSP00000030769	10090.ENSMUSP00000028083	0	0	0	0	0.845	0.82	1	0.9	1	0.524	1	0.998
Rps27a	Rpl6	5031143	5020043	10090.ENSMUSP00000099909	10090.ENSMUSP00000031617	0	0	0	0	0.903	0.787	1	0.9	1	0.218	1	0.998
Rpl5	Rps3	5028222	5020408	10090.ENSMUSP00000080854	10090.ENSMUSP00000032998	0.193	0	0	0	0.934	0.819	1	0	0	0.86	1	0.998
Rps17	Rpl36	5028013	5027972	10090.ENSMUSP00000079628	10090.ENSMUSP00000079340	0	0	0	0	0.907	0.95	1	0	0	0.676	1	0.998
Rpl18	Rpl5	5031793	5028222	10090.ENSMUSP00000103365	10090.ENSMUSP00000080854	0	0	0	0	0.895	0.848	1	0.72	1	0.644	1	0.998
Rps26-ps1	Rpl10a	5027499	5023403	10090.ENSMUSP00000076447	10090.ENSMUSP00000048469	0	0	0	0	0.769	0.958	1	0.72	1	0.475	1	0.998
Rps27a	Rpl34	5031143	5028844	10090.ENSMUSP00000099909	10090.ENSMUSP00000086614	0	0	0	0	0.908	0.801	1	0.9	1	0.32	1	0.998
Rpl7	Rpl6	5026693	5020043	10090.ENSMUSP00000071616	10090.ENSMUSP00000031617	0.077	0	0	0	0.911	0.787	1	0.72	1	0.746	1	0.998
Psmd8	Psmb5	5023901	5017622	10090.ENSMUSP00000051657	10090.ENSMUSP00000022803	0	0	0	0	0.734	0.853	1	0.9	1	0.617	1	0.998
Rpl39	Rps3	5033187	5020408	10090.ENSMUSP00000110886	10090.ENSMUSP00000032998	0	0	0	0	0.881	0.97	1	0	0	0.535	1	0.998
Syt1	Stx1a	5031362	5015843	10090.ENSMUSP00000100912	10090.ENSMUSP00000005509	0	0	0	0	0.166	0.896	1	0.9	1	0.823	1	0.998
Uqcr10	Cox5a	5024399	5015244	10090.ENSMUSP00000054856	10090.ENSMUSP00000000090	0	0	0	0	0.86	0.782	1	0.9	1	0.589	1	0.998
Rps20	Rpl32	5034139	5028158	10090.ENSMUSP00000120528	10090.ENSMUSP00000080523	0	0	0	0	0.911	0.971	1	0	0	0.41	1	0.998
Rps13	Rps10	5034698	5033114	10090.ENSMUSP00000126294	10090.ENSMUSP00000110532	0	0	0	0	0.787	0.958	1	0.72	1	0.499	1	0.998
Rps26	Rps9	5018537	5015940	10090.ENSMUSP00000026420	10090.ENSMUSP00000006496	0	0	0	0	0.862	0.958	1	0.72	1	0.111	1	0.998
Rpl34	Rpl13	5028844	5015324	10090.ENSMUSP00000086614	10090.ENSMUSP00000000756	0	0	0	0	0.897	0.741	1	0.9	1	0.422	1	0.998
Rpl18	Rps27a	5031793	5031143	10090.ENSMUSP00000103365	10090.ENSMUSP00000099909	0	0	0	0	0.903	0.888	1	0.9	1	0.168	1	0.998
Rpl35a	Rps26-ps1	5033146	5027499	10090.ENSMUSP00000110731	10090.ENSMUSP00000076447	0	0	0	0	0.778	0.958	1	0	0	0.843	1	0.998
Rpl18	Rps29	5031793	5021660	10090.ENSMUSP00000103365	10090.ENSMUSP00000038352	0	0	0	0	0.856	0.949	1	0.72	1	0.559	1	0.998
Rpl4	Rps14	5021039	5018277	10090.ENSMUSP00000034966	10090.ENSMUSP00000025511	0.139	0	0	0	0.882	0.845	1	0.9	1	0.456	1	0.998
Rps19	Rpl36	5031943	5027972	10090.ENSMUSP00000104067	10090.ENSMUSP00000079340	0	0	0	0	0.881	0.768	1	0.9	1	0.634	1	0.998
Rps24	Rps18	5034648	5016094	10090.ENSMUSP00000125977	10090.ENSMUSP00000008812	0	0	0	0	0.815	0.95	1	0.72	1	0.645	1	0.998
Rplp2	Rpl32	5028293	5028158	10090.ENSMUSP00000081474	10090.ENSMUSP00000080523	0	0	0	0	0.882	0.816	1	0.9	1	0.213	1	0.998
Psmc3	Psma4	5026606	5020992	10090.ENSMUSP00000071054	10090.ENSMUSP00000034848	0.06	0	0	0	0.858	0.82	1	0.9	1	0.512	1	0.998
Rps28	Rps27a	5033019	5031143	10090.ENSMUSP00000110013	10090.ENSMUSP00000099909	0	0	0	0	0.933	0.801	1	0.9	1	0.282	1	0.998
Rpl14	Rps15a	5035620	5034103	10090.ENSMUSP00000131489	10090.ENSMUSP00000119975	0.153	0	0	0	0.872	0.859	1	0.9	1	0.283	1	0.998
Rps10	Rps28	5033114	5033019	10090.ENSMUSP00000110532	10090.ENSMUSP00000110013	0	0	0	0	0.827	0.945	1	0.72	1	0.642	1	0.998
Rpl6	Rps9	5020043	5015940	10090.ENSMUSP00000031617	10090.ENSMUSP00000006496	0.107	0	0	0	0.818	0.797	1	0.9	1	0.574	1	0.998
Rps28	Rpl18	5033019	5031793	10090.ENSMUSP00000110013	10090.ENSMUSP00000103365	0	0	0	0	0.864	0.8	1	0.9	1	0.572	1	0.998
Rpl35a	Rps10	5033146	5033114	10090.ENSMUSP00000110731	10090.ENSMUSP00000110532	0	0	0	0	0.796	0.958	1	0	0	0.887	1	0.998
Rps17	Rpl37	5028013	5023036	10090.ENSMUSP00000079628	10090.ENSMUSP00000046506	0	0	0	0	0.837	0.972	1	0	0	0.648	1	0.998
Rpl14	Rpl34	5035620	5028844	10090.ENSMUSP00000131489	10090.ENSMUSP00000086614	0.107	0	0	0	0.829	0.799	1	0.9	1	0.714	1	0.998
Rpl36	Rps18	5027972	5016094	10090.ENSMUSP00000079340	10090.ENSMUSP00000008812	0	0	0	0	0.666	0.929	1	0.9	1	0.381	1	0.998
Psmc3	Psma6	5026606	5017199	10090.ENSMUSP00000071054	10090.ENSMUSP00000021412	0.06	0	0	0	0.751	0.817	1	0.9	1	0.651	1	0.998
Psmc2	Psma7	5019763	5019262	10090.ENSMUSP00000030769	10090.ENSMUSP00000029082	0	0	0	0	0.789	0.813	1	0.9	1	0.738	1	0.998
Rpl38	Rpl36	5031605	5027972	10090.ENSMUSP00000102213	10090.ENSMUSP00000079340	0	0	0	0	0.884	0.768	1	0.9	1	0.559	1	0.998
Rps20	Rpl10a	5034139	5023403	10090.ENSMUSP00000120528	10090.ENSMUSP00000048469	0.164	0	0	0	0.915	0.97	1	0	0	0.264	1	0.998
Rps20	Rpl5	5034139	5028222	10090.ENSMUSP00000120528	10090.ENSMUSP00000080854	0.172	0	0	0	0.928	0.818	1	0	0	0.867	1	0.998
Uqcrq	Cox5a	5024138	5015244	10090.ENSMUSP00000053145	10090.ENSMUSP00000000090	0	0	0	0	0.813	0.783	1	0.9	1	0.701	1	0.998
Atp5j2	Atp5k	5034574	5023828	10090.ENSMUSP00000125504	10090.ENSMUSP00000051222	0	0	0	0	0.856	0.726	1	0.9	1	0.621	1	0.998
Rpl7	Rpl37	5026693	5023036	10090.ENSMUSP00000071616	10090.ENSMUSP00000046506	0	0	0	0	0.746	0.961	1	0.72	1	0.622	1	0.998
Psmb9	Psma7	5035932	5019262	10090.ENSMUSP00000133499	10090.ENSMUSP00000029082	0	0	0.206	0	0.632	0.95	1	0.9	1	0.337	1	0.998
Rps20	Rpl7	5034139	5026693	10090.ENSMUSP00000120528	10090.ENSMUSP00000071616	0.119	0	0	0	0.905	0.956	1	0	0	0.548	1	0.998
Psma5	Psma7	5028998	5019262	10090.ENSMUSP00000088057	10090.ENSMUSP00000029082	0	0	0.431	0.863	0.788	0.945	1	0.9	1	0.707	1	0.998
Rpl39	Rps8	5033187	5031065	10090.ENSMUSP00000110886	10090.ENSMUSP00000099757	0	0	0	0	0.941	0.97	1	0	0	0.452	1	0.998
Rpl39	Rps3a1	5033187	5019462	10090.ENSMUSP00000110886	10090.ENSMUSP00000029722	0	0	0	0	0.907	0.97	1	0	0	0.561	1	0.998
Rps26-ps1	Rps23	5027499	5024346	10090.ENSMUSP00000076447	10090.ENSMUSP00000054490	0	0	0	0	0.776	0.958	1	0.72	1	0.625	1	0.998
Rps17	Rpl10a	5028013	5023403	10090.ENSMUSP00000079628	10090.ENSMUSP00000048469	0	0	0	0	0.931	0.971	1	0	0	0.446	1	0.998
Rps20	Rpl39	5034139	5033187	10090.ENSMUSP00000120528	10090.ENSMUSP00000110886	0.043	0	0	0	0.882	0.971	1	0	0	0.53	1	0.998
Psma5	Psmb5	5028998	5017622	10090.ENSMUSP00000088057	10090.ENSMUSP00000022803	0	0	0	0.605	0.689	0.956	1	0.9	1	0.734	1	0.998
Rpl31	Rps21	5036727	5024953	10090.ENSMUSP00000137631	10090.ENSMUSP00000058432	0	0	0	0	0.908	0.889	1	0.72	1	0.499	1	0.998
Rpl18	Rplp2	5031793	5028293	10090.ENSMUSP00000103365	10090.ENSMUSP00000081474	0	0	0	0	0.884	0.843	1	0.9	1	0.301	1	0.998
Rps20	Rps26-ps1	5034139	5027499	10090.ENSMUSP00000120528	10090.ENSMUSP00000076447	0	0	0	0	0.769	0.958	1	0.72	1	0.612	1	0.998
Rpl22	Rps17	5034020	5028013	10090.ENSMUSP00000118787	10090.ENSMUSP00000079628	0	0	0	0	0.879	0.971	1	0	0	0.72	1	0.998
Rps25	Rpl6	5027947	5020043	10090.ENSMUSP00000079180	10090.ENSMUSP00000031617	0	0	0	0	0.872	0.797	1	0.9	1	0.656	1	0.998
Rpl23	Rps29	5030904	5021660	10090.ENSMUSP00000099435	10090.ENSMUSP00000038352	0.17	0	0	0	0.874	0.966	1	0	0	0.302	1	0.997
Rps28	Rpl3	5033019	5028126	10090.ENSMUSP00000110013	10090.ENSMUSP00000080354	0	0	0	0	0.799	0.768	1	0.9	1	0.613	1	0.997
Rpl18	Rps17	5031793	5028013	10090.ENSMUSP00000103365	10090.ENSMUSP00000079628	0	0	0	0	0.939	0.887	1	0	0	0.667	1	0.997
Atp5d	Atp5j	5031383	5017869	10090.ENSMUSP00000101006	10090.ENSMUSP00000023608	0	0	0	0	0.824	0.805	1	0.9	1	0.417	1	0.997
Rps10	Rpl37a	5033114	5025033	10090.ENSMUSP00000110532	10090.ENSMUSP00000058919	0	0	0	0	0.902	0.958	1	0	0	0.493	1	0.997
Rpl39	Rps6	5033187	5031125	10090.ENSMUSP00000110886	10090.ENSMUSP00000099878	0	0	0	0	0.882	0.97	1	0	0	0.317	1	0.997
Rpl14	Rpl36	5035620	5027972	10090.ENSMUSP00000131489	10090.ENSMUSP00000079340	0	0	0	0	0.814	0.744	1	0.9	1	0.501	1	0.997
Rpl22	Rps15	5034020	5026344	10090.ENSMUSP00000118787	10090.ENSMUSP00000069004	0	0	0	0	0.824	0.958	1	0	0	0.699	1	0.997
Rpl34	Rps9	5028844	5015940	10090.ENSMUSP00000086614	10090.ENSMUSP00000006496	0	0	0	0	0.824	0.801	1	0.9	1	0.376	1	0.997
Rps24	Rpl39	5034648	5033187	10090.ENSMUSP00000125977	10090.ENSMUSP00000110886	0	0	0	0	0.844	0.962	1	0	0	0.609	1	0.997
Rps20	Rps27a	5034139	5031143	10090.ENSMUSP00000120528	10090.ENSMUSP00000099909	0	0	0	0	0.885	0.896	1	0.72	1	0.221	1	0.997
Rps16	Rps27a	5031918	5031143	10090.ENSMUSP00000103940	10090.ENSMUSP00000099909	0	0	0	0	0.91	0.896	1	0.72	1	0	0	0.997
Eif4b	Rps6	5034963	5031125	10090.ENSMUSP00000127774	10090.ENSMUSP00000099878	0	0	0	0	0.473	0.664	1	0.9	1	0.865	1	0.997
Rpl14	Rps18	5035620	5016094	10090.ENSMUSP00000131489	10090.ENSMUSP00000008812	0.088	0	0	0	0.785	0.764	1	0.9	1	0.59	1	0.997
Rpl39	Rps17	5033187	5028013	10090.ENSMUSP00000110886	10090.ENSMUSP00000079628	0	0	0	0	0.906	0.971	1	0	0	0.303	1	0.997
Psmb3	Psmc3	5030905	5026606	10090.ENSMUSP00000099436	10090.ENSMUSP00000071054	0.06	0	0	0	0.803	0.78	1	0.9	1	0.581	1	0.997
Rps6	Rpl13	5031125	5015324	10090.ENSMUSP00000099878	10090.ENSMUSP00000000756	0	0	0	0	0.839	0.799	1	0.9	1	0.436	1	0.997
Atp5j	Atp5e	5017869	5016447	10090.ENSMUSP00000023608	10090.ENSMUSP00000016396	0	0	0	0	0.871	0.808	1	0.9	1	0.25	1	0.997
Rpl23	Rpl13	5030904	5015324	10090.ENSMUSP00000099435	10090.ENSMUSP00000000756	0	0	0	0	0.878	0.801	1	0.9	1	0.225	1	0.997
Rpl37	Rpl6	5023036	5020043	10090.ENSMUSP00000046506	10090.ENSMUSP00000031617	0.044	0	0	0	0.803	0.775	1	0.9	1	0.599	1	0.997
Rps10	Rps18	5033114	5016094	10090.ENSMUSP00000110532	10090.ENSMUSP00000008812	0	0	0	0	0.674	0.939	1	0.72	1	0.562	1	0.997
Psmc3	Psmb6	5026606	5016580	10090.ENSMUSP00000071054	10090.ENSMUSP00000018430	0	0	0	0	0.738	0.82	1	0.9	1	0.539	1	0.997
Rps26-ps1	Rps3a1	5027499	5019462	10090.ENSMUSP00000076447	10090.ENSMUSP00000029722	0	0	0	0	0.778	0.958	1	0.72	1	0.284	1	0.997
Rpl22	Rps10	5034020	5033114	10090.ENSMUSP00000118787	10090.ENSMUSP00000110532	0	0	0	0	0.803	0.958	1	0	0	0.711	1	0.997
Rpl5	Rps17	5028222	5028013	10090.ENSMUSP00000080854	10090.ENSMUSP00000079628	0	0	0	0	0.867	0.862	1	0	0	0.885	1	0.997
Rps15	Rps18	5026344	5016094	10090.ENSMUSP00000069004	10090.ENSMUSP00000008812	0.139	0	0	0	0.707	0.939	1	0.72	1	0.583	1	0.997
Rps27a	Rps29	5031143	5021660	10090.ENSMUSP00000099909	10090.ENSMUSP00000038352	0	0	0	0	0.903	0.896	1	0.72	1	0.3	1	0.997
Rpl4	Rpl13	5021039	5015324	10090.ENSMUSP00000034966	10090.ENSMUSP00000000756	0	0	0	0	0.869	0.77	1	0.9	1	0.124	1	0.997
Rps19	Rps29	5031943	5021660	10090.ENSMUSP00000104067	10090.ENSMUSP00000038352	0	0	0	0	0.862	0.851	1	0.54	1	0.805	1	0.997
Rplp2	Rpl3	5028293	5028126	10090.ENSMUSP00000081474	10090.ENSMUSP00000080354	0	0	0	0	0.818	0.824	1	0.9	1	0.4	1	0.997
Rpl22	Rpl7	5034020	5026693	10090.ENSMUSP00000118787	10090.ENSMUSP00000071616	0	0	0	0	0.838	0.842	1	0.72	1	0.747	1	0.997
Eif4b	Eif4g1	5034963	5023251	10090.ENSMUSP00000127774	10090.ENSMUSP00000047678	0	0	0	0	0.657	0.682	1	0.9	1	0.825	1	0.997
Rpl38	Rpl4	5031605	5021039	10090.ENSMUSP00000102213	10090.ENSMUSP00000034966	0	0	0	0	0.858	0.819	1	0.9	1	0.309	1	0.997
Cox7c	Uqcrfs1	5033801	5022838	10090.ENSMUSP00000115419	10090.ENSMUSP00000045284	0	0	0	0	0.789	0.796	1	0.9	1	0.498	1	0.997
Rpl31	Rps9	5036727	5015940	10090.ENSMUSP00000137631	10090.ENSMUSP00000006496	0	0	0	0	0.875	0.971	1	0	0	0.367	1	0.997
Psmb10	Psma7	5020832	5019262	10090.ENSMUSP00000034369	10090.ENSMUSP00000029082	0	0	0.268	0.614	0.63	0.929	1	0.9	1	0.545	1	0.997
Rpl34	Rpl3	5028844	5028126	10090.ENSMUSP00000086614	10090.ENSMUSP00000080354	0.132	0	0	0	0.817	0.799	1	0.9	1	0.291	1	0.997
Psmb3	Psmd8	5030905	5023901	10090.ENSMUSP00000099436	10090.ENSMUSP00000051657	0	0	0	0	0.774	0.785	1	0.9	1	0.618	1	0.997
Rps21	Rps18	5024953	5016094	10090.ENSMUSP00000058432	10090.ENSMUSP00000008812	0	0	0	0	0.851	0.767	1	0.9	1	0.251	1	0.997
Rpl3	Rps18	5028126	5016094	10090.ENSMUSP00000080354	10090.ENSMUSP00000008812	0.113	0	0	0	0.816	0.765	1	0.9	1	0.503	1	0.997
Rps15	Rps3	5026344	5020408	10090.ENSMUSP00000069004	10090.ENSMUSP00000032998	0.172	0	0	0	0.843	0.786	1	0.72	1	0.761	1	0.997
Rps28	Rpl6	5033019	5020043	10090.ENSMUSP00000110013	10090.ENSMUSP00000031617	0	0	0	0	0.896	0.688	1	0.9	1	0.267	1	0.997
Rps15	Rpl37a	5026344	5025033	10090.ENSMUSP00000069004	10090.ENSMUSP00000058919	0	0	0	0	0.913	0.958	1	0	0	0.283	1	0.997
Rpl7	Rps5	5026693	5015759	10090.ENSMUSP00000071616	10090.ENSMUSP00000004554	0.119	0	0	0	0.941	0.836	1	0	0	0.715	1	0.997
Rpl30	Rpl13	5032315	5015324	10090.ENSMUSP00000106014	10090.ENSMUSP00000000756	0	0	0	0	0.835	0.8	1	0.9	1	0.231	1	0.997
Rpl35a	Rpl7	5033146	5026693	10090.ENSMUSP00000110731	10090.ENSMUSP00000071616	0	0	0	0	0.938	0.821	1	0.72	1	0.322	1	0.997
Psmc2	Psmb6	5019763	5016580	10090.ENSMUSP00000030769	10090.ENSMUSP00000018430	0	0	0	0	0.719	0.82	1	0.9	1	0.489	1	0.997
Rpl31	Rps19	5036727	5031943	10090.ENSMUSP00000137631	10090.ENSMUSP00000104067	0.193	0	0	0	0.918	0.889	1	0	0	0.697	1	0.997
Rpl22	Rpl34	5034020	5028844	10090.ENSMUSP00000118787	10090.ENSMUSP00000086614	0	0	0	0	0.828	0.801	1	0.9	1	0.286	1	0.997
Rpl32	Rpl6	5028158	5020043	10090.ENSMUSP00000080523	10090.ENSMUSP00000031617	0.097	0	0	0	0.875	0.798	1	0.9	1	0.209	1	0.997
Rpl34	Rplp2	5028844	5028293	10090.ENSMUSP00000086614	10090.ENSMUSP00000081474	0	0	0	0	0.854	0.799	1	0.9	1	0.313	1	0.997
Rps6	Rpl34	5031125	5028844	10090.ENSMUSP00000099878	10090.ENSMUSP00000086614	0	0	0	0	0.852	0.801	1	0.9	1	0.233	1	0.997
Rpl34	Rpl4	5028844	5021039	10090.ENSMUSP00000086614	10090.ENSMUSP00000034966	0	0	0	0	0.82	0.786	1	0.9	1	0.525	1	0.997
Psmd8	Psmb7	5023901	5018980	10090.ENSMUSP00000051657	10090.ENSMUSP00000028083	0	0	0	0	0.57	0.825	1	0.9	1	0.65	1	0.997
Rpl30	Rpl6	5032315	5020043	10090.ENSMUSP00000106014	10090.ENSMUSP00000031617	0	0	0	0	0.865	0.799	1	0.9	1	0.328	1	0.997
Psma3	Psmc3	5034579	5026606	10090.ENSMUSP00000125548	10090.ENSMUSP00000071054	0.06	0	0	0	0.658	0.82	1	0.9	1	0.653	1	0.997
Rpl34	Rpl37	5028844	5023036	10090.ENSMUSP00000086614	10090.ENSMUSP00000046506	0	0	0	0	0.798	0.801	1	0.9	1	0.519	1	0.997
Psmd8	Psma7	5023901	5019262	10090.ENSMUSP00000051657	10090.ENSMUSP00000029082	0	0	0	0	0.677	0.812	1	0.9	1	0.611	1	0.997
Rpl34	Rps23	5028844	5024346	10090.ENSMUSP00000086614	10090.ENSMUSP00000054490	0	0	0	0	0.864	0.801	1	0.9	1	0.151	1	0.997
Rps19	Rpl34	5031943	5028844	10090.ENSMUSP00000104067	10090.ENSMUSP00000086614	0	0	0	0	0.867	0.801	1	0.9	1	0.273	1	0.997
Rpl37a	Rps29	5025033	5021660	10090.ENSMUSP00000058919	10090.ENSMUSP00000038352	0	0	0	0	0.934	0.96	1	0	0	0.122	1	0.997
Rps3	Rpl13	5020408	5015324	10090.ENSMUSP00000032998	10090.ENSMUSP00000000756	0	0	0	0	0.856	0.797	1	0.9	1	0.2	1	0.997
Rplp2	Rpl4	5028293	5021039	10090.ENSMUSP00000081474	10090.ENSMUSP00000034966	0	0	0	0	0.839	0.82	1	0.9	1	0.271	1	0.997
Rps15a	Rpl13	5034103	5015324	10090.ENSMUSP00000119975	10090.ENSMUSP00000000756	0	0	0	0	0.84	0.8	1	0.9	1	0.29	1	0.997
Rpl5	Rpl6	5028222	5020043	10090.ENSMUSP00000080854	10090.ENSMUSP00000031617	0.153	0	0	0	0.872	0.786	1	0.72	1	0.728	1	0.997
Rps10	Rpl32	5033114	5028158	10090.ENSMUSP00000110532	10090.ENSMUSP00000080523	0	0	0	0	0.892	0.958	1	0	0	0.412	1	0.997
Rpl18	Rps26	5031793	5018537	10090.ENSMUSP00000103365	10090.ENSMUSP00000026420	0	0	0	0	0.915	0.801	1	0.72	1	0.578	1	0.997
Rpl37	Rpl4	5023036	5021039	10090.ENSMUSP00000046506	10090.ENSMUSP00000034966	0	0	0	0	0.812	0.806	1	0.9	1	0.46	1	0.997
Rps27a	Rpl36	5031143	5027972	10090.ENSMUSP00000099909	10090.ENSMUSP00000079340	0	0	0	0	0.854	0.766	1	0.9	1	0.254	1	0.997
Rps10	Rpl30	5033114	5032315	10090.ENSMUSP00000110532	10090.ENSMUSP00000106014	0	0	0	0	0.797	0.958	1	0	0	0.701	1	0.997
Rps24	Rps27a	5034648	5031143	10090.ENSMUSP00000125977	10090.ENSMUSP00000099909	0	0	0	0	0.878	0.889	1	0.72	1	0.523	1	0.997
Rps26	Rps18	5018537	5016094	10090.ENSMUSP00000026420	10090.ENSMUSP00000008812	0	0	0	0	0.735	0.939	1	0.72	1	0.449	1	0.997
Rpl34	Rpl6	5028844	5020043	10090.ENSMUSP00000086614	10090.ENSMUSP00000031617	0.107	0	0	0	0.815	0.735	1	0.9	1	0.548	1	0.997
Rps9	Rpl13	5015940	5015324	10090.ENSMUSP00000006496	10090.ENSMUSP00000000756	0	0	0	0	0.845	0.8	1	0.9	1	0.401	1	0.997
Rps21	Rpl6	5024953	5020043	10090.ENSMUSP00000058432	10090.ENSMUSP00000031617	0	0	0	0	0.863	0.784	1	0.9	1	0.358	1	0.997
Rpl14	Rpl39	5035620	5033187	10090.ENSMUSP00000131489	10090.ENSMUSP00000110886	0	0	0	0	0.875	0.794	1	0.72	1	0.739	1	0.997
Rpl22	Rps16	5034020	5031918	10090.ENSMUSP00000118787	10090.ENSMUSP00000103940	0	0	0	0	0.837	0.971	1	0	0	0.572	1	0.997
Rps15a	Rpl34	5034103	5028844	10090.ENSMUSP00000119975	10090.ENSMUSP00000086614	0.172	0	0	0	0.831	0.801	1	0.9	1	0.263	1	0.997
Rps27a	Rpl3	5031143	5028126	10090.ENSMUSP00000099909	10090.ENSMUSP00000080354	0	0	0	0	0.813	0.813	1	0.9	1	0.466	1	0.997
Rpsa	Rps26	5021080	5018537	10090.ENSMUSP00000035105	10090.ENSMUSP00000026420	0	0	0	0	0.748	0.945	1	0.72	1	0.469	1	0.997
Rps15	Rpsa	5026344	5021080	10090.ENSMUSP00000069004	10090.ENSMUSP00000035105	0.122	0	0	0	0.726	0.945	1	0.72	1	0.488	1	0.997
Rps24	Rpl38	5034648	5031605	10090.ENSMUSP00000125977	10090.ENSMUSP00000102213	0	0	0	0	0.91	0.889	1	0	0	0.794	1	0.997
Rpl32	Rps15	5028158	5026344	10090.ENSMUSP00000080523	10090.ENSMUSP00000069004	0.164	0	0	0	0.906	0.958	1	0	0	0.382	1	0.997
Rpl36	Rpl6	5027972	5020043	10090.ENSMUSP00000079340	10090.ENSMUSP00000031617	0	0	0	0	0.829	0.706	1	0.9	1	0.475	1	0.997
Rpl3	Rpl13	5028126	5015324	10090.ENSMUSP00000080354	10090.ENSMUSP00000000756	0	0	0	0	0.838	0.781	1	0.9	1	0.361	1	0.997
Rpl31	Rpl34	5036727	5028844	10090.ENSMUSP00000137631	10090.ENSMUSP00000086614	0	0	0	0	0.872	0.801	1	0.72	1	0.661	1	0.997
Rps25	Rpl13	5027947	5015324	10090.ENSMUSP00000079180	10090.ENSMUSP00000000756	0	0	0	0	0.872	0.801	1	0.9	1	0.265	1	0.997
Rps13	Rpl39	5034698	5033187	10090.ENSMUSP00000126294	10090.ENSMUSP00000110886	0.092	0	0	0	0.873	0.97	1	0	0	0.411	1	0.997
Rps15a	Rps26-ps1	5034103	5027499	10090.ENSMUSP00000119975	10090.ENSMUSP00000076447	0	0	0	0	0.778	0.958	1	0.72	1	0.174	1	0.997
Rpl32	Rpl13	5028158	5015324	10090.ENSMUSP00000080523	10090.ENSMUSP00000000756	0	0	0	0	0.878	0.8	1	0.9	1	0.142	1	0.997
Rpl23	Rps26	5030904	5018537	10090.ENSMUSP00000099435	10090.ENSMUSP00000026420	0	0	0	0	0.912	0.958	1	0	0	0.267	1	0.997
Rps26-ps1	Rps9	5027499	5015940	10090.ENSMUSP00000076447	10090.ENSMUSP00000006496	0	0	0	0	0.778	0.958	1	0.72	1	0.111	1	0.997
Rps15	Rps21	5026344	5024953	10090.ENSMUSP00000069004	10090.ENSMUSP00000058432	0	0	0	0	0.917	0.801	1	0.72	1	0.447	1	0.997
Rps21	Rps26	5024953	5018537	10090.ENSMUSP00000058432	10090.ENSMUSP00000026420	0	0	0	0	0.925	0.801	1	0.72	1	0.426	1	0.997
Cox5b	Uqcrc2	5028064	5020466	10090.ENSMUSP00000079944	10090.ENSMUSP00000033176	0	0	0	0	0.819	0.624	1	0.9	1	0.698	1	0.997
Rpl22	Rplp2	5034020	5028293	10090.ENSMUSP00000118787	10090.ENSMUSP00000081474	0	0	0	0	0.826	0.819	1	0.9	1	0.241	1	0.997
Stxbp1	Snap25	5029101	5019145	10090.ENSMUSP00000089051	10090.ENSMUSP00000028727	0	0	0	0	0.237	0.801	1	0.9	1	0.88	1	0.997
Rplp2	Rpl13	5028293	5015324	10090.ENSMUSP00000081474	10090.ENSMUSP00000000756	0	0	0	0	0.927	0.605	1	0.9	1	0.193	1	0.997
Rpl34	Rps3a1	5028844	5019462	10090.ENSMUSP00000086614	10090.ENSMUSP00000029722	0	0	0	0	0.871	0.801	1	0.9	1	0.22	1	0.997
Rpl23	Rps15	5030904	5026344	10090.ENSMUSP00000099435	10090.ENSMUSP00000069004	0.172	0	0.218	0	0.872	0.958	1	0	0	0.436	1	0.997
Rps24	Rpl37	5034648	5023036	10090.ENSMUSP00000125977	10090.ENSMUSP00000046506	0	0	0	0	0.828	0.97	1	0	0	0.632	1	0.997
Tomm70a	Tomm22	5035199	5017699	10090.ENSMUSP00000129186	10090.ENSMUSP00000023062	0	0	0	0	0.098	0.704	1	0.9	1	0.931	1	0.997
Rpl37	Rps29	5023036	5021660	10090.ENSMUSP00000046506	10090.ENSMUSP00000038352	0	0	0	0	0.808	0.971	1	0	0	0.61	1	0.997
Rps28	Rpsa	5033019	5021080	10090.ENSMUSP00000110013	10090.ENSMUSP00000035105	0.043	0	0	0	0.73	0.945	1	0.72	1	0.524	1	0.997
Rpl35a	Rpl13	5033146	5015324	10090.ENSMUSP00000110731	10090.ENSMUSP00000000756	0	0	0	0	0.871	0.799	1	0.9	1	0.2	1	0.997
Rps19	Rps15	5031943	5026344	10090.ENSMUSP00000104067	10090.ENSMUSP00000069004	0	0	0	0	0.873	0.801	1	0.54	1	0.837	1	0.997
Rpl30	Rps15	5032315	5026344	10090.ENSMUSP00000106014	10090.ENSMUSP00000069004	0	0	0	0	0.859	0.958	1	0	0	0.542	1	0.997
Rpl5	Rpl37a	5028222	5025033	10090.ENSMUSP00000080854	10090.ENSMUSP00000058919	0	0	0	0	0.899	0.856	1	0.72	1	0.455	1	0.997
Rpl38	Rpl7	5031605	5026693	10090.ENSMUSP00000102213	10090.ENSMUSP00000071616	0	0	0	0	0.875	0.852	1	0.72	1	0.614	1	0.997
Rpl31	Rps10	5036727	5033114	10090.ENSMUSP00000137631	10090.ENSMUSP00000110532	0	0	0	0	0.81	0.958	1	0	0	0.741	1	0.997
Rps16	Rpl7	5031918	5026693	10090.ENSMUSP00000103940	10090.ENSMUSP00000071616	0.098	0	0	0	0.898	0.96	1	0	0	0.504	1	0.997
Rps28	Rpl13	5033019	5015324	10090.ENSMUSP00000110013	10090.ENSMUSP00000000756	0	0	0	0	0.896	0.728	1	0.9	1	0.333	1	0.997
Rpl3	Rpl37a	5028126	5025033	10090.ENSMUSP00000080354	10090.ENSMUSP00000058919	0	0	0	0	0.808	0.859	1	0.9	1	0.32	1	0.997
Uqcrh	Cox5a	5027699	5015244	10090.ENSMUSP00000077744	10090.ENSMUSP00000000090	0	0	0	0	0.699	0.778	1	0.9	1	0.727	1	0.997
Rpl22	Rps29	5034020	5021660	10090.ENSMUSP00000118787	10090.ENSMUSP00000038352	0	0	0	0	0.825	0.962	1	0	0	0.644	1	0.997
Rpl14	Rpl13	5035620	5015324	10090.ENSMUSP00000131489	10090.ENSMUSP00000000756	0	0	0	0	0.866	0.767	1	0.9	1	0.415	1	0.997
Rplp2	Rps18	5028293	5016094	10090.ENSMUSP00000081474	10090.ENSMUSP00000008812	0	0	0	0	0.768	0.763	1	0.9	1	0.513	1	0.996
Rpl36	Rpl13	5027972	5015324	10090.ENSMUSP00000079340	10090.ENSMUSP00000000756	0	0	0	0	0.837	0.67	1	0.9	1	0.5	1	0.996
Rps13	Rpl34	5034698	5028844	10090.ENSMUSP00000126294	10090.ENSMUSP00000086614	0	0	0	0	0.815	0.801	1	0.9	1	0.221	1	0.996
Rplp2	Rpl36	5028293	5027972	10090.ENSMUSP00000081474	10090.ENSMUSP00000079340	0	0	0	0	0.794	0.762	1	0.9	1	0.368	1	0.996
Rpl22	Rpl13	5034020	5015324	10090.ENSMUSP00000118787	10090.ENSMUSP00000000756	0	0	0	0	0.835	0.801	1	0.9	1	0.165	1	0.996
Rps26-ps1	Rpl37	5027499	5023036	10090.ENSMUSP00000076447	10090.ENSMUSP00000046506	0	0	0	0	0.764	0.958	1	0	0	0.627	1	0.996
Rpl7	Rps15	5026693	5026344	10090.ENSMUSP00000071616	10090.ENSMUSP00000069004	0.119	0	0	0	0.861	0.944	1	0	0	0.513	1	0.996
Rpl36	Rps3	5027972	5020408	10090.ENSMUSP00000079340	10090.ENSMUSP00000032998	0	0	0	0	0.826	0.73	1	0.9	1	0.385	1	0.996
Rpl37	Rpl13	5023036	5015324	10090.ENSMUSP00000046506	10090.ENSMUSP00000000756	0	0	0	0	0.786	0.801	1	0.9	1	0.336	1	0.996
Rps16	Rpl37	5031918	5023036	10090.ENSMUSP00000103940	10090.ENSMUSP00000046506	0	0	0	0	0.828	0.972	1	0	0	0.331	1	0.996
Cox5b	Uqcr10	5028064	5024399	10090.ENSMUSP00000079944	10090.ENSMUSP00000054856	0	0	0	0	0.856	0.624	1	0.9	1	0.486	1	0.996
Rps13	Rpl13	5034698	5015324	10090.ENSMUSP00000126294	10090.ENSMUSP00000000756	0	0	0	0	0.81	0.801	1	0.9	1	0.098	1	0.996
Rps15	Rpl10a	5026344	5023403	10090.ENSMUSP00000069004	10090.ENSMUSP00000048469	0.164	0	0	0	0.873	0.958	1	0	0	0.3	1	0.996
Rpl7	Rps29	5026693	5021660	10090.ENSMUSP00000071616	10090.ENSMUSP00000038352	0.098	0	0	0	0.839	0.942	1	0	0	0.67	1	0.996
Cox5b	Uqcrq	5028064	5024138	10090.ENSMUSP00000079944	10090.ENSMUSP00000053145	0	0	0	0	0.797	0.712	1	0.9	1	0.508	1	0.996
Atp5o	Atp5e	5017883	5016447	10090.ENSMUSP00000023677	10090.ENSMUSP00000016396	0	0	0	0	0.548	0.796	1	0.9	1	0.69	1	0.996
Rps19	Rps26-ps1	5031943	5027499	10090.ENSMUSP00000104067	10090.ENSMUSP00000076447	0	0	0	0	0.782	0.801	1	0.54	1	0.831	1	0.996
Rps15	Rpl37	5026344	5023036	10090.ENSMUSP00000069004	10090.ENSMUSP00000046506	0	0	0	0	0.798	0.958	1	0	0	0.671	1	0.996
Rpl6	Rps18	5020043	5016094	10090.ENSMUSP00000031617	10090.ENSMUSP00000008812	0.088	0	0	0	0.767	0.706	1	0.9	1	0.56	1	0.996
Rpl5	Rpl37	5028222	5023036	10090.ENSMUSP00000080854	10090.ENSMUSP00000046506	0	0	0	0	0.809	0.847	1	0.72	1	0.616	1	0.996
Rpl31	Rplp2	5036727	5028293	10090.ENSMUSP00000137631	10090.ENSMUSP00000081474	0.155	0	0	0	0.877	0.8	1	0.72	1	0.501	1	0.996
Rpl31	Rpl4	5036727	5021039	10090.ENSMUSP00000137631	10090.ENSMUSP00000034966	0	0	0	0	0.883	0.798	1	0.72	1	0.555	1	0.996
Rpl36	Rps26	5027972	5018537	10090.ENSMUSP00000079340	10090.ENSMUSP00000026420	0	0	0	0	0.886	0.938	1	0	0	0.597	1	0.996
Rpl31	Rps15	5036727	5026344	10090.ENSMUSP00000137631	10090.ENSMUSP00000069004	0	0	0	0	0.828	0.958	1	0	0	0.504	1	0.996
Rps26-ps1	Rpsa	5027499	5021080	10090.ENSMUSP00000076447	10090.ENSMUSP00000035105	0	0	0	0	0.671	0.945	1	0.72	1	0.469	1	0.996
Rpsa	Rpl8	5021080	5015714	10090.ENSMUSP00000035105	10090.ENSMUSP00000004072	0.124	0	0	0	0.835	0.958	1	0	0	0.458	1	0.996
Rpl39	Rpl36	5033187	5027972	10090.ENSMUSP00000110886	10090.ENSMUSP00000079340	0	0	0	0	0.731	0.946	1	0.54	1	0.474	1	0.996
Rpl37	Rps26	5023036	5018537	10090.ENSMUSP00000046506	10090.ENSMUSP00000026420	0	0	0	0	0.793	0.958	1	0	0	0.627	1	0.996
Rpl39	Rps15	5033187	5026344	10090.ENSMUSP00000110886	10090.ENSMUSP00000069004	0.042	0	0	0	0.836	0.958	1	0	0	0.586	1	0.996
Rpl4	Rps18	5021039	5016094	10090.ENSMUSP00000034966	10090.ENSMUSP00000008812	0.113	0	0	0	0.755	0.757	1	0.9	1	0.455	1	0.996
Rps20	Rpl38	5034139	5031605	10090.ENSMUSP00000120528	10090.ENSMUSP00000102213	0	0	0	0	0.882	0.896	1	0	0	0.727	1	0.996
Rps20	Rpl18	5034139	5031793	10090.ENSMUSP00000120528	10090.ENSMUSP00000103365	0.042	0	0	0	0.881	0.957	1	0	0	0.351	1	0.996
Cox7c	Uqcr10	5033801	5024399	10090.ENSMUSP00000115419	10090.ENSMUSP00000054856	0	0	0	0	0.81	0.747	1	0.9	1	0.41	1	0.996
Rps27a	Rps26	5031143	5018537	10090.ENSMUSP00000099909	10090.ENSMUSP00000026420	0	0	0	0	0.906	0.801	1	0.72	1	0.422	1	0.996
Rps19	Rpl7	5031943	5026693	10090.ENSMUSP00000104067	10090.ENSMUSP00000071616	0	0	0	0	0.927	0.822	1	0	0	0.774	1	0.996
Rpl3	Rpl36	5028126	5027972	10090.ENSMUSP00000080354	10090.ENSMUSP00000079340	0	0	0	0	0.776	0.76	1	0.9	1	0.423	1	0.996
Rps10	Rpl36	5033114	5027972	10090.ENSMUSP00000110532	10090.ENSMUSP00000079340	0	0	0	0	0.846	0.939	1	0	0	0.668	1	0.996
Rpl38	Rps18	5031605	5016094	10090.ENSMUSP00000102213	10090.ENSMUSP00000008812	0	0	0	0	0.787	0.768	1	0.9	1	0.291	1	0.996
Rpl31	Rpl36	5036727	5027972	10090.ENSMUSP00000137631	10090.ENSMUSP00000079340	0	0	0	0	0.728	0.949	1	0.54	1	0.46	1	0.996
Rps10	Rpsa	5033114	5021080	10090.ENSMUSP00000110532	10090.ENSMUSP00000035105	0	0	0	0	0.694	0.945	1	0.72	1	0.421	1	0.996
Rpl26	Rpsa	5026969	5021080	10090.ENSMUSP00000073175	10090.ENSMUSP00000035105	0.107	0	0.258	0	0.826	0.958	1	0	0	0.336	1	0.996
Cox7c	Uqcrh	5033801	5027699	10090.ENSMUSP00000115419	10090.ENSMUSP00000077744	0	0	0	0	0.921	0	0	0.9	1	0.555	1	0.996
Rpsa	Rps18	5021080	5016094	10090.ENSMUSP00000035105	10090.ENSMUSP00000008812	0.113	0	0	0	0.667	0.939	1	0.72	1	0.327	1	0.996
Rplp2	Rpl5	5028293	5028222	10090.ENSMUSP00000081474	10090.ENSMUSP00000080854	0	0	0	0	0.823	0.817	1	0.72	1	0.668	1	0.996
Rps6	Rpl7	5031125	5026693	10090.ENSMUSP00000099878	10090.ENSMUSP00000071616	0	0	0	0	0.938	0.84	1	0	0	0.619	1	0.995
Psmb10	Psmc2	5020832	5019763	10090.ENSMUSP00000034369	10090.ENSMUSP00000030769	0	0	0	0	0.754	0.74	1	0.9	1	0.402	1	0.995
Psma2	Psmc3	5035328	5026606	10090.ENSMUSP00000129767	10090.ENSMUSP00000071054	0	0	0	0	0.813	0.958	1	0	0	0.479	1	0.995
Rps16	Rpl36	5031918	5027972	10090.ENSMUSP00000103940	10090.ENSMUSP00000079340	0	0	0	0	0.81	0.95	1	0	0	0.579	1	0.995
Rpl7	Rpl13	5026693	5015324	10090.ENSMUSP00000071616	10090.ENSMUSP00000000756	0	0	0	0	0.904	0.781	1	0.72	1	0.386	1	0.995
Rpl7	Rps3	5026693	5020408	10090.ENSMUSP00000071616	10090.ENSMUSP00000032998	0.164	0	0	0	0.923	0.798	1	0	0	0.691	1	0.995
Rpl36	Rps29	5027972	5021660	10090.ENSMUSP00000079340	10090.ENSMUSP00000038352	0	0	0	0	0.847	0.932	1	0	0	0.571	1	0.995
Rpl39	Rpl5	5033187	5028222	10090.ENSMUSP00000110886	10090.ENSMUSP00000080854	0	0	0	0	0.82	0.811	1	0.72	1	0.627	1	0.995
Rps27a	Rps18	5031143	5016094	10090.ENSMUSP00000099909	10090.ENSMUSP00000008812	0	0	0	0	0.821	0.768	1	0.9	1	0.132	1	0.995
Rpl14	Rps16	5035620	5031918	10090.ENSMUSP00000131489	10090.ENSMUSP00000103940	0.088	0	0	0	0.909	0.858	1	0	0	0.658	1	0.995
Rpl39	Rpl4	5033187	5021039	10090.ENSMUSP00000110886	10090.ENSMUSP00000034966	0.08	0	0	0	0.821	0.804	1	0.72	1	0.591	1	0.995
Rpl5	Rps23	5028222	5024346	10090.ENSMUSP00000080854	10090.ENSMUSP00000054490	0.172	0	0	0	0.916	0.879	1	0	0	0.575	1	0.995
Uqcrh	Cox6c	5027699	5016303	10090.ENSMUSP00000077744	10090.ENSMUSP00000014457	0	0	0	0	0.914	0	0	0.9	1	0.52	1	0.995
Rpl34	Rpl7	5028844	5026693	10090.ENSMUSP00000086614	10090.ENSMUSP00000071616	0.119	0	0	0	0.871	0.799	1	0.72	1	0.463	1	0.995
Rplp2	Rpl7	5028293	5026693	10090.ENSMUSP00000081474	10090.ENSMUSP00000071616	0	0	0	0	0.84	0.816	1	0.72	1	0.55	1	0.995
Psmb9	Psmd8	5035932	5023901	10090.ENSMUSP00000133499	10090.ENSMUSP00000051657	0	0	0	0	0.757	0.733	1	0.9	1	0.409	1	0.995
Rpl7	Rps18	5026693	5016094	10090.ENSMUSP00000071616	10090.ENSMUSP00000008812	0.098	0	0	0	0.816	0.942	1	0	0	0.585	1	0.995
Rps20	Rpl3	5034139	5028126	10090.ENSMUSP00000120528	10090.ENSMUSP00000080354	0.139	0	0	0	0.916	0.821	1	0	0	0.71	1	0.995
Rpl39	Rplp2	5033187	5028293	10090.ENSMUSP00000110886	10090.ENSMUSP00000081474	0	0	0	0	0.837	0.804	1	0.72	1	0.596	1	0.995
Rps24	Rpl22	5034648	5034020	10090.ENSMUSP00000125977	10090.ENSMUSP00000118787	0	0	0	0	0.914	0.819	1	0	0	0.744	1	0.995
Rps26-ps1	Rps18	5027499	5016094	10090.ENSMUSP00000076447	10090.ENSMUSP00000008812	0	0	0	0	0.618	0.939	1	0.72	1	0.447	1	0.995
Rpl22	Rps26	5034020	5018537	10090.ENSMUSP00000118787	10090.ENSMUSP00000026420	0	0	0	0	0.829	0.958	1	0	0	0.409	1	0.995
Rps10	Rpl23	5033114	5030904	10090.ENSMUSP00000110532	10090.ENSMUSP00000099435	0	0	0	0	0.867	0.958	1	0	0	0.226	1	0.995
Rpl31	Rpl3	5036727	5028126	10090.ENSMUSP00000137631	10090.ENSMUSP00000080354	0	0	0	0	0.832	0.817	1	0.72	1	0.494	1	0.995
Rps24	Rpl36	5034648	5027972	10090.ENSMUSP00000125977	10090.ENSMUSP00000079340	0	0	0	0	0.792	0.938	1	0	0	0.703	1	0.995
Rps10	Rps21	5033114	5024953	10090.ENSMUSP00000110532	10090.ENSMUSP00000058432	0	0	0	0	0.908	0.801	1	0.72	1	0.2	1	0.995
Rps16	Rpl5	5031918	5028222	10090.ENSMUSP00000103940	10090.ENSMUSP00000080854	0.17	0	0	0	0.933	0.866	1	0	0	0.471	1	0.995
Rpl5	Rps9	5028222	5015940	10090.ENSMUSP00000080854	10090.ENSMUSP00000006496	0.172	0	0	0	0.874	0.852	1	0	0	0.759	1	0.995
Psmb9	Psmc3	5035932	5026606	10090.ENSMUSP00000133499	10090.ENSMUSP00000071054	0	0	0	0	0.699	0.731	1	0.9	1	0.468	1	0.995
Rps16	Rpl3	5031918	5028126	10090.ENSMUSP00000103940	10090.ENSMUSP00000080354	0.113	0	0	0	0.923	0.862	1	0	0	0.547	1	0.995
Psma2	Psmc2	5035328	5019763	10090.ENSMUSP00000129767	10090.ENSMUSP00000030769	0	0	0	0	0.857	0.896	1	0	0	0.637	1	0.994
Rpl32	Rps26-ps1	5028158	5027499	10090.ENSMUSP00000080523	10090.ENSMUSP00000076447	0	0	0	0	0.781	0.958	1	0.36	1	0.178	1	0.994
Rps10	Rpl10a	5033114	5023403	10090.ENSMUSP00000110532	10090.ENSMUSP00000048469	0	0	0	0	0.93	0.801	1	0	0	0.635	1	0.994
Rpl30	Rpsa	5032315	5021080	10090.ENSMUSP00000106014	10090.ENSMUSP00000035105	0	0	0	0	0.813	0.958	1	0	0	0.408	1	0.994
Rpl36	Rpl4	5027972	5021039	10090.ENSMUSP00000079340	10090.ENSMUSP00000034966	0	0	0	0	0.7	0.755	1	0.9	1	0.386	1	0.994
Rpl10a	Rpsa	5023403	5021080	10090.ENSMUSP00000048469	10090.ENSMUSP00000035105	0	0	0	0	0.81	0.958	1	0	0	0.346	1	0.994
Rpl23	Rpsa	5030904	5021080	10090.ENSMUSP00000099435	10090.ENSMUSP00000035105	0.164	0	0	0	0.813	0.958	1	0	0	0.306	1	0.994
Atp5f1	Atp5e	5033489	5016447	10090.ENSMUSP00000113022	10090.ENSMUSP00000016396	0	0	0	0	0.324	0.796	1	0.9	1	0.668	1	0.994
Rpl31	Rps27a	5036727	5031143	10090.ENSMUSP00000137631	10090.ENSMUSP00000099909	0	0	0	0	0.909	0.896	1	0	0	0.416	1	0.994
Rpl18	Rps26-ps1	5031793	5027499	10090.ENSMUSP00000103365	10090.ENSMUSP00000076447	0	0	0	0	0.778	0.801	1	0.72	1	0.578	1	0.994
Rps13	Rpl7	5034698	5026693	10090.ENSMUSP00000126294	10090.ENSMUSP00000071616	0	0	0	0	0.892	0.821	1	0	0	0.759	1	0.994
Rps21	Rpsa	5024953	5021080	10090.ENSMUSP00000058432	10090.ENSMUSP00000035105	0	0	0	0	0.818	0.801	1	0.72	1	0.495	1	0.994
Rps10	Rpl37	5033114	5023036	10090.ENSMUSP00000110532	10090.ENSMUSP00000046506	0	0	0	0	0.781	0.958	1	0	0	0.412	1	0.994
Psmb9	Psmc2	5035932	5019763	10090.ENSMUSP00000133499	10090.ENSMUSP00000030769	0	0	0	0	0.7	0.731	1	0.9	1	0.391	1	0.994
Rpl39	Rpl34	5033187	5028844	10090.ENSMUSP00000110886	10090.ENSMUSP00000086614	0	0	0	0	0.865	0.801	1	0.72	1	0.385	1	0.994
Uqcr10	Cox6c	5024399	5016303	10090.ENSMUSP00000054856	10090.ENSMUSP00000014457	0	0	0	0	0.836	0.663	1	0.9	1	0.169	1	0.994
Psmc3	Psmb10	5026606	5020832	10090.ENSMUSP00000071054	10090.ENSMUSP00000034369	0.06	0	0	0	0.704	0.731	1	0.9	1	0.359	1	0.994
Rpl5	Rps21	5028222	5024953	10090.ENSMUSP00000080854	10090.ENSMUSP00000058432	0	0	0	0	0.908	0.826	1	0	0	0.646	1	0.993
Rpl5	Rps26	5028222	5018537	10090.ENSMUSP00000080854	10090.ENSMUSP00000026420	0	0	0	0	0.84	0.8	1	0	0	0.821	1	0.993
Rpl39	Rps10	5033187	5033114	10090.ENSMUSP00000110886	10090.ENSMUSP00000110532	0	0	0	0	0.764	0.958	1	0	0	0.348	1	0.993
Rpl35a	Rpsa	5033146	5021080	10090.ENSMUSP00000110731	10090.ENSMUSP00000035105	0	0	0	0	0.815	0.958	1	0	0	0.267	1	0.993
Rpl31	Rpsa	5036727	5021080	10090.ENSMUSP00000137631	10090.ENSMUSP00000035105	0	0	0	0	0.806	0.958	1	0	0	0.239	1	0.993
Rps26-ps1	Rpl37a	5027499	5025033	10090.ENSMUSP00000076447	10090.ENSMUSP00000058919	0	0	0	0	0.777	0.958	1	0	0	0.369	1	0.993
Rpl5	Rps15	5028222	5026344	10090.ENSMUSP00000080854	10090.ENSMUSP00000069004	0.172	0	0	0	0.795	0.792	1	0	0	0.846	1	0.993
Rps16	Rpl6	5031918	5020043	10090.ENSMUSP00000103940	10090.ENSMUSP00000031617	0.088	0	0	0	0.862	0.797	1	0	0	0.758	1	0.993
Rps10	Rpl19	5033114	5016512	10090.ENSMUSP00000110532	10090.ENSMUSP00000017548	0	0	0	0	0.931	0.801	1	0	0	0.579	1	0.993
Rpl22	Rps26-ps1	5034020	5027499	10090.ENSMUSP00000118787	10090.ENSMUSP00000076447	0	0	0	0	0.751	0.958	1	0	0	0.409	1	0.993
Rpl34	Rpl5	5028844	5028222	10090.ENSMUSP00000086614	10090.ENSMUSP00000080854	0.172	0	0	0	0.844	0.8	1	0.72	1	0.207	1	0.993
Rpl39	Rpsa	5033187	5021080	10090.ENSMUSP00000110886	10090.ENSMUSP00000035105	0.086	0	0	0	0.804	0.958	1	0	0	0.291	1	0.993
Rpl14	Rps17	5035620	5028013	10090.ENSMUSP00000131489	10090.ENSMUSP00000079628	0	0	0	0	0.886	0.873	1	0	0	0.568	1	0.993
Rpl22	Rpsa	5034020	5021080	10090.ENSMUSP00000118787	10090.ENSMUSP00000035105	0	0	0	0	0.72	0.958	1	0	0	0.482	1	0.993
Rps16	Rplp2	5031918	5028293	10090.ENSMUSP00000103940	10090.ENSMUSP00000081474	0	0	0	0	0.938	0.856	1	0	0	0.316	1	0.993
Rpl35a	Rps15	5033146	5026344	10090.ENSMUSP00000110731	10090.ENSMUSP00000069004	0	0	0	0	0.871	0.801	1	0	0	0.773	1	0.993
Rpl37a	Rpsa	5025033	5021080	10090.ENSMUSP00000058919	10090.ENSMUSP00000035105	0	0	0	0	0.813	0.958	1	0	0	0.272	1	0.993
Rps24	Rpsa	5034648	5021080	10090.ENSMUSP00000125977	10090.ENSMUSP00000035105	0	0	0	0	0.808	0.789	1	0.72	1	0.51	1	0.993
Rpl14	Rps24	5035620	5034648	10090.ENSMUSP00000131489	10090.ENSMUSP00000125977	0	0	0	0	0.867	0.819	1	0	0	0.767	1	0.993
Cox5b	Cox6c	5028064	5016303	10090.ENSMUSP00000079944	10090.ENSMUSP00000014457	0	0	0	0	0.621	0.544	1	0.9	1	0.681	1	0.993
Rpl34	Rps18	5028844	5016094	10090.ENSMUSP00000086614	10090.ENSMUSP00000008812	0	0	0	0	0.734	0.711	1	0.9	1	0.125	1	0.992
Rps19	Rpsa	5031943	5021080	10090.ENSMUSP00000104067	10090.ENSMUSP00000035105	0	0	0	0	0.815	0.801	1	0.54	1	0.585	1	0.992
Psmd8	Psmb10	5023901	5020832	10090.ENSMUSP00000051657	10090.ENSMUSP00000034369	0	0	0	0	0.499	0.751	1	0.9	1	0.503	1	0.992
Rpl38	Rps26-ps1	5031605	5027499	10090.ENSMUSP00000102213	10090.ENSMUSP00000076447	0	0	0	0	0.777	0.801	1	0.72	1	0.502	1	0.992
Rpl32	Rpsa	5028158	5021080	10090.ENSMUSP00000080523	10090.ENSMUSP00000035105	0	0	0	0	0.818	0.958	1	0	0	0.099	1	0.992
Rps27a	Rps15	5031143	5026344	10090.ENSMUSP00000099909	10090.ENSMUSP00000069004	0	0	0	0	0.823	0.801	1	0.72	1	0.369	1	0.992
Rps17	Rpl4	5028013	5021039	10090.ENSMUSP00000079628	10090.ENSMUSP00000034966	0	0	0	0	0.884	0.829	1	0	0	0.658	1	0.992
Rpl23	Rps26-ps1	5030904	5027499	10090.ENSMUSP00000099435	10090.ENSMUSP00000076447	0	0	0	0	0.778	0.958	1	0	0	0.267	1	0.992
Rplp2	Rps29	5028293	5021660	10090.ENSMUSP00000081474	10090.ENSMUSP00000038352	0	0	0	0	0.907	0.776	1	0	0	0.649	1	0.992
Rps17	Rpl6	5028013	5020043	10090.ENSMUSP00000079628	10090.ENSMUSP00000031617	0	0	0	0	0.905	0.796	1	0	0	0.625	1	0.992
Rpl3	Rpl37	5028126	5023036	10090.ENSMUSP00000080354	10090.ENSMUSP00000046506	0	0	0	0	0.505	0.824	1	0.9	1	0.275	1	0.992
Rps10	Rpl18	5033114	5031793	10090.ENSMUSP00000110532	10090.ENSMUSP00000103365	0	0	0	0	0.905	0.799	1	0	0	0.647	1	0.992
Rpl37	Rpsa	5023036	5021080	10090.ENSMUSP00000046506	10090.ENSMUSP00000035105	0	0	0	0	0.788	0.958	1	0	0	0.222	1	0.992
Rps16	Rpl38	5031918	5031605	10090.ENSMUSP00000103940	10090.ENSMUSP00000102213	0	0	0	0	0.91	0.896	1	0	0	0.307	1	0.992
Rpl39	Rps19	5033187	5031943	10090.ENSMUSP00000110886	10090.ENSMUSP00000104067	0	0	0	0	0.881	0.889	1	0	0	0.509	1	0.992
Rpl31	Rpl6	5036727	5020043	10090.ENSMUSP00000137631	10090.ENSMUSP00000031617	0	0	0	0	0.827	0.759	1	0.72	1	0.41	1	0.992
Rpl14	Rps15	5035620	5026344	10090.ENSMUSP00000131489	10090.ENSMUSP00000069004	0.107	0	0	0	0.817	0.788	1	0	0	0.783	1	0.991
Rpl39	Rps18	5033187	5016094	10090.ENSMUSP00000110886	10090.ENSMUSP00000008812	0.075	0	0	0	0.793	0.95	1	0	0	0.185	1	0.991
Rps10	Rps27a	5033114	5031143	10090.ENSMUSP00000110532	10090.ENSMUSP00000099909	0	0	0	0	0.81	0.801	1	0.72	1	0.271	1	0.991
Psma2	Psmd8	5035328	5023901	10090.ENSMUSP00000129767	10090.ENSMUSP00000051657	0	0	0	0	0.808	0.896	1	0	0	0.62	1	0.991
Rps27a	Rps26-ps1	5031143	5027499	10090.ENSMUSP00000099909	10090.ENSMUSP00000076447	0	0	0	0	0.778	0.801	1	0.72	1	0.422	1	0.991
Psmb10	Psmb5	5020832	5017622	10090.ENSMUSP00000034369	10090.ENSMUSP00000022803	0	0	0	0.665	0.575	0.738	1	0.9	1	0.809	1	0.991
Rpl5	Rps26-ps1	5028222	5027499	10090.ENSMUSP00000080854	10090.ENSMUSP00000076447	0	0	0	0	0.778	0.8	1	0	0	0.821	1	0.991
Rps20	Rpl36	5034139	5027972	10090.ENSMUSP00000120528	10090.ENSMUSP00000079340	0	0	0	0	0.734	0.948	1	0	0	0.444	1	0.991
Rps27a	Rplp2	5031143	5028293	10090.ENSMUSP00000099909	10090.ENSMUSP00000081474	0	0	0	0	0.877	0.229	1	0.9	1	0.197	1	0.991
Rps10	Rpl5	5033114	5028222	10090.ENSMUSP00000110532	10090.ENSMUSP00000080854	0	0	0	0	0.787	0.792	1	0	0	0.82	1	0.991
Syt1	Vamp2	5031362	5017153	10090.ENSMUSP00000100912	10090.ENSMUSP00000021273	0	0	0	0	0.174	0.285	1	0.9	1	0.877	1	0.991
Rps27a	Rpl5	5031143	5028222	10090.ENSMUSP00000099909	10090.ENSMUSP00000080854	0	0	0	0	0.906	0.847	1	0	0	0.428	1	0.991
Rps18	Rpl13	5016094	5015324	10090.ENSMUSP00000008812	10090.ENSMUSP00000000756	0	0	0	0	0.709	0.71	1	0.9	1	0.107	1	0.991
Rps26-ps1	Rps21	5027499	5024953	10090.ENSMUSP00000076447	10090.ENSMUSP00000058432	0	0	0	0	0.778	0.801	1	0.72	1	0.426	1	0.991
Rpl39	Rps27a	5033187	5031143	10090.ENSMUSP00000110886	10090.ENSMUSP00000099909	0	0	0	0	0.909	0.894	1	0	0	0.158	1	0.991
Rpl5	Rpl13	5028222	5015324	10090.ENSMUSP00000080854	10090.ENSMUSP00000000756	0	0	0	0	0.821	0.782	1	0.72	1	0.272	1	0.991
Psmb9	Psmb7	5035932	5018980	10090.ENSMUSP00000133499	10090.ENSMUSP00000028083	0	0	0.219	0.739	0.636	0.696	1	0.9	1	0.795	1	0.99
Rps29	Rpl6	5021660	5020043	10090.ENSMUSP00000038352	10090.ENSMUSP00000031617	0.088	0	0	0	0.781	0.674	1	0.72	1	0.577	1	0.99
Uqcrfs1	Cox6c	5022838	5016303	10090.ENSMUSP00000045284	10090.ENSMUSP00000014457	0	0	0	0	0.274	0.815	1	0.9	1	0.344	1	0.99
Rplp2	Rps17	5028293	5028013	10090.ENSMUSP00000081474	10090.ENSMUSP00000079628	0	0	0	0	0.884	0.851	1	0	0	0.483	1	0.99
Rpl39	Rpl3	5033187	5028126	10090.ENSMUSP00000110886	10090.ENSMUSP00000080354	0.057	0	0	0	0.647	0.814	1	0.72	1	0.52	1	0.99
Rpl14	Rps20	5035620	5034139	10090.ENSMUSP00000131489	10090.ENSMUSP00000120528	0.107	0	0	0	0.912	0.808	1	0	0	0.417	1	0.99
Psma1	Psmc2	5020413	5019763	10090.ENSMUSP00000033008	10090.ENSMUSP00000030769	0	0	0	0	0.814	0.896	1	0	0	0.57	1	0.99
Rpl5	Rps29	5028222	5021660	10090.ENSMUSP00000080854	10090.ENSMUSP00000038352	0.17	0	0	0	0.814	0.767	1	0	0	0.758	1	0.99
Rps24	Rpl34	5034648	5028844	10090.ENSMUSP00000125977	10090.ENSMUSP00000086614	0	0	0	0	0.873	0.801	1	0	0	0.65	1	0.99
Rpl34	Rps17	5028844	5028013	10090.ENSMUSP00000086614	10090.ENSMUSP00000079628	0	0	0	0	0.92	0.801	1	0	0	0.433	1	0.99
Rpl39	Rpl13	5033187	5015324	10090.ENSMUSP00000110886	10090.ENSMUSP00000000756	0	0	0	0	0.825	0.789	1	0.72	1	0.156	1	0.99
Psmb10	Psmb6	5020832	5016580	10090.ENSMUSP00000034369	10090.ENSMUSP00000018430	0	0	0	0.731	0.651	0.682	1	0.9	1	0.705	1	0.99
Stxbp1	Vamp2	5029101	5017153	10090.ENSMUSP00000089051	10090.ENSMUSP00000021273	0	0	0	0	0.148	0.258	1	0.9	1	0.869	1	0.99
Rpl31	Rpl13	5036727	5015324	10090.ENSMUSP00000137631	10090.ENSMUSP00000000756	0	0	0	0	0.824	0.8	1	0.72	1	0.145	1	0.99
Rpl7	Rps9	5026693	5015940	10090.ENSMUSP00000071616	10090.ENSMUSP00000006496	0.119	0	0	0	0.887	0.819	1	0	0	0.544	1	0.99
Rpl31	Rps18	5036727	5016094	10090.ENSMUSP00000137631	10090.ENSMUSP00000008812	0	0	0	0	0.793	0.95	1	0	0	0.154	1	0.99
Rpl38	Rps15	5031605	5026344	10090.ENSMUSP00000102213	10090.ENSMUSP00000069004	0	0	0	0	0.906	0.801	1	0	0	0.518	1	0.99
Cox7c	Cyc1	5033801	5017751	10090.ENSMUSP00000115419	10090.ENSMUSP00000023210	0	0	0	0	0.532	0.743	1	0.9	1	0.305	1	0.99
Cyc1	Cox6c	5017751	5016303	10090.ENSMUSP00000023210	10090.ENSMUSP00000014457	0	0	0	0	0.218	0.815	1	0.9	1	0.37	1	0.989
Rps16	Rpl34	5031918	5028844	10090.ENSMUSP00000103940	10090.ENSMUSP00000086614	0	0	0	0	0.863	0.801	1	0	0	0.656	1	0.989
Psmc3	Psma1	5026606	5020413	10090.ENSMUSP00000071054	10090.ENSMUSP00000033008	0.06	0	0	0	0.766	0.82	1	0	0	0.77	1	0.989
Rps27a	Rpsa	5031143	5021080	10090.ENSMUSP00000099909	10090.ENSMUSP00000035105	0	0	0	0	0.809	0.801	1	0.72	1	0.137	1	0.989
Dlst	Dlat	5025255	5020906	10090.ENSMUSP00000060346	10090.ENSMUSP00000034567	0	0	0.413	0.701	0.489	0.713	1	0.9	1	0.838	1	0.989
Rps20	Rpl4	5034139	5021039	10090.ENSMUSP00000120528	10090.ENSMUSP00000034966	0.139	0	0	0	0.89	0.802	1	0	0	0.497	1	0.989
Rpl6	Rps26	5020043	5018537	10090.ENSMUSP00000031617	10090.ENSMUSP00000026420	0	0	0	0	0.805	0.731	1	0.72	1	0.395	1	0.989
Rps27a	Rpl7	5031143	5026693	10090.ENSMUSP00000099909	10090.ENSMUSP00000071616	0	0	0	0	0.935	0.804	1	0	0	0.166	1	0.988
Cox5b	Uqcrh	5028064	5027699	10090.ENSMUSP00000079944	10090.ENSMUSP00000077744	0	0	0	0	0.745	0.107	1	0.9	1	0.56	1	0.988
Psmd8	Psma1	5023901	5020413	10090.ENSMUSP00000051657	10090.ENSMUSP00000033008	0	0	0	0	0.775	0.886	1	0	0	0.593	1	0.988
Psmb9	Psmb5	5035932	5017622	10090.ENSMUSP00000133499	10090.ENSMUSP00000022803	0	0	0.301	0.728	0.552	0.664	1	0.9	1	0.777	1	0.988
Rpl7	Rps26	5026693	5018537	10090.ENSMUSP00000071616	10090.ENSMUSP00000026420	0	0	0	0	0.912	0.788	1	0	0	0.414	1	0.988
Dlst	Pdhb	5025255	5017460	10090.ENSMUSP00000060346	10090.ENSMUSP00000022268	0.119	0.042	0.307	0	0.338	0.425	1	0.9	1	0.578	1	0.987
Rpl36	Rps26-ps1	5027972	5027499	10090.ENSMUSP00000079340	10090.ENSMUSP00000076447	0	0	0	0	0.528	0.938	1	0	0	0.597	1	0.987
Rps10	Rpl7	5033114	5026693	10090.ENSMUSP00000110532	10090.ENSMUSP00000071616	0	0	0	0	0.857	0.759	1	0	0	0.673	1	0.987
Rps16	Rpl4	5031918	5021039	10090.ENSMUSP00000103940	10090.ENSMUSP00000034966	0	0	0	0	0.881	0.846	1	0	0	0.39	1	0.987
Rps10	Rpl38	5033114	5031605	10090.ENSMUSP00000110532	10090.ENSMUSP00000102213	0	0	0	0	0.847	0.801	1	0	0	0.626	1	0.987
Rps28	Rpl5	5033019	5028222	10090.ENSMUSP00000110013	10090.ENSMUSP00000080854	0	0	0	0	0.857	0.792	1	0	0	0.613	1	0.987
Rps24	Rpl18	5034648	5031793	10090.ENSMUSP00000125977	10090.ENSMUSP00000103365	0	0	0	0	0.839	0.798	1	0	0	0.639	1	0.987
Rpl39	Rpl6	5033187	5020043	10090.ENSMUSP00000110886	10090.ENSMUSP00000031617	0	0	0	0	0.694	0.744	1	0.72	1	0.492	1	0.987
Rps24	Rpl4	5034648	5021039	10090.ENSMUSP00000125977	10090.ENSMUSP00000034966	0	0	0	0	0.887	0.796	1	0	0	0.463	1	0.986
Eif4b	Rps3	5034963	5020408	10090.ENSMUSP00000127774	10090.ENSMUSP00000032998	0	0	0	0	0.784	0.121	1	0.9	1	0.36	1	0.986
Rpl3	Rps17	5028126	5028013	10090.ENSMUSP00000080354	10090.ENSMUSP00000079628	0	0	0	0	0.852	0.819	1	0	0	0.522	1	0.986
Rps17	Rpl13	5028013	5015324	10090.ENSMUSP00000079628	10090.ENSMUSP00000000756	0	0	0	0	0.919	0.795	1	0	0	0.208	1	0.985
Cox7c	Uqcrc2	5033801	5020466	10090.ENSMUSP00000115419	10090.ENSMUSP00000033176	0	0	0	0	0.263	0.721	1	0.9	1	0.363	1	0.985
Rpl7	Rps21	5026693	5024953	10090.ENSMUSP00000071616	10090.ENSMUSP00000058432	0	0	0	0	0.883	0.819	1	0	0	0.379	1	0.985
Rpl5	Rpl36	5028222	5027972	10090.ENSMUSP00000080854	10090.ENSMUSP00000079340	0	0	0	0	0.713	0.736	1	0.54	1	0.643	1	0.985
Rps17	Rpl7	5028013	5026693	10090.ENSMUSP00000079628	10090.ENSMUSP00000071616	0	0	0	0	0.88	0.797	1	0	0	0.467	1	0.985
Rplp2	Rps15	5028293	5026344	10090.ENSMUSP00000081474	10090.ENSMUSP00000069004	0	0	0	0	0.862	0.795	1	0	0	0.534	1	0.985
Rpl4	Rps26	5021039	5018537	10090.ENSMUSP00000034966	10090.ENSMUSP00000026420	0	0	0	0	0.854	0.784	1	0	0	0.548	1	0.984
Uqcrc2	Atp5o	5020466	5017883	10090.ENSMUSP00000033176	10090.ENSMUSP00000023677	0	0	0	0	0.877	0.68	1	0	0	0.625	1	0.984
Rpl5	Rps18	5028222	5016094	10090.ENSMUSP00000080854	10090.ENSMUSP00000008812	0.17	0	0	0	0.816	0.764	1	0	0	0.621	1	0.984
Rpl14	Rps29	5035620	5021660	10090.ENSMUSP00000131489	10090.ENSMUSP00000038352	0.088	0	0	0	0.815	0.786	1	0	0	0.613	1	0.984
Rps10	Rpl13	5033114	5015324	10090.ENSMUSP00000110532	10090.ENSMUSP00000000756	0	0	0	0	0.908	0.741	1	0	0	0.38	1	0.984
Rps15	Rpl4	5026344	5021039	10090.ENSMUSP00000069004	10090.ENSMUSP00000034966	0.139	0	0.2	0	0.845	0.778	1	0	0	0.451	1	0.984
Rps10	Rpl34	5033114	5028844	10090.ENSMUSP00000110532	10090.ENSMUSP00000086614	0	0	0	0	0.855	0.743	1	0	0	0.611	1	0.984
Rps20	Rpl6	5034139	5020043	10090.ENSMUSP00000120528	10090.ENSMUSP00000031617	0.107	0	0	0	0.86	0.734	1	0	0	0.59	1	0.984
Uqcr10	Ndufa4	5024399	5020052	10090.ENSMUSP00000054856	10090.ENSMUSP00000031637	0	0	0	0	0.659	0	0	0.9	1	0.568	1	0.984
Rpl3	Rps15	5028126	5026344	10090.ENSMUSP00000080354	10090.ENSMUSP00000069004	0.139	0	0	0	0.823	0.793	1	0	0	0.536	1	0.983
Rpl36	Rpl7	5027972	5026693	10090.ENSMUSP00000079340	10090.ENSMUSP00000071616	0	0	0	0	0.775	0.746	1	0.54	1	0.442	1	0.983
Uqcrc2	Cox6c	5020466	5016303	10090.ENSMUSP00000033176	10090.ENSMUSP00000014457	0	0	0	0	0.26	0.663	1	0.9	1	0.433	1	0.983
Rps24	Rplp2	5034648	5028293	10090.ENSMUSP00000125977	10090.ENSMUSP00000081474	0	0	0	0	0.846	0.731	1	0	0	0.628	1	0.983
Rpsa	Rpl19	5021080	5016512	10090.ENSMUSP00000035105	10090.ENSMUSP00000017548	0	0	0.251	0	0.846	0.801	1	0	0	0.311	1	0.982
Rps26	Rpl13	5018537	5015324	10090.ENSMUSP00000026420	10090.ENSMUSP00000000756	0	0	0	0	0.922	0.741	1	0	0	0.184	1	0.982
Rps28	Rpl7	5033019	5026693	10090.ENSMUSP00000110013	10090.ENSMUSP00000071616	0	0	0	0	0.857	0.783	1	0	0	0.481	1	0.982
Rpl14	Rps10	5035620	5033114	10090.ENSMUSP00000131489	10090.ENSMUSP00000110532	0	0	0	0	0.813	0.755	1	0	0	0.652	1	0.982
Rps26-ps1	Rpl6	5027499	5020043	10090.ENSMUSP00000076447	10090.ENSMUSP00000031617	0	0	0	0	0.67	0.731	1	0.72	1	0.395	1	0.982
Uqcrh	Ndufa4	5027699	5020052	10090.ENSMUSP00000077744	10090.ENSMUSP00000031637	0	0	0	0	0.582	0	0	0.9	1	0.625	1	0.982
Rps29	Rpl13	5021660	5015324	10090.ENSMUSP00000038352	10090.ENSMUSP00000000756	0	0	0	0	0.874	0.737	1	0	0	0.519	1	0.982
Dlst	Pdhx	5025255	5016207	10090.ENSMUSP00000060346	10090.ENSMUSP00000011058	0	0	0.429	0.673	0.558	0.448	1	0.9	1	0.597	1	0.981
Rps24	Rpl6	5034648	5020043	10090.ENSMUSP00000125977	10090.ENSMUSP00000031617	0	0	0	0	0.836	0.734	1	0	0	0.599	1	0.981
Vps26a	Vps26b	5029211	5020872	10090.ENSMUSP00000090130	10090.ENSMUSP00000034470	0	0	0	0.97	0.06	0.815	1	0.9	1	0.886	1	0.981
Rpl5	Rpsa	5028222	5021080	10090.ENSMUSP00000080854	10090.ENSMUSP00000035105	0.158	0	0	0	0.792	0.784	1	0	0	0.536	1	0.98
Rps20	Rplp2	5034139	5028293	10090.ENSMUSP00000120528	10090.ENSMUSP00000081474	0	0	0	0	0.843	0.806	1	0	0	0.413	1	0.98
Rpl18	Rpsa	5031793	5021080	10090.ENSMUSP00000103365	10090.ENSMUSP00000035105	0.17	0	0	0	0.823	0.796	1	0	0	0.418	1	0.98
Rps16	Rpl13	5031918	5015324	10090.ENSMUSP00000103940	10090.ENSMUSP00000000756	0	0	0	0	0.867	0.801	1	0	0	0.332	1	0.98
Rpl36	Rpsa	5027972	5021080	10090.ENSMUSP00000079340	10090.ENSMUSP00000035105	0	0	0	0	0.612	0.934	1	0	0	0.264	1	0.979
Rps27a	Psma5	5031143	5028998	10090.ENSMUSP00000099909	10090.ENSMUSP00000088057	0	0	0	0	0.18	0.75	1	0.9	1	0.121	1	0.979
Rpl14	Rps26	5035620	5018537	10090.ENSMUSP00000131489	10090.ENSMUSP00000026420	0	0	0	0	0.816	0.798	1	0	0	0.492	1	0.979
Syt1	Stxbp1	5031362	5029101	10090.ENSMUSP00000100912	10090.ENSMUSP00000089051	0	0	0	0	0.224	0.06	1	0.9	1	0.757	1	0.979
Rps15	Rpl6	5026344	5020043	10090.ENSMUSP00000069004	10090.ENSMUSP00000031617	0.107	0	0	0	0.788	0.728	1	0	0	0.651	1	0.979
Rplp2	Rps26	5028293	5018537	10090.ENSMUSP00000081474	10090.ENSMUSP00000026420	0	0	0	0	0.862	0.8	1	0	0	0.29	1	0.978
Rps10	Rplp2	5033114	5028293	10090.ENSMUSP00000110532	10090.ENSMUSP00000081474	0	0	0	0	0.85	0.777	1	0	0	0.411	1	0.978
Rpl3	Rpsa	5028126	5021080	10090.ENSMUSP00000080354	10090.ENSMUSP00000035105	0.101	0	0	0	0.822	0.781	1	0	0	0.468	1	0.978
Rps20	Rpl13	5034139	5015324	10090.ENSMUSP00000120528	10090.ENSMUSP00000000756	0	0	0	0	0.832	0.799	1	0	0	0.39	1	0.977
Rpl3	Rps26	5028126	5018537	10090.ENSMUSP00000080354	10090.ENSMUSP00000026420	0	0	0	0	0.819	0.796	1	0	0	0.428	1	0.977
Cox5b	Atp5o	5028064	5017883	10090.ENSMUSP00000079944	10090.ENSMUSP00000023677	0	0	0	0	0.901	0	0	0	0	0.784	1	0.977
Rpl34	Rps29	5028844	5021660	10090.ENSMUSP00000086614	10090.ENSMUSP00000038352	0.139	0	0	0	0.878	0.801	1	0	0	0	0	0.977
Rps27a	Psmc2	5031143	5019763	10090.ENSMUSP00000099909	10090.ENSMUSP00000030769	0	0	0	0	0.098	0.72	1	0.9	1	0.201	1	0.977
Rpl34	Rps15	5028844	5026344	10090.ENSMUSP00000086614	10090.ENSMUSP00000069004	0.164	0	0	0	0.86	0.742	1	0	0	0.346	1	0.977
Uqcrfs1	Ndufa4	5022838	5020052	10090.ENSMUSP00000045284	10090.ENSMUSP00000031637	0	0	0	0	0.579	0.079	1	0.9	1	0.465	1	0.976
Rpl7	Rpsa	5026693	5021080	10090.ENSMUSP00000071616	10090.ENSMUSP00000035105	0.042	0	0	0	0.819	0.752	1	0	0	0.513	1	0.976
Rps26-ps1	Rpl4	5027499	5021039	10090.ENSMUSP00000076447	10090.ENSMUSP00000034966	0	0	0	0	0.778	0.784	1	0	0	0.548	1	0.976
Rpl14	Rpsa	5035620	5021080	10090.ENSMUSP00000131489	10090.ENSMUSP00000035105	0	0	0	0	0.808	0.757	1	0	0	0.526	1	0.976
Rps10	Rpl3	5033114	5028126	10090.ENSMUSP00000110532	10090.ENSMUSP00000080354	0	0	0	0	0.808	0.79	1	0	0	0.443	1	0.975
Rpl14	Rps26-ps1	5035620	5027499	10090.ENSMUSP00000131489	10090.ENSMUSP00000076447	0	0	0	0	0.778	0.798	1	0	0	0.492	1	0.975
Rps29	Rpl4	5021660	5021039	10090.ENSMUSP00000038352	10090.ENSMUSP00000034966	0.113	0	0	0	0.792	0.736	1	0	0	0.558	1	0.975
Snap25	Syn2	5019145	5016134	10090.ENSMUSP00000028727	10090.ENSMUSP00000009538	0	0	0	0	0.247	0.197	1	0.9	1	0.622	1	0.974
Eif4b	Rps25	5034963	5027947	10090.ENSMUSP00000127774	10090.ENSMUSP00000079180	0	0	0	0	0.082	0.664	1	0.9	1	0.278	1	0.974
Uqcrq	Ndufa4	5024138	5020052	10090.ENSMUSP00000053145	10090.ENSMUSP00000031637	0	0	0	0	0.657	0.079	1	0.9	1	0.298	1	0.974
Dlat	Pdhx	5020906	5016207	10090.ENSMUSP00000034567	10090.ENSMUSP00000011058	0	0	0.445	0.868	0.116	0.686	1	0.9	1	0.702	1	0.974
Rpl34	Rps26	5028844	5018537	10090.ENSMUSP00000086614	10090.ENSMUSP00000026420	0	0	0	0	0.896	0.742	1	0	0	0.127	1	0.974
Rps24	Rpl13	5034648	5015324	10090.ENSMUSP00000125977	10090.ENSMUSP00000000756	0	0	0	0	0.86	0.734	1	0	0	0.314	1	0.972
Uqcrc2	Ndufa4	5020466	5020052	10090.ENSMUSP00000033176	10090.ENSMUSP00000031637	0	0	0	0	0.233	0.079	1	0.9	1	0.655	1	0.972
Rps20	Rpl34	5034139	5028844	10090.ENSMUSP00000120528	10090.ENSMUSP00000086614	0	0	0	0	0.825	0.801	1	0	0	0.284	1	0.972
Eif4b	Rps23	5034963	5024346	10090.ENSMUSP00000127774	10090.ENSMUSP00000054490	0	0	0	0	0.148	0.664	1	0.9	1	0.135	1	0.971
Rpl3	Rps26-ps1	5028126	5027499	10090.ENSMUSP00000080354	10090.ENSMUSP00000076447	0	0	0	0	0.776	0.796	1	0	0	0.428	1	0.971
Rpl38	Rpsa	5031605	5021080	10090.ENSMUSP00000102213	10090.ENSMUSP00000035105	0	0	0	0	0.805	0.801	1	0	0	0.303	1	0.97
Eif4b	Rps14	5034963	5018277	10090.ENSMUSP00000127774	10090.ENSMUSP00000025511	0	0	0	0	0.155	0.663	1	0.9	1	0.071	1	0.97
Rps10	Rpl6	5033114	5020043	10090.ENSMUSP00000110532	10090.ENSMUSP00000031617	0	0	0	0	0.704	0.706	1	0	0	0.686	1	0.97
Rps10	Rpl4	5033114	5021039	10090.ENSMUSP00000110532	10090.ENSMUSP00000034966	0	0	0	0	0.809	0.765	1	0	0	0.383	1	0.97
Rps26-ps1	Rpl7	5027499	5026693	10090.ENSMUSP00000076447	10090.ENSMUSP00000071616	0	0	0	0	0.774	0.788	1	0	0	0.414	1	0.969
Eif4b	Rps13	5034963	5034698	10090.ENSMUSP00000127774	10090.ENSMUSP00000126294	0	0	0	0	0.082	0.664	1	0.9	1	0.093	1	0.968
Eif4b	Rps9	5034963	5015940	10090.ENSMUSP00000127774	10090.ENSMUSP00000006496	0	0	0	0	0.092	0.664	1	0.9	1	0.078	1	0.968
Rplp2	Rpsa	5028293	5021080	10090.ENSMUSP00000081474	10090.ENSMUSP00000035105	0	0	0	0	0.807	0.762	1	0	0	0.364	1	0.968
Eif4b	Rps15a	5034963	5034103	10090.ENSMUSP00000127774	10090.ENSMUSP00000119975	0	0	0	0	0.091	0.664	1	0.9	1	0.071	1	0.967
Rps15	Rpl13	5026344	5015324	10090.ENSMUSP00000069004	10090.ENSMUSP00000000756	0	0	0	0	0.828	0.721	1	0	0	0.382	1	0.967
Rps27a	Psma4	5031143	5020992	10090.ENSMUSP00000099909	10090.ENSMUSP00000034848	0	0	0	0	0.153	0.608	1	0.9	1	0.103	1	0.966
Rpsa	Rpl4	5021080	5021039	10090.ENSMUSP00000035105	10090.ENSMUSP00000034966	0.113	0	0	0	0.815	0.748	1	0	0	0.285	1	0.966
Rplp2	Rps26-ps1	5028293	5027499	10090.ENSMUSP00000081474	10090.ENSMUSP00000076447	0	0	0	0	0.775	0.8	1	0	0	0.29	1	0.965
Atp5d	Cyc1	5031383	5017751	10090.ENSMUSP00000101006	10090.ENSMUSP00000023210	0	0	0	0	0.923	0.222	1	0	0	0.431	1	0.962
Eif4b	Rps28	5034963	5033019	10090.ENSMUSP00000127774	10090.ENSMUSP00000110013	0	0	0	0	0.062	0.605	1	0.9	1	0.089	1	0.961
Atp5o	Cox5a	5017883	5015244	10090.ENSMUSP00000023677	10090.ENSMUSP00000000090	0	0	0	0	0.878	0.05	1	0	0	0.686	1	0.96
Vamp2	Syn2	5017153	5016134	10090.ENSMUSP00000021273	10090.ENSMUSP00000009538	0	0	0	0	0.162	0	0	0.9	1	0.549	1	0.958
Atp5e	Cox6c	5016447	5016303	10090.ENSMUSP00000016396	10090.ENSMUSP00000014457	0	0	0	0	0.942	0	0	0	0	0.277	1	0.956
Atp5d	Cox5b	5031383	5028064	10090.ENSMUSP00000101006	10090.ENSMUSP00000079944	0	0	0	0	0.884	0	0	0	0	0.639	1	0.956
Atp5f1	Cox5a	5033489	5015244	10090.ENSMUSP00000113022	10090.ENSMUSP00000000090	0	0	0	0	0.87	0	0	0	0	0.669	1	0.955
Rpsa	Rpl13	5021080	5015324	10090.ENSMUSP00000035105	10090.ENSMUSP00000000756	0	0	0	0	0.809	0.732	1	0	0	0.192	1	0.955
Psma2	Rps27a	5035328	5031143	10090.ENSMUSP00000129767	10090.ENSMUSP00000099909	0	0	0	0	0.257	0.44	1	0.9	1	0	0	0.954
Atp5o	Cyc1	5017883	5017751	10090.ENSMUSP00000023677	10090.ENSMUSP00000023210	0	0	0	0	0.874	0.179	1	0	0	0.591	1	0.954
Syt1	Sh3gl2	5031362	5019615	10090.ENSMUSP00000100912	10090.ENSMUSP00000030212	0	0	0	0	0.256	0	0	0.9	1	0.426	1	0.953
Eif4b	Rps18	5034963	5016094	10090.ENSMUSP00000127774	10090.ENSMUSP00000008812	0	0	0	0	0.062	0.491	1	0.9	1	0.126	1	0.952
Rps6	Eif4g1	5031125	5023251	10090.ENSMUSP00000099878	10090.ENSMUSP00000047678	0	0	0	0	0.097	0	0	0.9	1	0.511	1	0.952
H2afz	Cbx3	5021406	5020121	10090.ENSMUSP00000036907	10090.ENSMUSP00000031862	0	0	0	0	0.185	0.227	1	0.9	1	0.319	1	0.951
Atp5j2	Uqcrh	5034574	5027699	10090.ENSMUSP00000125504	10090.ENSMUSP00000077744	0	0	0	0	0.899	0	0	0	0	0.539	1	0.951
Eif4b	Rps11	5034963	5015656	10090.ENSMUSP00000127774	10090.ENSMUSP00000003521	0	0	0	0	0.414	0.231	1	0.9	1	0.049	1	0.951
Psma3	Rps27a	5034579	5031143	10090.ENSMUSP00000125548	10090.ENSMUSP00000099909	0	0	0	0	0.163	0.439	1	0.9	1	0.075	1	0.95
Cox7c	Atp5e	5033801	5016447	10090.ENSMUSP00000115419	10090.ENSMUSP00000016396	0	0	0	0	0.92	0	0	0	0	0.408	1	0.95
Rpl3	Rps29	5028126	5021660	10090.ENSMUSP00000080354	10090.ENSMUSP00000038352	0.113	0	0	0	0.696	0.724	1	0	0	0.415	1	0.95
Atp5d	Cox5a	5031383	5015244	10090.ENSMUSP00000101006	10090.ENSMUSP00000000090	0	0	0	0	0.842	0.199	1	0	0	0.636	1	0.95
Uqcrfs1	Atp5o	5022838	5017883	10090.ENSMUSP00000045284	10090.ENSMUSP00000023677	0	0	0	0	0.834	0	0	0	0	0.701	1	0.948
Rpsa	Rpl6	5021080	5020043	10090.ENSMUSP00000035105	10090.ENSMUSP00000031617	0	0	0	0	0.731	0.707	1	0	0	0.402	1	0.948
Uqcrh	Atp5e	5027699	5016447	10090.ENSMUSP00000077744	10090.ENSMUSP00000016396	0	0	0	0	0.895	0	0	0	0	0.528	1	0.948
Atp5j2	Cox5a	5034574	5015244	10090.ENSMUSP00000125504	10090.ENSMUSP00000000090	0	0	0	0	0.873	0.138	1	0	0	0.557	1	0.947
Atp5f1	Uqcrc2	5033489	5020466	10090.ENSMUSP00000113022	10090.ENSMUSP00000033176	0	0	0	0	0.875	0	0	0	0	0.572	1	0.944
Uqcrq	Atp5k	5024138	5023828	10090.ENSMUSP00000053145	10090.ENSMUSP00000051222	0	0	0	0	0.844	0	0	0	0	0.651	1	0.943
Rps26-ps1	Rps26	5027499	5018537	10090.ENSMUSP00000076447	10090.ENSMUSP00000026420	0	0	0.449	0.984	0	0.8	1	0.72	1	0	0	0.942
Rps27a	Psmb2	5031143	5019726	10090.ENSMUSP00000099909	10090.ENSMUSP00000030642	0	0	0	0	0.108	0.209	1	0.9	1	0.266	1	0.941
Atp5j2	Uqcrq	5034574	5024138	10090.ENSMUSP00000125504	10090.ENSMUSP00000053145	0	0	0	0	0.858	0.197	1	0	0	0.53	1	0.941
Rps27a	Psmc3	5031143	5026606	10090.ENSMUSP00000099909	10090.ENSMUSP00000071054	0	0	0	0	0.108	0.263	1	0.9	1	0.215	1	0.941
Cox7c	Atp5d	5033801	5031383	10090.ENSMUSP00000115419	10090.ENSMUSP00000101006	0	0	0	0	0.812	0	0	0	0	0.702	1	0.941
Rps27a	Psmb4	5031143	5015885	10090.ENSMUSP00000099909	10090.ENSMUSP00000005923	0	0	0	0	0.233	0.257	1	0.9	1	0.082	1	0.94
Atp5j2	Cox6c	5034574	5016303	10090.ENSMUSP00000125504	10090.ENSMUSP00000014457	0	0	0	0	0.905	0	0	0	0	0.394	1	0.94
Atp5j	Cox5a	5017869	5015244	10090.ENSMUSP00000023608	10090.ENSMUSP00000000090	0	0	0	0	0.865	0	0	0	0	0.578	1	0.94
Rps27a	Psma6	5031143	5017199	10090.ENSMUSP00000099909	10090.ENSMUSP00000021412	0	0	0	0	0.19	0.209	1	0.9	1	0.185	1	0.94
Cox7c	Ndufa4	5033801	5020052	10090.ENSMUSP00000115419	10090.ENSMUSP00000031637	0	0	0	0	0.683	0.079	1	0.54	1	0.601	1	0.939
Eif4b	Rps5	5034963	5015759	10090.ENSMUSP00000127774	10090.ENSMUSP00000004554	0	0	0	0	0.192	0.18	1	0.9	1	0.195	1	0.939
Uqcrq	Atp5e	5024138	5016447	10090.ENSMUSP00000053145	10090.ENSMUSP00000016396	0	0	0	0	0.908	0	0	0	0	0.359	1	0.938
Atp5j2	Cox7c	5034574	5033801	10090.ENSMUSP00000125504	10090.ENSMUSP00000115419	0	0	0	0	0.899	0	0	0	0	0.415	1	0.938
Syn2	Stx1a	5016134	5015843	10090.ENSMUSP00000009538	10090.ENSMUSP00000005509	0	0	0	0	0.125	0	0	0.9	1	0.342	1	0.937
Rps27a	Psmd8	5031143	5023901	10090.ENSMUSP00000099909	10090.ENSMUSP00000051657	0	0	0	0	0.099	0.32	1	0.9	1	0.088	1	0.936
Rpl34	Rpsa	5028844	5021080	10090.ENSMUSP00000086614	10090.ENSMUSP00000035105	0	0	0	0	0.711	0.742	1	0	0	0.203	1	0.935
Rps27a	Psma7	5031143	5019262	10090.ENSMUSP00000099909	10090.ENSMUSP00000029082	0	0	0	0	0.229	0.209	1	0.9	1	0.059	1	0.934
Atp5j2	Uqcr10	5034574	5024399	10090.ENSMUSP00000125504	10090.ENSMUSP00000054856	0	0	0	0	0.873	0	0	0	0	0.492	1	0.933
H2afz	Lmnb1	5021406	5018269	10090.ENSMUSP00000036907	10090.ENSMUSP00000025486	0	0	0	0	0.113	0.045	1	0.9	1	0.293	1	0.932
[truncated: 100 more rows]
