# Supplementary material for: Manganese-induced neurotoxicity in cerebellar granule neurons due to perturbation of cell network pathways with potential implications for neurodegenerative disorders
Source: Royal Society of Chemistry journal article supplement (doi:10.1039/d0mt00085j), 2020-07-21
Supplement: d0mt00085j5.xlsx [file d0mt00085j5.xlsx]

## Sheet: CELL PROCESSES - PATHWAYS
CELL PROCESSES	PATHWAYS	OBSERVED GENES	FDR
METABOLISM OF PROTEINS	Ribosome	55	8.32e-76		ENSMUSP00000003521	ENSMUSP00000004072	ENSMUSP00000004554	ENSMUSP00000006496	ENSMUSP00000008812	ENSMUSP00000017548	ENSMUSP00000025511	ENSMUSP00000029722	ENSMUSP00000031617	ENSMUSP00000032998	ENSMUSP00000034966	ENSMUSP00000038352	ENSMUSP00000046506	ENSMUSP00000048469	ENSMUSP00000054490	ENSMUSP00000058432	ENSMUSP00000058919	ENSMUSP00000071616	ENSMUSP00000073175	ENSMUSP00000073880	ENSMUSP00000079163	ENSMUSP00000079180	ENSMUSP00000079340	ENSMUSP00000079628	ENSMUSP00000080354	ENSMUSP00000080523	ENSMUSP00000080854	ENSMUSP00000081474	ENSMUSP00000086614	ENSMUSP00000092502	ENSMUSP00000095287	ENSMUSP00000099435	ENSMUSP00000099595	ENSMUSP00000099757	ENSMUSP00000099878	ENSMUSP00000099909	ENSMUSP00000102213	ENSMUSP00000103365	ENSMUSP00000103940	ENSMUSP00000104067	ENSMUSP00000106014	ENSMUSP00000108837	ENSMUSP00000110013	ENSMUSP00000110532	ENSMUSP00000110731
	Metabolism of RNA	38	5.2e-27		ENSMUSP00000003521	ENSMUSP00000006496	ENSMUSP00000008812	ENSMUSP00000017365	ENSMUSP00000017572	ENSMUSP00000021049	ENSMUSP00000021063	ENSMUSP00000021595	ENSMUSP00000022256	ENSMUSP00000022380	ENSMUSP00000025511	ENSMUSP00000026560	ENSMUSP00000027432	ENSMUSP00000028278	ENSMUSP00000029722	ENSMUSP00000032824	ENSMUSP00000032998	ENSMUSP00000037613	ENSMUSP00000038580	ENSMUSP00000041968	ENSMUSP00000051657	ENSMUSP00000054490	ENSMUSP00000058432	ENSMUSP00000073880	ENSMUSP00000076989	ENSMUSP00000079180	ENSMUSP00000086640	ENSMUSP00000092502	ENSMUSP00000099933	ENSMUSP00000103940	ENSMUSP00000110013	ENSMUSP00000110532	ENSMUSP00000119975	ENSMUSP00000120096	ENSMUSP00000120528	ENSMUSP00000126294	ENSMUSP00000132102	ENSMUSP00000140250	Fbl	Hnrnph1	Nop58	Ppp2r2a	Psmc1	Psmc4	Psmc5
	Formation of a pool of free 40S subunits	18	7.69e-24		ENSMUSP00000003521	ENSMUSP00000006496	ENSMUSP00000008812	ENSMUSP00000025511	ENSMUSP00000029722	ENSMUSP00000032998	ENSMUSP00000054490	ENSMUSP00000058432	ENSMUSP00000073880	ENSMUSP00000079180	ENSMUSP00000092502	ENSMUSP00000103940	ENSMUSP00000110013	ENSMUSP00000110532	ENSMUSP00000119975	ENSMUSP00000120528	ENSMUSP00000126294	ENSMUSP00000132102	Rps10	Rps11	Rps13	Rps14	Rps15a	Rps16	Rps18	Rps2	Rps20	Rps21	Rps23	Rps25	Rps27	Rps28	Rps3	Rps3a1	Rps7	Rps9
	Formation of the ternary complex and subsequently the 43S complex	18	1.57e-23		ENSMUSP00000003521	ENSMUSP00000006496	ENSMUSP00000008812	ENSMUSP00000025511	ENSMUSP00000029722	ENSMUSP00000032998	ENSMUSP00000054490	ENSMUSP00000058432	ENSMUSP00000073880	ENSMUSP00000079180	ENSMUSP00000092502	ENSMUSP00000103940	ENSMUSP00000110013	ENSMUSP00000110532	ENSMUSP00000119975	ENSMUSP00000120528	ENSMUSP00000126294	ENSMUSP00000132102	Rps10	Rps11	Rps13	Rps14	Rps15a	Rps16	Rps18	Rps2	Rps20	Rps21	Rps23	Rps25	Rps27	Rps28	Rps3	Rps3a1	Rps7	Rps9
	Ribosomal scanning and start codon recognition	18	9.13e-23		ENSMUSP00000003521	ENSMUSP00000006496	ENSMUSP00000008812	ENSMUSP00000025511	ENSMUSP00000029722	ENSMUSP00000032998	ENSMUSP00000054490	ENSMUSP00000058432	ENSMUSP00000073880	ENSMUSP00000079180	ENSMUSP00000092502	ENSMUSP00000103940	ENSMUSP00000110013	ENSMUSP00000110532	ENSMUSP00000119975	ENSMUSP00000120528	ENSMUSP00000126294	ENSMUSP00000132102	Rps10	Rps11	Rps13	Rps14	Rps15a	Rps16	Rps18	Rps2	Rps20	Rps21	Rps23	Rps25	Rps27	Rps28	Rps3	Rps3a1	Rps7	Rps9
	Translation initiation complex formation	18	1.37e-22		ENSMUSP00000003521	ENSMUSP00000006496	ENSMUSP00000008812	ENSMUSP00000025511	ENSMUSP00000029722	ENSMUSP00000032998	ENSMUSP00000054490	ENSMUSP00000058432	ENSMUSP00000073880	ENSMUSP00000079180	ENSMUSP00000092502	ENSMUSP00000103940	ENSMUSP00000110013	ENSMUSP00000110532	ENSMUSP00000119975	ENSMUSP00000120528	ENSMUSP00000126294	ENSMUSP00000132102	Rps10	Rps11	Rps13	Rps14	Rps15a	Rps16	Rps18	Rps2	Rps20	Rps21	Rps23	Rps25	Rps27	Rps28	Rps3	Rps3a1	Rps7	Rps9
	L13a-mediated translational silencing of Ceruloplasmin expression	18	1.8e-22		ENSMUSP00000003521	ENSMUSP00000006496	ENSMUSP00000008812	ENSMUSP00000025511	ENSMUSP00000029722	ENSMUSP00000032998	ENSMUSP00000054490	ENSMUSP00000058432	ENSMUSP00000073880	ENSMUSP00000079180	ENSMUSP00000092502	ENSMUSP00000103940	ENSMUSP00000110013	ENSMUSP00000110532	ENSMUSP00000119975	ENSMUSP00000120528	ENSMUSP00000126294	ENSMUSP00000132102	Rps10	Rps11	Rps13	Rps14	Rps15a	Rps16	Rps18	Rps2	Rps20	Rps21	Rps23	Rps25	Rps27	Rps28	Rps3	Rps3a1	Rps7	Rps9
	Major pathway of rRNA processing in the nucleolus and cytosol	21	4.74e-22		ENSMUSP00000003521	ENSMUSP00000006496	ENSMUSP00000008812	ENSMUSP00000025511	ENSMUSP00000029722	ENSMUSP00000032998	ENSMUSP00000037613	ENSMUSP00000038580	ENSMUSP00000054490	ENSMUSP00000058432	ENSMUSP00000073880	ENSMUSP00000079180	ENSMUSP00000092502	ENSMUSP00000103940	ENSMUSP00000110013	ENSMUSP00000110532	ENSMUSP00000119975	ENSMUSP00000120528	ENSMUSP00000126294	ENSMUSP00000132102	ENSMUSP00000140250	Fbl	Nop58	Rps10	Rps11	Rps13	Rps14	Rps15a	Rps16	Rps18	Rps2	Rps20	Rps21	Rps23	Rps25	Rps27	Rps28	Rps3	Rps3a1	Rps7	Rps9	Rrp9
	Proteasome	14	3.11e-17		ENSMUSP00000017365	ENSMUSP00000017572	ENSMUSP00000021049	ENSMUSP00000021063	ENSMUSP00000021595	ENSMUSP00000022256	ENSMUSP00000022380	ENSMUSP00000026560	ENSMUSP00000027432	ENSMUSP00000028278	ENSMUSP00000030769	ENSMUSP00000032824	ENSMUSP00000041968	ENSMUSP00000051657	Psmc1	Psmc2	Psmc4	Psmc5	Psmc6	Psmd1	Psmd11	Psmd12	Psmd13	Psmd14	Psmd3	Psmd6	Psmd7	Psmd8
	Metabolism of proteins	47	1.06e-17		ENSMUSP00000003521	ENSMUSP00000003912	ENSMUSP00000006496	ENSMUSP00000008812	ENSMUSP00000017365	ENSMUSP00000017572	ENSMUSP00000019638	ENSMUSP00000021049	ENSMUSP00000021063	ENSMUSP00000021595	ENSMUSP00000022256	ENSMUSP00000022380	ENSMUSP00000025511	ENSMUSP00000025645	ENSMUSP00000026560	ENSMUSP00000027050	ENSMUSP00000027432	ENSMUSP00000028278	ENSMUSP00000028681	ENSMUSP00000028683	ENSMUSP00000028826	ENSMUSP00000029722	ENSMUSP00000031779	ENSMUSP00000032824	ENSMUSP00000032998	ENSMUSP00000034588	ENSMUSP00000036696	ENSMUSP00000041968	ENSMUSP00000048416	ENSMUSP00000051657	ENSMUSP00000054490	ENSMUSP00000057543	ENSMUSP00000058432	ENSMUSP00000068971	ENSMUSP00000073880	ENSMUSP00000079180	ENSMUSP00000092502	ENSMUSP00000103940	ENSMUSP00000110013	ENSMUSP00000110532	ENSMUSP00000119975	ENSMUSP00000120096	ENSMUSP00000120528	ENSMUSP00000120904	ENSMUSP00000126294
	Ubiquitin-dependent degradation of Cyclin D1	14	7.63e-17		ENSMUSP00000017365	ENSMUSP00000017572	ENSMUSP00000021049	ENSMUSP00000021063	ENSMUSP00000021595	ENSMUSP00000022256	ENSMUSP00000022380	ENSMUSP00000026560	ENSMUSP00000027432	ENSMUSP00000028278	ENSMUSP00000032824	ENSMUSP00000041968	ENSMUSP00000051657	ENSMUSP00000120096	Psmc1	Psmc4	Psmc5	Psmc6	Psmd1	Psmd11	Psmd12	Psmd13	Psmd14	Psmd3	Psmd6	Psmd7	Psmd8	Uba52
	Metabolism of polyamines	15	7.2e-16		ENSMUSP00000003947	ENSMUSP00000017365	ENSMUSP00000017572	ENSMUSP00000021049	ENSMUSP00000021063	ENSMUSP00000021595	ENSMUSP00000022256	ENSMUSP00000022380	ENSMUSP00000026560	ENSMUSP00000027432	ENSMUSP00000028278	ENSMUSP00000032824	ENSMUSP00000041968	ENSMUSP00000051657	ENSMUSP00000078132	Nmral1	Nqo1	Psmc1	Psmc4	Psmc5	Psmc6	Psmd1	Psmd11	Psmd12	Psmd13	Psmd14	Psmd3	Psmd6	Psmd7	Psmd8
	Metabolism of amino acids and derivatives	16	4.06e-11		ENSMUSP00000003947	ENSMUSP00000017365	ENSMUSP00000017572	ENSMUSP00000021049	ENSMUSP00000021063	ENSMUSP00000021595	ENSMUSP00000022256	ENSMUSP00000022380	ENSMUSP00000026560	ENSMUSP00000027432	ENSMUSP00000028278	ENSMUSP00000032824	ENSMUSP00000033157	ENSMUSP00000041968	ENSMUSP00000051657	ENSMUSP00000078132	Ndufab1	Nmral1	Nqo1	Psmc1	Psmc4	Psmc5	Psmc6	Psmd1	Psmd11	Psmd12	Psmd13	Psmd14	Psmd3	Psmd6	Psmd7	Psmd8
	Post-translational protein modification	29	1.34e-08		ENSMUSP00000003912	ENSMUSP00000017365	ENSMUSP00000017572	ENSMUSP00000019638	ENSMUSP00000021049	ENSMUSP00000021063	ENSMUSP00000021595	ENSMUSP00000022256	ENSMUSP00000022380	ENSMUSP00000025645	ENSMUSP00000026560	ENSMUSP00000027050	ENSMUSP00000027432	ENSMUSP00000028278	ENSMUSP00000028681	ENSMUSP00000028683	ENSMUSP00000028826	ENSMUSP00000031779	ENSMUSP00000032824	ENSMUSP00000034588	ENSMUSP00000036696	ENSMUSP00000041968	ENSMUSP00000048416	ENSMUSP00000051657	ENSMUSP00000068971	ENSMUSP00000092502	ENSMUSP00000120096	ENSMUSP00000120904	ENSMUSP00000140250	Apoa1	Calr	Calu	Chgb	Cops4	Cops5	Cops6	F2	Gmds	Nop58	Pdia3	Psmc1	Psmc4	Psmc5	Psmc6	Psmd1
	N-glycan trimming in the ER and Calnexin/Calreticulin cycle	4	0.00026		ENSMUSP00000003912	ENSMUSP00000021595	ENSMUSP00000028683	ENSMUSP00000120096	Calr	Pdia3	Psmc1	Uba52
	Post-translational protein phosphorylation	5	0.0039		ENSMUSP00000025645	ENSMUSP00000028826	ENSMUSP00000031779	ENSMUSP00000034588	ENSMUSP00000068971	Apoa1	Calu	Chgb	Serpinc1	Tmem132a
	Ribosome biogenesis in eukaryotes	4	0.0178		ENSMUSP00000033776	ENSMUSP00000037613	ENSMUSP00000099933	ENSMUSP00000140250	Dkc1	Fbl	Nop58	Xpo1
CELL METABOLISM	Oxidative phosphorylation	23	3.78e-23		ENSMUSP00000000090	ENSMUSP00000005647	ENSMUSP00000013737	ENSMUSP00000014457	ENSMUSP00000022286	ENSMUSP00000022980	ENSMUSP00000023085	ENSMUSP00000023210	ENSMUSP00000026222	ENSMUSP00000027111	ENSMUSP00000027478	ENSMUSP00000033157	ENSMUSP00000033176	ENSMUSP00000042967	ENSMUSP00000043543	ENSMUSP00000065352	ENSMUSP00000074600	ENSMUSP00000079944	ENSMUSP00000085523	ENSMUSP00000101003	ENSMUSP00000105796	ENSMUSP00000121557	ENSMUSP00000136313	Cox5a	Cox5b	Cox6c	Cyc1	Ndufa10	Ndufa12	Ndufa13	Ndufa6	Ndufa8	Ndufa9	Ndufab1	Ndufb10	Ndufb8	Ndufb9	Ndufs1	Ndufs2	Ndufs3	Ndufs4	Ndufs7	Ndufs8	Ndufv1	Ndufv2
	Metabolic pathways	25	2.7e-05		ENSMUSP00000000090	ENSMUSP00000005647	ENSMUSP00000013737	ENSMUSP00000014457	ENSMUSP00000022286	ENSMUSP00000022980	ENSMUSP00000023085	ENSMUSP00000023210	ENSMUSP00000026222	ENSMUSP00000027111	ENSMUSP00000027478	ENSMUSP00000033157	ENSMUSP00000033176	ENSMUSP00000036696	ENSMUSP00000042967	ENSMUSP00000043543	ENSMUSP00000045841	ENSMUSP00000065352	ENSMUSP00000074600	ENSMUSP00000079944	ENSMUSP00000085523	ENSMUSP00000101003	ENSMUSP00000105796	ENSMUSP00000121557	ENSMUSP00000136313	Cox5a	Cox5b	Cox6c	Cyc1	Eprs	Gmds	Ndufa10	Ndufa12	Ndufa13	Ndufa6	Ndufa8	Ndufa9	Ndufab1	Ndufb10	Ndufb8	Ndufb9	Ndufs1	Ndufs2	Ndufs3	Ndufs4
	Complex I biogenesis	17	7.49e-21		ENSMUSP00000005647	ENSMUSP00000013737	ENSMUSP00000022980	ENSMUSP00000023085	ENSMUSP00000026222	ENSMUSP00000027111	ENSMUSP00000027478	ENSMUSP00000033157	ENSMUSP00000042967	ENSMUSP00000043543	ENSMUSP00000065352	ENSMUSP00000074600	ENSMUSP00000085523	ENSMUSP00000101003	ENSMUSP00000105796	ENSMUSP00000121557	ENSMUSP00000136313	Ndufa10	Ndufa12	Ndufa13	Ndufa6	Ndufa8	Ndufa9	Ndufab1	Ndufb10	Ndufb8	Ndufb9	Ndufs1	Ndufs2	Ndufs3	Ndufs7	Ndufs8	Ndufv1	Ndufv2
CELL SIGNALING	Retrograde endocannabinoid signaling	19	3.21e-17		ENSMUSP00000005647	ENSMUSP00000013737	ENSMUSP00000022286	ENSMUSP00000022980	ENSMUSP00000023085	ENSMUSP00000026222	ENSMUSP00000027111	ENSMUSP00000027478	ENSMUSP00000033157	ENSMUSP00000042967	ENSMUSP00000043543	ENSMUSP00000057543	ENSMUSP00000065352	ENSMUSP00000074600	ENSMUSP00000085523	ENSMUSP00000101003	ENSMUSP00000105796	ENSMUSP00000121557	ENSMUSP00000136313	Gnai2	Ndufa10	Ndufa12	Ndufa13	Ndufa6	Ndufa8	Ndufa9	Ndufab1	Ndufb10	Ndufb8	Ndufb9	Ndufs1	Ndufs2	Ndufs3	Ndufs4	Ndufs7	Ndufs8	Ndufv1	Ndufv2
	MAPK6/MAPK4 signaling	15	1.4e-16		ENSMUSP00000017365	ENSMUSP00000017572	ENSMUSP00000021049	ENSMUSP00000021063	ENSMUSP00000021595	ENSMUSP00000022256	ENSMUSP00000022380	ENSMUSP00000026560	ENSMUSP00000027432	ENSMUSP00000028278	ENSMUSP00000032824	ENSMUSP00000041968	ENSMUSP00000051657	ENSMUSP00000099933	ENSMUSP00000120096	Psmc1	Psmc4	Psmc5	Psmc6	Psmd1	Psmd11	Psmd12	Psmd13	Psmd14	Psmd3	Psmd6	Psmd7	Psmd8	Uba52	Xpo1
	Dectin-1 mediated noncanonical NF-kB signaling	14	2.07e-16		ENSMUSP00000017365	ENSMUSP00000017572	ENSMUSP00000021049	ENSMUSP00000021063	ENSMUSP00000021595	ENSMUSP00000022256	ENSMUSP00000022380	ENSMUSP00000026560	ENSMUSP00000027432	ENSMUSP00000028278	ENSMUSP00000032824	ENSMUSP00000041968	ENSMUSP00000051657	ENSMUSP00000120096	Psmc1	Psmc4	Psmc5	Psmc6	Psmd1	Psmd11	Psmd12	Psmd13	Psmd14	Psmd3	Psmd6	Psmd7	Psmd8	Uba52
	NIK-->noncanonical NF-kB signaling	14	2.07e-16		ENSMUSP00000017365	ENSMUSP00000017572	ENSMUSP00000021049	ENSMUSP00000021063	ENSMUSP00000021595	ENSMUSP00000022256	ENSMUSP00000022380	ENSMUSP00000026560	ENSMUSP00000027432	ENSMUSP00000028278	ENSMUSP00000032824	ENSMUSP00000041968	ENSMUSP00000051657	ENSMUSP00000120096	Psmc1	Psmc4	Psmc5	Psmc6	Psmd1	Psmd11	Psmd12	Psmd13	Psmd14	Psmd3	Psmd6	Psmd7	Psmd8	Uba52
	Downstream TCR signaling	14	1.58e-14		ENSMUSP00000017365	ENSMUSP00000017572	ENSMUSP00000021049	ENSMUSP00000021063	ENSMUSP00000021595	ENSMUSP00000022256	ENSMUSP00000022380	ENSMUSP00000026560	ENSMUSP00000027432	ENSMUSP00000028278	ENSMUSP00000032824	ENSMUSP00000041968	ENSMUSP00000051657	ENSMUSP00000120096	Psmc1	Psmc4	Psmc5	Psmc6	Psmd1	Psmd11	Psmd12	Psmd13	Psmd14	Psmd3	Psmd6	Psmd7	Psmd8	Uba52
	Interleukin-1 signaling	14	3.09e-14		ENSMUSP00000017365	ENSMUSP00000017572	ENSMUSP00000021049	ENSMUSP00000021063	ENSMUSP00000021595	ENSMUSP00000022256	ENSMUSP00000022380	ENSMUSP00000026560	ENSMUSP00000027432	ENSMUSP00000028278	ENSMUSP00000032824	ENSMUSP00000041968	ENSMUSP00000051657	ENSMUSP00000120096	Psmc1	Psmc4	Psmc5	Psmc6	Psmd1	Psmd11	Psmd12	Psmd13	Psmd14	Psmd3	Psmd6	Psmd7	Psmd8	Uba52
	TCF dependent signaling in response to WNT	15	6.59e-12		ENSMUSP00000017365	ENSMUSP00000017572	ENSMUSP00000021049	ENSMUSP00000021063	ENSMUSP00000021595	ENSMUSP00000022256	ENSMUSP00000022380	ENSMUSP00000026560	ENSMUSP00000027432	ENSMUSP00000028278	ENSMUSP00000032824	ENSMUSP00000041968	ENSMUSP00000051657	ENSMUSP00000099933	ENSMUSP00000120096	Psmc1	Psmc4	Psmc5	Psmc6	Psmd1	Psmd11	Psmd12	Psmd13	Psmd14	Psmd3	Psmd6	Psmd7	Psmd8	Uba52	Xpo1
	Signaling by Interleukins	15	2.48e-09		ENSMUSP00000017365	ENSMUSP00000017572	ENSMUSP00000021049	ENSMUSP00000021063	ENSMUSP00000021595	ENSMUSP00000022256	ENSMUSP00000022380	ENSMUSP00000026560	ENSMUSP00000027432	ENSMUSP00000028278	ENSMUSP00000032824	ENSMUSP00000041968	ENSMUSP00000051657	ENSMUSP00000100026	ENSMUSP00000120096	Cntfr	Psmc1	Psmc4	Psmc5	Psmc6	Psmd1	Psmd11	Psmd12	Psmd13	Psmd14	Psmd3	Psmd6	Psmd7	Psmd8	Uba52
IMMUNE SYSTEM	Activation of NF-kappaB in B cells	14	4.85e-16		ENSMUSP00000017365	ENSMUSP00000017572	ENSMUSP00000021049	ENSMUSP00000021063	ENSMUSP00000021595	ENSMUSP00000022256	ENSMUSP00000022380	ENSMUSP00000026560	ENSMUSP00000027432	ENSMUSP00000028278	ENSMUSP00000032824	ENSMUSP00000041968	ENSMUSP00000051657	ENSMUSP00000120096	Psmc1	Psmc4	Psmc5	Psmc6	Psmd1	Psmd11	Psmd12	Psmd13	Psmd14	Psmd3	Psmd6	Psmd7	Psmd8	Uba52
	Innate Immune System	16	0.0012		ENSMUSP00000017365	ENSMUSP00000017572	ENSMUSP00000021049	ENSMUSP00000021063	ENSMUSP00000021595	ENSMUSP00000022256	ENSMUSP00000022380	ENSMUSP00000026292	ENSMUSP00000026560	ENSMUSP00000027432	ENSMUSP00000028278	ENSMUSP00000028681	ENSMUSP00000032824	ENSMUSP00000041968	ENSMUSP00000051657	ENSMUSP00000120096	F2	Huwe1	Psmc1	Psmc4	Psmc5	Psmc6	Psmd1	Psmd11	Psmd12	Psmd13	Psmd14	Psmd3	Psmd6	Psmd7	Psmd8	Uba52
	Immune System	19	0.0228		ENSMUSP00000003912	ENSMUSP00000017365	ENSMUSP00000017572	ENSMUSP00000021049	ENSMUSP00000021063	ENSMUSP00000021595	ENSMUSP00000022256	ENSMUSP00000022380	ENSMUSP00000026292	ENSMUSP00000026560	ENSMUSP00000027432	ENSMUSP00000028278	ENSMUSP00000028681	ENSMUSP00000028683	ENSMUSP00000032824	ENSMUSP00000041968	ENSMUSP00000051657	ENSMUSP00000100026	ENSMUSP00000120096	Calr	Cntfr	F2	Huwe1	Pdia3	Psmc1	Psmc4	Psmc5	Psmc6	Psmd1	Psmd11	Psmd12	Psmd13	Psmd14	Psmd3	Psmd6	Psmd7	Psmd8	Uba52
	Antigen processing-Cross presentation	15	7.72e-16		ENSMUSP00000003912	ENSMUSP00000017365	ENSMUSP00000017572	ENSMUSP00000021049	ENSMUSP00000021063	ENSMUSP00000021595	ENSMUSP00000022256	ENSMUSP00000022380	ENSMUSP00000026560	ENSMUSP00000027432	ENSMUSP00000028278	ENSMUSP00000028683	ENSMUSP00000032824	ENSMUSP00000041968	ENSMUSP00000051657	Calr	Pdia3	Psmc1	Psmc4	Psmc5	Psmc6	Psmd1	Psmd11	Psmd12	Psmd13	Psmd14	Psmd3	Psmd6	Psmd7	Psmd8
	Cross-presentation of soluble exogenous antigens (endosomes)	13	8.75e-16		ENSMUSP00000017365	ENSMUSP00000017572	ENSMUSP00000021049	ENSMUSP00000021063	ENSMUSP00000021595	ENSMUSP00000022256	ENSMUSP00000022380	ENSMUSP00000026560	ENSMUSP00000027432	ENSMUSP00000028278	ENSMUSP00000032824	ENSMUSP00000041968	ENSMUSP00000051657	Psmc1	Psmc4	Psmc5	Psmc6	Psmd1	Psmd11	Psmd12	Psmd13	Psmd14	Psmd3	Psmd6	Psmd7	Psmd8
	Degradation of beta-catenin by the destruction complex	14	3.95e-15		ENSMUSP00000017365	ENSMUSP00000017572	ENSMUSP00000021049	ENSMUSP00000021063	ENSMUSP00000021595	ENSMUSP00000022256	ENSMUSP00000022380	ENSMUSP00000026560	ENSMUSP00000027432	ENSMUSP00000028278	ENSMUSP00000032824	ENSMUSP00000041968	ENSMUSP00000051657	ENSMUSP00000120096	Psmc1	Psmc4	Psmc5	Psmc6	Psmd1	Psmd11	Psmd12	Psmd13	Psmd14	Psmd3	Psmd6	Psmd7	Psmd8	Uba52
	FCERI mediated NF-kB activation	14	3.95e-15		ENSMUSP00000017365	ENSMUSP00000017572	ENSMUSP00000021049	ENSMUSP00000021063	ENSMUSP00000021595	ENSMUSP00000022256	ENSMUSP00000022380	ENSMUSP00000026560	ENSMUSP00000027432	ENSMUSP00000028278	ENSMUSP00000032824	ENSMUSP00000041968	ENSMUSP00000051657	ENSMUSP00000120096	Psmc1	Psmc4	Psmc5	Psmc6	Psmd1	Psmd11	Psmd12	Psmd13	Psmd14	Psmd3	Psmd6	Psmd7	Psmd8	Uba52
CELL CYCLE	Ubiquitin Mediated Degradation of Phosphorylated Cdc25A	14	8.37e-17		ENSMUSP00000017365	ENSMUSP00000017572	ENSMUSP00000021049	ENSMUSP00000021063	ENSMUSP00000021595	ENSMUSP00000022256	ENSMUSP00000022380	ENSMUSP00000026560	ENSMUSP00000027432	ENSMUSP00000028278	ENSMUSP00000032824	ENSMUSP00000041968	ENSMUSP00000051657	ENSMUSP00000120096	Psmc1	Psmc4	Psmc5	Psmc6	Psmd1	Psmd11	Psmd12	Psmd13	Psmd14	Psmd3	Psmd6	Psmd7	Psmd8	Uba52
	Regulation of ornithine decarboxylase (ODC)	14	8.96e-17		ENSMUSP00000003947	ENSMUSP00000017365	ENSMUSP00000017572	ENSMUSP00000021049	ENSMUSP00000021063	ENSMUSP00000021595	ENSMUSP00000022256	ENSMUSP00000022380	ENSMUSP00000026560	ENSMUSP00000027432	ENSMUSP00000028278	ENSMUSP00000032824	ENSMUSP00000041968	ENSMUSP00000051657	Nqo1	Psmc1	Psmc4	Psmc5	Psmc6	Psmd1	Psmd11	Psmd12	Psmd13	Psmd14	Psmd3	Psmd6	Psmd7	Psmd8
	FBXL7 down-regulates AURKA during mitotic entry and in early mitosis	14	1.3e-16		ENSMUSP00000017365	ENSMUSP00000017572	ENSMUSP00000021049	ENSMUSP00000021063	ENSMUSP00000021595	ENSMUSP00000022256	ENSMUSP00000022380	ENSMUSP00000026560	ENSMUSP00000027432	ENSMUSP00000028278	ENSMUSP00000032824	ENSMUSP00000041968	ENSMUSP00000051657	ENSMUSP00000120096	Psmc1	Psmc4	Psmc5	Psmc6	Psmd1	Psmd11	Psmd12	Psmd13	Psmd14	Psmd3	Psmd6	Psmd7	Psmd8	Uba52
	CDT1 association with the CDC6:ORC:origin complex	14	2.07e-16		ENSMUSP00000017365	ENSMUSP00000017572	ENSMUSP00000021049	ENSMUSP00000021063	ENSMUSP00000021595	ENSMUSP00000022256	ENSMUSP00000022380	ENSMUSP00000026560	ENSMUSP00000027432	ENSMUSP00000028278	ENSMUSP00000032824	ENSMUSP00000041968	ENSMUSP00000051657	ENSMUSP00000120096	Psmc1	Psmc4	Psmc5	Psmc6	Psmd1	Psmd11	Psmd12	Psmd13	Psmd14	Psmd3	Psmd6	Psmd7	Psmd8	Uba52
	APC/C:Cdc20 mediated degradation of Securin	14	7.69e-16		ENSMUSP00000017365	ENSMUSP00000017572	ENSMUSP00000021049	ENSMUSP00000021063	ENSMUSP00000021595	ENSMUSP00000022256	ENSMUSP00000022380	ENSMUSP00000026560	ENSMUSP00000027432	ENSMUSP00000028278	ENSMUSP00000032824	ENSMUSP00000041968	ENSMUSP00000051657	ENSMUSP00000120096	Psmc1	Psmc4	Psmc5	Psmc6	Psmd1	Psmd11	Psmd12	Psmd13	Psmd14	Psmd3	Psmd6	Psmd7	Psmd8	Uba52
	APC/C:Cdh1 mediated degradation of Cdc20 and other APC/C:Cdh1 targeted proteins in late mitosis/early G1	14	1.6e-15		ENSMUSP00000017365	ENSMUSP00000017572	ENSMUSP00000021049	ENSMUSP00000021063	ENSMUSP00000021595	ENSMUSP00000022256	ENSMUSP00000022380	ENSMUSP00000026560	ENSMUSP00000027432	ENSMUSP00000028278	ENSMUSP00000032824	ENSMUSP00000041968	ENSMUSP00000051657	ENSMUSP00000120096	Psmc1	Psmc4	Psmc5	Psmc6	Psmd1	Psmd11	Psmd12	Psmd13	Psmd14	Psmd3	Psmd6	Psmd7	Psmd8	Uba52
	Cdc20:Phospho-APC/C mediated degradation of Cyclin A	14	1.6e-15		ENSMUSP00000017365	ENSMUSP00000017572	ENSMUSP00000021049	ENSMUSP00000021063	ENSMUSP00000021595	ENSMUSP00000022256	ENSMUSP00000022380	ENSMUSP00000026560	ENSMUSP00000027432	ENSMUSP00000028278	ENSMUSP00000032824	ENSMUSP00000041968	ENSMUSP00000051657	ENSMUSP00000120096	Psmc1	Psmc4	Psmc5	Psmc6	Psmd1	Psmd11	Psmd12	Psmd13	Psmd14	Psmd3	Psmd6	Psmd7	Psmd8	Uba52
	CDK-mediated phosphorylation and removal of Cdc6	14	1.6e-15		ENSMUSP00000017365	ENSMUSP00000017572	ENSMUSP00000021049	ENSMUSP00000021063	ENSMUSP00000021595	ENSMUSP00000022256	ENSMUSP00000022380	ENSMUSP00000026560	ENSMUSP00000027432	ENSMUSP00000028278	ENSMUSP00000032824	ENSMUSP00000041968	ENSMUSP00000051657	ENSMUSP00000120096	Psmc1	Psmc4	Psmc5	Psmc6	Psmd1	Psmd11	Psmd12	Psmd13	Psmd14	Psmd3	Psmd6	Psmd7	Psmd8	Uba52
	The role of GTSE1 in G2/M progression after G2 checkpoint	14	2.1e-15		ENSMUSP00000017365	ENSMUSP00000017572	ENSMUSP00000021049	ENSMUSP00000021063	ENSMUSP00000021595	ENSMUSP00000022256	ENSMUSP00000022380	ENSMUSP00000026560	ENSMUSP00000027432	ENSMUSP00000028278	ENSMUSP00000032824	ENSMUSP00000041968	ENSMUSP00000051657	ENSMUSP00000120096	Psmc1	Psmc4	Psmc5	Psmc6	Psmd1	Psmd11	Psmd12	Psmd13	Psmd14	Psmd3	Psmd6	Psmd7	Psmd8	Uba52
	Mitotic G1-G1/S phases	15	1.05e-13		ENSMUSP00000017365	ENSMUSP00000017572	ENSMUSP00000021049	ENSMUSP00000021063	ENSMUSP00000021595	ENSMUSP00000022256	ENSMUSP00000022380	ENSMUSP00000026560	ENSMUSP00000027432	ENSMUSP00000028278	ENSMUSP00000032824	ENSMUSP00000041968	ENSMUSP00000051657	ENSMUSP00000086640	ENSMUSP00000120096	Ppp2r2a	Psmc1	Psmc4	Psmc5	Psmc6	Psmd1	Psmd11	Psmd12	Psmd13	Psmd14	Psmd3	Psmd6	Psmd7	Psmd8	Uba52
	Separation of Sister Chromatids	16	6.52e-13		ENSMUSP00000017365	ENSMUSP00000017572	ENSMUSP00000021049	ENSMUSP00000021063	ENSMUSP00000021595	ENSMUSP00000022256	ENSMUSP00000022380	ENSMUSP00000026560	ENSMUSP00000027432	ENSMUSP00000028278	ENSMUSP00000032824	ENSMUSP00000041968	ENSMUSP00000051657	ENSMUSP00000099933	ENSMUSP00000120096	ENSMUSP00000132102	Psmc1	Psmc4	Psmc5	Psmc6	Psmd1	Psmd11	Psmd12	Psmd13	Psmd14	Psmd3	Psmd6	Psmd7	Psmd8	Rps27	Uba52	Xpo1
	G2/M Transition	16	6.52e-13		ENSMUSP00000017365	ENSMUSP00000017572	ENSMUSP00000021049	ENSMUSP00000021063	ENSMUSP00000021595	ENSMUSP00000022256	ENSMUSP00000022380	ENSMUSP00000026560	ENSMUSP00000027432	ENSMUSP00000028278	ENSMUSP00000032824	ENSMUSP00000041968	ENSMUSP00000051657	ENSMUSP00000086640	ENSMUSP00000099933	ENSMUSP00000120096	Ppp2r2a	Psmc1	Psmc4	Psmc5	Psmc6	Psmd1	Psmd11	Psmd12	Psmd13	Psmd14	Psmd3	Psmd6	Psmd7	Psmd8	Uba52	Xpo1
	G2/M Checkpoints	14	3.56e-12		ENSMUSP00000017365	ENSMUSP00000017572	ENSMUSP00000021049	ENSMUSP00000021063	ENSMUSP00000021595	ENSMUSP00000022256	ENSMUSP00000022380	ENSMUSP00000026560	ENSMUSP00000027432	ENSMUSP00000028278	ENSMUSP00000032824	ENSMUSP00000041968	ENSMUSP00000051657	ENSMUSP00000120096	Psmc1	Psmc4	Psmc5	Psmc6	Psmd1	Psmd11	Psmd12	Psmd13	Psmd14	Psmd3	Psmd6	Psmd7	Psmd8	Uba52
	Cell Cycle Checkpoints	16	8.22e-11		ENSMUSP00000017365	ENSMUSP00000017572	ENSMUSP00000021049	ENSMUSP00000021063	ENSMUSP00000021595	ENSMUSP00000022256	ENSMUSP00000022380	ENSMUSP00000026560	ENSMUSP00000027432	ENSMUSP00000028278	ENSMUSP00000032824	ENSMUSP00000041968	ENSMUSP00000051657	ENSMUSP00000099933	ENSMUSP00000120096	ENSMUSP00000132102	Psmc1	Psmc4	Psmc5	Psmc6	Psmd1	Psmd11	Psmd12	Psmd13	Psmd14	Psmd3	Psmd6	Psmd7	Psmd8	Rps27	Uba52	Xpo1
	Cell Cycle Mitotic	17	4.1e-08		ENSMUSP00000017365	ENSMUSP00000017572	ENSMUSP00000021049	ENSMUSP00000021063	ENSMUSP00000021595	ENSMUSP00000022256	ENSMUSP00000022380	ENSMUSP00000026560	ENSMUSP00000027432	ENSMUSP00000028278	ENSMUSP00000032824	ENSMUSP00000041968	ENSMUSP00000051657	ENSMUSP00000086640	ENSMUSP00000099933	ENSMUSP00000120096	ENSMUSP00000132102	Ppp2r2a	Psmc1	Psmc4	Psmc5	Psmc6	Psmd1	Psmd11	Psmd12	Psmd13	Psmd14	Psmd3	Psmd6	Psmd7	Psmd8	Rps27	Uba52	Xpo1
	Cell Cycle	18	4.4e-08		ENSMUSP00000017365	ENSMUSP00000017572	ENSMUSP00000021049	ENSMUSP00000021063	ENSMUSP00000021595	ENSMUSP00000022256	ENSMUSP00000022380	ENSMUSP00000026560	ENSMUSP00000027432	ENSMUSP00000028278	ENSMUSP00000032824	ENSMUSP00000033776	ENSMUSP00000041968	ENSMUSP00000051657	ENSMUSP00000086640	ENSMUSP00000099933	ENSMUSP00000120096	ENSMUSP00000132102	Dkc1	Ppp2r2a	Psmc1	Psmc4	Psmc5	Psmc6	Psmd1	Psmd11	Psmd12	Psmd13	Psmd14	Psmd3	Psmd6	Psmd7	Psmd8	Rps27	Uba52	Xpo1
	Cyclin A/B1/B2 associated events during G2/M transition	2	0.0339		ENSMUSP00000086640	ENSMUSP00000099933	Ppp2r2a	Xpo1
NEURODEGENARATIVE DISEASES	Parkinson's disease	24	8.72e-24		ENSMUSP00000000090	ENSMUSP00000005647	ENSMUSP00000013737	ENSMUSP00000014457	ENSMUSP00000022286	ENSMUSP00000022980	ENSMUSP00000023085	ENSMUSP00000023210	ENSMUSP00000026222	ENSMUSP00000027111	ENSMUSP00000027478	ENSMUSP00000033157	ENSMUSP00000033176	ENSMUSP00000042967	ENSMUSP00000043543	ENSMUSP00000057543	ENSMUSP00000065352	ENSMUSP00000074600	ENSMUSP00000079944	ENSMUSP00000085523	ENSMUSP00000101003	ENSMUSP00000105796	ENSMUSP00000121557	ENSMUSP00000136313	Cox5a	Cox5b	Cox6c	Cyc1	Gnai2	Ndufa10	Ndufa12	Ndufa13	Ndufa6	Ndufa8	Ndufa9	Ndufab1	Ndufb10	Ndufb8	Ndufb9	Ndufs1	Ndufs2	Ndufs3	Ndufs4	Ndufs7	Ndufs8
	Huntington's disease	24	2.33e-21		ENSMUSP00000000090	ENSMUSP00000005647	ENSMUSP00000007012	ENSMUSP00000013737	ENSMUSP00000014457	ENSMUSP00000022286	ENSMUSP00000022980	ENSMUSP00000023085	ENSMUSP00000023210	ENSMUSP00000026222	ENSMUSP00000027111	ENSMUSP00000027478	ENSMUSP00000033157	ENSMUSP00000033176	ENSMUSP00000042967	ENSMUSP00000043543	ENSMUSP00000065352	ENSMUSP00000074600	ENSMUSP00000079944	ENSMUSP00000085523	ENSMUSP00000101003	ENSMUSP00000105796	ENSMUSP00000121557	ENSMUSP00000136313	Cox5a	Cox5b	Cox6c	Cyc1	Ndufa10	Ndufa12	Ndufa13	Ndufa6	Ndufa8	Ndufa9	Ndufab1	Ndufb10	Ndufb8	Ndufb9	Ndufs1	Ndufs2	Ndufs3	Ndufs4	Ndufs7	Ndufs8	Ndufv1
	Alzheimer's disease	23	3.74e-21		ENSMUSP00000000090	ENSMUSP00000005647	ENSMUSP00000013737	ENSMUSP00000014457	ENSMUSP00000022286	ENSMUSP00000022980	ENSMUSP00000023085	ENSMUSP00000023210	ENSMUSP00000026222	ENSMUSP00000027111	ENSMUSP00000027478	ENSMUSP00000033157	ENSMUSP00000033176	ENSMUSP00000042967	ENSMUSP00000043543	ENSMUSP00000065352	ENSMUSP00000074600	ENSMUSP00000079944	ENSMUSP00000085523	ENSMUSP00000101003	ENSMUSP00000105796	ENSMUSP00000121557	ENSMUSP00000136313	Cox5a	Cox5b	Cox6c	Cyc1	Ndufa10	Ndufa12	Ndufa13	Ndufa6	Ndufa8	Ndufa9	Ndufab1	Ndufb10	Ndufb8	Ndufb9	Ndufs1	Ndufs2	Ndufs3	Ndufs4	Ndufs7	Ndufs8	Ndufv1	Ndufv2
[truncated: 65 more columns]

## Sheet: enrichment.KEGG
#term ID	term description	observed gene count	background gene count	false discovery rate	matching proteins in your network (IDs)	matching proteins in your network (labels)
mmu03010	Ribosome	55	128	8.32e-76	ENSMUSP00000003521	ENSMUSP00000004072	ENSMUSP00000004554	ENSMUSP00000006496	ENSMUSP00000008812	ENSMUSP00000017548	ENSMUSP00000025511	ENSMUSP00000029722	ENSMUSP00000031617	ENSMUSP00000032998	ENSMUSP00000034966	ENSMUSP00000038352	ENSMUSP00000046506	ENSMUSP00000048469	ENSMUSP00000054490	ENSMUSP00000058432	ENSMUSP00000058919	ENSMUSP00000071616	ENSMUSP00000073175	ENSMUSP00000073880	ENSMUSP00000079163	ENSMUSP00000079180	ENSMUSP00000079340	ENSMUSP00000079628	ENSMUSP00000080354	ENSMUSP00000080523	ENSMUSP00000080854	ENSMUSP00000081474	ENSMUSP00000086614	ENSMUSP00000092502	ENSMUSP00000095287	ENSMUSP00000099435	ENSMUSP00000099595	ENSMUSP00000099757	ENSMUSP00000099878	ENSMUSP00000099909	ENSMUSP00000102213	ENSMUSP00000103365	ENSMUSP00000103940	ENSMUSP00000104067	ENSMUSP00000106014	ENSMUSP00000108837	ENSMUSP00000110013	ENSMUSP00000110532	ENSMUSP00000110731
mmu05012	Parkinson's disease	24	138	8.72e-24	ENSMUSP00000000090	ENSMUSP00000005647	ENSMUSP00000013737	ENSMUSP00000014457	ENSMUSP00000022286	ENSMUSP00000022980	ENSMUSP00000023085	ENSMUSP00000023210	ENSMUSP00000026222	ENSMUSP00000027111	ENSMUSP00000027478	ENSMUSP00000033157	ENSMUSP00000033176	ENSMUSP00000042967	ENSMUSP00000043543	ENSMUSP00000057543	ENSMUSP00000065352	ENSMUSP00000074600	ENSMUSP00000079944	ENSMUSP00000085523	ENSMUSP00000101003	ENSMUSP00000105796	ENSMUSP00000121557	ENSMUSP00000136313	Cox5a	Cox5b	Cox6c	Cyc1	Gnai2	Ndufa10	Ndufa12	Ndufa13	Ndufa6	Ndufa8	Ndufa9	Ndufab1	Ndufb10	Ndufb8	Ndufb9	Ndufs1	Ndufs2	Ndufs3	Ndufs4	Ndufs7	Ndufs8
mmu00190	Oxidative phosphorylation	23	129	3.78e-23	ENSMUSP00000000090	ENSMUSP00000005647	ENSMUSP00000013737	ENSMUSP00000014457	ENSMUSP00000022286	ENSMUSP00000022980	ENSMUSP00000023085	ENSMUSP00000023210	ENSMUSP00000026222	ENSMUSP00000027111	ENSMUSP00000027478	ENSMUSP00000033157	ENSMUSP00000033176	ENSMUSP00000042967	ENSMUSP00000043543	ENSMUSP00000065352	ENSMUSP00000074600	ENSMUSP00000079944	ENSMUSP00000085523	ENSMUSP00000101003	ENSMUSP00000105796	ENSMUSP00000121557	ENSMUSP00000136313	Cox5a	Cox5b	Cox6c	Cyc1	Ndufa10	Ndufa12	Ndufa13	Ndufa6	Ndufa8	Ndufa9	Ndufab1	Ndufb10	Ndufb8	Ndufb9	Ndufs1	Ndufs2	Ndufs3	Ndufs4	Ndufs7	Ndufs8	Ndufv1	Ndufv2
mmu04932	Non-alcoholic fatty liver disease (NAFLD)	23	146	3.56e-22	ENSMUSP00000000090	ENSMUSP00000005647	ENSMUSP00000013737	ENSMUSP00000014457	ENSMUSP00000022286	ENSMUSP00000022980	ENSMUSP00000023085	ENSMUSP00000023210	ENSMUSP00000026222	ENSMUSP00000027111	ENSMUSP00000027478	ENSMUSP00000033157	ENSMUSP00000033176	ENSMUSP00000042967	ENSMUSP00000043543	ENSMUSP00000065352	ENSMUSP00000074600	ENSMUSP00000079944	ENSMUSP00000085523	ENSMUSP00000101003	ENSMUSP00000105796	ENSMUSP00000121557	ENSMUSP00000136313	Cox5a	Cox5b	Cox6c	Cyc1	Ndufa10	Ndufa12	Ndufa13	Ndufa6	Ndufa8	Ndufa9	Ndufab1	Ndufb10	Ndufb8	Ndufb9	Ndufs1	Ndufs2	Ndufs3	Ndufs4	Ndufs7	Ndufs8	Ndufv1	Ndufv2
mmu05016	Huntington's disease	24	187	2.33e-21	ENSMUSP00000000090	ENSMUSP00000005647	ENSMUSP00000007012	ENSMUSP00000013737	ENSMUSP00000014457	ENSMUSP00000022286	ENSMUSP00000022980	ENSMUSP00000023085	ENSMUSP00000023210	ENSMUSP00000026222	ENSMUSP00000027111	ENSMUSP00000027478	ENSMUSP00000033157	ENSMUSP00000033176	ENSMUSP00000042967	ENSMUSP00000043543	ENSMUSP00000065352	ENSMUSP00000074600	ENSMUSP00000079944	ENSMUSP00000085523	ENSMUSP00000101003	ENSMUSP00000105796	ENSMUSP00000121557	ENSMUSP00000136313	Cox5a	Cox5b	Cox6c	Cyc1	Ndufa10	Ndufa12	Ndufa13	Ndufa6	Ndufa8	Ndufa9	Ndufab1	Ndufb10	Ndufb8	Ndufb9	Ndufs1	Ndufs2	Ndufs3	Ndufs4	Ndufs7	Ndufs8	Ndufv1
mmu05010	Alzheimer's disease	23	167	3.74e-21	ENSMUSP00000000090	ENSMUSP00000005647	ENSMUSP00000013737	ENSMUSP00000014457	ENSMUSP00000022286	ENSMUSP00000022980	ENSMUSP00000023085	ENSMUSP00000023210	ENSMUSP00000026222	ENSMUSP00000027111	ENSMUSP00000027478	ENSMUSP00000033157	ENSMUSP00000033176	ENSMUSP00000042967	ENSMUSP00000043543	ENSMUSP00000065352	ENSMUSP00000074600	ENSMUSP00000079944	ENSMUSP00000085523	ENSMUSP00000101003	ENSMUSP00000105796	ENSMUSP00000121557	ENSMUSP00000136313	Cox5a	Cox5b	Cox6c	Cyc1	Ndufa10	Ndufa12	Ndufa13	Ndufa6	Ndufa8	Ndufa9	Ndufab1	Ndufb10	Ndufb8	Ndufb9	Ndufs1	Ndufs2	Ndufs3	Ndufs4	Ndufs7	Ndufs8	Ndufv1	Ndufv2
mmu04714	Thermogenesis	24	223	7.36e-20	ENSMUSP00000000090	ENSMUSP00000005647	ENSMUSP00000013737	ENSMUSP00000014457	ENSMUSP00000022286	ENSMUSP00000022980	ENSMUSP00000023085	ENSMUSP00000023210	ENSMUSP00000026222	ENSMUSP00000027111	ENSMUSP00000027478	ENSMUSP00000033157	ENSMUSP00000033176	ENSMUSP00000042967	ENSMUSP00000043543	ENSMUSP00000065352	ENSMUSP00000074600	ENSMUSP00000079944	ENSMUSP00000085523	ENSMUSP00000099878	ENSMUSP00000101003	ENSMUSP00000105796	ENSMUSP00000121557	ENSMUSP00000136313	Cox5a	Cox5b	Cox6c	Cyc1	Ndufa10	Ndufa12	Ndufa13	Ndufa6	Ndufa8	Ndufa9	Ndufab1	Ndufb10	Ndufb8	Ndufb9	Ndufs1	Ndufs2	Ndufs3	Ndufs4	Ndufs7	Ndufs8	Ndufv1
mmu03050	Proteasome	14	45	3.11e-17	ENSMUSP00000017365	ENSMUSP00000017572	ENSMUSP00000021049	ENSMUSP00000021063	ENSMUSP00000021595	ENSMUSP00000022256	ENSMUSP00000022380	ENSMUSP00000026560	ENSMUSP00000027432	ENSMUSP00000028278	ENSMUSP00000030769	ENSMUSP00000032824	ENSMUSP00000041968	ENSMUSP00000051657	Psmc1	Psmc2	Psmc4	Psmc5	Psmc6	Psmd1	Psmd11	Psmd12	Psmd13	Psmd14	Psmd3	Psmd6	Psmd7	Psmd8
mmu04723	Retrograde endocannabinoid signaling	19	145	3.21e-17	ENSMUSP00000005647	ENSMUSP00000013737	ENSMUSP00000022286	ENSMUSP00000022980	ENSMUSP00000023085	ENSMUSP00000026222	ENSMUSP00000027111	ENSMUSP00000027478	ENSMUSP00000033157	ENSMUSP00000042967	ENSMUSP00000043543	ENSMUSP00000057543	ENSMUSP00000065352	ENSMUSP00000074600	ENSMUSP00000085523	ENSMUSP00000101003	ENSMUSP00000105796	ENSMUSP00000121557	ENSMUSP00000136313	Gnai2	Ndufa10	Ndufa12	Ndufa13	Ndufa6	Ndufa8	Ndufa9	Ndufab1	Ndufb10	Ndufb8	Ndufb9	Ndufs1	Ndufs2	Ndufs3	Ndufs4	Ndufs7	Ndufs8	Ndufv1	Ndufv2
mmu05169	Epstein-Barr virus infection	16	205	2.49e-11	ENSMUSP00000017365	ENSMUSP00000017572	ENSMUSP00000021049	ENSMUSP00000021063	ENSMUSP00000021595	ENSMUSP00000022256	ENSMUSP00000022380	ENSMUSP00000026560	ENSMUSP00000027432	ENSMUSP00000028062	ENSMUSP00000028278	ENSMUSP00000030769	ENSMUSP00000032824	ENSMUSP00000041968	ENSMUSP00000051657	ENSMUSP00000099933	Psmc1	Psmc2	Psmc4	Psmc5	Psmc6	Psmd1	Psmd11	Psmd12	Psmd13	Psmd14	Psmd3	Psmd6	Psmd7	Psmd8	Vim	Xpo1
mmu01100	Metabolic pathways	25	1296	2.7e-05	ENSMUSP00000000090	ENSMUSP00000005647	ENSMUSP00000013737	ENSMUSP00000014457	ENSMUSP00000022286	ENSMUSP00000022980	ENSMUSP00000023085	ENSMUSP00000023210	ENSMUSP00000026222	ENSMUSP00000027111	ENSMUSP00000027478	ENSMUSP00000033157	ENSMUSP00000033176	ENSMUSP00000036696	ENSMUSP00000042967	ENSMUSP00000043543	ENSMUSP00000045841	ENSMUSP00000065352	ENSMUSP00000074600	ENSMUSP00000079944	ENSMUSP00000085523	ENSMUSP00000101003	ENSMUSP00000105796	ENSMUSP00000121557	ENSMUSP00000136313	Cox5a	Cox5b	Cox6c	Cyc1	Eprs	Gmds	Ndufa10	Ndufa12	Ndufa13	Ndufa6	Ndufa8	Ndufa9	Ndufab1	Ndufb10	Ndufb8	Ndufb9	Ndufs1	Ndufs2	Ndufs3	Ndufs4
mmu04260	Cardiac muscle contraction	5	75	0.0019	ENSMUSP00000000090	ENSMUSP00000014457	ENSMUSP00000023210	ENSMUSP00000033176	ENSMUSP00000079944	Cox5a	Cox5b	Cox6c	Cyc1	Uqcrc2
mmu03008	Ribosome biogenesis in eukaryotes	4	76	0.0178	ENSMUSP00000033776	ENSMUSP00000037613	ENSMUSP00000099933	ENSMUSP00000140250	Dkc1	Fbl	Nop58	Xpo1
[truncated: 65 more columns]

## Sheet: enrichment.RCTM
#term ID	term description	observed gene count	background gene count	false discovery rate	matching proteins in your network (IDs)	matching proteins in your network (labels)
MMU-8953854	Metabolism of RNA	38	448	5.2e-27	ENSMUSP00000003521	ENSMUSP00000006496	ENSMUSP00000008812	ENSMUSP00000017365	ENSMUSP00000017572	ENSMUSP00000021049	ENSMUSP00000021063	ENSMUSP00000021595	ENSMUSP00000022256	ENSMUSP00000022380	ENSMUSP00000025511	ENSMUSP00000026560	ENSMUSP00000027432	ENSMUSP00000028278	ENSMUSP00000029722	ENSMUSP00000032824	ENSMUSP00000032998	ENSMUSP00000037613	ENSMUSP00000038580	ENSMUSP00000041968	ENSMUSP00000051657	ENSMUSP00000054490	ENSMUSP00000058432	ENSMUSP00000073880	ENSMUSP00000076989	ENSMUSP00000079180	ENSMUSP00000086640	ENSMUSP00000092502	ENSMUSP00000099933	ENSMUSP00000103940	ENSMUSP00000110013	ENSMUSP00000110532	ENSMUSP00000119975	ENSMUSP00000120096	ENSMUSP00000120528	ENSMUSP00000126294	ENSMUSP00000132102	ENSMUSP00000140250	Fbl	Hnrnph1	Nop58	Ppp2r2a	Psmc1	Psmc4	Psmc5
MMU-72689	Formation of a pool of free 40S subunits	18	37	7.69e-24	ENSMUSP00000003521	ENSMUSP00000006496	ENSMUSP00000008812	ENSMUSP00000025511	ENSMUSP00000029722	ENSMUSP00000032998	ENSMUSP00000054490	ENSMUSP00000058432	ENSMUSP00000073880	ENSMUSP00000079180	ENSMUSP00000092502	ENSMUSP00000103940	ENSMUSP00000110013	ENSMUSP00000110532	ENSMUSP00000119975	ENSMUSP00000120528	ENSMUSP00000126294	ENSMUSP00000132102	Rps10	Rps11	Rps13	Rps14	Rps15a	Rps16	Rps18	Rps2	Rps20	Rps21	Rps23	Rps25	Rps27	Rps28	Rps3	Rps3a1	Rps7	Rps9
MMU-72695	Formation of the ternary complex and subsequently the 43S complex	18	40	1.57e-23	ENSMUSP00000003521	ENSMUSP00000006496	ENSMUSP00000008812	ENSMUSP00000025511	ENSMUSP00000029722	ENSMUSP00000032998	ENSMUSP00000054490	ENSMUSP00000058432	ENSMUSP00000073880	ENSMUSP00000079180	ENSMUSP00000092502	ENSMUSP00000103940	ENSMUSP00000110013	ENSMUSP00000110532	ENSMUSP00000119975	ENSMUSP00000120528	ENSMUSP00000126294	ENSMUSP00000132102	Rps10	Rps11	Rps13	Rps14	Rps15a	Rps16	Rps18	Rps2	Rps20	Rps21	Rps23	Rps25	Rps27	Rps28	Rps3	Rps3a1	Rps7	Rps9
MMU-72702	Ribosomal scanning and start codon recognition	18	46	9.13e-23	ENSMUSP00000003521	ENSMUSP00000006496	ENSMUSP00000008812	ENSMUSP00000025511	ENSMUSP00000029722	ENSMUSP00000032998	ENSMUSP00000054490	ENSMUSP00000058432	ENSMUSP00000073880	ENSMUSP00000079180	ENSMUSP00000092502	ENSMUSP00000103940	ENSMUSP00000110013	ENSMUSP00000110532	ENSMUSP00000119975	ENSMUSP00000120528	ENSMUSP00000126294	ENSMUSP00000132102	Rps10	Rps11	Rps13	Rps14	Rps15a	Rps16	Rps18	Rps2	Rps20	Rps21	Rps23	Rps25	Rps27	Rps28	Rps3	Rps3a1	Rps7	Rps9
MMU-72649	Translation initiation complex formation	18	48	1.37e-22	ENSMUSP00000003521	ENSMUSP00000006496	ENSMUSP00000008812	ENSMUSP00000025511	ENSMUSP00000029722	ENSMUSP00000032998	ENSMUSP00000054490	ENSMUSP00000058432	ENSMUSP00000073880	ENSMUSP00000079180	ENSMUSP00000092502	ENSMUSP00000103940	ENSMUSP00000110013	ENSMUSP00000110532	ENSMUSP00000119975	ENSMUSP00000120528	ENSMUSP00000126294	ENSMUSP00000132102	Rps10	Rps11	Rps13	Rps14	Rps15a	Rps16	Rps18	Rps2	Rps20	Rps21	Rps23	Rps25	Rps27	Rps28	Rps3	Rps3a1	Rps7	Rps9
MMU-156827	L13a-mediated translational silencing of Ceruloplasmin expression	18	50	1.8e-22	ENSMUSP00000003521	ENSMUSP00000006496	ENSMUSP00000008812	ENSMUSP00000025511	ENSMUSP00000029722	ENSMUSP00000032998	ENSMUSP00000054490	ENSMUSP00000058432	ENSMUSP00000073880	ENSMUSP00000079180	ENSMUSP00000092502	ENSMUSP00000103940	ENSMUSP00000110013	ENSMUSP00000110532	ENSMUSP00000119975	ENSMUSP00000120528	ENSMUSP00000126294	ENSMUSP00000132102	Rps10	Rps11	Rps13	Rps14	Rps15a	Rps16	Rps18	Rps2	Rps20	Rps21	Rps23	Rps25	Rps27	Rps28	Rps3	Rps3a1	Rps7	Rps9
MMU-6791226	Major pathway of rRNA processing in the nucleolus and cytosol	21	102	4.74e-22	ENSMUSP00000003521	ENSMUSP00000006496	ENSMUSP00000008812	ENSMUSP00000025511	ENSMUSP00000029722	ENSMUSP00000032998	ENSMUSP00000037613	ENSMUSP00000038580	ENSMUSP00000054490	ENSMUSP00000058432	ENSMUSP00000073880	ENSMUSP00000079180	ENSMUSP00000092502	ENSMUSP00000103940	ENSMUSP00000110013	ENSMUSP00000110532	ENSMUSP00000119975	ENSMUSP00000120528	ENSMUSP00000126294	ENSMUSP00000132102	ENSMUSP00000140250	Fbl	Nop58	Rps10	Rps11	Rps13	Rps14	Rps15a	Rps16	Rps18	Rps2	Rps20	Rps21	Rps23	Rps25	Rps27	Rps28	Rps3	Rps3a1	Rps7	Rps9	Rrp9
MMU-6799198	Complex I biogenesis	17	52	7.49e-21	ENSMUSP00000005647	ENSMUSP00000013737	ENSMUSP00000022980	ENSMUSP00000023085	ENSMUSP00000026222	ENSMUSP00000027111	ENSMUSP00000027478	ENSMUSP00000033157	ENSMUSP00000042967	ENSMUSP00000043543	ENSMUSP00000065352	ENSMUSP00000074600	ENSMUSP00000085523	ENSMUSP00000101003	ENSMUSP00000105796	ENSMUSP00000121557	ENSMUSP00000136313	Ndufa10	Ndufa12	Ndufa13	Ndufa6	Ndufa8	Ndufa9	Ndufab1	Ndufb10	Ndufb8	Ndufb9	Ndufs1	Ndufs2	Ndufs3	Ndufs7	Ndufs8	Ndufv1	Ndufv2
MMU-392499	Metabolism of proteins	47	1497	1.06e-17	ENSMUSP00000003521	ENSMUSP00000003912	ENSMUSP00000006496	ENSMUSP00000008812	ENSMUSP00000017365	ENSMUSP00000017572	ENSMUSP00000019638	ENSMUSP00000021049	ENSMUSP00000021063	ENSMUSP00000021595	ENSMUSP00000022256	ENSMUSP00000022380	ENSMUSP00000025511	ENSMUSP00000025645	ENSMUSP00000026560	ENSMUSP00000027050	ENSMUSP00000027432	ENSMUSP00000028278	ENSMUSP00000028681	ENSMUSP00000028683	ENSMUSP00000028826	ENSMUSP00000029722	ENSMUSP00000031779	ENSMUSP00000032824	ENSMUSP00000032998	ENSMUSP00000034588	ENSMUSP00000036696	ENSMUSP00000041968	ENSMUSP00000048416	ENSMUSP00000051657	ENSMUSP00000054490	ENSMUSP00000057543	ENSMUSP00000058432	ENSMUSP00000068971	ENSMUSP00000073880	ENSMUSP00000079180	ENSMUSP00000092502	ENSMUSP00000103940	ENSMUSP00000110013	ENSMUSP00000110532	ENSMUSP00000119975	ENSMUSP00000120096	ENSMUSP00000120528	ENSMUSP00000120904	ENSMUSP00000126294
MMU-69229	Ubiquitin-dependent degradation of Cyclin D1	14	46	7.63e-17	ENSMUSP00000017365	ENSMUSP00000017572	ENSMUSP00000021049	ENSMUSP00000021063	ENSMUSP00000021595	ENSMUSP00000022256	ENSMUSP00000022380	ENSMUSP00000026560	ENSMUSP00000027432	ENSMUSP00000028278	ENSMUSP00000032824	ENSMUSP00000041968	ENSMUSP00000051657	ENSMUSP00000120096	Psmc1	Psmc4	Psmc5	Psmc6	Psmd1	Psmd11	Psmd12	Psmd13	Psmd14	Psmd3	Psmd6	Psmd7	Psmd8	Uba52
MMU-8939902	Regulation of RUNX2 expression and activity	14	46	7.63e-17	ENSMUSP00000017365	ENSMUSP00000017572	ENSMUSP00000021049	ENSMUSP00000021063	ENSMUSP00000021595	ENSMUSP00000022256	ENSMUSP00000022380	ENSMUSP00000026560	ENSMUSP00000027432	ENSMUSP00000028278	ENSMUSP00000032824	ENSMUSP00000041968	ENSMUSP00000051657	ENSMUSP00000120096	Psmc1	Psmc4	Psmc5	Psmc6	Psmd1	Psmd11	Psmd12	Psmd13	Psmd14	Psmd3	Psmd6	Psmd7	Psmd8	Uba52
MMU-349425	Autodegradation of the E3 ubiquitin ligase COP1	14	47	8.37e-17	ENSMUSP00000017365	ENSMUSP00000017572	ENSMUSP00000021049	ENSMUSP00000021063	ENSMUSP00000021595	ENSMUSP00000022256	ENSMUSP00000022380	ENSMUSP00000026560	ENSMUSP00000027432	ENSMUSP00000028278	ENSMUSP00000032824	ENSMUSP00000041968	ENSMUSP00000051657	ENSMUSP00000120096	Psmc1	Psmc4	Psmc5	Psmc6	Psmd1	Psmd11	Psmd12	Psmd13	Psmd14	Psmd3	Psmd6	Psmd7	Psmd8	Uba52
MMU-69601	Ubiquitin Mediated Degradation of Phosphorylated Cdc25A	14	47	8.37e-17	ENSMUSP00000017365	ENSMUSP00000017572	ENSMUSP00000021049	ENSMUSP00000021063	ENSMUSP00000021595	ENSMUSP00000022256	ENSMUSP00000022380	ENSMUSP00000026560	ENSMUSP00000027432	ENSMUSP00000028278	ENSMUSP00000032824	ENSMUSP00000041968	ENSMUSP00000051657	ENSMUSP00000120096	Psmc1	Psmc4	Psmc5	Psmc6	Psmd1	Psmd11	Psmd12	Psmd13	Psmd14	Psmd3	Psmd6	Psmd7	Psmd8	Uba52
MMU-350562	Regulation of ornithine decarboxylase (ODC)	14	48	8.96e-17	ENSMUSP00000003947	ENSMUSP00000017365	ENSMUSP00000017572	ENSMUSP00000021049	ENSMUSP00000021063	ENSMUSP00000021595	ENSMUSP00000022256	ENSMUSP00000022380	ENSMUSP00000026560	ENSMUSP00000027432	ENSMUSP00000028278	ENSMUSP00000032824	ENSMUSP00000041968	ENSMUSP00000051657	Nqo1	Psmc1	Psmc4	Psmc5	Psmc6	Psmd1	Psmd11	Psmd12	Psmd13	Psmd14	Psmd3	Psmd6	Psmd7	Psmd8
MMU-4641257	Degradation of AXIN	14	49	1.1e-16	ENSMUSP00000017365	ENSMUSP00000017572	ENSMUSP00000021049	ENSMUSP00000021063	ENSMUSP00000021595	ENSMUSP00000022256	ENSMUSP00000022380	ENSMUSP00000026560	ENSMUSP00000027432	ENSMUSP00000028278	ENSMUSP00000032824	ENSMUSP00000041968	ENSMUSP00000051657	ENSMUSP00000120096	Psmc1	Psmc4	Psmc5	Psmc6	Psmd1	Psmd11	Psmd12	Psmd13	Psmd14	Psmd3	Psmd6	Psmd7	Psmd8	Uba52
MMU-8941858	Regulation of RUNX3 expression and activity	14	49	1.1e-16	ENSMUSP00000017365	ENSMUSP00000017572	ENSMUSP00000021049	ENSMUSP00000021063	ENSMUSP00000021595	ENSMUSP00000022256	ENSMUSP00000022380	ENSMUSP00000026560	ENSMUSP00000027432	ENSMUSP00000028278	ENSMUSP00000032824	ENSMUSP00000041968	ENSMUSP00000051657	ENSMUSP00000120096	Psmc1	Psmc4	Psmc5	Psmc6	Psmd1	Psmd11	Psmd12	Psmd13	Psmd14	Psmd3	Psmd6	Psmd7	Psmd8	Uba52
MMU-174113	SCF-beta-TrCP mediated degradation of Emi1	14	50	1.3e-16	ENSMUSP00000017365	ENSMUSP00000017572	ENSMUSP00000021049	ENSMUSP00000021063	ENSMUSP00000021595	ENSMUSP00000022256	ENSMUSP00000022380	ENSMUSP00000026560	ENSMUSP00000027432	ENSMUSP00000028278	ENSMUSP00000032824	ENSMUSP00000041968	ENSMUSP00000051657	ENSMUSP00000120096	Psmc1	Psmc4	Psmc5	Psmc6	Psmd1	Psmd11	Psmd12	Psmd13	Psmd14	Psmd3	Psmd6	Psmd7	Psmd8	Uba52
MMU-8854050	FBXL7 down-regulates AURKA during mitotic entry and in early mitosis	14	50	1.3e-16	ENSMUSP00000017365	ENSMUSP00000017572	ENSMUSP00000021049	ENSMUSP00000021063	ENSMUSP00000021595	ENSMUSP00000022256	ENSMUSP00000022380	ENSMUSP00000026560	ENSMUSP00000027432	ENSMUSP00000028278	ENSMUSP00000032824	ENSMUSP00000041968	ENSMUSP00000051657	ENSMUSP00000120096	Psmc1	Psmc4	Psmc5	Psmc6	Psmd1	Psmd11	Psmd12	Psmd13	Psmd14	Psmd3	Psmd6	Psmd7	Psmd8	Uba52
MMU-5687128	MAPK6/MAPK4 signaling	15	67	1.4e-16	ENSMUSP00000017365	ENSMUSP00000017572	ENSMUSP00000021049	ENSMUSP00000021063	ENSMUSP00000021595	ENSMUSP00000022256	ENSMUSP00000022380	ENSMUSP00000026560	ENSMUSP00000027432	ENSMUSP00000028278	ENSMUSP00000032824	ENSMUSP00000041968	ENSMUSP00000051657	ENSMUSP00000099933	ENSMUSP00000120096	Psmc1	Psmc4	Psmc5	Psmc6	Psmd1	Psmd11	Psmd12	Psmd13	Psmd14	Psmd3	Psmd6	Psmd7	Psmd8	Uba52	Xpo1
MMU-450408	AUF1 (hnRNP D0) binds and destabilizes mRNA	14	52	1.8e-16	ENSMUSP00000017365	ENSMUSP00000017572	ENSMUSP00000021049	ENSMUSP00000021063	ENSMUSP00000021595	ENSMUSP00000022256	ENSMUSP00000022380	ENSMUSP00000026560	ENSMUSP00000027432	ENSMUSP00000028278	ENSMUSP00000032824	ENSMUSP00000041968	ENSMUSP00000051657	ENSMUSP00000120096	Psmc1	Psmc4	Psmc5	Psmc6	Psmd1	Psmd11	Psmd12	Psmd13	Psmd14	Psmd3	Psmd6	Psmd7	Psmd8	Uba52
MMU-4641258	Degradation of DVL	14	52	1.8e-16	ENSMUSP00000017365	ENSMUSP00000017572	ENSMUSP00000021049	ENSMUSP00000021063	ENSMUSP00000021595	ENSMUSP00000022256	ENSMUSP00000022380	ENSMUSP00000026560	ENSMUSP00000027432	ENSMUSP00000028278	ENSMUSP00000032824	ENSMUSP00000041968	ENSMUSP00000051657	ENSMUSP00000120096	Psmc1	Psmc4	Psmc5	Psmc6	Psmd1	Psmd11	Psmd12	Psmd13	Psmd14	Psmd3	Psmd6	Psmd7	Psmd8	Uba52
MMU-5610780	Degradation of GLI1 by the proteasome	14	52	1.8e-16	ENSMUSP00000017365	ENSMUSP00000017572	ENSMUSP00000021049	ENSMUSP00000021063	ENSMUSP00000021595	ENSMUSP00000022256	ENSMUSP00000022380	ENSMUSP00000026560	ENSMUSP00000027432	ENSMUSP00000028278	ENSMUSP00000032824	ENSMUSP00000041968	ENSMUSP00000051657	ENSMUSP00000120096	Psmc1	Psmc4	Psmc5	Psmc6	Psmd1	Psmd11	Psmd12	Psmd13	Psmd14	Psmd3	Psmd6	Psmd7	Psmd8	Uba52
MMU-5607761	Dectin-1 mediated noncanonical NF-kB signaling	14	53	2.07e-16	ENSMUSP00000017365	ENSMUSP00000017572	ENSMUSP00000021049	ENSMUSP00000021063	ENSMUSP00000021595	ENSMUSP00000022256	ENSMUSP00000022380	ENSMUSP00000026560	ENSMUSP00000027432	ENSMUSP00000028278	ENSMUSP00000032824	ENSMUSP00000041968	ENSMUSP00000051657	ENSMUSP00000120096	Psmc1	Psmc4	Psmc5	Psmc6	Psmd1	Psmd11	Psmd12	Psmd13	Psmd14	Psmd3	Psmd6	Psmd7	Psmd8	Uba52
MMU-5676590	NIK-->noncanonical NF-kB signaling	14	53	2.07e-16	ENSMUSP00000017365	ENSMUSP00000017572	ENSMUSP00000021049	ENSMUSP00000021063	ENSMUSP00000021595	ENSMUSP00000022256	ENSMUSP00000022380	ENSMUSP00000026560	ENSMUSP00000027432	ENSMUSP00000028278	ENSMUSP00000032824	ENSMUSP00000041968	ENSMUSP00000051657	ENSMUSP00000120096	Psmc1	Psmc4	Psmc5	Psmc6	Psmd1	Psmd11	Psmd12	Psmd13	Psmd14	Psmd3	Psmd6	Psmd7	Psmd8	Uba52
MMU-68827	CDT1 association with the CDC6:ORC:origin complex	14	53	2.07e-16	ENSMUSP00000017365	ENSMUSP00000017572	ENSMUSP00000021049	ENSMUSP00000021063	ENSMUSP00000021595	ENSMUSP00000022256	ENSMUSP00000022380	ENSMUSP00000026560	ENSMUSP00000027432	ENSMUSP00000028278	ENSMUSP00000032824	ENSMUSP00000041968	ENSMUSP00000051657	ENSMUSP00000120096	Psmc1	Psmc4	Psmc5	Psmc6	Psmd1	Psmd11	Psmd12	Psmd13	Psmd14	Psmd3	Psmd6	Psmd7	Psmd8	Uba52
MMU-5610785	GLI3 is processed to GLI3R by the proteasome	14	54	2.38e-16	ENSMUSP00000017365	ENSMUSP00000017572	ENSMUSP00000021049	ENSMUSP00000021063	ENSMUSP00000021595	ENSMUSP00000022256	ENSMUSP00000022380	ENSMUSP00000026560	ENSMUSP00000027432	ENSMUSP00000028278	ENSMUSP00000032824	ENSMUSP00000041968	ENSMUSP00000051657	ENSMUSP00000120096	Psmc1	Psmc4	Psmc5	Psmc6	Psmd1	Psmd11	Psmd12	Psmd13	Psmd14	Psmd3	Psmd6	Psmd7	Psmd8	Uba52
MMU-187577	SCF(Skp2)-mediated degradation of p27/p21	14	55	2.89e-16	ENSMUSP00000017365	ENSMUSP00000017572	ENSMUSP00000021049	ENSMUSP00000021063	ENSMUSP00000021595	ENSMUSP00000022256	ENSMUSP00000022380	ENSMUSP00000026560	ENSMUSP00000027432	ENSMUSP00000028278	ENSMUSP00000032824	ENSMUSP00000041968	ENSMUSP00000051657	ENSMUSP00000120096	Psmc1	Psmc4	Psmc5	Psmc6	Psmd1	Psmd11	Psmd12	Psmd13	Psmd14	Psmd3	Psmd6	Psmd7	Psmd8	Uba52
MMU-174084	Autodegradation of Cdh1 by Cdh1:APC/C	14	57	4.22e-16	ENSMUSP00000017365	ENSMUSP00000017572	ENSMUSP00000021049	ENSMUSP00000021063	ENSMUSP00000021595	ENSMUSP00000022256	ENSMUSP00000022380	ENSMUSP00000026560	ENSMUSP00000027432	ENSMUSP00000028278	ENSMUSP00000032824	ENSMUSP00000041968	ENSMUSP00000051657	ENSMUSP00000120096	Psmc1	Psmc4	Psmc5	Psmc6	Psmd1	Psmd11	Psmd12	Psmd13	Psmd14	Psmd3	Psmd6	Psmd7	Psmd8	Uba52
MMU-4608870	Asymmetric localization of PCP proteins	14	57	4.22e-16	ENSMUSP00000017365	ENSMUSP00000017572	ENSMUSP00000021049	ENSMUSP00000021063	ENSMUSP00000021595	ENSMUSP00000022256	ENSMUSP00000022380	ENSMUSP00000026560	ENSMUSP00000027432	ENSMUSP00000028278	ENSMUSP00000032824	ENSMUSP00000041968	ENSMUSP00000051657	ENSMUSP00000120096	Psmc1	Psmc4	Psmc5	Psmc6	Psmd1	Psmd11	Psmd12	Psmd13	Psmd14	Psmd3	Psmd6	Psmd7	Psmd8	Uba52
MMU-450531	Regulation of mRNA stability by proteins that bind AU-rich elements	15	75	4.24e-16	ENSMUSP00000017365	ENSMUSP00000017572	ENSMUSP00000021049	ENSMUSP00000021063	ENSMUSP00000021595	ENSMUSP00000022256	ENSMUSP00000022380	ENSMUSP00000026560	ENSMUSP00000027432	ENSMUSP00000028278	ENSMUSP00000032824	ENSMUSP00000041968	ENSMUSP00000051657	ENSMUSP00000099933	ENSMUSP00000120096	Psmc1	Psmc4	Psmc5	Psmc6	Psmd1	Psmd11	Psmd12	Psmd13	Psmd14	Psmd3	Psmd6	Psmd7	Psmd8	Uba52	Xpo1
MMU-1169091	Activation of NF-kappaB in B cells	14	58	4.85e-16	ENSMUSP00000017365	ENSMUSP00000017572	ENSMUSP00000021049	ENSMUSP00000021063	ENSMUSP00000021595	ENSMUSP00000022256	ENSMUSP00000022380	ENSMUSP00000026560	ENSMUSP00000027432	ENSMUSP00000028278	ENSMUSP00000032824	ENSMUSP00000041968	ENSMUSP00000051657	ENSMUSP00000120096	Psmc1	Psmc4	Psmc5	Psmc6	Psmd1	Psmd11	Psmd12	Psmd13	Psmd14	Psmd3	Psmd6	Psmd7	Psmd8	Uba52
MMU-5358346	Hedgehog ligand biogenesis	14	58	4.85e-16	ENSMUSP00000017365	ENSMUSP00000017572	ENSMUSP00000021049	ENSMUSP00000021063	ENSMUSP00000021595	ENSMUSP00000022256	ENSMUSP00000022380	ENSMUSP00000026560	ENSMUSP00000027432	ENSMUSP00000028278	ENSMUSP00000032824	ENSMUSP00000041968	ENSMUSP00000051657	ENSMUSP00000120096	Psmc1	Psmc4	Psmc5	Psmc6	Psmd1	Psmd11	Psmd12	Psmd13	Psmd14	Psmd3	Psmd6	Psmd7	Psmd8	Uba52
MMU-1234176	Oxygen-dependent proline hydroxylation of Hypoxia-inducible Factor Alpha	14	60	6.66e-16	ENSMUSP00000017365	ENSMUSP00000017572	ENSMUSP00000021049	ENSMUSP00000021063	ENSMUSP00000021595	ENSMUSP00000022256	ENSMUSP00000022380	ENSMUSP00000026560	ENSMUSP00000027432	ENSMUSP00000028278	ENSMUSP00000032824	ENSMUSP00000041968	ENSMUSP00000051657	ENSMUSP00000120096	Psmc1	Psmc4	Psmc5	Psmc6	Psmd1	Psmd11	Psmd12	Psmd13	Psmd14	Psmd3	Psmd6	Psmd7	Psmd8	Uba52
MMU-351202	Metabolism of polyamines	15	79	7.2e-16	ENSMUSP00000003947	ENSMUSP00000017365	ENSMUSP00000017572	ENSMUSP00000021049	ENSMUSP00000021063	ENSMUSP00000021595	ENSMUSP00000022256	ENSMUSP00000022380	ENSMUSP00000026560	ENSMUSP00000027432	ENSMUSP00000028278	ENSMUSP00000032824	ENSMUSP00000041968	ENSMUSP00000051657	ENSMUSP00000078132	Nmral1	Nqo1	Psmc1	Psmc4	Psmc5	Psmc6	Psmd1	Psmd11	Psmd12	Psmd13	Psmd14	Psmd3	Psmd6	Psmd7	Psmd8
MMU-174154	APC/C:Cdc20 mediated degradation of Securin	14	61	7.69e-16	ENSMUSP00000017365	ENSMUSP00000017572	ENSMUSP00000021049	ENSMUSP00000021063	ENSMUSP00000021595	ENSMUSP00000022256	ENSMUSP00000022380	ENSMUSP00000026560	ENSMUSP00000027432	ENSMUSP00000028278	ENSMUSP00000032824	ENSMUSP00000041968	ENSMUSP00000051657	ENSMUSP00000120096	Psmc1	Psmc4	Psmc5	Psmc6	Psmd1	Psmd11	Psmd12	Psmd13	Psmd14	Psmd3	Psmd6	Psmd7	Psmd8	Uba52
MMU-5658442	Regulation of RAS by GAPs	14	61	7.69e-16	ENSMUSP00000017365	ENSMUSP00000017572	ENSMUSP00000021049	ENSMUSP00000021063	ENSMUSP00000021595	ENSMUSP00000022256	ENSMUSP00000022380	ENSMUSP00000026560	ENSMUSP00000027432	ENSMUSP00000028278	ENSMUSP00000032824	ENSMUSP00000041968	ENSMUSP00000051657	ENSMUSP00000120096	Psmc1	Psmc4	Psmc5	Psmc6	Psmd1	Psmd11	Psmd12	Psmd13	Psmd14	Psmd3	Psmd6	Psmd7	Psmd8	Uba52
MMU-1236975	Antigen processing-Cross presentation	15	80	7.72e-16	ENSMUSP00000003912	ENSMUSP00000017365	ENSMUSP00000017572	ENSMUSP00000021049	ENSMUSP00000021063	ENSMUSP00000021595	ENSMUSP00000022256	ENSMUSP00000022380	ENSMUSP00000026560	ENSMUSP00000027432	ENSMUSP00000028278	ENSMUSP00000028683	ENSMUSP00000032824	ENSMUSP00000041968	ENSMUSP00000051657	Calr	Pdia3	Psmc1	Psmc4	Psmc5	Psmc6	Psmd1	Psmd11	Psmd12	Psmd13	Psmd14	Psmd3	Psmd6	Psmd7	Psmd8
MMU-8939236	RUNX1 regulates transcription of genes involved in differentiation of HSCs	14	62	8.52e-16	ENSMUSP00000017365	ENSMUSP00000017572	ENSMUSP00000021049	ENSMUSP00000021063	ENSMUSP00000021595	ENSMUSP00000022256	ENSMUSP00000022380	ENSMUSP00000026560	ENSMUSP00000027432	ENSMUSP00000028278	ENSMUSP00000032824	ENSMUSP00000041968	ENSMUSP00000051657	ENSMUSP00000120096	Psmc1	Psmc4	Psmc5	Psmc6	Psmd1	Psmd11	Psmd12	Psmd13	Psmd14	Psmd3	Psmd6	Psmd7	Psmd8	Uba52
MMU-1236978	Cross-presentation of soluble exogenous antigens (endosomes)	13	46	8.75e-16	ENSMUSP00000017365	ENSMUSP00000017572	ENSMUSP00000021049	ENSMUSP00000021063	ENSMUSP00000021595	ENSMUSP00000022256	ENSMUSP00000022380	ENSMUSP00000026560	ENSMUSP00000027432	ENSMUSP00000028278	ENSMUSP00000032824	ENSMUSP00000041968	ENSMUSP00000051657	Psmc1	Psmc4	Psmc5	Psmc6	Psmd1	Psmd11	Psmd12	Psmd13	Psmd14	Psmd3	Psmd6	Psmd7	Psmd8
MMU-68949	Orc1 removal from chromatin	14	64	1.21e-15	ENSMUSP00000017365	ENSMUSP00000017572	ENSMUSP00000021049	ENSMUSP00000021063	ENSMUSP00000021595	ENSMUSP00000022256	ENSMUSP00000022380	ENSMUSP00000026560	ENSMUSP00000027432	ENSMUSP00000028278	ENSMUSP00000032824	ENSMUSP00000041968	ENSMUSP00000051657	ENSMUSP00000120096	Psmc1	Psmc4	Psmc5	Psmc6	Psmd1	Psmd11	Psmd12	Psmd13	Psmd14	Psmd3	Psmd6	Psmd7	Psmd8	Uba52
MMU-8948751	Regulation of PTEN stability and activity	14	64	1.21e-15	ENSMUSP00000017365	ENSMUSP00000017572	ENSMUSP00000021049	ENSMUSP00000021063	ENSMUSP00000021595	ENSMUSP00000022256	ENSMUSP00000022380	ENSMUSP00000026560	ENSMUSP00000027432	ENSMUSP00000028278	ENSMUSP00000032824	ENSMUSP00000041968	ENSMUSP00000051657	ENSMUSP00000120096	Psmc1	Psmc4	Psmc5	Psmc6	Psmd1	Psmd11	Psmd12	Psmd13	Psmd14	Psmd3	Psmd6	Psmd7	Psmd8	Uba52
MMU-174178	APC/C:Cdh1 mediated degradation of Cdc20 and other APC/C:Cdh1 targeted proteins in late mitosis/early G1	14	66	1.6e-15	ENSMUSP00000017365	ENSMUSP00000017572	ENSMUSP00000021049	ENSMUSP00000021063	ENSMUSP00000021595	ENSMUSP00000022256	ENSMUSP00000022380	ENSMUSP00000026560	ENSMUSP00000027432	ENSMUSP00000028278	ENSMUSP00000032824	ENSMUSP00000041968	ENSMUSP00000051657	ENSMUSP00000120096	Psmc1	Psmc4	Psmc5	Psmc6	Psmd1	Psmd11	Psmd12	Psmd13	Psmd14	Psmd3	Psmd6	Psmd7	Psmd8	Uba52
MMU-174184	Cdc20:Phospho-APC/C mediated degradation of Cyclin A	14	66	1.6e-15	ENSMUSP00000017365	ENSMUSP00000017572	ENSMUSP00000021049	ENSMUSP00000021063	ENSMUSP00000021595	ENSMUSP00000022256	ENSMUSP00000022380	ENSMUSP00000026560	ENSMUSP00000027432	ENSMUSP00000028278	ENSMUSP00000032824	ENSMUSP00000041968	ENSMUSP00000051657	ENSMUSP00000120096	Psmc1	Psmc4	Psmc5	Psmc6	Psmd1	Psmd11	Psmd12	Psmd13	Psmd14	Psmd3	Psmd6	Psmd7	Psmd8	Uba52
MMU-69017	CDK-mediated phosphorylation and removal of Cdc6	14	66	1.6e-15	ENSMUSP00000017365	ENSMUSP00000017572	ENSMUSP00000021049	ENSMUSP00000021063	ENSMUSP00000021595	ENSMUSP00000022256	ENSMUSP00000022380	ENSMUSP00000026560	ENSMUSP00000027432	ENSMUSP00000028278	ENSMUSP00000032824	ENSMUSP00000041968	ENSMUSP00000051657	ENSMUSP00000120096	Psmc1	Psmc4	Psmc5	Psmc6	Psmd1	Psmd11	Psmd12	Psmd13	Psmd14	Psmd3	Psmd6	Psmd7	Psmd8	Uba52
MMU-8852276	The role of GTSE1 in G2/M progression after G2 checkpoint	14	68	2.1e-15	ENSMUSP00000017365	ENSMUSP00000017572	ENSMUSP00000021049	ENSMUSP00000021063	ENSMUSP00000021595	ENSMUSP00000022256	ENSMUSP00000022380	ENSMUSP00000026560	ENSMUSP00000027432	ENSMUSP00000028278	ENSMUSP00000032824	ENSMUSP00000041968	ENSMUSP00000051657	ENSMUSP00000120096	Psmc1	Psmc4	Psmc5	Psmc6	Psmd1	Psmd11	Psmd12	Psmd13	Psmd14	Psmd3	Psmd6	Psmd7	Psmd8	Uba52
MMU-382556	ABC-family proteins mediated transport	15	91	3.19e-15	ENSMUSP00000017365	ENSMUSP00000017572	ENSMUSP00000021049	ENSMUSP00000021063	ENSMUSP00000021595	ENSMUSP00000022256	ENSMUSP00000022380	ENSMUSP00000026560	ENSMUSP00000027432	ENSMUSP00000028278	ENSMUSP00000032824	ENSMUSP00000034588	ENSMUSP00000041968	ENSMUSP00000051657	ENSMUSP00000120096	Apoa1	Psmc1	Psmc4	Psmc5	Psmc6	Psmd1	Psmd11	Psmd12	Psmd13	Psmd14	Psmd3	Psmd6	Psmd7	Psmd8	Uba52
MMU-195253	Degradation of beta-catenin by the destruction complex	14	72	3.95e-15	ENSMUSP00000017365	ENSMUSP00000017572	ENSMUSP00000021049	ENSMUSP00000021063	ENSMUSP00000021595	ENSMUSP00000022256	ENSMUSP00000022380	ENSMUSP00000026560	ENSMUSP00000027432	ENSMUSP00000028278	ENSMUSP00000032824	ENSMUSP00000041968	ENSMUSP00000051657	ENSMUSP00000120096	Psmc1	Psmc4	Psmc5	Psmc6	Psmd1	Psmd11	Psmd12	Psmd13	Psmd14	Psmd3	Psmd6	Psmd7	Psmd8	Uba52
MMU-2871837	FCERI mediated NF-kB activation	14	72	3.95e-15	ENSMUSP00000017365	ENSMUSP00000017572	ENSMUSP00000021049	ENSMUSP00000021063	ENSMUSP00000021595	ENSMUSP00000022256	ENSMUSP00000022380	ENSMUSP00000026560	ENSMUSP00000027432	ENSMUSP00000028278	ENSMUSP00000032824	ENSMUSP00000041968	ENSMUSP00000051657	ENSMUSP00000120096	Psmc1	Psmc4	Psmc5	Psmc6	Psmd1	Psmd11	Psmd12	Psmd13	Psmd14	Psmd3	Psmd6	Psmd7	Psmd8	Uba52
MMU-5689603	UCH proteinases	14	80	1.37e-14	ENSMUSP00000017365	ENSMUSP00000017572	ENSMUSP00000021049	ENSMUSP00000021063	ENSMUSP00000021595	ENSMUSP00000022256	ENSMUSP00000022380	ENSMUSP00000026560	ENSMUSP00000027432	ENSMUSP00000028278	ENSMUSP00000032824	ENSMUSP00000041968	ENSMUSP00000051657	ENSMUSP00000120096	Psmc1	Psmc4	Psmc5	Psmc6	Psmd1	Psmd11	Psmd12	Psmd13	Psmd14	Psmd3	Psmd6	Psmd7	Psmd8	Uba52
MMU-202424	Downstream TCR signaling	14	81	1.58e-14	ENSMUSP00000017365	ENSMUSP00000017572	ENSMUSP00000021049	ENSMUSP00000021063	ENSMUSP00000021595	ENSMUSP00000022256	ENSMUSP00000022380	ENSMUSP00000026560	ENSMUSP00000027432	ENSMUSP00000028278	ENSMUSP00000032824	ENSMUSP00000041968	ENSMUSP00000051657	ENSMUSP00000120096	Psmc1	Psmc4	Psmc5	Psmc6	Psmd1	Psmd11	Psmd12	Psmd13	Psmd14	Psmd3	Psmd6	Psmd7	Psmd8	Uba52
MMU-9020702	Interleukin-1 signaling	14	86	3.09e-14	ENSMUSP00000017365	ENSMUSP00000017572	ENSMUSP00000021049	ENSMUSP00000021063	ENSMUSP00000021595	ENSMUSP00000022256	ENSMUSP00000022380	ENSMUSP00000026560	ENSMUSP00000027432	ENSMUSP00000028278	ENSMUSP00000032824	ENSMUSP00000041968	ENSMUSP00000051657	ENSMUSP00000120096	Psmc1	Psmc4	Psmc5	Psmc6	Psmd1	Psmd11	Psmd12	Psmd13	Psmd14	Psmd3	Psmd6	Psmd7	Psmd8	Uba52
MMU-453279	Mitotic G1-G1/S phases	15	120	1.05e-13	ENSMUSP00000017365	ENSMUSP00000017572	ENSMUSP00000021049	ENSMUSP00000021063	ENSMUSP00000021595	ENSMUSP00000022256	ENSMUSP00000022380	ENSMUSP00000026560	ENSMUSP00000027432	ENSMUSP00000028278	ENSMUSP00000032824	ENSMUSP00000041968	ENSMUSP00000051657	ENSMUSP00000086640	ENSMUSP00000120096	Ppp2r2a	Psmc1	Psmc4	Psmc5	Psmc6	Psmd1	Psmd11	Psmd12	Psmd13	Psmd14	Psmd3	Psmd6	Psmd7	Psmd8	Uba52
MMU-5632684	Hedgehog 'on' state	14	105	3.32e-13	ENSMUSP00000017365	ENSMUSP00000017572	ENSMUSP00000021049	ENSMUSP00000021063	ENSMUSP00000021595	ENSMUSP00000022256	ENSMUSP00000022380	ENSMUSP00000026560	ENSMUSP00000027432	ENSMUSP00000028278	ENSMUSP00000032824	ENSMUSP00000041968	ENSMUSP00000051657	ENSMUSP00000120096	Psmc1	Psmc4	Psmc5	Psmc6	Psmd1	Psmd11	Psmd12	Psmd13	Psmd14	Psmd3	Psmd6	Psmd7	Psmd8	Uba52
MMU-2467813	Separation of Sister Chromatids	16	169	6.52e-13	ENSMUSP00000017365	ENSMUSP00000017572	ENSMUSP00000021049	ENSMUSP00000021063	ENSMUSP00000021595	ENSMUSP00000022256	ENSMUSP00000022380	ENSMUSP00000026560	ENSMUSP00000027432	ENSMUSP00000028278	ENSMUSP00000032824	ENSMUSP00000041968	ENSMUSP00000051657	ENSMUSP00000099933	ENSMUSP00000120096	ENSMUSP00000132102	Psmc1	Psmc4	Psmc5	Psmc6	Psmd1	Psmd11	Psmd12	Psmd13	Psmd14	Psmd3	Psmd6	Psmd7	Psmd8	Rps27	Uba52	Xpo1
MMU-69275	G2/M Transition	16	169	6.52e-13	ENSMUSP00000017365	ENSMUSP00000017572	ENSMUSP00000021049	ENSMUSP00000021063	ENSMUSP00000021595	ENSMUSP00000022256	ENSMUSP00000022380	ENSMUSP00000026560	ENSMUSP00000027432	ENSMUSP00000028278	ENSMUSP00000032824	ENSMUSP00000041968	ENSMUSP00000051657	ENSMUSP00000086640	ENSMUSP00000099933	ENSMUSP00000120096	Ppp2r2a	Psmc1	Psmc4	Psmc5	Psmc6	Psmd1	Psmd11	Psmd12	Psmd13	Psmd14	Psmd3	Psmd6	Psmd7	Psmd8	Uba52	Xpo1
MMU-69481	G2/M Checkpoints	14	128	3.56e-12	ENSMUSP00000017365	ENSMUSP00000017572	ENSMUSP00000021049	ENSMUSP00000021063	ENSMUSP00000021595	ENSMUSP00000022256	ENSMUSP00000022380	ENSMUSP00000026560	ENSMUSP00000027432	ENSMUSP00000028278	ENSMUSP00000032824	ENSMUSP00000041968	ENSMUSP00000051657	ENSMUSP00000120096	Psmc1	Psmc4	Psmc5	Psmc6	Psmd1	Psmd11	Psmd12	Psmd13	Psmd14	Psmd3	Psmd6	Psmd7	Psmd8	Uba52
MMU-8951664	Neddylation	17	230	4.24e-12	ENSMUSP00000017365	ENSMUSP00000017572	ENSMUSP00000019638	ENSMUSP00000021049	ENSMUSP00000021063	ENSMUSP00000021595	ENSMUSP00000022256	ENSMUSP00000022380	ENSMUSP00000026560	ENSMUSP00000027050	ENSMUSP00000027432	ENSMUSP00000028278	ENSMUSP00000032824	ENSMUSP00000041968	ENSMUSP00000048416	ENSMUSP00000051657	ENSMUSP00000120096	Cops4	Cops5	Cops6	Psmc1	Psmc4	Psmc5	Psmc6	Psmd1	Psmd11	Psmd12	Psmd13	Psmd14	Psmd3	Psmd6	Psmd7	Psmd8	Uba52
MMU-201681	TCF dependent signaling in response to WNT	15	166	6.59e-12	ENSMUSP00000017365	ENSMUSP00000017572	ENSMUSP00000021049	ENSMUSP00000021063	ENSMUSP00000021595	ENSMUSP00000022256	ENSMUSP00000022380	ENSMUSP00000026560	ENSMUSP00000027432	ENSMUSP00000028278	ENSMUSP00000032824	ENSMUSP00000041968	ENSMUSP00000051657	ENSMUSP00000099933	ENSMUSP00000120096	Psmc1	Psmc4	Psmc5	Psmc6	Psmd1	Psmd11	Psmd12	Psmd13	Psmd14	Psmd3	Psmd6	Psmd7	Psmd8	Uba52	Xpo1
MMU-71291	Metabolism of amino acids and derivatives	16	228	4.06e-11	ENSMUSP00000003947	ENSMUSP00000017365	ENSMUSP00000017572	ENSMUSP00000021049	ENSMUSP00000021063	ENSMUSP00000021595	ENSMUSP00000022256	ENSMUSP00000022380	ENSMUSP00000026560	ENSMUSP00000027432	ENSMUSP00000028278	ENSMUSP00000032824	ENSMUSP00000033157	ENSMUSP00000041968	ENSMUSP00000051657	ENSMUSP00000078132	Ndufab1	Nmral1	Nqo1	Psmc1	Psmc4	Psmc5	Psmc6	Psmd1	Psmd11	Psmd12	Psmd13	Psmd14	Psmd3	Psmd6	Psmd7	Psmd8
MMU-5689880	Ub-specific processing proteases	14	157	4.28e-11	ENSMUSP00000017365	ENSMUSP00000017572	ENSMUSP00000021049	ENSMUSP00000021063	ENSMUSP00000021595	ENSMUSP00000022256	ENSMUSP00000022380	ENSMUSP00000026560	ENSMUSP00000027432	ENSMUSP00000028278	ENSMUSP00000032824	ENSMUSP00000041968	ENSMUSP00000051657	ENSMUSP00000120096	Psmc1	Psmc4	Psmc5	Psmc6	Psmd1	Psmd11	Psmd12	Psmd13	Psmd14	Psmd3	Psmd6	Psmd7	Psmd8	Uba52
MMU-69620	Cell Cycle Checkpoints	16	240	8.22e-11	ENSMUSP00000017365	ENSMUSP00000017572	ENSMUSP00000021049	ENSMUSP00000021063	ENSMUSP00000021595	ENSMUSP00000022256	ENSMUSP00000022380	ENSMUSP00000026560	ENSMUSP00000027432	ENSMUSP00000028278	ENSMUSP00000032824	ENSMUSP00000041968	ENSMUSP00000051657	ENSMUSP00000099933	ENSMUSP00000120096	ENSMUSP00000132102	Psmc1	Psmc4	Psmc5	Psmc6	Psmd1	Psmd11	Psmd12	Psmd13	Psmd14	Psmd3	Psmd6	Psmd7	Psmd8	Rps27	Uba52	Xpo1
MMU-1430728	Metabolism	37	1685	7.04e-10	ENSMUSP00000003947	ENSMUSP00000005647	ENSMUSP00000013737	ENSMUSP00000017365	ENSMUSP00000017572	ENSMUSP00000021049	ENSMUSP00000021063	ENSMUSP00000021595	ENSMUSP00000022256	ENSMUSP00000022380	ENSMUSP00000022980	ENSMUSP00000023085	ENSMUSP00000026222	ENSMUSP00000026560	ENSMUSP00000027111	ENSMUSP00000027432	ENSMUSP00000027478	ENSMUSP00000028278	ENSMUSP00000032824	ENSMUSP00000033157	ENSMUSP00000034588	ENSMUSP00000041968	ENSMUSP00000042967	ENSMUSP00000043543	ENSMUSP00000051657	ENSMUSP00000057543	ENSMUSP00000065352	ENSMUSP00000074600	ENSMUSP00000078132	ENSMUSP00000085523	ENSMUSP00000101003	ENSMUSP00000105796	ENSMUSP00000114304	ENSMUSP00000114705	ENSMUSP00000120096	ENSMUSP00000121557	ENSMUSP00000136313	Aldh1l1	Apoa1	Dbi	Gnai2	Ndufa10	Ndufa12	Ndufa13	Ndufa6
MMU-983169	Class I MHC mediated antigen processing & presentation	17	344	1.51e-09	ENSMUSP00000003912	ENSMUSP00000017365	ENSMUSP00000017572	ENSMUSP00000021049	ENSMUSP00000021063	ENSMUSP00000021595	ENSMUSP00000022256	ENSMUSP00000022380	ENSMUSP00000026292	ENSMUSP00000026560	ENSMUSP00000027432	ENSMUSP00000028278	ENSMUSP00000028683	ENSMUSP00000032824	ENSMUSP00000041968	ENSMUSP00000051657	ENSMUSP00000120096	Calr	Huwe1	Pdia3	Psmc1	Psmc4	Psmc5	Psmc6	Psmd1	Psmd11	Psmd12	Psmd13	Psmd14	Psmd3	Psmd6	Psmd7	Psmd8	Uba52
MMU-449147	Signaling by Interleukins	15	262	2.48e-09	ENSMUSP00000017365	ENSMUSP00000017572	ENSMUSP00000021049	ENSMUSP00000021063	ENSMUSP00000021595	ENSMUSP00000022256	ENSMUSP00000022380	ENSMUSP00000026560	ENSMUSP00000027432	ENSMUSP00000028278	ENSMUSP00000032824	ENSMUSP00000041968	ENSMUSP00000051657	ENSMUSP00000100026	ENSMUSP00000120096	Cntfr	Psmc1	Psmc4	Psmc5	Psmc6	Psmd1	Psmd11	Psmd12	Psmd13	Psmd14	Psmd3	Psmd6	Psmd7	Psmd8	Uba52
MMU-983168	Antigen processing: Ubiquitination & Proteasome degradation	15	295	1.12e-08	ENSMUSP00000017365	ENSMUSP00000017572	ENSMUSP00000021049	ENSMUSP00000021063	ENSMUSP00000021595	ENSMUSP00000022256	ENSMUSP00000022380	ENSMUSP00000026292	ENSMUSP00000026560	ENSMUSP00000027432	ENSMUSP00000028278	ENSMUSP00000032824	ENSMUSP00000041968	ENSMUSP00000051657	ENSMUSP00000120096	Huwe1	Psmc1	Psmc4	Psmc5	Psmc6	Psmd1	Psmd11	Psmd12	Psmd13	Psmd14	Psmd3	Psmd6	Psmd7	Psmd8	Uba52
MMU-597592	Post-translational protein modification	29	1211	1.34e-08	ENSMUSP00000003912	ENSMUSP00000017365	ENSMUSP00000017572	ENSMUSP00000019638	ENSMUSP00000021049	ENSMUSP00000021063	ENSMUSP00000021595	ENSMUSP00000022256	ENSMUSP00000022380	ENSMUSP00000025645	ENSMUSP00000026560	ENSMUSP00000027050	ENSMUSP00000027432	ENSMUSP00000028278	ENSMUSP00000028681	ENSMUSP00000028683	ENSMUSP00000028826	ENSMUSP00000031779	ENSMUSP00000032824	ENSMUSP00000034588	ENSMUSP00000036696	ENSMUSP00000041968	ENSMUSP00000048416	ENSMUSP00000051657	ENSMUSP00000068971	ENSMUSP00000092502	ENSMUSP00000120096	ENSMUSP00000120904	ENSMUSP00000140250	Apoa1	Calr	Calu	Chgb	Cops4	Cops5	Cops6	F2	Gmds	Nop58	Pdia3	Psmc1	Psmc4	Psmc5	Psmc6	Psmd1
MMU-2262752	Cellular responses to stress	15	327	4.1e-08	ENSMUSP00000007012	ENSMUSP00000017365	ENSMUSP00000017572	ENSMUSP00000021049	ENSMUSP00000021063	ENSMUSP00000021595	ENSMUSP00000022256	ENSMUSP00000022380	ENSMUSP00000026560	ENSMUSP00000027432	ENSMUSP00000028278	ENSMUSP00000032824	ENSMUSP00000041968	ENSMUSP00000051657	ENSMUSP00000120096	Psmc1	Psmc4	Psmc5	Psmc6	Psmd1	Psmd11	Psmd12	Psmd13	Psmd14	Psmd3	Psmd6	Psmd7	Psmd8	Sod2	Uba52
MMU-69278	Cell Cycle Mitotic	17	435	4.1e-08	ENSMUSP00000017365	ENSMUSP00000017572	ENSMUSP00000021049	ENSMUSP00000021063	ENSMUSP00000021595	ENSMUSP00000022256	ENSMUSP00000022380	ENSMUSP00000026560	ENSMUSP00000027432	ENSMUSP00000028278	ENSMUSP00000032824	ENSMUSP00000041968	ENSMUSP00000051657	ENSMUSP00000086640	ENSMUSP00000099933	ENSMUSP00000120096	ENSMUSP00000132102	Ppp2r2a	Psmc1	Psmc4	Psmc5	Psmc6	Psmd1	Psmd11	Psmd12	Psmd13	Psmd14	Psmd3	Psmd6	Psmd7	Psmd8	Rps27	Uba52	Xpo1
MMU-1640170	Cell Cycle	18	496	4.4e-08	ENSMUSP00000017365	ENSMUSP00000017572	ENSMUSP00000021049	ENSMUSP00000021063	ENSMUSP00000021595	ENSMUSP00000022256	ENSMUSP00000022380	ENSMUSP00000026560	ENSMUSP00000027432	ENSMUSP00000028278	ENSMUSP00000032824	ENSMUSP00000033776	ENSMUSP00000041968	ENSMUSP00000051657	ENSMUSP00000086640	ENSMUSP00000099933	ENSMUSP00000120096	ENSMUSP00000132102	Dkc1	Ppp2r2a	Psmc1	Psmc4	Psmc5	Psmc6	Psmd1	Psmd11	Psmd12	Psmd13	Psmd14	Psmd3	Psmd6	Psmd7	Psmd8	Rps27	Uba52	Xpo1
MMU-382551	Transport of small molecules	16	624	2.39e-05	ENSMUSP00000017365	ENSMUSP00000017572	ENSMUSP00000021049	ENSMUSP00000021063	ENSMUSP00000021595	ENSMUSP00000022256	ENSMUSP00000022380	ENSMUSP00000026560	ENSMUSP00000027432	ENSMUSP00000028278	ENSMUSP00000032203	ENSMUSP00000032824	ENSMUSP00000034588	ENSMUSP00000041968	ENSMUSP00000051657	ENSMUSP00000120096	A2m	Apoa1	Psmc1	Psmc4	Psmc5	Psmc6	Psmd1	Psmd11	Psmd12	Psmd13	Psmd14	Psmd3	Psmd6	Psmd7	Psmd8	Uba52
MMU-532668	N-glycan trimming in the ER and Calnexin/Calreticulin cycle	4	30	0.00026	ENSMUSP00000003912	ENSMUSP00000021595	ENSMUSP00000028683	ENSMUSP00000120096	Calr	Pdia3	Psmc1	Uba52
MMU-5696394	DNA Damage Recognition in GG-NER	4	32	0.00032	ENSMUSP00000019638	ENSMUSP00000027050	ENSMUSP00000048416	ENSMUSP00000120096	Cops4	Cops5	Cops6	Uba52
MMU-381426	Regulation of Insulin-like Growth Factor (IGF) transport and uptake by Insulin-like Growth Factor Binding Proteins (IGFBPs)	6	129	0.001	ENSMUSP00000025645	ENSMUSP00000028681	ENSMUSP00000028826	ENSMUSP00000031779	ENSMUSP00000034588	ENSMUSP00000068971	Apoa1	Calu	Chgb	F2	Serpinc1	Tmem132a
MMU-168249	Innate Immune System	16	879	0.0012	ENSMUSP00000017365	ENSMUSP00000017572	ENSMUSP00000021049	ENSMUSP00000021063	ENSMUSP00000021595	ENSMUSP00000022256	ENSMUSP00000022380	ENSMUSP00000026292	ENSMUSP00000026560	ENSMUSP00000027432	ENSMUSP00000028278	ENSMUSP00000028681	ENSMUSP00000032824	ENSMUSP00000041968	ENSMUSP00000051657	ENSMUSP00000120096	F2	Huwe1	Psmc1	Psmc4	Psmc5	Psmc6	Psmd1	Psmd11	Psmd12	Psmd13	Psmd14	Psmd3	Psmd6	Psmd7	Psmd8	Uba52
MMU-6781823	Formation of TC-NER Pre-Incision Complex	4	47	0.0012	ENSMUSP00000019638	ENSMUSP00000027050	ENSMUSP00000048416	ENSMUSP00000120096	Cops4	Cops5	Cops6	Uba52
MMU-140837	Intrinsic Pathway of Fibrin Clot Formation	3	20	0.0015	ENSMUSP00000028681	ENSMUSP00000032203	ENSMUSP00000068971	A2m	F2	Serpinc1
MMU-901042	Calnexin/calreticulin cycle	3	21	0.0017	ENSMUSP00000003912	ENSMUSP00000028683	ENSMUSP00000120096	Calr	Pdia3	Uba52
MMU-8957275	Post-translational protein phosphorylation	5	114	0.0039	ENSMUSP00000025645	ENSMUSP00000028826	ENSMUSP00000031779	ENSMUSP00000034588	ENSMUSP00000068971	Apoa1	Calu	Chgb	Serpinc1	Tmem132a
MMU-8963896	HDL assembly	2	7	0.0048	ENSMUSP00000032203	ENSMUSP00000034588	A2m	Apoa1
MMU-3000480	Scavenging by Class A Receptors	2	9	0.0071	ENSMUSP00000003912	ENSMUSP00000034588	Apoa1	Calr
MMU-8856825	Cargo recognition for clathrin-mediated endocytosis	4	85	0.0092	ENSMUSP00000019638	ENSMUSP00000027050	ENSMUSP00000048416	ENSMUSP00000120096	Cops4	Cops5	Cops6	Uba52
MMU-6798695	Neutrophil degranulation	9	476	0.0167	ENSMUSP00000017365	ENSMUSP00000017572	ENSMUSP00000021063	ENSMUSP00000022256	ENSMUSP00000026292	ENSMUSP00000026560	ENSMUSP00000027432	ENSMUSP00000028278	ENSMUSP00000041968	Huwe1	Psmd1	Psmd11	Psmd12	Psmd13	Psmd14	Psmd3	Psmd6	Psmd7
MMU-168256	Immune System	19	1523	0.0228	ENSMUSP00000003912	ENSMUSP00000017365	ENSMUSP00000017572	ENSMUSP00000021049	ENSMUSP00000021063	ENSMUSP00000021595	ENSMUSP00000022256	ENSMUSP00000022380	ENSMUSP00000026292	ENSMUSP00000026560	ENSMUSP00000027432	ENSMUSP00000028278	ENSMUSP00000028681	ENSMUSP00000028683	ENSMUSP00000032824	ENSMUSP00000041968	ENSMUSP00000051657	ENSMUSP00000100026	ENSMUSP00000120096	Calr	Cntfr	F2	Huwe1	Pdia3	Psmc1	Psmc4	Psmc5	Psmc6	Psmd1	Psmd11	Psmd12	Psmd13	Psmd14	Psmd3	Psmd6	Psmd7	Psmd8	Uba52
MMU-140875	Common Pathway of Fibrin Clot Formation	2	20	0.0269	ENSMUSP00000028681	ENSMUSP00000068971	F2	Serpinc1
MMU-5689901	Metalloprotease DUBs	2	21	0.0292	ENSMUSP00000028278	ENSMUSP00000120096	Psmd14	Uba52
MMU-446203	Asparagine N-linked glycosylation	6	269	0.0308	ENSMUSP00000003912	ENSMUSP00000021595	ENSMUSP00000028683	ENSMUSP00000036696	ENSMUSP00000120096	ENSMUSP00000120904	Calr	Gmds	Pdia3	Psmc1	Tmed7	Uba52
MMU-69273	Cyclin A/B1/B2 associated events during G2/M transition	2	23	0.0339	ENSMUSP00000086640	ENSMUSP00000099933	Ppp2r2a	Xpo1
MMU-1236974	ER-Phagosome pathway	2	26	0.0418	ENSMUSP00000003912	ENSMUSP00000028683	Calr	Pdia3
[truncated: 49 more columns]

## Sheet: Cellular Component
#term ID	term description	observed gene count	background gene count	false discovery rate	matching proteins in your network (IDs)	matching proteins in your network (labels)
GO:0022626	cytosolic ribosome	59	107	1.91e-86	ENSMUSP00000003521	ENSMUSP00000004072	ENSMUSP00000004554	ENSMUSP00000006496	ENSMUSP00000008812	ENSMUSP00000008826	ENSMUSP00000017548	ENSMUSP00000025511	ENSMUSP00000026420	ENSMUSP00000029722	ENSMUSP00000031617	ENSMUSP00000032998	ENSMUSP00000034966	ENSMUSP00000038352	ENSMUSP00000046506	ENSMUSP00000048469	ENSMUSP00000054490	ENSMUSP00000058432	ENSMUSP00000058919	ENSMUSP00000071616	ENSMUSP00000073175	ENSMUSP00000073880	ENSMUSP00000079163	ENSMUSP00000079180	ENSMUSP00000079340	ENSMUSP00000079628	ENSMUSP00000080354	ENSMUSP00000080523	ENSMUSP00000080854	ENSMUSP00000081474	ENSMUSP00000086614	ENSMUSP00000090305	ENSMUSP00000092502	ENSMUSP00000095287	ENSMUSP00000099435	ENSMUSP00000099595	ENSMUSP00000099757	ENSMUSP00000099878	ENSMUSP00000099909	ENSMUSP00000102213	ENSMUSP00000103365	ENSMUSP00000103940	ENSMUSP00000104067	ENSMUSP00000106014	ENSMUSP00000106249
GO:0044445	cytosolic part	66	228	1.02e-82	ENSMUSP00000003521	ENSMUSP00000004072	ENSMUSP00000004554	ENSMUSP00000006496	ENSMUSP00000008812	ENSMUSP00000008826	ENSMUSP00000017548	ENSMUSP00000021049	ENSMUSP00000021595	ENSMUSP00000022380	ENSMUSP00000025511	ENSMUSP00000026420	ENSMUSP00000027432	ENSMUSP00000028278	ENSMUSP00000029722	ENSMUSP00000030769	ENSMUSP00000031617	ENSMUSP00000032824	ENSMUSP00000032998	ENSMUSP00000034966	ENSMUSP00000038352	ENSMUSP00000046506	ENSMUSP00000048469	ENSMUSP00000054490	ENSMUSP00000058432	ENSMUSP00000058919	ENSMUSP00000071616	ENSMUSP00000073175	ENSMUSP00000073880	ENSMUSP00000079163	ENSMUSP00000079180	ENSMUSP00000079340	ENSMUSP00000079628	ENSMUSP00000080354	ENSMUSP00000080523	ENSMUSP00000080854	ENSMUSP00000081474	ENSMUSP00000086614	ENSMUSP00000090305	ENSMUSP00000092502	ENSMUSP00000095287	ENSMUSP00000099435	ENSMUSP00000099595	ENSMUSP00000099757	ENSMUSP00000099878
GO:0044391	ribosomal subunit	59	181	7.19e-76	ENSMUSP00000003521	ENSMUSP00000004072	ENSMUSP00000004554	ENSMUSP00000006496	ENSMUSP00000008812	ENSMUSP00000008826	ENSMUSP00000017548	ENSMUSP00000025511	ENSMUSP00000026420	ENSMUSP00000029722	ENSMUSP00000031617	ENSMUSP00000032998	ENSMUSP00000034966	ENSMUSP00000038352	ENSMUSP00000046506	ENSMUSP00000048469	ENSMUSP00000054490	ENSMUSP00000058432	ENSMUSP00000058919	ENSMUSP00000071616	ENSMUSP00000073175	ENSMUSP00000073880	ENSMUSP00000079163	ENSMUSP00000079180	ENSMUSP00000079340	ENSMUSP00000079628	ENSMUSP00000080354	ENSMUSP00000080523	ENSMUSP00000080854	ENSMUSP00000081474	ENSMUSP00000086614	ENSMUSP00000090305	ENSMUSP00000092502	ENSMUSP00000095287	ENSMUSP00000099435	ENSMUSP00000099595	ENSMUSP00000099757	ENSMUSP00000099878	ENSMUSP00000099909	ENSMUSP00000102213	ENSMUSP00000103365	ENSMUSP00000103940	ENSMUSP00000104067	ENSMUSP00000106014	ENSMUSP00000106249
GO:0005840	ribosome	60	215	6.32e-74	ENSMUSP00000003521	ENSMUSP00000004072	ENSMUSP00000004554	ENSMUSP00000006496	ENSMUSP00000008812	ENSMUSP00000008826	ENSMUSP00000016072	ENSMUSP00000017548	ENSMUSP00000025511	ENSMUSP00000026420	ENSMUSP00000029722	ENSMUSP00000031617	ENSMUSP00000032998	ENSMUSP00000034966	ENSMUSP00000038352	ENSMUSP00000046506	ENSMUSP00000048469	ENSMUSP00000054490	ENSMUSP00000058432	ENSMUSP00000058919	ENSMUSP00000071616	ENSMUSP00000073175	ENSMUSP00000073880	ENSMUSP00000079163	ENSMUSP00000079180	ENSMUSP00000079340	ENSMUSP00000079628	ENSMUSP00000080354	ENSMUSP00000080523	ENSMUSP00000080854	ENSMUSP00000081474	ENSMUSP00000086614	ENSMUSP00000090305	ENSMUSP00000092502	ENSMUSP00000095287	ENSMUSP00000099435	ENSMUSP00000099595	ENSMUSP00000099757	ENSMUSP00000099878	ENSMUSP00000099909	ENSMUSP00000102213	ENSMUSP00000103365	ENSMUSP00000103940	ENSMUSP00000104067	ENSMUSP00000106014
GO:1990904	ribonucleoprotein complex	72	765	5.57e-60	ENSMUSP00000003521	ENSMUSP00000003912	ENSMUSP00000004072	ENSMUSP00000004554	ENSMUSP00000006496	ENSMUSP00000008812	ENSMUSP00000008826	ENSMUSP00000016072	ENSMUSP00000017548	ENSMUSP00000025511	ENSMUSP00000026420	ENSMUSP00000028062	ENSMUSP00000029722	ENSMUSP00000030769	ENSMUSP00000031617	ENSMUSP00000032998	ENSMUSP00000033776	ENSMUSP00000034966	ENSMUSP00000037613	ENSMUSP00000038352	ENSMUSP00000038580	ENSMUSP00000045841	ENSMUSP00000046506	ENSMUSP00000048153	ENSMUSP00000048469	ENSMUSP00000054490	ENSMUSP00000058432	ENSMUSP00000058919	ENSMUSP00000071616	ENSMUSP00000073175	ENSMUSP00000073880	ENSMUSP00000076989	ENSMUSP00000079163	ENSMUSP00000079180	ENSMUSP00000079340	ENSMUSP00000079628	ENSMUSP00000080354	ENSMUSP00000080523	ENSMUSP00000080854	ENSMUSP00000081474	ENSMUSP00000085986	ENSMUSP00000086614	ENSMUSP00000090305	ENSMUSP00000092502	ENSMUSP00000095287
GO:0032991	protein-containing complex	121	4701	8.02e-52	ENSMUSP00000000090	ENSMUSP00000003521	ENSMUSP00000003912	ENSMUSP00000004072	ENSMUSP00000004140	ENSMUSP00000004554	ENSMUSP00000005017	ENSMUSP00000005647	ENSMUSP00000006496	ENSMUSP00000008812	ENSMUSP00000008826	ENSMUSP00000013737	ENSMUSP00000016072	ENSMUSP00000017365	ENSMUSP00000017548	ENSMUSP00000017572	ENSMUSP00000019638	ENSMUSP00000021049	ENSMUSP00000021063	ENSMUSP00000021595	ENSMUSP00000022256	ENSMUSP00000022286	ENSMUSP00000022380	ENSMUSP00000022980	ENSMUSP00000023085	ENSMUSP00000023210	ENSMUSP00000023502	ENSMUSP00000025511	ENSMUSP00000026222	ENSMUSP00000026420	ENSMUSP00000026560	ENSMUSP00000027050	ENSMUSP00000027111	ENSMUSP00000027432	ENSMUSP00000027478	ENSMUSP00000028062	ENSMUSP00000028278	ENSMUSP00000028683	ENSMUSP00000029722	ENSMUSP00000030769	ENSMUSP00000031617	ENSMUSP00000032824	ENSMUSP00000032998	ENSMUSP00000033157	ENSMUSP00000033176
GO:0022625	cytosolic large ribosomal subunit	32	59	1.33e-45	ENSMUSP00000004072	ENSMUSP00000008826	ENSMUSP00000017548	ENSMUSP00000031617	ENSMUSP00000034966	ENSMUSP00000046506	ENSMUSP00000048469	ENSMUSP00000058919	ENSMUSP00000071616	ENSMUSP00000073175	ENSMUSP00000079163	ENSMUSP00000079340	ENSMUSP00000080354	ENSMUSP00000080523	ENSMUSP00000080854	ENSMUSP00000081474	ENSMUSP00000086614	ENSMUSP00000090305	ENSMUSP00000095287	ENSMUSP00000099435	ENSMUSP00000099595	ENSMUSP00000102213	ENSMUSP00000103365	ENSMUSP00000106014	ENSMUSP00000106249	ENSMUSP00000108837	ENSMUSP00000110731	ENSMUSP00000110886	ENSMUSP00000118787	ENSMUSP00000120096	ENSMUSP00000131489	ENSMUSP00000137631	Rpl10	Rpl10a	Rpl11	Rpl14	Rpl15	Rpl18	Rpl19	Rpl22	Rpl23	Rpl26	Rpl27	Rpl27-ps3	Rpl3
GO:0022627	cytosolic small ribosomal subunit	27	41	4.82e-40	ENSMUSP00000003521	ENSMUSP00000004554	ENSMUSP00000006496	ENSMUSP00000008812	ENSMUSP00000025511	ENSMUSP00000026420	ENSMUSP00000029722	ENSMUSP00000032998	ENSMUSP00000038352	ENSMUSP00000054490	ENSMUSP00000058432	ENSMUSP00000073880	ENSMUSP00000079180	ENSMUSP00000079628	ENSMUSP00000092502	ENSMUSP00000099757	ENSMUSP00000099878	ENSMUSP00000099909	ENSMUSP00000103940	ENSMUSP00000104067	ENSMUSP00000110013	ENSMUSP00000110532	ENSMUSP00000119975	ENSMUSP00000120528	ENSMUSP00000125977	ENSMUSP00000126294	ENSMUSP00000132102	Rps10	Rps11	Rps13	Rps14	Rps15a	Rps16	Rps17	Rps18	Rps19	Rps2	Rps20	Rps21	Rps23	Rps24	Rps25	Rps26	Rps27	Rps27a
GO:0005829	cytosol	94	3326	4.32e-38	ENSMUSP00000003521	ENSMUSP00000003912	ENSMUSP00000003947	ENSMUSP00000004072	ENSMUSP00000004140	ENSMUSP00000004554	ENSMUSP00000006496	ENSMUSP00000008812	ENSMUSP00000008826	ENSMUSP00000017548	ENSMUSP00000021049	ENSMUSP00000021595	ENSMUSP00000022380	ENSMUSP00000025511	ENSMUSP00000025851	ENSMUSP00000026292	ENSMUSP00000026420	ENSMUSP00000026560	ENSMUSP00000027050	ENSMUSP00000027432	ENSMUSP00000028062	ENSMUSP00000028278	ENSMUSP00000029382	ENSMUSP00000029722	ENSMUSP00000030769	ENSMUSP00000031617	ENSMUSP00000032824	ENSMUSP00000032998	ENSMUSP00000033157	ENSMUSP00000033699	ENSMUSP00000034588	ENSMUSP00000034960	ENSMUSP00000034966	ENSMUSP00000038352	ENSMUSP00000042967	ENSMUSP00000045841	ENSMUSP00000046506	ENSMUSP00000048416	ENSMUSP00000048469	ENSMUSP00000051657	ENSMUSP00000054490	ENSMUSP00000057543	ENSMUSP00000058432	ENSMUSP00000058919	ENSMUSP00000071616
GO:0044444	cytoplasmic part	129	7673	1.23e-36	ENSMUSP00000000090	ENSMUSP00000003521	ENSMUSP00000003912	ENSMUSP00000003947	ENSMUSP00000004072	ENSMUSP00000004140	ENSMUSP00000004554	ENSMUSP00000005647	ENSMUSP00000006496	ENSMUSP00000007012	ENSMUSP00000008812	ENSMUSP00000008826	ENSMUSP00000013737	ENSMUSP00000014457	ENSMUSP00000016072	ENSMUSP00000017548	ENSMUSP00000021049	ENSMUSP00000021595	ENSMUSP00000022286	ENSMUSP00000022380	ENSMUSP00000022980	ENSMUSP00000023085	ENSMUSP00000023210	ENSMUSP00000023502	ENSMUSP00000025511	ENSMUSP00000025645	ENSMUSP00000025851	ENSMUSP00000026222	ENSMUSP00000026292	ENSMUSP00000026420	ENSMUSP00000026560	ENSMUSP00000027050	ENSMUSP00000027111	ENSMUSP00000027432	ENSMUSP00000027478	ENSMUSP00000028062	ENSMUSP00000028278	ENSMUSP00000028683	ENSMUSP00000028826	ENSMUSP00000029382	ENSMUSP00000029699	ENSMUSP00000029722	ENSMUSP00000030769	ENSMUSP00000031617	ENSMUSP00000031779
GO:0044446	intracellular organelle part	121	7416	1.45e-30	ENSMUSP00000000090	ENSMUSP00000003521	ENSMUSP00000003912	ENSMUSP00000004072	ENSMUSP00000004554	ENSMUSP00000005017	ENSMUSP00000005647	ENSMUSP00000006496	ENSMUSP00000007012	ENSMUSP00000008812	ENSMUSP00000008826	ENSMUSP00000013737	ENSMUSP00000014457	ENSMUSP00000016072	ENSMUSP00000017548	ENSMUSP00000019638	ENSMUSP00000021049	ENSMUSP00000021063	ENSMUSP00000021595	ENSMUSP00000022286	ENSMUSP00000022380	ENSMUSP00000022980	ENSMUSP00000023085	ENSMUSP00000023210	ENSMUSP00000023502	ENSMUSP00000025511	ENSMUSP00000025645	ENSMUSP00000025851	ENSMUSP00000026222	ENSMUSP00000026292	ENSMUSP00000026420	ENSMUSP00000027050	ENSMUSP00000027111	ENSMUSP00000027478	ENSMUSP00000028062	ENSMUSP00000028683	ENSMUSP00000029382	ENSMUSP00000029699	ENSMUSP00000029722	ENSMUSP00000030769	ENSMUSP00000031617	ENSMUSP00000031779	ENSMUSP00000032824	ENSMUSP00000032998	ENSMUSP00000033157
GO:0005737	cytoplasm	133	9909	9.86e-28	ENSMUSP00000000090	ENSMUSP00000003521	ENSMUSP00000003912	ENSMUSP00000003947	ENSMUSP00000004072	ENSMUSP00000004140	ENSMUSP00000004554	ENSMUSP00000005017	ENSMUSP00000005647	ENSMUSP00000006496	ENSMUSP00000007012	ENSMUSP00000008812	ENSMUSP00000008826	ENSMUSP00000013737	ENSMUSP00000014457	ENSMUSP00000016072	ENSMUSP00000017548	ENSMUSP00000019638	ENSMUSP00000021049	ENSMUSP00000021063	ENSMUSP00000021595	ENSMUSP00000022286	ENSMUSP00000022380	ENSMUSP00000022980	ENSMUSP00000023085	ENSMUSP00000023210	ENSMUSP00000023502	ENSMUSP00000025511	ENSMUSP00000025645	ENSMUSP00000025851	ENSMUSP00000026222	ENSMUSP00000026292	ENSMUSP00000026420	ENSMUSP00000026560	ENSMUSP00000027050	ENSMUSP00000027111	ENSMUSP00000027432	ENSMUSP00000027478	ENSMUSP00000028062	ENSMUSP00000028278	ENSMUSP00000028683	ENSMUSP00000028826	ENSMUSP00000029382	ENSMUSP00000029699	ENSMUSP00000029722
GO:0005844	polysome	22	71	6.08e-27	ENSMUSP00000003912	ENSMUSP00000004072	ENSMUSP00000017548	ENSMUSP00000026420	ENSMUSP00000028062	ENSMUSP00000031617	ENSMUSP00000032998	ENSMUSP00000038352	ENSMUSP00000048469	ENSMUSP00000054490	ENSMUSP00000058432	ENSMUSP00000071616	ENSMUSP00000079180	ENSMUSP00000080523	ENSMUSP00000099595	ENSMUSP00000099878	ENSMUSP00000102213	ENSMUSP00000103365	ENSMUSP00000106014	ENSMUSP00000110013	ENSMUSP00000110886	ENSMUSP00000137631	Calr	Rpl10a	Rpl11	Rpl18	Rpl19	Rpl30	Rpl31	Rpl32	Rpl38	Rpl39	Rpl6	Rpl7	Rpl8	Rps21	Rps23	Rps25	Rps26	Rps28	Rps29	Rps3	Rps6	Vim
GO:0098803	respiratory chain complex	22	78	3.34e-26	ENSMUSP00000000090	ENSMUSP00000005647	ENSMUSP00000013737	ENSMUSP00000022286	ENSMUSP00000022980	ENSMUSP00000023085	ENSMUSP00000023210	ENSMUSP00000026222	ENSMUSP00000027111	ENSMUSP00000027478	ENSMUSP00000033157	ENSMUSP00000033176	ENSMUSP00000042967	ENSMUSP00000043543	ENSMUSP00000065352	ENSMUSP00000074600	ENSMUSP00000079944	ENSMUSP00000085523	ENSMUSP00000101003	ENSMUSP00000105796	ENSMUSP00000121557	ENSMUSP00000136313	Cox5a	Cox5b	Cyc1	Ndufa10	Ndufa12	Ndufa13	Ndufa6	Ndufa8	Ndufa9	Ndufab1	Ndufb10	Ndufb8	Ndufb9	Ndufs1	Ndufs2	Ndufs3	Ndufs4	Ndufs7	Ndufs8	Ndufv1	Ndufv2	Uqcrc2
GO:0005746	mitochondrial respirasome	22	79	4.01e-26	ENSMUSP00000000090	ENSMUSP00000005647	ENSMUSP00000013737	ENSMUSP00000022286	ENSMUSP00000022980	ENSMUSP00000023085	ENSMUSP00000023210	ENSMUSP00000026222	ENSMUSP00000027111	ENSMUSP00000027478	ENSMUSP00000033157	ENSMUSP00000033176	ENSMUSP00000042967	ENSMUSP00000043543	ENSMUSP00000065352	ENSMUSP00000074600	ENSMUSP00000079944	ENSMUSP00000085523	ENSMUSP00000101003	ENSMUSP00000105796	ENSMUSP00000121557	ENSMUSP00000136313	Cox5a	Cox5b	Cyc1	Ndufa10	Ndufa12	Ndufa13	Ndufa6	Ndufa8	Ndufa9	Ndufab1	Ndufb10	Ndufb8	Ndufb9	Ndufs1	Ndufs2	Ndufs3	Ndufs4	Ndufs7	Ndufs8	Ndufv1	Ndufv2	Uqcrc2
GO:0044424	intracellular part	141	12219	1.01e-24	ENSMUSP00000000090	ENSMUSP00000003521	ENSMUSP00000003912	ENSMUSP00000003947	ENSMUSP00000004072	ENSMUSP00000004140	ENSMUSP00000004554	ENSMUSP00000005017	ENSMUSP00000005647	ENSMUSP00000006496	ENSMUSP00000007012	ENSMUSP00000008812	ENSMUSP00000008826	ENSMUSP00000013737	ENSMUSP00000014457	ENSMUSP00000016072	ENSMUSP00000017365	ENSMUSP00000017548	ENSMUSP00000017572	ENSMUSP00000019638	ENSMUSP00000021049	ENSMUSP00000021063	ENSMUSP00000021595	ENSMUSP00000022256	ENSMUSP00000022286	ENSMUSP00000022380	ENSMUSP00000022980	ENSMUSP00000023085	ENSMUSP00000023210	ENSMUSP00000023502	ENSMUSP00000025511	ENSMUSP00000025645	ENSMUSP00000025851	ENSMUSP00000026222	ENSMUSP00000026292	ENSMUSP00000026420	ENSMUSP00000026560	ENSMUSP00000027050	ENSMUSP00000027111	ENSMUSP00000027432	ENSMUSP00000027478	ENSMUSP00000028062	ENSMUSP00000028278	ENSMUSP00000028683	ENSMUSP00000028826
GO:0005747	mitochondrial respiratory chain complex I	18	46	1.25e-23	ENSMUSP00000005647	ENSMUSP00000013737	ENSMUSP00000022286	ENSMUSP00000022980	ENSMUSP00000023085	ENSMUSP00000026222	ENSMUSP00000027111	ENSMUSP00000027478	ENSMUSP00000033157	ENSMUSP00000042967	ENSMUSP00000043543	ENSMUSP00000065352	ENSMUSP00000074600	ENSMUSP00000085523	ENSMUSP00000101003	ENSMUSP00000105796	ENSMUSP00000121557	ENSMUSP00000136313	Ndufa10	Ndufa12	Ndufa13	Ndufa6	Ndufa8	Ndufa9	Ndufab1	Ndufb10	Ndufb8	Ndufb9	Ndufs1	Ndufs2	Ndufs3	Ndufs4	Ndufs7	Ndufs8	Ndufv1	Ndufv2
GO:0042788	polysomal ribosome	16	30	9.17e-23	ENSMUSP00000004072	ENSMUSP00000017548	ENSMUSP00000026420	ENSMUSP00000031617	ENSMUSP00000038352	ENSMUSP00000048469	ENSMUSP00000054490	ENSMUSP00000058432	ENSMUSP00000080523	ENSMUSP00000099595	ENSMUSP00000102213	ENSMUSP00000103365	ENSMUSP00000106014	ENSMUSP00000110013	ENSMUSP00000110886	ENSMUSP00000137631	Rpl10a	Rpl11	Rpl18	Rpl19	Rpl30	Rpl31	Rpl32	Rpl38	Rpl39	Rpl6	Rpl8	Rps21	Rps23	Rps26	Rps28	Rps29
GO:0098800	inner mitochondrial membrane protein complex	22	131	4.67e-22	ENSMUSP00000000090	ENSMUSP00000005647	ENSMUSP00000013737	ENSMUSP00000022286	ENSMUSP00000022980	ENSMUSP00000023085	ENSMUSP00000023210	ENSMUSP00000026222	ENSMUSP00000027111	ENSMUSP00000027478	ENSMUSP00000033157	ENSMUSP00000033176	ENSMUSP00000042967	ENSMUSP00000043543	ENSMUSP00000065352	ENSMUSP00000074600	ENSMUSP00000079944	ENSMUSP00000085523	ENSMUSP00000101003	ENSMUSP00000105796	ENSMUSP00000121557	ENSMUSP00000136313	Cox5a	Cox5b	Cyc1	Ndufa10	Ndufa12	Ndufa13	Ndufa6	Ndufa8	Ndufa9	Ndufab1	Ndufb10	Ndufb8	Ndufb9	Ndufs1	Ndufs2	Ndufs3	Ndufs4	Ndufs7	Ndufs8	Ndufv1	Ndufv2	Uqcrc2
GO:0043232	intracellular non-membrane-bounded organelle	79	3809	1.44e-21	ENSMUSP00000003521	ENSMUSP00000004072	ENSMUSP00000004554	ENSMUSP00000006496	ENSMUSP00000007012	ENSMUSP00000008812	ENSMUSP00000008826	ENSMUSP00000016072	ENSMUSP00000017548	ENSMUSP00000023502	ENSMUSP00000025511	ENSMUSP00000026420	ENSMUSP00000027050	ENSMUSP00000028062	ENSMUSP00000029382	ENSMUSP00000029699	ENSMUSP00000029722	ENSMUSP00000030769	ENSMUSP00000031617	ENSMUSP00000032998	ENSMUSP00000033699	ENSMUSP00000033776	ENSMUSP00000034966	ENSMUSP00000037613	ENSMUSP00000038352	ENSMUSP00000038580	ENSMUSP00000042123	ENSMUSP00000046506	ENSMUSP00000048153	ENSMUSP00000048469	ENSMUSP00000054490	ENSMUSP00000057543	ENSMUSP00000058432	ENSMUSP00000058919	ENSMUSP00000071616	ENSMUSP00000073175	ENSMUSP00000073880	ENSMUSP00000079163	ENSMUSP00000079180	ENSMUSP00000079340	ENSMUSP00000079628	ENSMUSP00000080354	ENSMUSP00000080523	ENSMUSP00000080854	ENSMUSP00000081474
GO:1990204	oxidoreductase complex	20	103	3.41e-21	ENSMUSP00000005647	ENSMUSP00000013737	ENSMUSP00000022286	ENSMUSP00000022980	ENSMUSP00000023085	ENSMUSP00000023210	ENSMUSP00000026222	ENSMUSP00000027111	ENSMUSP00000027478	ENSMUSP00000033157	ENSMUSP00000033176	ENSMUSP00000042967	ENSMUSP00000043543	ENSMUSP00000065352	ENSMUSP00000074600	ENSMUSP00000085523	ENSMUSP00000101003	ENSMUSP00000105796	ENSMUSP00000121557	ENSMUSP00000136313	Cyc1	Ndufa10	Ndufa12	Ndufa13	Ndufa6	Ndufa8	Ndufa9	Ndufab1	Ndufb10	Ndufb8	Ndufb9	Ndufs1	Ndufs2	Ndufs3	Ndufs4	Ndufs7	Ndufs8	Ndufv1	Ndufv2	Uqcrc2
GO:0005838	proteasome regulatory particle	14	22	8.21e-21	ENSMUSP00000017365	ENSMUSP00000017572	ENSMUSP00000021049	ENSMUSP00000021063	ENSMUSP00000021595	ENSMUSP00000022256	ENSMUSP00000022380	ENSMUSP00000026560	ENSMUSP00000027432	ENSMUSP00000028278	ENSMUSP00000030769	ENSMUSP00000032824	ENSMUSP00000041968	ENSMUSP00000051657	Psmc1	Psmc2	Psmc4	Psmc5	Psmc6	Psmd1	Psmd11	Psmd12	Psmd13	Psmd14	Psmd3	Psmd6	Psmd7	Psmd8
GO:0043229	intracellular organelle	128	10645	3.59e-20	ENSMUSP00000000090	ENSMUSP00000003521	ENSMUSP00000003912	ENSMUSP00000004072	ENSMUSP00000004554	ENSMUSP00000005017	ENSMUSP00000005647	ENSMUSP00000006496	ENSMUSP00000007012	ENSMUSP00000008812	ENSMUSP00000008826	ENSMUSP00000013737	ENSMUSP00000014457	ENSMUSP00000016072	ENSMUSP00000017548	ENSMUSP00000019638	ENSMUSP00000021049	ENSMUSP00000021063	ENSMUSP00000021595	ENSMUSP00000022286	ENSMUSP00000022380	ENSMUSP00000022980	ENSMUSP00000023085	ENSMUSP00000023210	ENSMUSP00000023502	ENSMUSP00000025511	ENSMUSP00000025645	ENSMUSP00000025851	ENSMUSP00000026222	ENSMUSP00000026292	ENSMUSP00000026420	ENSMUSP00000026560	ENSMUSP00000027050	ENSMUSP00000027111	ENSMUSP00000027432	ENSMUSP00000027478	ENSMUSP00000028062	ENSMUSP00000028683	ENSMUSP00000028826	ENSMUSP00000029382	ENSMUSP00000029699	ENSMUSP00000029722	ENSMUSP00000030769	ENSMUSP00000031617	ENSMUSP00000031779
GO:0044464	cell part	143	14017	2.54e-19	ENSMUSP00000000090	ENSMUSP00000003521	ENSMUSP00000003912	ENSMUSP00000003947	ENSMUSP00000004072	ENSMUSP00000004140	ENSMUSP00000004554	ENSMUSP00000005017	ENSMUSP00000005647	ENSMUSP00000006496	ENSMUSP00000007012	ENSMUSP00000008812	ENSMUSP00000008826	ENSMUSP00000013737	ENSMUSP00000014457	ENSMUSP00000016072	ENSMUSP00000017365	ENSMUSP00000017548	ENSMUSP00000017572	ENSMUSP00000019638	ENSMUSP00000021049	ENSMUSP00000021063	ENSMUSP00000021595	ENSMUSP00000022256	ENSMUSP00000022286	ENSMUSP00000022380	ENSMUSP00000022980	ENSMUSP00000023085	ENSMUSP00000023210	ENSMUSP00000023502	ENSMUSP00000025511	ENSMUSP00000025645	ENSMUSP00000025851	ENSMUSP00000026222	ENSMUSP00000026292	ENSMUSP00000026420	ENSMUSP00000026560	ENSMUSP00000027050	ENSMUSP00000027111	ENSMUSP00000027432	ENSMUSP00000027478	ENSMUSP00000028062	ENSMUSP00000028278	ENSMUSP00000028681	ENSMUSP00000028683
GO:0005743	mitochondrial inner membrane	24	321	1.05e-16	ENSMUSP00000000090	ENSMUSP00000005647	ENSMUSP00000013737	ENSMUSP00000014457	ENSMUSP00000022286	ENSMUSP00000022980	ENSMUSP00000023085	ENSMUSP00000023210	ENSMUSP00000026222	ENSMUSP00000027111	ENSMUSP00000027478	ENSMUSP00000032998	ENSMUSP00000033157	ENSMUSP00000033176	ENSMUSP00000042967	ENSMUSP00000043543	ENSMUSP00000065352	ENSMUSP00000074600	ENSMUSP00000079944	ENSMUSP00000085523	ENSMUSP00000101003	ENSMUSP00000105796	ENSMUSP00000121557	ENSMUSP00000136313	Cox5a	Cox5b	Cox6c	Cyc1	Ndufa10	Ndufa12	Ndufa13	Ndufa6	Ndufa8	Ndufa9	Ndufab1	Ndufb10	Ndufb8	Ndufb9	Ndufs1	Ndufs2	Ndufs3	Ndufs4	Ndufs7	Ndufs8	Ndufv1
GO:1902494	catalytic complex	40	1266	2.34e-15	ENSMUSP00000005647	ENSMUSP00000013737	ENSMUSP00000017365	ENSMUSP00000017572	ENSMUSP00000021049	ENSMUSP00000021063	ENSMUSP00000021595	ENSMUSP00000022256	ENSMUSP00000022286	ENSMUSP00000022380	ENSMUSP00000022980	ENSMUSP00000023085	ENSMUSP00000023210	ENSMUSP00000023502	ENSMUSP00000026222	ENSMUSP00000026560	ENSMUSP00000027111	ENSMUSP00000027432	ENSMUSP00000027478	ENSMUSP00000028278	ENSMUSP00000030769	ENSMUSP00000032824	ENSMUSP00000033157	ENSMUSP00000033176	ENSMUSP00000033776	ENSMUSP00000041968	ENSMUSP00000042967	ENSMUSP00000043543	ENSMUSP00000048153	ENSMUSP00000051657	ENSMUSP00000057543	ENSMUSP00000065352	ENSMUSP00000074600	ENSMUSP00000076989	ENSMUSP00000085523	ENSMUSP00000086640	ENSMUSP00000101003	ENSMUSP00000105796	ENSMUSP00000121557	ENSMUSP00000136313	Cyc1	Dkc1	Gnai2	Hnrnph1	Ndufa10
GO:0005740	mitochondrial envelope	27	590	7.52e-14	ENSMUSP00000000090	ENSMUSP00000005647	ENSMUSP00000013737	ENSMUSP00000014457	ENSMUSP00000022286	ENSMUSP00000022980	ENSMUSP00000023085	ENSMUSP00000023210	ENSMUSP00000026222	ENSMUSP00000027111	ENSMUSP00000027478	ENSMUSP00000028683	ENSMUSP00000032998	ENSMUSP00000033157	ENSMUSP00000033176	ENSMUSP00000042967	ENSMUSP00000043543	ENSMUSP00000059419	ENSMUSP00000065352	ENSMUSP00000074600	ENSMUSP00000079944	ENSMUSP00000085523	ENSMUSP00000101003	ENSMUSP00000105796	ENSMUSP00000112259	ENSMUSP00000121557	ENSMUSP00000136313	Cfl1	Cox5a	Cox5b	Cox6c	Cyc1	Ndufa10	Ndufa12	Ndufa13	Ndufa6	Ndufa8	Ndufa9	Ndufab1	Ndufb10	Ndufb8	Ndufb9	Ndufs1	Ndufs2	Ndufs3
GO:0031966	mitochondrial membrane	26	539	7.52e-14	ENSMUSP00000000090	ENSMUSP00000005647	ENSMUSP00000013737	ENSMUSP00000014457	ENSMUSP00000022286	ENSMUSP00000022980	ENSMUSP00000023085	ENSMUSP00000023210	ENSMUSP00000026222	ENSMUSP00000027111	ENSMUSP00000027478	ENSMUSP00000032998	ENSMUSP00000033157	ENSMUSP00000033176	ENSMUSP00000042967	ENSMUSP00000043543	ENSMUSP00000059419	ENSMUSP00000065352	ENSMUSP00000074600	ENSMUSP00000079944	ENSMUSP00000085523	ENSMUSP00000101003	ENSMUSP00000105796	ENSMUSP00000112259	ENSMUSP00000121557	ENSMUSP00000136313	Cfl1	Cox5a	Cox5b	Cox6c	Cyc1	Ndufa10	Ndufa12	Ndufa13	Ndufa6	Ndufa8	Ndufa9	Ndufab1	Ndufb10	Ndufb8	Ndufb9	Ndufs1	Ndufs2	Ndufs3	Ndufs4
GO:0044429	mitochondrial part	29	854	9.15e-12	ENSMUSP00000000090	ENSMUSP00000005647	ENSMUSP00000007012	ENSMUSP00000013737	ENSMUSP00000014457	ENSMUSP00000022286	ENSMUSP00000022980	ENSMUSP00000023085	ENSMUSP00000023210	ENSMUSP00000026222	ENSMUSP00000027111	ENSMUSP00000027478	ENSMUSP00000028683	ENSMUSP00000032998	ENSMUSP00000033157	ENSMUSP00000033176	ENSMUSP00000042967	ENSMUSP00000043543	ENSMUSP00000059419	ENSMUSP00000065352	ENSMUSP00000074600	ENSMUSP00000074724	ENSMUSP00000079944	ENSMUSP00000085523	ENSMUSP00000101003	ENSMUSP00000105796	ENSMUSP00000112259	ENSMUSP00000121557	ENSMUSP00000136313	Cfl1	Cox5a	Cox5b	Cox6c	Cyc1	Hspe1	Ndufa10	Ndufa12	Ndufa13	Ndufa6	Ndufa8	Ndufa9	Ndufab1	Ndufb10	Ndufb8	Ndufb9
GO:0070013	intracellular organelle lumen	62	3882	8.12e-11	ENSMUSP00000003912	ENSMUSP00000005017	ENSMUSP00000005647	ENSMUSP00000006496	ENSMUSP00000007012	ENSMUSP00000013737	ENSMUSP00000019638	ENSMUSP00000021049	ENSMUSP00000021063	ENSMUSP00000021595	ENSMUSP00000022380	ENSMUSP00000025511	ENSMUSP00000025851	ENSMUSP00000026292	ENSMUSP00000027050	ENSMUSP00000027111	ENSMUSP00000027478	ENSMUSP00000028062	ENSMUSP00000028683	ENSMUSP00000029382	ENSMUSP00000029699	ENSMUSP00000029722	ENSMUSP00000030769	ENSMUSP00000031617	ENSMUSP00000031779	ENSMUSP00000032824	ENSMUSP00000032998	ENSMUSP00000033157	ENSMUSP00000033176	ENSMUSP00000033699	ENSMUSP00000033776	ENSMUSP00000037613	ENSMUSP00000038580	ENSMUSP00000041968	ENSMUSP00000048153	ENSMUSP00000048416	ENSMUSP00000057543	ENSMUSP00000065352	ENSMUSP00000073175	ENSMUSP00000073880	ENSMUSP00000074724	ENSMUSP00000076989	ENSMUSP00000079180	ENSMUSP00000080354	ENSMUSP00000080854
GO:0043231	intracellular membrane-bounded organelle	103	9088	8.4e-11	ENSMUSP00000000090	ENSMUSP00000003912	ENSMUSP00000005017	ENSMUSP00000005647	ENSMUSP00000006496	ENSMUSP00000007012	ENSMUSP00000008812	ENSMUSP00000008826	ENSMUSP00000013737	ENSMUSP00000014457	ENSMUSP00000016072	ENSMUSP00000019638	ENSMUSP00000021049	ENSMUSP00000021063	ENSMUSP00000021595	ENSMUSP00000022286	ENSMUSP00000022380	ENSMUSP00000022980	ENSMUSP00000023085	ENSMUSP00000023210	ENSMUSP00000025511	ENSMUSP00000025645	ENSMUSP00000025851	ENSMUSP00000026222	ENSMUSP00000026292	ENSMUSP00000026420	ENSMUSP00000026560	ENSMUSP00000027050	ENSMUSP00000027111	ENSMUSP00000027432	ENSMUSP00000027478	ENSMUSP00000028062	ENSMUSP00000028683	ENSMUSP00000029382	ENSMUSP00000029699	ENSMUSP00000029722	ENSMUSP00000030769	ENSMUSP00000031617	ENSMUSP00000031779	ENSMUSP00000032824	ENSMUSP00000032998	ENSMUSP00000033157	ENSMUSP00000033176	ENSMUSP00000033699	ENSMUSP00000033776
GO:0031967	organelle envelope	30	1015	9.33e-11	ENSMUSP00000000090	ENSMUSP00000003912	ENSMUSP00000005647	ENSMUSP00000013737	ENSMUSP00000014457	ENSMUSP00000022286	ENSMUSP00000022980	ENSMUSP00000023085	ENSMUSP00000023210	ENSMUSP00000026222	ENSMUSP00000027111	ENSMUSP00000027478	ENSMUSP00000028683	ENSMUSP00000029699	ENSMUSP00000032998	ENSMUSP00000033157	ENSMUSP00000033176	ENSMUSP00000042967	ENSMUSP00000043543	ENSMUSP00000059419	ENSMUSP00000065352	ENSMUSP00000074600	ENSMUSP00000079944	ENSMUSP00000085523	ENSMUSP00000099933	ENSMUSP00000101003	ENSMUSP00000105796	ENSMUSP00000112259	ENSMUSP00000121557	ENSMUSP00000136313	Calr	Cfl1	Cox5a	Cox5b	Cox6c	Cyc1	Lmna	Ndufa10	Ndufa12	Ndufa13	Ndufa6	Ndufa8	Ndufa9	Ndufab1	Ndufb10
GO:0031597	cytosolic proteasome complex	7	12	1.64e-10	ENSMUSP00000021049	ENSMUSP00000021595	ENSMUSP00000022380	ENSMUSP00000027432	ENSMUSP00000028278	ENSMUSP00000030769	ENSMUSP00000032824	Psmc1	Psmc2	Psmc4	Psmc5	Psmc6	Psmd1	Psmd14
GO:0043227	membrane-bounded organelle	105	9775	1.34e-09	ENSMUSP00000000090	ENSMUSP00000003912	ENSMUSP00000005017	ENSMUSP00000005647	ENSMUSP00000006496	ENSMUSP00000007012	ENSMUSP00000008812	ENSMUSP00000008826	ENSMUSP00000013737	ENSMUSP00000014457	ENSMUSP00000016072	ENSMUSP00000019638	ENSMUSP00000021049	ENSMUSP00000021063	ENSMUSP00000021595	ENSMUSP00000022286	ENSMUSP00000022380	ENSMUSP00000022980	ENSMUSP00000023085	ENSMUSP00000023210	ENSMUSP00000023502	ENSMUSP00000025511	ENSMUSP00000025645	ENSMUSP00000025851	ENSMUSP00000026222	ENSMUSP00000026292	ENSMUSP00000026420	ENSMUSP00000026560	ENSMUSP00000027050	ENSMUSP00000027111	ENSMUSP00000027432	ENSMUSP00000027478	ENSMUSP00000028062	ENSMUSP00000028683	ENSMUSP00000028826	ENSMUSP00000029382	ENSMUSP00000029699	ENSMUSP00000029722	ENSMUSP00000030769	ENSMUSP00000031617	ENSMUSP00000031779	ENSMUSP00000032824	ENSMUSP00000032998	ENSMUSP00000033157	ENSMUSP00000033176
GO:0008541	proteasome regulatory particle	lid subcomplex	6	8	1.49e-09	ENSMUSP00000017365	ENSMUSP00000017572	ENSMUSP00000021063	ENSMUSP00000026560	ENSMUSP00000028278	ENSMUSP00000051657	Psmd11	Psmd12	Psmd13	Psmd14	Psmd3	Psmd8
GO:0031595	nuclear proteasome complex	6	8	1.49e-09	ENSMUSP00000021049	ENSMUSP00000021063	ENSMUSP00000021595	ENSMUSP00000022380	ENSMUSP00000030769	ENSMUSP00000032824	Psmc1	Psmc2	Psmc4	Psmc5	Psmc6	Psmd12
GO:0005730	nucleolus	26	878	2.24e-09	ENSMUSP00000006496	ENSMUSP00000025511	ENSMUSP00000029382	ENSMUSP00000029722	ENSMUSP00000031617	ENSMUSP00000032998	ENSMUSP00000033699	ENSMUSP00000033776	ENSMUSP00000037613	ENSMUSP00000038580	ENSMUSP00000073175	ENSMUSP00000073880	ENSMUSP00000079180	ENSMUSP00000080354	ENSMUSP00000080854	ENSMUSP00000085986	ENSMUSP00000099435	ENSMUSP00000099595	ENSMUSP00000099878	ENSMUSP00000099933	ENSMUSP00000103365	ENSMUSP00000104067	ENSMUSP00000110532	ENSMUSP00000126294	ENSMUSP00000137631	ENSMUSP00000140250	Arfgef1	Dkc1	Fbl	Flna	Nop58	Ppid	Rpl11	Rpl18	Rpl23	Rpl26	Rpl3	Rpl31	Rpl5	Rpl6	Rps10	Rps13	Rps14	Rps19	Rps25
GO:0031981	nuclear lumen	54	3386	3.17e-09	ENSMUSP00000005017	ENSMUSP00000005647	ENSMUSP00000006496	ENSMUSP00000013737	ENSMUSP00000019638	ENSMUSP00000021049	ENSMUSP00000021063	ENSMUSP00000021595	ENSMUSP00000022380	ENSMUSP00000025511	ENSMUSP00000025851	ENSMUSP00000026292	ENSMUSP00000027050	ENSMUSP00000028062	ENSMUSP00000029382	ENSMUSP00000029699	ENSMUSP00000029722	ENSMUSP00000030769	ENSMUSP00000031617	ENSMUSP00000032824	ENSMUSP00000032998	ENSMUSP00000033157	ENSMUSP00000033176	ENSMUSP00000033699	ENSMUSP00000033776	ENSMUSP00000037613	ENSMUSP00000038580	ENSMUSP00000041968	ENSMUSP00000048153	ENSMUSP00000048416	ENSMUSP00000057543	ENSMUSP00000073175	ENSMUSP00000073880	ENSMUSP00000076989	ENSMUSP00000079180	ENSMUSP00000080354	ENSMUSP00000080854	ENSMUSP00000085523	ENSMUSP00000085986	ENSMUSP00000092502	ENSMUSP00000099435	ENSMUSP00000099595	ENSMUSP00000099878	ENSMUSP00000099909	ENSMUSP00000099933
GO:0098796	membrane protein complex	27	1009	8.19e-09	ENSMUSP00000000090	ENSMUSP00000003912	ENSMUSP00000005647	ENSMUSP00000013737	ENSMUSP00000022286	ENSMUSP00000022980	ENSMUSP00000023085	ENSMUSP00000023210	ENSMUSP00000023502	ENSMUSP00000026222	ENSMUSP00000027111	ENSMUSP00000027478	ENSMUSP00000028683	ENSMUSP00000033157	ENSMUSP00000033176	ENSMUSP00000042967	ENSMUSP00000043543	ENSMUSP00000057543	ENSMUSP00000065352	ENSMUSP00000074600	ENSMUSP00000079944	ENSMUSP00000085523	ENSMUSP00000100026	ENSMUSP00000101003	ENSMUSP00000105796	ENSMUSP00000121557	ENSMUSP00000136313	Calr	Cntfr	Cox5a	Cox5b	Cyc1	Gnai2	Ndufa10	Ndufa12	Ndufa13	Ndufa6	Ndufa8	Ndufa9	Ndufab1	Ndufb10	Ndufb8	Ndufb9	Ndufs1	Ndufs2
GO:0008540	proteasome regulatory particle	base subcomplex	6	12	8.25e-09	ENSMUSP00000021049	ENSMUSP00000021595	ENSMUSP00000022380	ENSMUSP00000027432	ENSMUSP00000030769	ENSMUSP00000032824	Psmc1	Psmc2	Psmc4	Psmc5	Psmc6	Psmd1
GO:0005739	mitochondrion	30	1312	3.05e-08	ENSMUSP00000000090	ENSMUSP00000005647	ENSMUSP00000007012	ENSMUSP00000013737	ENSMUSP00000014457	ENSMUSP00000022286	ENSMUSP00000022980	ENSMUSP00000023085	ENSMUSP00000023210	ENSMUSP00000026222	ENSMUSP00000027111	ENSMUSP00000027478	ENSMUSP00000028683	ENSMUSP00000029382	ENSMUSP00000032998	ENSMUSP00000033157	ENSMUSP00000033176	ENSMUSP00000042967	ENSMUSP00000043543	ENSMUSP00000059419	ENSMUSP00000065352	ENSMUSP00000074600	ENSMUSP00000074724	ENSMUSP00000079944	ENSMUSP00000085523	ENSMUSP00000101003	ENSMUSP00000105796	ENSMUSP00000112259	ENSMUSP00000121557	ENSMUSP00000136313	Cfl1	Cox5a	Cox5b	Cox6c	Cyc1	Hspe1	Ndufa10	Ndufa12	Ndufa13	Ndufa6	Ndufa8	Ndufa9	Ndufab1	Ndufb10	Ndufb8
GO:0005791	rough endoplasmic reticulum	10	110	4.82e-08	ENSMUSP00000026420	ENSMUSP00000031617	ENSMUSP00000034966	ENSMUSP00000038352	ENSMUSP00000054490	ENSMUSP00000058432	ENSMUSP00000090305	ENSMUSP00000095287	ENSMUSP00000103365	ENSMUSP00000110013	Rpl18	Rpl27	Rpl27-ps3	Rpl4	Rpl6	Rps21	Rps23	Rps26	Rps28	Rps29
GO:0044428	nuclear part	55	3798	6.26e-08	ENSMUSP00000003912	ENSMUSP00000005017	ENSMUSP00000005647	ENSMUSP00000006496	ENSMUSP00000013737	ENSMUSP00000019638	ENSMUSP00000021049	ENSMUSP00000021063	ENSMUSP00000021595	ENSMUSP00000022380	ENSMUSP00000025511	ENSMUSP00000025851	ENSMUSP00000026292	ENSMUSP00000027050	ENSMUSP00000028062	ENSMUSP00000029382	ENSMUSP00000029699	ENSMUSP00000029722	ENSMUSP00000030769	ENSMUSP00000031617	ENSMUSP00000032824	ENSMUSP00000032998	ENSMUSP00000033157	ENSMUSP00000033176	ENSMUSP00000033699	ENSMUSP00000033776	ENSMUSP00000037613	ENSMUSP00000038580	ENSMUSP00000041968	ENSMUSP00000048153	ENSMUSP00000048416	ENSMUSP00000057543	ENSMUSP00000073175	ENSMUSP00000073880	ENSMUSP00000076989	ENSMUSP00000079180	ENSMUSP00000080354	ENSMUSP00000080854	ENSMUSP00000085523	ENSMUSP00000085986	ENSMUSP00000092502	ENSMUSP00000099435	ENSMUSP00000099595	ENSMUSP00000099878	ENSMUSP00000099909
GO:0098556	cytoplasmic side of rough endoplasmic reticulum membrane	5	8	8.4e-08	ENSMUSP00000026420	ENSMUSP00000038352	ENSMUSP00000090305	ENSMUSP00000095287	ENSMUSP00000110013	Rpl27	Rpl27-ps3	Rps26	Rps28	Rps29
GO:0043209	myelin sheath	12	212	2.14e-07	ENSMUSP00000000090	ENSMUSP00000004140	ENSMUSP00000005647	ENSMUSP00000007012	ENSMUSP00000027111	ENSMUSP00000027478	ENSMUSP00000028683	ENSMUSP00000033176	ENSMUSP00000079944	ENSMUSP00000099909	ENSMUSP00000120096	ENSMUSP00000121557	Cox5a	Cox5b	Gstm1	Ndufa10	Ndufs1	Ndufs3	Ndufv2	Pdia3	Rps27a	Sod2	Uba52	Uqcrc2
GO:0031090	organelle membrane	41	2740	3.96e-06	ENSMUSP00000000090	ENSMUSP00000003912	ENSMUSP00000005647	ENSMUSP00000013737	ENSMUSP00000014457	ENSMUSP00000016072	ENSMUSP00000022286	ENSMUSP00000022980	ENSMUSP00000023085	ENSMUSP00000023210	ENSMUSP00000023502	ENSMUSP00000025645	ENSMUSP00000026222	ENSMUSP00000026420	ENSMUSP00000027111	ENSMUSP00000027478	ENSMUSP00000028683	ENSMUSP00000029699	ENSMUSP00000031779	ENSMUSP00000032998	ENSMUSP00000033157	ENSMUSP00000033176	ENSMUSP00000038352	ENSMUSP00000042967	ENSMUSP00000043543	ENSMUSP00000059419	ENSMUSP00000065352	ENSMUSP00000074600	ENSMUSP00000077594	ENSMUSP00000079944	ENSMUSP00000085523	ENSMUSP00000085986	ENSMUSP00000090305	ENSMUSP00000095287	ENSMUSP00000099933	ENSMUSP00000101003	ENSMUSP00000105796	ENSMUSP00000110013	ENSMUSP00000112259	ENSMUSP00000121557	ENSMUSP00000136313	Arfgef1	Calr	Calu	Cfl1
GO:0005634	nucleus	69	6086	6.26e-06	ENSMUSP00000003912	ENSMUSP00000005017	ENSMUSP00000005647	ENSMUSP00000006496	ENSMUSP00000008812	ENSMUSP00000008826	ENSMUSP00000013737	ENSMUSP00000019638	ENSMUSP00000021049	ENSMUSP00000021063	ENSMUSP00000021595	ENSMUSP00000022380	ENSMUSP00000025511	ENSMUSP00000025851	ENSMUSP00000026292	ENSMUSP00000026560	ENSMUSP00000027050	ENSMUSP00000027432	ENSMUSP00000028062	ENSMUSP00000028683	ENSMUSP00000029382	ENSMUSP00000029699	ENSMUSP00000029722	ENSMUSP00000030769	ENSMUSP00000031617	ENSMUSP00000032824	ENSMUSP00000032998	ENSMUSP00000033157	ENSMUSP00000033176	ENSMUSP00000033699	ENSMUSP00000033776	ENSMUSP00000034588	ENSMUSP00000034966	ENSMUSP00000037613	ENSMUSP00000038580	ENSMUSP00000041968	ENSMUSP00000048153	ENSMUSP00000048416	ENSMUSP00000051657	ENSMUSP00000057543	ENSMUSP00000073175	ENSMUSP00000073880	ENSMUSP00000076989	ENSMUSP00000078132	ENSMUSP00000079163
GO:0005732	small nucleolar ribonucleoprotein complex	4	22	0.00012	ENSMUSP00000033776	ENSMUSP00000037613	ENSMUSP00000038580	ENSMUSP00000140250	Dkc1	Fbl	Nop58	Rrp9
GO:0005783	endoplasmic reticulum	26	1574	0.00012	ENSMUSP00000003912	ENSMUSP00000008826	ENSMUSP00000016072	ENSMUSP00000025645	ENSMUSP00000026222	ENSMUSP00000026420	ENSMUSP00000028683	ENSMUSP00000029722	ENSMUSP00000031617	ENSMUSP00000031779	ENSMUSP00000032998	ENSMUSP00000034966	ENSMUSP00000038352	ENSMUSP00000040840	ENSMUSP00000054490	ENSMUSP00000058432	ENSMUSP00000077594	ENSMUSP00000080854	ENSMUSP00000086614	ENSMUSP00000090305	ENSMUSP00000095287	ENSMUSP00000099757	ENSMUSP00000099878	ENSMUSP00000103365	ENSMUSP00000110013	ENSMUSP00000114705	Apmap	Calr	Calu	Dbi	Ndufb8	Pdia3	Rpl10	Rpl18	Rpl27	Rpl27-ps3	Rpl34	Rpl4	Rpl5	Rpl6	Rps21	Rps23	Rps26	Rps28	Rps29
GO:0031428	box C/D snoRNP complex	3	8	0.00022	ENSMUSP00000037613	ENSMUSP00000038580	ENSMUSP00000140250	Fbl	Nop58	Rrp9
GO:0070069	cytochrome complex	4	31	0.0004	ENSMUSP00000000090	ENSMUSP00000023210	ENSMUSP00000033176	ENSMUSP00000079944	Cox5a	Cox5b	Cyc1	Uqcrc2
GO:0032040	small-subunit processome	4	33	0.0005	ENSMUSP00000037613	ENSMUSP00000038580	ENSMUSP00000073880	ENSMUSP00000140250	Fbl	Nop58	Rps7	Rrp9
GO:0017101	aminoacyl-tRNA synthetase multienzyme complex	3	13	0.0007	ENSMUSP00000045841	ENSMUSP00000080854	ENSMUSP00000132082	Eprs	Iars	Rpl5
GO:0005751	mitochondrial respiratory chain complex IV	3	17	0.0014	ENSMUSP00000000090	ENSMUSP00000033176	ENSMUSP00000079944	Cox5a	Cox5b	Uqcrc2
GO:0031672	A band	4	47	0.0017	ENSMUSP00000031617	ENSMUSP00000034966	ENSMUSP00000071616	ENSMUSP00000079163	Rpl15	Rpl4	Rpl6	Rpl7
GO:0005654	nucleoplasm	33	2648	0.0018	ENSMUSP00000005017	ENSMUSP00000005647	ENSMUSP00000013737	ENSMUSP00000019638	ENSMUSP00000021049	ENSMUSP00000021595	ENSMUSP00000025851	ENSMUSP00000026292	ENSMUSP00000027050	ENSMUSP00000029382	ENSMUSP00000029699	ENSMUSP00000033157	ENSMUSP00000033176	ENSMUSP00000033776	ENSMUSP00000037613	ENSMUSP00000041968	ENSMUSP00000048416	ENSMUSP00000057543	ENSMUSP00000073175	ENSMUSP00000076989	ENSMUSP00000080854	ENSMUSP00000085523	ENSMUSP00000085986	ENSMUSP00000092502	ENSMUSP00000099435	ENSMUSP00000099595	ENSMUSP00000099909	ENSMUSP00000099933	ENSMUSP00000104067	ENSMUSP00000105796	ENSMUSP00000120096	ENSMUSP00000137631	ENSMUSP00000140250	Arfgef1	Cops4	Cops5	Cops6	Dkc1	Dpp3	Fbl	Gnai2	Hdgf	Hnrnph1	Huwe1	Lmna
GO:0015030	Cajal body	4	51	0.0022	ENSMUSP00000033776	ENSMUSP00000037613	ENSMUSP00000099933	ENSMUSP00000140250	Dkc1	Fbl	Nop58	Xpo1
GO:0042824	MHC class I peptide loading complex	2	5	0.0038	ENSMUSP00000003912	ENSMUSP00000028683	Calr	Pdia3
GO:0033018	sarcoplasmic reticulum lumen	2	6	0.005	ENSMUSP00000003912	ENSMUSP00000031779	Calr	Calu
GO:0008180	COP9 signalosome	3	29	0.0052	ENSMUSP00000019638	ENSMUSP00000027050	ENSMUSP00000048416	Cops4	Cops5	Cops6
GO:0005790	smooth endoplasmic reticulum	3	33	0.0071	ENSMUSP00000003912	ENSMUSP00000028683	ENSMUSP00000077594	Calr	Pdia3	Rtn1
GO:0098562	cytoplasmic side of membrane	6	199	0.0106	ENSMUSP00000026420	ENSMUSP00000038352	ENSMUSP00000057543	ENSMUSP00000090305	ENSMUSP00000095287	ENSMUSP00000110013	Gnai2	Rpl27	Rpl27-ps3	Rps26	Rps28	Rps29
GO:0005750	mitochondrial respiratory chain complex III	2	11	0.0128	ENSMUSP00000023210	ENSMUSP00000033176	Cyc1	Uqcrc2
GO:0043292	contractile fiber	6	230	0.0202	ENSMUSP00000031617	ENSMUSP00000033699	ENSMUSP00000034966	ENSMUSP00000071616	ENSMUSP00000079163	ENSMUSP00000114705	Dbi	Flna	Rpl15	Rpl4	Rpl6	Rpl7
GO:0016363	nuclear matrix	4	104	0.0229	ENSMUSP00000028062	ENSMUSP00000029699	ENSMUSP00000085986	ENSMUSP00000112259	Arfgef1	Cfl1	Lmna	Vim
GO:0030017	sarcomere	5	199	0.046	ENSMUSP00000031617	ENSMUSP00000033699	ENSMUSP00000034966	ENSMUSP00000071616	ENSMUSP00000079163	Flna	Rpl15	Rpl4	Rpl6	Rpl7
[truncated: 241 more columns]

## Sheet: Biological Processes
#term ID	term description	observed gene count	background gene count	false discovery rate	matching proteins in your network (IDs)	matching proteins in your network (labels)
GO:0006412	translation	60	313	6.82e-64	ENSMUSP00000003521	ENSMUSP00000004072	ENSMUSP00000004554	ENSMUSP00000006496	ENSMUSP00000008812	ENSMUSP00000008826	ENSMUSP00000016072	ENSMUSP00000017548	ENSMUSP00000025511	ENSMUSP00000026420	ENSMUSP00000029722	ENSMUSP00000031617	ENSMUSP00000032998	ENSMUSP00000034966	ENSMUSP00000038352	ENSMUSP00000045841	ENSMUSP00000046506	ENSMUSP00000048469	ENSMUSP00000054490	ENSMUSP00000058432	ENSMUSP00000058919	ENSMUSP00000071616	ENSMUSP00000073175	ENSMUSP00000073880	ENSMUSP00000079163	ENSMUSP00000079340	ENSMUSP00000079628	ENSMUSP00000080354	ENSMUSP00000080523	ENSMUSP00000080854	ENSMUSP00000081474	ENSMUSP00000086614	ENSMUSP00000090305	ENSMUSP00000092502	ENSMUSP00000095287	ENSMUSP00000099435	ENSMUSP00000099595	ENSMUSP00000099757	ENSMUSP00000099878	ENSMUSP00000099909	ENSMUSP00000102213	ENSMUSP00000103365	ENSMUSP00000103940	ENSMUSP00000104067	ENSMUSP00000106014
GO:0006518	peptide metabolic process	62	440	2.5e-59	ENSMUSP00000003521	ENSMUSP00000004072	ENSMUSP00000004140	ENSMUSP00000004554	ENSMUSP00000006496	ENSMUSP00000007012	ENSMUSP00000008812	ENSMUSP00000008826	ENSMUSP00000016072	ENSMUSP00000017548	ENSMUSP00000025511	ENSMUSP00000026420	ENSMUSP00000029722	ENSMUSP00000031617	ENSMUSP00000032998	ENSMUSP00000034966	ENSMUSP00000038352	ENSMUSP00000045841	ENSMUSP00000046506	ENSMUSP00000048469	ENSMUSP00000054490	ENSMUSP00000058432	ENSMUSP00000058919	ENSMUSP00000071616	ENSMUSP00000073175	ENSMUSP00000073880	ENSMUSP00000079163	ENSMUSP00000079340	ENSMUSP00000079628	ENSMUSP00000080354	ENSMUSP00000080523	ENSMUSP00000080854	ENSMUSP00000081474	ENSMUSP00000086614	ENSMUSP00000090305	ENSMUSP00000092502	ENSMUSP00000095287	ENSMUSP00000099435	ENSMUSP00000099595	ENSMUSP00000099757	ENSMUSP00000099878	ENSMUSP00000099909	ENSMUSP00000102213	ENSMUSP00000103365	ENSMUSP00000103940
GO:0043603	cellular amide metabolic process	63	644	1.49e-51	ENSMUSP00000003521	ENSMUSP00000004072	ENSMUSP00000004140	ENSMUSP00000004554	ENSMUSP00000006496	ENSMUSP00000007012	ENSMUSP00000008812	ENSMUSP00000008826	ENSMUSP00000016072	ENSMUSP00000017548	ENSMUSP00000025511	ENSMUSP00000026420	ENSMUSP00000029722	ENSMUSP00000031617	ENSMUSP00000032998	ENSMUSP00000034966	ENSMUSP00000038352	ENSMUSP00000045841	ENSMUSP00000046506	ENSMUSP00000048469	ENSMUSP00000054490	ENSMUSP00000058432	ENSMUSP00000058919	ENSMUSP00000071616	ENSMUSP00000073175	ENSMUSP00000073880	ENSMUSP00000079163	ENSMUSP00000079340	ENSMUSP00000079628	ENSMUSP00000080354	ENSMUSP00000080523	ENSMUSP00000080854	ENSMUSP00000081474	ENSMUSP00000086614	ENSMUSP00000090305	ENSMUSP00000092502	ENSMUSP00000095287	ENSMUSP00000099435	ENSMUSP00000099595	ENSMUSP00000099757	ENSMUSP00000099878	ENSMUSP00000099909	ENSMUSP00000102213	ENSMUSP00000103365	ENSMUSP00000103940
GO:0002181	cytoplasmic translation	29	55	5.23e-40	ENSMUSP00000004072	ENSMUSP00000017548	ENSMUSP00000026420	ENSMUSP00000029722	ENSMUSP00000031617	ENSMUSP00000032998	ENSMUSP00000034966	ENSMUSP00000038352	ENSMUSP00000048469	ENSMUSP00000054490	ENSMUSP00000058432	ENSMUSP00000071616	ENSMUSP00000073175	ENSMUSP00000073880	ENSMUSP00000079163	ENSMUSP00000079340	ENSMUSP00000080523	ENSMUSP00000081474	ENSMUSP00000092502	ENSMUSP00000099595	ENSMUSP00000102213	ENSMUSP00000103365	ENSMUSP00000106014	ENSMUSP00000110013	ENSMUSP00000110731	ENSMUSP00000110886	ENSMUSP00000118787	ENSMUSP00000120528	ENSMUSP00000137631	Rpl10a	Rpl11	Rpl15	Rpl18	Rpl19	Rpl22	Rpl26	Rpl30	Rpl31	Rpl32	Rpl35a	Rpl36	Rpl38	Rpl39	Rpl4	Rpl6
GO:1901566	organonitrogen compound biosynthetic process	63	1122	6.76e-38	ENSMUSP00000003521	ENSMUSP00000004072	ENSMUSP00000004554	ENSMUSP00000006496	ENSMUSP00000008812	ENSMUSP00000008826	ENSMUSP00000016072	ENSMUSP00000017548	ENSMUSP00000023210	ENSMUSP00000025511	ENSMUSP00000026420	ENSMUSP00000029722	ENSMUSP00000031617	ENSMUSP00000032998	ENSMUSP00000034588	ENSMUSP00000034966	ENSMUSP00000038352	ENSMUSP00000045841	ENSMUSP00000046506	ENSMUSP00000048469	ENSMUSP00000054490	ENSMUSP00000058432	ENSMUSP00000058919	ENSMUSP00000071616	ENSMUSP00000073175	ENSMUSP00000073880	ENSMUSP00000079163	ENSMUSP00000079340	ENSMUSP00000079628	ENSMUSP00000079944	ENSMUSP00000080354	ENSMUSP00000080523	ENSMUSP00000080854	ENSMUSP00000081474	ENSMUSP00000086614	ENSMUSP00000090305	ENSMUSP00000092502	ENSMUSP00000095287	ENSMUSP00000099435	ENSMUSP00000099595	ENSMUSP00000099757	ENSMUSP00000099878	ENSMUSP00000099909	ENSMUSP00000102213	ENSMUSP00000103365
GO:1901564	organonitrogen compound metabolic process	106	4480	2.53e-37	ENSMUSP00000000090	ENSMUSP00000003521	ENSMUSP00000004072	ENSMUSP00000004140	ENSMUSP00000004554	ENSMUSP00000006496	ENSMUSP00000007012	ENSMUSP00000008812	ENSMUSP00000008826	ENSMUSP00000013737	ENSMUSP00000016072	ENSMUSP00000017365	ENSMUSP00000017548	ENSMUSP00000017572	ENSMUSP00000019638	ENSMUSP00000021049	ENSMUSP00000021063	ENSMUSP00000021595	ENSMUSP00000022256	ENSMUSP00000022380	ENSMUSP00000022980	ENSMUSP00000023210	ENSMUSP00000025511	ENSMUSP00000025851	ENSMUSP00000026222	ENSMUSP00000026292	ENSMUSP00000026420	ENSMUSP00000026560	ENSMUSP00000027050	ENSMUSP00000027111	ENSMUSP00000027432	ENSMUSP00000027478	ENSMUSP00000028278	ENSMUSP00000028681	ENSMUSP00000028683	ENSMUSP00000029382	ENSMUSP00000029722	ENSMUSP00000030769	ENSMUSP00000031617	ENSMUSP00000032824	ENSMUSP00000032998	ENSMUSP00000033157	ENSMUSP00000033176	ENSMUSP00000034588	ENSMUSP00000034960
GO:0044267	cellular protein metabolic process	85	2995	2.33e-32	ENSMUSP00000003521	ENSMUSP00000004072	ENSMUSP00000004554	ENSMUSP00000006496	ENSMUSP00000008812	ENSMUSP00000008826	ENSMUSP00000016072	ENSMUSP00000017365	ENSMUSP00000017548	ENSMUSP00000017572	ENSMUSP00000019638	ENSMUSP00000021049	ENSMUSP00000021063	ENSMUSP00000021595	ENSMUSP00000022256	ENSMUSP00000022380	ENSMUSP00000025511	ENSMUSP00000026292	ENSMUSP00000026420	ENSMUSP00000026560	ENSMUSP00000027050	ENSMUSP00000027432	ENSMUSP00000028278	ENSMUSP00000029382	ENSMUSP00000029722	ENSMUSP00000030769	ENSMUSP00000031617	ENSMUSP00000032824	ENSMUSP00000032998	ENSMUSP00000033157	ENSMUSP00000033176	ENSMUSP00000034588	ENSMUSP00000034966	ENSMUSP00000037613	ENSMUSP00000038352	ENSMUSP00000041968	ENSMUSP00000045841	ENSMUSP00000046506	ENSMUSP00000048416	ENSMUSP00000048469	ENSMUSP00000051657	ENSMUSP00000054490	ENSMUSP00000058432	ENSMUSP00000058919	ENSMUSP00000071616
GO:0042254	ribosome biogenesis	35	252	1.09e-31	ENSMUSP00000004554	ENSMUSP00000008812	ENSMUSP00000008826	ENSMUSP00000025511	ENSMUSP00000031617	ENSMUSP00000033776	ENSMUSP00000037613	ENSMUSP00000038580	ENSMUSP00000048469	ENSMUSP00000058432	ENSMUSP00000071616	ENSMUSP00000073175	ENSMUSP00000073880	ENSMUSP00000079180	ENSMUSP00000079628	ENSMUSP00000080354	ENSMUSP00000080854	ENSMUSP00000086614	ENSMUSP00000090305	ENSMUSP00000092502	ENSMUSP00000095287	ENSMUSP00000099595	ENSMUSP00000099757	ENSMUSP00000099878	ENSMUSP00000099933	ENSMUSP00000102213	ENSMUSP00000103940	ENSMUSP00000104067	ENSMUSP00000110013	ENSMUSP00000110532	ENSMUSP00000110731	ENSMUSP00000125977	ENSMUSP00000131489	ENSMUSP00000132102	ENSMUSP00000140250	Dkc1	Fbl	Nop58	Rpl10	Rpl10a	Rpl11	Rpl14	Rpl26	Rpl27	Rpl27-ps3
GO:0019538	protein metabolic process	90	3580	4.62e-31	ENSMUSP00000003521	ENSMUSP00000004072	ENSMUSP00000004554	ENSMUSP00000006496	ENSMUSP00000008812	ENSMUSP00000008826	ENSMUSP00000016072	ENSMUSP00000017365	ENSMUSP00000017548	ENSMUSP00000017572	ENSMUSP00000019638	ENSMUSP00000021049	ENSMUSP00000021063	ENSMUSP00000021595	ENSMUSP00000022256	ENSMUSP00000022380	ENSMUSP00000025511	ENSMUSP00000025851	ENSMUSP00000026292	ENSMUSP00000026420	ENSMUSP00000026560	ENSMUSP00000027050	ENSMUSP00000027432	ENSMUSP00000028278	ENSMUSP00000028681	ENSMUSP00000028683	ENSMUSP00000029382	ENSMUSP00000029722	ENSMUSP00000030769	ENSMUSP00000031617	ENSMUSP00000032824	ENSMUSP00000032998	ENSMUSP00000033157	ENSMUSP00000033176	ENSMUSP00000034588	ENSMUSP00000034960	ENSMUSP00000034966	ENSMUSP00000037613	ENSMUSP00000038352	ENSMUSP00000041968	ENSMUSP00000045841	ENSMUSP00000046506	ENSMUSP00000048153	ENSMUSP00000048416	ENSMUSP00000048469
GO:0022613	ribonucleoprotein complex biogenesis	37	380	1.35e-28	ENSMUSP00000004554	ENSMUSP00000008812	ENSMUSP00000008826	ENSMUSP00000025511	ENSMUSP00000031617	ENSMUSP00000033776	ENSMUSP00000037613	ENSMUSP00000038580	ENSMUSP00000048153	ENSMUSP00000048469	ENSMUSP00000054490	ENSMUSP00000058432	ENSMUSP00000071616	ENSMUSP00000073175	ENSMUSP00000073880	ENSMUSP00000079180	ENSMUSP00000079628	ENSMUSP00000080354	ENSMUSP00000080854	ENSMUSP00000086614	ENSMUSP00000090305	ENSMUSP00000092502	ENSMUSP00000095287	ENSMUSP00000099595	ENSMUSP00000099757	ENSMUSP00000099878	ENSMUSP00000099933	ENSMUSP00000102213	ENSMUSP00000103940	ENSMUSP00000104067	ENSMUSP00000110013	ENSMUSP00000110532	ENSMUSP00000110731	ENSMUSP00000125977	ENSMUSP00000131489	ENSMUSP00000132102	ENSMUSP00000140250	Dkc1	Fbl	Nop58	Rbmxl1	Rpl10	Rpl10a	Rpl11	Rpl14
GO:0008152	metabolic process	124	8164	5.37e-28	ENSMUSP00000000090	ENSMUSP00000003521	ENSMUSP00000003947	ENSMUSP00000004072	ENSMUSP00000004140	ENSMUSP00000004554	ENSMUSP00000005017	ENSMUSP00000005647	ENSMUSP00000006496	ENSMUSP00000007012	ENSMUSP00000008812	ENSMUSP00000008826	ENSMUSP00000013737	ENSMUSP00000014457	ENSMUSP00000016072	ENSMUSP00000017365	ENSMUSP00000017548	ENSMUSP00000017572	ENSMUSP00000019638	ENSMUSP00000021049	ENSMUSP00000021063	ENSMUSP00000021595	ENSMUSP00000022256	ENSMUSP00000022286	ENSMUSP00000022380	ENSMUSP00000022980	ENSMUSP00000023085	ENSMUSP00000023210	ENSMUSP00000025511	ENSMUSP00000025851	ENSMUSP00000026222	ENSMUSP00000026292	ENSMUSP00000026420	ENSMUSP00000026560	ENSMUSP00000027050	ENSMUSP00000027111	ENSMUSP00000027432	ENSMUSP00000027478	ENSMUSP00000028278	ENSMUSP00000028681	ENSMUSP00000028683	ENSMUSP00000029382	ENSMUSP00000029722	ENSMUSP00000030769	ENSMUSP00000031617
GO:0006807	nitrogen compound metabolic process	113	6983	1.53e-25	ENSMUSP00000000090	ENSMUSP00000003521	ENSMUSP00000004072	ENSMUSP00000004140	ENSMUSP00000004554	ENSMUSP00000005017	ENSMUSP00000006496	ENSMUSP00000007012	ENSMUSP00000008812	ENSMUSP00000008826	ENSMUSP00000013737	ENSMUSP00000016072	ENSMUSP00000017365	ENSMUSP00000017548	ENSMUSP00000017572	ENSMUSP00000019638	ENSMUSP00000021049	ENSMUSP00000021063	ENSMUSP00000021595	ENSMUSP00000022256	ENSMUSP00000022380	ENSMUSP00000022980	ENSMUSP00000023210	ENSMUSP00000025511	ENSMUSP00000025851	ENSMUSP00000026222	ENSMUSP00000026292	ENSMUSP00000026420	ENSMUSP00000026560	ENSMUSP00000027050	ENSMUSP00000027111	ENSMUSP00000027432	ENSMUSP00000027478	ENSMUSP00000028278	ENSMUSP00000028681	ENSMUSP00000028683	ENSMUSP00000029382	ENSMUSP00000029722	ENSMUSP00000030769	ENSMUSP00000031617	ENSMUSP00000032824	ENSMUSP00000032998	ENSMUSP00000033157	ENSMUSP00000033176	ENSMUSP00000033699
GO:0044237	cellular metabolic process	115	7348	4.56e-25	ENSMUSP00000000090	ENSMUSP00000003521	ENSMUSP00000003947	ENSMUSP00000004072	ENSMUSP00000004140	ENSMUSP00000004554	ENSMUSP00000005017	ENSMUSP00000005647	ENSMUSP00000006496	ENSMUSP00000007012	ENSMUSP00000008812	ENSMUSP00000008826	ENSMUSP00000013737	ENSMUSP00000014457	ENSMUSP00000016072	ENSMUSP00000017365	ENSMUSP00000017548	ENSMUSP00000017572	ENSMUSP00000019638	ENSMUSP00000021049	ENSMUSP00000021063	ENSMUSP00000021595	ENSMUSP00000022256	ENSMUSP00000022286	ENSMUSP00000022380	ENSMUSP00000022980	ENSMUSP00000023210	ENSMUSP00000025511	ENSMUSP00000026222	ENSMUSP00000026292	ENSMUSP00000026420	ENSMUSP00000026560	ENSMUSP00000027050	ENSMUSP00000027111	ENSMUSP00000027432	ENSMUSP00000027478	ENSMUSP00000028278	ENSMUSP00000029382	ENSMUSP00000029722	ENSMUSP00000030769	ENSMUSP00000031617	ENSMUSP00000032824	ENSMUSP00000032998	ENSMUSP00000033157	ENSMUSP00000033176
GO:0034641	cellular nitrogen compound metabolic process	86	4247	1.71e-22	ENSMUSP00000000090	ENSMUSP00000003521	ENSMUSP00000004072	ENSMUSP00000004140	ENSMUSP00000004554	ENSMUSP00000005017	ENSMUSP00000006496	ENSMUSP00000007012	ENSMUSP00000008812	ENSMUSP00000008826	ENSMUSP00000013737	ENSMUSP00000016072	ENSMUSP00000017548	ENSMUSP00000022980	ENSMUSP00000023210	ENSMUSP00000025511	ENSMUSP00000026222	ENSMUSP00000026292	ENSMUSP00000026420	ENSMUSP00000027111	ENSMUSP00000027478	ENSMUSP00000028278	ENSMUSP00000029722	ENSMUSP00000031617	ENSMUSP00000032998	ENSMUSP00000033699	ENSMUSP00000033776	ENSMUSP00000034966	ENSMUSP00000036696	ENSMUSP00000037613	ENSMUSP00000038352	ENSMUSP00000038580	ENSMUSP00000042967	ENSMUSP00000045841	ENSMUSP00000046506	ENSMUSP00000048153	ENSMUSP00000048469	ENSMUSP00000054490	ENSMUSP00000058432	ENSMUSP00000058919	ENSMUSP00000065352	ENSMUSP00000071616	ENSMUSP00000073175	ENSMUSP00000073880	ENSMUSP00000076989
GO:0071704	organic substance metabolic process	114	7733	3.22e-22	ENSMUSP00000000090	ENSMUSP00000003521	ENSMUSP00000004072	ENSMUSP00000004140	ENSMUSP00000004554	ENSMUSP00000005017	ENSMUSP00000006496	ENSMUSP00000007012	ENSMUSP00000008812	ENSMUSP00000008826	ENSMUSP00000013737	ENSMUSP00000016072	ENSMUSP00000017365	ENSMUSP00000017548	ENSMUSP00000017572	ENSMUSP00000019638	ENSMUSP00000021049	ENSMUSP00000021063	ENSMUSP00000021595	ENSMUSP00000022256	ENSMUSP00000022380	ENSMUSP00000022980	ENSMUSP00000023210	ENSMUSP00000025511	ENSMUSP00000025851	ENSMUSP00000026222	ENSMUSP00000026292	ENSMUSP00000026420	ENSMUSP00000026560	ENSMUSP00000027050	ENSMUSP00000027111	ENSMUSP00000027432	ENSMUSP00000027478	ENSMUSP00000028278	ENSMUSP00000028681	ENSMUSP00000028683	ENSMUSP00000029382	ENSMUSP00000029722	ENSMUSP00000030769	ENSMUSP00000031617	ENSMUSP00000032824	ENSMUSP00000032998	ENSMUSP00000033157	ENSMUSP00000033176	ENSMUSP00000033699
GO:0006364	rRNA processing	24	176	3.53e-21	ENSMUSP00000025511	ENSMUSP00000033776	ENSMUSP00000037613	ENSMUSP00000038580	ENSMUSP00000048469	ENSMUSP00000058432	ENSMUSP00000071616	ENSMUSP00000073175	ENSMUSP00000073880	ENSMUSP00000079628	ENSMUSP00000080854	ENSMUSP00000090305	ENSMUSP00000095287	ENSMUSP00000099595	ENSMUSP00000099757	ENSMUSP00000099878	ENSMUSP00000103940	ENSMUSP00000104067	ENSMUSP00000110013	ENSMUSP00000110731	ENSMUSP00000125977	ENSMUSP00000131489	ENSMUSP00000132102	ENSMUSP00000140250	Dkc1	Fbl	Nop58	Rpl10a	Rpl11	Rpl14	Rpl26	Rpl27	Rpl27-ps3	Rpl35a	Rpl5	Rpl7	Rps14	Rps16	Rps17	Rps19	Rps21	Rps24	Rps27	Rps28	Rps6
GO:0044238	primary metabolic process	110	7426	6.72e-21	ENSMUSP00000000090	ENSMUSP00000003521	ENSMUSP00000004072	ENSMUSP00000004554	ENSMUSP00000005017	ENSMUSP00000006496	ENSMUSP00000008812	ENSMUSP00000008826	ENSMUSP00000013737	ENSMUSP00000016072	ENSMUSP00000017365	ENSMUSP00000017548	ENSMUSP00000017572	ENSMUSP00000019638	ENSMUSP00000021049	ENSMUSP00000021063	ENSMUSP00000021595	ENSMUSP00000022256	ENSMUSP00000022380	ENSMUSP00000022980	ENSMUSP00000023210	ENSMUSP00000025511	ENSMUSP00000025851	ENSMUSP00000026222	ENSMUSP00000026292	ENSMUSP00000026420	ENSMUSP00000026560	ENSMUSP00000027050	ENSMUSP00000027111	ENSMUSP00000027432	ENSMUSP00000027478	ENSMUSP00000028278	ENSMUSP00000028681	ENSMUSP00000028683	ENSMUSP00000029382	ENSMUSP00000029722	ENSMUSP00000030769	ENSMUSP00000031617	ENSMUSP00000032824	ENSMUSP00000032998	ENSMUSP00000033157	ENSMUSP00000033176	ENSMUSP00000033699	ENSMUSP00000033776	ENSMUSP00000034588
GO:0010467	gene expression	70	3013	3.32e-20	ENSMUSP00000003521	ENSMUSP00000004072	ENSMUSP00000004554	ENSMUSP00000005017	ENSMUSP00000006496	ENSMUSP00000008812	ENSMUSP00000008826	ENSMUSP00000016072	ENSMUSP00000017548	ENSMUSP00000025511	ENSMUSP00000026420	ENSMUSP00000029722	ENSMUSP00000031617	ENSMUSP00000032998	ENSMUSP00000033157	ENSMUSP00000033176	ENSMUSP00000033699	ENSMUSP00000033776	ENSMUSP00000034966	ENSMUSP00000037613	ENSMUSP00000038352	ENSMUSP00000038580	ENSMUSP00000045841	ENSMUSP00000046506	ENSMUSP00000048153	ENSMUSP00000048469	ENSMUSP00000054490	ENSMUSP00000058432	ENSMUSP00000058919	ENSMUSP00000071616	ENSMUSP00000073175	ENSMUSP00000073880	ENSMUSP00000076989	ENSMUSP00000079163	ENSMUSP00000079340	ENSMUSP00000079628	ENSMUSP00000080354	ENSMUSP00000080523	ENSMUSP00000080854	ENSMUSP00000081474	ENSMUSP00000086614	ENSMUSP00000090305	ENSMUSP00000092502	ENSMUSP00000095287	ENSMUSP00000099435
GO:0044271	cellular nitrogen compound biosynthetic process	67	2781	6.08e-20	ENSMUSP00000003521	ENSMUSP00000004072	ENSMUSP00000004554	ENSMUSP00000005017	ENSMUSP00000006496	ENSMUSP00000008812	ENSMUSP00000008826	ENSMUSP00000016072	ENSMUSP00000017548	ENSMUSP00000023210	ENSMUSP00000025511	ENSMUSP00000026420	ENSMUSP00000029722	ENSMUSP00000031617	ENSMUSP00000032998	ENSMUSP00000033699	ENSMUSP00000033776	ENSMUSP00000034966	ENSMUSP00000036696	ENSMUSP00000038352	ENSMUSP00000045841	ENSMUSP00000046506	ENSMUSP00000048153	ENSMUSP00000048469	ENSMUSP00000054490	ENSMUSP00000058432	ENSMUSP00000058919	ENSMUSP00000071616	ENSMUSP00000073175	ENSMUSP00000073880	ENSMUSP00000079163	ENSMUSP00000079340	ENSMUSP00000079628	ENSMUSP00000079944	ENSMUSP00000080354	ENSMUSP00000080523	ENSMUSP00000080854	ENSMUSP00000081474	ENSMUSP00000086614	ENSMUSP00000090305	ENSMUSP00000092502	ENSMUSP00000095287	ENSMUSP00000099435	ENSMUSP00000099595	ENSMUSP00000099757
GO:0034645	cellular macromolecule biosynthetic process	65	2778	1.59e-18	ENSMUSP00000003521	ENSMUSP00000004072	ENSMUSP00000004554	ENSMUSP00000005017	ENSMUSP00000006496	ENSMUSP00000008812	ENSMUSP00000008826	ENSMUSP00000016072	ENSMUSP00000017548	ENSMUSP00000025511	ENSMUSP00000026420	ENSMUSP00000029722	ENSMUSP00000031617	ENSMUSP00000032998	ENSMUSP00000033699	ENSMUSP00000033776	ENSMUSP00000034588	ENSMUSP00000034966	ENSMUSP00000038352	ENSMUSP00000045841	ENSMUSP00000046506	ENSMUSP00000048153	ENSMUSP00000048469	ENSMUSP00000054490	ENSMUSP00000058432	ENSMUSP00000058919	ENSMUSP00000071616	ENSMUSP00000073175	ENSMUSP00000073880	ENSMUSP00000079163	ENSMUSP00000079340	ENSMUSP00000079628	ENSMUSP00000080354	ENSMUSP00000080523	ENSMUSP00000080854	ENSMUSP00000081474	ENSMUSP00000086614	ENSMUSP00000090305	ENSMUSP00000092502	ENSMUSP00000095287	ENSMUSP00000099435	ENSMUSP00000099595	ENSMUSP00000099757	ENSMUSP00000099878	ENSMUSP00000099909
GO:0044260	cellular macromolecule metabolic process	89	5233	1.92e-18	ENSMUSP00000003521	ENSMUSP00000004072	ENSMUSP00000004554	ENSMUSP00000005017	ENSMUSP00000006496	ENSMUSP00000008812	ENSMUSP00000008826	ENSMUSP00000016072	ENSMUSP00000017365	ENSMUSP00000017548	ENSMUSP00000017572	ENSMUSP00000019638	ENSMUSP00000021049	ENSMUSP00000021063	ENSMUSP00000021595	ENSMUSP00000022256	ENSMUSP00000022380	ENSMUSP00000025511	ENSMUSP00000026292	ENSMUSP00000026420	ENSMUSP00000026560	ENSMUSP00000027050	ENSMUSP00000027432	ENSMUSP00000028278	ENSMUSP00000029382	ENSMUSP00000029722	ENSMUSP00000030769	ENSMUSP00000031617	ENSMUSP00000032824	ENSMUSP00000032998	ENSMUSP00000033157	ENSMUSP00000033176	ENSMUSP00000033699	ENSMUSP00000033776	ENSMUSP00000034588	ENSMUSP00000034966	ENSMUSP00000037613	ENSMUSP00000038352	ENSMUSP00000041968	ENSMUSP00000045841	ENSMUSP00000046506	ENSMUSP00000048153	ENSMUSP00000048416	ENSMUSP00000048469	ENSMUSP00000051657
GO:0044085	cellular component biogenesis	58	2213	2.43e-18	ENSMUSP00000003912	ENSMUSP00000004554	ENSMUSP00000007012	ENSMUSP00000008812	ENSMUSP00000008826	ENSMUSP00000017572	ENSMUSP00000022286	ENSMUSP00000022980	ENSMUSP00000025511	ENSMUSP00000026222	ENSMUSP00000026560	ENSMUSP00000027050	ENSMUSP00000027478	ENSMUSP00000029382	ENSMUSP00000031617	ENSMUSP00000032998	ENSMUSP00000033157	ENSMUSP00000033699	ENSMUSP00000033776	ENSMUSP00000034588	ENSMUSP00000037613	ENSMUSP00000038580	ENSMUSP00000043543	ENSMUSP00000048153	ENSMUSP00000048469	ENSMUSP00000051657	ENSMUSP00000054490	ENSMUSP00000058432	ENSMUSP00000065352	ENSMUSP00000071616	ENSMUSP00000073175	ENSMUSP00000073880	ENSMUSP00000074600	ENSMUSP00000079180	ENSMUSP00000079628	ENSMUSP00000080354	ENSMUSP00000080854	ENSMUSP00000085523	ENSMUSP00000086614	ENSMUSP00000090305	ENSMUSP00000092502	ENSMUSP00000095287	ENSMUSP00000099595	ENSMUSP00000099757	ENSMUSP00000099878
GO:0043170	macromolecule metabolic process	96	6225	1.11e-17	ENSMUSP00000003521	ENSMUSP00000004072	ENSMUSP00000004554	ENSMUSP00000005017	ENSMUSP00000006496	ENSMUSP00000008812	ENSMUSP00000008826	ENSMUSP00000016072	ENSMUSP00000017365	ENSMUSP00000017548	ENSMUSP00000017572	ENSMUSP00000019638	ENSMUSP00000021049	ENSMUSP00000021063	ENSMUSP00000021595	ENSMUSP00000022256	ENSMUSP00000022380	ENSMUSP00000025511	ENSMUSP00000025851	ENSMUSP00000026292	ENSMUSP00000026420	ENSMUSP00000026560	ENSMUSP00000027050	ENSMUSP00000027432	ENSMUSP00000028278	ENSMUSP00000028681	ENSMUSP00000028683	ENSMUSP00000029382	ENSMUSP00000029722	ENSMUSP00000030769	ENSMUSP00000031617	ENSMUSP00000032824	ENSMUSP00000032998	ENSMUSP00000033157	ENSMUSP00000033176	ENSMUSP00000033699	ENSMUSP00000033776	ENSMUSP00000034588	ENSMUSP00000034960	ENSMUSP00000034966	ENSMUSP00000037613	ENSMUSP00000038352	ENSMUSP00000038580	ENSMUSP00000041968	ENSMUSP00000045841
GO:0009058	biosynthetic process	73	3707	2.62e-17	ENSMUSP00000003521	ENSMUSP00000004072	ENSMUSP00000004554	ENSMUSP00000005017	ENSMUSP00000006496	ENSMUSP00000007012	ENSMUSP00000008812	ENSMUSP00000008826	ENSMUSP00000016072	ENSMUSP00000017548	ENSMUSP00000023210	ENSMUSP00000025511	ENSMUSP00000026420	ENSMUSP00000029722	ENSMUSP00000031617	ENSMUSP00000032998	ENSMUSP00000033157	ENSMUSP00000033699	ENSMUSP00000033776	ENSMUSP00000034588	ENSMUSP00000034966	ENSMUSP00000036696	ENSMUSP00000038352	ENSMUSP00000040840	ENSMUSP00000045841	ENSMUSP00000046506	ENSMUSP00000048153	ENSMUSP00000048469	ENSMUSP00000054490	ENSMUSP00000058432	ENSMUSP00000058919	ENSMUSP00000071616	ENSMUSP00000073175	ENSMUSP00000073880	ENSMUSP00000079163	ENSMUSP00000079340	ENSMUSP00000079628	ENSMUSP00000079944	ENSMUSP00000080354	ENSMUSP00000080523	ENSMUSP00000080854	ENSMUSP00000081474	ENSMUSP00000085523	ENSMUSP00000086614	ENSMUSP00000090305
GO:0042274	ribosomal small subunit biogenesis	16	70	4.05e-17	ENSMUSP00000004554	ENSMUSP00000025511	ENSMUSP00000058432	ENSMUSP00000073880	ENSMUSP00000079180	ENSMUSP00000079628	ENSMUSP00000092502	ENSMUSP00000099757	ENSMUSP00000099878	ENSMUSP00000102213	ENSMUSP00000103940	ENSMUSP00000104067	ENSMUSP00000110013	ENSMUSP00000110532	ENSMUSP00000125977	ENSMUSP00000132102	Rpl38	Rps10	Rps14	Rps16	Rps17	Rps19	Rps2	Rps21	Rps24	Rps25	Rps27	Rps28	Rps5	Rps6	Rps7	Rps8
GO:0044249	cellular biosynthetic process	71	3571	6.42e-17	ENSMUSP00000003521	ENSMUSP00000004072	ENSMUSP00000004554	ENSMUSP00000005017	ENSMUSP00000006496	ENSMUSP00000007012	ENSMUSP00000008812	ENSMUSP00000008826	ENSMUSP00000016072	ENSMUSP00000017548	ENSMUSP00000023210	ENSMUSP00000025511	ENSMUSP00000026420	ENSMUSP00000029722	ENSMUSP00000031617	ENSMUSP00000032998	ENSMUSP00000033157	ENSMUSP00000033699	ENSMUSP00000033776	ENSMUSP00000034588	ENSMUSP00000034966	ENSMUSP00000036696	ENSMUSP00000038352	ENSMUSP00000045841	ENSMUSP00000046506	ENSMUSP00000048153	ENSMUSP00000048469	ENSMUSP00000054490	ENSMUSP00000058432	ENSMUSP00000058919	ENSMUSP00000071616	ENSMUSP00000073175	ENSMUSP00000073880	ENSMUSP00000079163	ENSMUSP00000079340	ENSMUSP00000079628	ENSMUSP00000079944	ENSMUSP00000080354	ENSMUSP00000080523	ENSMUSP00000080854	ENSMUSP00000081474	ENSMUSP00000085523	ENSMUSP00000086614	ENSMUSP00000090305	ENSMUSP00000092502
GO:0042255	ribosome assembly	15	59	1.25e-16	ENSMUSP00000004554	ENSMUSP00000008826	ENSMUSP00000025511	ENSMUSP00000031617	ENSMUSP00000079180	ENSMUSP00000079628	ENSMUSP00000080354	ENSMUSP00000080854	ENSMUSP00000092502	ENSMUSP00000099595	ENSMUSP00000102213	ENSMUSP00000104067	ENSMUSP00000110013	ENSMUSP00000110532	ENSMUSP00000132102	Rpl10	Rpl11	Rpl3	Rpl38	Rpl5	Rpl6	Rps10	Rps14	Rps17	Rps19	Rps2	Rps25	Rps27	Rps28	Rps5
GO:0009987	cellular process	133	12459	8.12e-16	ENSMUSP00000000090	ENSMUSP00000003521	ENSMUSP00000003912	ENSMUSP00000003947	ENSMUSP00000004072	ENSMUSP00000004140	ENSMUSP00000004554	ENSMUSP00000005017	ENSMUSP00000005647	ENSMUSP00000006496	ENSMUSP00000007012	ENSMUSP00000008812	ENSMUSP00000008826	ENSMUSP00000013737	ENSMUSP00000014457	ENSMUSP00000016072	ENSMUSP00000017365	ENSMUSP00000017548	ENSMUSP00000017572	ENSMUSP00000019638	ENSMUSP00000021049	ENSMUSP00000021063	ENSMUSP00000021595	ENSMUSP00000022256	ENSMUSP00000022286	ENSMUSP00000022380	ENSMUSP00000022980	ENSMUSP00000023210	ENSMUSP00000023502	ENSMUSP00000025511	ENSMUSP00000026222	ENSMUSP00000026292	ENSMUSP00000026420	ENSMUSP00000026560	ENSMUSP00000027050	ENSMUSP00000027111	ENSMUSP00000027432	ENSMUSP00000027478	ENSMUSP00000028062	ENSMUSP00000028278	ENSMUSP00000028681	ENSMUSP00000028683	ENSMUSP00000029382	ENSMUSP00000029699	ENSMUSP00000029722
GO:1901576	organic substance biosynthetic process	70	3651	8.54e-16	ENSMUSP00000003521	ENSMUSP00000004072	ENSMUSP00000004554	ENSMUSP00000005017	ENSMUSP00000006496	ENSMUSP00000008812	ENSMUSP00000008826	ENSMUSP00000016072	ENSMUSP00000017548	ENSMUSP00000023210	ENSMUSP00000025511	ENSMUSP00000026420	ENSMUSP00000029722	ENSMUSP00000031617	ENSMUSP00000032998	ENSMUSP00000033157	ENSMUSP00000033699	ENSMUSP00000033776	ENSMUSP00000034588	ENSMUSP00000034966	ENSMUSP00000036696	ENSMUSP00000038352	ENSMUSP00000045841	ENSMUSP00000046506	ENSMUSP00000048153	ENSMUSP00000048469	ENSMUSP00000054490	ENSMUSP00000058432	ENSMUSP00000058919	ENSMUSP00000071616	ENSMUSP00000073175	ENSMUSP00000073880	ENSMUSP00000079163	ENSMUSP00000079340	ENSMUSP00000079628	ENSMUSP00000079944	ENSMUSP00000080354	ENSMUSP00000080523	ENSMUSP00000080854	ENSMUSP00000081474	ENSMUSP00000085523	ENSMUSP00000086614	ENSMUSP00000090305	ENSMUSP00000092502	ENSMUSP00000095287
GO:0034622	cellular protein-containing complex assembly	32	687	8.62e-16	ENSMUSP00000003912	ENSMUSP00000004554	ENSMUSP00000008826	ENSMUSP00000017572	ENSMUSP00000022286	ENSMUSP00000022980	ENSMUSP00000025511	ENSMUSP00000026222	ENSMUSP00000026560	ENSMUSP00000027478	ENSMUSP00000031617	ENSMUSP00000033157	ENSMUSP00000043543	ENSMUSP00000048153	ENSMUSP00000051657	ENSMUSP00000054490	ENSMUSP00000065352	ENSMUSP00000074600	ENSMUSP00000079180	ENSMUSP00000079628	ENSMUSP00000080354	ENSMUSP00000080854	ENSMUSP00000085523	ENSMUSP00000092502	ENSMUSP00000099595	ENSMUSP00000101003	ENSMUSP00000102213	ENSMUSP00000104067	ENSMUSP00000105796	ENSMUSP00000110013	ENSMUSP00000110532	ENSMUSP00000132102	Calr	Ndufa10	Ndufa13	Ndufa8	Ndufa9	Ndufab1	Ndufb10	Ndufb8	Ndufb9	Ndufs4	Ndufs7	Ndufs8	Psmd11
GO:0034660	ncRNA metabolic process	26	411	1.29e-15	ENSMUSP00000025511	ENSMUSP00000033776	ENSMUSP00000037613	ENSMUSP00000038580	ENSMUSP00000045841	ENSMUSP00000048469	ENSMUSP00000058432	ENSMUSP00000071616	ENSMUSP00000073175	ENSMUSP00000073880	ENSMUSP00000079628	ENSMUSP00000080854	ENSMUSP00000090305	ENSMUSP00000095287	ENSMUSP00000099595	ENSMUSP00000099757	ENSMUSP00000099878	ENSMUSP00000103940	ENSMUSP00000104067	ENSMUSP00000110013	ENSMUSP00000110731	ENSMUSP00000125977	ENSMUSP00000131489	ENSMUSP00000132082	ENSMUSP00000132102	ENSMUSP00000140250	Dkc1	Eprs	Fbl	Iars	Nop58	Rpl10a	Rpl11	Rpl14	Rpl26	Rpl27	Rpl27-ps3	Rpl35a	Rpl5	Rpl7	Rps14	Rps16	Rps17	Rps19	Rps21
GO:0000028	ribosomal small subunit assembly	10	19	1.55e-13	ENSMUSP00000004554	ENSMUSP00000025511	ENSMUSP00000079180	ENSMUSP00000079628	ENSMUSP00000092502	ENSMUSP00000102213	ENSMUSP00000104067	ENSMUSP00000110013	ENSMUSP00000110532	ENSMUSP00000132102	Rpl38	Rps10	Rps14	Rps17	Rps19	Rps2	Rps25	Rps27	Rps28	Rps5
GO:0022900	electron transport chain	15	120	1.21e-12	ENSMUSP00000000090	ENSMUSP00000007012	ENSMUSP00000013737	ENSMUSP00000014457	ENSMUSP00000022286	ENSMUSP00000022980	ENSMUSP00000023210	ENSMUSP00000026222	ENSMUSP00000027111	ENSMUSP00000027478	ENSMUSP00000042967	ENSMUSP00000065352	ENSMUSP00000079944	ENSMUSP00000121557	ENSMUSP00000136313	Cox5a	Cox5b	Cox6c	Cyc1	Ndufa10	Ndufa12	Ndufa8	Ndufb8	Ndufb9	Ndufs1	Ndufs2	Ndufs4	Ndufv1	Ndufv2	Sod2
GO:0042773	ATP synthesis coupled electron transport	12	56	1.71e-12	ENSMUSP00000000090	ENSMUSP00000013737	ENSMUSP00000022980	ENSMUSP00000023210	ENSMUSP00000026222	ENSMUSP00000027111	ENSMUSP00000027478	ENSMUSP00000042967	ENSMUSP00000065352	ENSMUSP00000079944	ENSMUSP00000121557	ENSMUSP00000136313	Cox5a	Cox5b	Cyc1	Ndufa10	Ndufa12	Ndufa8	Ndufb8	Ndufb9	Ndufs1	Ndufs2	Ndufv1	Ndufv2
GO:0022904	respiratory electron transport chain	13	78	2.41e-12	ENSMUSP00000000090	ENSMUSP00000007012	ENSMUSP00000013737	ENSMUSP00000022980	ENSMUSP00000023210	ENSMUSP00000026222	ENSMUSP00000027111	ENSMUSP00000027478	ENSMUSP00000042967	ENSMUSP00000065352	ENSMUSP00000079944	ENSMUSP00000121557	ENSMUSP00000136313	Cox5a	Cox5b	Cyc1	Ndufa10	Ndufa12	Ndufa8	Ndufb8	Ndufb9	Ndufs1	Ndufs2	Ndufv1	Ndufv2	Sod2
GO:0032981	mitochondrial respiratory chain complex I assembly	11	41	2.41e-12	ENSMUSP00000022286	ENSMUSP00000022980	ENSMUSP00000026222	ENSMUSP00000027478	ENSMUSP00000033157	ENSMUSP00000043543	ENSMUSP00000065352	ENSMUSP00000074600	ENSMUSP00000085523	ENSMUSP00000101003	ENSMUSP00000105796	Ndufa10	Ndufa13	Ndufa8	Ndufa9	Ndufab1	Ndufb10	Ndufb8	Ndufb9	Ndufs4	Ndufs7	Ndufs8
GO:0022618	ribonucleoprotein complex assembly	17	192	3.41e-12	ENSMUSP00000004554	ENSMUSP00000008826	ENSMUSP00000025511	ENSMUSP00000031617	ENSMUSP00000048153	ENSMUSP00000054490	ENSMUSP00000079180	ENSMUSP00000079628	ENSMUSP00000080354	ENSMUSP00000080854	ENSMUSP00000092502	ENSMUSP00000099595	ENSMUSP00000102213	ENSMUSP00000104067	ENSMUSP00000110013	ENSMUSP00000110532	ENSMUSP00000132102	Rbmxl1	Rpl10	Rpl11	Rpl3	Rpl38	Rpl5	Rpl6	Rps10	Rps14	Rps17	Rps19	Rps2	Rps23	Rps25	Rps27	Rps28	Rps5
GO:0045333	cellular respiration	15	140	8.07e-12	ENSMUSP00000000090	ENSMUSP00000005647	ENSMUSP00000007012	ENSMUSP00000013737	ENSMUSP00000022286	ENSMUSP00000022980	ENSMUSP00000023210	ENSMUSP00000026222	ENSMUSP00000027111	ENSMUSP00000027478	ENSMUSP00000042967	ENSMUSP00000065352	ENSMUSP00000079944	ENSMUSP00000121557	ENSMUSP00000136313	Cox5a	Cox5b	Cyc1	Ndufa10	Ndufa12	Ndufa8	Ndufb8	Ndufb9	Ndufs1	Ndufs2	Ndufs3	Ndufs4	Ndufv1	Ndufv2	Sod2
GO:0042775	mitochondrial ATP synthesis coupled electron transport	11	51	1.63e-11	ENSMUSP00000000090	ENSMUSP00000013737	ENSMUSP00000022980	ENSMUSP00000023210	ENSMUSP00000026222	ENSMUSP00000027478	ENSMUSP00000042967	ENSMUSP00000065352	ENSMUSP00000079944	ENSMUSP00000121557	ENSMUSP00000136313	Cox5a	Cox5b	Cyc1	Ndufa10	Ndufa12	Ndufa8	Ndufb8	Ndufb9	Ndufs2	Ndufv1	Ndufv2
GO:0065003	protein-containing complex assembly	35	1292	1.04e-10	ENSMUSP00000003912	ENSMUSP00000004554	ENSMUSP00000007012	ENSMUSP00000008826	ENSMUSP00000017572	ENSMUSP00000022286	ENSMUSP00000022980	ENSMUSP00000025511	ENSMUSP00000026222	ENSMUSP00000026560	ENSMUSP00000027478	ENSMUSP00000029382	ENSMUSP00000031617	ENSMUSP00000033157	ENSMUSP00000034588	ENSMUSP00000043543	ENSMUSP00000048153	ENSMUSP00000051657	ENSMUSP00000054490	ENSMUSP00000065352	ENSMUSP00000074600	ENSMUSP00000079180	ENSMUSP00000079628	ENSMUSP00000080354	ENSMUSP00000080854	ENSMUSP00000085523	ENSMUSP00000092502	ENSMUSP00000099595	ENSMUSP00000101003	ENSMUSP00000102213	ENSMUSP00000104067	ENSMUSP00000105796	ENSMUSP00000110013	ENSMUSP00000110532	ENSMUSP00000132102	Apoa1	Calr	Ndufa10	Ndufa13	Ndufa8	Ndufa9	Ndufab1	Ndufb10	Ndufb8	Ndufb9
GO:0043933	protein-containing complex subunit organization	37	1453	1.24e-10	ENSMUSP00000003912	ENSMUSP00000004554	ENSMUSP00000007012	ENSMUSP00000008826	ENSMUSP00000017572	ENSMUSP00000022286	ENSMUSP00000022980	ENSMUSP00000025511	ENSMUSP00000026222	ENSMUSP00000026560	ENSMUSP00000027478	ENSMUSP00000029382	ENSMUSP00000031617	ENSMUSP00000033157	ENSMUSP00000034588	ENSMUSP00000043543	ENSMUSP00000048153	ENSMUSP00000051657	ENSMUSP00000054490	ENSMUSP00000065352	ENSMUSP00000074600	ENSMUSP00000079180	ENSMUSP00000079628	ENSMUSP00000080354	ENSMUSP00000080854	ENSMUSP00000085523	ENSMUSP00000092502	ENSMUSP00000099435	ENSMUSP00000099595	ENSMUSP00000101003	ENSMUSP00000102213	ENSMUSP00000104067	ENSMUSP00000105796	ENSMUSP00000110013	ENSMUSP00000110532	ENSMUSP00000112259	ENSMUSP00000132102	Apoa1	Calr	Cfl1	Ndufa10	Ndufa13	Ndufa8	Ndufa9	Ndufab1
GO:0006396	RNA processing	26	715	2.19e-10	ENSMUSP00000025511	ENSMUSP00000033776	ENSMUSP00000037613	ENSMUSP00000038580	ENSMUSP00000048153	ENSMUSP00000048469	ENSMUSP00000058432	ENSMUSP00000071616	ENSMUSP00000073175	ENSMUSP00000073880	ENSMUSP00000076989	ENSMUSP00000079628	ENSMUSP00000080854	ENSMUSP00000090305	ENSMUSP00000095287	ENSMUSP00000099595	ENSMUSP00000099757	ENSMUSP00000099878	ENSMUSP00000103940	ENSMUSP00000104067	ENSMUSP00000110013	ENSMUSP00000110731	ENSMUSP00000125977	ENSMUSP00000131489	ENSMUSP00000132102	ENSMUSP00000140250	Dkc1	Fbl	Hnrnph1	Nop58	Rbmxl1	Rpl10a	Rpl11	Rpl14	Rpl26	Rpl27	Rpl27-ps3	Rpl35a	Rpl5	Rpl7	Rps14	Rps16	Rps17	Rps19	Rps21
GO:0042273	ribosomal large subunit biogenesis	11	68	2.42e-10	ENSMUSP00000008826	ENSMUSP00000031617	ENSMUSP00000048469	ENSMUSP00000071616	ENSMUSP00000073175	ENSMUSP00000080354	ENSMUSP00000080854	ENSMUSP00000099595	ENSMUSP00000102213	ENSMUSP00000110731	ENSMUSP00000131489	Rpl10	Rpl10a	Rpl11	Rpl14	Rpl26	Rpl3	Rpl35a	Rpl38	Rpl5	Rpl6	Rpl7
GO:0055114	oxidation-reduction process	28	898	9.32e-10	ENSMUSP00000000090	ENSMUSP00000003947	ENSMUSP00000005647	ENSMUSP00000007012	ENSMUSP00000013737	ENSMUSP00000014457	ENSMUSP00000022286	ENSMUSP00000022980	ENSMUSP00000023085	ENSMUSP00000023210	ENSMUSP00000026222	ENSMUSP00000027111	ENSMUSP00000027478	ENSMUSP00000028683	ENSMUSP00000033157	ENSMUSP00000033176	ENSMUSP00000034588	ENSMUSP00000042967	ENSMUSP00000043543	ENSMUSP00000065352	ENSMUSP00000074600	ENSMUSP00000079944	ENSMUSP00000085523	ENSMUSP00000101003	ENSMUSP00000105796	ENSMUSP00000114304	ENSMUSP00000121557	ENSMUSP00000136313	Aldh1l1	Apoa1	Cox5a	Cox5b	Cox6c	Cyc1	Ndufa10	Ndufa12	Ndufa13	Ndufa6	Ndufa8	Ndufa9	Ndufab1	Ndufb10	Ndufb8	Ndufb9	Ndufs1
GO:0071840	cellular component organization or biogenesis	69	4730	9.59e-10	ENSMUSP00000003912	ENSMUSP00000004554	ENSMUSP00000007012	ENSMUSP00000008812	ENSMUSP00000008826	ENSMUSP00000017572	ENSMUSP00000022286	ENSMUSP00000022980	ENSMUSP00000023502	ENSMUSP00000025511	ENSMUSP00000026222	ENSMUSP00000026292	ENSMUSP00000026560	ENSMUSP00000027050	ENSMUSP00000027111	ENSMUSP00000027478	ENSMUSP00000028062	ENSMUSP00000029382	ENSMUSP00000029699	ENSMUSP00000031617	ENSMUSP00000032998	ENSMUSP00000033157	ENSMUSP00000033176	ENSMUSP00000033699	ENSMUSP00000033776	ENSMUSP00000034588	ENSMUSP00000034966	ENSMUSP00000037613	ENSMUSP00000038580	ENSMUSP00000043543	ENSMUSP00000048153	ENSMUSP00000048469	ENSMUSP00000051657	ENSMUSP00000054490	ENSMUSP00000058432	ENSMUSP00000065352	ENSMUSP00000071616	ENSMUSP00000073175	ENSMUSP00000073880	ENSMUSP00000074600	ENSMUSP00000079180	ENSMUSP00000079628	ENSMUSP00000080354	ENSMUSP00000080854	ENSMUSP00000085523
GO:0006091	generation of precursor metabolites and energy	16	295	1.48e-08	ENSMUSP00000000090	ENSMUSP00000005647	ENSMUSP00000007012	ENSMUSP00000013737	ENSMUSP00000014457	ENSMUSP00000022286	ENSMUSP00000022980	ENSMUSP00000023210	ENSMUSP00000026222	ENSMUSP00000027111	ENSMUSP00000027478	ENSMUSP00000042967	ENSMUSP00000065352	ENSMUSP00000079944	ENSMUSP00000121557	ENSMUSP00000136313	Cox5a	Cox5b	Cox6c	Cyc1	Ndufa10	Ndufa12	Ndufa8	Ndufb8	Ndufb9	Ndufs1	Ndufs2	Ndufs3	Ndufs4	Ndufv1	Ndufv2	Sod2
GO:0046034	ATP metabolic process	12	162	9.52e-08	ENSMUSP00000000090	ENSMUSP00000013737	ENSMUSP00000022980	ENSMUSP00000023210	ENSMUSP00000026222	ENSMUSP00000027111	ENSMUSP00000027478	ENSMUSP00000042967	ENSMUSP00000065352	ENSMUSP00000079944	ENSMUSP00000121557	ENSMUSP00000136313	Cox5a	Cox5b	Cyc1	Ndufa10	Ndufa12	Ndufa8	Ndufb8	Ndufb9	Ndufs1	Ndufs2	Ndufv1	Ndufv2
GO:0009167	purine ribonucleoside monophosphate metabolic process	12	196	6.64e-07	ENSMUSP00000000090	ENSMUSP00000013737	ENSMUSP00000022980	ENSMUSP00000023210	ENSMUSP00000026222	ENSMUSP00000027111	ENSMUSP00000027478	ENSMUSP00000042967	ENSMUSP00000065352	ENSMUSP00000079944	ENSMUSP00000121557	ENSMUSP00000136313	Cox5a	Cox5b	Cyc1	Ndufa10	Ndufa12	Ndufa8	Ndufb8	Ndufb9	Ndufs1	Ndufs2	Ndufv1	Ndufv2
GO:0022607	cellular component assembly	37	2015	7.57e-07	ENSMUSP00000003912	ENSMUSP00000004554	ENSMUSP00000007012	ENSMUSP00000008826	ENSMUSP00000017572	ENSMUSP00000022286	ENSMUSP00000022980	ENSMUSP00000025511	ENSMUSP00000026222	ENSMUSP00000026560	ENSMUSP00000027478	ENSMUSP00000029382	ENSMUSP00000031617	ENSMUSP00000032998	ENSMUSP00000033157	ENSMUSP00000033699	ENSMUSP00000034588	ENSMUSP00000043543	ENSMUSP00000048153	ENSMUSP00000051657	ENSMUSP00000054490	ENSMUSP00000065352	ENSMUSP00000074600	ENSMUSP00000079180	ENSMUSP00000079628	ENSMUSP00000080354	ENSMUSP00000080854	ENSMUSP00000085523	ENSMUSP00000092502	ENSMUSP00000099595	ENSMUSP00000101003	ENSMUSP00000102213	ENSMUSP00000104067	ENSMUSP00000105796	ENSMUSP00000110013	ENSMUSP00000110532	ENSMUSP00000132102	Apoa1	Calr	Flna	Ndufa10	Ndufa13	Ndufa8	Ndufa9	Ndufab1
GO:0042176	regulation of protein catabolic process	15	360	1.35e-06	ENSMUSP00000017365	ENSMUSP00000021049	ENSMUSP00000021595	ENSMUSP00000022380	ENSMUSP00000027432	ENSMUSP00000028278	ENSMUSP00000030769	ENSMUSP00000032824	ENSMUSP00000033699	ENSMUSP00000073880	ENSMUSP00000080854	ENSMUSP00000099435	ENSMUSP00000099595	ENSMUSP00000099933	ENSMUSP00000105796	Flna	Ndufa13	Psmc1	Psmc2	Psmc4	Psmc5	Psmc6	Psmd1	Psmd14	Psmd3	Rpl11	Rpl23	Rpl5	Rps7	Xpo1
GO:0006120	mitochondrial electron transport	NADH to ubiquinone	5	13	3.38e-06	ENSMUSP00000022980	ENSMUSP00000026222	ENSMUSP00000027478	ENSMUSP00000065352	ENSMUSP00000121557	Ndufa10	Ndufa8	Ndufb8	Ndufb9	Ndufv2
GO:0070925	organelle assembly	18	576	3.65e-06	ENSMUSP00000004554	ENSMUSP00000008826	ENSMUSP00000025511	ENSMUSP00000031617	ENSMUSP00000032998	ENSMUSP00000033699	ENSMUSP00000054490	ENSMUSP00000079180	ENSMUSP00000079628	ENSMUSP00000080354	ENSMUSP00000080854	ENSMUSP00000092502	ENSMUSP00000099595	ENSMUSP00000102213	ENSMUSP00000104067	ENSMUSP00000110013	ENSMUSP00000110532	ENSMUSP00000132102	Flna	Rpl10	Rpl11	Rpl3	Rpl38	Rpl5	Rpl6	Rps10	Rps14	Rps17	Rps19	Rps2	Rps23	Rps25	Rps27	Rps28	Rps3	Rps5
GO:0000027	ribosomal large subunit assembly	6	29	3.71e-06	ENSMUSP00000008826	ENSMUSP00000031617	ENSMUSP00000080354	ENSMUSP00000080854	ENSMUSP00000099595	ENSMUSP00000102213	Rpl10	Rpl11	Rpl3	Rpl38	Rpl5	Rpl6
GO:0030490	maturation of SSU-rRNA	7	51	3.88e-06	ENSMUSP00000025511	ENSMUSP00000058432	ENSMUSP00000099757	ENSMUSP00000103940	ENSMUSP00000104067	ENSMUSP00000110013	ENSMUSP00000125977	Rps14	Rps16	Rps19	Rps21	Rps24	Rps28	Rps8
GO:0045899	positive regulation of RNA polymerase II transcriptional preinitiation complex assembly	5	14	4.31e-06	ENSMUSP00000021049	ENSMUSP00000021595	ENSMUSP00000022380	ENSMUSP00000030769	ENSMUSP00000032824	Psmc1	Psmc2	Psmc4	Psmc5	Psmc6
GO:0006996	organelle organization	43	2805	5.97e-06	ENSMUSP00000003912	ENSMUSP00000004554	ENSMUSP00000007012	ENSMUSP00000008826	ENSMUSP00000022286	ENSMUSP00000022980	ENSMUSP00000023502	ENSMUSP00000025511	ENSMUSP00000026222	ENSMUSP00000026292	ENSMUSP00000026560	ENSMUSP00000027111	ENSMUSP00000027478	ENSMUSP00000028062	ENSMUSP00000029382	ENSMUSP00000029699	ENSMUSP00000031617	ENSMUSP00000032998	ENSMUSP00000033157	ENSMUSP00000033176	ENSMUSP00000033699	ENSMUSP00000033776	ENSMUSP00000037613	ENSMUSP00000043543	ENSMUSP00000054490	ENSMUSP00000065352	ENSMUSP00000074600	ENSMUSP00000079180	ENSMUSP00000079628	ENSMUSP00000080354	ENSMUSP00000080854	ENSMUSP00000085523	ENSMUSP00000085986	ENSMUSP00000092502	ENSMUSP00000099595	ENSMUSP00000101003	ENSMUSP00000102213	ENSMUSP00000104067	ENSMUSP00000105796	ENSMUSP00000110013	ENSMUSP00000110532	ENSMUSP00000112259	ENSMUSP00000132102	Arfgef1	Calr
GO:0000462	maturation of SSU-rRNA from tricistronic rRNA transcript (SSU-rRNA	5.8S rRNA	LSU-rRNA)	6	33	6.9e-06	ENSMUSP00000025511	ENSMUSP00000058432	ENSMUSP00000099757	ENSMUSP00000103940	ENSMUSP00000104067	ENSMUSP00000125977	Rps14	Rps16	Rps19	Rps21	Rps24	Rps8
GO:0006508	proteolysis	23	1024	1.69e-05	ENSMUSP00000017365	ENSMUSP00000017572	ENSMUSP00000019638	ENSMUSP00000021049	ENSMUSP00000021063	ENSMUSP00000021595	ENSMUSP00000022256	ENSMUSP00000022380	ENSMUSP00000025851	ENSMUSP00000026560	ENSMUSP00000027050	ENSMUSP00000027432	ENSMUSP00000028278	ENSMUSP00000028681	ENSMUSP00000028683	ENSMUSP00000030769	ENSMUSP00000032824	ENSMUSP00000033176	ENSMUSP00000034960	ENSMUSP00000041968	ENSMUSP00000048153	ENSMUSP00000048416	ENSMUSP00000051657	Cops4	Cops5	Cops6	Dpp3	Dpp8	F2	Pdia3	Psmc1	Psmc2	Psmc4	Psmc5	Psmc6	Psmd1	Psmd11	Psmd12	Psmd13	Psmd14	Psmd3	Psmd6	Psmd7	Psmd8	Rbmxl1
GO:0007005	mitochondrion organization	14	388	1.78e-05	ENSMUSP00000007012	ENSMUSP00000022286	ENSMUSP00000022980	ENSMUSP00000026222	ENSMUSP00000027111	ENSMUSP00000027478	ENSMUSP00000033157	ENSMUSP00000033176	ENSMUSP00000043543	ENSMUSP00000065352	ENSMUSP00000074600	ENSMUSP00000085523	ENSMUSP00000101003	ENSMUSP00000105796	Ndufa10	Ndufa13	Ndufa8	Ndufa9	Ndufab1	Ndufb10	Ndufb8	Ndufb9	Ndufs1	Ndufs4	Ndufs7	Ndufs8	Sod2	Uqcrc2
GO:0009894	regulation of catabolic process	19	745	2.83e-05	ENSMUSP00000017365	ENSMUSP00000021049	ENSMUSP00000021595	ENSMUSP00000022380	ENSMUSP00000027432	ENSMUSP00000028062	ENSMUSP00000028278	ENSMUSP00000030769	ENSMUSP00000032824	ENSMUSP00000033699	ENSMUSP00000033776	ENSMUSP00000034588	ENSMUSP00000073880	ENSMUSP00000080854	ENSMUSP00000099435	ENSMUSP00000099595	ENSMUSP00000099933	ENSMUSP00000105796	ENSMUSP00000114705	Apoa1	Dbi	Dkc1	Flna	Ndufa13	Psmc1	Psmc2	Psmc4	Psmc5	Psmc6	Psmd1	Psmd14	Psmd3	Rpl11	Rpl23	Rpl5	Rps7	Vim	Xpo1
GO:1904667	negative regulation of ubiquitin protein ligase activity	4	10	5.2e-05	ENSMUSP00000073880	ENSMUSP00000080854	ENSMUSP00000099435	ENSMUSP00000099595	Rpl11	Rpl23	Rpl5	Rps7
GO:1903050	regulation of proteolysis involved in cellular protein catabolic process	10	208	6.47e-05	ENSMUSP00000021049	ENSMUSP00000021595	ENSMUSP00000022380	ENSMUSP00000028278	ENSMUSP00000030769	ENSMUSP00000032824	ENSMUSP00000073880	ENSMUSP00000080854	ENSMUSP00000099435	ENSMUSP00000099595	Psmc1	Psmc2	Psmc4	Psmc5	Psmc6	Psmd14	Rpl11	Rpl23	Rpl5	Rps7
GO:0006511	ubiquitin-dependent protein catabolic process	13	397	0.00012	ENSMUSP00000017365	ENSMUSP00000017572	ENSMUSP00000021049	ENSMUSP00000021063	ENSMUSP00000021595	ENSMUSP00000022256	ENSMUSP00000022380	ENSMUSP00000026560	ENSMUSP00000027432	ENSMUSP00000030769	ENSMUSP00000032824	ENSMUSP00000041968	ENSMUSP00000051657	Psmc1	Psmc2	Psmc4	Psmc5	Psmc6	Psmd1	Psmd11	Psmd12	Psmd13	Psmd3	Psmd6	Psmd7	Psmd8
GO:0043161	proteasome-mediated ubiquitin-dependent protein catabolic process	10	230	0.00014	ENSMUSP00000021049	ENSMUSP00000021063	ENSMUSP00000021595	ENSMUSP00000022256	ENSMUSP00000022380	ENSMUSP00000027432	ENSMUSP00000030769	ENSMUSP00000032824	ENSMUSP00000041968	ENSMUSP00000051657	Psmc1	Psmc2	Psmc4	Psmc5	Psmc6	Psmd1	Psmd12	Psmd6	Psmd7	Psmd8
GO:0006417	regulation of translation	11	307	0.00026	ENSMUSP00000003912	ENSMUSP00000006496	ENSMUSP00000008826	ENSMUSP00000025511	ENSMUSP00000028062	ENSMUSP00000029722	ENSMUSP00000032998	ENSMUSP00000045841	ENSMUSP00000073175	ENSMUSP00000080854	ENSMUSP00000102213	Calr	Eprs	Rpl10	Rpl26	Rpl38	Rpl5	Rps14	Rps3	Rps3a1	Rps9	Vim
GO:0051246	regulation of protein metabolic process	37	2612	0.00027	ENSMUSP00000003912	ENSMUSP00000006496	ENSMUSP00000008826	ENSMUSP00000017365	ENSMUSP00000021049	ENSMUSP00000021595	ENSMUSP00000022286	ENSMUSP00000022380	ENSMUSP00000025511	ENSMUSP00000027050	ENSMUSP00000027432	ENSMUSP00000028062	ENSMUSP00000028278	ENSMUSP00000028681	ENSMUSP00000029722	ENSMUSP00000030769	ENSMUSP00000032203	ENSMUSP00000032824	ENSMUSP00000032998	ENSMUSP00000033699	ENSMUSP00000034588	ENSMUSP00000045841	ENSMUSP00000057543	ENSMUSP00000068971	ENSMUSP00000073175	ENSMUSP00000073880	ENSMUSP00000080854	ENSMUSP00000085986	ENSMUSP00000086640	ENSMUSP00000092502	ENSMUSP00000099435	ENSMUSP00000099595	ENSMUSP00000099933	ENSMUSP00000102213	ENSMUSP00000105796	ENSMUSP00000112259	ENSMUSP00000127005	A2m	Apoa1	Arfgef1	Calr	Cfl1	Cops5	Eprs	F2
GO:0010608	posttranscriptional regulation of gene expression	12	392	0.00045	ENSMUSP00000003912	ENSMUSP00000006496	ENSMUSP00000008826	ENSMUSP00000025511	ENSMUSP00000028062	ENSMUSP00000029722	ENSMUSP00000032998	ENSMUSP00000033776	ENSMUSP00000045841	ENSMUSP00000073175	ENSMUSP00000080854	ENSMUSP00000102213	Calr	Dkc1	Eprs	Rpl10	Rpl26	Rpl38	Rpl5	Rps14	Rps3	Rps3a1	Rps9	Vim
GO:0006139	nucleobase-containing compound metabolic process	46	3702	0.00047	ENSMUSP00000000090	ENSMUSP00000005017	ENSMUSP00000013737	ENSMUSP00000022980	ENSMUSP00000023210	ENSMUSP00000025511	ENSMUSP00000026222	ENSMUSP00000026292	ENSMUSP00000027111	ENSMUSP00000027478	ENSMUSP00000028278	ENSMUSP00000032998	ENSMUSP00000033699	ENSMUSP00000033776	ENSMUSP00000036696	ENSMUSP00000037613	ENSMUSP00000038580	ENSMUSP00000042967	ENSMUSP00000045841	ENSMUSP00000048153	ENSMUSP00000048469	ENSMUSP00000058432	ENSMUSP00000065352	ENSMUSP00000071616	ENSMUSP00000073175	ENSMUSP00000073880	ENSMUSP00000076989	ENSMUSP00000079628	ENSMUSP00000079944	ENSMUSP00000080854	ENSMUSP00000090305	ENSMUSP00000095287	ENSMUSP00000099595	ENSMUSP00000099757	ENSMUSP00000099878	ENSMUSP00000103940	ENSMUSP00000104067	ENSMUSP00000110013	ENSMUSP00000110731	ENSMUSP00000121557	ENSMUSP00000125977	ENSMUSP00000131489	ENSMUSP00000132082	ENSMUSP00000132102	ENSMUSP00000136313
GO:0046483	heterocycle metabolic process	47	3830	0.00051	ENSMUSP00000000090	ENSMUSP00000005017	ENSMUSP00000013737	ENSMUSP00000022980	ENSMUSP00000023210	ENSMUSP00000025511	ENSMUSP00000026222	ENSMUSP00000026292	ENSMUSP00000027111	ENSMUSP00000027478	ENSMUSP00000028278	ENSMUSP00000032998	ENSMUSP00000033699	ENSMUSP00000033776	ENSMUSP00000036696	ENSMUSP00000037613	ENSMUSP00000038580	ENSMUSP00000042967	ENSMUSP00000045841	ENSMUSP00000048153	ENSMUSP00000048469	ENSMUSP00000058432	ENSMUSP00000065352	ENSMUSP00000071616	ENSMUSP00000073175	ENSMUSP00000073880	ENSMUSP00000076989	ENSMUSP00000079628	ENSMUSP00000079944	ENSMUSP00000080854	ENSMUSP00000090305	ENSMUSP00000095287	ENSMUSP00000099595	ENSMUSP00000099757	ENSMUSP00000099878	ENSMUSP00000103940	ENSMUSP00000104067	ENSMUSP00000110013	ENSMUSP00000110731	ENSMUSP00000114304	ENSMUSP00000121557	ENSMUSP00000125977	ENSMUSP00000131489	ENSMUSP00000132082	ENSMUSP00000132102
GO:0006725	cellular aromatic compound metabolic process	47	3879	0.00068	ENSMUSP00000000090	ENSMUSP00000005017	ENSMUSP00000013737	ENSMUSP00000022980	ENSMUSP00000023210	ENSMUSP00000025511	ENSMUSP00000026222	ENSMUSP00000026292	ENSMUSP00000027111	ENSMUSP00000027478	ENSMUSP00000028278	ENSMUSP00000032998	ENSMUSP00000033699	ENSMUSP00000033776	ENSMUSP00000036696	ENSMUSP00000037613	ENSMUSP00000038580	ENSMUSP00000042967	ENSMUSP00000045841	ENSMUSP00000048153	ENSMUSP00000048469	ENSMUSP00000058432	ENSMUSP00000065352	ENSMUSP00000071616	ENSMUSP00000073175	ENSMUSP00000073880	ENSMUSP00000076989	ENSMUSP00000079628	ENSMUSP00000079944	ENSMUSP00000080854	ENSMUSP00000090305	ENSMUSP00000095287	ENSMUSP00000099595	ENSMUSP00000099757	ENSMUSP00000099878	ENSMUSP00000103940	ENSMUSP00000104067	ENSMUSP00000110013	ENSMUSP00000110731	ENSMUSP00000114304	ENSMUSP00000121557	ENSMUSP00000125977	ENSMUSP00000131489	ENSMUSP00000132082	ENSMUSP00000132102
GO:1901798	positive regulation of signal transduction by p53 class mediator	4	24	0.00075	ENSMUSP00000073175	ENSMUSP00000073880	ENSMUSP00000099435	ENSMUSP00000099595	Rpl11	Rpl23	Rpl26	Rps7
GO:0030162	regulation of proteolysis	16	716	0.00076	ENSMUSP00000021049	ENSMUSP00000021595	ENSMUSP00000022380	ENSMUSP00000028278	ENSMUSP00000028681	ENSMUSP00000030769	ENSMUSP00000032203	ENSMUSP00000032824	ENSMUSP00000032998	ENSMUSP00000068971	ENSMUSP00000073880	ENSMUSP00000080854	ENSMUSP00000099435	ENSMUSP00000099595	ENSMUSP00000105796	ENSMUSP00000112259	A2m	Cfl1	F2	Ndufa13	Psmc1	Psmc2	Psmc4	Psmc5	Psmc6	Psmd14	Rpl11	Rpl23	Rpl5	Rps3	Rps7	Serpinc1
GO:0051438	regulation of ubiquitin-protein transferase activity	5	51	0.00077	ENSMUSP00000073880	ENSMUSP00000080854	ENSMUSP00000092502	ENSMUSP00000099435	ENSMUSP00000099595	Rpl11	Rpl23	Rpl5	Rps2	Rps7
GO:0017144	drug metabolic process	13	494	0.00083	ENSMUSP00000000090	ENSMUSP00000007012	ENSMUSP00000013737	ENSMUSP00000022980	ENSMUSP00000023210	ENSMUSP00000026222	ENSMUSP00000027111	ENSMUSP00000027478	ENSMUSP00000042967	ENSMUSP00000065352	ENSMUSP00000079944	ENSMUSP00000121557	ENSMUSP00000136313	Cox5a	Cox5b	Cyc1	Ndufa10	Ndufa12	Ndufa8	Ndufb8	Ndufb9	Ndufs1	Ndufs2	Ndufv1	Ndufv2	Sod2
GO:1901360	organic cyclic compound metabolic process	48	4057	0.00094	ENSMUSP00000000090	ENSMUSP00000005017	ENSMUSP00000013737	ENSMUSP00000022980	ENSMUSP00000023210	ENSMUSP00000025511	ENSMUSP00000026222	ENSMUSP00000026292	ENSMUSP00000027111	ENSMUSP00000027478	ENSMUSP00000028278	ENSMUSP00000032998	ENSMUSP00000033699	ENSMUSP00000033776	ENSMUSP00000034588	ENSMUSP00000036696	ENSMUSP00000037613	ENSMUSP00000038580	ENSMUSP00000042967	ENSMUSP00000045841	ENSMUSP00000048153	ENSMUSP00000048469	ENSMUSP00000058432	ENSMUSP00000065352	ENSMUSP00000071616	ENSMUSP00000073175	ENSMUSP00000073880	ENSMUSP00000076989	ENSMUSP00000079628	ENSMUSP00000079944	ENSMUSP00000080854	ENSMUSP00000090305	ENSMUSP00000095287	ENSMUSP00000099595	ENSMUSP00000099757	ENSMUSP00000099878	ENSMUSP00000103940	ENSMUSP00000104067	ENSMUSP00000110013	ENSMUSP00000110731	ENSMUSP00000114304	ENSMUSP00000121557	ENSMUSP00000125977	ENSMUSP00000131489	ENSMUSP00000132082
GO:1902255	positive regulation of intrinsic apoptotic signaling pathway by p53 class mediator	3	8	0.00094	ENSMUSP00000073175	ENSMUSP00000073880	ENSMUSP00000099595	Rpl11	Rpl26	Rps7
GO:0072593	reactive oxygen species metabolic process	6	94	0.0012	ENSMUSP00000003947	ENSMUSP00000005647	ENSMUSP00000007012	ENSMUSP00000022286	ENSMUSP00000027111	ENSMUSP00000105796	Ndufa13	Ndufs1	Ndufs3	Ndufs4	Nqo1	Sod2
GO:0000338	protein deneddylation	3	10	0.0016	ENSMUSP00000019638	ENSMUSP00000027050	ENSMUSP00000048416	Cops4	Cops5	Cops6
GO:0032268	regulation of cellular protein metabolic process	33	2443	0.0018	ENSMUSP00000003912	ENSMUSP00000006496	ENSMUSP00000008826	ENSMUSP00000021049	ENSMUSP00000021595	ENSMUSP00000022286	ENSMUSP00000022380	ENSMUSP00000025511	ENSMUSP00000027050	ENSMUSP00000028062	ENSMUSP00000028278	ENSMUSP00000028681	ENSMUSP00000029722	ENSMUSP00000030769	ENSMUSP00000032203	ENSMUSP00000032824	ENSMUSP00000032998	ENSMUSP00000034588	ENSMUSP00000045841	ENSMUSP00000057543	ENSMUSP00000068971	ENSMUSP00000073175	ENSMUSP00000073880	ENSMUSP00000080854	ENSMUSP00000085986	ENSMUSP00000086640	ENSMUSP00000092502	ENSMUSP00000099435	ENSMUSP00000099595	ENSMUSP00000102213	ENSMUSP00000105796	ENSMUSP00000112259	ENSMUSP00000127005	A2m	Apoa1	Arfgef1	Calr	Cfl1	Cops5	Eprs	F2	Gnai2	Ndufa13	Ndufs4	Ppp2r2a
GO:0030433	ubiquitin-dependent ERAD pathway	5	64	0.002	ENSMUSP00000021049	ENSMUSP00000021595	ENSMUSP00000022380	ENSMUSP00000030769	ENSMUSP00000032824	Psmc1	Psmc2	Psmc4	Psmc5	Psmc6
GO:1901796	regulation of signal transduction by p53 class mediator	5	66	0.0022	ENSMUSP00000073175	ENSMUSP00000073880	ENSMUSP00000080854	ENSMUSP00000099435	ENSMUSP00000099595	Rpl11	Rpl23	Rpl26	Rpl5	Rps7
GO:0031397	negative regulation of protein ubiquitination	5	67	0.0024	ENSMUSP00000032998	ENSMUSP00000073880	ENSMUSP00000080854	ENSMUSP00000099435	ENSMUSP00000099595	Rpl11	Rpl23	Rpl5	Rps3	Rps7
GO:0050821	protein stabilization	7	157	0.0024	ENSMUSP00000003912	ENSMUSP00000033699	ENSMUSP00000034588	ENSMUSP00000073880	ENSMUSP00000080854	ENSMUSP00000099435	ENSMUSP00000099595	Apoa1	Calr	Flna	Rpl11	Rpl23	Rpl5	Rps7
GO:0031329	regulation of cellular catabolic process	14	641	0.0026	ENSMUSP00000021049	ENSMUSP00000021595	ENSMUSP00000022380	ENSMUSP00000028062	ENSMUSP00000028278	ENSMUSP00000030769	ENSMUSP00000032824	ENSMUSP00000033776	ENSMUSP00000034588	ENSMUSP00000073880	ENSMUSP00000080854	ENSMUSP00000099435	ENSMUSP00000099595	ENSMUSP00000114705	Apoa1	Dbi	Dkc1	Psmc1	Psmc2	Psmc4	Psmc5	Psmc6	Psmd14	Rpl11	Rpl23	Rpl5	Rps7	Vim
GO:2001242	regulation of intrinsic apoptotic signaling pathway	7	160	0.0026	ENSMUSP00000005647	ENSMUSP00000007012	ENSMUSP00000032998	ENSMUSP00000073175	ENSMUSP00000073880	ENSMUSP00000099595	ENSMUSP00000105796	Ndufa13	Ndufs3	Rpl11	Rpl26	Rps3	Rps7	Sod2
GO:0061844	antimicrobial humoral immune response mediated by antimicrobial peptide	4	36	0.0027	ENSMUSP00000028681	ENSMUSP00000104067	ENSMUSP00000106014	ENSMUSP00000110886	F2	Rpl30	Rpl39	Rps19
GO:0055086	nucleobase-containing small molecule metabolic process	13	566	0.0028	ENSMUSP00000000090	ENSMUSP00000013737	ENSMUSP00000022980	ENSMUSP00000023210	ENSMUSP00000026222	ENSMUSP00000027111	ENSMUSP00000027478	ENSMUSP00000036696	ENSMUSP00000042967	ENSMUSP00000065352	ENSMUSP00000079944	ENSMUSP00000121557	ENSMUSP00000136313	Cox5a	Cox5b	Cyc1	Gmds	Ndufa10	Ndufa12	Ndufa8	Ndufb8	Ndufb9	Ndufs1	Ndufs2	Ndufv1	Ndufv2
GO:0016043	cellular component organization	50	4560	0.0038	ENSMUSP00000003912	ENSMUSP00000004554	ENSMUSP00000007012	ENSMUSP00000008826	ENSMUSP00000017572	ENSMUSP00000022286	ENSMUSP00000022980	ENSMUSP00000023502	ENSMUSP00000025511	ENSMUSP00000026222	ENSMUSP00000026292	ENSMUSP00000026560	ENSMUSP00000027111	ENSMUSP00000027478	ENSMUSP00000028062	ENSMUSP00000029382	ENSMUSP00000029699	ENSMUSP00000031617	ENSMUSP00000032998	ENSMUSP00000033157	ENSMUSP00000033176	ENSMUSP00000033699	ENSMUSP00000033776	ENSMUSP00000034588	ENSMUSP00000034966	ENSMUSP00000037613	ENSMUSP00000043543	ENSMUSP00000048153	ENSMUSP00000051657	ENSMUSP00000054490	ENSMUSP00000065352	ENSMUSP00000074600	ENSMUSP00000079180	ENSMUSP00000079628	ENSMUSP00000080354	ENSMUSP00000080854	ENSMUSP00000085523	ENSMUSP00000085986	ENSMUSP00000092502	ENSMUSP00000099435	ENSMUSP00000099595	ENSMUSP00000101003	ENSMUSP00000102213	ENSMUSP00000104067	ENSMUSP00000105796
GO:0043248	proteasome assembly	3	16	0.0046	ENSMUSP00000017572	ENSMUSP00000026560	ENSMUSP00000051657	Psmd11	Psmd13	Psmd8
GO:0061136	regulation of proteasomal protein catabolic process	7	179	0.0047	ENSMUSP00000021049	ENSMUSP00000021595	ENSMUSP00000022380	ENSMUSP00000028278	ENSMUSP00000030769	ENSMUSP00000032824	ENSMUSP00000099595	Psmc1	Psmc2	Psmc4	Psmc5	Psmc6	Psmd14	Rpl11
GO:0019637	organophosphate metabolic process	15	775	0.0051	ENSMUSP00000000090	ENSMUSP00000013737	ENSMUSP00000022980	ENSMUSP00000023210	ENSMUSP00000026222	ENSMUSP00000027111	ENSMUSP00000027478	ENSMUSP00000033157	ENSMUSP00000034588	ENSMUSP00000042967	ENSMUSP00000065352	ENSMUSP00000079944	ENSMUSP00000114705	ENSMUSP00000121557	ENSMUSP00000136313	Apoa1	Cox5a	Cox5b	Cyc1	Dbi	Ndufa10	Ndufa12	Ndufa8	Ndufab1	Ndufb8	Ndufb9	Ndufs1	Ndufs2	Ndufv1	Ndufv2
GO:0006450	regulation of translational fidelity	3	17	0.0052	ENSMUSP00000004554	ENSMUSP00000006496	ENSMUSP00000132082	Iars	Rps5	Rps9
GO:2000059	negative regulation of ubiquitin-dependent protein catabolic process	4	46	0.0059	ENSMUSP00000073880	ENSMUSP00000080854	ENSMUSP00000099435	ENSMUSP00000099595	Rpl11	Rpl23	Rpl5	Rps7
GO:2001233	regulation of apoptotic signaling pathway	10	401	0.0081	ENSMUSP00000005647	ENSMUSP00000007012	ENSMUSP00000028683	ENSMUSP00000029699	ENSMUSP00000032998	ENSMUSP00000057543	ENSMUSP00000073175	ENSMUSP00000073880	ENSMUSP00000099595	ENSMUSP00000105796	Gnai2	Lmna	Ndufa13	Ndufs3	Pdia3	Rpl11	Rpl26	Rps3	Rps7	Sod2
GO:0045862	positive regulation of proteolysis	9	334	0.0089	ENSMUSP00000021049	ENSMUSP00000021595	ENSMUSP00000022380	ENSMUSP00000028278	ENSMUSP00000030769	ENSMUSP00000032824	ENSMUSP00000032998	ENSMUSP00000105796	ENSMUSP00000112259	Cfl1	Ndufa13	Psmc1	Psmc2	Psmc4	Psmc5	Psmc6	Psmd14	Rps3
GO:0034101	erythrocyte homeostasis	5	96	0.0098	ENSMUSP00000025511	ENSMUSP00000079628	ENSMUSP00000099878	ENSMUSP00000104067	ENSMUSP00000125977	Rps14	Rps17	Rps19	Rps24	Rps6
GO:0042776	mitochondrial ATP synthesis coupled proton transport	2	4	0.0104	ENSMUSP00000023210	ENSMUSP00000079944	Cox5b	Cyc1
GO:0048254	snoRNA localization	2	4	0.0104	ENSMUSP00000037613	ENSMUSP00000140250	Fbl	Nop58
GO:2000435	negative regulation of protein neddylation	2	4	0.0104	ENSMUSP00000080854	ENSMUSP00000099595	Rpl11	Rpl5
GO:0045727	positive regulation of translation	5	108	0.0156	ENSMUSP00000006496	ENSMUSP00000028062	ENSMUSP00000029722	ENSMUSP00000073175	ENSMUSP00000080854	Rpl26	Rpl5	Rps3a1	Rps9	Vim
GO:1901800	positive regulation of proteasomal protein catabolic process	5	109	0.0161	ENSMUSP00000021049	ENSMUSP00000021595	ENSMUSP00000022380	ENSMUSP00000030769	ENSMUSP00000032824	Psmc1	Psmc2	Psmc4	Psmc5	Psmc6
GO:0034504	protein localization to nucleus	6	166	0.0169	ENSMUSP00000003912	ENSMUSP00000005017	ENSMUSP00000029699	ENSMUSP00000099595	ENSMUSP00000099933	ENSMUSP00000112259	Calr	Cfl1	Hdgf	Lmna	Rpl11	Xpo1
GO:1901565	organonitrogen compound catabolic process	14	790	0.0169	ENSMUSP00000017365	ENSMUSP00000017572	ENSMUSP00000021049	ENSMUSP00000021063	ENSMUSP00000021595	ENSMUSP00000022256	ENSMUSP00000022380	ENSMUSP00000026560	ENSMUSP00000027432	ENSMUSP00000030769	ENSMUSP00000032824	ENSMUSP00000041968	ENSMUSP00000051657	ENSMUSP00000114304	Aldh1l1	Psmc1	Psmc2	Psmc4	Psmc5	Psmc6	Psmd1	Psmd11	Psmd12	Psmd13	Psmd3	Psmd6	Psmd7	Psmd8
GO:2001244	positive regulation of intrinsic apoptotic signaling pathway	4	64	0.0172	ENSMUSP00000032998	ENSMUSP00000073175	ENSMUSP00000073880	ENSMUSP00000099595	Rpl11	Rpl26	Rps3	Rps7
GO:0090261	positive regulation of inclusion body assembly	2	6	0.018	ENSMUSP00000021049	ENSMUSP00000022380	Psmc5	Psmc6
GO:0000154	rRNA modification	3	29	0.0188	ENSMUSP00000033776	ENSMUSP00000037613	ENSMUSP00000140250	Dkc1	Fbl	Nop58
GO:0043628	ncRNA 3'-end processing	3	29	0.0188	ENSMUSP00000033776	ENSMUSP00000037613	ENSMUSP00000058432	Dkc1	Fbl	Rps21
GO:0031640	killing of cells of other organism	3	30	0.0202	ENSMUSP00000028681	ENSMUSP00000104067	ENSMUSP00000106014	F2	Rpl30	Rps19
GO:0033119	negative regulation of RNA splicing	3	31	0.0216	ENSMUSP00000026420	ENSMUSP00000048153	ENSMUSP00000126294	Rbmxl1	Rps13	Rps26
GO:0042177	negative regulation of protein catabolic process	5	119	0.0216	ENSMUSP00000033699	ENSMUSP00000073880	ENSMUSP00000080854	ENSMUSP00000099435	ENSMUSP00000099595	Flna	Rpl11	Rpl23	Rpl5	Rps7
GO:0010941	regulation of cell death	22	1640	0.0246	ENSMUSP00000003947	ENSMUSP00000005647	ENSMUSP00000007012	ENSMUSP00000008826	ENSMUSP00000021595	ENSMUSP00000025645	ENSMUSP00000027050	ENSMUSP00000028683	ENSMUSP00000029382	ENSMUSP00000029699	ENSMUSP00000029722	ENSMUSP00000032998	ENSMUSP00000033699	ENSMUSP00000038352	ENSMUSP00000057543	ENSMUSP00000073175	ENSMUSP00000073880	ENSMUSP00000099595	ENSMUSP00000099878	ENSMUSP00000100026	ENSMUSP00000105796	ENSMUSP00000127005	Cntfr	Cops5	Flna	Gnai2	Lmna	Ndufa13	Ndufs3	Nqo1	Pdia3	Ppid	Psmc1	Rpl10	Rpl11	Rpl26	Rps29	Rps3	Rps3a1	Rps6	Rps7	Sod2	Tbc1d24	Tmem132a
GO:0071236	cellular response to antibiotic	5	124	0.0248	ENSMUSP00000003947	ENSMUSP00000007012	ENSMUSP00000032998	ENSMUSP00000099435	ENSMUSP00000112259	Cfl1	Nqo1	Rpl23	Rps3	Sod2
GO:0031396	regulation of protein ubiquitination	6	186	0.0264	ENSMUSP00000032998	ENSMUSP00000073880	ENSMUSP00000080854	ENSMUSP00000092502	ENSMUSP00000099435	ENSMUSP00000099595	Rpl11	Rpl23	Rpl5	Rps2	Rps3	Rps7
GO:1900026	positive regulation of substrate adhesion-dependent cell spreading	3	34	0.0264	ENSMUSP00000003912	ENSMUSP00000033699	ENSMUSP00000034588	Apoa1	Calr	Flna
GO:0031126	snoRNA 3'-end processing	2	9	0.0312	ENSMUSP00000033776	ENSMUSP00000037613	Dkc1	Fbl
GO:0034976	response to endoplasmic reticulum stress	6	196	0.0328	ENSMUSP00000021049	ENSMUSP00000021595	ENSMUSP00000022380	ENSMUSP00000028683	ENSMUSP00000030769	ENSMUSP00000032824	Pdia3	Psmc1	Psmc2	Psmc4	Psmc5	Psmc6
GO:0009895	negative regulation of catabolic process	7	269	0.0354	ENSMUSP00000033699	ENSMUSP00000033776	ENSMUSP00000073880	ENSMUSP00000080854	ENSMUSP00000099435	ENSMUSP00000099595	ENSMUSP00000114705	Dbi	Dkc1	Flna	Rpl11	Rpl23	Rpl5	Rps7
GO:0016070	RNA metabolic process	31	2725	0.036	ENSMUSP00000005017	ENSMUSP00000025511	ENSMUSP00000032998	ENSMUSP00000033699	ENSMUSP00000033776	ENSMUSP00000037613	ENSMUSP00000038580	ENSMUSP00000045841	ENSMUSP00000048153	ENSMUSP00000048469	ENSMUSP00000058432	ENSMUSP00000071616	ENSMUSP00000073175	ENSMUSP00000073880	ENSMUSP00000076989	ENSMUSP00000079628	ENSMUSP00000080854	ENSMUSP00000090305	ENSMUSP00000095287	ENSMUSP00000099595	ENSMUSP00000099757	ENSMUSP00000099878	ENSMUSP00000103940	ENSMUSP00000104067	ENSMUSP00000110013	ENSMUSP00000110731	ENSMUSP00000125977	ENSMUSP00000131489	ENSMUSP00000132082	ENSMUSP00000132102	ENSMUSP00000140250	Dkc1	Eprs	Fbl	Flna	Hdgf	Hnrnph1	Iars	Nop58	Rbmxl1	Rpl10a	Rpl11	Rpl14	Rpl26	Rpl27
GO:0043065	positive regulation of apoptotic process	11	601	0.0381	ENSMUSP00000003947	ENSMUSP00000007012	ENSMUSP00000028683	ENSMUSP00000029382	ENSMUSP00000032998	ENSMUSP00000038352	ENSMUSP00000073175	ENSMUSP00000073880	ENSMUSP00000099595	ENSMUSP00000099878	ENSMUSP00000105796	Ndufa13	Nqo1	Pdia3	Ppid	Rpl11	Rpl26	Rps29	Rps3	Rps6	Rps7	Sod2
GO:0043067	regulation of programmed cell death	20	1495	0.0385	ENSMUSP00000003947	ENSMUSP00000005647	ENSMUSP00000007012	ENSMUSP00000008826	ENSMUSP00000025645	ENSMUSP00000027050	ENSMUSP00000028683	ENSMUSP00000029382	ENSMUSP00000029699	ENSMUSP00000029722	ENSMUSP00000032998	ENSMUSP00000033699	ENSMUSP00000038352	ENSMUSP00000057543	ENSMUSP00000073175	ENSMUSP00000073880	ENSMUSP00000099595	ENSMUSP00000099878	ENSMUSP00000100026	ENSMUSP00000105796	Cntfr	Cops5	Flna	Gnai2	Lmna	Ndufa13	Ndufs3	Nqo1	Pdia3	Ppid	Rpl10	Rpl11	Rpl26	Rps29	Rps3	Rps3a1	Rps6	Rps7	Sod2	Tmem132a
GO:1901135	carbohydrate derivative metabolic process	14	882	0.0385	ENSMUSP00000000090	ENSMUSP00000013737	ENSMUSP00000022980	ENSMUSP00000023210	ENSMUSP00000026222	ENSMUSP00000027111	ENSMUSP00000027478	ENSMUSP00000033157	ENSMUSP00000036696	ENSMUSP00000042967	ENSMUSP00000065352	ENSMUSP00000079944	ENSMUSP00000121557	ENSMUSP00000136313	Cox5a	Cox5b	Cyc1	Gmds	Ndufa10	Ndufa12	Ndufa8	Ndufab1	Ndufb8	Ndufb9	Ndufs1	Ndufs2	Ndufv1	Ndufv2
GO:0045732	positive regulation of protein catabolic process	6	208	0.0414	ENSMUSP00000021049	ENSMUSP00000021595	ENSMUSP00000022380	ENSMUSP00000030769	ENSMUSP00000032824	ENSMUSP00000105796	Ndufa13	Psmc1	Psmc2	Psmc4	Psmc5	Psmc6
GO:1902231	positive regulation of intrinsic apoptotic signaling pathway in response to DNA damage	2	11	0.0414	ENSMUSP00000032998	ENSMUSP00000073175	Rpl26	Rps3
GO:0060548	negative regulation of cell death	15	1004	0.0466	ENSMUSP00000003947	ENSMUSP00000005647	ENSMUSP00000007012	ENSMUSP00000008826	ENSMUSP00000021595	ENSMUSP00000025645	ENSMUSP00000027050	ENSMUSP00000029699	ENSMUSP00000029722	ENSMUSP00000033699	ENSMUSP00000057543	ENSMUSP00000099878	ENSMUSP00000100026	ENSMUSP00000105796	ENSMUSP00000127005	Cntfr	Cops5	Flna	Gnai2	Lmna	Ndufa13	Ndufs3	Nqo1	Psmc1	Rpl10	Rps3a1	Rps6	Sod2	Tbc1d24	Tmem132a
[truncated: 221 more columns]

## Sheet: Molecular Function
#term ID	term description	observed gene count	background gene count	false discovery rate	matching proteins in your network (IDs)	matching proteins in your network (labels)
GO:0003735	structural constituent of ribosome	59	153	6.35e-79	ENSMUSP00000003521	ENSMUSP00000004072	ENSMUSP00000004554	ENSMUSP00000006496	ENSMUSP00000008812	ENSMUSP00000008826	ENSMUSP00000017548	ENSMUSP00000025511	ENSMUSP00000026420	ENSMUSP00000029722	ENSMUSP00000031617	ENSMUSP00000032998	ENSMUSP00000034966	ENSMUSP00000038352	ENSMUSP00000046506	ENSMUSP00000048469	ENSMUSP00000054490	ENSMUSP00000058432	ENSMUSP00000058919	ENSMUSP00000071616	ENSMUSP00000073175	ENSMUSP00000073880	ENSMUSP00000079163	ENSMUSP00000079180	ENSMUSP00000079340	ENSMUSP00000079628	ENSMUSP00000080354	ENSMUSP00000080523	ENSMUSP00000080854	ENSMUSP00000081474	ENSMUSP00000086614	ENSMUSP00000090305	ENSMUSP00000092502	ENSMUSP00000095287	ENSMUSP00000099435	ENSMUSP00000099595	ENSMUSP00000099757	ENSMUSP00000099878	ENSMUSP00000099909	ENSMUSP00000102213	ENSMUSP00000103365	ENSMUSP00000103940	ENSMUSP00000104067	ENSMUSP00000106014	ENSMUSP00000106249
GO:0005198	structural molecule activity	63	546	5.34e-56	ENSMUSP00000003521	ENSMUSP00000004072	ENSMUSP00000004554	ENSMUSP00000006496	ENSMUSP00000008812	ENSMUSP00000008826	ENSMUSP00000017548	ENSMUSP00000017572	ENSMUSP00000025511	ENSMUSP00000026420	ENSMUSP00000026560	ENSMUSP00000028062	ENSMUSP00000029699	ENSMUSP00000029722	ENSMUSP00000031617	ENSMUSP00000032998	ENSMUSP00000034966	ENSMUSP00000038352	ENSMUSP00000046506	ENSMUSP00000048469	ENSMUSP00000054490	ENSMUSP00000058432	ENSMUSP00000058919	ENSMUSP00000071616	ENSMUSP00000073175	ENSMUSP00000073880	ENSMUSP00000079163	ENSMUSP00000079180	ENSMUSP00000079340	ENSMUSP00000079628	ENSMUSP00000080354	ENSMUSP00000080523	ENSMUSP00000080854	ENSMUSP00000081474	ENSMUSP00000086614	ENSMUSP00000090305	ENSMUSP00000092502	ENSMUSP00000095287	ENSMUSP00000099435	ENSMUSP00000099595	ENSMUSP00000099757	ENSMUSP00000099878	ENSMUSP00000099909	ENSMUSP00000102213	ENSMUSP00000103365
GO:0003723	RNA binding	50	986	2.85e-27	ENSMUSP00000003521	ENSMUSP00000003912	ENSMUSP00000004072	ENSMUSP00000004554	ENSMUSP00000006496	ENSMUSP00000008812	ENSMUSP00000008826	ENSMUSP00000017548	ENSMUSP00000025511	ENSMUSP00000026420	ENSMUSP00000028062	ENSMUSP00000029722	ENSMUSP00000031617	ENSMUSP00000032998	ENSMUSP00000033776	ENSMUSP00000034966	ENSMUSP00000037613	ENSMUSP00000038580	ENSMUSP00000045841	ENSMUSP00000046506	ENSMUSP00000048153	ENSMUSP00000048469	ENSMUSP00000058919	ENSMUSP00000071616	ENSMUSP00000073175	ENSMUSP00000073880	ENSMUSP00000076989	ENSMUSP00000079163	ENSMUSP00000079340	ENSMUSP00000080354	ENSMUSP00000080854	ENSMUSP00000086614	ENSMUSP00000092502	ENSMUSP00000099435	ENSMUSP00000099595	ENSMUSP00000099878	ENSMUSP00000099933	ENSMUSP00000102213	ENSMUSP00000103365	ENSMUSP00000103940	ENSMUSP00000106014	ENSMUSP00000110013	ENSMUSP00000110532	ENSMUSP00000110886	ENSMUSP00000118787
GO:0019843	rRNA binding	18	67	2.55e-20	ENSMUSP00000003521	ENSMUSP00000004072	ENSMUSP00000004554	ENSMUSP00000006496	ENSMUSP00000008812	ENSMUSP00000017548	ENSMUSP00000025511	ENSMUSP00000031617	ENSMUSP00000032998	ENSMUSP00000034966	ENSMUSP00000046506	ENSMUSP00000058919	ENSMUSP00000071616	ENSMUSP00000080354	ENSMUSP00000080854	ENSMUSP00000099435	ENSMUSP00000099595	ENSMUSP00000126294	Rpl11	Rpl19	Rpl23	Rpl3	Rpl37	Rpl37a	Rpl4	Rpl5	Rpl6	Rpl7	Rpl8	Rps11	Rps13	Rps14	Rps18	Rps3	Rps5	Rps9
GO:0003954	NADH dehydrogenase activity	13	29	6.41e-17	ENSMUSP00000005647	ENSMUSP00000013737	ENSMUSP00000022286	ENSMUSP00000026222	ENSMUSP00000027111	ENSMUSP00000027478	ENSMUSP00000042967	ENSMUSP00000074600	ENSMUSP00000085523	ENSMUSP00000101003	ENSMUSP00000105796	ENSMUSP00000121557	ENSMUSP00000136313	Ndufa10	Ndufa12	Ndufa13	Ndufa9	Ndufb8	Ndufs1	Ndufs2	Ndufs3	Ndufs4	Ndufs7	Ndufs8	Ndufv1	Ndufv2
GO:0016655	oxidoreductase activity acting on NAD(P)H quinone or similar compound as acceptor	13	36	5.28e-16	ENSMUSP00000003947	ENSMUSP00000005647	ENSMUSP00000013737	ENSMUSP00000022286	ENSMUSP00000026222	ENSMUSP00000027111	ENSMUSP00000027478	ENSMUSP00000042967	ENSMUSP00000074600	ENSMUSP00000101003	ENSMUSP00000105796	ENSMUSP00000121557	ENSMUSP00000136313	Ndufa10	Ndufa12	Ndufa13	Ndufb8	Ndufs1	Ndufs2	Ndufs3	Ndufs4	Ndufs7	Ndufs8	Ndufv1	Ndufv2	Nqo1
GO:0008137	NADH dehydrogenase (ubiquinone) activity	12	26	7.94e-16	ENSMUSP00000005647	ENSMUSP00000013737	ENSMUSP00000022286	ENSMUSP00000026222	ENSMUSP00000027111	ENSMUSP00000027478	ENSMUSP00000042967	ENSMUSP00000074600	ENSMUSP00000101003	ENSMUSP00000105796	ENSMUSP00000121557	ENSMUSP00000136313	Ndufa10	Ndufa12	Ndufa13	Ndufb8	Ndufs1	Ndufs2	Ndufs3	Ndufs4	Ndufs7	Ndufs8	Ndufv1	Ndufv2
GO:0016651	oxidoreductase activity acting on NAD(P)H quinone or similar compound as acceptor	14	82	1.52e-13	ENSMUSP00000003947	ENSMUSP00000005647	ENSMUSP00000013737	ENSMUSP00000022286	ENSMUSP00000026222	ENSMUSP00000027111	ENSMUSP00000027478	ENSMUSP00000042967	ENSMUSP00000074600	ENSMUSP00000085523	ENSMUSP00000101003	ENSMUSP00000105796	ENSMUSP00000121557	ENSMUSP00000136313	Ndufa10	Ndufa12	Ndufa13	Ndufa9	Ndufb8	Ndufs1	Ndufs2	Ndufs3	Ndufs4	Ndufs7	Ndufs8	Ndufv1	Ndufv2	Nqo1
GO:0003729	mRNA binding	16	202	7.62e-11	ENSMUSP00000003912	ENSMUSP00000004554	ENSMUSP00000025511	ENSMUSP00000026420	ENSMUSP00000029722	ENSMUSP00000031617	ENSMUSP00000032998	ENSMUSP00000048153	ENSMUSP00000071616	ENSMUSP00000073175	ENSMUSP00000073880	ENSMUSP00000080854	ENSMUSP00000092502	ENSMUSP00000099878	ENSMUSP00000106014	ENSMUSP00000126294	Calr	Rbmxl1	Rpl26	Rpl30	Rpl5	Rpl6	Rpl7	Rps13	Rps14	Rps2	Rps26	Rps3	Rps3a1	Rps5	Rps6	Rps7
GO:0003676	nucleic acid binding	53	2868	1.36e-10	ENSMUSP00000003521	ENSMUSP00000003912	ENSMUSP00000004072	ENSMUSP00000004554	ENSMUSP00000005017	ENSMUSP00000006496	ENSMUSP00000007012	ENSMUSP00000008812	ENSMUSP00000008826	ENSMUSP00000017548	ENSMUSP00000025511	ENSMUSP00000026292	ENSMUSP00000026420	ENSMUSP00000028062	ENSMUSP00000029722	ENSMUSP00000031617	ENSMUSP00000032998	ENSMUSP00000033776	ENSMUSP00000034966	ENSMUSP00000037613	ENSMUSP00000038580	ENSMUSP00000045841	ENSMUSP00000046506	ENSMUSP00000048153	ENSMUSP00000048469	ENSMUSP00000058919	ENSMUSP00000071616	ENSMUSP00000073175	ENSMUSP00000073880	ENSMUSP00000076989	ENSMUSP00000079163	ENSMUSP00000079340	ENSMUSP00000080354	ENSMUSP00000080854	ENSMUSP00000086614	ENSMUSP00000092502	ENSMUSP00000099435	ENSMUSP00000099595	ENSMUSP00000099878	ENSMUSP00000099933	ENSMUSP00000102213	ENSMUSP00000103365	ENSMUSP00000103940	ENSMUSP00000106014	ENSMUSP00000110013
GO:0097159	organic cyclic compound binding	69	4818	1.96e-09	ENSMUSP00000003521	ENSMUSP00000003912	ENSMUSP00000004072	ENSMUSP00000004140	ENSMUSP00000004554	ENSMUSP00000005017	ENSMUSP00000006496	ENSMUSP00000007012	ENSMUSP00000008812	ENSMUSP00000008826	ENSMUSP00000013737	ENSMUSP00000017548	ENSMUSP00000021049	ENSMUSP00000021595	ENSMUSP00000022380	ENSMUSP00000023210	ENSMUSP00000025511	ENSMUSP00000026292	ENSMUSP00000026420	ENSMUSP00000028062	ENSMUSP00000029382	ENSMUSP00000029722	ENSMUSP00000030769	ENSMUSP00000031617	ENSMUSP00000032824	ENSMUSP00000032998	ENSMUSP00000033776	ENSMUSP00000034588	ENSMUSP00000034966	ENSMUSP00000036696	ENSMUSP00000037613	ENSMUSP00000038580	ENSMUSP00000042967	ENSMUSP00000045841	ENSMUSP00000046506	ENSMUSP00000048153	ENSMUSP00000048469	ENSMUSP00000057543	ENSMUSP00000058919	ENSMUSP00000071616	ENSMUSP00000073175	ENSMUSP00000073880	ENSMUSP00000074724	ENSMUSP00000076989	ENSMUSP00000079163
GO:1901363	heterocyclic compound binding	67	4748	8.41e-09	ENSMUSP00000003521	ENSMUSP00000003912	ENSMUSP00000004072	ENSMUSP00000004554	ENSMUSP00000005017	ENSMUSP00000006496	ENSMUSP00000007012	ENSMUSP00000008812	ENSMUSP00000008826	ENSMUSP00000013737	ENSMUSP00000017548	ENSMUSP00000021049	ENSMUSP00000021595	ENSMUSP00000022380	ENSMUSP00000023210	ENSMUSP00000025511	ENSMUSP00000026292	ENSMUSP00000026420	ENSMUSP00000028062	ENSMUSP00000029382	ENSMUSP00000029722	ENSMUSP00000030769	ENSMUSP00000031617	ENSMUSP00000032824	ENSMUSP00000032998	ENSMUSP00000033776	ENSMUSP00000034966	ENSMUSP00000036696	ENSMUSP00000037613	ENSMUSP00000038580	ENSMUSP00000042967	ENSMUSP00000045841	ENSMUSP00000046506	ENSMUSP00000048153	ENSMUSP00000048469	ENSMUSP00000057543	ENSMUSP00000058919	ENSMUSP00000071616	ENSMUSP00000073175	ENSMUSP00000073880	ENSMUSP00000074724	ENSMUSP00000076989	ENSMUSP00000079163	ENSMUSP00000079340	ENSMUSP00000080354
GO:0036402	proteasome-activating ATPase activity	5	6	1.73e-07	ENSMUSP00000021049	ENSMUSP00000021595	ENSMUSP00000022380	ENSMUSP00000030769	ENSMUSP00000032824	Psmc1	Psmc2	Psmc4	Psmc5	Psmc6
GO:0005488	binding	108	10884	4.45e-07	ENSMUSP00000000090	ENSMUSP00000003521	ENSMUSP00000003912	ENSMUSP00000003947	ENSMUSP00000004072	ENSMUSP00000004140	ENSMUSP00000004554	ENSMUSP00000005017	ENSMUSP00000006496	ENSMUSP00000007012	ENSMUSP00000008812	ENSMUSP00000008826	ENSMUSP00000013737	ENSMUSP00000017548	ENSMUSP00000021049	ENSMUSP00000021595	ENSMUSP00000022380	ENSMUSP00000023210	ENSMUSP00000023502	ENSMUSP00000025511	ENSMUSP00000025851	ENSMUSP00000026292	ENSMUSP00000026420	ENSMUSP00000027050	ENSMUSP00000027111	ENSMUSP00000027432	ENSMUSP00000028062	ENSMUSP00000028278	ENSMUSP00000028681	ENSMUSP00000028683	ENSMUSP00000029382	ENSMUSP00000029699	ENSMUSP00000029722	ENSMUSP00000030769	ENSMUSP00000031617	ENSMUSP00000031779	ENSMUSP00000032203	ENSMUSP00000032824	ENSMUSP00000032998	ENSMUSP00000033157	ENSMUSP00000033176	ENSMUSP00000033699	ENSMUSP00000033776	ENSMUSP00000034588	ENSMUSP00000034966
GO:0016491	oxidoreductase activity	21	700	4.7e-07	ENSMUSP00000000090	ENSMUSP00000003947	ENSMUSP00000005647	ENSMUSP00000007012	ENSMUSP00000013737	ENSMUSP00000014457	ENSMUSP00000022286	ENSMUSP00000023210	ENSMUSP00000026222	ENSMUSP00000027111	ENSMUSP00000027478	ENSMUSP00000028683	ENSMUSP00000042967	ENSMUSP00000074600	ENSMUSP00000079944	ENSMUSP00000085523	ENSMUSP00000101003	ENSMUSP00000105796	ENSMUSP00000114304	ENSMUSP00000121557	ENSMUSP00000136313	Aldh1l1	Cox5a	Cox5b	Cox6c	Cyc1	Ndufa10	Ndufa12	Ndufa13	Ndufa9	Ndufb8	Ndufs1	Ndufs2	Ndufs3	Ndufs4	Ndufs7	Ndufs8	Ndufv1	Ndufv2	Nqo1	Pdia3	Sod2
GO:0140296	general transcription initiation factor binding	7	41	7.91e-07	ENSMUSP00000021049	ENSMUSP00000021595	ENSMUSP00000022380	ENSMUSP00000030769	ENSMUSP00000032824	ENSMUSP00000037613	ENSMUSP00000140250	Fbl	Nop58	Psmc1	Psmc2	Psmc4	Psmc5	Psmc6
GO:0048027	mRNA 5'-UTR binding	6	24	1.02e-06	ENSMUSP00000025511	ENSMUSP00000029722	ENSMUSP00000073175	ENSMUSP00000073880	ENSMUSP00000080854	ENSMUSP00000126294	Rpl26	Rpl5	Rps13	Rps14	Rps3a1	Rps7
GO:0008097	5S rRNA binding	5	13	2.28e-06	ENSMUSP00000034966	ENSMUSP00000071616	ENSMUSP00000080354	ENSMUSP00000080854	ENSMUSP00000099595	Rpl11	Rpl3	Rpl4	Rpl5	Rpl7
GO:1990948	ubiquitin ligase inhibitor activity	4	6	8.4e-06	ENSMUSP00000073880	ENSMUSP00000080854	ENSMUSP00000099435	ENSMUSP00000099595	Rpl11	Rpl23	Rpl5	Rps7
GO:0017025	TBP-class protein binding	5	25	3.07e-05	ENSMUSP00000021049	ENSMUSP00000021595	ENSMUSP00000022380	ENSMUSP00000030769	ENSMUSP00000032824	Psmc1	Psmc2	Psmc4	Psmc5	Psmc6
GO:0044877	protein-containing complex binding	23	1094	3.19e-05	ENSMUSP00000003912	ENSMUSP00000023502	ENSMUSP00000028062	ENSMUSP00000028278	ENSMUSP00000029722	ENSMUSP00000032998	ENSMUSP00000033176	ENSMUSP00000033699	ENSMUSP00000034588	ENSMUSP00000037613	ENSMUSP00000042123	ENSMUSP00000057543	ENSMUSP00000058432	ENSMUSP00000065352	ENSMUSP00000085523	ENSMUSP00000086640	ENSMUSP00000092502	ENSMUSP00000104067	ENSMUSP00000110731	ENSMUSP00000112259	ENSMUSP00000114304	ENSMUSP00000125977	ENSMUSP00000140250	Aldh1l1	Apoa1	Calr	Cfl1	Fbl	Flna	Gnai2	Lasp1	Ndufa8	Ndufa9	Nop58	Ppp2r2a	Psmd14	Rpl35a	Rps19	Rps2	Rps21	Rps24	Rps3	Rps3a1	Snx4	Uqcrc2
GO:1990932	5.8S rRNA binding	3	3	0.0001	ENSMUSP00000006496	ENSMUSP00000017548	ENSMUSP00000031617	Rpl19	Rpl6	Rps9
GO:0051536	iron-sulfur cluster binding	6	63	0.00012	ENSMUSP00000013737	ENSMUSP00000027111	ENSMUSP00000042967	ENSMUSP00000074600	ENSMUSP00000101003	ENSMUSP00000121557	Ndufs1	Ndufs2	Ndufs7	Ndufs8	Ndufv1	Ndufv2
GO:0009055	electron transfer activity	6	65	0.00013	ENSMUSP00000000090	ENSMUSP00000014457	ENSMUSP00000023210	ENSMUSP00000027111	ENSMUSP00000079944	ENSMUSP00000136313	Cox5a	Cox5b	Cox6c	Cyc1	Ndufa12	Ndufs1
GO:0051539	4 iron 4 sulfur cluster binding	5	39	0.00017	ENSMUSP00000013737	ENSMUSP00000027111	ENSMUSP00000042967	ENSMUSP00000074600	ENSMUSP00000101003	Ndufs1	Ndufs2	Ndufs7	Ndufs8	Ndufv1
GO:0019899	enzyme binding	32	2175	0.00034	ENSMUSP00000003912	ENSMUSP00000004140	ENSMUSP00000007012	ENSMUSP00000008812	ENSMUSP00000013737	ENSMUSP00000027050	ENSMUSP00000027432	ENSMUSP00000028062	ENSMUSP00000029382	ENSMUSP00000029699	ENSMUSP00000031779	ENSMUSP00000032203	ENSMUSP00000032998	ENSMUSP00000033699	ENSMUSP00000034588	ENSMUSP00000037613	ENSMUSP00000045841	ENSMUSP00000068971	ENSMUSP00000073880	ENSMUSP00000080854	ENSMUSP00000085986	ENSMUSP00000086640	ENSMUSP00000092502	ENSMUSP00000099435	ENSMUSP00000099595	ENSMUSP00000099878	ENSMUSP00000099933	ENSMUSP00000101003	ENSMUSP00000104067	ENSMUSP00000112259	ENSMUSP00000132082	ENSMUSP00000140250	A2m	Apoa1	Arfgef1	Calr	Calu	Cfl1	Cops5	Eprs	Fbl	Flna	Gstm1	Iars	Lmna
GO:0070180	large ribosomal subunit rRNA binding	3	6	0.00034	ENSMUSP00000017548	ENSMUSP00000058919	ENSMUSP00000099435	Rpl19	Rpl23	Rpl37a
GO:0070181	small ribosomal subunit rRNA binding	3	8	0.00062	ENSMUSP00000025511	ENSMUSP00000032998	ENSMUSP00000126294	Rps13	Rps14	Rps3
GO:0008134	transcription factor binding	13	644	0.0067	ENSMUSP00000003912	ENSMUSP00000005017	ENSMUSP00000021049	ENSMUSP00000021595	ENSMUSP00000022380	ENSMUSP00000029382	ENSMUSP00000030769	ENSMUSP00000032824	ENSMUSP00000032998	ENSMUSP00000033699	ENSMUSP00000037613	ENSMUSP00000099435	ENSMUSP00000140250	Calr	Fbl	Flna	Hdgf	Nop58	Ppid	Psmc1	Psmc2	Psmc4	Psmc5	Psmc6	Rpl23	Rps3
GO:0004129	cytochrome-c oxidase activity	3	22	0.0076	ENSMUSP00000000090	ENSMUSP00000014457	ENSMUSP00000079944	Cox5a	Cox5b	Cox6c
GO:0048037	cofactor binding	11	493	0.0076	ENSMUSP00000004140	ENSMUSP00000013737	ENSMUSP00000023210	ENSMUSP00000027111	ENSMUSP00000033157	ENSMUSP00000036696	ENSMUSP00000042967	ENSMUSP00000074600	ENSMUSP00000101003	ENSMUSP00000114705	ENSMUSP00000121557	Cyc1	Dbi	Gmds	Gstm1	Ndufab1	Ndufs1	Ndufs2	Ndufs7	Ndufs8	Ndufv1	Ndufv2
GO:0004784	superoxide dismutase activity	2	5	0.0098	ENSMUSP00000003947	ENSMUSP00000007012	Nqo1	Sod2
GO:0030234	enzyme regulator activity	15	894	0.013	ENSMUSP00000017365	ENSMUSP00000022256	ENSMUSP00000027432	ENSMUSP00000028278	ENSMUSP00000028681	ENSMUSP00000031779	ENSMUSP00000032203	ENSMUSP00000034588	ENSMUSP00000068971	ENSMUSP00000073880	ENSMUSP00000080854	ENSMUSP00000086640	ENSMUSP00000099435	ENSMUSP00000099595	ENSMUSP00000127005	A2m	Apoa1	Calu	F2	Ppp2r2a	Psmd1	Psmd14	Psmd3	Psmd6	Rpl11	Rpl23	Rpl5	Rps7	Serpinc1	Tbc1d24
GO:0030515	snoRNA binding	3	29	0.013	ENSMUSP00000033776	ENSMUSP00000038580	ENSMUSP00000140250	Dkc1	Nop58	Rrp9
GO:0031369	translation initiation factor binding	3	36	0.0222	ENSMUSP00000029722	ENSMUSP00000104067	ENSMUSP00000125977	Rps19	Rps24	Rps3a1
GO:0001094	TFIID-class transcription factor complex binding	2	9	0.0224	ENSMUSP00000037613	ENSMUSP00000140250	Fbl	Nop58
GO:0004857	enzyme inhibitor activity	8	368	0.0377	ENSMUSP00000031779	ENSMUSP00000032203	ENSMUSP00000034588	ENSMUSP00000068971	ENSMUSP00000073880	ENSMUSP00000080854	ENSMUSP00000099435	ENSMUSP00000099595	A2m	Apoa1	Calu	Rpl11	Rpl23	Rpl5	Rps7	Serpinc1
GO:1901681	sulfur compound binding	6	221	0.0404	ENSMUSP00000004140	ENSMUSP00000005017	ENSMUSP00000028681	ENSMUSP00000068971	ENSMUSP00000114705	ENSMUSP00000118787	Dbi	F2	Gstm1	Hdgf	Rpl22	Serpinc1
GO:0048038	quinone binding	2	14	0.0448	ENSMUSP00000013737	ENSMUSP00000101003	Ndufs2	Ndufs7
[truncated: 171 more columns]

## Sheet: string_interactions
#node1	node2	node1_string_internal_id	node2_string_internal_id	node1_external_id	node2_external_id	neighborhood_on_chromosome	gene_fusion	phylogenetic_cooccurrence	homology	coexpression	experimentally_determined_interaction		database_annotated		automated_textmining		combined_score
Rpl18	Rpl4	5031793	5021039	10090.ENSMUSP00000103365	10090.ENSMUSP00000034966	0.17	0	0	0	0.893	0.816	1	0.9	1	0.699	1	0.999
Rpl15	Rpl7	5027943	5026693	10090.ENSMUSP00000079163	10090.ENSMUSP00000071616	0	0	0	0	0.907	0.956	1	0.72	1	0.635	1	0.999
Cox5b	Cyc1	5028064	5017751	10090.ENSMUSP00000079944	10090.ENSMUSP00000023210	0	0	0	0	0.902	0.729	1	0.9	1	0.684	1	0.999
Rps17	Rpl19	5028013	5016512	10090.ENSMUSP00000079628	10090.ENSMUSP00000017548	0	0	0	0	0.948	0.972	1	0	0	0.695	1	0.999
Rpl39	Rpl37	5033187	5023036	10090.ENSMUSP00000110886	10090.ENSMUSP00000046506	0	0	0	0	0.826	0.971	1	0.72	1	0.543	1	0.999
Rps27	Rpl22	5035720	5034020	10090.ENSMUSP00000132102	10090.ENSMUSP00000118787	0	0	0	0	0.736	0.958	1	0.9	1	0.632	1	0.999
Rps27a	Rps25	5031143	5027947	10090.ENSMUSP00000099909	10090.ENSMUSP00000079180	0	0	0	0	0.932	0.89	1	0.9	1	0.593	1	0.999
Ndufa8	Ndufb9	5025925	5017677	10090.ENSMUSP00000065352	10090.ENSMUSP00000022980	0	0	0	0	0.911	0.955	1	0.9	1	0.463	1	0.999
Rps7	Rps3	5027079	5020408	10090.ENSMUSP00000073880	10090.ENSMUSP00000032998	0	0	0	0	0.899	0.95	1	0.9	1	0.392	1	0.999
Rpl31	Rpl27	5036727	5029225	10090.ENSMUSP00000137631	10090.ENSMUSP00000090305	0	0	0	0	0.837	0.958	1	0.72	1	0.702	1	0.999
Rps16	Rps8	5031918	5031065	10090.ENSMUSP00000103940	10090.ENSMUSP00000099757	0	0	0	0	0.999	0.971	1	0.72	1	0.826	1	0.999
Rps6	Rpl26	5031125	5026969	10090.ENSMUSP00000099878	10090.ENSMUSP00000073175	0	0	0	0	0.934	0.971	1	0.9	1	0.763	1	0.999
Rps7	Rpl37a	5027079	5025033	10090.ENSMUSP00000073880	10090.ENSMUSP00000058919	0	0	0	0	0.928	0.95	1	0.9	1	0	0	0.999
Rpl23	Rps7	5030904	5027079	10090.ENSMUSP00000099435	10090.ENSMUSP00000073880	0	0	0	0	0.912	0.95	1	0.9	1	0.306	1	0.999
Rpl38	Rps5	5031605	5015759	10090.ENSMUSP00000102213	10090.ENSMUSP00000004554	0	0	0	0	0.911	0.896	1	0.9	1	0.517	1	0.999
Rpl15	Rpl10a	5027943	5023403	10090.ENSMUSP00000079163	10090.ENSMUSP00000048469	0	0	0	0	0.926	0.958	1	0.72	1	0.359	1	0.999
Rpl36a	Rpl10a	5032811	5023403	10090.ENSMUSP00000108837	10090.ENSMUSP00000048469	0	0	0	0	0.912	0.958	1	0.72	1	0.609	1	0.999
Rpl4	Rpl6	5021039	5020043	10090.ENSMUSP00000034966	10090.ENSMUSP00000031617	0.088	0	0	0	0.871	0.791	1	0.9	1	0.715	1	0.999
Psmc1	Psmd12	5017247	5017092	10090.ENSMUSP00000021595	10090.ENSMUSP00000021063	0	0	0	0	0.817	0.886	1	0.9	1	0.799	1	0.999
Rps16	Rps21	5031918	5024953	10090.ENSMUSP00000103940	10090.ENSMUSP00000058432	0	0	0	0	0.941	0.896	1	0.72	1	0.619	1	0.999
Rps27a	Rps17	5031143	5028013	10090.ENSMUSP00000099909	10090.ENSMUSP00000079628	0	0	0	0	0.952	0.896	1	0.72	1	0.498	1	0.999
Rpl39	Rpl18	5033187	5031793	10090.ENSMUSP00000110886	10090.ENSMUSP00000103365	0.089	0	0	0	0.854	0.962	1	0.72	1	0.489	1	0.999
Rpl31	Rps25	5036727	5027947	10090.ENSMUSP00000137631	10090.ENSMUSP00000079180	0	0	0	0	0.916	0.971	1	0	0	0.801	1	0.999
Rpl18	Rps25	5031793	5027947	10090.ENSMUSP00000103365	10090.ENSMUSP00000079180	0	0	0	0	0.91	0.884	1	0.9	1	0.565	1	0.999
Rpl14	Rpl23	5035620	5030904	10090.ENSMUSP00000131489	10090.ENSMUSP00000099435	0.153	0	0	0	0.916	0.869	1	0.9	1	0.185	1	0.999
Rpl35a	Rpl36a	5033146	5032811	10090.ENSMUSP00000110731	10090.ENSMUSP00000108837	0	0	0	0	0.865	0.958	1	0.72	1	0.597	1	0.999
Rps10	Rps23	5033114	5024346	10090.ENSMUSP00000110532	10090.ENSMUSP00000054490	0	0	0	0	0.817	0.958	1	0.72	1	0.598	1	0.999
Rps15a	Rps27a	5034103	5031143	10090.ENSMUSP00000119975	10090.ENSMUSP00000099909	0	0	0	0	0.896	0.896	1	0.9	1	0.426	1	0.999
Rpl4	Rps3	5021039	5020408	10090.ENSMUSP00000034966	10090.ENSMUSP00000032998	0.17	0	0	0	0.999	0.8	1	0.9	1	0.73	1	0.999
Psmd8	Psmd11	5023901	5016515	10090.ENSMUSP00000051657	10090.ENSMUSP00000017572	0	0	0	0	0.769	0.889	1	0.9	1	0.818	1	0.999
Rpl26	Rps18	5026969	5016094	10090.ENSMUSP00000073175	10090.ENSMUSP00000008812	0.139	0	0	0	0.833	0.95	1	0.9	1	0.412	1	0.999
Rpl6	Rps3a1	5020043	5019462	10090.ENSMUSP00000031617	10090.ENSMUSP00000029722	0	0	0	0	0.873	0.797	1	0.9	1	0.723	1	0.999
Rps8	Rpl37a	5031065	5025033	10090.ENSMUSP00000099757	10090.ENSMUSP00000058919	0	0	0	0	0.97	0.97	1	0.9	1	0.553	1	0.999
Rpl37a	Rpl8	5025033	5015714	10090.ENSMUSP00000058919	10090.ENSMUSP00000004072	0	0	0	0	0.936	0.97	1	0.9	1	0.528	1	0.999
Rpl30	Rpl15	5032315	5027943	10090.ENSMUSP00000106014	10090.ENSMUSP00000079163	0	0	0	0	0.866	0.958	1	0.72	1	0.504	1	0.999
Rpl23	Rpl37a	5030904	5025033	10090.ENSMUSP00000099435	10090.ENSMUSP00000058919	0	0	0	0	0.961	0.97	1	0.9	1	0.127	1	0.999
Rrp9	Fbl	5021708	5021545	10090.ENSMUSP00000038580	10090.ENSMUSP00000037613	0	0	0	0	0.792	0.791	1	0.9	1	0.804	1	0.999
Rpl26	Rpl37a	5026969	5025033	10090.ENSMUSP00000073175	10090.ENSMUSP00000058919	0	0	0.288	0	0.978	0.97	1	0.9	1	0.506	1	0.999
Rpl37	Rps14	5023036	5018277	10090.ENSMUSP00000046506	10090.ENSMUSP00000025511	0	0	0	0	0.827	0.971	1	0.9	1	0.698	1	0.999
Rpl23	Rpl26	5030904	5026969	10090.ENSMUSP00000099435	10090.ENSMUSP00000073175	0.172	0	0.229	0	0.957	0.971	1	0.9	1	0.545	1	0.999
Ndufa6	Ndufs3	5017711	5015856	10090.ENSMUSP00000023085	10090.ENSMUSP00000005647	0	0	0	0	0.843	0.971	1	0.9	1	0.712	1	0.999
Psmd13	Psmd6	5018587	5017456	10090.ENSMUSP00000026560	10090.ENSMUSP00000022256	0	0	0	0	0.81	0.797	1	0.9	1	0.823	1	0.999
Psmd7	Psmd11	5022298	5016515	10090.ENSMUSP00000041968	10090.ENSMUSP00000017572	0	0	0	0	0.809	0.896	1	0.9	1	0.853	1	0.999
Psmd7	Psmd1	5022298	5018807	10090.ENSMUSP00000041968	10090.ENSMUSP00000027432	0	0	0	0	0.816	0.82	1	0.9	1	0.838	1	0.999
Rpl39	Rpl27-ps3	5033187	5029953	10090.ENSMUSP00000110886	10090.ENSMUSP00000095287	0	0	0	0	0.809	0.958	1	0.72	1	0.648	1	0.999
Rps3	Rpl6	5020408	5020043	10090.ENSMUSP00000032998	10090.ENSMUSP00000031617	0.153	0	0	0	0.872	0.752	1	0.9	1	0.791	1	0.999
Rps29	Rps3	5021660	5020408	10090.ENSMUSP00000038352	10090.ENSMUSP00000032998	0.17	0	0	0	0.818	0.971	1	0.72	1	0.413	1	0.999
Rpl31	Rpl7	5036727	5026693	10090.ENSMUSP00000137631	10090.ENSMUSP00000071616	0	0	0	0	0.923	0.96	1	0.72	1	0.636	1	0.999
Rps15a	Rpl8	5034103	5015714	10090.ENSMUSP00000119975	10090.ENSMUSP00000004072	0.172	0	0.201	0	0.926	0.972	1	0.9	1	0.425	1	0.999
Ndufs1	Ndufs2	5018711	5016267	10090.ENSMUSP00000027111	10090.ENSMUSP00000013737	0.193	0	0.333	0	0.902	0.962	1	0.9	1	0.856	1	0.999
Rps6	Rpl19	5031125	5016512	10090.ENSMUSP00000099878	10090.ENSMUSP00000017548	0	0	0	0	0.941	0.971	1	0.9	1	0.691	1	0.999
Rps24	Rpl5	5034648	5028222	10090.ENSMUSP00000125977	10090.ENSMUSP00000080854	0	0	0	0	0.999	0.817	1	0	0	0.911	1	0.999
Ndufs7	Ndufs3	5031381	5015856	10090.ENSMUSP00000101003	10090.ENSMUSP00000005647	0.193	0	0.432	0	0.922	0.959	1	0.9	1	0.874	1	0.999
Rps24	Rps16	5034648	5031918	10090.ENSMUSP00000125977	10090.ENSMUSP00000103940	0	0	0	0	0.902	0.97	1	0.72	1	0.625	1	0.999
Rpl18	Rpl37	5031793	5023036	10090.ENSMUSP00000103365	10090.ENSMUSP00000046506	0	0	0	0	0.826	0.97	1	0.9	1	0.359	1	0.999
Rps23	Rps5	5024346	5015759	10090.ENSMUSP00000054490	10090.ENSMUSP00000004554	0.164	0	0	0	0.897	0.972	1	0.9	1	0.567	1	0.999
Rpl31	Rps26	5036727	5018537	10090.ENSMUSP00000137631	10090.ENSMUSP00000026420	0	0	0	0	0.862	0.958	1	0.72	1	0.684	1	0.999
Rpl18	Rpl15	5031793	5027943	10090.ENSMUSP00000103365	10090.ENSMUSP00000079163	0	0	0	0	0.864	0.958	1	0.72	1	0.574	1	0.999
Rps10	Rps8	5033114	5031065	10090.ENSMUSP00000110532	10090.ENSMUSP00000099757	0	0	0	0	0.893	0.958	1	0.72	1	0.705	1	0.999
Rps17	Rps29	5028013	5021660	10090.ENSMUSP00000079628	10090.ENSMUSP00000038352	0	0	0	0	0.911	0.971	1	0.72	1	0.773	1	0.999
Rps15a	Rps29	5034103	5021660	10090.ENSMUSP00000119975	10090.ENSMUSP00000038352	0.17	0	0	0	0.832	0.971	1	0.72	1	0.652	1	0.999
Rpl35a	Rps9	5033146	5015940	10090.ENSMUSP00000110731	10090.ENSMUSP00000006496	0	0	0	0	0.91	0.971	1	0.9	1	0.266	1	0.999
Rps27a	Rps8	5031143	5031065	10090.ENSMUSP00000099909	10090.ENSMUSP00000099757	0	0	0	0	0.929	0.896	1	0.9	1	0.151	1	0.999
Rpl30	Rpl26	5032315	5026969	10090.ENSMUSP00000106014	10090.ENSMUSP00000073175	0	0	0.24	0	0.938	0.971	1	0.9	1	0.787	1	0.999
Rps19	Rps11	5031943	5015656	10090.ENSMUSP00000104067	10090.ENSMUSP00000003521	0	0	0	0	0.999	0.896	1	0.9	1	0.675	1	0.999
Rps13	Rps3	5034698	5020408	10090.ENSMUSP00000126294	10090.ENSMUSP00000032998	0	0	0	0	0.915	0.972	1	0.9	1	0.721	1	0.999
Rps23	Rps29	5024346	5021660	10090.ENSMUSP00000054490	10090.ENSMUSP00000038352	0.139	0	0	0	0.863	0.971	1	0.72	1	0.477	1	0.999
Rps14	Rps5	5018277	5015759	10090.ENSMUSP00000025511	10090.ENSMUSP00000004554	0.164	0	0	0	0.999	0.971	1	0.9	1	0.806	1	0.999
Psmd7	Psmd3	5022298	5016500	10090.ENSMUSP00000041968	10090.ENSMUSP00000017365	0	0	0	0	0.801	0.817	1	0.9	1	0.855	1	0.999
Psmd14	Psmd12	5019035	5017092	10090.ENSMUSP00000028278	10090.ENSMUSP00000021063	0	0	0	0	0.915	0.896	1	0.9	1	0.825	1	0.999
Rpl37a	Rpl37	5025033	5023036	10090.ENSMUSP00000058919	10090.ENSMUSP00000046506	0	0	0	0	0.844	0.97	1	0.9	1	0.792	1	0.999
Rps29	Rps3a1	5021660	5019462	10090.ENSMUSP00000038352	10090.ENSMUSP00000029722	0	0	0	0	0.838	0.961	1	0.72	1	0.574	1	0.999
Rps25	Rps14	5027947	5018277	10090.ENSMUSP00000079180	10090.ENSMUSP00000025511	0	0	0	0	0.999	0.97	1	0.9	1	0.848	1	0.999
Rps23	Rpl4	5024346	5021039	10090.ENSMUSP00000054490	10090.ENSMUSP00000034966	0.139	0	0	0	0.883	0.846	1	0.9	1	0.735	1	0.999
Rpl38	Rps6	5031605	5031125	10090.ENSMUSP00000102213	10090.ENSMUSP00000099878	0	0	0	0	0.88	0.896	1	0.9	1	0.695	1	0.999
Rps17	Rps14	5028013	5018277	10090.ENSMUSP00000079628	10090.ENSMUSP00000025511	0	0	0	0	0.909	0.971	1	0.72	1	0.879	1	0.999
Rpl35a	Rpl10a	5033146	5023403	10090.ENSMUSP00000110731	10090.ENSMUSP00000048469	0	0	0	0	0.934	0.971	1	0.9	1	0.267	1	0.999
Rps6	Rpl3	5031125	5028126	10090.ENSMUSP00000099878	10090.ENSMUSP00000080354	0	0	0	0	0.999	0.851	1	0.9	1	0.595	1	0.999
Rps17	Rps3a1	5028013	5019462	10090.ENSMUSP00000079628	10090.ENSMUSP00000029722	0	0	0	0	0.909	0.971	1	0.72	1	0.491	1	0.999
Rps15a	Rpl37	5034103	5023036	10090.ENSMUSP00000119975	10090.ENSMUSP00000046506	0	0	0	0	0.856	0.972	1	0.9	1	0.493	1	0.999
Ndufa12	Ndufs7	5036277	5031381	10090.ENSMUSP00000136313	10090.ENSMUSP00000101003	0	0	0	0	0.731	0.956	1	0.9	1	0.607	1	0.999
Rpl30	Rps5	5032315	5015759	10090.ENSMUSP00000106014	10090.ENSMUSP00000004554	0.172	0	0	0	0.893	0.971	1	0.9	1	0.657	1	0.999
Rpl10a	Rpl10	5023403	5016095	10090.ENSMUSP00000048469	10090.ENSMUSP00000008826	0.098	0	0	0	0.921	0.957	1	0.72	1	0.526	1	0.999
Rps29	Rps5	5021660	5015759	10090.ENSMUSP00000038352	10090.ENSMUSP00000004554	0.139	0	0	0	0.906	0.971	1	0.72	1	0.589	1	0.999
Rps20	Rps16	5034139	5031918	10090.ENSMUSP00000120528	10090.ENSMUSP00000103940	0.139	0	0	0	0.929	0.972	1	0.72	1	0.718	1	0.999
Ndufa10	Ndufs3	5018820	5015856	10090.ENSMUSP00000027478	10090.ENSMUSP00000005647	0	0	0	0	0.573	0.931	1	0.9	1	0.725	1	0.999
Ndufab1	Ndufb9	5020457	5017677	10090.ENSMUSP00000033157	10090.ENSMUSP00000022980	0	0	0	0	0.817	0.97	1	0.9	1	0.538	1	0.999
Ndufa13	Ndufs3	5032274	5015856	10090.ENSMUSP00000105796	10090.ENSMUSP00000005647	0	0	0	0	0.832	0.955	1	0.9	1	0.525	1	0.999
Rpl35a	Rps6	5033146	5031125	10090.ENSMUSP00000110731	10090.ENSMUSP00000099878	0	0	0	0	0.92	0.971	1	0.9	1	0.537	1	0.999
Rps28	Rps29	5033019	5021660	10090.ENSMUSP00000110013	10090.ENSMUSP00000038352	0	0	0	0	0.946	0.958	1	0.72	1	0.703	1	0.999
Rps20	Rpl19	5034139	5016512	10090.ENSMUSP00000120528	10090.ENSMUSP00000017548	0	0	0	0	0.964	0.971	1	0	0	0.577	1	0.999
Rpl36al	Rpl10a	5032361	5023403	10090.ENSMUSP00000106249	10090.ENSMUSP00000048469	0	0	0	0	0.818	0.958	1	0.72	1	0.609	1	0.999
Psmd12	Psmd11	5017092	5016515	10090.ENSMUSP00000021063	10090.ENSMUSP00000017572	0	0	0	0	0.827	0.887	1	0.9	1	0.836	1	0.999
Rpl10	Rpl8	5016095	5015714	10090.ENSMUSP00000008826	10090.ENSMUSP00000004072	0.098	0	0	0	0.914	0.958	1	0.72	1	0.645	1	0.999
Rpl37	Rps3	5023036	5020408	10090.ENSMUSP00000046506	10090.ENSMUSP00000032998	0	0	0	0	0.828	0.972	1	0.9	1	0.709	1	0.999
Rps15a	Rps5	5034103	5015759	10090.ENSMUSP00000119975	10090.ENSMUSP00000004554	0.172	0	0	0	0.999	0.972	1	0.9	1	0.631	1	0.999
Ndufs8	Ndufa8	5027191	5025925	10090.ENSMUSP00000074600	10090.ENSMUSP00000065352	0	0	0	0	0.886	0.959	1	0.9	1	0.469	1	0.999
Rps15a	Rpl19	5034103	5016512	10090.ENSMUSP00000119975	10090.ENSMUSP00000017548	0.193	0	0.272	0	0.93	0.972	1	0.9	1	0.361	1	0.999
Rps19	Rpl37a	5031943	5025033	10090.ENSMUSP00000104067	10090.ENSMUSP00000058919	0	0	0	0	0.941	0.889	1	0.9	1	0.509	1	0.999
Rps15a	Rps25	5034103	5027947	10090.ENSMUSP00000119975	10090.ENSMUSP00000079180	0	0	0	0	0.999	0.972	1	0.9	1	0.663	1	0.999
Rps25	Rpl37	5027947	5023036	10090.ENSMUSP00000079180	10090.ENSMUSP00000046506	0	0	0	0	0.85	0.972	1	0.9	1	0.6	1	0.999
Rpl39	Rpl23	5033187	5030904	10090.ENSMUSP00000110886	10090.ENSMUSP00000099435	0.046	0	0	0	0.912	0.97	1	0.72	1	0.215	1	0.999
Rpl32	Rpl19	5028158	5016512	10090.ENSMUSP00000080523	10090.ENSMUSP00000017548	0.172	0	0	0	0.96	0.971	1	0.9	1	0.596	1	0.999
Rpl31	Rps5	5036727	5015759	10090.ENSMUSP00000137631	10090.ENSMUSP00000004554	0	0	0	0	0.887	0.971	1	0	0	0.717	1	0.999
Rpl18	Rpl37a	5031793	5025033	10090.ENSMUSP00000103365	10090.ENSMUSP00000058919	0.046	0	0	0	0.941	0.969	1	0.9	1	0.237	1	0.999
Rpl22	Rpl8	5034020	5015714	10090.ENSMUSP00000118787	10090.ENSMUSP00000004072	0	0	0	0	0.847	0.971	1	0.9	1	0.181	1	0.999
Rpl32	Rpl7	5028158	5026693	10090.ENSMUSP00000080523	10090.ENSMUSP00000071616	0.119	0	0	0	0.911	0.958	1	0.9	1	0.345	1	0.999
Rpl15	Rpl19	5027943	5016512	10090.ENSMUSP00000079163	10090.ENSMUSP00000017548	0	0	0.391	0	0.909	0.958	1	0.72	1	0.732	1	0.999
Rps13	Rpl18	5034698	5031793	10090.ENSMUSP00000126294	10090.ENSMUSP00000103365	0	0	0	0	0.872	0.883	1	0.9	1	0.592	1	0.999
Rpl14	Rps9	5035620	5015940	10090.ENSMUSP00000131489	10090.ENSMUSP00000006496	0.107	0	0	0	0.908	0.855	1	0.9	1	0.559	1	0.999
Rpl10a	Rpl19	5023403	5016512	10090.ENSMUSP00000048469	10090.ENSMUSP00000017548	0	0	0	0	0.97	0.971	1	0.9	1	0.63	1	0.999
Ndufa13	Ndufs8	5032274	5027191	10090.ENSMUSP00000105796	10090.ENSMUSP00000074600	0	0	0	0	0.863	0.945	1	0.9	1	0.417	1	0.999
Rpl22	Rps23	5034020	5024346	10090.ENSMUSP00000118787	10090.ENSMUSP00000054490	0	0	0	0	0.828	0.971	1	0.9	1	0.661	1	0.999
Rpl22	Rpl36a	5034020	5032811	10090.ENSMUSP00000118787	10090.ENSMUSP00000108837	0	0	0	0	0.865	0.958	1	0.72	1	0.54	1	0.999
Rpl14	Rps11	5035620	5015656	10090.ENSMUSP00000131489	10090.ENSMUSP00000003521	0.153	0	0	0	0.918	0.859	1	0.9	1	0.693	1	0.999
Rps16	Rpl19	5031918	5016512	10090.ENSMUSP00000103940	10090.ENSMUSP00000017548	0	0	0	0	0.961	0.971	1	0	0	0.694	1	0.999
Rps24	Rpl7	5034648	5026693	10090.ENSMUSP00000125977	10090.ENSMUSP00000071616	0	0	0	0	0.999	0.797	1	0	0	0.71	1	0.999
Rplp2	Rpl19	5028293	5016512	10090.ENSMUSP00000081474	10090.ENSMUSP00000017548	0	0	0	0	0.879	0.861	1	0.9	1	0.656	1	0.999
Cox6c	Cox5a	5016303	5015244	10090.ENSMUSP00000014457	10090.ENSMUSP00000000090	0	0	0	0	0.86	0.798	1	0.9	1	0.804	1	0.999
Psmd14	Psmc1	5019035	5017247	10090.ENSMUSP00000028278	10090.ENSMUSP00000021595	0	0	0	0	0.847	0.972	1	0.9	1	0.779	1	0.999
Rplp2	Rpl37a	5028293	5025033	10090.ENSMUSP00000081474	10090.ENSMUSP00000058919	0	0	0	0	0.958	0.858	1	0.9	1	0.423	1	0.999
Rps23	Rps18	5024346	5016094	10090.ENSMUSP00000054490	10090.ENSMUSP00000008812	0.139	0	0	0	0.805	0.95	1	0.9	1	0.502	1	0.999
Rps20	Rpl30	5034139	5032315	10090.ENSMUSP00000120528	10090.ENSMUSP00000106014	0.171	0	0	0	0.931	0.971	1	0	0	0.779	1	0.999
Rpl11	Rpl37a	5030979	5025033	10090.ENSMUSP00000099595	10090.ENSMUSP00000058919	0	0	0	0	0.858	0.95	1	0.9	1	0.487	1	0.999
Rps13	Rps17	5034698	5028013	10090.ENSMUSP00000126294	10090.ENSMUSP00000079628	0	0	0	0	0.875	0.972	1	0.72	1	0.795	1	0.999
Rpl14	Rpl8	5035620	5015714	10090.ENSMUSP00000131489	10090.ENSMUSP00000004072	0.107	0	0	0	0.892	0.859	1	0.9	1	0.732	1	0.999
Rpl35a	Rps16	5033146	5031918	10090.ENSMUSP00000110731	10090.ENSMUSP00000103940	0	0	0	0	0.999	0.971	1	0	0	0.414	1	0.999
Ndufab1	Ndufs2	5020457	5016267	10090.ENSMUSP00000033157	10090.ENSMUSP00000013737	0	0	0	0	0.389	0.97	1	0.9	1	0.614	1	0.999
Rpl19	Rps11	5016512	5015656	10090.ENSMUSP00000017548	10090.ENSMUSP00000003521	0.193	0	0	0	0.972	0.972	1	0.9	1	0.735	1	0.999
Rps10	Rps26	5033114	5018537	10090.ENSMUSP00000110532	10090.ENSMUSP00000026420	0	0	0	0	0.855	0.945	1	0.72	1	0.854	1	0.999
Rpl35a	Rpl11	5033146	5030979	10090.ENSMUSP00000110731	10090.ENSMUSP00000099595	0	0	0	0	0.839	0.95	1	0.9	1	0.859	1	0.999
Rps13	Rpl36	5034698	5027972	10090.ENSMUSP00000126294	10090.ENSMUSP00000079340	0	0	0	0	0.729	0.95	1	0.9	1	0.541	1	0.999
Ndufa9	Ndufs1	5028727	5018711	10090.ENSMUSP00000085523	10090.ENSMUSP00000027111	0	0	0.205	0	0.819	0.96	1	0.9	1	0.67	1	0.999
Rpl38	Rps3a1	5031605	5019462	10090.ENSMUSP00000102213	10090.ENSMUSP00000029722	0	0	0	0	0.897	0.896	1	0.9	1	0.69	1	0.999
Rps28	Rps23	5033019	5024346	10090.ENSMUSP00000110013	10090.ENSMUSP00000054490	0	0	0	0	0.912	0.958	1	0.9	1	0.695	1	0.999
Psmd8	Psmc5	5023901	5017086	10090.ENSMUSP00000051657	10090.ENSMUSP00000021049	0	0	0	0	0.7	0.896	1	0.9	1	0.747	1	0.999
Ndufs2	Ndufs3	5016267	5015856	10090.ENSMUSP00000013737	10090.ENSMUSP00000005647	0.193	0	0.445	0	0.898	0.97	1	0.9	1	0.878	1	0.999
Rps21	Rpl19	5024953	5016512	10090.ENSMUSP00000058432	10090.ENSMUSP00000017548	0	0	0	0	0.948	0.894	1	0.9	1	0.272	1	0.999
Rpl5	Rps11	5028222	5015656	10090.ENSMUSP00000080854	10090.ENSMUSP00000003521	0.193	0	0	0	0.999	0.865	1	0	0	0.632	1	0.999
Rps27	Rps11	5035720	5015656	10090.ENSMUSP00000132102	10090.ENSMUSP00000003521	0	0	0	0	0.874	0.958	1	0.9	1	0.542	1	0.999
Rpl22	Rpl35a	5034020	5033146	10090.ENSMUSP00000118787	10090.ENSMUSP00000110731	0	0	0	0	0.914	0.971	1	0.9	1	0.502	1	0.999
Rps13	Rpl3	5034698	5028126	10090.ENSMUSP00000126294	10090.ENSMUSP00000080354	0	0	0	0	0.999	0.857	1	0.9	1	0.45	1	0.999
Rplp2	Rpl26	5028293	5026969	10090.ENSMUSP00000081474	10090.ENSMUSP00000073175	0	0	0	0	0.897	0.851	1	0.9	1	0.568	1	0.999
Rpl30	Rps9	5032315	5015940	10090.ENSMUSP00000106014	10090.ENSMUSP00000006496	0	0	0	0	0.921	0.971	1	0.9	1	0.723	1	0.999
Rpl23	Rpl27	5030904	5029225	10090.ENSMUSP00000099435	10090.ENSMUSP00000090305	0.153	0	0	0	0.873	0.958	1	0.72	1	0.394	1	0.999
Rpl14	Rpl37	5035620	5023036	10090.ENSMUSP00000131489	10090.ENSMUSP00000046506	0.044	0	0	0	0.829	0.889	1	0.9	1	0.619	1	0.999
Rps19	Rps8	5031943	5031065	10090.ENSMUSP00000104067	10090.ENSMUSP00000099757	0	0	0	0	0.966	0.896	1	0.9	1	0.766	1	0.999
Rpl36a	Rpl19	5032811	5016512	10090.ENSMUSP00000108837	10090.ENSMUSP00000017548	0	0	0	0	0.943	0.958	1	0.72	1	0.481	1	0.999
Rpl10a	Rps9	5023403	5015940	10090.ENSMUSP00000048469	10090.ENSMUSP00000006496	0.164	0	0	0	0.84	0.971	1	0.9	1	0.305	1	0.999
Rps6	Rpl36	5031125	5027972	10090.ENSMUSP00000099878	10090.ENSMUSP00000079340	0	0	0	0	0.769	0.95	1	0.9	1	0.357	1	0.999
Rps16	Rps3a1	5031918	5019462	10090.ENSMUSP00000103940	10090.ENSMUSP00000029722	0	0	0	0	0.941	0.971	1	0.72	1	0.443	1	0.999
Rps6	Rpl23	5031125	5030904	10090.ENSMUSP00000099878	10090.ENSMUSP00000099435	0	0	0	0	0.999	0.971	1	0.9	1	0.226	1	0.999
Rpl10a	Rpl37	5023403	5023036	10090.ENSMUSP00000048469	10090.ENSMUSP00000046506	0	0	0	0	0.824	0.971	1	0.9	1	0.592	1	0.999
Rpl18	Rps18	5031793	5016094	10090.ENSMUSP00000103365	10090.ENSMUSP00000008812	0.17	0	0	0	0.825	0.95	1	0.9	1	0.469	1	0.999
Rpl30	Rpl11	5032315	5030979	10090.ENSMUSP00000106014	10090.ENSMUSP00000099595	0	0	0	0	0.809	0.95	1	0.9	1	0.697	1	0.999
Rps25	Rpl19	5027947	5016512	10090.ENSMUSP00000079180	10090.ENSMUSP00000017548	0	0	0	0	0.954	0.971	1	0.9	1	0.737	1	0.999
Ndufab1	Ndufs4	5020457	5017465	10090.ENSMUSP00000033157	10090.ENSMUSP00000022286	0	0	0	0	0.824	0.97	1	0.9	1	0.445	1	0.999
Rpl39	Rpl27	5033187	5029225	10090.ENSMUSP00000110886	10090.ENSMUSP00000090305	0	0	0	0	0.834	0.958	1	0.72	1	0.638	1	0.999
Rpl35a	Rps3	5033146	5020408	10090.ENSMUSP00000110731	10090.ENSMUSP00000032998	0	0	0	0	0.981	0.97	1	0.9	1	0.466	1	0.999
Rpl30	Rps3a1	5032315	5019462	10090.ENSMUSP00000106014	10090.ENSMUSP00000029722	0	0	0	0	0.941	0.971	1	0.9	1	0.733	1	0.999
Ndufa9	Ndufs3	5028727	5015856	10090.ENSMUSP00000085523	10090.ENSMUSP00000005647	0.106	0	0	0	0.945	0.96	1	0.9	1	0.85	1	0.999
Rps23	Rpl37	5024346	5023036	10090.ENSMUSP00000054490	10090.ENSMUSP00000046506	0	0	0	0	0.836	0.972	1	0.9	1	0.512	1	0.999
Rpl22	Rpl37a	5034020	5025033	10090.ENSMUSP00000118787	10090.ENSMUSP00000058919	0	0	0	0	0.919	0.97	1	0.9	1	0.376	1	0.999
Psmc1	Psmd3	5017247	5016500	10090.ENSMUSP00000021595	10090.ENSMUSP00000017365	0	0	0	0	0.813	0.896	1	0.9	1	0.724	1	0.999
Rps23	Rps26	5024346	5018537	10090.ENSMUSP00000054490	10090.ENSMUSP00000026420	0	0	0	0	0.861	0.958	1	0.72	1	0.625	1	0.999
Cyc1	Cox5a	5017751	5015244	10090.ENSMUSP00000023210	10090.ENSMUSP00000000090	0	0	0	0	0.875	0.796	1	0.9	1	0.756	1	0.999
Rps7	Rps11	5027079	5015656	10090.ENSMUSP00000073880	10090.ENSMUSP00000003521	0	0	0	0	0.924	0.95	1	0.9	1	0.246	1	0.999
Rpl26	Rps9	5026969	5015940	10090.ENSMUSP00000073175	10090.ENSMUSP00000006496	0.164	0	0	0	0.904	0.971	1	0.9	1	0.725	1	0.999
Rpl38	Rps27a	5031605	5031143	10090.ENSMUSP00000102213	10090.ENSMUSP00000099909	0	0	0	0	0.948	0.896	1	0.9	1	0.152	1	0.999
Rps19	Rps3a1	5031943	5019462	10090.ENSMUSP00000104067	10090.ENSMUSP00000029722	0	0	0	0	0.951	0.896	1	0.9	1	0.661	1	0.999
Rps13	Rps28	5034698	5033019	10090.ENSMUSP00000126294	10090.ENSMUSP00000110013	0	0	0	0	0.806	0.958	1	0.9	1	0.522	1	0.999
Rpl30	Rpl27-ps3	5032315	5029953	10090.ENSMUSP00000106014	10090.ENSMUSP00000095287	0	0	0	0	0.813	0.958	1	0.72	1	0.731	1	0.999
Rpl14	Rps6	5035620	5031125	10090.ENSMUSP00000131489	10090.ENSMUSP00000099878	0	0	0	0	0.879	0.82	1	0.9	1	0.627	1	0.999
Rpl11	Rps3a1	5030979	5019462	10090.ENSMUSP00000099595	10090.ENSMUSP00000029722	0	0	0	0	0.813	0.95	1	0.9	1	0.651	1	0.999
Rpl3	Rpl19	5028126	5016512	10090.ENSMUSP00000080354	10090.ENSMUSP00000017548	0.17	0	0.287	0	0.941	0.851	1	0.9	1	0.716	1	0.999
Rpl14	Rps14	5035620	5018277	10090.ENSMUSP00000131489	10090.ENSMUSP00000025511	0.107	0	0	0	0.881	0.869	1	0.9	1	0.68	1	0.999
Rpl11	Rpl37	5030979	5023036	10090.ENSMUSP00000099595	10090.ENSMUSP00000046506	0	0	0	0	0.739	0.95	1	0.9	1	0.563	1	0.999
Rps13	Rps19	5034698	5031943	10090.ENSMUSP00000126294	10090.ENSMUSP00000104067	0	0	0	0	0.912	0.896	1	0.9	1	0.714	1	0.999
Ndufab1	Ndufs1	5020457	5018711	10090.ENSMUSP00000033157	10090.ENSMUSP00000027111	0	0	0	0	0.306	0.97	1	0.9	1	0.602	1	0.999
Rpl26	Rpl8	5026969	5015714	10090.ENSMUSP00000073175	10090.ENSMUSP00000004072	0.164	0	0.275	0	0.939	0.971	1	0.9	1	0.626	1	0.999
Psmd1	Psmc1	5018807	5017247	10090.ENSMUSP00000027432	10090.ENSMUSP00000021595	0	0	0	0	0.831	0.82	1	0.9	1	0.811	1	0.999
Rpl39	Rpl7	5033187	5026693	10090.ENSMUSP00000110886	10090.ENSMUSP00000071616	0	0	0	0	0.826	0.954	1	0.72	1	0.683	1	0.999
Rps24	Rps21	5034648	5024953	10090.ENSMUSP00000125977	10090.ENSMUSP00000058432	0	0	0	0	0.922	0.889	1	0.72	1	0.765	1	0.999
Rpl15	Rpl37	5027943	5023036	10090.ENSMUSP00000079163	10090.ENSMUSP00000046506	0	0	0	0	0.798	0.958	1	0.72	1	0.648	1	0.999
Rps17	Rps7	5028013	5027079	10090.ENSMUSP00000079628	10090.ENSMUSP00000073880	0	0	0	0	0.907	0.95	1	0.72	1	0.626	1	0.999
Rpl36al	Rpl19	5032361	5016512	10090.ENSMUSP00000106249	10090.ENSMUSP00000017548	0	0	0	0	0.862	0.958	1	0.72	1	0.481	1	0.999
Psmc2	Psmd12	5019763	5017092	10090.ENSMUSP00000030769	10090.ENSMUSP00000021063	0	0	0	0	0.923	0.882	1	0.9	1	0.847	1	0.999
Ndufb10	Ndufa10	5022532	5018820	10090.ENSMUSP00000043543	10090.ENSMUSP00000027478	0	0	0	0	0.806	0.884	1	0.9	1	0.817	1	0.999
Psmd1	Psmc6	5018807	5017492	10090.ENSMUSP00000027432	10090.ENSMUSP00000022380	0	0	0	0	0.804	0.82	1	0.9	1	0.846	1	0.999
Ndufa9	Ndufs8	5028727	5027191	10090.ENSMUSP00000085523	10090.ENSMUSP00000074600	0.05	0	0	0	0.761	0.945	1	0.9	1	0.603	1	0.999
Rps24	Rpl23	5034648	5030904	10090.ENSMUSP00000125977	10090.ENSMUSP00000099435	0	0	0	0	0.999	0.97	1	0	0	0.43	1	0.999
Ndufa13	Ndufab1	5032274	5020457	10090.ENSMUSP00000105796	10090.ENSMUSP00000033157	0	0	0	0	0.761	0.956	1	0.9	1	0.397	1	0.999
Ndufa12	Ndufb9	5036277	5017677	10090.ENSMUSP00000136313	10090.ENSMUSP00000022980	0	0	0	0	0.826	0.948	1	0.9	1	0.558	1	0.999
Rps19	Rpl23	5031943	5030904	10090.ENSMUSP00000104067	10090.ENSMUSP00000099435	0	0	0	0	0.999	0.896	1	0.9	1	0.515	1	0.999
Rps24	Rpl26	5034648	5026969	10090.ENSMUSP00000125977	10090.ENSMUSP00000073175	0	0	0	0	0.986	0.97	1	0	0	0.87	1	0.999
Rps15a	Rps28	5034103	5033019	10090.ENSMUSP00000119975	10090.ENSMUSP00000110013	0	0	0	0	0.857	0.958	1	0.9	1	0.712	1	0.999
Rpl18	Rpl26	5031793	5026969	10090.ENSMUSP00000103365	10090.ENSMUSP00000073175	0	0	0	0	0.937	0.97	1	0.9	1	0.586	1	0.999
Psmc2	Psmd3	5019763	5016500	10090.ENSMUSP00000030769	10090.ENSMUSP00000017365	0	0	0	0	0.803	0.89	1	0.9	1	0.765	1	0.999
Rpl36	Rps23	5027972	5024346	10090.ENSMUSP00000079340	10090.ENSMUSP00000054490	0	0	0	0	0.861	0.95	1	0.9	1	0.425	1	0.999
Rpl11	Rpl26	5030979	5026969	10090.ENSMUSP00000099595	10090.ENSMUSP00000073175	0.139	0	0	0	0.826	0.95	1	0.9	1	0.855	1	0.999
Rps13	Rps7	5034698	5027079	10090.ENSMUSP00000126294	10090.ENSMUSP00000073880	0	0	0	0	0.784	0.95	1	0.9	1	0.329	1	0.999
Rps19	Rps27a	5031943	5031143	10090.ENSMUSP00000104067	10090.ENSMUSP00000099909	0	0	0	0	0.88	0.896	1	0.9	1	0.407	1	0.999
Rpl27	Rpl19	5029225	5016512	10090.ENSMUSP00000090305	10090.ENSMUSP00000017548	0.145	0	0	0	0.93	0.958	1	0.72	1	0.47	1	0.999
Rps27	Rps8	5035720	5031065	10090.ENSMUSP00000132102	10090.ENSMUSP00000099757	0	0	0	0	0.84	0.958	1	0.9	1	0.745	1	0.999
Psmd6	Psmd12	5017456	5017092	10090.ENSMUSP00000022256	10090.ENSMUSP00000021063	0	0	0	0	0.945	0.812	1	0.9	1	0.879	1	0.999
Rpl22	Rpl30	5034020	5032315	10090.ENSMUSP00000118787	10090.ENSMUSP00000106014	0	0	0	0	0.922	0.971	1	0.9	1	0.775	1	0.999
Rpl39	Rpl26	5033187	5026969	10090.ENSMUSP00000110886	10090.ENSMUSP00000073175	0.043	0	0	0	0.936	0.97	1	0.72	1	0.68	1	0.999
Rpl3	Rps5	5028126	5015759	10090.ENSMUSP00000080354	10090.ENSMUSP00000004554	0.139	0	0	0	0.999	0.847	1	0.9	1	0.681	1	0.999
Rpl37	Rps3a1	5023036	5019462	10090.ENSMUSP00000046506	10090.ENSMUSP00000029722	0	0	0	0	0.823	0.971	1	0.9	1	0.245	1	0.999
Rps28	Rpl23	5033019	5030904	10090.ENSMUSP00000110013	10090.ENSMUSP00000099435	0	0	0	0	0.907	0.958	1	0.9	1	0.14	1	0.999
Ndufv1	Ndufs4	5022440	5017465	10090.ENSMUSP00000042967	10090.ENSMUSP00000022286	0	0	0	0	0.614	0.96	1	0.9	1	0.788	1	0.999
Rps27a	Rpl8	5031143	5015714	10090.ENSMUSP00000099909	10090.ENSMUSP00000004072	0	0	0	0	0.941	0.896	1	0.9	1	0.276	1	0.999
Rpl23	Rps14	5030904	5018277	10090.ENSMUSP00000099435	10090.ENSMUSP00000025511	0.172	0	0.361	0	0.999	0.97	1	0.9	1	0.401	1	0.999
Serpinc1	F2	5026337	5019138	10090.ENSMUSP00000068971	10090.ENSMUSP00000028681	0	0	0	0	0.786	0.742	1	0.9	1	0.949	1	0.999
Psmc4	Psmd3	5020351	5016500	10090.ENSMUSP00000032824	10090.ENSMUSP00000017365	0	0	0	0	0.817	0.896	1	0.9	1	0.825	1	0.999
Rps19	Rps21	5031943	5024953	10090.ENSMUSP00000104067	10090.ENSMUSP00000058432	0	0	0	0	0.939	0.896	1	0.9	1	0.556	1	0.999
Rps7	Rps23	5027079	5024346	10090.ENSMUSP00000073880	10090.ENSMUSP00000054490	0	0	0	0	0.84	0.95	1	0.9	1	0.321	1	0.999
Ndufs7	Ndufa6	5031381	5017711	10090.ENSMUSP00000101003	10090.ENSMUSP00000023085	0	0	0	0	0.81	0.971	1	0.9	1	0.593	1	0.999
Rps13	Rpl32	5034698	5028158	10090.ENSMUSP00000126294	10090.ENSMUSP00000080523	0	0	0	0	0.875	0.971	1	0.9	1	0.311	1	0.999
Rpl37a	Rps18	5025033	5016094	10090.ENSMUSP00000058919	10090.ENSMUSP00000008812	0	0	0	0	0.852	0.95	1	0.9	1	0.325	1	0.999
Rpl11	Rpl5	5030979	5028222	10090.ENSMUSP00000099595	10090.ENSMUSP00000080854	0.17	0	0	0	0.808	0.764	1	0.72	1	0.948	1	0.999
Rpl30	Rps18	5032315	5016094	10090.ENSMUSP00000106014	10090.ENSMUSP00000008812	0	0	0	0	0.805	0.95	1	0.9	1	0.538	1	0.999
Uba52	Rpl26	5034113	5026969	10090.ENSMUSP00000120096	10090.ENSMUSP00000073175	0	0	0	0	0.71	0.945	1	0.9	1	0.576	1	0.999
Psmd14	Psmd1	5019035	5018807	10090.ENSMUSP00000028278	10090.ENSMUSP00000027432	0	0	0	0	0.844	0.82	1	0.9	1	0.85	1	0.999
Ndufv1	Cyc1	5022440	5017751	10090.ENSMUSP00000042967	10090.ENSMUSP00000023210	0	0	0	0	0.93	0.664	1	0.9	1	0.641	1	0.999
Rps10	Rps29	5033114	5021660	10090.ENSMUSP00000110532	10090.ENSMUSP00000038352	0	0	0	0	0.792	0.958	1	0.72	1	0.725	1	0.999
Rpl30	Rps17	5032315	5028013	10090.ENSMUSP00000106014	10090.ENSMUSP00000079628	0	0	0	0	0.899	0.971	1	0	0	0.733	1	0.999
Rpl22	Rps28	5034020	5033019	10090.ENSMUSP00000118787	10090.ENSMUSP00000110013	0	0	0	0	0.799	0.958	1	0.9	1	0.485	1	0.999
Rpl36a	Rpl26	5032811	5026969	10090.ENSMUSP00000108837	10090.ENSMUSP00000073175	0	0	0	0	0.938	0.958	1	0.72	1	0.622	1	0.999
Rps25	Rps11	5027947	5015656	10090.ENSMUSP00000079180	10090.ENSMUSP00000003521	0	0	0	0	0.999	0.971	1	0.9	1	0.565	1	0.999
Rps28	Rps3a1	5033019	5019462	10090.ENSMUSP00000110013	10090.ENSMUSP00000029722	0	0	0	0	0.846	0.958	1	0.9	1	0.595	1	0.999
Rps14	Rps11	5018277	5015656	10090.ENSMUSP00000025511	10090.ENSMUSP00000003521	0.172	0	0.232	0	0.999	0.97	1	0.9	1	0.764	1	0.999
Rps27	Rpl8	5035720	5015714	10090.ENSMUSP00000132102	10090.ENSMUSP00000004072	0	0	0	0	0.834	0.958	1	0.9	1	0.36	1	0.999
Rpl22	Rpl37	5034020	5023036	10090.ENSMUSP00000118787	10090.ENSMUSP00000046506	0	0	0	0	0.817	0.971	1	0.9	1	0.572	1	0.999
Rps10	Rps16	5033114	5031918	10090.ENSMUSP00000110532	10090.ENSMUSP00000103940	0	0	0	0	0.811	0.958	1	0.72	1	0.696	1	0.999
Rps16	Rps26	5031918	5018537	10090.ENSMUSP00000103940	10090.ENSMUSP00000026420	0	0	0	0	0.862	0.958	1	0.72	1	0.51	1	0.999
Rpl23	Rpl10	5030904	5016095	10090.ENSMUSP00000099435	10090.ENSMUSP00000008826	0.139	0	0	0	0.882	0.958	1	0.72	1	0.31	1	0.999
Rplp2	Rps14	5028293	5018277	10090.ENSMUSP00000081474	10090.ENSMUSP00000025511	0	0	0	0	0.906	0.856	1	0.9	1	0.689	1	0.999
Rps28	Rps25	5033019	5027947	10090.ENSMUSP00000110013	10090.ENSMUSP00000079180	0	0	0	0	0.868	0.958	1	0.9	1	0.625	1	0.999
Rpl14	Rpl18	5035620	5031793	10090.ENSMUSP00000131489	10090.ENSMUSP00000103365	0	0	0	0	0.901	0.825	1	0.9	1	0.662	1	0.999
Rpl19	Rpl10	5016512	5016095	10090.ENSMUSP00000017548	10090.ENSMUSP00000008826	0	0	0	0	0.912	0.958	1	0.72	1	0.388	1	0.999
Rps29	Rps9	5021660	5015940	10090.ENSMUSP00000038352	10090.ENSMUSP00000006496	0.139	0	0	0	0.816	0.971	1	0.72	1	0.523	1	0.999
Psmd8	Psmd14	5023901	5019035	10090.ENSMUSP00000051657	10090.ENSMUSP00000028278	0	0	0	0	0.719	0.896	1	0.9	1	0.799	1	0.999
Rpl38	Rps25	5031605	5027947	10090.ENSMUSP00000102213	10090.ENSMUSP00000079180	0	0	0	0	0.938	0.896	1	0.9	1	0.841	1	0.999
Rps24	Rps28	5034648	5033019	10090.ENSMUSP00000125977	10090.ENSMUSP00000110013	0.044	0	0	0	0.825	0.958	1	0.72	1	0.782	1	0.999
Rpl38	Rpl34	5031605	5028844	10090.ENSMUSP00000102213	10090.ENSMUSP00000086614	0	0	0	0	0.926	0.801	1	0.9	1	0.516	1	0.999
Rpl38	Rps3	5031605	5020408	10090.ENSMUSP00000102213	10090.ENSMUSP00000032998	0	0	0	0	0.883	0.896	1	0.9	1	0.578	1	0.999
Ndufa9	Ndufb8	5028727	5018490	10090.ENSMUSP00000085523	10090.ENSMUSP00000026222	0	0	0	0	0.78	0.958	1	0.9	1	0.762	1	0.999
Rpl32	Rps3a1	5028158	5019462	10090.ENSMUSP00000080523	10090.ENSMUSP00000029722	0	0	0	0	0.909	0.971	1	0.9	1	0.427	1	0.999
Rps8	Rps29	5031065	5021660	10090.ENSMUSP00000099757	10090.ENSMUSP00000038352	0	0	0	0	0.913	0.96	1	0.72	1	0.656	1	0.999
Rpl18	Rps21	5031793	5024953	10090.ENSMUSP00000103365	10090.ENSMUSP00000058432	0	0	0	0	0.912	0.864	1	0.9	1	0.483	1	0.999
Rpl37a	Rps14	5025033	5018277	10090.ENSMUSP00000058919	10090.ENSMUSP00000025511	0	0	0.218	0	0.957	0.97	1	0.9	1	0.545	1	0.999
Psmd7	Psmd13	5022298	5018587	10090.ENSMUSP00000041968	10090.ENSMUSP00000026560	0	0	0	0	0.808	0.801	1	0.9	1	0.819	1	0.999
Rpl35a	Rplp2	5033146	5028293	10090.ENSMUSP00000110731	10090.ENSMUSP00000081474	0	0	0	0	0.916	0.866	1	0.9	1	0.559	1	0.999
Rpl30	Rpl7	5032315	5026693	10090.ENSMUSP00000106014	10090.ENSMUSP00000071616	0	0	0	0	0.936	0.962	1	0.72	1	0.664	1	0.999
Rpl4	Rps9	5021039	5015940	10090.ENSMUSP00000034966	10090.ENSMUSP00000006496	0.139	0	0	0	0.898	0.82	1	0.9	1	0.527	1	0.999
Rps18	Rps11	5016094	5015656	10090.ENSMUSP00000008812	10090.ENSMUSP00000003521	0.17	0	0	0	0.834	0.95	1	0.9	1	0.679	1	0.999
Rpl36	Rpl26	5027972	5026969	10090.ENSMUSP00000079340	10090.ENSMUSP00000073175	0	0	0	0	0.916	0.95	1	0.9	1	0.58	1	0.999
Rps2	Rps11	5029538	5015656	10090.ENSMUSP00000092502	10090.ENSMUSP00000003521	0.127	0	0	0	0.772	0.939	1	0.9	1	0.459	1	0.999
Rpl36	Rps5	5027972	5015759	10090.ENSMUSP00000079340	10090.ENSMUSP00000004554	0	0	0	0	0.889	0.95	1	0.9	1	0.521	1	0.999
Ndufa12	Ndufab1	5036277	5020457	10090.ENSMUSP00000136313	10090.ENSMUSP00000033157	0	0	0	0	0.818	0.957	1	0.9	1	0.234	1	0.999
Rpl11	Rps14	5030979	5018277	10090.ENSMUSP00000099595	10090.ENSMUSP00000025511	0.139	0	0.202	0	0.848	0.95	1	0.9	1	0.854	1	0.999
Rpl22	Rpl5	5034020	5028222	10090.ENSMUSP00000118787	10090.ENSMUSP00000080854	0	0	0	0	0.876	0.852	1	0.72	1	0.861	1	0.999
Rps18	Rps9	5016094	5015940	10090.ENSMUSP00000008812	10090.ENSMUSP00000006496	0.139	0	0	0	0.768	0.95	1	0.9	1	0.608	1	0.999
Ndufa8	Ndufv1	5025925	5022440	10090.ENSMUSP00000065352	10090.ENSMUSP00000042967	0	0	0	0	0.784	0.959	1	0.9	1	0.5	1	0.999
Rpl31	Rpl10a	5036727	5023403	10090.ENSMUSP00000137631	10090.ENSMUSP00000048469	0.172	0	0	0	0.912	0.97	1	0.72	1	0.699	1	0.999
Rpl27-ps3	Rpl26	5029953	5026969	10090.ENSMUSP00000095287	10090.ENSMUSP00000073175	0.107	0	0	0	0.809	0.958	1	0.72	1	0.709	1	0.999
Rpl26	Rpl7	5026969	5026693	10090.ENSMUSP00000073175	10090.ENSMUSP00000071616	0.119	0	0	0	0.999	0.957	1	0.72	1	0.761	1	0.999
Ndufa9	Ndufs2	5028727	5016267	10090.ENSMUSP00000085523	10090.ENSMUSP00000013737	0	0	0	0	0.886	0.953	1	0.9	1	0.669	1	0.999
Rps17	Rps9	5028013	5015940	10090.ENSMUSP00000079628	10090.ENSMUSP00000006496	0	0	0	0	0.889	0.972	1	0.72	1	0.64	1	0.999
Ndufv2	Ndufa10	5034213	5018820	10090.ENSMUSP00000121557	10090.ENSMUSP00000027478	0	0	0	0	0.608	0.959	1	0.9	1	0.49	1	0.999
Rps27	Rpl23	5035720	5030904	10090.ENSMUSP00000132102	10090.ENSMUSP00000099435	0	0	0	0	0.841	0.958	1	0.9	1	0.358	1	0.999
Psmc2	Psmc6	5019763	5017492	10090.ENSMUSP00000030769	10090.ENSMUSP00000022380	0	0	0.324	0.917	0.914	0.971	1	0.9	1	0.863	1	0.999
Rps13	Rps3a1	5034698	5019462	10090.ENSMUSP00000126294	10090.ENSMUSP00000029722	0.172	0	0	0	0.913	0.971	1	0.9	1	0.766	1	0.999
Rps13	Rpl4	5034698	5021039	10090.ENSMUSP00000126294	10090.ENSMUSP00000034966	0	0	0	0	0.9	0.821	1	0.9	1	0.719	1	0.999
Rps23	Rps11	5024346	5015656	10090.ENSMUSP00000054490	10090.ENSMUSP00000003521	0.172	0	0	0	0.928	0.972	1	0.9	1	0.485	1	0.999
Rpl5	Rpl4	5028222	5021039	10090.ENSMUSP00000080854	10090.ENSMUSP00000034966	0.17	0	0	0	0.922	0.817	1	0.72	1	0.774	1	0.999
Rpl6	Rpl8	5020043	5015714	10090.ENSMUSP00000031617	10090.ENSMUSP00000004072	0.107	0	0	0	0.951	0.799	1	0.9	1	0.714	1	0.999
Rpl3	Rpl26	5028126	5026969	10090.ENSMUSP00000080354	10090.ENSMUSP00000073175	0.139	0	0.25	0	0.925	0.856	1	0.9	1	0.755	1	0.999
Rps28	Rpl19	5033019	5016512	10090.ENSMUSP00000110013	10090.ENSMUSP00000017548	0	0	0	0	0.933	0.958	1	0.9	1	0.502	1	0.999
Rpl31	Rpl30	5036727	5032315	10090.ENSMUSP00000137631	10090.ENSMUSP00000106014	0	0	0	0	0.927	0.97	1	0.72	1	0.701	1	0.999
Rps20	Rps15a	5034139	5034103	10090.ENSMUSP00000120528	10090.ENSMUSP00000119975	0.172	0	0	0	0.886	0.972	1	0.72	1	0.579	1	0.999
Rps26	Rpl8	5018537	5015714	10090.ENSMUSP00000026420	10090.ENSMUSP00000004072	0	0	0	0	0.933	0.958	1	0.72	1	0.562	1	0.999
Rps20	Rps3	5034139	5020408	10090.ENSMUSP00000120528	10090.ENSMUSP00000032998	0.172	0	0	0	0.917	0.972	1	0.72	1	0.851	1	0.999
Rps24	Rps3a1	5034648	5019462	10090.ENSMUSP00000125977	10090.ENSMUSP00000029722	0.057	0	0	0	0.999	0.889	1	0.72	1	0.699	1	0.999
Rpl18	Rps5	5031793	5015759	10090.ENSMUSP00000103365	10090.ENSMUSP00000004554	0	0	0	0	0.961	0.889	1	0.9	1	0.641	1	0.999
Rpl30	Rpl4	5032315	5021039	10090.ENSMUSP00000106014	10090.ENSMUSP00000034966	0.17	0	0	0	0.911	0.82	1	0.9	1	0.724	1	0.999
Rpl31	Rps15a	5036727	5034103	10090.ENSMUSP00000137631	10090.ENSMUSP00000119975	0	0	0	0	0.917	0.971	1	0	0	0.62	1	0.999
Rps13	Rpl26	5034698	5026969	10090.ENSMUSP00000126294	10090.ENSMUSP00000073175	0	0	0.3	0	0.907	0.971	1	0.9	1	0.541	1	0.999
Rps25	Rpl26	5027947	5026969	10090.ENSMUSP00000079180	10090.ENSMUSP00000073175	0	0	0	0	0.964	0.971	1	0.9	1	0.806	1	0.999
Ndufs8	Ndufab1	5027191	5020457	10090.ENSMUSP00000074600	10090.ENSMUSP00000033157	0.187	0	0	0	0.485	0.97	1	0.9	1	0.705	1	0.999
Rpl10a	Rps26	5023403	5018537	10090.ENSMUSP00000048469	10090.ENSMUSP00000026420	0	0	0	0	0.943	0.958	1	0.72	1	0.475	1	0.999
Ndufs8	Ndufs1	5027191	5018711	10090.ENSMUSP00000074600	10090.ENSMUSP00000027111	0.193	0	0.405	0	0.642	0.959	1	0.9	1	0.875	1	0.999
Ndufv2	Ndufs3	5034213	5015856	10090.ENSMUSP00000121557	10090.ENSMUSP00000005647	0.193	0	0.305	0	0.883	0.967	1	0.9	1	0.803	1	0.999
Rps24	Rps26	5034648	5018537	10090.ENSMUSP00000125977	10090.ENSMUSP00000026420	0	0	0	0	0.861	0.958	1	0.72	1	0.877	1	0.999
Rpl31	Rps29	5036727	5021660	10090.ENSMUSP00000137631	10090.ENSMUSP00000038352	0	0	0	0	0.817	0.962	1	0.72	1	0.744	1	0.999
Rps27	Rpl26	5035720	5026969	10090.ENSMUSP00000132102	10090.ENSMUSP00000073175	0	0	0	0	0.842	0.958	1	0.9	1	0.802	1	0.999
Rps7	Rps9	5027079	5015940	10090.ENSMUSP00000073880	10090.ENSMUSP00000006496	0	0	0	0	0.782	0.95	1	0.9	1	0.468	1	0.999
Rpl22	Rps6	5034020	5031125	10090.ENSMUSP00000118787	10090.ENSMUSP00000099878	0	0	0	0	0.913	0.971	1	0.9	1	0.807	1	0.999
Rps13	Rps11	5034698	5015656	10090.ENSMUSP00000126294	10090.ENSMUSP00000003521	0	0	0	0	0.999	0.972	1	0.9	1	0.766	1	0.999
Ndufs1	Ndufs3	5018711	5015856	10090.ENSMUSP00000027111	10090.ENSMUSP00000005647	0.193	0	0.401	0	0.778	0.961	1	0.9	1	0.856	1	0.999
Rps13	Rpl37a	5034698	5025033	10090.ENSMUSP00000126294	10090.ENSMUSP00000058919	0	0	0.285	0	0.872	0.97	1	0.9	1	0.283	1	0.999
Rpl31	Rpl23	5036727	5030904	10090.ENSMUSP00000137631	10090.ENSMUSP00000099435	0	0	0	0	0.933	0.971	1	0.72	1	0.454	1	0.999
Rps8	Rpl34	5031065	5028844	10090.ENSMUSP00000099757	10090.ENSMUSP00000086614	0	0	0	0	0.93	0.801	1	0.9	1	0.372	1	0.999
Rpl32	Rps25	5028158	5027947	10090.ENSMUSP00000080523	10090.ENSMUSP00000079180	0	0	0	0	0.911	0.971	1	0.9	1	0.472	1	0.999
Rpl36	Rpl10a	5027972	5023403	10090.ENSMUSP00000079340	10090.ENSMUSP00000048469	0	0	0	0	0.905	0.95	1	0.9	1	0.294	1	0.999
Psmc4	Psmc2	5020351	5019763	10090.ENSMUSP00000032824	10090.ENSMUSP00000030769	0	0	0.346	0.887	0.909	0.972	1	0.9	1	0.884	1	0.999
Rps27	Rps15a	5035720	5034103	10090.ENSMUSP00000132102	10090.ENSMUSP00000119975	0	0	0	0	0.831	0.958	1	0.9	1	0.556	1	0.999
Rpl38	Rps21	5031605	5024953	10090.ENSMUSP00000102213	10090.ENSMUSP00000058432	0	0	0	0	0.954	0.889	1	0.9	1	0.694	1	0.999
Rps16	Rps23	5031918	5024346	10090.ENSMUSP00000103940	10090.ENSMUSP00000054490	0.139	0	0	0	0.93	0.971	1	0.72	1	0.762	1	0.999
Rps16	Rps5	5031918	5015759	10090.ENSMUSP00000103940	10090.ENSMUSP00000004554	0.139	0	0	0	0.999	0.971	1	0.72	1	0.707	1	0.999
Rps21	Rpl10a	5024953	5023403	10090.ENSMUSP00000058432	10090.ENSMUSP00000048469	0	0	0	0	0.957	0.884	1	0.9	1	0.461	1	0.999
Rps21	Rps11	5024953	5015656	10090.ENSMUSP00000058432	10090.ENSMUSP00000003521	0	0	0	0	0.965	0.896	1	0.9	1	0.597	1	0.999
Rpl14	Rpl6	5035620	5020043	10090.ENSMUSP00000131489	10090.ENSMUSP00000031617	0	0	0	0	0.822	0.78	1	0.9	1	0.788	1	0.999
Rps16	Rps3	5031918	5020408	10090.ENSMUSP00000103940	10090.ENSMUSP00000032998	0.17	0	0	0	0.999	0.971	1	0.72	1	0.804	1	0.999
Rps6	Rps11	5031125	5015656	10090.ENSMUSP00000099878	10090.ENSMUSP00000003521	0	0	0	0	0.999	0.971	1	0.9	1	0.634	1	0.999
Rps25	Rps7	5027947	5027079	10090.ENSMUSP00000079180	10090.ENSMUSP00000073880	0	0	0	0	0.86	0.95	1	0.9	1	0.488	1	0.999
Rps13	Rps6	5034698	5031125	10090.ENSMUSP00000126294	10090.ENSMUSP00000099878	0.075	0	0	0	0.918	0.971	1	0.9	1	0.5	1	0.999
Rpl30	Rpl8	5032315	5015714	10090.ENSMUSP00000106014	10090.ENSMUSP00000004072	0	0	0	0	0.916	0.971	1	0.9	1	0.702	1	0.999
Rpl37a	Rps5	5025033	5015759	10090.ENSMUSP00000058919	10090.ENSMUSP00000004554	0	0	0	0	0.964	0.97	1	0.9	1	0.393	1	0.999
Rpl27	Rps11	5029225	5015656	10090.ENSMUSP00000090305	10090.ENSMUSP00000003521	0.153	0	0	0	0.938	0.958	1	0	0	0.639	1	0.999
Rpl31	Rps23	5036727	5024346	10090.ENSMUSP00000137631	10090.ENSMUSP00000054490	0	0	0	0	0.881	0.97	1	0.72	1	0.427	1	0.999
Rps6	Rpl37a	5031125	5025033	10090.ENSMUSP00000099878	10090.ENSMUSP00000058919	0	0	0	0	0.857	0.97	1	0.9	1	0.498	1	0.999
Rps20	Rps14	5034139	5018277	10090.ENSMUSP00000120528	10090.ENSMUSP00000025511	0.164	0	0	0	0.912	0.97	1	0.72	1	0.84	1	0.999
Ndufb8	Ndufb9	5018490	5017677	10090.ENSMUSP00000026222	10090.ENSMUSP00000022980	0	0	0	0	0.938	0.959	1	0.9	1	0.446	1	0.999
Rpl39	Rps29	5033187	5021660	10090.ENSMUSP00000110886	10090.ENSMUSP00000038352	0	0	0	0	0.861	0.963	1	0.72	1	0.655	1	0.999
Rps17	Rps26	5028013	5018537	10090.ENSMUSP00000079628	10090.ENSMUSP00000026420	0	0	0	0	0.951	0.958	1	0.72	1	0.844	1	0.999
Rpl36a	Rpl37a	5032811	5025033	10090.ENSMUSP00000108837	10090.ENSMUSP00000058919	0	0	0	0	0.94	0.958	1	0.72	1	0.56	1	0.999
Rps7	Rpl26	5027079	5026969	10090.ENSMUSP00000073880	10090.ENSMUSP00000073175	0	0	0	0	0.942	0.95	1	0.9	1	0.575	1	0.999
Rpl23	Rps23	5030904	5024346	10090.ENSMUSP00000099435	10090.ENSMUSP00000054490	0.172	0	0.32	0	0.938	0.971	1	0.9	1	0.364	1	0.999
Rps15a	Rpl18	5034103	5031793	10090.ENSMUSP00000119975	10090.ENSMUSP00000103365	0	0	0	0	0.903	0.97	1	0.9	1	0.593	1	0.999
Rpl3	Rps25	5028126	5027947	10090.ENSMUSP00000080354	10090.ENSMUSP00000079180	0	0	0	0	0.999	0.854	1	0.9	1	0.336	1	0.999
Rps5	Rps11	5015759	5015656	10090.ENSMUSP00000004554	10090.ENSMUSP00000003521	0.172	0	0	0	0.999	0.972	1	0.9	1	0.681	1	0.999
Rpl23	Rpl32	5030904	5028158	10090.ENSMUSP00000099435	10090.ENSMUSP00000080523	0.172	0	0	0	0.938	0.971	1	0.9	1	0.483	1	0.999
Rpl35a	Rps26	5033146	5018537	10090.ENSMUSP00000110731	10090.ENSMUSP00000026420	0	0	0	0	0.861	0.958	1	0	0	0.843	1	0.999
Rplp2	Rps21	5028293	5024953	10090.ENSMUSP00000081474	10090.ENSMUSP00000058432	0	0	0	0	0.938	0.856	1	0.9	1	0.378	1	0.999
Rps19	Rpl18	5031943	5031793	10090.ENSMUSP00000104067	10090.ENSMUSP00000103365	0	0.371	0	0	0.955	0.887	1	0.9	1	0.609	1	0.999
Rpl30	Rps6	5032315	5031125	10090.ENSMUSP00000106014	10090.ENSMUSP00000099878	0	0	0	0	0.932	0.971	1	0.9	1	0.72	1	0.999
Rps6	Rps5	5031125	5015759	10090.ENSMUSP00000099878	10090.ENSMUSP00000004554	0	0	0	0	0.941	0.971	1	0.9	1	0.491	1	0.999
Rpl31	Rps28	5036727	5033019	10090.ENSMUSP00000137631	10090.ENSMUSP00000110013	0	0	0	0	0.825	0.958	1	0.72	1	0.635	1	0.999
Rpl30	Rps21	5032315	5024953	10090.ENSMUSP00000106014	10090.ENSMUSP00000058432	0	0	0	0	0.937	0.896	1	0.9	1	0.578	1	0.999
Rpl36a	Rpl23	5032811	5030904	10090.ENSMUSP00000108837	10090.ENSMUSP00000099435	0	0	0	0	0.932	0.958	1	0.72	1	0.57	1	0.999
Psmd1	Psmd11	5018807	5016515	10090.ENSMUSP00000027432	10090.ENSMUSP00000017572	0	0	0	0	0.813	0.817	1	0.9	1	0.858	1	0.999
Rplp2	Rps11	5028293	5015656	10090.ENSMUSP00000081474	10090.ENSMUSP00000003521	0	0	0	0	0.917	0.869	1	0.9	1	0.338	1	0.999
Rpl32	Rps3	5028158	5020408	10090.ENSMUSP00000080523	10090.ENSMUSP00000032998	0.172	0	0	0	0.91	0.971	1	0.9	1	0.445	1	0.999
Rps13	Rps20	5034698	5034139	10090.ENSMUSP00000126294	10090.ENSMUSP00000120528	0	0	0	0	0.917	0.972	1	0.72	1	0.815	1	0.999
Rps26	Rps14	5018537	5018277	10090.ENSMUSP00000026420	10090.ENSMUSP00000025511	0	0	0	0	0.922	0.958	1	0.72	1	0.745	1	0.999
Psmd6	Psmc1	5017456	5017247	10090.ENSMUSP00000022256	10090.ENSMUSP00000021595	0	0	0	0	0.865	0.812	1	0.9	1	0.732	1	0.999
Ndufa12	Ndufa6	5036277	5017711	10090.ENSMUSP00000136313	10090.ENSMUSP00000023085	0	0	0	0	0.821	0.957	1	0.9	1	0.658	1	0.999
Rpl23	Rpl19	5030904	5016512	10090.ENSMUSP00000099435	10090.ENSMUSP00000017548	0.193	0	0.245	0	0.944	0.971	1	0.9	1	0.267	1	0.999
Rpl36	Rpl37a	5027972	5025033	10090.ENSMUSP00000079340	10090.ENSMUSP00000058919	0	0	0	0	0.903	0.945	1	0.9	1	0.327	1	0.999
Rps24	Rps9	5034648	5015940	10090.ENSMUSP00000125977	10090.ENSMUSP00000006496	0	0	0	0	0.836	0.97	1	0.72	1	0.633	1	0.999
Rpl38	Rpl10a	5031605	5023403	10090.ENSMUSP00000102213	10090.ENSMUSP00000048469	0	0	0	0	0.906	0.896	1	0.9	1	0.681	1	0.999
Rpl35a	Rpl37	5033146	5023036	10090.ENSMUSP00000110731	10090.ENSMUSP00000046506	0	0	0	0	0.86	0.971	1	0.9	1	0.546	1	0.999
Rps17	Rps11	5028013	5015656	10090.ENSMUSP00000079628	10090.ENSMUSP00000003521	0	0	0	0	0.963	0.972	1	0.72	1	0.705	1	0.999
Rps19	Rps7	5031943	5027079	10090.ENSMUSP00000104067	10090.ENSMUSP00000073880	0	0	0	0	0.905	0.768	1	0.9	1	0.632	1	0.999
Rps17	Rpl8	5028013	5015714	10090.ENSMUSP00000079628	10090.ENSMUSP00000004072	0.171	0	0	0	0.948	0.972	1	0	0	0.354	1	0.999
Psmd14	Psmc6	5019035	5017492	10090.ENSMUSP00000028278	10090.ENSMUSP00000022380	0	0	0	0	0.843	0.971	1	0.9	1	0.777	1	0.999
Rpl37a	Rps23	5025033	5024346	10090.ENSMUSP00000058919	10090.ENSMUSP00000054490	0	0	0	0	0.961	0.97	1	0.9	1	0.083	1	0.999
Psmd7	Psmc5	5022298	5017086	10090.ENSMUSP00000041968	10090.ENSMUSP00000021049	0	0	0	0	0.826	0.896	1	0.9	1	0.843	1	0.999
Rpl26	Rpl10a	5026969	5023403	10090.ENSMUSP00000073175	10090.ENSMUSP00000048469	0.164	0	0	0	0.959	0.97	1	0.9	1	0.616	1	0.999
Rps25	Rpl8	5027947	5015714	10090.ENSMUSP00000079180	10090.ENSMUSP00000004072	0	0	0	0	0.999	0.971	1	0.9	1	0.501	1	0.999
Rpl18	Rpl19	5031793	5016512	10090.ENSMUSP00000103365	10090.ENSMUSP00000017548	0	0	0	0	0.961	0.962	1	0.9	1	0.634	1	0.999
Rpl23	Rpl10a	5030904	5023403	10090.ENSMUSP00000099435	10090.ENSMUSP00000048469	0.172	0	0	0	0.999	0.971	1	0.9	1	0.323	1	0.999
Rps6	Rps17	5031125	5028013	10090.ENSMUSP00000099878	10090.ENSMUSP00000079628	0	0	0	0	0.91	0.971	1	0.72	1	0.721	1	0.999
Psmc4	Psmd12	5020351	5017092	10090.ENSMUSP00000032824	10090.ENSMUSP00000021063	0	0	0	0	0.826	0.896	1	0.9	1	0.809	1	0.999
Rpl32	Rpl26	5028158	5026969	10090.ENSMUSP00000080523	10090.ENSMUSP00000073175	0.164	0	0	0	0.952	0.971	1	0.9	1	0.185	1	0.999
Rps24	Rps3	5034648	5020408	10090.ENSMUSP00000125977	10090.ENSMUSP00000032998	0	0	0	0	0.873	0.97	1	0.72	1	0.673	1	0.999
Ndufa9	Ndufb10	5028727	5022532	10090.ENSMUSP00000085523	10090.ENSMUSP00000043543	0	0	0	0	0.803	0.944	1	0.9	1	0.472	1	0.999
Ndufab1	Ndufa6	5020457	5017711	10090.ENSMUSP00000033157	10090.ENSMUSP00000023085	0	0	0	0	0.813	0.971	1	0.9	1	0.534	1	0.999
Psmd13	Psmd11	5018587	5016515	10090.ENSMUSP00000026560	10090.ENSMUSP00000017572	0	0	0	0	0.796	0.798	1	0.9	1	0.843	1	0.999
Psmc6	Psmd11	5017492	5016515	10090.ENSMUSP00000022380	10090.ENSMUSP00000017572	0	0	0	0	0.797	0.896	1	0.9	1	0.792	1	0.999
Rpl38	Rpl32	5031605	5028158	10090.ENSMUSP00000102213	10090.ENSMUSP00000080523	0	0	0	0	0.936	0.896	1	0.9	1	0.44	1	0.999
Rps15a	Rps3a1	5034103	5019462	10090.ENSMUSP00000119975	10090.ENSMUSP00000029722	0	0	0	0	0.999	0.971	1	0.9	1	0.531	1	0.999
Rps7	Rpl8	5027079	5015714	10090.ENSMUSP00000073880	10090.ENSMUSP00000004072	0	0	0	0	0.946	0.95	1	0.9	1	0.429	1	0.999
Psmc4	Psmc5	5020351	5017086	10090.ENSMUSP00000032824	10090.ENSMUSP00000021049	0	0	0.383	0.91	0.887	0.972	1	0.9	1	0.856	1	0.999
Rps19	Rpl8	5031943	5015714	10090.ENSMUSP00000104067	10090.ENSMUSP00000004072	0	0	0	0	0.999	0.896	1	0.9	1	0.636	1	0.999
Rpl18	Rpl7	5031793	5026693	10090.ENSMUSP00000103365	10090.ENSMUSP00000071616	0	0	0	0	0.91	0.961	1	0.72	1	0.673	1	0.999
Ndufs8	Ndufa6	5027191	5017711	10090.ENSMUSP00000074600	10090.ENSMUSP00000023085	0	0	0	0	0.83	0.97	1	0.9	1	0.604	1	0.999
Rpl14	Rps25	5035620	5027947	10090.ENSMUSP00000131489	10090.ENSMUSP00000079180	0	0	0	0	0.886	0.873	1	0.9	1	0.629	1	0.999
Rpl14	Rps21	5035620	5024953	10090.ENSMUSP00000131489	10090.ENSMUSP00000058432	0	0	0	0	0.882	0.818	1	0.9	1	0.622	1	0.999
Ndufv2	Ndufb9	5034213	5017677	10090.ENSMUSP00000121557	10090.ENSMUSP00000022980	0	0	0	0	0.854	0.937	1	0.9	1	0.54	1	0.999
Rpl11	Rps9	5030979	5015940	10090.ENSMUSP00000099595	10090.ENSMUSP00000006496	0.139	0	0	0	0.805	0.95	1	0.9	1	0.644	1	0.999
Rpl3	Rps9	5028126	5015940	10090.ENSMUSP00000080354	10090.ENSMUSP00000006496	0.139	0	0	0	0.922	0.851	1	0.9	1	0.611	1	0.999
Rps2	Rpl8	5029538	5015714	10090.ENSMUSP00000092502	10090.ENSMUSP00000004072	0.091	0	0	0	0.89	0.939	1	0.9	1	0.511	1	0.999
Rps17	Rps23	5028013	5024346	10090.ENSMUSP00000079628	10090.ENSMUSP00000054490	0	0	0	0	0.911	0.972	1	0.72	1	0.719	1	0.999
Rpl11	Rpl10a	5030979	5023403	10090.ENSMUSP00000099595	10090.ENSMUSP00000048469	0.139	0	0	0	0.812	0.95	1	0.9	1	0.423	1	0.999
Rps25	Rps26	5027947	5018537	10090.ENSMUSP00000079180	10090.ENSMUSP00000026420	0	0	0	0	0.907	0.958	1	0.72	1	0.672	1	0.999
Rps8	Rpl36	5031065	5027972	10090.ENSMUSP00000099757	10090.ENSMUSP00000079340	0	0	0	0	0.898	0.95	1	0.9	1	0.52	1	0.999
Ndufs7	Ndufv1	5031381	5022440	10090.ENSMUSP00000101003	10090.ENSMUSP00000042967	0.193	0	0.254	0	0.94	0.954	1	0.9	1	0.848	1	0.999
Rpl4	Rps3a1	5021039	5019462	10090.ENSMUSP00000034966	10090.ENSMUSP00000029722	0	0	0	0	0.927	0.826	1	0.9	1	0.722	1	0.999
Rpl14	Rps3	5035620	5020408	10090.ENSMUSP00000131489	10090.ENSMUSP00000032998	0.153	0	0	0	0.913	0.815	1	0.9	1	0.696	1	0.999
Rpl35a	Rpl15	5033146	5027943	10090.ENSMUSP00000110731	10090.ENSMUSP00000079163	0	0	0	0	0.868	0.958	1	0.72	1	0.668	1	0.999
Ndufa8	Ndufb8	5025925	5018490	10090.ENSMUSP00000065352	10090.ENSMUSP00000026222	0	0	0	0	0.918	0.951	1	0.9	1	0.253	1	0.999
Rpl26	Rpl37	5026969	5023036	10090.ENSMUSP00000073175	10090.ENSMUSP00000046506	0	0	0	0	0.828	0.971	1	0.9	1	0.821	1	0.999
Rps8	Rpl32	5031065	5028158	10090.ENSMUSP00000099757	10090.ENSMUSP00000080523	0	0	0	0	0.937	0.971	1	0.9	1	0.384	1	0.999
Rps3	Rpl8	5020408	5015714	10090.ENSMUSP00000032998	10090.ENSMUSP00000004072	0.172	0	0	0	0.999	0.972	1	0.9	1	0.74	1	0.999
Rpl26	Rps3a1	5026969	5019462	10090.ENSMUSP00000073175	10090.ENSMUSP00000029722	0	0	0.244	0	0.999	0.971	1	0.9	1	0.622	1	0.999
Rps24	Rps17	5034648	5028013	10090.ENSMUSP00000125977	10090.ENSMUSP00000079628	0.13	0	0.2	0	0.909	0.97	1	0.72	1	0.936	1	0.999
Rps26	Rps5	5018537	5015759	10090.ENSMUSP00000026420	10090.ENSMUSP00000004554	0	0	0	0	0.938	0.958	1	0.72	1	0.517	1	0.999
Rpl18	Rps3a1	5031793	5019462	10090.ENSMUSP00000103365	10090.ENSMUSP00000029722	0	0	0	0	0.935	0.882	1	0.9	1	0.214	1	0.999
Rpl30	Rpl10a	5032315	5023403	10090.ENSMUSP00000106014	10090.ENSMUSP00000048469	0	0	0	0	0.909	0.971	1	0.9	1	0.66	1	0.999
Rps27	Rpl37a	5035720	5025033	10090.ENSMUSP00000132102	10090.ENSMUSP00000058919	0	0	0	0	0.83	0.95	1	0.9	1	0.398	1	0.999
Rplp2	Rps25	5028293	5027947	10090.ENSMUSP00000081474	10090.ENSMUSP00000079180	0	0	0	0	0.88	0.858	1	0.9	1	0.653	1	0.999
Rps21	Rpl8	5024953	5015714	10090.ENSMUSP00000058432	10090.ENSMUSP00000004072	0	0	0	0	0.958	0.89	1	0.9	1	0.566	1	0.999
Ndufa9	Ndufab1	5028727	5020457	10090.ENSMUSP00000085523	10090.ENSMUSP00000033157	0.157	0	0	0	0.613	0.97	1	0.9	1	0.603	1	0.999
Rps2	Rps23	5029538	5024346	10090.ENSMUSP00000092502	10090.ENSMUSP00000054490	0.091	0	0	0	0.641	0.939	1	0.9	1	0.605	1	0.999
Rpl31	Rps14	5036727	5018277	10090.ENSMUSP00000137631	10090.ENSMUSP00000025511	0	0	0	0	0.911	0.97	1	0	0	0.784	1	0.999
Ndufs7	Ndufb8	5031381	5018490	10090.ENSMUSP00000101003	10090.ENSMUSP00000026222	0	0	0	0	0.879	0.855	1	0.9	1	0.637	1	0.999
Rps27	Rps9	5035720	5015940	10090.ENSMUSP00000132102	10090.ENSMUSP00000006496	0	0	0	0	0.758	0.958	1	0.9	1	0.465	1	0.999
Rpl22	Rpl32	5034020	5028158	10090.ENSMUSP00000118787	10090.ENSMUSP00000080523	0	0	0	0	0.876	0.971	1	0.9	1	0.407	1	0.999
Rpl35a	Rpl36al	5033146	5032361	10090.ENSMUSP00000110731	10090.ENSMUSP00000106249	0	0	0	0	0.826	0.958	1	0.72	1	0.598	1	0.999
Rps27	Rpl38	5035720	5031605	10090.ENSMUSP00000132102	10090.ENSMUSP00000102213	0	0	0	0	0.873	0.801	1	0.9	1	0.67	1	0.999
Rps27	Rps14	5035720	5018277	10090.ENSMUSP00000132102	10090.ENSMUSP00000025511	0	0	0	0	0.826	0.958	1	0.9	1	0.806	1	0.999
Rpl18	Rpl34	5031793	5028844	10090.ENSMUSP00000103365	10090.ENSMUSP00000086614	0	0	0	0	0.909	0.8	1	0.9	1	0.697	1	0.999
Rpl35a	Rpl3	5033146	5028126	10090.ENSMUSP00000110731	10090.ENSMUSP00000080354	0	0	0	0	0.914	0.86	1	0.9	1	0.447	1	0.999
Rps29	Rpl8	5021660	5015714	10090.ENSMUSP00000038352	10090.ENSMUSP00000004072	0.139	0	0	0	0.863	0.971	1	0.72	1	0.464	1	0.999
Rps16	Rps25	5031918	5027947	10090.ENSMUSP00000103940	10090.ENSMUSP00000079180	0	0	0	0	0.939	0.971	1	0.72	1	0.507	1	0.999
Rpl11	Rpl8	5030979	5015714	10090.ENSMUSP00000099595	10090.ENSMUSP00000004072	0.139	0	0	0	0.857	0.95	1	0.9	1	0.592	1	0.999
Rpl26	Rps26	5026969	5018537	10090.ENSMUSP00000073175	10090.ENSMUSP00000026420	0	0	0	0	0.93	0.958	1	0	0	0.822	1	0.999
Rpl22	Rps19	5034020	5031943	10090.ENSMUSP00000118787	10090.ENSMUSP00000104067	0	0	0	0	0.831	0.896	1	0.9	1	0.852	1	0.999
Rpl6	Rps5	5020043	5015759	10090.ENSMUSP00000031617	10090.ENSMUSP00000004554	0.096	0	0	0	0.902	0.796	1	0.9	1	0.587	1	0.999
Rps10	Rps9	5033114	5015940	10090.ENSMUSP00000110532	10090.ENSMUSP00000006496	0	0	0	0	0.855	0.958	1	0.72	1	0.594	1	0.999
Rpl38	Rplp2	5031605	5028293	10090.ENSMUSP00000102213	10090.ENSMUSP00000081474	0	0	0	0	0.937	0.859	1	0.9	1	0.71	1	0.999
Rps2	Rpl19	5029538	5016512	10090.ENSMUSP00000092502	10090.ENSMUSP00000017548	0.127	0	0	0	0.762	0.939	1	0.9	1	0.513	1	0.999
Psmd8	Psmc6	5023901	5017492	10090.ENSMUSP00000051657	10090.ENSMUSP00000022380	0	0	0	0	0.801	0.896	1	0.9	1	0.758	1	0.999
Ndufs8	Ndufv1	5027191	5022440	10090.ENSMUSP00000074600	10090.ENSMUSP00000042967	0.193	0	0.371	0	0.909	0.958	1	0.9	1	0.889	1	0.999
Rps27	Rps5	5035720	5015759	10090.ENSMUSP00000132102	10090.ENSMUSP00000004554	0	0	0	0	0.868	0.958	1	0.9	1	0.641	1	0.999
Rpl30	Rpl18	5032315	5031793	10090.ENSMUSP00000106014	10090.ENSMUSP00000103365	0.192	0	0	0	0.91	0.969	1	0.9	1	0.604	1	0.999
Rps15a	Rps7	5034103	5027079	10090.ENSMUSP00000119975	10090.ENSMUSP00000073880	0	0	0	0	0.814	0.95	1	0.9	1	0.548	1	0.999
Rpl32	Rps18	5028158	5016094	10090.ENSMUSP00000080523	10090.ENSMUSP00000008812	0	0	0	0	0.826	0.95	1	0.9	1	0.5	1	0.999
Rps27	Rpl30	5035720	5032315	10090.ENSMUSP00000132102	10090.ENSMUSP00000106014	0	0	0	0	0.779	0.958	1	0.9	1	0.63	1	0.999
Rps13	Rps24	5034698	5034648	10090.ENSMUSP00000126294	10090.ENSMUSP00000125977	0.171	0	0	0	0.999	0.97	1	0.72	1	0.724	1	0.999
Rps25	Rpl10a	5027947	5023403	10090.ENSMUSP00000079180	10090.ENSMUSP00000048469	0	0	0	0	0.999	0.971	1	0.9	1	0.626	1	0.999
Rps6	Rps21	5031125	5024953	10090.ENSMUSP00000099878	10090.ENSMUSP00000058432	0	0	0	0	0.909	0.887	1	0.9	1	0.535	1	0.999
Rpl14	Rpl37a	5035620	5025033	10090.ENSMUSP00000131489	10090.ENSMUSP00000058919	0	0	0	0	0.917	0.862	1	0.9	1	0.572	1	0.999
Rps20	Rps6	5034139	5031125	10090.ENSMUSP00000120528	10090.ENSMUSP00000099878	0	0	0	0	0.91	0.97	1	0.72	1	0.692	1	0.999
Rps27a	Rpl26	5031143	5026969	10090.ENSMUSP00000099909	10090.ENSMUSP00000073175	0	0	0	0	0.946	0.896	1	0.9	1	0.352	1	0.999
Rps8	Rpl26	5031065	5026969	10090.ENSMUSP00000099757	10090.ENSMUSP00000073175	0	0	0	0	0.97	0.97	1	0.9	1	0.802	1	0.999
Rps20	Rps23	5034139	5024346	10090.ENSMUSP00000120528	10090.ENSMUSP00000054490	0.164	0	0	0	0.891	0.972	1	0.72	1	0.665	1	0.999
Rps15a	Rpl11	5034103	5030979	10090.ENSMUSP00000119975	10090.ENSMUSP00000099595	0.17	0	0	0	0.81	0.95	1	0.9	1	0.522	1	0.999
Rpl23	Rpl37	5030904	5023036	10090.ENSMUSP00000099435	10090.ENSMUSP00000046506	0	0	0	0	0.851	0.971	1	0.9	1	0.222	1	0.999
Rps29	Rps14	5021660	5018277	10090.ENSMUSP00000038352	10090.ENSMUSP00000025511	0.139	0	0	0	0.907	0.962	1	0.72	1	0.757	1	0.999
Rpl8	Rps11	5015714	5015656	10090.ENSMUSP00000004072	10090.ENSMUSP00000003521	0.172	0	0	0	0.999	0.972	1	0.9	1	0.699	1	0.999
Rpl30	Rps14	5032315	5018277	10090.ENSMUSP00000106014	10090.ENSMUSP00000025511	0	0	0	0	0.913	0.97	1	0.9	1	0.815	1	0.999
Rps24	Rps23	5034648	5024346	10090.ENSMUSP00000125977	10090.ENSMUSP00000054490	0	0	0	0	0.892	0.97	1	0.72	1	0.688	1	0.999
Ndufa8	Ndufa6	5025925	5017711	10090.ENSMUSP00000065352	10090.ENSMUSP00000023085	0	0	0	0	0.845	0.971	1	0.9	1	0.662	1	0.999
Ndufb10	Ndufs3	5022532	5015856	10090.ENSMUSP00000043543	10090.ENSMUSP00000005647	0	0	0	0	0.891	0.958	1	0.9	1	0.442	1	0.999
Rpl4	Rps11	5021039	5015656	10090.ENSMUSP00000034966	10090.ENSMUSP00000003521	0.17	0	0	0	0.92	0.831	1	0.9	1	0.565	1	0.999
Rpl36	Rps25	5027972	5027947	10090.ENSMUSP00000079340	10090.ENSMUSP00000079180	0	0	0	0	0.879	0.95	1	0.9	1	0.557	1	0.999
Rps13	Rps14	5034698	5018277	10090.ENSMUSP00000126294	10090.ENSMUSP00000025511	0.042	0	0.268	0	0.911	0.971	1	0.9	1	0.673	1	0.999
Rps8	Rps3a1	5031065	5019462	10090.ENSMUSP00000099757	10090.ENSMUSP00000029722	0	0	0	0	0.999	0.971	1	0.9	1	0.822	1	0.999
Rpl26	Rps3	5026969	5020408	10090.ENSMUSP00000073175	10090.ENSMUSP00000032998	0.172	0	0.319	0	0.909	0.971	1	0.9	1	0.821	1	0.999
Rpl36	Rps9	5027972	5015940	10090.ENSMUSP00000079340	10090.ENSMUSP00000006496	0	0	0	0	0.741	0.95	1	0.9	1	0.544	1	0.999
Ndufb8	Ndufs3	5018490	5015856	10090.ENSMUSP00000026222	10090.ENSMUSP00000005647	0	0	0	0	0.85	0.956	1	0.9	1	0.711	1	0.999
Ndufs7	Ndufs8	5031381	5027191	10090.ENSMUSP00000101003	10090.ENSMUSP00000074600	0.193	0	0.43	0	0.937	0.962	1	0.9	1	0.895	1	0.999
Rpl34	Rps25	5028844	5027947	10090.ENSMUSP00000086614	10090.ENSMUSP00000079180	0	0	0	0	0.916	0.801	1	0.9	1	0.612	1	0.999
Ndufab1	Ndufs3	5020457	5015856	10090.ENSMUSP00000033157	10090.ENSMUSP00000005647	0	0	0	0	0.811	0.97	1	0.9	1	0.5	1	0.999
Rps3	Rps18	5020408	5016094	10090.ENSMUSP00000032998	10090.ENSMUSP00000008812	0.17	0	0	0	0.803	0.95	1	0.9	1	0.622	1	0.999
Ndufv2	Ndufb8	5034213	5018490	10090.ENSMUSP00000121557	10090.ENSMUSP00000026222	0	0	0	0	0.791	0.891	1	0.9	1	0.62	1	0.999
Rps24	Rps8	5034648	5031065	10090.ENSMUSP00000125977	10090.ENSMUSP00000099757	0	0	0	0	0.937	0.97	1	0.72	1	0.854	1	0.999
Rpl22	Rps14	5034020	5018277	10090.ENSMUSP00000118787	10090.ENSMUSP00000025511	0	0	0	0	0.827	0.97	1	0.9	1	0.839	1	0.999
Rps28	Rps3	5033019	5020408	10090.ENSMUSP00000110013	10090.ENSMUSP00000032998	0	0	0	0	0.862	0.958	1	0.9	1	0.471	1	0.999
Rps28	Rps18	5033019	5016094	10090.ENSMUSP00000110013	10090.ENSMUSP00000008812	0	0	0	0	0.762	0.939	1	0.9	1	0.493	1	0.999
Rpl14	Rpl4	5035620	5021039	10090.ENSMUSP00000131489	10090.ENSMUSP00000034966	0.088	0	0	0	0.915	0.818	1	0.9	1	0.55	1	0.999
Psmc5	Psmd11	5017086	5016515	10090.ENSMUSP00000021049	10090.ENSMUSP00000017572	0	0	0	0	0.798	0.896	1	0.9	1	0.778	1	0.999
Rpl32	Rps9	5028158	5015940	10090.ENSMUSP00000080523	10090.ENSMUSP00000006496	0	0	0	0	0.894	0.971	1	0.9	1	0.193	1	0.999
Psmc4	Psmd14	5020351	5019035	10090.ENSMUSP00000032824	10090.ENSMUSP00000028278	0	0	0	0	0.72	0.972	1	0.9	1	0.747	1	0.999
Rpl22	Rps8	5034020	5031065	10090.ENSMUSP00000118787	10090.ENSMUSP00000099757	0	0	0	0	0.896	0.971	1	0.9	1	0.686	1	0.999
Rps13	Rpl5	5034698	5028222	10090.ENSMUSP00000126294	10090.ENSMUSP00000080854	0	0	0	0	0.999	0.851	1	0	0	0.812	1	0.999
Psmc6	Psmd3	5017492	5016500	10090.ENSMUSP00000022380	10090.ENSMUSP00000017365	0	0	0	0	0.803	0.82	1	0.9	1	0.782	1	0.999
Rps19	Rpl19	5031943	5016512	10090.ENSMUSP00000104067	10090.ENSMUSP00000017548	0	0	0	0	0.942	0.894	1	0.9	1	0.62	1	0.999
Rps6	Rpl4	5031125	5021039	10090.ENSMUSP00000099878	10090.ENSMUSP00000034966	0	0	0	0	0.923	0.823	1	0.9	1	0.668	1	0.999
Ndufa12	Ndufb8	5036277	5018490	10090.ENSMUSP00000136313	10090.ENSMUSP00000026222	0	0	0	0	0.84	0.949	1	0.9	1	0.432	1	0.999
Rps23	Rps3a1	5024346	5019462	10090.ENSMUSP00000054490	10090.ENSMUSP00000029722	0	0	0	0	0.959	0.971	1	0.9	1	0.269	1	0.999
Rps27	Rps3a1	5035720	5019462	10090.ENSMUSP00000132102	10090.ENSMUSP00000029722	0	0	0	0	0.839	0.958	1	0.9	1	0.692	1	0.999
Ndufa6	Ndufs4	5017711	5017465	10090.ENSMUSP00000023085	10090.ENSMUSP00000022286	0	0	0	0	0.82	0.971	1	0.9	1	0.758	1	0.999
Rps27	Rps6	5035720	5031125	10090.ENSMUSP00000132102	10090.ENSMUSP00000099878	0	0	0	0	0.829	0.958	1	0.9	1	0.575	1	0.999
Rps24	Rps7	5034648	5027079	10090.ENSMUSP00000125977	10090.ENSMUSP00000073880	0	0	0	0	0.86	0.95	1	0.72	1	0.647	1	0.999
Rpl10a	Rps5	5023403	5015759	10090.ENSMUSP00000048469	10090.ENSMUSP00000004554	0.164	0	0	0	0.986	0.894	1	0.9	1	0.787	1	0.999
Rps8	Rpl4	5031065	5021039	10090.ENSMUSP00000099757	10090.ENSMUSP00000034966	0	0	0	0	0.942	0.82	1	0.9	1	0.335	1	0.999
Rpl32	Rps7	5028158	5027079	10090.ENSMUSP00000080523	10090.ENSMUSP00000073880	0	0	0	0	0.908	0.95	1	0.9	1	0.201	1	0.999
Rps15a	Rps6	5034103	5031125	10090.ENSMUSP00000119975	10090.ENSMUSP00000099878	0	0	0	0	0.924	0.971	1	0.9	1	0.423	1	0.999
Rpl34	Rpl37a	5028844	5025033	10090.ENSMUSP00000086614	10090.ENSMUSP00000058919	0	0	0	0	0.928	0.801	1	0.9	1	0.498	1	0.999
Rpl3	Rpl10a	5028126	5023403	10090.ENSMUSP00000080354	10090.ENSMUSP00000048469	0.139	0	0	0	0.999	0.827	1	0.9	1	0.611	1	0.999
Rpl23	Rps9	5030904	5015940	10090.ENSMUSP00000099435	10090.ENSMUSP00000006496	0.172	0	0	0	0.921	0.971	1	0.9	1	0.74	1	0.999
Rpl22	Rpl26	5034020	5026969	10090.ENSMUSP00000118787	10090.ENSMUSP00000073175	0	0	0	0	0.91	0.971	1	0.9	1	0.796	1	0.999
Ndufs7	Ndufab1	5031381	5020457	10090.ENSMUSP00000101003	10090.ENSMUSP00000033157	0	0	0	0	0.728	0.97	1	0.9	1	0.609	1	0.999
Rpl23	Rps17	5030904	5028013	10090.ENSMUSP00000099435	10090.ENSMUSP00000079628	0	0	0	0	0.942	0.971	1	0	0	0.541	1	0.999
Rps29	Rps11	5021660	5015656	10090.ENSMUSP00000038352	10090.ENSMUSP00000003521	0.17	0	0	0	0.914	0.971	1	0.72	1	0.516	1	0.999
Rpl5	Rpl19	5028222	5016512	10090.ENSMUSP00000080854	10090.ENSMUSP00000017548	0.193	0	0	0	0.934	0.857	1	0.72	1	0.739	1	0.999
Psmd6	Psmd3	5017456	5016500	10090.ENSMUSP00000022256	10090.ENSMUSP00000017365	0	0	0	0	0.803	0.813	1	0.9	1	0.858	1	0.999
Rps27	Rps7	5035720	5027079	10090.ENSMUSP00000132102	10090.ENSMUSP00000073880	0	0	0	0	0.787	0.939	1	0.9	1	0.466	1	0.999
Ndufs7	Ndufs2	5031381	5016267	10090.ENSMUSP00000101003	10090.ENSMUSP00000013737	0.193	0.887	0.445	0	0.86	0.96	1	0.9	1	0.883	1	0.999
Rpl3	Rps21	5028126	5024953	10090.ENSMUSP00000080354	10090.ENSMUSP00000058432	0	0	0	0	0.912	0.811	1	0.9	1	0.499	1	0.999
Rpl22	Rps3	5034020	5020408	10090.ENSMUSP00000118787	10090.ENSMUSP00000032998	0	0	0	0	0.832	0.971	1	0.9	1	0.588	1	0.999
Ndufab1	Ndufb8	5020457	5018490	10090.ENSMUSP00000033157	10090.ENSMUSP00000026222	0	0	0	0	0.816	0.97	1	0.9	1	0.377	1	0.999
Rps15a	Rpl38	5034103	5031605	10090.ENSMUSP00000119975	10090.ENSMUSP00000102213	0	0	0	0	0.915	0.896	1	0.9	1	0.527	1	0.999
Rpl11	Rps3	5030979	5020408	10090.ENSMUSP00000099595	10090.ENSMUSP00000032998	0.17	0	0	0	0.81	0.95	1	0.9	1	0.713	1	0.999
Rps27a	Rpl10a	5031143	5023403	10090.ENSMUSP00000099909	10090.ENSMUSP00000048469	0	0	0	0	0.928	0.896	1	0.9	1	0.444	1	0.999
Psmd1	Psmd12	5018807	5017092	10090.ENSMUSP00000027432	10090.ENSMUSP00000021063	0	0	0	0	0.823	0.82	1	0.9	1	0.859	1	0.999
Ndufv2	Ndufab1	5034213	5020457	10090.ENSMUSP00000121557	10090.ENSMUSP00000033157	0	0	0	0	0.782	0.97	1	0.9	1	0.491	1	0.999
Ndufb10	Ndufa6	5022532	5017711	10090.ENSMUSP00000043543	10090.ENSMUSP00000023085	0	0	0	0	0.865	0.97	1	0.9	1	0.756	1	0.999
Rps17	Rpl26	5028013	5026969	10090.ENSMUSP00000079628	10090.ENSMUSP00000073175	0	0	0	0	0.962	0.971	1	0	0	0.877	1	0.999
Rpl26	Rps29	5026969	5021660	10090.ENSMUSP00000073175	10090.ENSMUSP00000038352	0.139	0	0	0	0.914	0.971	1	0	0	0.752	1	0.999
Rps28	Rps26	5033019	5018537	10090.ENSMUSP00000110013	10090.ENSMUSP00000026420	0	0	0	0	0.955	0.945	1	0.72	1	0.653	1	0.999
Rpl10a	Rps3a1	5023403	5019462	10090.ENSMUSP00000048469	10090.ENSMUSP00000029722	0	0	0	0	0.944	0.889	1	0.9	1	0.483	1	0.999
Rpl30	Rps26	5032315	5018537	10090.ENSMUSP00000106014	10090.ENSMUSP00000026420	0	0	0	0	0.854	0.958	1	0.72	1	0.694	1	0.999
Rps9	Rps5	5015940	5015759	10090.ENSMUSP00000006496	10090.ENSMUSP00000004554	0.164	0	0	0	0.91	0.972	1	0.9	1	0.706	1	0.999
Psmd8	Psmc2	5023901	5019763	10090.ENSMUSP00000051657	10090.ENSMUSP00000030769	0	0	0	0	0.718	0.882	1	0.9	1	0.789	1	0.999
Rpl30	Rpl37a	5032315	5025033	10090.ENSMUSP00000106014	10090.ENSMUSP00000058919	0	0	0.335	0	0.999	0.97	1	0.9	1	0.496	1	0.999
Rps27	Rps25	5035720	5027947	10090.ENSMUSP00000132102	10090.ENSMUSP00000079180	0	0	0	0	0.835	0.958	1	0.9	1	0.805	1	0.999
Ndufa9	Ndufa8	5028727	5025925	10090.ENSMUSP00000085523	10090.ENSMUSP00000065352	0	0	0	0	0.891	0.951	1	0.9	1	0.721	1	0.999
Ndufs7	Ndufs1	5031381	5018711	10090.ENSMUSP00000101003	10090.ENSMUSP00000027111	0.193	0	0.238	0	0.804	0.961	1	0.9	1	0.815	1	0.999
Rps15a	Rpl35a	5034103	5033146	10090.ENSMUSP00000119975	10090.ENSMUSP00000110731	0	0	0	0	0.937	0.971	1	0.9	1	0.508	1	0.999
Rps3a1	Rpl8	5019462	5015714	10090.ENSMUSP00000029722	10090.ENSMUSP00000004072	0	0	0.236	0	0.999	0.971	1	0.9	1	0.765	1	0.999
Rpl5	Rps5	5028222	5015759	10090.ENSMUSP00000080854	10090.ENSMUSP00000004554	0.172	0	0	0	0.999	0.861	1	0	0	0.788	1	0.999
Rpl4	Rpl19	5021039	5016512	10090.ENSMUSP00000034966	10090.ENSMUSP00000017548	0	0	0	0	0.933	0.824	1	0.9	1	0.712	1	0.999
Psmc5	Psmd3	5017086	5016500	10090.ENSMUSP00000021049	10090.ENSMUSP00000017365	0	0	0	0	0.816	0.896	1	0.9	1	0.768	1	0.999
Rps7	Rpl10a	5027079	5023403	10090.ENSMUSP00000073880	10090.ENSMUSP00000048469	0	0	0	0	0.91	0.95	1	0.9	1	0.381	1	0.999
Ndufs1	Ndufa6	5018711	5017711	10090.ENSMUSP00000027111	10090.ENSMUSP00000023085	0	0	0	0	0.191	0.97	1	0.9	1	0.663	1	0.999
Rpl14	Rps13	5035620	5034698	10090.ENSMUSP00000131489	10090.ENSMUSP00000126294	0	0	0	0	0.905	0.859	1	0.9	1	0.658	1	0.999
Rpl19	Rpl8	5016512	5015714	10090.ENSMUSP00000017548	10090.ENSMUSP00000004072	0.172	0	0.326	0	0.982	0.972	1	0.9	1	0.541	1	0.999
Rps19	Rpl32	5031943	5028158	10090.ENSMUSP00000104067	10090.ENSMUSP00000080523	0	0	0	0	0.91	0.896	1	0.9	1	0.393	1	0.999
Pdia3	Calr	5019139	5015702	10090.ENSMUSP00000028683	10090.ENSMUSP00000003912	0	0	0	0	0.842	0.75	1	0.9	1	0.963	1	0.999
Rps8	Rps17	5031065	5028013	10090.ENSMUSP00000099757	10090.ENSMUSP00000079628	0	0	0	0	0.957	0.971	1	0.72	1	0.675	1	0.999
Rpl23	Rps11	5030904	5015656	10090.ENSMUSP00000099435	10090.ENSMUSP00000003521	0.193	0	0	0	0.999	0.971	1	0.9	1	0.432	1	0.999
Rps28	Rplp2	5033019	5028293	10090.ENSMUSP00000110013	10090.ENSMUSP00000081474	0	0	0	0	0.929	0.799	1	0.9	1	0.607	1	0.999
Rps27	Rps13	5035720	5034698	10090.ENSMUSP00000132102	10090.ENSMUSP00000126294	0	0	0	0	0.819	0.958	1	0.9	1	0.602	1	0.999
Rps19	Rpl11	5031943	5030979	10090.ENSMUSP00000104067	10090.ENSMUSP00000099595	0	0	0	0	0.81	0.768	1	0.9	1	0.894	1	0.999
Rpl32	Rpl10a	5028158	5023403	10090.ENSMUSP00000080523	10090.ENSMUSP00000048469	0	0	0	0	0.917	0.971	1	0.9	1	0.444	1	0.999
Rpl30	Rps7	5032315	5027079	10090.ENSMUSP00000106014	10090.ENSMUSP00000073880	0	0	0	0	0.838	0.95	1	0.9	1	0.249	1	0.999
Rps26	Rpl19	5018537	5016512	10090.ENSMUSP00000026420	10090.ENSMUSP00000017548	0	0	0	0	0.93	0.958	1	0.72	1	0.473	1	0.999
Rpl31	Rps20	5036727	5034139	10090.ENSMUSP00000137631	10090.ENSMUSP00000120528	0	0	0	0	0.918	0.97	1	0	0	0.801	1	0.999
Rpl39	Rpl10	5033187	5016095	10090.ENSMUSP00000110886	10090.ENSMUSP00000008826	0.043	0	0	0	0.821	0.958	1	0.72	1	0.625	1	0.999
Ndufv2	Ndufa8	5034213	5025925	10090.ENSMUSP00000121557	10090.ENSMUSP00000065352	0	0	0	0	0.857	0.959	1	0.9	1	0.514	1	0.999
Rpl22	Rps5	5034020	5015759	10090.ENSMUSP00000118787	10090.ENSMUSP00000004554	0	0	0	0	0.863	0.971	1	0.9	1	0.514	1	0.999
Rpl26	Rps5	5026969	5015759	10090.ENSMUSP00000073175	10090.ENSMUSP00000004554	0.164	0	0	0	0.962	0.971	1	0.9	1	0.41	1	0.999
Rps3	Rps26	5020408	5018537	10090.ENSMUSP00000032998	10090.ENSMUSP00000026420	0	0	0	0	0.853	0.958	1	0.72	1	0.675	1	0.999
Psmd1	Psmc5	5018807	5017086	10090.ENSMUSP00000027432	10090.ENSMUSP00000021049	0	0	0	0	0.836	0.82	1	0.9	1	0.812	1	0.999
Rps24	Rps14	5034648	5018277	10090.ENSMUSP00000125977	10090.ENSMUSP00000025511	0	0	0	0	0.923	0.97	1	0.72	1	0.887	1	0.999
Rpl27	Rpl37a	5029225	5025033	10090.ENSMUSP00000090305	10090.ENSMUSP00000058919	0	0	0	0	0.945	0.958	1	0.72	1	0.42	1	0.999
Rpl23	Rpl3	5030904	5028126	10090.ENSMUSP00000099435	10090.ENSMUSP00000080354	0.17	0	0.227	0	0.999	0.871	1	0.9	1	0.424	1	0.999
Rps25	Rps21	5027947	5024953	10090.ENSMUSP00000079180	10090.ENSMUSP00000058432	0	0	0	0	0.965	0.896	1	0.9	1	0.619	1	0.999
Rps28	Rps21	5033019	5024953	10090.ENSMUSP00000110013	10090.ENSMUSP00000058432	0	0	0	0	0.955	0.801	1	0.9	1	0.625	1	0.999
Rps7	Rps3a1	5027079	5019462	10090.ENSMUSP00000073880	10090.ENSMUSP00000029722	0	0	0	0	0.856	0.95	1	0.9	1	0.326	1	0.999
Ndufv2	Ndufs4	5034213	5017465	10090.ENSMUSP00000121557	10090.ENSMUSP00000022286	0	0	0	0	0.837	0.964	1	0.9	1	0.743	1	0.999
Rpl3	Rpl8	5028126	5015714	10090.ENSMUSP00000080354	10090.ENSMUSP00000004072	0.139	0	0	0	0.999	0.87	1	0.9	1	0.768	1	0.999
Psmd14	Psmd6	5019035	5017456	10090.ENSMUSP00000028278	10090.ENSMUSP00000022256	0	0	0	0	0.897	0.811	1	0.9	1	0.822	1	0.999
Rps3	Rps3a1	5020408	5019462	10090.ENSMUSP00000032998	10090.ENSMUSP00000029722	0	0	0.224	0	0.999	0.971	1	0.9	1	0.678	1	0.999
Rpl35a	Rps17	5033146	5028013	10090.ENSMUSP00000110731	10090.ENSMUSP00000079628	0	0	0	0	0.91	0.971	1	0	0	0.931	1	0.999
Ndufs1	Ndufb9	5018711	5017677	10090.ENSMUSP00000027111	10090.ENSMUSP00000022980	0	0	0	0	0.782	0.96	1	0.9	1	0.476	1	0.999
Rpl11	Rps11	5030979	5015656	10090.ENSMUSP00000099595	10090.ENSMUSP00000003521	0.17	0	0	0	0.859	0.95	1	0.9	1	0.632	1	0.999
Rpl10a	Rps18	5023403	5016094	10090.ENSMUSP00000048469	10090.ENSMUSP00000008812	0.139	0	0	0	0.814	0.95	1	0.9	1	0.204	1	0.999
Ndufa10	Ndufa6	5018820	5017711	10090.ENSMUSP00000027478	10090.ENSMUSP00000023085	0	0	0	0	0.558	0.97	1	0.9	1	0.716	1	0.999
Ndufa12	Ndufb10	5036277	5022532	10090.ENSMUSP00000136313	10090.ENSMUSP00000043543	0	0	0	0	0.816	0.938	1	0.9	1	0.706	1	0.999
Rps13	Rpl38	5034698	5031605	10090.ENSMUSP00000126294	10090.ENSMUSP00000102213	0	0	0	0	0.875	0.896	1	0.9	1	0.513	1	0.999
Rpl19	Rps9	5016512	5015940	10090.ENSMUSP00000017548	10090.ENSMUSP00000006496	0	0	0	0	0.91	0.972	1	0.9	1	0.595	1	0.999
Rpl26	Rps23	5026969	5024346	10090.ENSMUSP00000073175	10090.ENSMUSP00000054490	0.164	0	0	0	0.922	0.971	1	0.9	1	0.765	1	0.999
Rps6	Rpl37	5031125	5023036	10090.ENSMUSP00000099878	10090.ENSMUSP00000046506	0	0	0	0	0.826	0.971	1	0.9	1	0.328	1	0.999
Rps23	Rps3	5024346	5020408	10090.ENSMUSP00000054490	10090.ENSMUSP00000032998	0.172	0	0	0	0.922	0.972	1	0.9	1	0.529	1	0.999
Rpl7	Rpl37a	5026693	5025033	10090.ENSMUSP00000071616	10090.ENSMUSP00000058919	0	0	0	0	0.88	0.961	1	0.72	1	0.564	1	0.999
Rpl11	Rpl19	5030979	5016512	10090.ENSMUSP00000099595	10090.ENSMUSP00000017548	0.17	0	0	0	0.857	0.95	1	0.9	1	0.68	1	0.999
Ndufv1	Ndufa10	5022440	5018820	10090.ENSMUSP00000042967	10090.ENSMUSP00000027478	0	0	0	0	0.776	0.934	1	0.9	1	0.616	1	0.999
Rpl6	Rpl19	5020043	5016512	10090.ENSMUSP00000031617	10090.ENSMUSP00000017548	0.145	0	0	0	0.928	0.795	1	0.9	1	0.757	1	0.999
Rps10	Rps14	5033114	5018277	10090.ENSMUSP00000110532	10090.ENSMUSP00000025511	0	0	0	0	0.858	0.958	1	0.72	1	0.79	1	0.999
Rps8	Rps18	5031065	5016094	10090.ENSMUSP00000099757	10090.ENSMUSP00000008812	0	0	0	0	0.854	0.95	1	0.9	1	0.764	1	0.999
Rpl23	Rps25	5030904	5027947	10090.ENSMUSP00000099435	10090.ENSMUSP00000079180	0	0	0	0	0.999	0.971	1	0.9	1	0.214	1	0.999
Rps3a1	Rps5	5019462	5015759	10090.ENSMUSP00000029722	10090.ENSMUSP00000004554	0	0	0	0	0.937	0.971	1	0.9	1	0.718	1	0.999
Ndufa8	Ndufa10	5025925	5018820	10090.ENSMUSP00000065352	10090.ENSMUSP00000027478	0	0	0	0	0.784	0.923	1	0.9	1	0.563	1	0.999
Rps6	Rps3	5031125	5020408	10090.ENSMUSP00000099878	10090.ENSMUSP00000032998	0	0	0	0	0.929	0.97	1	0.9	1	0.745	1	0.999
Rpl4	Rps5	5021039	5015759	10090.ENSMUSP00000034966	10090.ENSMUSP00000004554	0.139	0	0	0	0.902	0.821	1	0.9	1	0.585	1	0.999
Rpl6	Rps11	5020043	5015656	10090.ENSMUSP00000031617	10090.ENSMUSP00000003521	0.153	0	0	0	0.866	0.798	1	0.9	1	0.649	1	0.999
Rps24	Rpl8	5034648	5015714	10090.ENSMUSP00000125977	10090.ENSMUSP00000004072	0	0	0	0	0.999	0.97	1	0	0	0.675	1	0.999
Rps19	Rps23	5031943	5024346	10090.ENSMUSP00000104067	10090.ENSMUSP00000054490	0	0	0	0	0.93	0.896	1	0.9	1	0.706	1	0.999
Ndufs4	Ndufs2	5017465	5016267	10090.ENSMUSP00000022286	10090.ENSMUSP00000013737	0	0	0	0	0.766	0.958	1	0.9	1	0.764	1	0.999
Ndufa12	Ndufa9	5036277	5028727	10090.ENSMUSP00000136313	10090.ENSMUSP00000085523	0	0	0	0	0.809	0.955	1	0.9	1	0.512	1	0.999
Rpl3	Rps14	5028126	5018277	10090.ENSMUSP00000080354	10090.ENSMUSP00000025511	0.139	0	0	0	0.999	0.851	1	0.9	1	0.522	1	0.999
Rpl30	Rps3	5032315	5020408	10090.ENSMUSP00000106014	10090.ENSMUSP00000032998	0	0	0	0	0.989	0.971	1	0.9	1	0.569	1	0.999
Rpl23	Rps3	5030904	5020408	10090.ENSMUSP00000099435	10090.ENSMUSP00000032998	0.193	0	0	0	0.999	0.971	1	0.9	1	0.524	1	0.999
Rpl14	Rps19	5035620	5031943	10090.ENSMUSP00000131489	10090.ENSMUSP00000104067	0	0	0	0	0.881	0.855	1	0.9	1	0.733	1	0.999
Rps24	Rps20	5034648	5034139	10090.ENSMUSP00000125977	10090.ENSMUSP00000120528	0	0	0	0	0.91	0.97	1	0.72	1	0.787	1	0.999
Ndufb10	Ndufs4	5022532	5017465	10090.ENSMUSP00000043543	10090.ENSMUSP00000022286	0	0	0	0	0.82	0.961	1	0.9	1	0.349	1	0.999
Rpl39	Rpl36al	5033187	5032361	10090.ENSMUSP00000110886	10090.ENSMUSP00000106249	0	0	0	0	0.808	0.958	1	0.72	1	0.841	1	0.999
Ndufs7	Ndufa9	5031381	5028727	10090.ENSMUSP00000101003	10090.ENSMUSP00000085523	0.117	0	0	0	0.866	0.953	1	0.9	1	0.753	1	0.999
Rpl35a	Rps3a1	5033146	5019462	10090.ENSMUSP00000110731	10090.ENSMUSP00000029722	0	0	0	0	0.941	0.971	1	0.9	1	0.354	1	0.999
Rps28	Rpl30	5033019	5032315	10090.ENSMUSP00000110013	10090.ENSMUSP00000106014	0	0	0	0	0.835	0.958	1	0.9	1	0.627	1	0.999
Rpl30	Rps11	5032315	5015656	10090.ENSMUSP00000106014	10090.ENSMUSP00000003521	0	0	0	0	0.939	0.971	1	0.9	1	0.63	1	0.999
Psmc2	Psmd1	5019763	5018807	10090.ENSMUSP00000030769	10090.ENSMUSP00000027432	0	0	0	0	0.827	0.817	1	0.9	1	0.852	1	0.999
Psmc2	Psmc5	5019763	5017086	10090.ENSMUSP00000030769	10090.ENSMUSP00000021049	0	0	0.317	0.926	0.918	0.971	1	0.9	1	0.883	1	0.999
Rps14	Rpl19	5018277	5016512	10090.ENSMUSP00000025511	10090.ENSMUSP00000017548	0	0	0.282	0	0.959	0.97	1	0.9	1	0.789	1	0.999
Rpl35a	Rps8	5033146	5031065	10090.ENSMUSP00000110731	10090.ENSMUSP00000099757	0	0	0	0	0.999	0.971	1	0.9	1	0.491	1	0.999
Rps19	Rps14	5031943	5018277	10090.ENSMUSP00000104067	10090.ENSMUSP00000025511	0	0	0	0	0.929	0.889	1	0.9	1	0.934	1	0.999
Rps15a	Rps8	5034103	5031065	10090.ENSMUSP00000119975	10090.ENSMUSP00000099757	0	0	0	0	0.925	0.971	1	0.9	1	0.607	1	0.999
Ndufa8	Ndufs2	5025925	5016267	10090.ENSMUSP00000065352	10090.ENSMUSP00000013737	0	0	0	0	0.877	0.961	1	0.9	1	0.619	1	0.999
Rps13	Rps29	5034698	5021660	10090.ENSMUSP00000126294	10090.ENSMUSP00000038352	0	0	0	0	0.806	0.971	1	0.72	1	0.67	1	0.999
Rps19	Rps25	5031943	5027947	10090.ENSMUSP00000104067	10090.ENSMUSP00000079180	0	0	0	0	0.999	0.896	1	0.9	1	0.742	1	0.999
Ndufv1	Ndufs1	5022440	5018711	10090.ENSMUSP00000042967	10090.ENSMUSP00000027111	0.193	0	0.412	0	0.877	0.961	1	0.9	1	0.903	1	0.999
Rps8	Rpl6	5031065	5020043	10090.ENSMUSP00000099757	10090.ENSMUSP00000031617	0	0	0	0	0.913	0.794	1	0.9	1	0.761	1	0.999
Rpl23	Rps3a1	5030904	5019462	10090.ENSMUSP00000099435	10090.ENSMUSP00000029722	0	0	0	0	0.999	0.971	1	0.9	1	0.395	1	0.999
Rplp2	Rpl10a	5028293	5023403	10090.ENSMUSP00000081474	10090.ENSMUSP00000048469	0.119	0	0	0	0.902	0.86	1	0.9	1	0.545	1	0.999
Rpl5	Rpl26	5028222	5026969	10090.ENSMUSP00000080854	10090.ENSMUSP00000073175	0.172	0	0.235	0	0.999	0.858	1	0.72	1	0.894	1	0.999
Ndufa12	Ndufs4	5036277	5017465	10090.ENSMUSP00000136313	10090.ENSMUSP00000022286	0	0	0	0	0.826	0.951	1	0.9	1	0.731	1	0.999
Rps19	Rps6	5031943	5031125	10090.ENSMUSP00000104067	10090.ENSMUSP00000099878	0	0	0	0	0.921	0.896	1	0.9	1	0.841	1	0.999
Rps16	Rpl8	5031918	5015714	10090.ENSMUSP00000103940	10090.ENSMUSP00000004072	0.139	0	0	0	0.941	0.971	1	0	0	0.803	1	0.999
Rps6	Rps23	5031125	5024346	10090.ENSMUSP00000099878	10090.ENSMUSP00000054490	0	0	0	0	0.999	0.971	1	0.9	1	0.74	1	0.999
Rpl3	Rps11	5028126	5015656	10090.ENSMUSP00000080354	10090.ENSMUSP00000003521	0.17	0	0	0	0.999	0.862	1	0.9	1	0.622	1	0.999
Rps8	Rpl23	5031065	5030904	10090.ENSMUSP00000099757	10090.ENSMUSP00000099435	0	0	0	0	0.999	0.971	1	0.9	1	0.2	1	0.999
Rpl35a	Rps18	5033146	5016094	10090.ENSMUSP00000110731	10090.ENSMUSP00000008812	0	0	0	0	0.811	0.95	1	0.9	1	0.238	1	0.999
Psmc6	Psmc5	5017492	5017086	10090.ENSMUSP00000022380	10090.ENSMUSP00000021049	0	0	0.433	0.926	0.871	0.971	1	0.9	1	0.883	1	0.999
Cops4	Cops6	5023391	5016737	10090.ENSMUSP00000048416	10090.ENSMUSP00000019638	0	0	0	0	0.319	0.932	1	0.9	1	0.935	1	0.999
Rpl26	Rps11	5026969	5015656	10090.ENSMUSP00000073175	10090.ENSMUSP00000003521	0.172	0	0.226	0	0.96	0.971	1	0.9	1	0.43	1	0.999
Rpl38	Rpl37	5031605	5023036	10090.ENSMUSP00000102213	10090.ENSMUSP00000046506	0	0	0	0	0.867	0.896	1	0.9	1	0.705	1	0.999
Rps19	Rplp2	5031943	5028293	10090.ENSMUSP00000104067	10090.ENSMUSP00000081474	0.152	0	0	0	0.937	0.859	1	0.9	1	0.74	1	0.999
Psmc2	Psmd14	5019763	5019035	10090.ENSMUSP00000030769	10090.ENSMUSP00000028278	0	0	0	0	0.81	0.972	1	0.9	1	0.718	1	0.999
Rps15a	Rpl26	5034103	5026969	10090.ENSMUSP00000119975	10090.ENSMUSP00000073175	0.172	0	0.281	0	0.999	0.971	1	0.9	1	0.535	1	0.999
Rps15a	Rpl10a	5034103	5023403	10090.ENSMUSP00000119975	10090.ENSMUSP00000048469	0.172	0	0	0	0.999	0.971	1	0.9	1	0.649	1	0.999
Rpl35a	Rpl26	5033146	5026969	10090.ENSMUSP00000110731	10090.ENSMUSP00000073175	0	0	0	0	0.941	0.97	1	0.9	1	0.875	1	0.999
Rps13	Rpl23	5034698	5030904	10090.ENSMUSP00000126294	10090.ENSMUSP00000099435	0	0	0	0	0.91	0.971	1	0.9	1	0.617	1	0.999
Rps8	Rps25	5031065	5027947	10090.ENSMUSP00000099757	10090.ENSMUSP00000079180	0	0	0	0	0.999	0.971	1	0.9	1	0.775	1	0.999
Psmd8	Psmc1	5023901	5017247	10090.ENSMUSP00000051657	10090.ENSMUSP00000021595	0	0	0	0	0.801	0.896	1	0.9	1	0.735	1	0.999
Rps3a1	Rps18	5019462	5016094	10090.ENSMUSP00000029722	10090.ENSMUSP00000008812	0	0	0	0	0.819	0.95	1	0.9	1	0.36	1	0.999
Rpl36	Rpl19	5027972	5016512	10090.ENSMUSP00000079340	10090.ENSMUSP00000017548	0	0	0	0	0.914	0.95	1	0.9	1	0.546	1	0.999
Ndufv2	Ndufs2	5034213	5016267	10090.ENSMUSP00000121557	10090.ENSMUSP00000013737	0.193	0	0.286	0	0.831	0.962	1	0.9	1	0.826	1	0.999
Rps13	Rps21	5034698	5024953	10090.ENSMUSP00000126294	10090.ENSMUSP00000058432	0	0	0	0	0.906	0.895	1	0.9	1	0.436	1	0.999
Rpl26	Rpl19	5026969	5016512	10090.ENSMUSP00000073175	10090.ENSMUSP00000017548	0.172	0	0.311	0	0.961	0.971	1	0.9	1	0.781	1	0.999
Rps8	Rpl11	5031065	5030979	10090.ENSMUSP00000099757	10090.ENSMUSP00000099595	0	0	0	0	0.845	0.95	1	0.9	1	0.641	1	0.999
Rps3a1	Rps11	5019462	5015656	10090.ENSMUSP00000029722	10090.ENSMUSP00000003521	0	0	0	0	0.999	0.971	1	0.9	1	0.721	1	0.999
Rpl23	Rps21	5030904	5024953	10090.ENSMUSP00000099435	10090.ENSMUSP00000058432	0	0	0	0	0.954	0.896	1	0.9	1	0.14	1	0.999
Rpl18	Rps2	5031793	5029538	10090.ENSMUSP00000103365	10090.ENSMUSP00000092502	0	0	0	0	0.775	0.926	1	0.9	1	0.626	1	0.999
Rpl38	Rps23	5031605	5024346	10090.ENSMUSP00000102213	10090.ENSMUSP00000054490	0	0	0	0	0.892	0.896	1	0.9	1	0.217	1	0.999
Rps17	Rpl15	5028013	5027943	10090.ENSMUSP00000079628	10090.ENSMUSP00000079163	0	0	0	0	0.906	0.958	1	0	0	0.77	1	0.999
Rpl37a	Rpl19	5025033	5016512	10090.ENSMUSP00000058919	10090.ENSMUSP00000017548	0	0	0	0	0.963	0.97	1	0.9	1	0.588	1	0.999
Ndufs4	Ndufs3	5017465	5015856	10090.ENSMUSP00000022286	10090.ENSMUSP00000005647	0	0	0	0	0.826	0.962	1	0.9	1	0.663	1	0.999
Rpl4	Rpl8	5021039	5015714	10090.ENSMUSP00000034966	10090.ENSMUSP00000004072	0.139	0	0	0	0.939	0.846	1	0.9	1	0.673	1	0.999
Rpl32	Rpl37a	5028158	5025033	10090.ENSMUSP00000080523	10090.ENSMUSP00000058919	0	0	0	0	0.959	0.97	1	0.9	1	0.398	1	0.999
Rpl18	Rps23	5031793	5024346	10090.ENSMUSP00000103365	10090.ENSMUSP00000054490	0.172	0	0	0	0.924	0.97	1	0.9	1	0.312	1	0.999
Rps3	Rps5	5020408	5015759	10090.ENSMUSP00000032998	10090.ENSMUSP00000004554	0.172	0	0	0	0.999	0.972	1	0.9	1	0.761	1	0.999
Rpl31	Rpl27-ps3	5036727	5029953	10090.ENSMUSP00000137631	10090.ENSMUSP00000095287	0	0	0	0	0.809	0.958	1	0.72	1	0.705	1	0.999
Rps20	Rpl26	5034139	5026969	10090.ENSMUSP00000120528	10090.ENSMUSP00000073175	0.164	0	0	0	0.899	0.971	1	0	0	0.794	1	0.999
Rps19	Rpl26	5031943	5026969	10090.ENSMUSP00000104067	10090.ENSMUSP00000073175	0	0	0	0	0.938	0.896	1	0.9	1	0.875	1	0.999
Rps13	Rpl19	5034698	5016512	10090.ENSMUSP00000126294	10090.ENSMUSP00000017548	0	0	0.205	0	0.915	0.972	1	0.9	1	0.41	1	0.999
Rps9	Rpl8	5015940	5015714	10090.ENSMUSP00000006496	10090.ENSMUSP00000004072	0.164	0	0	0	0.911	0.972	1	0.9	1	0.588	1	0.999
Psmd8	Psmd7	5023901	5022298	10090.ENSMUSP00000051657	10090.ENSMUSP00000041968	0	0	0	0	0.797	0.884	1	0.9	1	0.802	1	0.999
Rps6	Rps3a1	5031125	5019462	10090.ENSMUSP00000099878	10090.ENSMUSP00000029722	0.042	0	0	0	0.942	0.971	1	0.9	1	0.749	1	0.999
Rps19	Rps9	5031943	5015940	10090.ENSMUSP00000104067	10090.ENSMUSP00000006496	0	0	0.27	0	0.941	0.896	1	0.9	1	0.661	1	0.999
Rps6	Rps14	5031125	5018277	10090.ENSMUSP00000099878	10090.ENSMUSP00000025511	0	0	0	0	0.929	0.97	1	0.9	1	0.811	1	0.999
Rps28	Rps9	5033019	5015940	10090.ENSMUSP00000110013	10090.ENSMUSP00000006496	0	0	0	0	0.862	0.958	1	0.9	1	0.51	1	0.999
Rps27a	Rpl37a	5031143	5025033	10090.ENSMUSP00000099909	10090.ENSMUSP00000058919	0	0	0	0	0.96	0.889	1	0.9	1	0.103	1	0.999
Rps28	Rps11	5033019	5015656	10090.ENSMUSP00000110013	10090.ENSMUSP00000003521	0	0	0	0	0.93	0.958	1	0.9	1	0.652	1	0.999
Ndufs8	Ndufs3	5027191	5015856	10090.ENSMUSP00000074600	10090.ENSMUSP00000005647	0.193	0	0.438	0	0.879	0.96	1	0.9	1	0.874	1	0.999
Rpl36al	Rpl8	5032361	5015714	10090.ENSMUSP00000106249	10090.ENSMUSP00000004072	0	0	0	0	0.846	0.958	1	0.72	1	0.647	1	0.999
Rps27a	Rps23	5031143	5024346	10090.ENSMUSP00000099909	10090.ENSMUSP00000054490	0	0	0	0	0.912	0.896	1	0.9	1	0.136	1	0.999
Rps24	Rps6	5034648	5031125	10090.ENSMUSP00000125977	10090.ENSMUSP00000099878	0.182	0	0	0	0.999	0.97	1	0.72	1	0.772	1	0.999
Ndufa13	Ndufa6	5032274	5017711	10090.ENSMUSP00000105796	10090.ENSMUSP00000023085	0	0	0	0	0.875	0.971	1	0.9	1	0.104	1	0.999
Rps3	Rps11	5020408	5015656	10090.ENSMUSP00000032998	10090.ENSMUSP00000003521	0.193	0	0	0	0.958	0.972	1	0.9	1	0.727	1	0.999
Rps13	Rps23	5034698	5024346	10090.ENSMUSP00000126294	10090.ENSMUSP00000054490	0.043	0	0	0	0.897	0.971	1	0.9	1	0.66	1	0.999
Rps7	Rpl19	5027079	5016512	10090.ENSMUSP00000073880	10090.ENSMUSP00000017548	0	0	0	0	0.925	0.95	1	0.9	1	0.292	1	0.999
Cox5b	Cox5a	5028064	5015244	10090.ENSMUSP00000079944	10090.ENSMUSP00000000090	0	0	0	0	0.856	0.731	1	0.9	1	0.84	1	0.999
Rpl26	Rpl10	5026969	5016095	10090.ENSMUSP00000073175	10090.ENSMUSP00000008826	0.098	0	0	0	0.917	0.958	1	0.72	1	0.233	1	0.999
Rpl22	Rps25	5034020	5027947	10090.ENSMUSP00000118787	10090.ENSMUSP00000079180	0	0	0	0	0.884	0.971	1	0.9	1	0.639	1	0.999
Rpl38	Rpl8	5031605	5015714	10090.ENSMUSP00000102213	10090.ENSMUSP00000004072	0	0	0	0	0.879	0.896	1	0.9	1	0.36	1	0.999
Rpl10a	Rps3	5023403	5020408	10090.ENSMUSP00000048469	10090.ENSMUSP00000032998	0.172	0	0	0	0.946	0.842	1	0.9	1	0.478	1	0.999
Rpl30	Rpl36	5032315	5027972	10090.ENSMUSP00000106014	10090.ENSMUSP00000079340	0	0	0	0	0.736	0.95	1	0.9	1	0.356	1	0.999
Rps6	Rps18	5031125	5016094	10090.ENSMUSP00000099878	10090.ENSMUSP00000008812	0	0	0	0	0.81	0.95	1	0.9	1	0.544	1	0.999
Rps28	Rpl10a	5033019	5023403	10090.ENSMUSP00000110013	10090.ENSMUSP00000048469	0	0	0	0	0.858	0.958	1	0.9	1	0.563	1	0.999
Rps8	Rps7	5031065	5027079	10090.ENSMUSP00000099757	10090.ENSMUSP00000073880	0	0	0	0	0.93	0.95	1	0.9	1	0.462	1	0.999
Rpl3	Rps3	5028126	5020408	10090.ENSMUSP00000080354	10090.ENSMUSP00000032998	0.17	0	0.207	0	0.999	0.812	1	0.9	1	0.755	1	0.999
Rpl39	Rpl37a	5033187	5025033	10090.ENSMUSP00000110886	10090.ENSMUSP00000058919	0	0	0	0	0.937	0.97	1	0.72	1	0.512	1	0.999
Rpl35a	Rps23	5033146	5024346	10090.ENSMUSP00000110731	10090.ENSMUSP00000054490	0	0	0	0	0.881	0.971	1	0.9	1	0.318	1	0.999
Rps20	Rps17	5034139	5028013	10090.ENSMUSP00000120528	10090.ENSMUSP00000079628	0	0	0	0	0.91	0.972	1	0.72	1	0.785	1	0.999
Rps8	Rpl3	5031065	5028126	10090.ENSMUSP00000099757	10090.ENSMUSP00000080354	0	0	0	0	0.999	0.856	1	0.9	1	0.799	1	0.999
Rpl37a	Rpl10a	5025033	5023403	10090.ENSMUSP00000058919	10090.ENSMUSP00000048469	0	0	0	0	0.957	0.97	1	0.9	1	0.327	1	0.999
Rpl22	Rpl38	5034020	5031605	10090.ENSMUSP00000118787	10090.ENSMUSP00000102213	0	0	0	0	0.839	0.896	1	0.9	1	0.788	1	0.999
Rps28	Rps6	5033019	5031125	10090.ENSMUSP00000110013	10090.ENSMUSP00000099878	0.172	0	0	0	0.862	0.958	1	0.9	1	0.521	1	0.999
Rpl36	Rpl37	5027972	5023036	10090.ENSMUSP00000079340	10090.ENSMUSP00000046506	0	0	0	0	0.684	0.95	1	0.9	1	0.452	1	0.999
Rps13	Rpl8	5034698	5015714	10090.ENSMUSP00000126294	10090.ENSMUSP00000004072	0	0	0.201	0	0.914	0.972	1	0.9	1	0.697	1	0.999
Ndufv1	Ndufb9	5022440	5017677	10090.ENSMUSP00000042967	10090.ENSMUSP00000022980	0	0	0	0	0.832	0.924	1	0.9	1	0.59	1	0.999
Rpl35a	Rpl32	5033146	5028158	10090.ENSMUSP00000110731	10090.ENSMUSP00000080523	0	0	0	0	0.91	0.971	1	0.9	1	0.331	1	0.999
Rpl18	Rpl23	5031793	5030904	10090.ENSMUSP00000103365	10090.ENSMUSP00000099435	0	0	0	0	0.914	0.97	1	0.9	1	0.138	1	0.999
Ndufa12	Ndufv2	5036277	5034213	10090.ENSMUSP00000136313	10090.ENSMUSP00000121557	0	0	0	0	0.874	0.951	1	0.9	1	0.632	1	0.999
Rps15a	Rps19	5034103	5031943	10090.ENSMUSP00000119975	10090.ENSMUSP00000104067	0	0	0	0	0.999	0.896	1	0.9	1	0.586	1	0.999
Rpl31	Rps11	5036727	5015656	10090.ENSMUSP00000137631	10090.ENSMUSP00000003521	0	0	0	0	0.916	0.971	1	0	0	0.711	1	0.999
Rpl36a	Rpl8	5032811	5015714	10090.ENSMUSP00000108837	10090.ENSMUSP00000004072	0	0	0	0	0.915	0.958	1	0.72	1	0.647	1	0.999
Rps19	Rpl3	5031943	5028126	10090.ENSMUSP00000104067	10090.ENSMUSP00000080354	0	0	0	0	0.999	0.861	1	0.9	1	0.727	1	0.999
Rpl37	Rps18	5023036	5016094	10090.ENSMUSP00000046506	10090.ENSMUSP00000008812	0	0	0	0	0.736	0.95	1	0.9	1	0.498	1	0.999
Rps8	Rps23	5031065	5024346	10090.ENSMUSP00000099757	10090.ENSMUSP00000054490	0	0	0	0	0.94	0.971	1	0.9	1	0.839	1	0.999
Rps10	Rps3	5033114	5020408	10090.ENSMUSP00000110532	10090.ENSMUSP00000032998	0	0	0	0	0.823	0.958	1	0.72	1	0.62	1	0.999
Rps10	Rpl26	5033114	5026969	10090.ENSMUSP00000110532	10090.ENSMUSP00000073175	0	0	0	0	0.93	0.958	1	0	0	0.846	1	0.999
Rpl36	Rpl8	5027972	5015714	10090.ENSMUSP00000079340	10090.ENSMUSP00000004072	0	0	0	0	0.91	0.95	1	0.9	1	0.62	1	0.999
Rpl3	Rps3a1	5028126	5019462	10090.ENSMUSP00000080354	10090.ENSMUSP00000029722	0	0	0	0	0.999	0.86	1	0.9	1	0.508	1	0.999
Rpl5	Rps25	5028222	5027947	10090.ENSMUSP00000080854	10090.ENSMUSP00000079180	0	0	0	0	0.999	0.876	1	0	0	0.851	1	0.999
Rpl11	Rps7	5030979	5027079	10090.ENSMUSP00000099595	10090.ENSMUSP00000073880	0	0	0	0	0.782	0.929	1	0.9	1	0.757	1	0.999
Rpl5	Rpl10a	5028222	5023403	10090.ENSMUSP00000080854	10090.ENSMUSP00000048469	0.172	0	0	0	0.999	0.836	1	0.72	1	0.649	1	0.999
Rpl3	Rpl7	5028126	5026693	10090.ENSMUSP00000080354	10090.ENSMUSP00000071616	0.098	0	0	0	0.999	0.818	1	0.72	1	0.743	1	0.999
Rps14	Rpl8	5018277	5015714	10090.ENSMUSP00000025511	10090.ENSMUSP00000004072	0.164	0	0.392	0	0.999	0.971	1	0.9	1	0.718	1	0.999
Rpl36a	Rpl30	5032811	5032315	10090.ENSMUSP00000108837	10090.ENSMUSP00000106014	0	0	0	0	0.87	0.958	1	0.72	1	0.453	1	0.999
Rps27	Rps23	5035720	5024346	10090.ENSMUSP00000132102	10090.ENSMUSP00000054490	0	0	0	0	0.864	0.958	1	0.9	1	0.668	1	0.999
Rps15a	Rpl30	5034103	5032315	10090.ENSMUSP00000119975	10090.ENSMUSP00000106014	0	0	0	0	0.939	0.971	1	0.9	1	0.527	1	0.999
Ndufs8	Ndufs2	5027191	5016267	10090.ENSMUSP00000074600	10090.ENSMUSP00000013737	0.193	0	0.436	0	0.76	0.958	1	0.9	1	0.887	1	0.999
Rps29	Rps26	5021660	5018537	10090.ENSMUSP00000038352	10090.ENSMUSP00000026420	0	0	0	0	0.925	0.956	1	0.72	1	0.713	1	0.999
Rps10	Rps6	5033114	5031125	10090.ENSMUSP00000110532	10090.ENSMUSP00000099878	0	0	0	0	0.798	0.958	1	0.72	1	0.684	1	0.999
Rps10	Rps7	5033114	5027079	10090.ENSMUSP00000110532	10090.ENSMUSP00000073880	0	0	0	0	0.871	0.939	1	0.72	1	0.633	1	0.999
Ndufs1	Ndufs4	5018711	5017465	10090.ENSMUSP00000027111	10090.ENSMUSP00000022286	0	0	0	0	0.802	0.961	1	0.9	1	0.711	1	0.999
Rpl27	Rpl8	5029225	5015714	10090.ENSMUSP00000090305	10090.ENSMUSP00000004072	0.107	0	0	0	0.924	0.958	1	0.72	1	0.521	1	0.999
Rpl5	Rpl8	5028222	5015714	10090.ENSMUSP00000080854	10090.ENSMUSP00000004072	0.172	0	0	0	0.999	0.863	1	0.72	1	0.718	1	0.999
Rps15a	Rps18	5034103	5016094	10090.ENSMUSP00000119975	10090.ENSMUSP00000008812	0.17	0	0	0	0.814	0.95	1	0.9	1	0.422	1	0.999
Rps20	Rps3a1	5034139	5019462	10090.ENSMUSP00000120528	10090.ENSMUSP00000029722	0	0	0	0	0.926	0.971	1	0.72	1	0.634	1	0.999
Psmc2	Psmd11	5019763	5016515	10090.ENSMUSP00000030769	10090.ENSMUSP00000017572	0	0	0	0	0.771	0.896	1	0.9	1	0.733	1	0.999
Rpl10a	Rpl4	5023403	5021039	10090.ENSMUSP00000048469	10090.ENSMUSP00000034966	0.139	0	0	0	0.938	0.82	1	0.9	1	0.51	1	0.999
Rplp2	Rpl8	5028293	5015714	10090.ENSMUSP00000081474	10090.ENSMUSP00000004072	0	0	0	0	0.918	0.883	1	0.9	1	0.261	1	0.999
Rpl30	Rps16	5032315	5031918	10090.ENSMUSP00000106014	10090.ENSMUSP00000103940	0.17	0	0	0	0.937	0.971	1	0	0	0.796	1	0.999
Rps15a	Rps21	5034103	5024953	10090.ENSMUSP00000119975	10090.ENSMUSP00000058432	0	0	0	0	0.934	0.896	1	0.9	1	0.387	1	0.999
Rpl35a	Rps14	5033146	5018277	10090.ENSMUSP00000110731	10090.ENSMUSP00000025511	0	0	0	0	0.938	0.97	1	0.9	1	0.852	1	0.999
Rps20	Rps28	5034139	5033019	10090.ENSMUSP00000120528	10090.ENSMUSP00000110013	0	0	0	0	0.909	0.958	1	0.72	1	0.594	1	0.999
Rpl23	Rpl5	5030904	5028222	10090.ENSMUSP00000099435	10090.ENSMUSP00000080854	0.193	0	0	0	0.999	0.867	1	0.72	1	0.622	1	0.999
Rps20	Rps11	5034139	5015656	10090.ENSMUSP00000120528	10090.ENSMUSP00000003521	0.172	0	0	0	0.999	0.972	1	0.72	1	0.718	1	0.999
Ndufa9	Ndufs4	5028727	5017465	10090.ENSMUSP00000085523	10090.ENSMUSP00000022286	0	0	0	0	0.8	0.955	1	0.9	1	0.669	1	0.999
Uba52	Rps25	5034113	5027947	10090.ENSMUSP00000120096	10090.ENSMUSP00000079180	0	0	0	0	0.704	0.945	1	0.9	1	0.549	1	0.999
Rpl36	Rps14	5027972	5018277	10090.ENSMUSP00000079340	10090.ENSMUSP00000025511	0	0	0	0	0.861	0.945	1	0.9	1	0.722	1	0.999
Psmd12	Psmc5	5017092	5017086	10090.ENSMUSP00000021063	10090.ENSMUSP00000021049	0	0	0	0	0.825	0.892	1	0.9	1	0.831	1	0.999
Rps6	Rps8	5031125	5031065	10090.ENSMUSP00000099878	10090.ENSMUSP00000099757	0	0	0	0	0.952	0.971	1	0.9	1	0.816	1	0.999
Rps27a	Rps5	5031143	5015759	10090.ENSMUSP00000099909	10090.ENSMUSP00000004554	0	0	0	0	0.935	0.896	1	0.9	1	0.357	1	0.999
Rps13	Rps25	5034698	5027947	10090.ENSMUSP00000126294	10090.ENSMUSP00000079180	0	0	0	0	0.999	0.971	1	0.9	1	0.747	1	0.999
Rps28	Rpl11	5033019	5030979	10090.ENSMUSP00000110013	10090.ENSMUSP00000099595	0	0	0	0	0.764	0.939	1	0.9	1	0.493	1	0.999
Rps14	Rps9	5018277	5015940	10090.ENSMUSP00000025511	10090.ENSMUSP00000006496	0.164	0	0	0	0.928	0.97	1	0.9	1	0.743	1	0.999
Rps6	Rpl32	5031125	5028158	10090.ENSMUSP00000099878	10090.ENSMUSP00000080523	0	0	0	0	0.909	0.971	1	0.9	1	0.591	1	0.999
Rpl36	Rps11	5027972	5015656	10090.ENSMUSP00000079340	10090.ENSMUSP00000003521	0	0	0	0	0.896	0.95	1	0.9	1	0.607	1	0.999
Ndufa8	Ndufab1	5025925	5020457	10090.ENSMUSP00000065352	10090.ENSMUSP00000033157	0	0	0	0	0.812	0.97	1	0.9	1	0.279	1	0.999
Rpl32	Rps14	5028158	5018277	10090.ENSMUSP00000080523	10090.ENSMUSP00000025511	0	0	0	0	0.938	0.97	1	0.9	1	0.622	1	0.999
Psmd14	Psmc5	5019035	5017086	10090.ENSMUSP00000028278	10090.ENSMUSP00000021049	0	0	0	0	0.784	0.983	1	0.9	1	0.717	1	0.999
Ndufv2	Ndufb10	5034213	5022532	10090.ENSMUSP00000121557	10090.ENSMUSP00000043543	0	0	0	0	0.832	0.94	1	0.9	1	0.516	1	0.999
Rps16	Rps17	5031918	5028013	10090.ENSMUSP00000103940	10090.ENSMUSP00000079628	0	0	0	0	0.908	0.971	1	0.72	1	0.81	1	0.999
Rps15a	Rps16	5034103	5031918	10090.ENSMUSP00000119975	10090.ENSMUSP00000103940	0.17	0	0	0	0.931	0.971	1	0.72	1	0.686	1	0.999
Rps15a	Rps23	5034103	5024346	10090.ENSMUSP00000119975	10090.ENSMUSP00000054490	0.172	0	0	0	0.931	0.972	1	0.9	1	0.778	1	0.999
Rpl7	Rpl10a	5026693	5023403	10090.ENSMUSP00000071616	10090.ENSMUSP00000048469	0.114	0	0	0	0.962	0.824	1	0.72	1	0.575	1	0.999
Rpl7	Rpl8	5026693	5015714	10090.ENSMUSP00000071616	10090.ENSMUSP00000004072	0.119	0	0	0	0.999	0.962	1	0.72	1	0.635	1	0.999
Cops4	Cops5	5023391	5018696	10090.ENSMUSP00000048416	10090.ENSMUSP00000027050	0	0	0	0	0.591	0.933	1	0.9	1	0.9	1	0.999
Rpl6	Rps14	5020043	5018277	10090.ENSMUSP00000031617	10090.ENSMUSP00000025511	0.107	0	0	0	0.862	0.796	1	0.9	1	0.768	1	0.999
Rps3a1	Rpl19	5019462	5016512	10090.ENSMUSP00000029722	10090.ENSMUSP00000017548	0	0	0.336	0	0.94	0.889	1	0.9	1	0.674	1	0.999
Rps5	Rpl8	5015759	5015714	10090.ENSMUSP00000004554	10090.ENSMUSP00000004072	0.164	0	0	0	0.998	0.972	1	0.9	1	0.784	1	0.999
Rps3	Rps14	5020408	5018277	10090.ENSMUSP00000032998	10090.ENSMUSP00000025511	0.172	0	0.247	0	0.999	0.971	1	0.9	1	0.841	1	0.999
Psmc4	Psmc1	5020351	5017247	10090.ENSMUSP00000032824	10090.ENSMUSP00000021595	0	0	0.403	0.936	0.874	0.972	1	0.9	1	0.843	1	0.999
Rpl34	Rps5	5028844	5015759	10090.ENSMUSP00000086614	10090.ENSMUSP00000004554	0	0	0	0	0.924	0.801	1	0.9	1	0.444	1	0.999
Rps24	Rps25	5034648	5027947	10090.ENSMUSP00000125977	10090.ENSMUSP00000079180	0	0	0	0	0.999	0.97	1	0.72	1	0.82	1	0.999
Rps16	Rps18	5031918	5016094	10090.ENSMUSP00000103940	10090.ENSMUSP00000008812	0.113	0	0	0	0.828	0.95	1	0.72	1	0.621	1	0.999
Rpl38	Rpl23	5031605	5030904	10090.ENSMUSP00000102213	10090.ENSMUSP00000099435	0	0	0	0	0.935	0.896	1	0.9	1	0.269	1	0.999
Rps6	Rpl11	5031125	5030979	10090.ENSMUSP00000099878	10090.ENSMUSP00000099595	0	0	0	0	0.812	0.95	1	0.9	1	0.642	1	0.999
Rpl14	Rpl19	5035620	5016512	10090.ENSMUSP00000131489	10090.ENSMUSP00000017548	0.145	0	0	0	0.881	0.817	1	0.9	1	0.559	1	0.999
Rpl30	Rpl37	5032315	5023036	10090.ENSMUSP00000106014	10090.ENSMUSP00000046506	0	0	0	0	0.851	0.971	1	0.9	1	0.694	1	0.999
Ndufv1	Ndufs2	5022440	5016267	10090.ENSMUSP00000042967	10090.ENSMUSP00000013737	0.193	0	0.289	0	0.884	0.961	1	0.9	1	0.888	1	0.999
Rpl38	Rps29	5031605	5021660	10090.ENSMUSP00000102213	10090.ENSMUSP00000038352	0	0	0	0	0.934	0.894	1	0.72	1	0.762	1	0.999
Rpl39	Rpl10a	5033187	5023403	10090.ENSMUSP00000110886	10090.ENSMUSP00000048469	0.096	0	0	0	0.836	0.97	1	0.72	1	0.313	1	0.999
Rps15a	Rps3	5034103	5020408	10090.ENSMUSP00000119975	10090.ENSMUSP00000032998	0.193	0	0	0	0.919	0.972	1	0.9	1	0.638	1	0.999
Rpl14	Rpl7	5035620	5026693	10090.ENSMUSP00000131489	10090.ENSMUSP00000071616	0.077	0	0	0	0.917	0.841	1	0.72	1	0.765	1	0.999
Rps24	Rpl35a	5034648	5033146	10090.ENSMUSP00000125977	10090.ENSMUSP00000110731	0	0	0	0	0.902	0.97	1	0	0	0.933	1	0.999
Rpl38	Rps8	5031605	5031065	10090.ENSMUSP00000102213	10090.ENSMUSP00000099757	0	0	0	0	0.937	0.896	1	0.9	1	0.58	1	0.999
Rps8	Rpl37	5031065	5023036	10090.ENSMUSP00000099757	10090.ENSMUSP00000046506	0	0	0	0	0.827	0.97	1	0.9	1	0.414	1	0.999
Psmd14	Psmd3	5019035	5016500	10090.ENSMUSP00000028278	10090.ENSMUSP00000017365	0	0	0	0	0.795	0.896	1	0.9	1	0.822	1	0.999
Ndufa9	Ndufb9	5028727	5017677	10090.ENSMUSP00000085523	10090.ENSMUSP00000022980	0	0	0	0	0.805	0.959	1	0.9	1	0.551	1	0.999
Ndufv2	Ndufs7	5034213	5031381	10090.ENSMUSP00000121557	10090.ENSMUSP00000101003	0.193	0	0.248	0	0.858	0.959	1	0.9	1	0.816	1	0.999
Rps13	Rpl30	5034698	5032315	10090.ENSMUSP00000126294	10090.ENSMUSP00000106014	0	0	0.221	0	0.911	0.971	1	0.9	1	0.831	1	0.999
Rps16	Rps29	5031918	5021660	10090.ENSMUSP00000103940	10090.ENSMUSP00000038352	0.113	0	0	0	0.862	0.971	1	0.72	1	0.563	1	0.999
Uqcrc2	Cyc1	5020466	5017751	10090.ENSMUSP00000033176	10090.ENSMUSP00000023210	0	0	0	0	0.88	0.903	1	0.9	1	0.792	1	0.999
Rpl38	Rpl19	5031605	5016512	10090.ENSMUSP00000102213	10090.ENSMUSP00000017548	0	0	0	0	0.951	0.896	1	0.9	1	0.743	1	0.999
Psmc4	Psmd11	5020351	5016515	10090.ENSMUSP00000032824	10090.ENSMUSP00000017572	0	0	0	0	0.795	0.896	1	0.9	1	0.824	1	0.999
Rps27a	Rps21	5031143	5024953	10090.ENSMUSP00000099909	10090.ENSMUSP00000058432	0	0	0	0	0.949	0.889	1	0.9	1	0.271	1	0.999
Ndufb9	Ndufs2	5017677	5016267	10090.ENSMUSP00000022980	10090.ENSMUSP00000013737	0	0	0	0	0.819	0.937	1	0.9	1	0.482	1	0.999
Rpl19	Rps5	5016512	5015759	10090.ENSMUSP00000017548	10090.ENSMUSP00000004554	0	0	0	0	0.977	0.896	1	0.9	1	0.6	1	0.999
Rps10	Rps5	5033114	5015759	10090.ENSMUSP00000110532	10090.ENSMUSP00000004554	0	0	0	0	0.929	0.958	1	0.72	1	0.665	1	0.999
Rps10	Rps3a1	5033114	5019462	10090.ENSMUSP00000110532	10090.ENSMUSP00000029722	0	0	0	0	0.813	0.958	1	0.72	1	0.648	1	0.999
Rps19	Rpl10a	5031943	5023403	10090.ENSMUSP00000104067	10090.ENSMUSP00000048469	0.172	0	0	0	0.999	0.89	1	0.9	1	0.65	1	0.999
Rps8	Rplp2	5031065	5028293	10090.ENSMUSP00000099757	10090.ENSMUSP00000081474	0	0	0	0	0.955	0.855	1	0.9	1	0.521	1	0.999
Ndufv2	Ndufa6	5034213	5017711	10090.ENSMUSP00000121557	10090.ENSMUSP00000023085	0	0	0	0	0.865	0.971	1	0.9	1	0.583	1	0.999
Rpl22	Rpl39	5034020	5033187	10090.ENSMUSP00000118787	10090.ENSMUSP00000110886	0	0	0	0	0.827	0.97	1	0.72	1	0.651	1	0.999
Rps15a	Rpl3	5034103	5028126	10090.ENSMUSP00000119975	10090.ENSMUSP00000080354	0.17	0	0.244	0	0.913	0.858	1	0.9	1	0.679	1	0.999
Rps24	Rpl37a	5034648	5025033	10090.ENSMUSP00000125977	10090.ENSMUSP00000058919	0	0	0	0	0.942	0.97	1	0	0	0.647	1	0.999
Rpl15	Rpl8	5027943	5015714	10090.ENSMUSP00000079163	10090.ENSMUSP00000004072	0	0	0.3	0	0.91	0.958	1	0.72	1	0.396	1	0.999
Rpl31	Rpl15	5036727	5027943	10090.ENSMUSP00000137631	10090.ENSMUSP00000079163	0	0	0	0	0.818	0.958	1	0.72	1	0.757	1	0.999
Nop58	Rrp9	5037094	5021708	10090.ENSMUSP00000140250	10090.ENSMUSP00000038580	0	0	0	0	0.81	0.792	1	0.9	1	0.86	1	0.999
Rps19	Rpl38	5031943	5031605	10090.ENSMUSP00000104067	10090.ENSMUSP00000102213	0	0	0	0	0.898	0.896	1	0.9	1	0.858	1	0.999
Rps15a	Rpl23	5034103	5030904	10090.ENSMUSP00000119975	10090.ENSMUSP00000099435	0.193	0	0.205	0	0.999	0.971	1	0.9	1	0.527	1	0.999
Rpl38	Rpl26	5031605	5026969	10090.ENSMUSP00000102213	10090.ENSMUSP00000073175	0	0	0	0	0.937	0.896	1	0.9	1	0.802	1	0.999
Rps2	Rpl26	5029538	5026969	10090.ENSMUSP00000092502	10090.ENSMUSP00000073175	0.091	0	0.219	0	0.761	0.938	1	0.9	1	0.563	1	0.999
Rpl26	Rpl4	5026969	5021039	10090.ENSMUSP00000073175	10090.ENSMUSP00000034966	0.139	0	0.255	0	0.927	0.82	1	0.9	1	0.685	1	0.999
Rps15a	Rpl22	5034103	5034020	10090.ENSMUSP00000119975	10090.ENSMUSP00000118787	0	0	0	0	0.913	0.971	1	0.9	1	0.291	1	0.999
Psmd7	Psmc2	5022298	5019763	10090.ENSMUSP00000041968	10090.ENSMUSP00000030769	0	0	0	0	0.825	0.896	1	0.9	1	0.819	1	0.999
Rps18	Rpl8	5016094	5015714	10090.ENSMUSP00000008812	10090.ENSMUSP00000004072	0.139	0	0	0	0.856	0.95	1	0.9	1	0.584	1	0.999
Rps15a	Rps9	5034103	5015940	10090.ENSMUSP00000119975	10090.ENSMUSP00000006496	0.172	0	0	0	0.881	0.972	1	0.9	1	0.694	1	0.999
Rpl30	Rps23	5032315	5024346	10090.ENSMUSP00000106014	10090.ENSMUSP00000054490	0.172	0	0	0	0.939	0.971	1	0.9	1	0.658	1	0.999
Rpl18	Rps14	5031793	5018277	10090.ENSMUSP00000103365	10090.ENSMUSP00000025511	0.172	0	0	0	0.911	0.969	1	0.9	1	0.576	1	0.999
Rpl30	Rps27a	5032315	5031143	10090.ENSMUSP00000106014	10090.ENSMUSP00000099909	0	0	0	0	0.934	0.896	1	0.9	1	0.305	1	0.999
Rpl22	Rps11	5034020	5015656	10090.ENSMUSP00000118787	10090.ENSMUSP00000003521	0	0	0	0	0.914	0.971	1	0.9	1	0.309	1	0.999
Rps23	Rpl10a	5024346	5023403	10090.ENSMUSP00000054490	10090.ENSMUSP00000048469	0.164	0	0	0	0.94	0.971	1	0.9	1	0.335	1	0.999
Nop58	Dkc1	5037094	5020634	10090.ENSMUSP00000140250	10090.ENSMUSP00000033776	0.112	0	0	0	0.904	0.75	1	0.72	1	0.882	1	0.999
Rps21	Rps5	5024953	5015759	10090.ENSMUSP00000058432	10090.ENSMUSP00000004554	0	0	0	0	0.951	0.896	1	0.9	1	0.644	1	0.999
Rpl22	Rpl23	5034020	5030904	10090.ENSMUSP00000118787	10090.ENSMUSP00000099435	0	0	0	0	0.935	0.971	1	0.9	1	0.253	1	0.999
Psmd6	Psmc5	5017456	5017086	10090.ENSMUSP00000022256	10090.ENSMUSP00000021049	0	0	0	0	0.828	0.812	1	0.9	1	0.815	1	0.999
Psmd7	Psmc4	5022298	5020351	10090.ENSMUSP00000041968	10090.ENSMUSP00000032824	0	0	0	0	0.807	0.896	1	0.9	1	0.817	1	0.999
Rps15a	Rpl5	5034103	5028222	10090.ENSMUSP00000119975	10090.ENSMUSP00000080854	0.193	0	0	0	0.999	0.86	1	0	0	0.572	1	0.999
Rpl7	Rpl19	5026693	5016512	10090.ENSMUSP00000071616	10090.ENSMUSP00000017548	0.164	0	0	0	0.942	0.957	1	0.9	1	0.747	1	0.999
Rpl10a	Rpl8	5023403	5015714	10090.ENSMUSP00000048469	10090.ENSMUSP00000004072	0.164	0	0	0	0.999	0.971	1	0.9	1	0.605	1	0.999
Rps7	Rps5	5027079	5015759	10090.ENSMUSP00000073880	10090.ENSMUSP00000004554	0	0	0	0	0.949	0.95	1	0.9	1	0.292	1	0.999
Rps20	Rps9	5034139	5015940	10090.ENSMUSP00000120528	10090.ENSMUSP00000006496	0.164	0	0	0	0.883	0.972	1	0.72	1	0.511	1	0.999
Psmd8	Psmd12	5023901	5017092	10090.ENSMUSP00000051657	10090.ENSMUSP00000021063	0	0	0	0	0.666	0.858	1	0.9	1	0.825	1	0.999
Rpl32	Rps23	5028158	5024346	10090.ENSMUSP00000080523	10090.ENSMUSP00000054490	0	0	0	0	0.899	0.971	1	0.9	1	0.427	1	0.999
Rps3a1	Rps9	5019462	5015940	10090.ENSMUSP00000029722	10090.ENSMUSP00000006496	0	0	0	0	0.929	0.971	1	0.9	1	0.631	1	0.999
Psmd7	Psmc1	5022298	5017247	10090.ENSMUSP00000041968	10090.ENSMUSP00000021595	0	0	0	0	0.815	0.896	1	0.9	1	0.784	1	0.999
Rpl35a	Rps28	5033146	5033019	10090.ENSMUSP00000110731	10090.ENSMUSP00000110013	0	0	0	0	0.861	0.958	1	0.9	1	0.575	1	0.999
Rpl31	Rpl37a	5036727	5025033	10090.ENSMUSP00000137631	10090.ENSMUSP00000058919	0	0	0	0	0.999	0.97	1	0.72	1	0.596	1	0.999
Rps28	Rps8	5033019	5031065	10090.ENSMUSP00000110013	10090.ENSMUSP00000099757	0	0	0	0	0.924	0.958	1	0.9	1	0.703	1	0.999
Rps24	Rps19	5034648	5031943	10090.ENSMUSP00000125977	10090.ENSMUSP00000104067	0	0	0	0	0.999	0.889	1	0.54	1	0.939	1	0.999
Rpl22	Rps7	5034020	5027079	10090.ENSMUSP00000118787	10090.ENSMUSP00000073880	0	0	0	0	0.797	0.95	1	0.9	1	0.43	1	0.999
Rps3	Rpl19	5020408	5016512	10090.ENSMUSP00000032998	10090.ENSMUSP00000017548	0.193	0	0.276	0	0.99	0.972	1	0.9	1	0.598	1	0.999
Rps23	Rps9	5024346	5015940	10090.ENSMUSP00000054490	10090.ENSMUSP00000006496	0.164	0	0	0	0.898	0.972	1	0.9	1	0.693	1	0.999
Rpl7	Rps3a1	5026693	5019462	10090.ENSMUSP00000071616	10090.ENSMUSP00000029722	0	0	0	0	0.999	0.843	1	0	0	0.701	1	0.999
Rpl30	Rpl23	5032315	5030904	10090.ENSMUSP00000106014	10090.ENSMUSP00000099435	0	0	0	0	0.938	0.971	1	0.9	1	0.362	1	0.999
Rps20	Rps10	5034139	5033114	10090.ENSMUSP00000120528	10090.ENSMUSP00000110532	0	0	0	0	0.804	0.958	1	0.72	1	0.663	1	0.999
Rpl11	Rps5	5030979	5015759	10090.ENSMUSP00000099595	10090.ENSMUSP00000004554	0.139	0	0	0	0.856	0.95	1	0.9	1	0.653	1	0.999
Rps26	Rps11	5018537	5015656	10090.ENSMUSP00000026420	10090.ENSMUSP00000003521	0	0	0	0	0.945	0.958	1	0.72	1	0.33	1	0.999
Rpl37a	Rps9	5025033	5015940	10090.ENSMUSP00000058919	10090.ENSMUSP00000006496	0	0	0	0	0.901	0.97	1	0.9	1	0.329	1	0.999
Ndufv2	Ndufv1	5034213	5022440	10090.ENSMUSP00000121557	10090.ENSMUSP00000042967	0.193	0.524	0.448	0	0.837	0.962	1	0.9	1	0.899	1	0.999
Rpl35a	Rpl37a	5033146	5025033	10090.ENSMUSP00000110731	10090.ENSMUSP00000058919	0	0	0	0	0.936	0.97	1	0.9	1	0.67	1	0.999
Rpl14	Rps8	5035620	5031065	10090.ENSMUSP00000131489	10090.ENSMUSP00000099757	0	0	0	0	0.922	0.85	1	0.9	1	0.768	1	0.999
Rps19	Rpl5	5031943	5028222	10090.ENSMUSP00000104067	10090.ENSMUSP00000080854	0	0	0	0	0.999	0.86	1	0	0	0.933	1	0.999
Rps2	Rps14	5029538	5018277	10090.ENSMUSP00000092502	10090.ENSMUSP00000025511	0.091	0	0.267	0	0.686	0.938	1	0.9	1	0.56	1	0.999
Rps10	Rps11	5033114	5015656	10090.ENSMUSP00000110532	10090.ENSMUSP00000003521	0	0	0	0	0.891	0.958	1	0.72	1	0.611	1	0.999
Psmd13	Psmd3	5018587	5016500	10090.ENSMUSP00000026560	10090.ENSMUSP00000017365	0	0	0	0	0.814	0.797	1	0.9	1	0.853	1	0.999
Ndufv1	Ndufs3	5022440	5015856	10090.ENSMUSP00000042967	10090.ENSMUSP00000005647	0.193	0	0.315	0	0.878	0.961	1	0.9	1	0.851	1	0.999
Rps6	Rps7	5031125	5027079	10090.ENSMUSP00000099878	10090.ENSMUSP00000073880	0	0	0	0	0.857	0.95	1	0.9	1	0.429	1	0.999
Rps15a	Rpl37a	5034103	5025033	10090.ENSMUSP00000119975	10090.ENSMUSP00000058919	0	0	0	0	0.999	0.97	1	0.9	1	0.123	1	0.999
Rps27a	Rpl32	5031143	5028158	10090.ENSMUSP00000099909	10090.ENSMUSP00000080523	0	0	0	0	0.91	0.895	1	0.9	1	0.397	1	0.999
Rps28	Rpl37a	5033019	5025033	10090.ENSMUSP00000110013	10090.ENSMUSP00000058919	0	0	0.261	0	0.934	0.958	1	0.9	1	0.32	1	0.999
Ndufa6	Ndufb9	5017711	5017677	10090.ENSMUSP00000023085	10090.ENSMUSP00000022980	0	0	0	0	0.911	0.97	1	0.9	1	0.677	1	0.999
Rps21	Rps9	5024953	5015940	10090.ENSMUSP00000058432	10090.ENSMUSP00000006496	0	0	0	0	0.923	0.889	1	0.9	1	0.346	1	0.999
Ndufa9	Ndufv1	5028727	5022440	10090.ENSMUSP00000085523	10090.ENSMUSP00000042967	0	0	0	0	0.896	0.958	1	0.9	1	0.716	1	0.999
Rpl31	Rpl26	5036727	5026969	10090.ENSMUSP00000137631	10090.ENSMUSP00000073175	0	0	0	0	0.999	0.971	1	0.72	1	0.828	1	0.999
Rpl14	Rps5	5035620	5015759	10090.ENSMUSP00000131489	10090.ENSMUSP00000004554	0.096	0	0	0	0.882	0.858	1	0.9	1	0.479	1	0.999
Rps27a	Rps3	5031143	5020408	10090.ENSMUSP00000099909	10090.ENSMUSP00000032998	0	0	0	0	0.887	0.896	1	0.9	1	0.394	1	0.999
Rpl22	Rps21	5034020	5024953	10090.ENSMUSP00000118787	10090.ENSMUSP00000058432	0	0	0	0	0.927	0.896	1	0.9	1	0.367	1	0.999
Rps13	Rps5	5034698	5015759	10090.ENSMUSP00000126294	10090.ENSMUSP00000004554	0.042	0	0	0	0.915	0.972	1	0.9	1	0.692	1	0.999
Psmd7	Psmd12	5022298	5017092	10090.ENSMUSP00000041968	10090.ENSMUSP00000021063	0	0	0	0	0.822	0.892	1	0.9	1	0.884	1	0.999
Rpl3	Rpl6	5028126	5020043	10090.ENSMUSP00000080354	10090.ENSMUSP00000031617	0.088	0	0	0	0.857	0.795	1	0.9	1	0.733	1	0.999
Ndufs8	Ndufb10	5027191	5022532	10090.ENSMUSP00000074600	10090.ENSMUSP00000043543	0	0	0	0	0.863	0.902	1	0.9	1	0.686	1	0.999
Ndufs8	Cyc1	5027191	5017751	10090.ENSMUSP00000074600	10090.ENSMUSP00000023210	0	0	0	0	0.937	0.82	1	0.9	1	0.27	1	0.999
Ndufa8	Ndufs3	5025925	5015856	10090.ENSMUSP00000065352	10090.ENSMUSP00000005647	0	0	0	0	0.939	0.955	1	0.9	1	0.462	1	0.999
Rps17	Rps21	5028013	5024953	10090.ENSMUSP00000079628	10090.ENSMUSP00000058432	0	0	0	0	0.947	0.896	1	0.72	1	0.682	1	0.999
Rpl14	Rpl35a	5035620	5033146	10090.ENSMUSP00000131489	10090.ENSMUSP00000110731	0	0	0	0	0.917	0.82	1	0.9	1	0.757	1	0.999
Rpl37	Rpl19	5023036	5016512	10090.ENSMUSP00000046506	10090.ENSMUSP00000017548	0	0	0	0	0.825	0.971	1	0.9	1	0.489	1	0.999
Rpl32	Rps21	5028158	5024953	10090.ENSMUSP00000080523	10090.ENSMUSP00000058432	0	0	0	0	0.954	0.896	1	0.9	1	0.112	1	0.999
Rpl36	Rps3a1	5027972	5019462	10090.ENSMUSP00000079340	10090.ENSMUSP00000029722	0	0	0	0	0.734	0.95	1	0.9	1	0.412	1	0.999
Rps27	Rpl35a	5035720	5033146	10090.ENSMUSP00000132102	10090.ENSMUSP00000110731	0	0	0	0	0.855	0.958	1	0.9	1	0.593	1	0.999
Rps27	Rpl11	5035720	5030979	10090.ENSMUSP00000132102	10090.ENSMUSP00000099595	0	0	0	0	0.776	0.939	1	0.9	1	0.75	1	0.999
Rpl35a	Rpl18	5033146	5031793	10090.ENSMUSP00000110731	10090.ENSMUSP00000103365	0	0	0	0	0.908	0.869	1	0.9	1	0.506	1	0.999
Rpl36a	Rpl32	5032811	5028158	10090.ENSMUSP00000108837	10090.ENSMUSP00000080523	0	0	0	0	0.944	0.958	1	0.72	1	0.225	1	0.999
Ndufa9	Uqcrc2	5028727	5020466	10090.ENSMUSP00000085523	10090.ENSMUSP00000033176	0	0	0	0	0.882	0.784	1	0.9	1	0.864	1	0.999
Rpl7	Rpl4	5026693	5021039	10090.ENSMUSP00000071616	10090.ENSMUSP00000034966	0.098	0	0	0	0.935	0.818	1	0.72	1	0.788	1	0.999
Rps25	Rps3	5027947	5020408	10090.ENSMUSP00000079180	10090.ENSMUSP00000032998	0	0	0	0	0.951	0.971	1	0.9	1	0.735	1	0.999
Rps21	Rps23	5024953	5024346	10090.ENSMUSP00000058432	10090.ENSMUSP00000054490	0	0	0	0	0.909	0.896	1	0.9	1	0.631	1	0.999
Rpl5	Rpl3	5028222	5028126	10090.ENSMUSP00000080854	10090.ENSMUSP00000080354	0.17	0	0	0	0.999	0.854	1	0.72	1	0.792	1	0.999
Rps19	Rps3	5031943	5020408	10090.ENSMUSP00000104067	10090.ENSMUSP00000032998	0	0	0	0	0.963	0.889	1	0.9	1	0.76	1	0.999
Ndufs7	Ndufs4	5031381	5017465	10090.ENSMUSP00000101003	10090.ENSMUSP00000022286	0	0	0	0	0.737	0.944	1	0.9	1	0.794	1	0.999
Rpl31	Rpl36a	5036727	5032811	10090.ENSMUSP00000137631	10090.ENSMUSP00000108837	0	0	0	0	0.862	0.958	1	0.72	1	0.56	1	0.999
Rpl32	Rpl37	5028158	5023036	10090.ENSMUSP00000080523	10090.ENSMUSP00000046506	0	0	0	0	0.861	0.971	1	0.9	1	0.445	1	0.999
Rps3a1	Rps14	5019462	5018277	10090.ENSMUSP00000029722	10090.ENSMUSP00000025511	0	0	0.218	0	0.936	0.97	1	0.9	1	0.781	1	0.999
Rps13	Rpl10a	5034698	5023403	10090.ENSMUSP00000126294	10090.ENSMUSP00000048469	0.042	0	0	0	0.981	0.971	1	0.9	1	0.531	1	0.999
Rps25	Rps23	5027947	5024346	10090.ENSMUSP00000079180	10090.ENSMUSP00000054490	0	0	0	0	0.918	0.971	1	0.9	1	0.729	1	0.999
Rps13	Rpl35a	5034698	5033146	10090.ENSMUSP00000126294	10090.ENSMUSP00000110731	0	0	0	0	0.999	0.971	1	0.9	1	0.439	1	0.999
Rps28	Rpl37	5033019	5023036	10090.ENSMUSP00000110013	10090.ENSMUSP00000046506	0	0	0	0	0.801	0.958	1	0.9	1	0.584	1	0.999
Rps21	Rps14	5024953	5018277	10090.ENSMUSP00000058432	10090.ENSMUSP00000025511	0	0	0	0	0.958	0.889	1	0.9	1	0.686	1	0.999
Rps20	Rps25	5034139	5027947	10090.ENSMUSP00000120528	10090.ENSMUSP00000079180	0	0	0	0	0.933	0.972	1	0.72	1	0.813	1	0.999
Rps19	Rps16	5031943	5031918	10090.ENSMUSP00000104067	10090.ENSMUSP00000103940	0	0	0	0	0.927	0.896	1	0.54	1	0.762	1	0.999
Rpl31	Rpl39	5036727	5033187	10090.ENSMUSP00000137631	10090.ENSMUSP00000110886	0	0	0	0	0.881	0.97	1	0.72	1	0.701	1	0.999
Rps19	Rpl37	5031943	5023036	10090.ENSMUSP00000104067	10090.ENSMUSP00000046506	0	0	0	0	0.83	0.891	1	0.9	1	0.696	1	0.999
Rps28	Rps19	5033019	5031943	10090.ENSMUSP00000110013	10090.ENSMUSP00000104067	0	0	0	0	0.869	0.801	1	0.9	1	0.674	1	0.999
Rpl30	Rpl32	5032315	5028158	10090.ENSMUSP00000106014	10090.ENSMUSP00000080523	0	0	0	0	0.908	0.971	1	0.9	1	0.741	1	0.999
Rpl27	Rpl26	5029225	5026969	10090.ENSMUSP00000090305	10090.ENSMUSP00000073175	0.107	0	0	0	0.936	0.958	1	0.72	1	0.692	1	0.999
Rpl22	Rpl10a	5034020	5023403	10090.ENSMUSP00000118787	10090.ENSMUSP00000048469	0	0	0	0	0.876	0.971	1	0.9	1	0.725	1	0.999
Rpl31	Rpl19	5036727	5016512	10090.ENSMUSP00000137631	10090.ENSMUSP00000017548	0	0	0	0	0.891	0.97	1	0.72	1	0.785	1	0.999
Rps27a	Rpl19	5031143	5016512	10090.ENSMUSP00000099909	10090.ENSMUSP00000017548	0	0	0	0	0.937	0.896	1	0.9	1	0.321	1	0.999
Rps13	Rps18	5034698	5016094	10090.ENSMUSP00000126294	10090.ENSMUSP00000008812	0.042	0	0	0	0.793	0.95	1	0.9	1	0.593	1	0.999
Rpl22	Rps9	5034020	5015940	10090.ENSMUSP00000118787	10090.ENSMUSP00000006496	0	0	0	0	0.822	0.971	1	0.9	1	0.755	1	0.999
Ndufa9	Ndufa10	5028727	5018820	10090.ENSMUSP00000085523	10090.ENSMUSP00000027478	0	0	0	0	0.78	0.958	1	0.9	1	0.542	1	0.999
Rps15a	Rpl36	5034103	5027972	10090.ENSMUSP00000119975	10090.ENSMUSP00000079340	0	0	0	0	0.771	0.95	1	0.9	1	0.537	1	0.999
Rps3	Rps9	5020408	5015940	10090.ENSMUSP00000032998	10090.ENSMUSP00000006496	0.172	0	0	0	0.991	0.972	1	0.9	1	0.714	1	0.999
Rps28	Rpl26	5033019	5026969	10090.ENSMUSP00000110013	10090.ENSMUSP00000073175	0	0	0	0	0.941	0.958	1	0.9	1	0.615	1	0.999
Rps8	Rps5	5031065	5015759	10090.ENSMUSP00000099757	10090.ENSMUSP00000004554	0	0	0	0	0.957	0.971	1	0.9	1	0.709	1	0.999
Rps24	Rps29	5034648	5021660	10090.ENSMUSP00000125977	10090.ENSMUSP00000038352	0	0	0	0	0.831	0.958	1	0.72	1	0.776	1	0.999
Rpl15	Rpl37a	5027943	5025033	10090.ENSMUSP00000079163	10090.ENSMUSP00000058919	0.172	0	0	0	0.864	0.958	1	0.72	1	0.447	1	0.999
Rpl18	Rpl11	5031793	5030979	10090.ENSMUSP00000103365	10090.ENSMUSP00000099595	0	0	0	0	0.849	0.947	1	0.9	1	0.591	1	0.999
Rpl35a	Rps11	5033146	5015656	10090.ENSMUSP00000110731	10090.ENSMUSP00000003521	0	0	0	0	0.999	0.971	1	0.9	1	0.619	1	0.999
Psmd8	Psmc4	5023901	5020351	10090.ENSMUSP00000051657	10090.ENSMUSP00000032824	0	0	0	0	0.823	0.896	1	0.9	1	0.719	1	0.999
Rps28	Rpl32	5033019	5028158	10090.ENSMUSP00000110013	10090.ENSMUSP00000080523	0	0	0	0	0.913	0.958	1	0.9	1	0.477	1	0.999
Psmd1	Psmd3	5018807	5016500	10090.ENSMUSP00000027432	10090.ENSMUSP00000017365	0	0	0	0	0.803	0.817	1	0.9	1	0.857	1	0.999
Ndufa10	Ndufs2	5018820	5016267	10090.ENSMUSP00000027478	10090.ENSMUSP00000013737	0	0	0	0	0.811	0.951	1	0.9	1	0.676	1	0.999
Ndufb9	Ndufs3	5017677	5015856	10090.ENSMUSP00000022980	10090.ENSMUSP00000005647	0	0	0	0	0.861	0.952	1	0.9	1	0.408	1	0.999
Rps6	Rpl10a	5031125	5023403	10090.ENSMUSP00000099878	10090.ENSMUSP00000048469	0	0	0	0	0.999	0.971	1	0.9	1	0.507	1	0.999
Rpl7	Rps14	5026693	5018277	10090.ENSMUSP00000071616	10090.ENSMUSP00000025511	0.119	0	0	0	0.999	0.958	1	0	0	0.737	1	0.999
Rps27	Rpl19	5035720	5016512	10090.ENSMUSP00000132102	10090.ENSMUSP00000017548	0	0	0	0	0.871	0.958	1	0.9	1	0.708	1	0.999
Rps20	Rpl35a	5034139	5033146	10090.ENSMUSP00000120528	10090.ENSMUSP00000110731	0	0	0	0	0.999	0.97	1	0	0	0.752	1	0.999
Rpl37	Rps9	5023036	5015940	10090.ENSMUSP00000046506	10090.ENSMUSP00000006496	0	0	0	0	0.824	0.972	1	0.9	1	0.45	1	0.999
Psmd6	Psmd11	5017456	5016515	10090.ENSMUSP00000022256	10090.ENSMUSP00000017572	0	0	0	0	0.813	0.805	1	0.9	1	0.853	1	0.999
Rps28	Rpl36	5033019	5027972	10090.ENSMUSP00000110013	10090.ENSMUSP00000079340	0	0	0	0	0.891	0.939	1	0.9	1	0.39	1	0.999
Rps13	Rpl22	5034698	5034020	10090.ENSMUSP00000126294	10090.ENSMUSP00000118787	0	0	0	0	0.818	0.971	1	0.9	1	0.803	1	0.999
Rpl18	Rps6	5031793	5031125	10090.ENSMUSP00000103365	10090.ENSMUSP00000099878	0	0	0	0	0.934	0.854	1	0.9	1	0.651	1	0.999
Psmd14	Psmd11	5019035	5016515	10090.ENSMUSP00000028278	10090.ENSMUSP00000017572	0	0	0	0	0.813	0.896	1	0.9	1	0.855	1	0.999
Cops5	Cops6	5018696	5016737	10090.ENSMUSP00000027050	10090.ENSMUSP00000019638	0	0	0	0	0.513	0.895	1	0.9	1	0.901	1	0.999
Ndufb9	Ndufs4	5017677	5017465	10090.ENSMUSP00000022980	10090.ENSMUSP00000022286	0	0	0	0	0.881	0.917	1	0.9	1	0.484	1	0.999
Rps17	Rps3	5028013	5020408	10090.ENSMUSP00000079628	10090.ENSMUSP00000032998	0	0	0	0	0.91	0.972	1	0.72	1	0.724	1	0.999
Rpl30	Rpl3	5032315	5028126	10090.ENSMUSP00000106014	10090.ENSMUSP00000080354	0	0	0	0	0.916	0.858	1	0.9	1	0.706	1	0.999
Psmc4	Psmd6	5020351	5017456	10090.ENSMUSP00000032824	10090.ENSMUSP00000022256	0	0	0	0	0.835	0.812	1	0.9	1	0.835	1	0.999
Rps25	Rps9	5027947	5015940	10090.ENSMUSP00000079180	10090.ENSMUSP00000006496	0	0	0	0	0.883	0.971	1	0.9	1	0.543	1	0.999
Rpl18	Rpl8	5031793	5015714	10090.ENSMUSP00000103365	10090.ENSMUSP00000004072	0	0	0	0	0.967	0.97	1	0.9	1	0.693	1	0.999
Psmc6	Psmc1	5017492	5017247	10090.ENSMUSP00000022380	10090.ENSMUSP00000021595	0	0	0.423	0.906	0.811	0.971	1	0.9	1	0.82	1	0.999
Rpl30	Rpl38	5032315	5031605	10090.ENSMUSP00000106014	10090.ENSMUSP00000102213	0	0	0	0	0.909	0.896	1	0.9	1	0.75	1	0.999
Psmd8	Psmd3	5023901	5016500	10090.ENSMUSP00000051657	10090.ENSMUSP00000017365	0	0	0	0	0.787	0.877	1	0.9	1	0.785	1	0.999
Rpl35a	Rps25	5033146	5027947	10090.ENSMUSP00000110731	10090.ENSMUSP00000079180	0	0	0	0	0.999	0.971	1	0.9	1	0.379	1	0.999
Rpl35a	Rps21	5033146	5024953	10090.ENSMUSP00000110731	10090.ENSMUSP00000058432	0	0	0	0	0.942	0.896	1	0.9	1	0.408	1	0.999
Rps13	Rps8	5034698	5031065	10090.ENSMUSP00000126294	10090.ENSMUSP00000099757	0	0	0	0	0.912	0.971	1	0.9	1	0.833	1	0.999
Rpl30	Rps8	5032315	5031065	10090.ENSMUSP00000106014	10090.ENSMUSP00000099757	0	0	0	0	0.941	0.971	1	0.9	1	0.447	1	0.999
Rpl23	Rpl7	5030904	5026693	10090.ENSMUSP00000099435	10090.ENSMUSP00000071616	0.164	0	0	0	0.999	0.962	1	0.72	1	0.225	1	0.999
Rpl10a	Rps14	5023403	5018277	10090.ENSMUSP00000048469	10090.ENSMUSP00000025511	0.164	0	0	0	0.942	0.97	1	0.9	1	0.63	1	0.999
Rpl23	Rpl36	5030904	5027972	10090.ENSMUSP00000099435	10090.ENSMUSP00000079340	0	0	0	0	0.799	0.95	1	0.9	1	0.372	1	0.999
Rpl18	Rpl10a	5031793	5023403	10090.ENSMUSP00000103365	10090.ENSMUSP00000048469	0	0	0	0	0.936	0.881	1	0.9	1	0.455	1	0.999
Rps17	Rpl37a	5028013	5025033	10090.ENSMUSP00000079628	10090.ENSMUSP00000058919	0	0	0.249	0	0.935	0.97	1	0	0	0.553	1	0.999
Rpl5	Rps3a1	5028222	5019462	10090.ENSMUSP00000080854	10090.ENSMUSP00000029722	0	0	0	0	0.999	0.855	1	0	0	0.815	1	0.999
Rps27	Rps18	5035720	5016094	10090.ENSMUSP00000132102	10090.ENSMUSP00000008812	0	0	0	0	0.766	0.939	1	0.9	1	0.452	1	0.999
Rpl35a	Rps19	5033146	5031943	10090.ENSMUSP00000110731	10090.ENSMUSP00000104067	0	0	0	0	0.896	0.896	1	0.9	1	0.931	1	0.999
Rps8	Rpl19	5031065	5016512	10090.ENSMUSP00000099757	10090.ENSMUSP00000017548	0	0	0	0	0.999	0.971	1	0.9	1	0.785	1	0.999
Rpl37	Rpl8	5023036	5015714	10090.ENSMUSP00000046506	10090.ENSMUSP00000004072	0	0	0	0	0.824	0.972	1	0.9	1	0.589	1	0.999
Rps28	Rpl38	5033019	5031605	10090.ENSMUSP00000110013	10090.ENSMUSP00000102213	0	0	0	0	0.93	0.801	1	0.9	1	0.759	1	0.999
Rps21	Rps3	5024953	5020408	10090.ENSMUSP00000058432	10090.ENSMUSP00000032998	0	0	0	0	0.929	0.889	1	0.9	1	0.325	1	0.999
Rpl35a	Rpl27-ps3	5033146	5029953	10090.ENSMUSP00000110731	10090.ENSMUSP00000095287	0	0	0	0	0.814	0.958	1	0.72	1	0.689	1	0.999
Rps29	Rpl19	5021660	5016512	10090.ENSMUSP00000038352	10090.ENSMUSP00000017548	0.17	0	0	0	0.92	0.969	1	0.72	1	0.618	1	0.999
Rps8	Rps11	5031065	5015656	10090.ENSMUSP00000099757	10090.ENSMUSP00000003521	0	0	0	0	0.995	0.971	1	0.9	1	0.793	1	0.999
Rps13	Rps15a	5034698	5034103	10090.ENSMUSP00000126294	10090.ENSMUSP00000119975	0	0	0	0	0.944	0.972	1	0.9	1	0.464	1	0.999
Rps8	Rpl8	5031065	5015714	10090.ENSMUSP00000099757	10090.ENSMUSP00000004072	0	0	0	0	0.986	0.971	1	0.9	1	0.719	1	0.999
Rps7	Rps14	5027079	5018277	10090.ENSMUSP00000073880	10090.ENSMUSP00000025511	0	0	0	0	0.897	0.95	1	0.9	1	0.483	1	0.999
Rpl31	Rpl22	5036727	5034020	10090.ENSMUSP00000137631	10090.ENSMUSP00000118787	0	0	0	0	0.841	0.97	1	0.72	1	0.702	1	0.999
Rpl22	Rpl18	5034020	5031793	10090.ENSMUSP00000118787	10090.ENSMUSP00000103365	0	0	0	0	0.843	0.856	1	0.9	1	0.713	1	0.999
Ndufa8	Ndufb10	5025925	5022532	10090.ENSMUSP00000065352	10090.ENSMUSP00000043543	0	0	0	0	0.909	0.932	1	0.9	1	0.59	1	0.999
Psmc2	Psmc1	5019763	5017247	10090.ENSMUSP00000030769	10090.ENSMUSP00000021595	0	0	0.329	0.894	0.885	0.972	1	0.9	1	0.843	1	0.999
Rpl15	Rpl26	5027943	5026969	10090.ENSMUSP00000079163	10090.ENSMUSP00000073175	0	0	0.342	0	0.878	0.958	1	0.72	1	0.759	1	0.999
Rps13	Rpl11	5034698	5030979	10090.ENSMUSP00000126294	10090.ENSMUSP00000099595	0	0	0	0	0.798	0.95	1	0.9	1	0.592	1	0.999
Ndufa6	Ndufs2	5017711	5016267	10090.ENSMUSP00000023085	10090.ENSMUSP00000013737	0	0	0	0	0.257	0.97	1	0.9	1	0.667	1	0.999
Rpl34	Rpl26	5028844	5026969	10090.ENSMUSP00000086614	10090.ENSMUSP00000073175	0.164	0	0	0	0.943	0.801	1	0.9	1	0.547	1	0.999
Psmd13	Psmd12	5018587	5017092	10090.ENSMUSP00000026560	10090.ENSMUSP00000021063	0	0	0	0	0.812	0.799	1	0.9	1	0.825	1	0.999
Rpl36al	Rpl23	5032361	5030904	10090.ENSMUSP00000106249	10090.ENSMUSP00000099435	0	0	0	0	0.86	0.958	1	0.72	1	0.571	1	0.999
Ndufa13	Ndufa9	5032274	5028727	10090.ENSMUSP00000105796	10090.ENSMUSP00000085523	0	0	0	0	0.811	0.946	1	0.9	1	0.329	1	0.999
Rpl39	Rpl19	5033187	5016512	10090.ENSMUSP00000110886	10090.ENSMUSP00000017548	0	0	0	0	0.885	0.971	1	0.72	1	0.698	1	0.999
Rps24	Rps11	5034648	5015656	10090.ENSMUSP00000125977	10090.ENSMUSP00000003521	0	0	0	0	0.999	0.97	1	0.72	1	0.793	1	0.999
Rps24	Rpl19	5034648	5016512	10090.ENSMUSP00000125977	10090.ENSMUSP00000017548	0	0	0	0	0.909	0.97	1	0	0	0.738	1	0.999
Rps27	Rps3	5035720	5020408	10090.ENSMUSP00000132102	10090.ENSMUSP00000032998	0	0	0	0	0.825	0.958	1	0.9	1	0.614	1	0.999
Rpl35a	Rpl23	5033146	5030904	10090.ENSMUSP00000110731	10090.ENSMUSP00000099435	0	0	0	0	0.999	0.971	1	0.9	1	0.356	1	0.999
Rpl5	Rpl7	5028222	5026693	10090.ENSMUSP00000080854	10090.ENSMUSP00000071616	0.164	0	0	0	0.999	0.821	1	0.72	1	0.793	1	0.999
Rps27	Rpl37	5035720	5023036	10090.ENSMUSP00000132102	10090.ENSMUSP00000046506	0	0	0	0	0.736	0.958	1	0.9	1	0.747	1	0.999
Psmc6	Psmd12	5017492	5017092	10090.ENSMUSP00000022380	10090.ENSMUSP00000021063	0	0	0	0	0.877	0.882	1	0.9	1	0.855	1	0.999
Rpl27	Rpl32	5029225	5028158	10090.ENSMUSP00000090305	10090.ENSMUSP00000080523	0.097	0	0	0	0.925	0.958	1	0.72	1	0.275	1	0.999
Rps6	Rps9	5031125	5015940	10090.ENSMUSP00000099878	10090.ENSMUSP00000006496	0	0	0	0	0.884	0.971	1	0.9	1	0.683	1	0.999
Rpl39	Rpl32	5033187	5028158	10090.ENSMUSP00000110886	10090.ENSMUSP00000080523	0	0	0	0	0.909	0.97	1	0.72	1	0.309	1	0.999
Rpl31	Rpl5	5036727	5028222	10090.ENSMUSP00000137631	10090.ENSMUSP00000080854	0	0	0	0	0.912	0.818	1	0.72	1	0.84	1	0.999
Rpl22	Rpl11	5034020	5030979	10090.ENSMUSP00000118787	10090.ENSMUSP00000099595	0	0	0	0	0.757	0.95	1	0.9	1	0.68	1	0.999
Rpl37a	Rps3	5025033	5020408	10090.ENSMUSP00000058919	10090.ENSMUSP00000032998	0	0	0	0	0.939	0.97	1	0.9	1	0.45	1	0.999
Rpl37	Rps5	5023036	5015759	10090.ENSMUSP00000046506	10090.ENSMUSP00000004554	0	0	0	0	0.823	0.972	1	0.9	1	0.401	1	0.999
Rpl38	Rps11	5031605	5015656	10090.ENSMUSP00000102213	10090.ENSMUSP00000003521	0	0	0	0	0.962	0.896	1	0.9	1	0.465	1	0.999
Rps6	Rpl8	5031125	5015714	10090.ENSMUSP00000099878	10090.ENSMUSP00000004072	0	0	0	0	0.96	0.971	1	0.9	1	0.428	1	0.999
Ndufv1	Ndufa6	5022440	5017711	10090.ENSMUSP00000042967	10090.ENSMUSP00000023085	0	0	0	0	0.285	0.97	1	0.9	1	0.636	1	0.999
Rpl35a	Rpl19	5033146	5016512	10090.ENSMUSP00000110731	10090.ENSMUSP00000017548	0	0	0	0	0.939	0.971	1	0.9	1	0.603	1	0.999
Rps25	Rpl7	5027947	5026693	10090.ENSMUSP00000079180	10090.ENSMUSP00000071616	0	0	0	0	0.999	0.846	1	0	0	0.653	1	0.999
Ndufb8	Ndufa6	5018490	5017711	10090.ENSMUSP00000026222	10090.ENSMUSP00000023085	0	0	0	0	0.898	0.97	1	0.9	1	0.617	1	0.999
Psmc4	Psmd1	5020351	5018807	10090.ENSMUSP00000032824	10090.ENSMUSP00000027432	0	0	0	0	0.719	0.82	1	0.9	1	0.857	1	0.999
Rpl23	Rps18	5030904	5016094	10090.ENSMUSP00000099435	10090.ENSMUSP00000008812	0.17	0	0	0	0.816	0.95	1	0.9	1	0.414	1	0.999
Rpl31	Rpl35a	5036727	5033146	10090.ENSMUSP00000137631	10090.ENSMUSP00000110731	0	0	0	0	0.935	0.97	1	0.72	1	0.806	1	0.999
Iars	Eprs	5035714	5022939	10090.ENSMUSP00000132082	10090.ENSMUSP00000045841	0.07	0	0	0	0.999	0.818	1	0.72	1	0.849	1	0.999
Rpl30	Rps25	5032315	5027947	10090.ENSMUSP00000106014	10090.ENSMUSP00000079180	0	0	0	0	0.933	0.971	1	0.9	1	0.675	1	0.999
Rpl10a	Rps11	5023403	5015656	10090.ENSMUSP00000048469	10090.ENSMUSP00000003521	0.172	0	0	0	0.999	0.971	1	0.9	1	0.356	1	0.999
Ndufa12	Ndufs8	5036277	5027191	10090.ENSMUSP00000136313	10090.ENSMUSP00000074600	0	0	0	0	0.843	0.947	1	0.9	1	0.373	1	0.999
Rpl38	Rpl5	5031605	5028222	10090.ENSMUSP00000102213	10090.ENSMUSP00000080854	0	0	0	0	0.881	0.869	1	0.72	1	0.82	1	0.999
Rpl7	Rps11	5026693	5015656	10090.ENSMUSP00000071616	10090.ENSMUSP00000003521	0.164	0	0	0	0.999	0.96	1	0	0	0.363	1	0.999
Rps25	Rps5	5027947	5015759	10090.ENSMUSP00000079180	10090.ENSMUSP00000004554	0	0	0	0	0.96	0.971	1	0.9	1	0.757	1	0.999
Rps23	Rps14	5024346	5018277	10090.ENSMUSP00000054490	10090.ENSMUSP00000025511	0.164	0	0	0	0.918	0.971	1	0.9	1	0.739	1	0.999
Rps13	Rpl37	5034698	5023036	10090.ENSMUSP00000126294	10090.ENSMUSP00000046506	0	0	0	0	0.828	0.972	1	0.9	1	0.386	1	0.999
Rps27a	Rps11	5031143	5015656	10090.ENSMUSP00000099909	10090.ENSMUSP00000003521	0	0	0	0	0.938	0.896	1	0.9	1	0.052	1	0.999
Rpl14	Rpl26	5035620	5026969	10090.ENSMUSP00000131489	10090.ENSMUSP00000073175	0.107	0	0	0	0.912	0.853	1	0.9	1	0.669	1	0.999
Rpl18	Rpl38	5031793	5031605	10090.ENSMUSP00000103365	10090.ENSMUSP00000102213	0	0	0	0	0.909	0.883	1	0.9	1	0.364	1	0.999
Rps23	Rpl8	5024346	5015714	10090.ENSMUSP00000054490	10090.ENSMUSP00000004072	0.164	0	0	0	0.959	0.972	1	0.9	1	0.803	1	0.999
Psmc1	Psmd11	5017247	5016515	10090.ENSMUSP00000021595	10090.ENSMUSP00000017572	0	0	0	0	0.759	0.896	1	0.9	1	0.775	1	0.999
Rpl30	Rps29	5032315	5021660	10090.ENSMUSP00000106014	10090.ENSMUSP00000038352	0	0	0	0	0.833	0.971	1	0.72	1	0.505	1	0.999
Rps24	Rps15a	5034648	5034103	10090.ENSMUSP00000125977	10090.ENSMUSP00000119975	0	0	0	0	0.999	0.97	1	0.72	1	0.625	1	0.999
Rps20	Rps5	5034139	5015759	10090.ENSMUSP00000120528	10090.ENSMUSP00000004554	0.164	0	0	0	0.904	0.972	1	0.72	1	0.681	1	0.999
Rpl39	Rpl36a	5033187	5032811	10090.ENSMUSP00000110886	10090.ENSMUSP00000108837	0	0	0	0	0.862	0.958	1	0.72	1	0.841	1	0.999
Rpl32	Rpl36	5028158	5027972	10090.ENSMUSP00000080523	10090.ENSMUSP00000079340	0	0	0	0	0.896	0.95	1	0.9	1	0.337	1	0.999
Rpl35a	Rpl5	5033146	5028222	10090.ENSMUSP00000110731	10090.ENSMUSP00000080854	0	0	0	0	0.916	0.834	1	0.72	1	0.883	1	0.999
Rpl14	Rpl22	5035620	5034020	10090.ENSMUSP00000131489	10090.ENSMUSP00000118787	0	0	0	0	0.83	0.856	1	0.9	1	0.674	1	0.999
Rps25	Rps3a1	5027947	5019462	10090.ENSMUSP00000079180	10090.ENSMUSP00000029722	0	0	0	0	0.999	0.971	1	0.9	1	0.743	1	0.999
Rps13	Rps16	5034698	5031918	10090.ENSMUSP00000126294	10090.ENSMUSP00000103940	0	0	0	0	0.916	0.971	1	0.72	1	0.668	1	0.999
Rps19	Rps17	5031943	5028013	10090.ENSMUSP00000104067	10090.ENSMUSP00000079628	0	0	0	0	0.892	0.893	1	0.54	1	0.933	1	0.999
Rpl38	Rpl37a	5031605	5025033	10090.ENSMUSP00000102213	10090.ENSMUSP00000058919	0	0	0	0	0.949	0.889	1	0.9	1	0.556	1	0.999
Rps27	Rps28	5035720	5033019	10090.ENSMUSP00000132102	10090.ENSMUSP00000110013	0	0	0	0	0.713	0.945	1	0.9	1	0.719	1	0.999
Psmc2	Psmd6	5019763	5017456	10090.ENSMUSP00000030769	10090.ENSMUSP00000022256	0	0	0	0	0.933	0.799	1	0.9	1	0.764	1	0.999
Rps27	Rpl10a	5035720	5023403	10090.ENSMUSP00000132102	10090.ENSMUSP00000048469	0	0	0	0	0.83	0.958	1	0.9	1	0.438	1	0.999
Rps8	Rps14	5031065	5018277	10090.ENSMUSP00000099757	10090.ENSMUSP00000025511	0	0	0	0	0.944	0.97	1	0.9	1	0.804	1	0.999
Rps28	Rps17	5033019	5028013	10090.ENSMUSP00000110013	10090.ENSMUSP00000079628	0	0	0	0	0.93	0.958	1	0.72	1	0.648	1	0.999
Rpl22	Rpl36	5034020	5027972	10090.ENSMUSP00000118787	10090.ENSMUSP00000079340	0	0	0	0	0.736	0.95	1	0.9	1	0.323	1	0.999
Rpl39	Rps23	5033187	5024346	10090.ENSMUSP00000110886	10090.ENSMUSP00000054490	0.044	0	0	0	0.861	0.971	1	0.72	1	0.481	1	0.999
Rpl23	Rpl15	5030904	5027943	10090.ENSMUSP00000099435	10090.ENSMUSP00000079163	0	0	0.231	0	0.908	0.958	1	0.72	1	0	0	0.999
Rps17	Rps5	5028013	5015759	10090.ENSMUSP00000079628	10090.ENSMUSP00000004554	0	0	0	0	0.948	0.972	1	0.72	1	0.651	1	0.999
Rpl18	Rps3	5031793	5020408	10090.ENSMUSP00000103365	10090.ENSMUSP00000032998	0	0	0	0	0.938	0.829	1	0.9	1	0.651	1	0.999
Rps20	Rps8	5034139	5031065	10090.ENSMUSP00000120528	10090.ENSMUSP00000099757	0	0	0	0	0.999	0.97	1	0.72	1	0.552	1	0.999
Rpl36al	Rpl26	5032361	5026969	10090.ENSMUSP00000106249	10090.ENSMUSP00000073175	0	0	0	0	0.87	0.958	1	0.72	1	0.624	1	0.999
Ndufb10	Ndufab1	5022532	5020457	10090.ENSMUSP00000043543	10090.ENSMUSP00000033157	0	0	0	0	0.865	0.97	1	0.9	1	0.524	1	0.999
Ndufa13	Ndufs7	5032274	5031381	10090.ENSMUSP00000105796	10090.ENSMUSP00000101003	0	0	0	0	0.875	0.924	1	0.9	1	0.274	1	0.999
Rps15a	Rps17	5034103	5028013	10090.ENSMUSP00000119975	10090.ENSMUSP00000079628	0	0	0	0	0.887	0.972	1	0.72	1	0.46	1	0.999
Rps10	Rps25	5033114	5027947	10090.ENSMUSP00000110532	10090.ENSMUSP00000079180	0	0	0	0	0.862	0.958	1	0.72	1	0.675	1	0.999
Rpl37	Rps11	5023036	5015656	10090.ENSMUSP00000046506	10090.ENSMUSP00000003521	0	0	0	0	0.829	0.972	1	0.9	1	0.363	1	0.999
Rps16	Rps6	5031918	5031125	10090.ENSMUSP00000103940	10090.ENSMUSP00000099878	0	0	0	0	0.933	0.971	1	0.72	1	0.751	1	0.999
Rpl36a	Rpl15	5032811	5027943	10090.ENSMUSP00000108837	10090.ENSMUSP00000079163	0	0	0	0	0.861	0.945	1	0.72	1	0.69	1	0.999
Rps8	Rps3	5031065	5020408	10090.ENSMUSP00000099757	10090.ENSMUSP00000032998	0	0	0	0	0.999	0.97	1	0.9	1	0.782	1	0.999
Rpl18	Rps9	5031793	5015940	10090.ENSMUSP00000103365	10090.ENSMUSP00000006496	0.172	0	0	0	0.936	0.867	1	0.9	1	0.629	1	0.999
Ndufs8	Ndufs4	5027191	5017465	10090.ENSMUSP00000074600	10090.ENSMUSP00000022286	0	0	0	0	0.81	0.961	1	0.9	1	0.645	1	0.999
Rpl31	Rps24	5036727	5034648	10090.ENSMUSP00000137631	10090.ENSMUSP00000125977	0	0	0	0	0.939	0.97	1	0	0	0.828	1	0.999
Rpl30	Rpl19	5032315	5016512	10090.ENSMUSP00000106014	10090.ENSMUSP00000017548	0	0	0	0	0.925	0.971	1	0.9	1	0.696	1	0.999
Rpl23	Rps5	5030904	5015759	10090.ENSMUSP00000099435	10090.ENSMUSP00000004554	0.172	0	0	0	0.999	0.971	1	0.9	1	0.509	1	0.999
Rpl39	Rps25	5033187	5027947	10090.ENSMUSP00000110886	10090.ENSMUSP00000079180	0	0	0	0	0.909	0.971	1	0	0	0.665	1	0.999
Rpl31	Rpl18	5036727	5031793	10090.ENSMUSP00000137631	10090.ENSMUSP00000103365	0	0	0	0	0.911	0.962	1	0.72	1	0.69	1	0.999
Rpl22	Rpl27	5034020	5029225	10090.ENSMUSP00000118787	10090.ENSMUSP00000090305	0	0	0	0	0.831	0.958	1	0.72	1	0.574	1	0.999
Rpl38	Rps14	5031605	5018277	10090.ENSMUSP00000102213	10090.ENSMUSP00000025511	0	0	0	0	0.92	0.889	1	0.9	1	0.796	1	0.999
Rpl22	Rpl15	5034020	5027943	10090.ENSMUSP00000118787	10090.ENSMUSP00000079163	0	0	0	0	0.888	0.958	1	0.72	1	0.713	1	0.999
Rps24	Rpl10a	5034648	5023403	10090.ENSMUSP00000125977	10090.ENSMUSP00000048469	0	0	0	0	0.999	0.968	1	0	0	0.534	1	0.999
Rps8	Rps26	5031065	5018537	10090.ENSMUSP00000099757	10090.ENSMUSP00000026420	0	0	0	0	0.949	0.958	1	0.72	1	0.339	1	0.999
Rps8	Rpl10a	5031065	5023403	10090.ENSMUSP00000099757	10090.ENSMUSP00000048469	0	0	0	0	0.981	0.971	1	0.9	1	0.457	1	0.999
Rpl22	Rpl19	5034020	5016512	10090.ENSMUSP00000118787	10090.ENSMUSP00000017548	0	0	0	0	0.834	0.874	1	0.9	1	0.673	1	0.999
Rpl3	Rpl4	5028126	5021039	10090.ENSMUSP00000080354	10090.ENSMUSP00000034966	0.113	0	0	0	0.986	0.831	1	0.9	1	0.699	1	0.999
Rps16	Rps11	5031918	5015656	10090.ENSMUSP00000103940	10090.ENSMUSP00000003521	0.17	0	0	0	0.98	0.972	1	0.72	1	0.703	1	0.999
Rpl18	Rpl32	5031793	5028158	10090.ENSMUSP00000103365	10090.ENSMUSP00000080523	0	0	0	0	0.91	0.969	1	0.9	1	0.608	1	0.999
Rps17	Rps25	5028013	5027947	10090.ENSMUSP00000079628	10090.ENSMUSP00000079180	0	0	0	0	0.938	0.971	1	0.72	1	0.73	1	0.999
Rps27a	Rps6	5031143	5031125	10090.ENSMUSP00000099909	10090.ENSMUSP00000099878	0	0	0	0	0.899	0.896	1	0.9	1	0.242	1	0.999
Rpl35a	Rps27a	5033146	5031143	10090.ENSMUSP00000110731	10090.ENSMUSP00000099909	0	0	0	0	0.91	0.896	1	0.9	1	0.406	1	0.999
Rps19	Rps5	5031943	5015759	10090.ENSMUSP00000104067	10090.ENSMUSP00000004554	0	0	0	0	0.961	0.896	1	0.9	1	0.762	1	0.999
Rpl32	Rps5	5028158	5015759	10090.ENSMUSP00000080523	10090.ENSMUSP00000004554	0	0	0	0	0.943	0.971	1	0.9	1	0.538	1	0.999
Rps28	Rps5	5033019	5015759	10090.ENSMUSP00000110013	10090.ENSMUSP00000004554	0	0	0	0	0.912	0.958	1	0.9	1	0.685	1	0.999
Rpl27	Rpl10a	5029225	5023403	10090.ENSMUSP00000090305	10090.ENSMUSP00000048469	0	0	0	0	0.921	0.958	1	0.72	1	0.495	1	0.999
Rpl11	Rpl23	5030979	5030904	10090.ENSMUSP00000099595	10090.ENSMUSP00000099435	0.17	0	0	0	0.824	0.95	1	0.9	1	0.504	1	0.999
Rps27	Rpl32	5035720	5028158	10090.ENSMUSP00000132102	10090.ENSMUSP00000080523	0	0	0	0	0.827	0.958	1	0.9	1	0.51	1	0.999
Rpl31	Rps3a1	5036727	5019462	10090.ENSMUSP00000137631	10090.ENSMUSP00000029722	0	0	0	0	0.949	0.97	1	0	0	0.727	1	0.999
Ndufv2	Ndufs8	5034213	5027191	10090.ENSMUSP00000121557	10090.ENSMUSP00000074600	0.193	0	0.352	0	0.867	0.959	1	0.9	1	0.81	1	0.999
Psmc4	Psmc6	5020351	5017492	10090.ENSMUSP00000032824	10090.ENSMUSP00000022380	0	0	0.397	0.907	0.872	0.971	1	0.9	1	0.83	1	0.999
Rps13	Rps9	5034698	5015940	10090.ENSMUSP00000126294	10090.ENSMUSP00000006496	0.057	0	0	0	0.876	0.972	1	0.9	1	0.743	1	0.999
Ndufs7	Ndufa8	5031381	5025925	10090.ENSMUSP00000101003	10090.ENSMUSP00000065352	0	0	0	0	0.915	0.953	1	0.9	1	0.651	1	0.999
Rpl19	Rps18	5016512	5016094	10090.ENSMUSP00000017548	10090.ENSMUSP00000008812	0	0	0	0	0.839	0.95	1	0.9	1	0.441	1	0.999
Rpl37a	Rps11	5025033	5015656	10090.ENSMUSP00000058919	10090.ENSMUSP00000003521	0	0	0	0	0.953	0.97	1	0.9	1	0.57	1	0.999
Psmc6	Psmd6	5017492	5017456	10090.ENSMUSP00000022380	10090.ENSMUSP00000022256	0	0	0	0	0.917	0.87	1	0.9	1	0.815	1	0.999
Nop58	Fbl	5037094	5021545	10090.ENSMUSP00000140250	10090.ENSMUSP00000037613	0	0	0	0	0.867	0.799	1	0.9	1	0.9	1	0.999
Rpl14	Rpl38	5035620	5031605	10090.ENSMUSP00000131489	10090.ENSMUSP00000102213	0	0	0	0	0.881	0.853	1	0.9	1	0.512	1	0.999
Rpl18	Rps8	5031793	5031065	10090.ENSMUSP00000103365	10090.ENSMUSP00000099757	0	0	0	0	0.959	0.866	1	0.9	1	0.337	1	0.999
Rpl34	Rpl19	5028844	5016512	10090.ENSMUSP00000086614	10090.ENSMUSP00000017548	0.172	0	0	0	0.934	0.801	1	0.9	1	0.359	1	0.999
Rpl11	Rpl32	5030979	5028158	10090.ENSMUSP00000099595	10090.ENSMUSP00000080523	0.139	0	0	0	0.825	0.95	1	0.9	1	0.443	1	0.999
Rpl31	Rpl8	5036727	5015714	10090.ENSMUSP00000137631	10090.ENSMUSP00000004072	0	0	0	0	0.879	0.971	1	0.72	1	0.484	1	0.999
Ndufs7	Ndufb9	5031381	5017677	10090.ENSMUSP00000101003	10090.ENSMUSP00000022980	0	0	0	0	0.851	0.917	1	0.9	1	0.549	1	0.999
Rpl31	Rps17	5036727	5028013	10090.ENSMUSP00000137631	10090.ENSMUSP00000079628	0	0	0	0	0.914	0.971	1	0	0	0.814	1	0.999
Rpl34	Rps21	5028844	5024953	10090.ENSMUSP00000086614	10090.ENSMUSP00000058432	0	0	0	0	0.948	0.801	1	0.9	1	0.372	1	0.999
Rpl11	Rps25	5030979	5027947	10090.ENSMUSP00000099595	10090.ENSMUSP00000079180	0	0	0	0	0.857	0.95	1	0.9	1	0.75	1	0.999
Rpl35a	Rpl38	5033146	5031605	10090.ENSMUSP00000110731	10090.ENSMUSP00000102213	0	0	0	0	0.91	0.889	1	0.9	1	0.748	1	0.999
Rps16	Rpl26	5031918	5026969	10090.ENSMUSP00000103940	10090.ENSMUSP00000073175	0.139	0	0	0	0.934	0.971	1	0	0	0.649	1	0.999
Rpl26	Rps14	5026969	5018277	10090.ENSMUSP00000073175	10090.ENSMUSP00000025511	0.164	0	0.364	0	0.933	0.97	1	0.9	1	0.874	1	0.999
Psmc1	Psmc5	5017247	5017086	10090.ENSMUSP00000021595	10090.ENSMUSP00000021049	0	0	0.399	0.922	0.891	0.971	1	0.9	1	0.841	1	0.999
Psmd11	Psmd3	5016515	5016500	10090.ENSMUSP00000017572	10090.ENSMUSP00000017365	0	0	0	0	0.8	0.896	1	0.9	1	0.863	1	0.999
Rpl35a	Rpl27	5033146	5029225	10090.ENSMUSP00000110731	10090.ENSMUSP00000090305	0	0	0	0	0.85	0.958	1	0.72	1	0.683	1	0.999
Rps6	Rpl5	5031125	5028222	10090.ENSMUSP00000099878	10090.ENSMUSP00000080854	0	0	0	0	0.999	0.874	1	0	0	0.827	1	0.999
Rps15a	Rps11	5034103	5015656	10090.ENSMUSP00000119975	10090.ENSMUSP00000003521	0.193	0	0.203	0	0.999	0.972	1	0.9	1	0.731	1	0.999
Rps28	Rps7	5033019	5027079	10090.ENSMUSP00000110013	10090.ENSMUSP00000073880	0	0	0	0	0.88	0.939	1	0.9	1	0.382	1	0.999
Rpl22	Rps3a1	5034020	5019462	10090.ENSMUSP00000118787	10090.ENSMUSP00000029722	0	0	0	0	0.91	0.971	1	0.9	1	0.533	1	0.999
Rpl22	Rps18	5034020	5016094	10090.ENSMUSP00000118787	10090.ENSMUSP00000008812	0	0	0	0	0.729	0.95	1	0.9	1	0.507	1	0.999
Ndufa13	Ndufv1	5032274	5022440	10090.ENSMUSP00000105796	10090.ENSMUSP00000042967	0	0	0	0	0.819	0.944	1	0.9	1	0.522	1	0.999
Rpl5	Rps14	5028222	5018277	10090.ENSMUSP00000080854	10090.ENSMUSP00000025511	0.172	0	0	0	0.999	0.86	1	0	0	0.909	1	0.999
Rps14	Rps18	5018277	5016094	10090.ENSMUSP00000025511	10090.ENSMUSP00000008812	0.139	0	0	0	0.828	0.95	1	0.9	1	0.61	1	0.999
Rps25	Rpl37a	5027947	5025033	10090.ENSMUSP00000079180	10090.ENSMUSP00000058919	0	0	0	0	0.999	0.97	1	0.9	1	0.165	1	0.999
Ndufa12	Ndufs3	5036277	5015856	10090.ENSMUSP00000136313	10090.ENSMUSP00000005647	0	0	0	0	0.806	0.95	1	0.9	1	0.325	1	0.999
Rps16	Rpl18	5031918	5031793	10090.ENSMUSP00000103940	10090.ENSMUSP00000103365	0.17	0	0	0	0.94	0.97	1	0	0	0.84	1	0.999
Rps15a	Rps14	5034103	5018277	10090.ENSMUSP00000119975	10090.ENSMUSP00000025511	0.172	0	0.317	0	0.999	0.971	1	0.9	1	0.727	1	0.999
Rpl36al	Rpl37a	5032361	5025033	10090.ENSMUSP00000106249	10090.ENSMUSP00000058919	0	0	0	0	0.855	0.958	1	0.72	1	0.561	1	0.999
Ndufa12	Ndufa8	5036277	5025925	10090.ENSMUSP00000136313	10090.ENSMUSP00000065352	0	0	0	0	0.863	0.925	1	0.9	1	0.544	1	0.999
Ndufb10	Ndufb9	5022532	5017677	10090.ENSMUSP00000043543	10090.ENSMUSP00000022980	0	0	0	0	0.91	0.94	1	0.9	1	0.662	1	0.999
Ndufa10	Ndufs1	5018820	5018711	10090.ENSMUSP00000027478	10090.ENSMUSP00000027111	0	0	0	0	0.808	0.923	1	0.9	1	0.828	1	0.999
Psmd7	Psmd6	5022298	5017456	10090.ENSMUSP00000041968	10090.ENSMUSP00000022256	0	0	0	0	0.817	0.812	1	0.9	1	0.876	1	0.999
Rpl39	Rpl35a	5033187	5033146	10090.ENSMUSP00000110886	10090.ENSMUSP00000110731	0	0	0	0	0.928	0.97	1	0.72	1	0.58	1	0.999
Psmd12	Psmd3	5017092	5016500	10090.ENSMUSP00000021063	10090.ENSMUSP00000017365	0	0	0	0	0.803	0.892	1	0.9	1	0.861	1	0.999
Rps15a	Rpl32	5034103	5028158	10090.ENSMUSP00000119975	10090.ENSMUSP00000080523	0.172	0	0	0	0.908	0.971	1	0.9	1	0.419	1	0.999
Rps9	Rps11	5015940	5015656	10090.ENSMUSP00000006496	10090.ENSMUSP00000003521	0.172	0	0	0	0.886	0.972	1	0.9	1	0.651	1	0.999
Rps28	Rpl8	5033019	5015714	10090.ENSMUSP00000110013	10090.ENSMUSP00000004072	0	0	0	0	0.921	0.958	1	0.9	1	0.489	1	0.999
Rpl18	Rps11	5031793	5015656	10090.ENSMUSP00000103365	10090.ENSMUSP00000003521	0	0	0	0	0.929	0.97	1	0.9	1	0.676	1	0.999
Rps28	Rps16	5033019	5031918	10090.ENSMUSP00000110013	10090.ENSMUSP00000103940	0	0	0	0	0.862	0.958	1	0.72	1	0.492	1	0.999
Rpl31	Rpl37	5036727	5023036	10090.ENSMUSP00000137631	10090.ENSMUSP00000046506	0	0	0	0	0.866	0.971	1	0.72	1	0.542	1	0.999
Rps21	Rps3a1	5024953	5019462	10090.ENSMUSP00000058432	10090.ENSMUSP00000029722	0	0	0	0	0.935	0.896	1	0.9	1	0.428	1	0.999
Rpl37a	Rps21	5025033	5024953	10090.ENSMUSP00000058919	10090.ENSMUSP00000058432	0	0	0	0	0.971	0.889	1	0.9	1	0.502	1	0.999
Rps23	Rpl19	5024346	5016512	10090.ENSMUSP00000054490	10090.ENSMUSP00000017548	0	0	0.219	0	0.942	0.971	1	0.9	1	0.714	1	0.999
Rpl23	Rpl8	5030904	5015714	10090.ENSMUSP00000099435	10090.ENSMUSP00000004072	0.172	0	0.317	0	0.999	0.971	1	0.9	1	0.305	1	0.999
Rps20	Rps29	5034139	5021660	10090.ENSMUSP00000120528	10090.ENSMUSP00000038352	0.139	0	0	0	0.83	0.97	1	0.72	1	0.548	1	0.999
Rps8	Rps21	5031065	5024953	10090.ENSMUSP00000099757	10090.ENSMUSP00000058432	0	0	0	0	0.961	0.888	1	0.9	1	0.41	1	0.999
Rpl39	Rps28	5033187	5033019	10090.ENSMUSP00000110886	10090.ENSMUSP00000110013	0	0	0	0	0.845	0.958	1	0.72	1	0.607	1	0.999
Rpl14	Rpl3	5035620	5028126	10090.ENSMUSP00000131489	10090.ENSMUSP00000080354	0.088	0	0	0	0.883	0.818	1	0.9	1	0.695	1	0.999
Ndufv2	Ndufs1	5034213	5018711	10090.ENSMUSP00000121557	10090.ENSMUSP00000027111	0.193	0	0.4	0	0.805	0.962	1	0.9	1	0.821	1	0.999
Psmd7	Psmc6	5022298	5017492	10090.ENSMUSP00000041968	10090.ENSMUSP00000022380	0	0	0	0	0.809	0.896	1	0.9	1	0.857	1	0.999
Rps8	Rps9	5031065	5015940	10090.ENSMUSP00000099757	10090.ENSMUSP00000006496	0	0	0	0	0.936	0.971	1	0.9	1	0.695	1	0.999
Ndufa9	Ndufa6	5028727	5017711	10090.ENSMUSP00000085523	10090.ENSMUSP00000023085	0	0	0	0	0.5	0.97	1	0.9	1	0.63	1	0.999
Rpl3	Rps23	5028126	5024346	10090.ENSMUSP00000080354	10090.ENSMUSP00000054490	0.139	0	0.218	0	0.909	0.871	1	0.9	1	0.636	1	0.999
Rps27a	Rps3a1	5031143	5019462	10090.ENSMUSP00000099909	10090.ENSMUSP00000029722	0	0	0	0	0.928	0.894	1	0.9	1	0.115	1	0.999
Rpl31	Rpl38	5036727	5031605	10090.ENSMUSP00000137631	10090.ENSMUSP00000102213	0	0	0	0	0.886	0.896	1	0.72	1	0.748	1	0.999
Rpl39	Rpl30	5033187	5032315	10090.ENSMUSP00000110886	10090.ENSMUSP00000106014	0	0	0	0	0.934	0.971	1	0.72	1	0.613	1	0.999
Rpl35a	Rpl8	5033146	5015714	10090.ENSMUSP00000110731	10090.ENSMUSP00000004072	0	0	0	0	0.938	0.971	1	0.9	1	0.209	1	0.999
Rps16	Rps9	5031918	5015940	10090.ENSMUSP00000103940	10090.ENSMUSP00000006496	0.139	0	0	0	0.922	0.971	1	0.72	1	0.461	1	0.999
Rps18	Rps5	5016094	5015759	10090.ENSMUSP00000008812	10090.ENSMUSP00000004554	0.139	0	0	0	0.829	0.95	1	0.9	1	0.625	1	0.999
Rpl39	Rpl8	5033187	5015714	10090.ENSMUSP00000110886	10090.ENSMUSP00000004072	0.057	0	0	0	0.835	0.971	1	0.72	1	0.506	1	0.999
Rpl31	Rpl32	5036727	5028158	10090.ENSMUSP00000137631	10090.ENSMUSP00000080523	0	0	0	0	0.909	0.97	1	0.72	1	0.624	1	0.999
Rps24	Rpl3	5034648	5028126	10090.ENSMUSP00000125977	10090.ENSMUSP00000080354	0	0	0	0	0.999	0.793	1	0	0	0.677	1	0.999
Rpl11	Rps23	5030979	5024346	10090.ENSMUSP00000099595	10090.ENSMUSP00000054490	0.139	0	0	0	0.853	0.95	1	0.9	1	0.681	1	0.999
Rpl30	Rps19	5032315	5031943	10090.ENSMUSP00000106014	10090.ENSMUSP00000104067	0	0	0	0	0.923	0.896	1	0.9	1	0.505	1	0.999
Rps27a	Rpl23	5031143	5030904	10090.ENSMUSP00000099909	10090.ENSMUSP00000099435	0	0	0	0	0.911	0.896	1	0.9	1	0.362	1	0.999
Psmd7	Psmd14	5022298	5019035	10090.ENSMUSP00000041968	10090.ENSMUSP00000028278	0	0	0	0	0.808	0.896	1	0.9	1	0.861	1	0.999
Ndufb8	Ndufs2	5018490	5016267	10090.ENSMUSP00000026222	10090.ENSMUSP00000013737	0	0	0	0	0.821	0.891	1	0.9	1	0.641	1	0.999
Ndufv2	Ndufa9	5034213	5028727	10090.ENSMUSP00000121557	10090.ENSMUSP00000085523	0	0	0	0	0.838	0.956	1	0.9	1	0.704	1	0.999
Rps25	Rps18	5027947	5016094	10090.ENSMUSP00000079180	10090.ENSMUSP00000008812	0	0	0	0	0.844	0.95	1	0.9	1	0.304	1	0.999
Rps25	Rps29	5027947	5021660	10090.ENSMUSP00000079180	10090.ENSMUSP00000038352	0	0	0	0	0.865	0.97	1	0.72	1	0.733	1	0.999
Rpl32	Rps11	5028158	5015656	10090.ENSMUSP00000080523	10090.ENSMUSP00000003521	0.172	0	0	0	0.912	0.971	1	0.9	1	0.544	1	0.999
Rpl35a	Rpl30	5033146	5032315	10090.ENSMUSP00000110731	10090.ENSMUSP00000106014	0	0	0	0	0.999	0.971	1	0.9	1	0.473	1	0.999
Rps13	Rps27a	5034698	5031143	10090.ENSMUSP00000126294	10090.ENSMUSP00000099909	0	0	0	0	0.875	0.896	1	0.9	1	0.384	1	0.999
Rpl14	Rps23	5035620	5024346	10090.ENSMUSP00000131489	10090.ENSMUSP00000054490	0.088	0	0	0	0.881	0.866	1	0.9	1	0.653	1	0.999
Rpl30	Rpl27	5032315	5029225	10090.ENSMUSP00000106014	10090.ENSMUSP00000090305	0	0	0	0	0.834	0.958	1	0.72	1	0.734	1	0.999
Rps20	Rps26	5034139	5018537	10090.ENSMUSP00000120528	10090.ENSMUSP00000026420	0	0	0	0	0.856	0.958	1	0.72	1	0.612	1	0.999
Rpl32	Rpl8	5028158	5015714	10090.ENSMUSP00000080523	10090.ENSMUSP00000004072	0.164	0	0	0	0.939	0.971	1	0.9	1	0.477	1	0.999
Rps6	Rps25	5031125	5027947	10090.ENSMUSP00000099878	10090.ENSMUSP00000079180	0	0	0	0	0.938	0.971	1	0.9	1	0.727	1	0.999
Rpl35a	Rps7	5033146	5027079	10090.ENSMUSP00000110731	10090.ENSMUSP00000073880	0	0	0	0	0.836	0.95	1	0.9	1	0.646	1	0.999
Rps16	Rpl32	5031918	5028158	10090.ENSMUSP00000103940	10090.ENSMUSP00000080523	0	0	0	0	0.91	0.971	1	0	0	0.711	1	0.999
Rpl14	Rpl30	5035620	5032315	10090.ENSMUSP00000131489	10090.ENSMUSP00000106014	0	0	0	0	0.918	0.854	1	0.9	1	0.472	1	0.999
Rpl26	Rps21	5026969	5024953	10090.ENSMUSP00000073175	10090.ENSMUSP00000058432	0	0	0	0	0.971	0.89	1	0.9	1	0.376	1	0.999
Ndufb8	Ndufs4	5018490	5017465	10090.ENSMUSP00000026222	10090.ENSMUSP00000022286	0	0	0	0	0.822	0.96	1	0.9	1	0.526	1	0.999
Rps10	Rps17	5033114	5028013	10090.ENSMUSP00000110532	10090.ENSMUSP00000079628	0	0	0	0	0.861	0.958	1	0.72	1	0.888	1	0.999
Ndufa8	Ndufs4	5025925	5017465	10090.ENSMUSP00000065352	10090.ENSMUSP00000022286	0	0	0	0	0.827	0.943	1	0.9	1	0.655	1	0.999
Ndufs7	Ndufb10	5031381	5022532	10090.ENSMUSP00000101003	10090.ENSMUSP00000043543	0	0	0	0	0.858	0.958	1	0.9	1	0.417	1	0.999
Rpl26	Rpl6	5026969	5020043	10090.ENSMUSP00000073175	10090.ENSMUSP00000031617	0.107	0	0	0	0.916	0.795	1	0.9	1	0.764	1	0.999
Rpl37a	Rps3a1	5025033	5019462	10090.ENSMUSP00000058919	10090.ENSMUSP00000029722	0	0	0	0	0.933	0.97	1	0.9	1	0.308	1	0.999
Rpl39	Rpl38	5033187	5031605	10090.ENSMUSP00000110886	10090.ENSMUSP00000102213	0	0	0	0	0.909	0.894	1	0.72	1	0.759	1	0.999
Rps16	Rps14	5031918	5018277	10090.ENSMUSP00000103940	10090.ENSMUSP00000025511	0.139	0	0	0	0.94	0.97	1	0.72	1	0.761	1	0.999
Rpl14	Rps3a1	5035620	5019462	10090.ENSMUSP00000131489	10090.ENSMUSP00000029722	0	0	0	0	0.915	0.86	1	0.9	1	0.687	1	0.999
Rpl35a	Rps5	5033146	5015759	10090.ENSMUSP00000110731	10090.ENSMUSP00000004554	0	0	0	0	0.909	0.971	1	0.9	1	0.225	1	0.999
Rps28	Rps14	5033019	5018277	10090.ENSMUSP00000110013	10090.ENSMUSP00000025511	0	0	0	0	0.866	0.958	1	0.9	1	0.754	1	0.999
Rps27a	Rpl34	5031143	5028844	10090.ENSMUSP00000099909	10090.ENSMUSP00000086614	0	0	0	0	0.908	0.801	1	0.9	1	0.32	1	0.998
Rpl11	Rps26	5030979	5018537	10090.ENSMUSP00000099595	10090.ENSMUSP00000026420	0	0	0	0	0.744	0.939	1	0.72	1	0.732	1	0.998
Rpl11	Rpl7	5030979	5026693	10090.ENSMUSP00000099595	10090.ENSMUSP00000071616	0.098	0	0	0	0.807	0.943	1	0.72	1	0.632	1	0.998
Rpl39	Rps21	5033187	5024953	10090.ENSMUSP00000110886	10090.ENSMUSP00000058432	0	0	0	0	0.934	0.858	1	0.72	1	0.535	1	0.998
Rpl15	Rps23	5027943	5024346	10090.ENSMUSP00000079163	10090.ENSMUSP00000054490	0	0	0	0	0.906	0.958	1	0	0	0.595	1	0.998
Rps27a	Rpl37	5031143	5023036	10090.ENSMUSP00000099909	10090.ENSMUSP00000046506	0	0	0	0	0.828	0.896	1	0.9	1	0.18	1	0.998
Rpl27-ps3	Rpl8	5029953	5015714	10090.ENSMUSP00000095287	10090.ENSMUSP00000004072	0.107	0	0	0	0.809	0.958	1	0.72	1	0.533	1	0.998
Rps24	Rps10	5034648	5033114	10090.ENSMUSP00000125977	10090.ENSMUSP00000110532	0	0	0	0	0.811	0.801	1	0.72	1	0.885	1	0.998
Rps15a	Rps26	5034103	5018537	10090.ENSMUSP00000119975	10090.ENSMUSP00000026420	0	0	0	0	0.854	0.958	1	0.72	1	0.174	1	0.998
Rpl36a	Rpl27	5032811	5029225	10090.ENSMUSP00000108837	10090.ENSMUSP00000090305	0	0	0	0	0.887	0.945	1	0.72	1	0.308	1	0.998
Rps7	Rps26	5027079	5018537	10090.ENSMUSP00000073880	10090.ENSMUSP00000026420	0	0	0	0	0.861	0.939	1	0.72	1	0.612	1	0.998
Rpl36	Rps7	5027972	5027079	10090.ENSMUSP00000079340	10090.ENSMUSP00000073880	0	0	0	0	0.78	0.929	1	0.9	1	0.397	1	0.998
Rps24	Rpl32	5034648	5028158	10090.ENSMUSP00000125977	10090.ENSMUSP00000080523	0	0	0	0	0.921	0.97	1	0	0	0.39	1	0.998
Uba52	Rpl37a	5034113	5025033	10090.ENSMUSP00000120096	10090.ENSMUSP00000058919	0	0	0	0	0.709	0.945	1	0.9	1	0.225	1	0.998
Rpl31	Rpl14	5036727	5035620	10090.ENSMUSP00000137631	10090.ENSMUSP00000131489	0	0	0	0	0.915	0.821	1	0.72	1	0.694	1	0.998
Ndufab1	Ndufa10	5020457	5018820	10090.ENSMUSP00000033157	10090.ENSMUSP00000027478	0	0	0	0	0.398	0.97	1	0.9	1	0.461	1	0.998
Rpl10a	Rpl6	5023403	5020043	10090.ENSMUSP00000048469	10090.ENSMUSP00000031617	0	0	0	0	0.916	0.79	1	0.9	1	0.43	1	0.998
Rpl18	Rpl5	5031793	5028222	10090.ENSMUSP00000103365	10090.ENSMUSP00000080854	0	0	0	0	0.895	0.848	1	0.72	1	0.644	1	0.998
Rps19	Rps26	5031943	5018537	10090.ENSMUSP00000104067	10090.ENSMUSP00000026420	0	0	0	0	0.912	0.801	1	0.54	1	0.831	1	0.998
Rpl5	Rpl32	5028222	5028158	10090.ENSMUSP00000080854	10090.ENSMUSP00000080523	0.172	0	0	0	0.91	0.856	1	0.72	1	0.487	1	0.998
Rpl32	Rpl15	5028158	5027943	10090.ENSMUSP00000080523	10090.ENSMUSP00000079163	0	0	0	0	0.865	0.958	1	0.72	1	0.415	1	0.998
Rpl27-ps3	Rpl32	5029953	5028158	10090.ENSMUSP00000095287	10090.ENSMUSP00000080523	0.097	0	0	0	0.801	0.958	1	0.72	1	0.284	1	0.998
Uba52	Rpl35a	5034113	5033146	10090.ENSMUSP00000120096	10090.ENSMUSP00000110731	0	0	0	0	0.71	0.945	1	0.9	1	0.124	1	0.998
Rpl11	Rps29	5030979	5021660	10090.ENSMUSP00000099595	10090.ENSMUSP00000038352	0.113	0	0	0	0.751	0.95	1	0.72	1	0.62	1	0.998
Rps25	Rpl6	5027947	5020043	10090.ENSMUSP00000079180	10090.ENSMUSP00000031617	0	0	0	0	0.872	0.797	1	0.9	1	0.656	1	0.998
Rps17	Rpl37	5028013	5023036	10090.ENSMUSP00000079628	10090.ENSMUSP00000046506	0	0	0	0	0.837	0.972	1	0	0	0.648	1	0.998
Rpl18	Rps29	5031793	5021660	10090.ENSMUSP00000103365	10090.ENSMUSP00000038352	0	0	0	0	0.856	0.949	1	0.72	1	0.559	1	0.998
Uba52	Rps3	5034113	5020408	10090.ENSMUSP00000120096	10090.ENSMUSP00000032998	0	0	0	0	0.712	0.945	1	0.9	1	0.162	1	0.998
Rps20	Rpl8	5034139	5015714	10090.ENSMUSP00000120528	10090.ENSMUSP00000004072	0.164	0	0	0	0.91	0.972	1	0	0	0.466	1	0.998
Uba52	Rpl32	5034113	5028158	10090.ENSMUSP00000120096	10090.ENSMUSP00000080523	0	0	0	0	0.713	0.945	1	0.9	1	0.278	1	0.998
Rps27a	Rpl6	5031143	5020043	10090.ENSMUSP00000099909	10090.ENSMUSP00000031617	0	0	0	0	0.903	0.787	1	0.9	1	0.218	1	0.998
Rps24	Rpl30	5034648	5032315	10090.ENSMUSP00000125977	10090.ENSMUSP00000106014	0	0	0	0	0.877	0.969	1	0	0	0.712	1	0.998
Rpl36al	Rpl27	5032361	5029225	10090.ENSMUSP00000106249	10090.ENSMUSP00000090305	0	0	0	0	0.875	0.945	1	0.72	1	0.31	1	0.998
Rps8	Rpl15	5031065	5027943	10090.ENSMUSP00000099757	10090.ENSMUSP00000079163	0	0	0	0	0.927	0.958	1	0	0	0.666	1	0.998
Rpl7	Rpl6	5026693	5020043	10090.ENSMUSP00000071616	10090.ENSMUSP00000031617	0.077	0	0	0	0.911	0.787	1	0.72	1	0.746	1	0.998
Rpl14	Rpl10a	5035620	5023403	10090.ENSMUSP00000131489	10090.ENSMUSP00000048469	0	0	0	0	0.888	0.868	1	0.9	1	0.174	1	0.998
Rps17	Rpl36	5028013	5027972	10090.ENSMUSP00000079628	10090.ENSMUSP00000079340	0	0	0	0	0.907	0.95	1	0	0	0.676	1	0.998
Rpl22	Rpl3	5034020	5028126	10090.ENSMUSP00000118787	10090.ENSMUSP00000080354	0	0	0	0	0.717	0.82	1	0.9	1	0.701	1	0.998
Rpl27-ps3	Rpl10a	5029953	5023403	10090.ENSMUSP00000095287	10090.ENSMUSP00000048469	0	0	0	0	0.807	0.958	1	0.72	1	0.509	1	0.998
Rpl23	Rpl6	5030904	5020043	10090.ENSMUSP00000099435	10090.ENSMUSP00000031617	0.153	0	0	0	0.87	0.799	1	0.9	1	0.407	1	0.998
Rpl22	Rpl6	5034020	5020043	10090.ENSMUSP00000118787	10090.ENSMUSP00000031617	0	0	0	0	0.8	0.792	1	0.9	1	0.686	1	0.998
Rps19	Rpl4	5031943	5021039	10090.ENSMUSP00000104067	10090.ENSMUSP00000034966	0	0	0	0	0.854	0.831	1	0.9	1	0.369	1	0.998
Psmd14	Psmd13	5019035	5018587	10090.ENSMUSP00000028278	10090.ENSMUSP00000026560	0	0	0	0	0.787	0.801	1	0.9	1	0.778	1	0.998
Rps15a	Rpl7	5034103	5026693	10090.ENSMUSP00000119975	10090.ENSMUSP00000071616	0.164	0	0	0	0.929	0.958	1	0	0	0.498	1	0.998
Ndufa10	Ndufb8	5018820	5018490	10090.ENSMUSP00000027478	10090.ENSMUSP00000026222	0	0	0	0	0.83	0.891	1	0.9	1	0.472	1	0.998
Rplp2	Rpl32	5028293	5028158	10090.ENSMUSP00000081474	10090.ENSMUSP00000080523	0	0	0	0	0.882	0.816	1	0.9	1	0.213	1	0.998
Rps8	Rpl7	5031065	5026693	10090.ENSMUSP00000099757	10090.ENSMUSP00000071616	0	0	0	0	0.955	0.821	1	0	0	0.771	1	0.998
Rplp2	Rps3a1	5028293	5019462	10090.ENSMUSP00000081474	10090.ENSMUSP00000029722	0	0	0	0	0.868	0.86	1	0.9	1	0.391	1	0.998
Rpl35a	Rpl6	5033146	5020043	10090.ENSMUSP00000110731	10090.ENSMUSP00000031617	0	0	0	0	0.867	0.799	1	0.9	1	0.542	1	0.998
Rps21	Rps29	5024953	5021660	10090.ENSMUSP00000058432	10090.ENSMUSP00000038352	0	0	0	0	0.961	0.821	1	0.72	1	0.425	1	0.998
Rpl31	Rps16	5036727	5031918	10090.ENSMUSP00000137631	10090.ENSMUSP00000103940	0	0	0	0	0.916	0.97	1	0	0	0.512	1	0.998
Rpl18	Rpl6	5031793	5020043	10090.ENSMUSP00000103365	10090.ENSMUSP00000031617	0	0	0	0	0.863	0.786	1	0.9	1	0.633	1	0.998
Rpl23	Rpl34	5030904	5028844	10090.ENSMUSP00000099435	10090.ENSMUSP00000086614	0.172	0	0	0	0.911	0.801	1	0.9	1	0.166	1	0.998
Rps6	Rps26	5031125	5018537	10090.ENSMUSP00000099878	10090.ENSMUSP00000026420	0	0	0	0	0.862	0.958	1	0.72	1	0.334	1	0.998
Rpl11	Rpl4	5030979	5021039	10090.ENSMUSP00000099595	10090.ENSMUSP00000034966	0.113	0	0	0	0.797	0.753	1	0.9	1	0.77	1	0.998
Uba52	Rps15a	5034113	5034103	10090.ENSMUSP00000120096	10090.ENSMUSP00000119975	0	0	0	0	0.699	0.945	1	0.9	1	0.377	1	0.998
Ndufa8	Ndufs1	5025925	5018711	10090.ENSMUSP00000065352	10090.ENSMUSP00000027111	0	0	0	0	0.451	0.95	1	0.9	1	0.45	1	0.998
Rpl36al	Rpl37	5032361	5023036	10090.ENSMUSP00000106249	10090.ENSMUSP00000046506	0	0	0	0	0.79	0.958	1	0.72	1	0.592	1	0.998
Rpl31	Rpl11	5036727	5030979	10090.ENSMUSP00000137631	10090.ENSMUSP00000099595	0	0	0	0	0.771	0.95	1	0.72	1	0.641	1	0.998
Rpl35a	Rps29	5033146	5021660	10090.ENSMUSP00000110731	10090.ENSMUSP00000038352	0	0	0	0	0.863	0.96	1	0	0	0.766	1	0.998
Rpl36a	Rps3a1	5032811	5019462	10090.ENSMUSP00000108837	10090.ENSMUSP00000029722	0	0	0	0	0.862	0.958	1	0	0	0.678	1	0.998
Rps6	Rplp2	5031125	5028293	10090.ENSMUSP00000099878	10090.ENSMUSP00000081474	0	0	0	0	0.827	0.872	1	0.9	1	0.319	1	0.998
Rpl38	Rpl11	5031605	5030979	10090.ENSMUSP00000102213	10090.ENSMUSP00000099595	0	0	0	0	0.825	0.768	1	0.9	1	0.707	1	0.998
Rps20	Rpl22	5034139	5034020	10090.ENSMUSP00000120528	10090.ENSMUSP00000118787	0	0	0	0	0.836	0.971	1	0	0	0.614	1	0.998
Rpl34	Rps11	5028844	5015656	10090.ENSMUSP00000086614	10090.ENSMUSP00000003521	0.172	0	0	0	0.932	0.801	1	0.9	1	0.212	1	0.998
Rps19	Rpl6	5031943	5020043	10090.ENSMUSP00000104067	10090.ENSMUSP00000031617	0	0	0	0	0.825	0.799	1	0.9	1	0.665	1	0.998
Rpl31	Rps13	5036727	5034698	10090.ENSMUSP00000137631	10090.ENSMUSP00000126294	0	0	0	0	0.912	0.97	1	0	0	0.445	1	0.998
Rps15a	Rps10	5034103	5033114	10090.ENSMUSP00000119975	10090.ENSMUSP00000110532	0	0	0	0	0.803	0.958	1	0.72	1	0.6	1	0.998
Rpl35a	Rpl34	5033146	5028844	10090.ENSMUSP00000110731	10090.ENSMUSP00000086614	0	0	0	0	0.873	0.801	1	0.9	1	0.475	1	0.998
Rpl14	Rpl34	5035620	5028844	10090.ENSMUSP00000131489	10090.ENSMUSP00000086614	0.107	0	0	0	0.829	0.799	1	0.9	1	0.714	1	0.998
Rpl7	Rps23	5026693	5024346	10090.ENSMUSP00000071616	10090.ENSMUSP00000054490	0.119	0	0	0	0.91	0.961	1	0	0	0.629	1	0.998
Rps7	Rps29	5027079	5021660	10090.ENSMUSP00000073880	10090.ENSMUSP00000038352	0	0	0	0	0.853	0.95	1	0.72	1	0.325	1	0.998
Uba52	Rps5	5034113	5015759	10090.ENSMUSP00000120096	10090.ENSMUSP00000004554	0	0	0	0	0.711	0.945	1	0.9	1	0	0	0.998
Rpl34	Rpl10a	5028844	5023403	10090.ENSMUSP00000086614	10090.ENSMUSP00000048469	0	0	0	0	0.91	0.801	1	0.9	1	0.447	1	0.998
Rps27	Rps21	5035720	5024953	10090.ENSMUSP00000132102	10090.ENSMUSP00000058432	0	0	0	0	0.828	0.8	1	0.9	1	0.62	1	0.998
Rps20	Rps21	5034139	5024953	10090.ENSMUSP00000120528	10090.ENSMUSP00000058432	0	0	0	0	0.908	0.889	1	0.72	1	0.52	1	0.998
Rpl35a	Rpl4	5033146	5021039	10090.ENSMUSP00000110731	10090.ENSMUSP00000034966	0	0	0	0	0.911	0.831	1	0.9	1	0.33	1	0.998
Rpl39	Rpl15	5033187	5027943	10090.ENSMUSP00000110886	10090.ENSMUSP00000079163	0	0	0	0	0.828	0.958	1	0.72	1	0.56	1	0.998
Rpl6	Rps9	5020043	5015940	10090.ENSMUSP00000031617	10090.ENSMUSP00000006496	0.107	0	0	0	0.818	0.797	1	0.9	1	0.574	1	0.998
Rps29	Rps18	5021660	5016094	10090.ENSMUSP00000038352	10090.ENSMUSP00000008812	0.113	0	0	0	0.775	0.95	1	0.72	1	0.53	1	0.998
Rps7	Rps18	5027079	5016094	10090.ENSMUSP00000073880	10090.ENSMUSP00000008812	0	0	0	0	0.755	0.929	1	0.9	1	0.106	1	0.998
Rpl22	Rpl36al	5034020	5032361	10090.ENSMUSP00000118787	10090.ENSMUSP00000106249	0	0	0	0	0.809	0.958	1	0.72	1	0.527	1	0.998
Uba52	Rps14	5034113	5018277	10090.ENSMUSP00000120096	10090.ENSMUSP00000025511	0	0	0	0	0.711	0.945	1	0.9	1	0.245	1	0.998
Rps7	Rpl37	5027079	5023036	10090.ENSMUSP00000073880	10090.ENSMUSP00000046506	0	0	0	0	0.721	0.95	1	0.9	1	0.283	1	0.998
Rpl37a	Rpl4	5025033	5021039	10090.ENSMUSP00000058919	10090.ENSMUSP00000034966	0	0	0	0	0.831	0.845	1	0.9	1	0.449	1	0.998
Rpl38	Rpl36	5031605	5027972	10090.ENSMUSP00000102213	10090.ENSMUSP00000079340	0	0	0	0	0.884	0.768	1	0.9	1	0.559	1	0.998
Rplp2	Rps3	5028293	5020408	10090.ENSMUSP00000081474	10090.ENSMUSP00000032998	0	0	0	0	0.876	0.806	1	0.9	1	0.554	1	0.998
Rps2	Rpl37a	5029538	5025033	10090.ENSMUSP00000092502	10090.ENSMUSP00000058919	0	0	0	0	0.704	0.938	1	0.9	1	0.384	1	0.998
Rpl22	Rpl4	5034020	5021039	10090.ENSMUSP00000118787	10090.ENSMUSP00000034966	0	0	0	0	0.834	0.817	1	0.9	1	0.623	1	0.998
Uba52	Rpl23	5034113	5030904	10090.ENSMUSP00000120096	10090.ENSMUSP00000099435	0	0	0	0	0.711	0.945	1	0.9	1	0.215	1	0.998
Rpl35a	Rps10	5033146	5033114	10090.ENSMUSP00000110731	10090.ENSMUSP00000110532	0	0	0	0	0.796	0.958	1	0	0	0.887	1	0.998
Rps20	Rpl10a	5034139	5023403	10090.ENSMUSP00000120528	10090.ENSMUSP00000048469	0.164	0	0	0	0.915	0.97	1	0	0	0.264	1	0.998
Cyc1	Ndufs2	5017751	5016267	10090.ENSMUSP00000023210	10090.ENSMUSP00000013737	0	0	0	0	0.912	0.664	1	0.9	1	0.465	1	0.998
Rpl11	Rps18	5030979	5016094	10090.ENSMUSP00000099595	10090.ENSMUSP00000008812	0.113	0	0	0	0.646	0.929	1	0.9	1	0.454	1	0.998
Uba52	Rps3a1	5034113	5019462	10090.ENSMUSP00000120096	10090.ENSMUSP00000029722	0	0	0	0	0.702	0.945	1	0.9	1	0.068	1	0.998
Psmd1	Psmd6	5018807	5017456	10090.ENSMUSP00000027432	10090.ENSMUSP00000022256	0	0	0	0	0.736	0.797	1	0.9	1	0.797	1	0.998
Rpl30	Rplp2	5032315	5028293	10090.ENSMUSP00000106014	10090.ENSMUSP00000081474	0	0	0	0	0.921	0.842	1	0.9	1	0.195	1	0.998
Rpl30	Rpl34	5032315	5028844	10090.ENSMUSP00000106014	10090.ENSMUSP00000086614	0	0	0	0	0.869	0.801	1	0.9	1	0.469	1	0.998
Rpl23	Rpl4	5030904	5021039	10090.ENSMUSP00000099435	10090.ENSMUSP00000034966	0.17	0	0	0	0.91	0.84	1	0.9	1	0.274	1	0.998
Rpl27	Rps17	5029225	5028013	10090.ENSMUSP00000090305	10090.ENSMUSP00000079628	0	0	0	0	0.927	0.958	1	0	0	0.677	1	0.998
Rpl27	Rps29	5029225	5021660	10090.ENSMUSP00000090305	10090.ENSMUSP00000038352	0.088	0	0	0	0.892	0.955	1	0	0	0.677	1	0.998
Uba52	Rps8	5034113	5031065	10090.ENSMUSP00000120096	10090.ENSMUSP00000099757	0	0	0	0	0.704	0.945	1	0.9	1	0.42	1	0.998
Rps13	Rpl27	5034698	5029225	10090.ENSMUSP00000126294	10090.ENSMUSP00000090305	0	0	0	0	0.814	0.958	1	0	0	0.796	1	0.998
Rpl4	Rps14	5021039	5018277	10090.ENSMUSP00000034966	10090.ENSMUSP00000025511	0.139	0	0	0	0.882	0.845	1	0.9	1	0.456	1	0.998
Rps28	Rps27a	5033019	5031143	10090.ENSMUSP00000110013	10090.ENSMUSP00000099909	0	0	0	0	0.933	0.801	1	0.9	1	0.282	1	0.998
Psmd13	Psmc5	5018587	5017086	10090.ENSMUSP00000026560	10090.ENSMUSP00000021049	0	0	0	0	0.827	0.798	1	0.9	1	0.715	1	0.998
Rpl23	Rpl27-ps3	5030904	5029953	10090.ENSMUSP00000099435	10090.ENSMUSP00000095287	0.153	0	0	0	0.813	0.958	1	0.72	1	0.394	1	0.998
Rpl37a	Rps26	5025033	5018537	10090.ENSMUSP00000058919	10090.ENSMUSP00000026420	0	0	0	0	0.933	0.958	1	0	0	0.369	1	0.998
Rpl36a	Rps25	5032811	5027947	10090.ENSMUSP00000108837	10090.ENSMUSP00000079180	0	0	0	0	0.924	0.958	1	0	0	0.443	1	0.998
Ndufb10	Ndufv1	5022532	5022440	10090.ENSMUSP00000043543	10090.ENSMUSP00000042967	0	0	0	0	0.515	0.925	1	0.9	1	0.573	1	0.998
Rps20	Rpl37	5034139	5023036	10090.ENSMUSP00000120528	10090.ENSMUSP00000046506	0	0	0	0	0.828	0.972	1	0	0	0.675	1	0.998
Rpl22	Rps17	5034020	5028013	10090.ENSMUSP00000118787	10090.ENSMUSP00000079628	0	0	0	0	0.879	0.971	1	0	0	0.72	1	0.998
Rpl30	Rps2	5032315	5029538	10090.ENSMUSP00000106014	10090.ENSMUSP00000092502	0	0	0	0	0.671	0.939	1	0.9	1	0.362	1	0.998
Ndufv2	Ndufa13	5034213	5032274	10090.ENSMUSP00000121557	10090.ENSMUSP00000105796	0	0	0	0	0.701	0.949	1	0.9	1	0.153	1	0.998
Uba52	Rpl19	5034113	5016512	10090.ENSMUSP00000120096	10090.ENSMUSP00000017548	0	0	0	0	0.711	0.945	1	0.9	1	0.304	1	0.998
Rpl14	Rps27a	5035620	5031143	10090.ENSMUSP00000131489	10090.ENSMUSP00000099909	0	0	0	0	0.881	0.856	1	0.9	1	0.101	1	0.998
Rps20	Rpl5	5034139	5028222	10090.ENSMUSP00000120528	10090.ENSMUSP00000080854	0.172	0	0	0	0.928	0.818	1	0	0	0.867	1	0.998
Rps3a1	Rps26	5019462	5018537	10090.ENSMUSP00000029722	10090.ENSMUSP00000026420	0	0	0	0	0.859	0.958	1	0.72	1	0.284	1	0.998
Ndufa12	Ndufv1	5036277	5022440	10090.ENSMUSP00000136313	10090.ENSMUSP00000042967	0	0	0	0	0.491	0.947	1	0.9	1	0.627	1	0.998
Uqcrc2	Cox5a	5020466	5015244	10090.ENSMUSP00000033176	10090.ENSMUSP00000000090	0	0	0	0	0.86	0.708	1	0.9	1	0.751	1	0.998
Rps8	Rpl5	5031065	5028222	10090.ENSMUSP00000099757	10090.ENSMUSP00000080854	0	0	0	0	0.939	0.849	1	0	0	0.853	1	0.998
Rpl15	Rps3	5027943	5020408	10090.ENSMUSP00000079163	10090.ENSMUSP00000032998	0	0	0.283	0	0.871	0.958	1	0	0	0.643	1	0.998
Rpl36	Rps18	5027972	5016094	10090.ENSMUSP00000079340	10090.ENSMUSP00000008812	0	0	0	0	0.666	0.929	1	0.9	1	0.381	1	0.998
Rpl30	Rpl5	5032315	5028222	10090.ENSMUSP00000106014	10090.ENSMUSP00000080854	0	0	0	0	0.892	0.868	1	0.72	1	0.762	1	0.998
Rps7	Rps21	5027079	5024953	10090.ENSMUSP00000073880	10090.ENSMUSP00000058432	0	0	0	0	0.916	0.767	1	0.9	1	0.198	1	0.998
Ndufa13	Ndufs1	5032274	5018711	10090.ENSMUSP00000105796	10090.ENSMUSP00000027111	0	0	0	0	0.258	0.954	1	0.9	1	0.521	1	0.998
Rpl15	Rpl10	5027943	5016095	10090.ENSMUSP00000079163	10090.ENSMUSP00000008826	0	0	0	0	0.861	0.944	1	0.72	1	0.221	1	0.998
Rps13	Rpl6	5034698	5020043	10090.ENSMUSP00000126294	10090.ENSMUSP00000031617	0	0	0	0	0.81	0.799	1	0.9	1	0.63	1	0.998
Uba52	Rps23	5034113	5024346	10090.ENSMUSP00000120096	10090.ENSMUSP00000054490	0	0	0	0	0.703	0.945	1	0.9	1	0.226	1	0.998
Rpl36a	Rpl18	5032811	5031793	10090.ENSMUSP00000108837	10090.ENSMUSP00000103365	0	0	0	0	0.864	0.957	1	0.72	1	0.396	1	0.998
Rpl37a	Rpl6	5025033	5020043	10090.ENSMUSP00000058919	10090.ENSMUSP00000031617	0	0	0	0	0.902	0.798	1	0.9	1	0.238	1	0.998
Rpl36a	Rps17	5032811	5028013	10090.ENSMUSP00000108837	10090.ENSMUSP00000079628	0	0	0	0	0.92	0.958	1	0	0	0.573	1	0.998
Rpl35a	Rpl36	5033146	5027972	10090.ENSMUSP00000110731	10090.ENSMUSP00000079340	0	0	0	0	0.794	0.766	1	0.9	1	0.729	1	0.998
Rpl38	Rpl3	5031605	5028126	10090.ENSMUSP00000102213	10090.ENSMUSP00000080354	0	0	0	0	0.811	0.856	1	0.9	1	0.623	1	0.998
Rpl27	Rps14	5029225	5018277	10090.ENSMUSP00000090305	10090.ENSMUSP00000025511	0.107	0	0	0	0.933	0.958	1	0	0	0.548	1	0.998
Rps16	Rpl37a	5031918	5025033	10090.ENSMUSP00000103940	10090.ENSMUSP00000058919	0	0	0	0	0.943	0.97	1	0	0	0.35	1	0.998
Rpl18	Rps7	5031793	5027079	10090.ENSMUSP00000103365	10090.ENSMUSP00000073880	0	0	0	0	0.916	0.767	1	0.9	1	0.235	1	0.998
Rpl36al	Rpl18	5032361	5031793	10090.ENSMUSP00000106249	10090.ENSMUSP00000103365	0	0	0	0	0.859	0.957	1	0.72	1	0.396	1	0.998
Uba52	Rps9	5034113	5015940	10090.ENSMUSP00000120096	10090.ENSMUSP00000006496	0	0	0	0	0.713	0.945	1	0.9	1	0.189	1	0.998
Rps20	Rpl32	5034139	5028158	10090.ENSMUSP00000120528	10090.ENSMUSP00000080523	0	0	0	0	0.911	0.971	1	0	0	0.41	1	0.998
Rps10	Rps28	5033114	5033019	10090.ENSMUSP00000110532	10090.ENSMUSP00000110013	0	0	0	0	0.827	0.945	1	0.72	1	0.642	1	0.998
Rps20	Rpl23	5034139	5030904	10090.ENSMUSP00000120528	10090.ENSMUSP00000099435	0.172	0	0	0	0.908	0.971	1	0	0	0.537	1	0.998
Rpl39	Rps9	5033187	5015940	10090.ENSMUSP00000110886	10090.ENSMUSP00000006496	0.092	0	0	0	0.852	0.971	1	0	0	0.556	1	0.998
Rps27a	Rps9	5031143	5015940	10090.ENSMUSP00000099909	10090.ENSMUSP00000006496	0	0	0	0	0.881	0.896	1	0.9	1	0.161	1	0.998
Rpl27-ps3	Rpl37a	5029953	5025033	10090.ENSMUSP00000095287	10090.ENSMUSP00000058919	0	0	0	0	0.801	0.958	1	0.72	1	0.435	1	0.998
Rpl10a	Rps29	5023403	5021660	10090.ENSMUSP00000048469	10090.ENSMUSP00000038352	0.139	0	0	0	0.861	0.961	1	0.72	1	0.343	1	0.998
Uba52	Rpl22	5034113	5034020	10090.ENSMUSP00000120096	10090.ENSMUSP00000118787	0	0	0	0	0.72	0.945	1	0.9	1	0.348	1	0.998
Rpl32	Rpl10	5028158	5016095	10090.ENSMUSP00000080523	10090.ENSMUSP00000008826	0	0	0	0	0.865	0.958	1	0.72	1	0.203	1	0.998
Rpl39	Rps26	5033187	5018537	10090.ENSMUSP00000110886	10090.ENSMUSP00000026420	0.105	0	0	0	0.843	0.958	1	0.72	1	0.371	1	0.998
Uba52	Rps11	5034113	5015656	10090.ENSMUSP00000120096	10090.ENSMUSP00000003521	0	0	0	0	0.705	0.945	1	0.9	1	0.072	1	0.998
Rps26	Rps9	5018537	5015940	10090.ENSMUSP00000026420	10090.ENSMUSP00000006496	0	0	0	0	0.862	0.958	1	0.72	1	0.111	1	0.998
Uqcrc2	Ndufb8	5020466	5018490	10090.ENSMUSP00000033176	10090.ENSMUSP00000026222	0	0	0	0	0.453	0.784	1	0.9	1	0.867	1	0.998
Ndufa13	Ndufa8	5032274	5025925	10090.ENSMUSP00000105796	10090.ENSMUSP00000065352	0	0	0	0	0.85	0.884	1	0.9	1	0.17	1	0.998
Rps16	Rpl23	5031918	5030904	10090.ENSMUSP00000103940	10090.ENSMUSP00000099435	0.17	0	0	0	0.927	0.971	1	0	0	0.243	1	0.998
Rps21	Rpl4	5024953	5021039	10090.ENSMUSP00000058432	10090.ENSMUSP00000034966	0	0	0	0	0.862	0.821	1	0.9	1	0.407	1	0.998
Rps15a	Rpl39	5034103	5033187	10090.ENSMUSP00000119975	10090.ENSMUSP00000110886	0.042	0	0	0	0.912	0.971	1	0	0	0.509	1	0.998
Rps17	Rps18	5028013	5016094	10090.ENSMUSP00000079628	10090.ENSMUSP00000008812	0	0	0	0	0.826	0.95	1	0.72	1	0.539	1	0.998
Rpl36a	Rpl37	5032811	5023036	10090.ENSMUSP00000108837	10090.ENSMUSP00000046506	0	0	0	0	0.798	0.958	1	0.72	1	0.592	1	0.998
Rps25	Rpl4	5027947	5021039	10090.ENSMUSP00000079180	10090.ENSMUSP00000034966	0	0	0	0	0.882	0.829	1	0.9	1	0.541	1	0.998
Rpl14	Rpl5	5035620	5028222	10090.ENSMUSP00000131489	10090.ENSMUSP00000080854	0.153	0	0	0	0.912	0.809	1	0.72	1	0.712	1	0.998
Rpl39	Rps14	5033187	5018277	10090.ENSMUSP00000110886	10090.ENSMUSP00000025511	0.075	0	0	0	0.881	0.97	1	0	0	0.619	1	0.998
Rps19	Rpl36	5031943	5027972	10090.ENSMUSP00000104067	10090.ENSMUSP00000079340	0	0	0	0	0.881	0.768	1	0.9	1	0.634	1	0.998
Rpl27	Rps5	5029225	5015759	10090.ENSMUSP00000090305	10090.ENSMUSP00000004554	0.096	0	0	0	0.921	0.958	1	0	0	0.511	1	0.998
Rpl32	Rpl4	5028158	5021039	10090.ENSMUSP00000080523	10090.ENSMUSP00000034966	0	0	0	0	0.887	0.839	1	0.9	1	0.507	1	0.998
Psmd8	Psmd1	5023901	5018807	10090.ENSMUSP00000051657	10090.ENSMUSP00000027432	0	0	0	0	0.645	0.82	1	0.9	1	0.822	1	0.998
Rpl14	Rplp2	5035620	5028293	10090.ENSMUSP00000131489	10090.ENSMUSP00000081474	0	0	0	0	0.837	0.813	1	0.9	1	0.694	1	0.998
Rpl18	Rpl3	5031793	5028126	10090.ENSMUSP00000103365	10090.ENSMUSP00000080354	0	0	0	0	0.871	0.82	1	0.9	1	0.543	1	0.998
Rpl14	Rpl32	5035620	5028158	10090.ENSMUSP00000131489	10090.ENSMUSP00000080523	0.097	0	0	0	0.885	0.839	1	0.9	1	0.321	1	0.998
Ndufa8	Cyc1	5025925	5017751	10090.ENSMUSP00000065352	10090.ENSMUSP00000023210	0	0	0	0	0.929	0.723	1	0.9	1	0.208	1	0.998
Rpl38	Rps26	5031605	5018537	10090.ENSMUSP00000102213	10090.ENSMUSP00000026420	0	0	0	0	0.943	0.801	1	0.72	1	0.502	1	0.998
Rpl39	Rps8	5033187	5031065	10090.ENSMUSP00000110886	10090.ENSMUSP00000099757	0	0	0	0	0.941	0.97	1	0	0	0.452	1	0.998
Rps20	Rpl7	5034139	5026693	10090.ENSMUSP00000120528	10090.ENSMUSP00000071616	0.119	0	0	0	0.905	0.956	1	0	0	0.548	1	0.998
Rps20	Rps19	5034139	5031943	10090.ENSMUSP00000120528	10090.ENSMUSP00000104067	0	0	0	0	0.848	0.889	1	0.54	1	0.857	1	0.998
Rpl18	Rpl27	5031793	5029225	10090.ENSMUSP00000103365	10090.ENSMUSP00000090305	0	0	0	0	0.927	0.801	1	0.72	1	0.648	1	0.998
Rpl36al	Rpl10	5032361	5016095	10090.ENSMUSP00000106249	10090.ENSMUSP00000008826	0	0	0	0	0.719	0.945	1	0.72	1	0.62	1	0.998
Rps19	Rps18	5031943	5016094	10090.ENSMUSP00000104067	10090.ENSMUSP00000008812	0	0	0	0	0.834	0.768	1	0.9	1	0.625	1	0.998
Rps27	Rps17	5035720	5028013	10090.ENSMUSP00000132102	10090.ENSMUSP00000079628	0	0	0	0	0.78	0.958	1	0.54	1	0.692	1	0.998
Rpl36al	Rpl30	5032361	5032315	10090.ENSMUSP00000106249	10090.ENSMUSP00000106014	0	0	0	0	0.828	0.958	1	0.72	1	0.454	1	0.998
Rpl27-ps3	Rpl37	5029953	5023036	10090.ENSMUSP00000095287	10090.ENSMUSP00000046506	0.044	0	0	0	0.798	0.958	1	0.72	1	0.516	1	0.998
Fbl	Dkc1	5021545	5020634	10090.ENSMUSP00000037613	10090.ENSMUSP00000033776	0	0	0	0	0.874	0.819	1	0.54	1	0.881	1	0.998
Ndufs7	Ndufa10	5031381	5018820	10090.ENSMUSP00000101003	10090.ENSMUSP00000027478	0	0	0	0	0.684	0.849	1	0.9	1	0.654	1	0.998
Uba52	Rps27a	5034113	5031143	10090.ENSMUSP00000120096	10090.ENSMUSP00000099909	0	0	0.417	0.951	0.711	0.945	1	0.9	1	0.498	1	0.998
Rpl39	Rps5	5033187	5015759	10090.ENSMUSP00000110886	10090.ENSMUSP00000004554	0.043	0	0	0	0.889	0.971	1	0	0	0.487	1	0.998
Rps13	Rplp2	5034698	5028293	10090.ENSMUSP00000126294	10090.ENSMUSP00000081474	0	0	0	0	0.863	0.858	1	0.9	1	0.181	1	0.998
Rpl14	Rps28	5035620	5033019	10090.ENSMUSP00000131489	10090.ENSMUSP00000110013	0	0	0	0	0.85	0.799	1	0.9	1	0.586	1	0.998
Rps15a	Rpl4	5034103	5021039	10090.ENSMUSP00000119975	10090.ENSMUSP00000034966	0.17	0	0	0	0.863	0.838	1	0.9	1	0.397	1	0.998
Rpl39	Rps16	5033187	5031918	10090.ENSMUSP00000110886	10090.ENSMUSP00000103940	0.08	0	0	0	0.91	0.971	1	0	0	0.363	1	0.998
Rps24	Rps18	5034648	5016094	10090.ENSMUSP00000125977	10090.ENSMUSP00000008812	0	0	0	0	0.815	0.95	1	0.72	1	0.645	1	0.998
Rplp2	Rpl6	5028293	5020043	10090.ENSMUSP00000081474	10090.ENSMUSP00000031617	0	0	0	0	0.824	0.785	1	0.9	1	0.558	1	0.998
Rpl36a	Rps5	5032811	5015759	10090.ENSMUSP00000108837	10090.ENSMUSP00000004554	0	0	0	0	0.938	0.958	1	0	0	0.5	1	0.998
Ndufb10	Ndufb8	5022532	5018490	10090.ENSMUSP00000043543	10090.ENSMUSP00000026222	0	0	0	0	0.887	0.857	1	0.9	1	0.413	1	0.998
Rps13	Rpl27-ps3	5034698	5029953	10090.ENSMUSP00000126294	10090.ENSMUSP00000095287	0	0	0	0	0.807	0.958	1	0	0	0.797	1	0.998
Ndufs7	Cyc1	5031381	5017751	10090.ENSMUSP00000101003	10090.ENSMUSP00000023210	0	0	0	0	0.921	0.664	1	0.9	1	0.478	1	0.998
Ndufs1	Ndufb8	5018711	5018490	10090.ENSMUSP00000027111	10090.ENSMUSP00000026222	0	0	0	0	0.532	0.891	1	0.9	1	0.774	1	0.998
Rpl11	Rps17	5030979	5028013	10090.ENSMUSP00000099595	10090.ENSMUSP00000079628	0	0	0	0	0.882	0.95	1	0	0	0.782	1	0.998
Ndufa10	Ndufb9	5018820	5017677	10090.ENSMUSP00000027478	10090.ENSMUSP00000022980	0	0	0	0	0.772	0.923	1	0.9	1	0.475	1	0.998
Rps15a	Rpl6	5034103	5020043	10090.ENSMUSP00000119975	10090.ENSMUSP00000031617	0.153	0	0	0	0.832	0.794	1	0.9	1	0.665	1	0.998
Rps2	Rpl32	5029538	5028158	10090.ENSMUSP00000092502	10090.ENSMUSP00000080523	0.091	0	0	0	0.728	0.939	1	0.9	1	0.253	1	0.998
Rps15a	Rps2	5034103	5029538	10090.ENSMUSP00000119975	10090.ENSMUSP00000092502	0.127	0	0	0	0.635	0.939	1	0.9	1	0.41	1	0.998
Ndufa13	Ndufb10	5032274	5022532	10090.ENSMUSP00000105796	10090.ENSMUSP00000043543	0	0	0	0	0.873	0.884	1	0.9	1	0.215	1	0.998
Rps27	Rps29	5035720	5021660	10090.ENSMUSP00000132102	10090.ENSMUSP00000038352	0	0	0	0	0.763	0.958	1	0.54	1	0.706	1	0.998
Rplp2	Rps23	5028293	5024346	10090.ENSMUSP00000081474	10090.ENSMUSP00000054490	0	0	0	0	0.878	0.877	1	0.9	1	0.322	1	0.998
Rpl14	Rps15a	5035620	5034103	10090.ENSMUSP00000131489	10090.ENSMUSP00000119975	0.153	0	0	0	0.872	0.859	1	0.9	1	0.283	1	0.998
Ndufa12	Ndufa13	5036277	5032274	10090.ENSMUSP00000136313	10090.ENSMUSP00000105796	0	0	0	0	0.822	0.93	1	0.9	1	0.204	1	0.998
Rpl30	Rpl10	5032315	5016095	10090.ENSMUSP00000106014	10090.ENSMUSP00000008826	0	0	0	0	0.766	0.958	1	0.72	1	0.383	1	0.998
Rpl38	Rpl6	5031605	5020043	10090.ENSMUSP00000102213	10090.ENSMUSP00000031617	0	0	0	0	0.861	0.799	1	0.9	1	0.49	1	0.998
Uba52	Rpl37	5034113	5023036	10090.ENSMUSP00000120096	10090.ENSMUSP00000046506	0	0	0	0	0.686	0.945	1	0.9	1	0.21	1	0.998
Rpl31	Rps21	5036727	5024953	10090.ENSMUSP00000137631	10090.ENSMUSP00000058432	0	0	0	0	0.908	0.889	1	0.72	1	0.499	1	0.998
Rpl36a	Rpl36	5032811	5027972	10090.ENSMUSP00000108837	10090.ENSMUSP00000079340	0	0	0	0	0.837	0.938	1	0.54	1	0.634	1	0.998
Rpl39	Rps3a1	5033187	5019462	10090.ENSMUSP00000110886	10090.ENSMUSP00000029722	0	0	0	0	0.907	0.97	1	0	0	0.561	1	0.998
Psmd13	Psmc6	5018587	5017492	10090.ENSMUSP00000026560	10090.ENSMUSP00000022380	0	0	0	0	0.776	0.796	1	0.9	1	0.67	1	0.998
Rpl22	Rps27a	5034020	5031143	10090.ENSMUSP00000118787	10090.ENSMUSP00000099909	0	0	0	0	0.845	0.896	1	0.9	1	0.115	1	0.998
Rps27	Rps19	5035720	5031943	10090.ENSMUSP00000132102	10090.ENSMUSP00000104067	0.154	0	0	0	0.831	0.801	1	0.9	1	0.667	1	0.998
Rpl39	Rps11	5033187	5015656	10090.ENSMUSP00000110886	10090.ENSMUSP00000003521	0.056	0	0	0	0.912	0.971	1	0	0	0.327	1	0.998
Rpl32	Rpl3	5028158	5028126	10090.ENSMUSP00000080523	10090.ENSMUSP00000080354	0.139	0	0	0	0.816	0.858	1	0.9	1	0.405	1	0.998
Rps20	Rpl39	5034139	5033187	10090.ENSMUSP00000120528	10090.ENSMUSP00000110886	0.043	0	0	0	0.882	0.971	1	0	0	0.53	1	0.998
Rpl36a	Rps8	5032811	5031065	10090.ENSMUSP00000108837	10090.ENSMUSP00000099757	0	0	0	0	0.908	0.958	1	0	0	0.62	1	0.998
Rpl36a	Rpl7	5032811	5026693	10090.ENSMUSP00000108837	10090.ENSMUSP00000071616	0	0	0	0	0.857	0.957	1	0.72	1	0.432	1	0.998
Rpl15	Rps14	5027943	5018277	10090.ENSMUSP00000079163	10090.ENSMUSP00000025511	0	0	0.299	0	0.872	0.958	1	0	0	0.673	1	0.998
Rps23	Rpl6	5024346	5020043	10090.ENSMUSP00000054490	10090.ENSMUSP00000031617	0.088	0	0	0	0.862	0.799	1	0.9	1	0.571	1	0.998
Rpl32	Rps29	5028158	5021660	10090.ENSMUSP00000080523	10090.ENSMUSP00000038352	0.139	0	0	0	0.906	0.962	1	0.36	1	0.276	1	0.998
Rps15a	Rplp2	5034103	5028293	10090.ENSMUSP00000119975	10090.ENSMUSP00000081474	0	0	0	0	0.881	0.865	1	0.9	1	0.28	1	0.998
Rps8	Rps2	5031065	5029538	10090.ENSMUSP00000099757	10090.ENSMUSP00000092502	0	0	0	0	0.847	0.71	1	0.9	1	0.699	1	0.998
Rpl18	Rpl36	5031793	5027972	10090.ENSMUSP00000103365	10090.ENSMUSP00000079340	0	0	0	0	0.865	0.748	1	0.9	1	0.64	1	0.998
Rps17	Rpl10a	5028013	5023403	10090.ENSMUSP00000079628	10090.ENSMUSP00000048469	0	0	0	0	0.931	0.971	1	0	0	0.446	1	0.998
Rps13	Rps26	5034698	5018537	10090.ENSMUSP00000126294	10090.ENSMUSP00000026420	0	0	0	0	0.799	0.958	1	0.72	1	0.344	1	0.998
Rpl31	Rps6	5036727	5031125	10090.ENSMUSP00000137631	10090.ENSMUSP00000099878	0	0	0	0	0.881	0.97	1	0	0	0.638	1	0.998
Rps21	Rpl37	5024953	5023036	10090.ENSMUSP00000058432	10090.ENSMUSP00000046506	0	0	0	0	0.847	0.894	1	0.9	1	0.059	1	0.998
Rps10	Rpl8	5033114	5015714	10090.ENSMUSP00000110532	10090.ENSMUSP00000004072	0	0	0	0	0.933	0.958	1	0	0	0.429	1	0.998
Ndufv1	Ndufab1	5022440	5020457	10090.ENSMUSP00000042967	10090.ENSMUSP00000033157	0	0	0	0	0.145	0.97	1	0.9	1	0.54	1	0.998
Ndufa13	Ndufs4	5032274	5017465	10090.ENSMUSP00000105796	10090.ENSMUSP00000022286	0	0	0	0	0.802	0.937	1	0.9	1	0.278	1	0.998
Rps20	Rps7	5034139	5027079	10090.ENSMUSP00000120528	10090.ENSMUSP00000073880	0	0	0	0	0.825	0.95	1	0.72	1	0.439	1	0.998
Rps27	Rpl36	5035720	5027972	10090.ENSMUSP00000132102	10090.ENSMUSP00000079340	0	0	0	0	0.731	0.938	1	0.9	1	0.285	1	0.998
Rplp2	Rps5	5028293	5015759	10090.ENSMUSP00000081474	10090.ENSMUSP00000004554	0	0	0	0	0.879	0.859	1	0.9	1	0.285	1	0.998
Rps27a	Rpl4	5031143	5021039	10090.ENSMUSP00000099909	10090.ENSMUSP00000034966	0	0	0	0	0.881	0.819	1	0.9	1	0.215	1	0.998
Rpl34	Rps3	5028844	5020408	10090.ENSMUSP00000086614	10090.ENSMUSP00000032998	0.172	0	0	0	0.862	0.801	1	0.9	1	0.425	1	0.998
Rpl32	Rps26	5028158	5018537	10090.ENSMUSP00000080523	10090.ENSMUSP00000026420	0	0	0	0	0.93	0.958	1	0.36	1	0.178	1	0.998
Rpl15	Rps11	5027943	5015656	10090.ENSMUSP00000079163	10090.ENSMUSP00000003521	0	0	0.244	0	0.928	0.958	1	0	0	0.227	1	0.998
Uba52	Rpl30	5034113	5032315	10090.ENSMUSP00000120096	10090.ENSMUSP00000106014	0	0	0	0	0.731	0.945	1	0.9	1	0.256	1	0.998
Rpl18	Rplp2	5031793	5028293	10090.ENSMUSP00000103365	10090.ENSMUSP00000081474	0	0	0	0	0.884	0.843	1	0.9	1	0.301	1	0.998
Psmc4	Psmd13	5020351	5018587	10090.ENSMUSP00000032824	10090.ENSMUSP00000026560	0	0	0	0	0.808	0.797	1	0.9	1	0.76	1	0.998
Rpl36a	Rpl10	5032811	5016095	10090.ENSMUSP00000108837	10090.ENSMUSP00000008826	0	0	0	0	0.843	0.945	1	0.72	1	0.619	1	0.998
Rpl34	Rpl8	5028844	5015714	10090.ENSMUSP00000086614	10090.ENSMUSP00000004072	0.161	0	0	0	0.905	0.801	1	0.9	1	0.319	1	0.998
Uba52	Rpl8	5034113	5015714	10090.ENSMUSP00000120096	10090.ENSMUSP00000004072	0	0	0	0	0.711	0.945	1	0.9	1	0.171	1	0.998
Rpl37a	Rpl10	5025033	5016095	10090.ENSMUSP00000058919	10090.ENSMUSP00000008826	0	0	0	0	0.879	0.952	1	0.72	1	0.059	1	0.998
Rpl34	Rps14	5028844	5018277	10090.ENSMUSP00000086614	10090.ENSMUSP00000025511	0	0	0	0	0.865	0.801	1	0.9	1	0.536	1	0.998
Rpl36al	Rpl15	5032361	5027943	10090.ENSMUSP00000106249	10090.ENSMUSP00000079163	0	0	0	0	0.736	0.945	1	0.72	1	0.692	1	0.998
Rps27	Rps24	5035720	5034648	10090.ENSMUSP00000132102	10090.ENSMUSP00000125977	0	0	0	0	0.769	0.954	1	0.54	1	0.749	1	0.998
Rpl22	Rpl27-ps3	5034020	5029953	10090.ENSMUSP00000118787	10090.ENSMUSP00000095287	0	0	0	0	0.806	0.958	1	0.72	1	0.591	1	0.998
Rpl5	Rps3	5028222	5020408	10090.ENSMUSP00000080854	10090.ENSMUSP00000032998	0.193	0	0	0	0.934	0.819	1	0	0	0.86	1	0.998
Rps20	Rps18	5034139	5016094	10090.ENSMUSP00000120528	10090.ENSMUSP00000008812	0.139	0	0	0	0.776	0.95	1	0.72	1	0.486	1	0.998
Uqcrc2	Ndufs1	5020466	5018711	10090.ENSMUSP00000033176	10090.ENSMUSP00000027111	0	0	0	0	0.878	0.784	1	0.9	1	0.522	1	0.998
Rpl36	Rps21	5027972	5024953	10090.ENSMUSP00000079340	10090.ENSMUSP00000058432	0	0	0	0	0.901	0.762	1	0.9	1	0.535	1	0.998
Rps28	Rpl18	5033019	5031793	10090.ENSMUSP00000110013	10090.ENSMUSP00000103365	0	0	0	0	0.864	0.8	1	0.9	1	0.572	1	0.998
Rpl38	Rps9	5031605	5015940	10090.ENSMUSP00000102213	10090.ENSMUSP00000006496	0	0	0	0	0.881	0.896	1	0.9	1	0.23	1	0.998
Rpl36al	Rpl32	5032361	5028158	10090.ENSMUSP00000106249	10090.ENSMUSP00000080523	0	0	0	0	0.861	0.958	1	0.72	1	0.225	1	0.998
Rps27	Rps20	5035720	5034139	10090.ENSMUSP00000132102	10090.ENSMUSP00000120528	0	0	0	0	0.815	0.958	1	0.54	1	0.603	1	0.998
Rpl7	Rpl37	5026693	5023036	10090.ENSMUSP00000071616	10090.ENSMUSP00000046506	0	0	0	0	0.746	0.961	1	0.72	1	0.622	1	0.998
Rpl32	Rps17	5028158	5028013	10090.ENSMUSP00000080523	10090.ENSMUSP00000079628	0	0	0	0	0.937	0.971	1	0	0	0.417	1	0.998
Rpl38	Rps7	5031605	5027079	10090.ENSMUSP00000102213	10090.ENSMUSP00000073880	0	0	0	0	0.886	0.768	1	0.9	1	0.399	1	0.998
Rpl38	Rps17	5031605	5028013	10090.ENSMUSP00000102213	10090.ENSMUSP00000079628	0	0	0	0	0.937	0.896	1	0	0	0.766	1	0.998
Rplp2	Rps9	5028293	5015940	10090.ENSMUSP00000081474	10090.ENSMUSP00000006496	0	0	0	0	0.878	0.856	1	0.9	1	0.297	1	0.998
Rpl11	Rpl36	5030979	5027972	10090.ENSMUSP00000099595	10090.ENSMUSP00000079340	0	0	0	0	0.593	0.929	1	0.9	1	0.643	1	0.998
Rpl31	Rpl36al	5036727	5032361	10090.ENSMUSP00000137631	10090.ENSMUSP00000106249	0	0	0	0	0.817	0.958	1	0.72	1	0.566	1	0.998
Rps13	Rps10	5034698	5033114	10090.ENSMUSP00000126294	10090.ENSMUSP00000110532	0	0	0	0	0.787	0.958	1	0.72	1	0.499	1	0.998
Rpl27	Rpl37	5029225	5023036	10090.ENSMUSP00000090305	10090.ENSMUSP00000046506	0.044	0	0	0	0.795	0.958	1	0.72	1	0.498	1	0.998
Rpl31	Rps3	5036727	5020408	10090.ENSMUSP00000137631	10090.ENSMUSP00000032998	0	0	0	0	0.914	0.97	1	0	0	0.545	1	0.998
Rpl31	Rps8	5036727	5031065	10090.ENSMUSP00000137631	10090.ENSMUSP00000099757	0	0	0	0	0.923	0.97	1	0	0	0.572	1	0.998
Ndufs8	Ndufa10	5027191	5018820	10090.ENSMUSP00000074600	10090.ENSMUSP00000027478	0	0	0	0	0.639	0.849	1	0.9	1	0.809	1	0.998
Rps24	Rpl15	5034648	5027943	10090.ENSMUSP00000125977	10090.ENSMUSP00000079163	0	0	0	0	0.862	0.958	1	0	0	0.819	1	0.998
Rplp2	Rpl37	5028293	5023036	10090.ENSMUSP00000081474	10090.ENSMUSP00000046506	0	0	0	0	0.826	0.879	1	0.9	1	0.398	1	0.998
Rpl34	Rpl32	5028844	5028158	10090.ENSMUSP00000086614	10090.ENSMUSP00000080523	0.164	0	0	0	0.907	0.801	1	0.9	1	0.366	1	0.998
Rpl23	Rps2	5030904	5029538	10090.ENSMUSP00000099435	10090.ENSMUSP00000092502	0.127	0	0	0	0.677	0.939	1	0.9	1	0.274	1	0.998
Rps6	Rps29	5031125	5021660	10090.ENSMUSP00000099878	10090.ENSMUSP00000038352	0	0	0	0	0.831	0.96	1	0.72	1	0.498	1	0.998
Rps13	Uba52	5034698	5034113	10090.ENSMUSP00000126294	10090.ENSMUSP00000120096	0	0	0	0	0.71	0.945	1	0.9	1	0.331	1	0.998
Rps28	Rpl34	5033019	5028844	10090.ENSMUSP00000110013	10090.ENSMUSP00000086614	0	0	0	0	0.912	0.743	1	0.9	1	0.416	1	0.998
Rps24	Rps5	5034648	5015759	10090.ENSMUSP00000125977	10090.ENSMUSP00000004554	0	0	0	0	0.885	0.889	1	0.72	1	0.585	1	0.998
Ndufv1	Ndufb8	5022440	5018490	10090.ENSMUSP00000042967	10090.ENSMUSP00000026222	0	0	0	0	0.666	0.938	1	0.9	1	0.558	1	0.998
Rpl36al	Rpl7	5032361	5026693	10090.ENSMUSP00000106249	10090.ENSMUSP00000071616	0	0	0	0	0.802	0.957	1	0.72	1	0.433	1	0.998
Rpl27-ps3	Rpl19	5029953	5016512	10090.ENSMUSP00000095287	10090.ENSMUSP00000017548	0.145	0	0	0	0.813	0.958	1	0.72	1	0.49	1	0.998
Rps10	Rps19	5033114	5031943	10090.ENSMUSP00000110532	10090.ENSMUSP00000104067	0	0	0	0	0.869	0.801	1	0.54	1	0.856	1	0.998
Rps28	Rpl4	5033019	5021039	10090.ENSMUSP00000110013	10090.ENSMUSP00000034966	0	0	0	0	0.808	0.785	1	0.9	1	0.573	1	0.998
Uba52	Rps6	5034113	5031125	10090.ENSMUSP00000120096	10090.ENSMUSP00000099878	0	0	0	0	0.72	0.945	1	0.9	1	0.28	1	0.998
Rps6	Rpl6	5031125	5020043	10090.ENSMUSP00000099878	10090.ENSMUSP00000031617	0	0	0	0	0.867	0.796	1	0.9	1	0.622	1	0.998
Rps16	Rpl10a	5031918	5023403	10090.ENSMUSP00000103940	10090.ENSMUSP00000048469	0.139	0	0	0	0.939	0.971	1	0	0	0.339	1	0.998
Rpl23	Rplp2	5030904	5028293	10090.ENSMUSP00000099435	10090.ENSMUSP00000081474	0	0	0	0	0.901	0.883	1	0.9	1	0.172	1	0.998
Rpl39	Rps3	5033187	5020408	10090.ENSMUSP00000110886	10090.ENSMUSP00000032998	0	0	0	0	0.881	0.97	1	0	0	0.535	1	0.998
Ndufs8	Ndufb9	5027191	5017677	10090.ENSMUSP00000074600	10090.ENSMUSP00000022980	0	0	0	0	0.832	0.869	1	0.9	1	0.47	1	0.998
Rpl18	Rps27a	5031793	5031143	10090.ENSMUSP00000103365	10090.ENSMUSP00000099909	0	0	0	0	0.903	0.888	1	0.9	1	0.168	1	0.998
Ndufa13	Ndufb9	5032274	5017677	10090.ENSMUSP00000105796	10090.ENSMUSP00000022980	0	0	0	0	0.839	0.884	1	0.9	1	0.216	1	0.998
Rpl31	Rpl10	5036727	5016095	10090.ENSMUSP00000137631	10090.ENSMUSP00000008826	0	0	0	0	0.768	0.958	1	0.72	1	0.506	1	0.998
Rps27a	Rps14	5031143	5018277	10090.ENSMUSP00000099909	10090.ENSMUSP00000025511	0	0	0	0	0.899	0.889	1	0.9	1	0.147	1	0.998
Uba52	Rpl10a	5034113	5023403	10090.ENSMUSP00000120096	10090.ENSMUSP00000048469	0	0	0	0	0.679	0.945	1	0.9	1	0.407	1	0.998
Rps20	Rpl37a	5034139	5025033	10090.ENSMUSP00000120528	10090.ENSMUSP00000058919	0	0	0	0	0.879	0.97	1	0	0	0.531	1	0.998
Cyc1	Ndufs3	5017751	5015856	10090.ENSMUSP00000023210	10090.ENSMUSP00000005647	0	0	0	0	0.912	0.781	1	0.9	1	0.439	1	0.998
Rpl27	Rpl15	5029225	5027943	10090.ENSMUSP00000090305	10090.ENSMUSP00000079163	0	0	0	0	0.857	0.945	1	0.72	1	0.399	1	0.998
Rps24	Rpl11	5034648	5030979	10090.ENSMUSP00000125977	10090.ENSMUSP00000099595	0	0	0	0	0.818	0.95	1	0	0	0.855	1	0.998
Ndufa12	Ndufs2	5036277	5016267	10090.ENSMUSP00000136313	10090.ENSMUSP00000013737	0	0	0	0	0.295	0.934	1	0.9	1	0.623	1	0.998
Rpl34	Rpl36	5028844	5027972	10090.ENSMUSP00000086614	10090.ENSMUSP00000079340	0	0	0	0	0.887	0.71	1	0.9	1	0.51	1	0.998
Rps27a	Rpl3	5031143	5028126	10090.ENSMUSP00000099909	10090.ENSMUSP00000080354	0	0	0	0	0.813	0.813	1	0.9	1	0.466	1	0.997
Rpl34	Rps23	5028844	5024346	10090.ENSMUSP00000086614	10090.ENSMUSP00000054490	0	0	0	0	0.864	0.801	1	0.9	1	0.151	1	0.997
Rpl22	Rps16	5034020	5031918	10090.ENSMUSP00000118787	10090.ENSMUSP00000103940	0	0	0	0	0.837	0.971	1	0	0	0.572	1	0.997
Rps27	Rpl18	5035720	5031793	10090.ENSMUSP00000132102	10090.ENSMUSP00000103365	0	0	0	0	0.825	0.793	1	0.9	1	0.425	1	0.997
Rpl27-ps3	Rpl15	5029953	5027943	10090.ENSMUSP00000095287	10090.ENSMUSP00000079163	0	0	0	0	0.72	0.945	1	0.72	1	0.406	1	0.997
Rpl30	Rpl6	5032315	5020043	10090.ENSMUSP00000106014	10090.ENSMUSP00000031617	0	0	0	0	0.865	0.799	1	0.9	1	0.328	1	0.997
Rpl23	Rps29	5030904	5021660	10090.ENSMUSP00000099435	10090.ENSMUSP00000038352	0.17	0	0	0	0.874	0.966	1	0	0	0.302	1	0.997
Rps24	Rpl27	5034648	5029225	10090.ENSMUSP00000125977	10090.ENSMUSP00000090305	0	0	0	0	0.869	0.958	1	0	0	0.641	1	0.997
Rpl14	Rpl11	5035620	5030979	10090.ENSMUSP00000131489	10090.ENSMUSP00000099595	0.088	0	0	0	0.77	0.752	1	0.9	1	0.562	1	0.997
Rpl36a	Rpl11	5032811	5030979	10090.ENSMUSP00000108837	10090.ENSMUSP00000099595	0	0	0	0	0.772	0.939	1	0.72	1	0.53	1	0.997
Rpl27	Rpl5	5029225	5028222	10090.ENSMUSP00000090305	10090.ENSMUSP00000080854	0.153	0	0	0	0.87	0.8	1	0.72	1	0.652	1	0.997
Rpl36al	Rpl11	5032361	5030979	10090.ENSMUSP00000106249	10090.ENSMUSP00000099595	0	0	0	0	0.697	0.939	1	0.72	1	0.532	1	0.997
Rps27a	Rps7	5031143	5027079	10090.ENSMUSP00000099909	10090.ENSMUSP00000073880	0	0	0	0	0.908	0.768	1	0.9	1	0.106	1	0.997
Rplp2	Rpl3	5028293	5028126	10090.ENSMUSP00000081474	10090.ENSMUSP00000080354	0	0	0	0	0.818	0.824	1	0.9	1	0.4	1	0.997
Rps10	Rpl32	5033114	5028158	10090.ENSMUSP00000110532	10090.ENSMUSP00000080523	0	0	0	0	0.892	0.958	1	0	0	0.412	1	0.997
Rpl37	Rpl10	5023036	5016095	10090.ENSMUSP00000046506	10090.ENSMUSP00000008826	0	0	0	0	0.686	0.958	1	0.72	1	0.304	1	0.997
Rpl27-ps3	Rps17	5029953	5028013	10090.ENSMUSP00000095287	10090.ENSMUSP00000079628	0	0	0	0	0.799	0.958	1	0	0	0.682	1	0.997
Rps16	Rpl7	5031918	5026693	10090.ENSMUSP00000103940	10090.ENSMUSP00000071616	0.098	0	0	0	0.898	0.96	1	0	0	0.504	1	0.997
Rpl5	Rpl15	5028222	5027943	10090.ENSMUSP00000080854	10090.ENSMUSP00000079163	0	0	0	0	0.894	0.799	1	0.72	1	0.68	1	0.997
Rps10	Rpl37a	5033114	5025033	10090.ENSMUSP00000110532	10090.ENSMUSP00000058919	0	0	0	0	0.902	0.958	1	0	0	0.493	1	0.997
Ndufb10	Ndufs2	5022532	5016267	10090.ENSMUSP00000043543	10090.ENSMUSP00000013737	0	0	0	0	0.257	0.934	1	0.9	1	0.565	1	0.997
Rpl36a	Rps23	5032811	5024346	10090.ENSMUSP00000108837	10090.ENSMUSP00000054490	0	0	0	0	0.841	0.958	1	0	0	0.584	1	0.997
Uba52	Rps28	5034113	5033019	10090.ENSMUSP00000120096	10090.ENSMUSP00000110013	0	0	0	0	0.59	0.932	1	0.9	1	0.078	1	0.997
Rps20	Rpl27-ps3	5034139	5029953	10090.ENSMUSP00000120528	10090.ENSMUSP00000095287	0.107	0	0	0	0.814	0.958	1	0	0	0.674	1	0.997
Rps2	Rps5	5029538	5015759	10090.ENSMUSP00000092502	10090.ENSMUSP00000004554	0.091	0	0	0	0.766	0.71	1	0.9	1	0.657	1	0.997
Rpl36	Rpl6	5027972	5020043	10090.ENSMUSP00000079340	10090.ENSMUSP00000031617	0	0	0	0	0.829	0.706	1	0.9	1	0.475	1	0.997
Rpl18	Rps26	5031793	5018537	10090.ENSMUSP00000103365	10090.ENSMUSP00000026420	0	0	0	0	0.915	0.801	1	0.72	1	0.578	1	0.997
Rpl23	Rps26	5030904	5018537	10090.ENSMUSP00000099435	10090.ENSMUSP00000026420	0	0	0	0	0.912	0.958	1	0	0	0.267	1	0.997
Rps10	Rpl30	5033114	5032315	10090.ENSMUSP00000110532	10090.ENSMUSP00000106014	0	0	0	0	0.797	0.958	1	0	0	0.701	1	0.997
Rpl18	Rps17	5031793	5028013	10090.ENSMUSP00000103365	10090.ENSMUSP00000079628	0	0	0	0	0.939	0.887	1	0	0	0.667	1	0.997
Rpl11	Rps21	5030979	5024953	10090.ENSMUSP00000099595	10090.ENSMUSP00000058432	0	0	0	0	0.857	0.767	1	0.9	1	0.344	1	0.997
Rpl14	Rpl39	5035620	5033187	10090.ENSMUSP00000131489	10090.ENSMUSP00000110886	0	0	0	0	0.875	0.794	1	0.72	1	0.739	1	0.997
Rpl22	Rpl7	5034020	5026693	10090.ENSMUSP00000118787	10090.ENSMUSP00000071616	0	0	0	0	0.838	0.842	1	0.72	1	0.747	1	0.997
Rps19	Rpl34	5031943	5028844	10090.ENSMUSP00000104067	10090.ENSMUSP00000086614	0	0	0	0	0.867	0.801	1	0.9	1	0.273	1	0.997
Ndufa12	Ndufs1	5036277	5018711	10090.ENSMUSP00000136313	10090.ENSMUSP00000027111	0	0	0	0	0.184	0.948	1	0.9	1	0.531	1	0.997
Rps2	Rps3	5029538	5020408	10090.ENSMUSP00000092502	10090.ENSMUSP00000032998	0.127	0	0	0	0.705	0.707	1	0.9	1	0.696	1	0.997
Uqcrc2	Ndufs3	5020466	5015856	10090.ENSMUSP00000033176	10090.ENSMUSP00000005647	0	0	0	0	0.712	0.784	1	0.9	1	0.63	1	0.997
Rpl39	Rps17	5033187	5028013	10090.ENSMUSP00000110886	10090.ENSMUSP00000079628	0	0	0	0	0.906	0.971	1	0	0	0.303	1	0.997
Rpl31	Rps19	5036727	5031943	10090.ENSMUSP00000137631	10090.ENSMUSP00000104067	0.193	0	0	0	0.918	0.889	1	0	0	0.697	1	0.997
Rps28	Rpl3	5033019	5028126	10090.ENSMUSP00000110013	10090.ENSMUSP00000080354	0	0	0	0	0.799	0.768	1	0.9	1	0.613	1	0.997
Rpl36a	Rps29	5032811	5021660	10090.ENSMUSP00000108837	10090.ENSMUSP00000038352	0	0	0	0	0.873	0.958	1	0	0	0.543	1	0.997
Rps24	Rpl37	5034648	5023036	10090.ENSMUSP00000125977	10090.ENSMUSP00000046506	0	0	0	0	0.828	0.97	1	0	0	0.632	1	0.997
Psmd1	Psmd13	5018807	5018587	10090.ENSMUSP00000027432	10090.ENSMUSP00000026560	0	0	0	0	0.411	0.796	1	0.9	1	0.801	1	0.997
Rpl31	Rps9	5036727	5015940	10090.ENSMUSP00000137631	10090.ENSMUSP00000006496	0	0	0	0	0.875	0.971	1	0	0	0.367	1	0.997
Rps19	Rps29	5031943	5021660	10090.ENSMUSP00000104067	10090.ENSMUSP00000038352	0	0	0	0	0.862	0.851	1	0.54	1	0.805	1	0.997
Rpl22	Rps10	5034020	5033114	10090.ENSMUSP00000118787	10090.ENSMUSP00000110532	0	0	0	0	0.803	0.958	1	0	0	0.711	1	0.997
Rpl14	Rps18	5035620	5016094	10090.ENSMUSP00000131489	10090.ENSMUSP00000008812	0.088	0	0	0	0.785	0.764	1	0.9	1	0.59	1	0.997
Rps27	Rpl3	5035720	5028126	10090.ENSMUSP00000132102	10090.ENSMUSP00000080354	0	0	0	0	0.808	0.796	1	0.9	1	0.484	1	0.997
Rpl22	Rpl34	5034020	5028844	10090.ENSMUSP00000118787	10090.ENSMUSP00000086614	0	0	0	0	0.828	0.801	1	0.9	1	0.286	1	0.997
Rps15a	Rpl34	5034103	5028844	10090.ENSMUSP00000119975	10090.ENSMUSP00000086614	0.172	0	0	0	0.831	0.801	1	0.9	1	0.263	1	0.997
Rps16	Rps2	5031918	5029538	10090.ENSMUSP00000103940	10090.ENSMUSP00000092502	0.076	0	0	0	0.723	0.939	1	0.72	1	0.553	1	0.997
Rpl34	Rps3a1	5028844	5019462	10090.ENSMUSP00000086614	10090.ENSMUSP00000029722	0	0	0	0	0.871	0.801	1	0.9	1	0.22	1	0.997
Rps27	Rps26	5035720	5018537	10090.ENSMUSP00000132102	10090.ENSMUSP00000026420	0	0	0	0	0.732	0.945	1	0.54	1	0.718	1	0.997
Rps27a	Rps29	5031143	5021660	10090.ENSMUSP00000099909	10090.ENSMUSP00000038352	0	0	0	0	0.903	0.896	1	0.72	1	0.3	1	0.997
Rps13	Rpl39	5034698	5033187	10090.ENSMUSP00000126294	10090.ENSMUSP00000110886	0.092	0	0	0	0.873	0.97	1	0	0	0.411	1	0.997
Rpl36al	Rps17	5032361	5028013	10090.ENSMUSP00000106249	10090.ENSMUSP00000079628	0	0	0	0	0.894	0.958	1	0	0	0.574	1	0.997
Rps20	Rps2	5034139	5029538	10090.ENSMUSP00000120528	10090.ENSMUSP00000092502	0.091	0	0	0	0.651	0.938	1	0.72	1	0.544	1	0.997
Rps27	Rps16	5035720	5031918	10090.ENSMUSP00000132102	10090.ENSMUSP00000103940	0	0	0	0	0.858	0.958	1	0.54	1	0.315	1	0.997
Rpl34	Rpl4	5028844	5021039	10090.ENSMUSP00000086614	10090.ENSMUSP00000034966	0	0	0	0	0.82	0.786	1	0.9	1	0.525	1	0.997
Rps8	Rpl27	5031065	5029225	10090.ENSMUSP00000099757	10090.ENSMUSP00000090305	0	0	0	0	0.916	0.958	1	0	0	0.319	1	0.997
Rpl15	Rps3a1	5027943	5019462	10090.ENSMUSP00000079163	10090.ENSMUSP00000029722	0.134	0	0.292	0	0.865	0.958	1	0	0	0.415	1	0.997
Rpl7	Rps5	5026693	5015759	10090.ENSMUSP00000071616	10090.ENSMUSP00000004554	0.119	0	0	0	0.941	0.836	1	0	0	0.715	1	0.997
Rpl27	Rps25	5029225	5027947	10090.ENSMUSP00000090305	10090.ENSMUSP00000079180	0	0	0	0	0.873	0.958	1	0	0	0.62	1	0.997
Rpl34	Rplp2	5028844	5028293	10090.ENSMUSP00000086614	10090.ENSMUSP00000081474	0	0	0	0	0.854	0.799	1	0.9	1	0.313	1	0.997
Rpl34	Rpl3	5028844	5028126	10090.ENSMUSP00000086614	10090.ENSMUSP00000080354	0.132	0	0	0	0.817	0.799	1	0.9	1	0.291	1	0.997
Rpl36al	Rps8	5032361	5031065	10090.ENSMUSP00000106249	10090.ENSMUSP00000099757	0	0	0	0	0.849	0.958	1	0	0	0.624	1	0.997
Rpl5	Rps17	5028222	5028013	10090.ENSMUSP00000080854	10090.ENSMUSP00000079628	0	0	0	0	0.867	0.862	1	0	0	0.885	1	0.997
Rpl11	Rpl27	5030979	5029225	10090.ENSMUSP00000099595	10090.ENSMUSP00000090305	0.088	0	0	0	0.779	0.939	1	0.72	1	0.496	1	0.997
Rps2	Rps18	5029538	5016094	10090.ENSMUSP00000092502	10090.ENSMUSP00000008812	0.076	0	0	0	0.53	0.917	1	0.9	1	0.437	1	0.997
Rps2	Rpl37	5029538	5023036	10090.ENSMUSP00000092502	10090.ENSMUSP00000046506	0	0	0	0	0.513	0.938	1	0.9	1	0.304	1	0.997
Rpl10	Rps11	5016095	5015656	10090.ENSMUSP00000008826	10090.ENSMUSP00000003521	0.139	0	0	0	0.911	0.958	1	0	0	0.319	1	0.997
Rpl11	Rps2	5030979	5029538	10090.ENSMUSP00000099595	10090.ENSMUSP00000092502	0.076	0	0	0	0.517	0.917	1	0.9	1	0.415	1	0.997
Rpl37a	Rps29	5025033	5021660	10090.ENSMUSP00000058919	10090.ENSMUSP00000038352	0	0	0	0	0.934	0.96	1	0	0	0.122	1	0.997
Rpl22	Rps29	5034020	5021660	10090.ENSMUSP00000118787	10090.ENSMUSP00000038352	0	0	0	0	0.825	0.962	1	0	0	0.644	1	0.997
Rps27	Uba52	5035720	5034113	10090.ENSMUSP00000132102	10090.ENSMUSP00000120096	0	0	0	0	0.54	0.932	1	0.9	1	0.225	1	0.997
Rpl36a	Rpl38	5032811	5031605	10090.ENSMUSP00000108837	10090.ENSMUSP00000102213	0	0	0	0	0.906	0.801	1	0.72	1	0.535	1	0.997
Rps27	Rpl4	5035720	5021039	10090.ENSMUSP00000132102	10090.ENSMUSP00000034966	0	0	0	0	0.751	0.79	1	0.9	1	0.527	1	0.997
Rpl36a	Rps11	5032811	5015656	10090.ENSMUSP00000108837	10090.ENSMUSP00000003521	0	0	0	0	0.905	0.958	1	0	0	0.486	1	0.997
Ndufa9	Cyc1	5028727	5017751	10090.ENSMUSP00000085523	10090.ENSMUSP00000023210	0	0	0	0	0.899	0.664	1	0.9	1	0.355	1	0.997
Rps20	Rpl11	5034139	5030979	10090.ENSMUSP00000120528	10090.ENSMUSP00000099595	0.139	0	0	0	0.815	0.95	1	0	0	0.736	1	0.997
Rpl27	Rps26	5029225	5018537	10090.ENSMUSP00000090305	10090.ENSMUSP00000026420	0	0	0	0	0.909	0.945	1	0	0	0.458	1	0.997
Rps24	Rpl39	5034648	5033187	10090.ENSMUSP00000125977	10090.ENSMUSP00000110886	0	0	0	0	0.844	0.962	1	0	0	0.609	1	0.997
Rpl31	Rpl34	5036727	5028844	10090.ENSMUSP00000137631	10090.ENSMUSP00000086614	0	0	0	0	0.872	0.801	1	0.72	1	0.661	1	0.997
Rps16	Rps27a	5031918	5031143	10090.ENSMUSP00000103940	10090.ENSMUSP00000099909	0	0	0	0	0.91	0.896	1	0.72	1	0	0	0.997
Rps24	Rpl36al	5034648	5032361	10090.ENSMUSP00000125977	10090.ENSMUSP00000106249	0	0	0	0	0.815	0.958	1	0	0	0.653	1	0.997
Rps6	Rpl15	5031125	5027943	10090.ENSMUSP00000099878	10090.ENSMUSP00000079163	0	0	0	0	0.854	0.958	1	0	0	0.596	1	0.997
Rps27a	Rpl36	5031143	5027972	10090.ENSMUSP00000099909	10090.ENSMUSP00000079340	0	0	0	0	0.854	0.766	1	0.9	1	0.254	1	0.997
Rpl15	Rps26	5027943	5018537	10090.ENSMUSP00000079163	10090.ENSMUSP00000026420	0	0	0	0	0.874	0.945	1	0	0	0.71	1	0.997
Rpl34	Rps9	5028844	5015940	10090.ENSMUSP00000086614	10090.ENSMUSP00000006496	0	0	0	0	0.824	0.801	1	0.9	1	0.376	1	0.997
Rpl14	Rpl15	5035620	5027943	10090.ENSMUSP00000131489	10090.ENSMUSP00000079163	0	0	0	0	0.831	0.8	1	0.72	1	0.729	1	0.997
Rps16	Rps7	5031918	5027079	10090.ENSMUSP00000103940	10090.ENSMUSP00000073880	0	0	0	0	0.849	0.95	1	0.72	1	0.077	1	0.997
Ndufa13	Ndufs2	5032274	5016267	10090.ENSMUSP00000105796	10090.ENSMUSP00000013737	0	0	0	0	0.408	0.951	1	0.9	1	0.361	1	0.997
Rpl3	Rps18	5028126	5016094	10090.ENSMUSP00000080354	10090.ENSMUSP00000008812	0.113	0	0	0	0.816	0.765	1	0.9	1	0.503	1	0.997
Rpl39	Rps6	5033187	5031125	10090.ENSMUSP00000110886	10090.ENSMUSP00000099878	0	0	0	0	0.882	0.97	1	0	0	0.317	1	0.997
Rpl15	Rps29	5027943	5021660	10090.ENSMUSP00000079163	10090.ENSMUSP00000038352	0	0	0	0	0.796	0.958	1	0	0	0.687	1	0.997
Rpl22	Rplp2	5034020	5028293	10090.ENSMUSP00000118787	10090.ENSMUSP00000081474	0	0	0	0	0.826	0.819	1	0.9	1	0.241	1	0.997
Rpl38	Rpl4	5031605	5021039	10090.ENSMUSP00000102213	10090.ENSMUSP00000034966	0	0	0	0	0.858	0.819	1	0.9	1	0.309	1	0.997
Rpl36al	Rps3a1	5032361	5019462	10090.ENSMUSP00000106249	10090.ENSMUSP00000029722	0	0	0	0	0.808	0.958	1	0	0	0.685	1	0.997
Rps10	Rpl27	5033114	5029225	10090.ENSMUSP00000110532	10090.ENSMUSP00000090305	0	0	0	0	0.876	0.945	1	0	0	0.716	1	0.997
Rpl38	Rpl27	5031605	5029225	10090.ENSMUSP00000102213	10090.ENSMUSP00000090305	0	0	0	0	0.93	0.801	1	0.72	1	0.522	1	0.997
Rpl27	Rpl36	5029225	5027972	10090.ENSMUSP00000090305	10090.ENSMUSP00000079340	0	0	0	0	0.876	0.939	1	0.54	1	0.438	1	0.997
Psmd8	Psmd6	5023901	5017456	10090.ENSMUSP00000051657	10090.ENSMUSP00000022256	0	0	0	0	0.74	0.805	1	0.9	1	0.647	1	0.997
Rps20	Rps27a	5034139	5031143	10090.ENSMUSP00000120528	10090.ENSMUSP00000099909	0	0	0	0	0.885	0.896	1	0.72	1	0.221	1	0.997
Rps24	Rpl36a	5034648	5032811	10090.ENSMUSP00000125977	10090.ENSMUSP00000108837	0	0	0	0	0.863	0.958	1	0	0	0.653	1	0.997
Rpl34	Rpl6	5028844	5020043	10090.ENSMUSP00000086614	10090.ENSMUSP00000031617	0.107	0	0	0	0.815	0.735	1	0.9	1	0.548	1	0.997
Psmc2	Psmd13	5019763	5018587	10090.ENSMUSP00000030769	10090.ENSMUSP00000026560	0	0	0	0	0.811	0.793	1	0.9	1	0.528	1	0.997
Uba52	Rpl36	5034113	5027972	10090.ENSMUSP00000120096	10090.ENSMUSP00000079340	0	0	0	0	0.506	0.923	1	0.9	1	0.386	1	0.997
Rpl31	Rps10	5036727	5033114	10090.ENSMUSP00000137631	10090.ENSMUSP00000110532	0	0	0	0	0.81	0.958	1	0	0	0.741	1	0.997
Rpl14	Rpl36	5035620	5027972	10090.ENSMUSP00000131489	10090.ENSMUSP00000079340	0	0	0	0	0.814	0.744	1	0.9	1	0.501	1	0.997
Rpl11	Rpl15	5030979	5027943	10090.ENSMUSP00000099595	10090.ENSMUSP00000079163	0	0	0	0	0.699	0.939	1	0.72	1	0.569	1	0.997
Rpl37	Rpl4	5023036	5021039	10090.ENSMUSP00000046506	10090.ENSMUSP00000034966	0	0	0	0	0.812	0.806	1	0.9	1	0.46	1	0.997
Rpl34	Rps7	5028844	5027079	10090.ENSMUSP00000086614	10090.ENSMUSP00000073880	0	0	0	0	0.893	0.711	1	0.9	1	0.259	1	0.997
Rpl39	Rpl11	5033187	5030979	10090.ENSMUSP00000110886	10090.ENSMUSP00000099595	0.044	0	0	0	0.749	0.95	1	0.72	1	0.412	1	0.997
Rps10	Rps18	5033114	5016094	10090.ENSMUSP00000110532	10090.ENSMUSP00000008812	0	0	0	0	0.674	0.939	1	0.72	1	0.562	1	0.997
Rps27a	Huwe1	5031143	5018510	10090.ENSMUSP00000099909	10090.ENSMUSP00000026292	0	0	0	0	0.062	0.977	1	0.9	1	0.107	1	0.997
Rps24	Rpl38	5034648	5031605	10090.ENSMUSP00000125977	10090.ENSMUSP00000102213	0	0	0	0	0.91	0.889	1	0	0	0.794	1	0.997
Rps26	Rps18	5018537	5016094	10090.ENSMUSP00000026420	10090.ENSMUSP00000008812	0	0	0	0	0.735	0.939	1	0.72	1	0.449	1	0.997
Rps20	Rpl27	5034139	5029225	10090.ENSMUSP00000120528	10090.ENSMUSP00000090305	0.107	0	0	0	0.853	0.958	1	0	0	0.662	1	0.997
Rpl32	Rpl6	5028158	5020043	10090.ENSMUSP00000080523	10090.ENSMUSP00000031617	0.097	0	0	0	0.875	0.798	1	0.9	1	0.209	1	0.997
Rpl27	Rpl10	5029225	5016095	10090.ENSMUSP00000090305	10090.ENSMUSP00000008826	0.074	0	0	0	0.776	0.945	1	0.72	1	0.322	1	0.997
Rps6	Rpl34	5031125	5028844	10090.ENSMUSP00000099878	10090.ENSMUSP00000086614	0	0	0	0	0.852	0.801	1	0.9	1	0.233	1	0.997
Rpl37	Rpl6	5023036	5020043	10090.ENSMUSP00000046506	10090.ENSMUSP00000031617	0.044	0	0	0	0.803	0.775	1	0.9	1	0.599	1	0.997
Rps21	Rps18	5024953	5016094	10090.ENSMUSP00000058432	10090.ENSMUSP00000008812	0	0	0	0	0.851	0.767	1	0.9	1	0.251	1	0.997
Uba52	Rps7	5034113	5027079	10090.ENSMUSP00000120096	10090.ENSMUSP00000073880	0	0	0	0	0.527	0.923	1	0.9	1	0.306	1	0.997
Rpl38	Rpl7	5031605	5026693	10090.ENSMUSP00000102213	10090.ENSMUSP00000071616	0	0	0	0	0.875	0.852	1	0.72	1	0.614	1	0.997
Rps28	Rpl6	5033019	5020043	10090.ENSMUSP00000110013	10090.ENSMUSP00000031617	0	0	0	0	0.896	0.688	1	0.9	1	0.267	1	0.997
Rps25	Rpl15	5027947	5027943	10090.ENSMUSP00000079180	10090.ENSMUSP00000079163	0	0	0	0	0.87	0.958	1	0	0	0.617	1	0.997
Rps21	Rps26	5024953	5018537	10090.ENSMUSP00000058432	10090.ENSMUSP00000026420	0	0	0	0	0.925	0.801	1	0.72	1	0.426	1	0.997
Rpl11	Rpl27-ps3	5030979	5029953	10090.ENSMUSP00000099595	10090.ENSMUSP00000095287	0.088	0	0	0	0.672	0.939	1	0.72	1	0.513	1	0.997
Rpl11	Rpl3	5030979	5028126	10090.ENSMUSP00000099595	10090.ENSMUSP00000080354	0.113	0	0	0	0.801	0.765	1	0.9	1	0.53	1	0.997
Rpl38	Rpl15	5031605	5027943	10090.ENSMUSP00000102213	10090.ENSMUSP00000079163	0	0	0	0	0.901	0.801	1	0.72	1	0.547	1	0.997
Ndufa13	Ndufb8	5032274	5018490	10090.ENSMUSP00000105796	10090.ENSMUSP00000026222	0	0	0	0	0.797	0.857	1	0.9	1	0.368	1	0.997
Rpl3	Rpl37a	5028126	5025033	10090.ENSMUSP00000080354	10090.ENSMUSP00000058919	0	0	0	0	0.808	0.859	1	0.9	1	0.32	1	0.997
Ndufb10	Ndufs1	5022532	5018711	10090.ENSMUSP00000043543	10090.ENSMUSP00000027111	0	0	0	0	0.239	0.961	1	0.9	1	0.369	1	0.997
Rpl35a	Rpl7	5033146	5026693	10090.ENSMUSP00000110731	10090.ENSMUSP00000071616	0	0	0	0	0.938	0.821	1	0.72	1	0.322	1	0.997
Rps24	Rps27a	5034648	5031143	10090.ENSMUSP00000125977	10090.ENSMUSP00000099909	0	0	0	0	0.878	0.889	1	0.72	1	0.523	1	0.997
Rplp2	Rpl4	5028293	5021039	10090.ENSMUSP00000081474	10090.ENSMUSP00000034966	0	0	0	0	0.839	0.82	1	0.9	1	0.271	1	0.997
Rpl37	Rps29	5023036	5021660	10090.ENSMUSP00000046506	10090.ENSMUSP00000038352	0	0	0	0	0.808	0.971	1	0	0	0.61	1	0.997
Rpl27-ps3	Rps11	5029953	5015656	10090.ENSMUSP00000095287	10090.ENSMUSP00000003521	0.153	0	0	0	0.814	0.958	1	0	0	0.626	1	0.997
Rpl31	Rps27	5036727	5035720	10090.ENSMUSP00000137631	10090.ENSMUSP00000132102	0	0	0	0	0.787	0.958	1	0	0	0.713	1	0.997
Rpl5	Rpl37a	5028222	5025033	10090.ENSMUSP00000080854	10090.ENSMUSP00000058919	0	0	0	0	0.899	0.856	1	0.72	1	0.455	1	0.997
Rpl34	Rpl37	5028844	5023036	10090.ENSMUSP00000086614	10090.ENSMUSP00000046506	0	0	0	0	0.798	0.801	1	0.9	1	0.519	1	0.997
Rps21	Rpl6	5024953	5020043	10090.ENSMUSP00000058432	10090.ENSMUSP00000031617	0	0	0	0	0.863	0.784	1	0.9	1	0.358	1	0.997
Rpl5	Rpl6	5028222	5020043	10090.ENSMUSP00000080854	10090.ENSMUSP00000031617	0.153	0	0	0	0.872	0.786	1	0.72	1	0.728	1	0.997
Cox5b	Uqcrc2	5028064	5020466	10090.ENSMUSP00000079944	10090.ENSMUSP00000033176	0	0	0	0	0.819	0.624	1	0.9	1	0.698	1	0.997
Psmd13	Psmc1	5018587	5017247	10090.ENSMUSP00000026560	10090.ENSMUSP00000021595	0	0	0	0	0.681	0.796	1	0.9	1	0.661	1	0.997
Rps27	Rplp2	5035720	5028293	10090.ENSMUSP00000132102	10090.ENSMUSP00000081474	0	0	0	0	0.765	0.796	1	0.9	1	0.522	1	0.997
Rpl11	Rpl6	5030979	5020043	10090.ENSMUSP00000099595	10090.ENSMUSP00000031617	0.088	0	0	0	0.775	0.701	1	0.9	1	0.573	1	0.996
Rpl15	Rps5	5027943	5015759	10090.ENSMUSP00000079163	10090.ENSMUSP00000004554	0	0	0	0	0.909	0.958	1	0	0	0.217	1	0.996
Rps19	Rps2	5031943	5029538	10090.ENSMUSP00000104067	10090.ENSMUSP00000092502	0	0	0	0	0.691	0.71	1	0.9	1	0.654	1	0.996
Ndufa10	Cyc1	5018820	5017751	10090.ENSMUSP00000027478	10090.ENSMUSP00000023210	0	0	0	0	0.813	0.664	1	0.9	1	0.471	1	0.996
Rps2	Rps29	5029538	5021660	10090.ENSMUSP00000092502	10090.ENSMUSP00000038352	0.076	0	0	0	0.668	0.933	1	0.72	1	0.49	1	0.996
Rpl7	Rps29	5026693	5021660	10090.ENSMUSP00000071616	10090.ENSMUSP00000038352	0.098	0	0	0	0.839	0.942	1	0	0	0.67	1	0.996
Rps8	Rpl10	5031065	5016095	10090.ENSMUSP00000099757	10090.ENSMUSP00000008826	0	0	0	0	0.883	0.954	1	0	0	0.392	1	0.996
Rps13	Rpl34	5034698	5028844	10090.ENSMUSP00000126294	10090.ENSMUSP00000086614	0	0	0	0	0.815	0.801	1	0.9	1	0.221	1	0.996
Rps20	Rpl15	5034139	5027943	10090.ENSMUSP00000120528	10090.ENSMUSP00000079163	0	0	0	0	0.862	0.958	1	0	0	0.518	1	0.996
Rps20	Rpl18	5034139	5031793	10090.ENSMUSP00000120528	10090.ENSMUSP00000103365	0.042	0	0	0	0.881	0.957	1	0	0	0.351	1	0.996
Rps13	Rpl15	5034698	5027943	10090.ENSMUSP00000126294	10090.ENSMUSP00000079163	0	0	0.219	0	0.808	0.958	1	0	0	0.553	1	0.996
Rpl27-ps3	Rpl10	5029953	5016095	10090.ENSMUSP00000095287	10090.ENSMUSP00000008826	0.074	0	0	0	0.653	0.945	1	0.72	1	0.329	1	0.996
Rps7	Rpl4	5027079	5021039	10090.ENSMUSP00000073880	10090.ENSMUSP00000034966	0	0	0	0	0.82	0.742	1	0.9	1	0.263	1	0.996
Rps15a	Rpl15	5034103	5027943	10090.ENSMUSP00000119975	10090.ENSMUSP00000079163	0	0	0.279	0	0.826	0.958	1	0	0	0.339	1	0.996
Uqcrc2	Ndufs2	5020466	5016267	10090.ENSMUSP00000033176	10090.ENSMUSP00000013737	0.042	0	0	0	0.71	0.739	1	0.9	1	0.635	1	0.996
Rps19	Rpl7	5031943	5026693	10090.ENSMUSP00000104067	10090.ENSMUSP00000071616	0	0	0	0	0.927	0.822	1	0	0	0.774	1	0.996
Rpl36al	Rpl36	5032361	5027972	10090.ENSMUSP00000106249	10090.ENSMUSP00000079340	0	0	0	0	0.699	0.938	1	0.54	1	0.635	1	0.996
Rpl27	Rps7	5029225	5027079	10090.ENSMUSP00000090305	10090.ENSMUSP00000073880	0	0	0	0	0.92	0.939	1	0	0	0.296	1	0.996
Psmd8	Psmd13	5023901	5018587	10090.ENSMUSP00000051657	10090.ENSMUSP00000026560	0	0	0	0	0.543	0.799	1	0.9	1	0.701	1	0.996
Rps27	Rps27a	5035720	5031143	10090.ENSMUSP00000132102	10090.ENSMUSP00000099909	0	0	0	0	0.826	0.801	1	0.9	1	0.186	1	0.996
Rpl6	Rps18	5020043	5016094	10090.ENSMUSP00000031617	10090.ENSMUSP00000008812	0.088	0	0	0	0.767	0.706	1	0.9	1	0.56	1	0.996
Rps27	Rps10	5035720	5033114	10090.ENSMUSP00000132102	10090.ENSMUSP00000110532	0	0	0	0	0.608	0.945	1	0.54	1	0.66	1	0.996
Rpl36al	Rps25	5032361	5027947	10090.ENSMUSP00000106249	10090.ENSMUSP00000079180	0	0	0	0	0.841	0.958	1	0	0	0.443	1	0.996
Rps28	Rpl27	5033019	5029225	10090.ENSMUSP00000110013	10090.ENSMUSP00000090305	0	0	0	0	0.896	0.945	1	0	0	0.453	1	0.996
Rpl36al	Rps5	5032361	5015759	10090.ENSMUSP00000106249	10090.ENSMUSP00000004554	0	0	0	0	0.856	0.958	1	0	0	0.501	1	0.996
Uba52	Rpl11	5034113	5030979	10090.ENSMUSP00000120096	10090.ENSMUSP00000099595	0	0	0	0	0.54	0.923	1	0.9	1	0.242	1	0.996
Uba52	Rps18	5034113	5016094	10090.ENSMUSP00000120096	10090.ENSMUSP00000008812	0	0	0	0	0.546	0.923	1	0.9	1	0.164	1	0.996
Rpl36a	Rpl27-ps3	5032811	5029953	10090.ENSMUSP00000108837	10090.ENSMUSP00000095287	0	0	0	0	0.712	0.945	1	0.72	1	0.315	1	0.996
Rpl36	Rps26	5027972	5018537	10090.ENSMUSP00000079340	10090.ENSMUSP00000026420	0	0	0	0	0.886	0.938	1	0	0	0.597	1	0.996
Rps24	Rpl27-ps3	5034648	5029953	10090.ENSMUSP00000125977	10090.ENSMUSP00000095287	0	0	0	0	0.803	0.958	1	0	0	0.654	1	0.996
Rps27a	Rpl11	5031143	5030979	10090.ENSMUSP00000099909	10090.ENSMUSP00000099595	0	0	0	0	0.82	0.768	1	0.9	1	0.216	1	0.996
Rplp2	Rpl36	5028293	5027972	10090.ENSMUSP00000081474	10090.ENSMUSP00000079340	0	0	0	0	0.794	0.762	1	0.9	1	0.368	1	0.996
Ndufb8	Cyc1	5018490	5017751	10090.ENSMUSP00000026222	10090.ENSMUSP00000023210	0	0	0	0	0.858	0.664	1	0.9	1	0.326	1	0.996
Rpl36	Rps3	5027972	5020408	10090.ENSMUSP00000079340	10090.ENSMUSP00000032998	0	0	0	0	0.826	0.73	1	0.9	1	0.385	1	0.996
Uqcrc2	Ndufa10	5020466	5018820	10090.ENSMUSP00000033176	10090.ENSMUSP00000027478	0	0	0	0	0.75	0.739	1	0.9	1	0.558	1	0.996
Rpl11	Rpl34	5030979	5028844	10090.ENSMUSP00000099595	10090.ENSMUSP00000086614	0.139	0	0	0	0.776	0.711	1	0.9	1	0.393	1	0.996
Rpl27	Rpl7	5029225	5026693	10090.ENSMUSP00000090305	10090.ENSMUSP00000071616	0.077	0	0	0	0.87	0.799	1	0.72	1	0.535	1	0.996
Rpl31	Rplp2	5036727	5028293	10090.ENSMUSP00000137631	10090.ENSMUSP00000081474	0.155	0	0	0	0.877	0.8	1	0.72	1	0.501	1	0.996
Ndufv2	Uqcrc2	5034213	5020466	10090.ENSMUSP00000121557	10090.ENSMUSP00000033176	0	0	0	0	0.695	0.739	1	0.9	1	0.592	1	0.996
Rpl31	Uba52	5036727	5034113	10090.ENSMUSP00000137631	10090.ENSMUSP00000120096	0	0	0	0	0.714	0.945	1	0.72	1	0.31	1	0.996
Rps27	Rpl6	5035720	5020043	10090.ENSMUSP00000132102	10090.ENSMUSP00000031617	0	0	0	0	0.722	0.736	1	0.9	1	0.624	1	0.996
Rpl36al	Rps11	5032361	5015656	10090.ENSMUSP00000106249	10090.ENSMUSP00000003521	0	0	0	0	0.862	0.958	1	0	0	0.496	1	0.996
Rpl15	Rpl6	5027943	5020043	10090.ENSMUSP00000079163	10090.ENSMUSP00000031617	0	0	0	0	0.905	0.734	1	0.72	1	0.62	1	0.996
Rpl15	Rps9	5027943	5015940	10090.ENSMUSP00000079163	10090.ENSMUSP00000006496	0	0	0.249	0	0.854	0.958	1	0	0	0.411	1	0.996
Rpl31	Rpl36	5036727	5027972	10090.ENSMUSP00000137631	10090.ENSMUSP00000079340	0	0	0	0	0.728	0.949	1	0.54	1	0.46	1	0.996
Rplp2	Rps18	5028293	5016094	10090.ENSMUSP00000081474	10090.ENSMUSP00000008812	0	0	0	0	0.768	0.763	1	0.9	1	0.513	1	0.996
Rpl27-ps3	Rps14	5029953	5018277	10090.ENSMUSP00000095287	10090.ENSMUSP00000025511	0.107	0	0	0	0.813	0.958	1	0	0	0.56	1	0.996
Rps27	Rpl14	5035720	5035620	10090.ENSMUSP00000132102	10090.ENSMUSP00000131489	0	0	0	0	0.756	0.785	1	0.9	1	0.477	1	0.996
Rps10	Rpl15	5033114	5027943	10090.ENSMUSP00000110532	10090.ENSMUSP00000079163	0	0	0	0	0.761	0.945	1	0	0	0.738	1	0.996
Rpl37	Rps26	5023036	5018537	10090.ENSMUSP00000046506	10090.ENSMUSP00000026420	0	0	0	0	0.793	0.958	1	0	0	0.627	1	0.996
Rps20	Rpl38	5034139	5031605	10090.ENSMUSP00000120528	10090.ENSMUSP00000102213	0	0	0	0	0.882	0.896	1	0	0	0.727	1	0.996
Ndufs8	Ndufb8	5027191	5018490	10090.ENSMUSP00000074600	10090.ENSMUSP00000026222	0	0	0	0	0.57	0.824	1	0.9	1	0.615	1	0.996
Rpl27-ps3	Rps25	5029953	5027947	10090.ENSMUSP00000095287	10090.ENSMUSP00000079180	0	0	0	0	0.814	0.958	1	0	0	0.634	1	0.996
Rps15a	Rpl36a	5034103	5032811	10090.ENSMUSP00000119975	10090.ENSMUSP00000108837	0	0	0	0	0.835	0.958	1	0	0	0.554	1	0.996
Rps27a	Rps26	5031143	5018537	10090.ENSMUSP00000099909	10090.ENSMUSP00000026420	0	0	0	0	0.906	0.801	1	0.72	1	0.422	1	0.996
Rpl39	Rpl36	5033187	5027972	10090.ENSMUSP00000110886	10090.ENSMUSP00000079340	0	0	0	0	0.731	0.946	1	0.54	1	0.474	1	0.996
Rpl3	Rpl36	5028126	5027972	10090.ENSMUSP00000080354	10090.ENSMUSP00000079340	0	0	0	0	0.776	0.76	1	0.9	1	0.423	1	0.996
Rpl38	Rps18	5031605	5016094	10090.ENSMUSP00000102213	10090.ENSMUSP00000008812	0	0	0	0	0.787	0.768	1	0.9	1	0.291	1	0.996
Ndufv1	Uqcrc2	5022440	5020466	10090.ENSMUSP00000042967	10090.ENSMUSP00000033176	0	0	0	0	0.62	0.739	1	0.9	1	0.676	1	0.996
Rps16	Rpl37	5031918	5023036	10090.ENSMUSP00000103940	10090.ENSMUSP00000046506	0	0	0	0	0.828	0.972	1	0	0	0.331	1	0.996
Rpl4	Rps18	5021039	5016094	10090.ENSMUSP00000034966	10090.ENSMUSP00000008812	0.113	0	0	0	0.755	0.757	1	0.9	1	0.455	1	0.996
Rpl36al	Rpl27-ps3	5032361	5029953	10090.ENSMUSP00000106249	10090.ENSMUSP00000095287	0	0	0	0	0.71	0.945	1	0.72	1	0.323	1	0.996
Rpl27-ps3	Rps5	5029953	5015759	10090.ENSMUSP00000095287	10090.ENSMUSP00000004554	0.096	0	0	0	0.811	0.958	1	0	0	0.515	1	0.996
Rpl36a	Rps3	5032811	5020408	10090.ENSMUSP00000108837	10090.ENSMUSP00000032998	0	0	0	0	0.862	0.958	1	0	0	0.485	1	0.996
Rpl36a	Rpl5	5032811	5028222	10090.ENSMUSP00000108837	10090.ENSMUSP00000080854	0	0	0	0	0.862	0.799	1	0.72	1	0.625	1	0.996
Rpl27-ps3	Rps29	5029953	5021660	10090.ENSMUSP00000095287	10090.ENSMUSP00000038352	0.088	0	0	0	0.727	0.955	1	0	0	0.694	1	0.996
Rps15a	Rpl36al	5034103	5032361	10090.ENSMUSP00000119975	10090.ENSMUSP00000106249	0	0	0	0	0.809	0.958	1	0	0	0.556	1	0.996
Rpl11	Rpl10	5030979	5016095	10090.ENSMUSP00000099595	10090.ENSMUSP00000008826	0.08	0	0	0	0.61	0.939	1	0.72	1	0.511	1	0.996
Rps7	Rpl6	5027079	5020043	10090.ENSMUSP00000073880	10090.ENSMUSP00000031617	0	0	0	0	0.848	0.698	1	0.9	1	0.404	1	0.996
Rpl3	Rps7	5028126	5027079	10090.ENSMUSP00000080354	10090.ENSMUSP00000073880	0	0	0	0	0.842	0.76	1	0.9	1	0.251	1	0.996
Rpl31	Rpl4	5036727	5021039	10090.ENSMUSP00000137631	10090.ENSMUSP00000034966	0	0	0	0	0.883	0.798	1	0.72	1	0.555	1	0.996
Rpl27	Rps3a1	5029225	5019462	10090.ENSMUSP00000090305	10090.ENSMUSP00000029722	0	0	0	0	0.85	0.958	1	0	0	0.444	1	0.996
Rpl5	Rpl37	5028222	5023036	10090.ENSMUSP00000080854	10090.ENSMUSP00000046506	0	0	0	0	0.809	0.847	1	0.72	1	0.616	1	0.996
Rplp2	Rpl5	5028293	5028222	10090.ENSMUSP00000081474	10090.ENSMUSP00000080854	0	0	0	0	0.823	0.817	1	0.72	1	0.668	1	0.996
Rpl36al	Rps23	5032361	5024346	10090.ENSMUSP00000106249	10090.ENSMUSP00000054490	0	0	0	0	0.825	0.958	1	0	0	0.586	1	0.996
Rplp2	Rps7	5028293	5027079	10090.ENSMUSP00000081474	10090.ENSMUSP00000073880	0	0	0	0	0.844	0.765	1	0.9	1	0.072	1	0.996
Ndufa10	Ndufs4	5018820	5017465	10090.ENSMUSP00000027478	10090.ENSMUSP00000022286	0	0	0	0	0.51	0.879	1	0.9	1	0.545	1	0.996
Rps16	Rpl27	5031918	5029225	10090.ENSMUSP00000103940	10090.ENSMUSP00000090305	0.088	0	0	0	0.872	0.958	1	0	0	0.382	1	0.996
Rpl3	Rpl15	5028126	5027943	10090.ENSMUSP00000080354	10090.ENSMUSP00000079163	0	0	0.299	0	0.842	0.8	1	0.72	1	0.518	1	0.996
Rpl36a	Rps21	5032811	5024953	10090.ENSMUSP00000108837	10090.ENSMUSP00000058432	0	0	0	0	0.963	0.801	1	0	0	0.487	1	0.996
Uqcrc2	Ndufs4	5020466	5017465	10090.ENSMUSP00000033176	10090.ENSMUSP00000022286	0	0	0	0	0.782	0.739	1	0.9	1	0.401	1	0.996
Rps10	Rpl36	5033114	5027972	10090.ENSMUSP00000110532	10090.ENSMUSP00000079340	0	0	0	0	0.846	0.939	1	0	0	0.668	1	0.996
Rps20	Rpl36a	5034139	5032811	10090.ENSMUSP00000120528	10090.ENSMUSP00000108837	0	0	0	0	0.858	0.958	1	0	0	0.431	1	0.996
Rpl31	Rpl3	5036727	5028126	10090.ENSMUSP00000137631	10090.ENSMUSP00000080354	0	0	0	0	0.832	0.817	1	0.72	1	0.494	1	0.995
Rpl36al	Rps29	5032361	5021660	10090.ENSMUSP00000106249	10090.ENSMUSP00000038352	0	0	0	0	0.779	0.958	1	0	0	0.543	1	0.995
Rpl14	Rps7	5035620	5027079	10090.ENSMUSP00000131489	10090.ENSMUSP00000073880	0	0	0	0	0.771	0.765	1	0.9	1	0.265	1	0.995
Rps16	Rpl36	5031918	5027972	10090.ENSMUSP00000103940	10090.ENSMUSP00000079340	0	0	0	0	0.81	0.95	1	0	0	0.579	1	0.995
Rps6	Rps2	5031125	5029538	10090.ENSMUSP00000099878	10090.ENSMUSP00000092502	0	0	0	0	0.701	0.709	1	0.9	1	0.55	1	0.995
Rps24	Rpl36	5034648	5027972	10090.ENSMUSP00000125977	10090.ENSMUSP00000079340	0	0	0	0	0.792	0.938	1	0	0	0.703	1	0.995
Rps20	Rpl3	5034139	5028126	10090.ENSMUSP00000120528	10090.ENSMUSP00000080354	0.139	0	0	0	0.916	0.821	1	0	0	0.71	1	0.995
Rps6	Fbl	5031125	5021545	10090.ENSMUSP00000099878	10090.ENSMUSP00000037613	0	0	0	0	0.655	0.763	1	0.9	1	0.486	1	0.995
Rps10	Rpl27-ps3	5033114	5029953	10090.ENSMUSP00000110532	10090.ENSMUSP00000095287	0	0	0	0	0.72	0.945	1	0	0	0.732	1	0.995
Rpl7	Rps18	5026693	5016094	10090.ENSMUSP00000071616	10090.ENSMUSP00000008812	0.098	0	0	0	0.816	0.942	1	0	0	0.585	1	0.995
Rps16	Rpl10	5031918	5016095	10090.ENSMUSP00000103940	10090.ENSMUSP00000008826	0.08	0	0	0	0.832	0.958	1	0	0	0.372	1	0.995
Rps16	Rpl15	5031918	5027943	10090.ENSMUSP00000103940	10090.ENSMUSP00000079163	0	0	0	0	0.864	0.958	1	0	0	0.261	1	0.995
Rpl36al	Rpl5	5032361	5028222	10090.ENSMUSP00000106249	10090.ENSMUSP00000080854	0	0	0	0	0.804	0.799	1	0.72	1	0.636	1	0.995
Rpl27	Rps9	5029225	5015940	10090.ENSMUSP00000090305	10090.ENSMUSP00000006496	0.107	0	0	0	0.864	0.958	1	0	0	0.138	1	0.995
Rpl34	Rpl7	5028844	5026693	10090.ENSMUSP00000086614	10090.ENSMUSP00000071616	0.119	0	0	0	0.871	0.799	1	0.72	1	0.463	1	0.995
Rps10	Rpl23	5033114	5030904	10090.ENSMUSP00000110532	10090.ENSMUSP00000099435	0	0	0	0	0.867	0.958	1	0	0	0.226	1	0.995
Uba52	Rpl38	5034113	5031605	10090.ENSMUSP00000120096	10090.ENSMUSP00000102213	0	0	0	0	0.712	0.743	1	0.9	1	0.438	1	0.995
Rps15a	Rpl27	5034103	5029225	10090.ENSMUSP00000119975	10090.ENSMUSP00000090305	0.153	0	0	0	0.832	0.958	1	0	0	0.343	1	0.995
Rpl18	Rpl27-ps3	5031793	5029953	10090.ENSMUSP00000103365	10090.ENSMUSP00000095287	0	0	0	0	0.804	0.801	1	0.72	1	0.656	1	0.995
Rpl15	Rpl4	5027943	5021039	10090.ENSMUSP00000079163	10090.ENSMUSP00000034966	0	0	0.215	0	0.87	0.795	1	0.72	1	0.405	1	0.995
Rpl36a	Rps6	5032811	5031125	10090.ENSMUSP00000108837	10090.ENSMUSP00000099878	0	0	0	0	0.845	0.958	1	0	0	0.343	1	0.995
Rpl39	Rpl4	5033187	5021039	10090.ENSMUSP00000110886	10090.ENSMUSP00000034966	0.08	0	0	0	0.821	0.804	1	0.72	1	0.591	1	0.995
Rps15a	Rpl27-ps3	5034103	5029953	10090.ENSMUSP00000119975	10090.ENSMUSP00000095287	0.153	0	0	0	0.808	0.958	1	0	0	0.354	1	0.995
Rpl27-ps3	Rpl5	5029953	5028222	10090.ENSMUSP00000095287	10090.ENSMUSP00000080854	0.153	0	0	0	0.791	0.8	1	0.72	1	0.654	1	0.995
Rps16	Rpl11	5031918	5030979	10090.ENSMUSP00000103940	10090.ENSMUSP00000099595	0.113	0	0	0	0.85	0.95	1	0	0	0.431	1	0.995
Uba52	Psmc5	5034113	5017086	10090.ENSMUSP00000120096	10090.ENSMUSP00000021049	0	0	0	0	0.062	0.945	1	0.9	1	0.171	1	0.995
Rps2	Rps3a1	5029538	5019462	10090.ENSMUSP00000092502	10090.ENSMUSP00000029722	0	0	0.213	0	0.704	0.71	1	0.9	1	0.465	1	0.995
Rps2	Rpl3	5029538	5028126	10090.ENSMUSP00000092502	10090.ENSMUSP00000080354	0.076	0	0	0	0.694	0.706	1	0.9	1	0.583	1	0.995
Rps6	Rpl7	5031125	5026693	10090.ENSMUSP00000099878	10090.ENSMUSP00000071616	0	0	0	0	0.938	0.84	1	0	0	0.619	1	0.995
Rps27	Rpl34	5035720	5028844	10090.ENSMUSP00000132102	10090.ENSMUSP00000086614	0	0	0	0	0.771	0.742	1	0.9	1	0.311	1	0.995
Rpl39	Rplp2	5033187	5028293	10090.ENSMUSP00000110886	10090.ENSMUSP00000081474	0	0	0	0	0.837	0.804	1	0.72	1	0.596	1	0.995
Rpl27-ps3	Rps3a1	5029953	5019462	10090.ENSMUSP00000095287	10090.ENSMUSP00000029722	0	0	0	0	0.809	0.958	1	0	0	0.454	1	0.995
Rpl36a	Rplp2	5032811	5028293	10090.ENSMUSP00000108837	10090.ENSMUSP00000081474	0	0	0	0	0.85	0.796	1	0.72	1	0.496	1	0.995
Rpl5	Rps23	5028222	5024346	10090.ENSMUSP00000080854	10090.ENSMUSP00000054490	0.172	0	0	0	0.916	0.879	1	0	0	0.575	1	0.995
Rpl27	Rpl34	5029225	5028844	10090.ENSMUSP00000090305	10090.ENSMUSP00000086614	0.107	0	0	0	0.906	0.742	1	0.72	1	0.402	1	0.995
Rps2	Rpl10a	5029538	5023403	10090.ENSMUSP00000092502	10090.ENSMUSP00000048469	0.091	0	0	0	0.742	0.71	1	0.9	1	0.416	1	0.995
Rps16	Rpl27-ps3	5031918	5029953	10090.ENSMUSP00000103940	10090.ENSMUSP00000095287	0.088	0	0	0	0.811	0.958	1	0	0	0.394	1	0.995
Uba52	Rpl36al	5034113	5032361	10090.ENSMUSP00000120096	10090.ENSMUSP00000106249	0	0	0	0	0.567	0.932	1	0.72	1	0.494	1	0.995
Rps6	Rpl27	5031125	5029225	10090.ENSMUSP00000099878	10090.ENSMUSP00000090305	0	0	0	0	0.871	0.958	1	0	0	0.243	1	0.995
Rps2	Rps25	5029538	5027947	10090.ENSMUSP00000092502	10090.ENSMUSP00000079180	0	0	0	0	0.661	0.71	1	0.9	1	0.593	1	0.995
Rpl36a	Rps9	5032811	5015940	10090.ENSMUSP00000108837	10090.ENSMUSP00000006496	0	0	0	0	0.82	0.958	1	0	0	0.506	1	0.995
Ndufv2	Cyc1	5034213	5017751	10090.ENSMUSP00000121557	10090.ENSMUSP00000023210	0	0	0	0	0.828	0.723	1	0.9	1	0.242	1	0.995
Uba52	Rpl36a	5034113	5032811	10090.ENSMUSP00000120096	10090.ENSMUSP00000108837	0	0	0	0	0.587	0.932	1	0.72	1	0.494	1	0.995
Rpl39	Rpl5	5033187	5028222	10090.ENSMUSP00000110886	10090.ENSMUSP00000080854	0	0	0	0	0.82	0.811	1	0.72	1	0.627	1	0.995
Rps13	Rps2	5034698	5029538	10090.ENSMUSP00000126294	10090.ENSMUSP00000092502	0	0	0.215	0	0.628	0.71	1	0.9	1	0.509	1	0.995
Rps27a	Rps18	5031143	5016094	10090.ENSMUSP00000099909	10090.ENSMUSP00000008812	0	0	0	0	0.821	0.768	1	0.9	1	0.132	1	0.995
Rpl34	Rpl15	5028844	5027943	10090.ENSMUSP00000086614	10090.ENSMUSP00000079163	0	0	0	0	0.91	0.742	1	0.72	1	0.407	1	0.995
Rpl14	Rpl27-ps3	5035620	5029953	10090.ENSMUSP00000131489	10090.ENSMUSP00000095287	0	0	0	0	0.813	0.799	1	0.72	1	0.583	1	0.995
Rpl36al	Rps9	5032361	5015940	10090.ENSMUSP00000106249	10090.ENSMUSP00000006496	0	0	0	0	0.805	0.958	1	0	0	0.507	1	0.995
Rplp2	Rpl7	5028293	5026693	10090.ENSMUSP00000081474	10090.ENSMUSP00000071616	0	0	0	0	0.84	0.816	1	0.72	1	0.55	1	0.995
Rps2	Rps9	5029538	5015940	10090.ENSMUSP00000092502	10090.ENSMUSP00000006496	0.091	0	0	0	0.672	0.71	1	0.9	1	0.517	1	0.995
Rps16	Rpl3	5031918	5028126	10090.ENSMUSP00000103940	10090.ENSMUSP00000080354	0.113	0	0	0	0.923	0.862	1	0	0	0.547	1	0.995
Rps24	Rpl22	5034648	5034020	10090.ENSMUSP00000125977	10090.ENSMUSP00000118787	0	0	0	0	0.914	0.819	1	0	0	0.744	1	0.995
Rps23	Rpl10	5024346	5016095	10090.ENSMUSP00000054490	10090.ENSMUSP00000008826	0.098	0	0	0	0.828	0.958	1	0	0	0.396	1	0.995
Rpl7	Rps3	5026693	5020408	10090.ENSMUSP00000071616	10090.ENSMUSP00000032998	0.164	0	0	0	0.923	0.798	1	0	0	0.691	1	0.995
Rpl36	Rps29	5027972	5021660	10090.ENSMUSP00000079340	10090.ENSMUSP00000038352	0	0	0	0	0.847	0.932	1	0	0	0.571	1	0.995
Rpl36a	Rps26	5032811	5018537	10090.ENSMUSP00000108837	10090.ENSMUSP00000026420	0	0	0	0	0.896	0.945	1	0	0	0.314	1	0.995
Rpl36a	Rps14	5032811	5018277	10090.ENSMUSP00000108837	10090.ENSMUSP00000025511	0	0	0	0	0.863	0.958	1	0	0	0.321	1	0.995
Rpl14	Rpl36a	5035620	5032811	10090.ENSMUSP00000131489	10090.ENSMUSP00000108837	0	0	0	0	0.83	0.801	1	0.72	1	0.568	1	0.995
Ndufs1	Cyc1	5018711	5017751	10090.ENSMUSP00000027111	10090.ENSMUSP00000023210	0	0	0	0	0.816	0.664	1	0.9	1	0.299	1	0.995
Rps27	Rpl39	5035720	5033187	10090.ENSMUSP00000132102	10090.ENSMUSP00000110886	0	0	0	0	0.786	0.958	1	0	0	0.55	1	0.995
Cyc1	Ndufb9	5017751	5017677	10090.ENSMUSP00000023210	10090.ENSMUSP00000022980	0	0	0	0	0.832	0.664	1	0.9	1	0.239	1	0.995
Rpl22	Rps26	5034020	5018537	10090.ENSMUSP00000118787	10090.ENSMUSP00000026420	0	0	0	0	0.829	0.958	1	0	0	0.409	1	0.995
Rpl36al	Rpl38	5032361	5031605	10090.ENSMUSP00000106249	10090.ENSMUSP00000102213	0	0	0	0	0.862	0.801	1	0.72	1	0.535	1	0.995
Uba52	Rpl39	5034113	5033187	10090.ENSMUSP00000120096	10090.ENSMUSP00000110886	0	0	0	0	0.706	0.945	1	0.72	1	0.142	1	0.995
Rps2	Rpl4	5029538	5021039	10090.ENSMUSP00000092502	10090.ENSMUSP00000034966	0.076	0	0.216	0	0.682	0.703	1	0.9	1	0.448	1	0.995
Rps10	Rps21	5033114	5024953	10090.ENSMUSP00000110532	10090.ENSMUSP00000058432	0	0	0	0	0.908	0.801	1	0.72	1	0.2	1	0.995
Rps28	Rpl36a	5033019	5032811	10090.ENSMUSP00000110013	10090.ENSMUSP00000108837	0	0	0	0	0.885	0.945	1	0	0	0.305	1	0.995
Rps16	Rpl5	5031918	5028222	10090.ENSMUSP00000103940	10090.ENSMUSP00000080854	0.17	0	0	0	0.933	0.866	1	0	0	0.471	1	0.995
Rpl14	Rpl27	5035620	5029225	10090.ENSMUSP00000131489	10090.ENSMUSP00000090305	0	0	0	0	0.825	0.799	1	0.72	1	0.576	1	0.995
Rpl27	Rps3	5029225	5020408	10090.ENSMUSP00000090305	10090.ENSMUSP00000032998	0.153	0	0	0	0.848	0.958	1	0	0	0.249	1	0.995
Rpl27	Rplp2	5029225	5028293	10090.ENSMUSP00000090305	10090.ENSMUSP00000081474	0	0	0	0	0.864	0.8	1	0.72	1	0.439	1	0.995
Rpl14	Rps16	5035620	5031918	10090.ENSMUSP00000131489	10090.ENSMUSP00000103940	0.088	0	0	0	0.909	0.858	1	0	0	0.658	1	0.995
Rpl5	Rps9	5028222	5015940	10090.ENSMUSP00000080854	10090.ENSMUSP00000006496	0.172	0	0	0	0.874	0.852	1	0	0	0.759	1	0.995
Rpl36al	Rps3	5032361	5020408	10090.ENSMUSP00000106249	10090.ENSMUSP00000032998	0	0	0	0	0.806	0.958	1	0	0	0.491	1	0.995
Rps10	Rpl11	5033114	5030979	10090.ENSMUSP00000110532	10090.ENSMUSP00000099595	0	0	0	0	0.699	0.939	1	0	0	0.77	1	0.995
Rpl11	Rplp2	5030979	5028293	10090.ENSMUSP00000099595	10090.ENSMUSP00000081474	0	0	0	0	0.756	0.754	1	0.9	1	0.379	1	0.995
Rpl36a	Rps16	5032811	5031918	10090.ENSMUSP00000108837	10090.ENSMUSP00000103940	0	0	0	0	0.862	0.958	1	0	0	0.183	1	0.994
Rpl36al	Rps26	5032361	5018537	10090.ENSMUSP00000106249	10090.ENSMUSP00000026420	0	0	0	0	0.861	0.945	1	0	0	0.315	1	0.994
Uba52	Psmc6	5034113	5017492	10090.ENSMUSP00000120096	10090.ENSMUSP00000022380	0	0	0	0	0.068	0.945	1	0.9	1	0.06	1	0.994
Rps20	Rpl36al	5034139	5032361	10090.ENSMUSP00000120528	10090.ENSMUSP00000106249	0	0	0	0	0.8	0.958	1	0	0	0.432	1	0.994
Ndufs8	Uqcrc2	5027191	5020466	10090.ENSMUSP00000074600	10090.ENSMUSP00000033176	0	0	0	0	0.433	0.777	1	0.9	1	0.621	1	0.994
Rpl31	Rps7	5036727	5027079	10090.ENSMUSP00000137631	10090.ENSMUSP00000073880	0	0	0	0	0.815	0.95	1	0	0	0.463	1	0.994
Uba52	Psmd14	5034113	5019035	10090.ENSMUSP00000120096	10090.ENSMUSP00000028278	0	0	0	0	0.095	0.945	1	0.9	1	0.101	1	0.994
Rpl27	Rps23	5029225	5024346	10090.ENSMUSP00000090305	10090.ENSMUSP00000054490	0.088	0	0	0	0.836	0.958	1	0	0	0.274	1	0.994
Rps13	Rpl36a	5034698	5032811	10090.ENSMUSP00000126294	10090.ENSMUSP00000108837	0	0	0	0	0.803	0.958	1	0	0	0.345	1	0.994
[truncated: 393 more rows]
